# Supplementary material for: Stereospecific and Chemoselective Copper‐Catalyzed Deaminative Silylation of Benzylic Ammonium Triflates
Source: PubMed Central journal article supplement — Angew Chem Int Ed Engl. 2019 Dec 4;59(4):1577–80. doi: 10.1002/anie.201912490 (PMC7003868; doi:10.1002/anie.201912490), 2019-12-04
Supplement: ANIE-59-1577-s001.pdf [file ANIE-59-1577-s001.pdf]

Supporting Information

**Stereospecific and Chemoselective Copper-Catalyzed Deaminative  
Silylation of Benzylic Ammonium Triflates**

*Jonas Scharfbier, Benjamin M. Gross, and Martin Oestreich\**

anie\_201912490\_sm\_miscellaneous\_information.pdf

**Table of Contents**

|            |                                                                                                                  |            |
|------------|------------------------------------------------------------------------------------------------------------------|------------|
| <b>1.</b>  | <b>General Information .....</b>                                                                                 | <b>3</b>   |
| <b>2.</b>  | <b>Optimization Study .....</b>                                                                                  | <b>4</b>   |
| <b>3.</b>  | <b>General Procedures .....</b>                                                                                  | <b>6</b>   |
| <b>3.1</b> | <b>General Procedure for the Synthesis of Ammonium Triflates (GP1) .....</b>                                     | <b>6</b>   |
| <b>3.2</b> | <b>General Procedure for the Nucleophilic Silylation (GP2) .....</b>                                             | <b>6</b>   |
| <b>3.3</b> | <b>General Procedure for the Oxidation of the 1,1,2,2-Tetramethyl-1,2-diphenyldisilane Byproduct (GP3) .....</b> | <b>6</b>   |
| <b>4.</b>  | <b>Preparation and Characterization Data for the Ammonium Triflates .....</b>                                    | <b>7</b>   |
| <b>5.</b>  | <b>Experimental Details of the Nucleophilic Silylation and Characterization Data .....</b>                       | <b>16</b>  |
| <b>6.</b>  | <b>Assignment of the Absolute Configuration of Dimethyl(phenyl)(1-phenylethyl)silane (4aa) ..</b>                | <b>24</b>  |
| <b>7.</b>  | <b>NMR Spectra .....</b>                                                                                         | <b>25</b>  |
| <b>8.</b>  | <b>HPLC Traces of Synthesized Chiral Substrates .....</b>                                                        | <b>26</b>  |
| <b>9.</b>  | <b>HPLC Traces of Chiral Silanes .....</b>                                                                       | <b>206</b> |
| <b>10.</b> | <b>References .....</b>                                                                                          | <b>219</b> |

## 1. General Information

Reactions were performed in flame-dried glassware using conventional SCHLENK-techniques under a static pressure of nitrogen unless otherwise stated. Liquids and solutions were transferred with syringes. Solvents ( $\text{CH}_2\text{Cl}_2$ , *n*-hexane, THF, NMP) were dried and purified following standard procedures. Technical grade solvents for extraction or chromatography (*tert*-butyl methyl ether, cyclohexane,  $\text{CH}_2\text{Cl}_2$ , ethanol, ethyl acetate, *n*-pentane and MeOH) were distilled prior to use. Other chemicals were purchased from commercial sources and used as received. Compounds prepared according to literature procedures: Dimethyl(phenyl)(4,4,5,5-tetramethyl-1,3,2-dioxaborolan-2-yl)silane<sup>[S1]</sup>. The racemic dimethylamines were prepared using ESCHWEILER–CLARKE reactions<sup>[S2]</sup>, or by reductive amination of the corresponding acetophenone derivatives.<sup>[S3]</sup> The following enantioenriched benzylic amines were commercially available and used as received: (*R*)-**S1a** (>99% ee), (*S*)-**S1f** (98% ee), (*R*)-**S1g** (98% ee), (*S*)-**S1h** (98% ee), (*R*)-**S1i** (99% ee), (*R*)-**S1m** (99% ee). Other enantioenriched benzylic amines were prepared by diastereoselective reduction of *tert*-butyl sulfinamides.<sup>[S4]</sup> The enantiomeric excess of the synthesized amines was determined after derivatization to the respective amide with 4-Nitrobenzoyl chloride. *N,N*-dimethyl-4-phenylbut-3-yn-2-amine and (*R*)-*N,N*-dimethyl-4-phenylbut-3-yn-2-amine were synthesized according to a literature procedure.<sup>[S5]</sup> Analytical thin layer chromatography (TLC) was performed on ALUGRAM® Xtra SIL G/UV<sub>254</sub> TLC-Sheets by *Macherey-Nagel*. Flash column chromatography was performed on silica gel 60 (40–63  $\mu\text{m}$ , 230–400 mesh, ASTM) by *Grace* using the indicated solvents. <sup>1</sup>H, <sup>13</sup>C, <sup>19</sup>F, and <sup>29</sup>Si NMR spectra were recorded in  $\text{CDCl}_3$  or  $\text{DMSO}-d_6$  on Bruker AV400, AV500, or AV700 instruments. Chemical shifts are reported in parts per million (ppm) and are referenced to the residual solvent resonance as the internal standard ( $\text{CHCl}_3$ :  $\delta = 7.26$  ppm for <sup>1</sup>H NMR and  $\text{CDCl}_3$ :  $\delta = 77.16$  ppm for <sup>13</sup>C NMR;  $\text{DMSO}-d_6$ :  $\delta = 2.50$  ppm for <sup>1</sup>H NMR and  $\text{DMSO}-d_6$ :  $\delta = 39.52$  ppm for <sup>13</sup>C NMR). Data are reported as follows: chemical shift, multiplicity (br = broad signal, s = singlet, d = doublet, t = triplet, q = quartet, sept = septet, m = multiplet), coupling constants (Hz), and integration. Gas liquid chromatography (GLC) was performed on an *Agilent Technologies* 7820A gas chromatograph equipped with a HP-5 capillary column (30 m  $\times$  0.32 mm, 0.25  $\mu\text{m}$  film thickness) by *Agilent Technologies/CS-Chro-matographie Service* using the following program:  $\text{N}_2$  carrier gas, injection temperature 250 °C, detector temperature 300 °C, flow rate: 1.7 mL/min; temperature program: start temperature 40 °C, heating rate 10 °C/min, end temperature 280 °C for 10 min. Infrared (IR) spectra were recorded on an *Agilent Technologies* Cary 630 FT-IR spectrometer equipped with an ATR unit and the signals are reported in wavenumbers ( $\text{cm}^{-1}$ ). Melting points (m.p.) were determined with a *Stuart Scientific* SMP20 melting point apparatus and are not corrected. The solvent used for precipitation and washing is quoted in parentheses. High resolution mass spectrometry (HRMS) analysis was performed by the Analytical Facility at the *Institut für Chemie, Technische Universität Berlin*. The compound names were generated by the computer program *ChemDraw* according to the guidelines specified by the *International Union of Pure and Applied Chemistry* (IUPAC).

## SUPPORTING INFORMATION

## 2. Optimization Study

**General procedure for the optimization reactions:** In a nitrogen-filled glove box, the copper salt (25  $\mu$ mol, 10 mol%), the base (0.38 mmol, 1.5 equiv), and a magnetic stir bar are subsequently added to a flame-dried Schlenk tube. The tube is transferred to a Schlenk line outside the glove box, and the corresponding benzylic ammonium triflate is added, followed by tetracosane as the internal standard. The tube is evacuated and backfilled with  $N_2$  (3 times). The solvent (1 mL) is added, and the resulting suspension is stirred for 15 min at rt. The mixture is cooled to 0  $^{\circ}C$  and dimethyl(phenyl)(4,4,5,5-tetramethyl-1,3,2-dioxaborolan-2-yl)silane (1.5 equiv) is added dropwise. The reaction mixture is kept at 0  $^{\circ}C$  for 2 h and, after this time, an aliquot of the reaction mixture is subjected to GLC analysis.

**Table S1:** Screening of solvents in the silylation of **1a**.

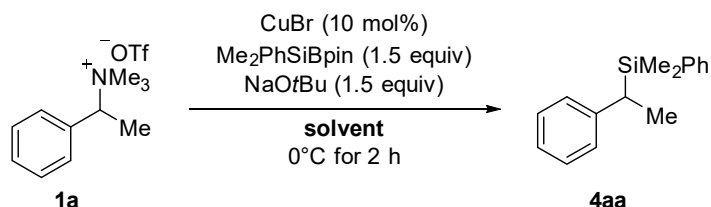

| entry | solvent                         | yield <sup>[a]</sup> |
|-------|---------------------------------|----------------------|
| 1     | Et <sub>2</sub> O               | 50 (68 after 18 h)   |
| 2     | THF                             | 92                   |
| 3     | 1,4-Dioxane                     | 77 (84 after 18 h)   |
| 4     | toluene                         | 30 (46 after 18 h)   |
| 5     | CH <sub>2</sub> Cl <sub>2</sub> | n.d.                 |
| 6     | THF/NMP (9:1)                   | 12                   |
| 7     | THF/DMSO (9:1)                  | 45                   |
| 8     | THF/1,4-dioxane                 | 75                   |

[a] Determined by GLC analysis using tetracosane as internal standard. n.d. = not determined.

**Table S2:** Screening of copper salts in the silylation of **1a**.

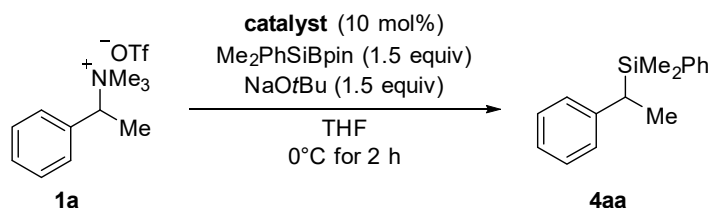

| entry | catalyst              | yield <sup>[a]</sup> |
|-------|-----------------------|----------------------|
| 1     | CuCl                  | 78                   |
| 2     | CuBr                  | 92                   |
| 3     | CuI                   | 71                   |
| 4     | CuOTf                 | 84                   |
| 5     | CuCN                  | 65                   |
| 6     | CUSCN                 | 56                   |
| 7     | Cu(Tc)                | 64                   |
| 8     | CuOAc                 | 52                   |
| 9     | Cu(acac) <sub>2</sub> | 45                   |

[a] Determined by GLC analysis using tetracosane as internal standard.

## SUPPORTING INFORMATION

**Table S3:** Screening of bases in the silylation of **1a**.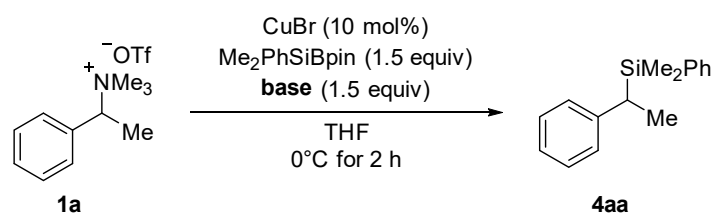

| entry | catalyst | yield <sup>[a]</sup> |
|-------|----------|----------------------|
| 1     | LiOMe    | n.d.                 |
| 2     | NaOMe    | 46                   |
| 3     | KOMe     | 7                    |
| 4     | LiOtBu   | 69                   |
| 5     | NaOtBu   | 92                   |
| 6     | KOtBu    | n.d.                 |

[a] Determined by GLC analysis using tetracosane as internal standard.

### 3. General Procedures

#### 3.1 General Procedure for the Synthesis of Ammonium Triflates (GP1)

According to a modified literature procedure,<sup>[S5]</sup> the corresponding dimethylamine was dissolved in Et<sub>2</sub>O (1.0M), and the resulting solution was cooled to 0 °C with an icewater bath. At this temperature, methyl triflate was slowly added dropwise. The suspension was stirred 15 min at 0 °C, the ice bath was removed, and the mixture was stirred for another 15 min at rt. The solvent was removed carefully with a pipette, and the residue was washed with Et<sub>2</sub>O (2 × 3 mL) and then covered with Et<sub>2</sub>O to complete the precipitation of the salt (if it had not occurred yet). In some cases the salts were purified by flash column chromatography on silica gel using the indicated mixture of CH<sub>2</sub>Cl<sub>2</sub> and MeOH. The precipitate was filtered over a sintered funnel, washed with Et<sub>2</sub>O and dried under oil pump vacuum. The ammonium salts were obtained as white or yellowish microcrystalline solids, that were grinded to powders with mortar and pestle for better solubility.

#### 3.2 General Procedure for the Nucleophilic Silylation (GP2)

In a nitrogen-filled glove box, CuBr (3.6 mg, 25 μmol, 10 mol%), NaOtBu (36 mg, 0.38 mmol, 1.5 equiv), and a magnetic stir bar are subsequently added to a flame-dried Schlenk tube. The tube is transferred to a SCHLENK-line outside the glove box, and THF (1 mL) is added. The resulting suspension is stirred for 15 min at rt and then cooled to 0 °C. Dimethyl(phenyl)(4,4,5,5-tetramethyl-1,3,2-dioxaborolan-2-yl)silane (1.5 equiv) is added dropwise, followed by the corresponding ammonium triflate. The walls of the SCHLENK-tube are washed with THF (0.5 mL), and the reaction mixture is kept at 0 °C for 2 h. After this time, the reaction mixture is diluted with cyclohexane (2 mL), filtered through a short plug of silica gel, and the reaction tube and silica gel are rinsed with ethyl acetate (3 × 5 mL). The collected filtrate is concentrated under reduced pressure, and the residue is purified by flash column chromatography on silica gel using the indicated mixture of cyclohexane and ethyl acetate.

#### 3.3 General Procedure for the Oxidation of the 1,1,2,2-Tetramethyl-1,2-diphenyldisilane Byproduct (GP3)

According to a modified literature procedure,<sup>[S6]</sup> Au/TiO<sub>2</sub> (100 mg, ~2.0 mol% in Au) and a magnetic stir bar are added to a glass vial (6 mL) in a nitrogen-filled glove box. Outside the glove box, the crude mixture of the preceding silylation is transferred to this vial with ethyl acetate (3 × 0.3 mL), and one drop of H<sub>2</sub>O (3–5 mg) is added. The reaction is stirred for 3 h at rt and after this time the reaction mixture is diluted with cyclohexane (3 mL), filtered through a short plug of silica gel, and the reaction tube and silica gel are rinsed with a solution of ethyl acetate in cyclohexane (20%, 3 × 5 mL). The collected filtrate is concentrated under reduced pressure, and the residue is purified by flash column chromatography on silica gel using the indicated mixture of cyclohexane and ethyl acetate.

## 4. Preparation and Characterization Data for the Ammonium Triflates

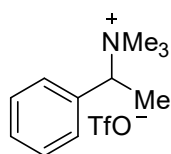**1a**

$C_{12}H_{18}F_3NO_3S$   
 M = 313.34 g/mol

***N,N,N*-Trimethyl-1-phenylethan-1-aminium trifluoromethanesulfonate (1a).** Prepared from *N,N*-dimethyl-1-phenylethan-1-amine (2.55 mg, 17.1 mmol, 1.00 equiv) according to **GP1**, using MeOTf (2.08 mL, 18.8 mmol, 1.1 equiv). Vacuum filtration and subsequent rinsing of the precipitate with Et<sub>2</sub>O (3 × 25 mL) afforded the title compound **1a** (4.60 g, 14.7 mmol, 86%) as a white powder. **<sup>1</sup>H NMR** (500 MHz, DMSO-*d*<sub>6</sub>): δ/ppm = 1.72 (d, *J* = 7.0 Hz, 3H), 2.97 (s, 9H), 4.76 (q, *J* = 7.0 Hz, 1H), 7.45–7.55 (m, 3H), 7.56–7.64 (m, 2H). **<sup>13</sup>C {<sup>1</sup>H} NMR** (126 MHz, DMSO-*d*<sub>6</sub>): δ/ppm = 14.5, 50.5 (t, *J* = 3.8 Hz, [H<sub>3</sub>C]<sub>3</sub>N), 72.6, 120.7 (q, *J* = 322 Hz, CF<sub>3</sub>), 128.9, 130.2, 130.5, 133.5. **<sup>19</sup>F {<sup>1</sup>H} NMR** (659 MHz, DMSO-*d*<sub>6</sub>): δ/ppm = –77.7 (CF<sub>3</sub>). **IR** (ATR):  $\tilde{\nu}/\text{cm}^{-1}$  = 3037, 2294, 2104, 1478, 1249, 1154, 1026, 954, 841, 774, 710. **HRMS** (ESI) calculated for C<sub>11</sub>H<sub>18</sub>N<sup>+</sup> [M–OTf]<sup>+</sup>: 164.1434; found: 164.1434. The spectroscopic data are in accordance with those reported.<sup>[S7]</sup>

***(R)*-*N,N,N*-Trimethyl-1-phenylethan-1-aminium trifluoromethanesulfonate [(*R*)-1a].** Prepared from (*R*)-*N,N*-dimethyl-1-phenylethan-1-amine (336 mg, 2.25 mmol, 1.00 equiv) according to **GP1**, using MeOTf (0.30 mL, 2.7 mmol, 1.2 equiv). Vacuum filtration and subsequent rinsing of the precipitate with Et<sub>2</sub>O (3 × 10 mL) afforded the title compound (*R*)-**1a** (684 mg, 2.18 mmol, 97%) as a white powder. **Optical rotation**: [α] = +0.60 (*c* = 1.00, CHCl<sub>3</sub>, >99% ee). The enantiomeric excess was indicated by a label on the bottle of the corresponding amine.

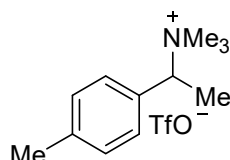**1b**

$C_{13}H_{20}F_3NO_3S$   
 M = 327.36 g/mol

***N,N,N*-Trimethyl-1-(*p*-tolyl)ethan-1-aminium trifluoromethanesulfonate (1b).** Prepared from *N,N*-dimethyl-1-(*p*-tolyl)ethan-1-amine (303 mg, 1.86 mmol, 1.00 equiv) according to **GP1**, using MeOTf (0.25 mL, 2.23 mmol, 1.2 equiv). Vacuum filtration and subsequent rinsing of the precipitate with Et<sub>2</sub>O (3 × 10 mL) afforded the title compound **1b** (514 mg, 1.57 mmol, 84%) as a white powder. **<sup>1</sup>H NMR** (400 MHz, DMSO-*d*<sub>6</sub>): δ/ppm = 1.69 (d, *J* = 7.0 Hz, 3H), 2.35 (s, 3H), 2.95 (s, 9H), 4.71 (q, *J* = 7.0 Hz, 1H), 7.28–7.33 (m, 2H), 7.43–7.51 (m, 2H). **<sup>13</sup>C {<sup>1</sup>H} NMR** (101 MHz, DMSO-*d*<sub>6</sub>): δ/ppm = 14.5, 20.7, 50.4 (t, *J* = 4.0 Hz, [H<sub>3</sub>C]<sub>3</sub>N), 72.4, 120.7 (q, *J* = 322 Hz, CF<sub>3</sub>), 129.4, 130.4, 130.5, 139.8. **<sup>19</sup>F {<sup>1</sup>H} NMR** (471 MHz, DMSO-*d*<sub>6</sub>): δ/ppm = –77.7 (CF<sub>3</sub>). **IR** (ATR):  $\tilde{\nu}/\text{cm}^{-1}$  = 3034, 1477, 1254, 1151, 1027, 953, 825, 756. **HRMS** (ESI) calculated for C<sub>12</sub>H<sub>20</sub>N<sup>+</sup> [M–OTf]<sup>+</sup>: 178.1590; found: 178.1588.

***(R)*-*N,N,N*-Trimethyl-1-(*p*-tolyl)ethan-1-aminium trifluoromethanesulfonate [(*R*)-1b].** Prepared from (*R*)-*N,N*-dimethyl-1-(*p*-tolyl)ethan-1-amine (120 mg, 0.735 mmol, 1.00 equiv) according to **GP1**, using MeOTf (0.10 mL, 0.88 mmol, 1.2 equiv). Vacuum filtration and subsequent rinsing of the precipitate with Et<sub>2</sub>O (3 × 10 mL) afforded the title compound (*R*)-**1b** (167 mg, 0.51 mmol, 69%) as a white powder. **Optical rotation**: [α] = –14.3 (*c* = 0.10, CHCl<sub>3</sub>, 98% ee). The enantiomeric excess of (*R*)-**1b** was determined at the stage of the 4-nitrobenzoyl amide (See Ch9 for HPLC traces). HPLC analysis on a chiral stationary phase (Daicel Chiralcel IA column, column temperature 20 °C, solvent *n*-heptane:isopropanol = 80:20, flow rate 1 mL/min, λ = 210 nm): *t*<sub>R</sub> = 8.8 min for (*S*)-**1b**, *t*<sub>R</sub> = 12.0 min for (*R*)-**1b**.

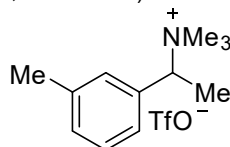**1c**

$C_{13}H_{20}F_3NO_3S$   
 M = 327.36 g/mol

***N,N,N*-Trimethyl-1-(*m*-tolyl)ethan-1-aminium trifluoromethanesulfonate (1c).** Prepared from *N,N*-dimethyl-1-(*m*-tolyl)ethan-1-amine (464 mg, 2.84 mmol, 1.00 equiv) according to **GP1**, using MeOTf (0.39 mL, 3.4 mmol, 1.2 equiv). Vacuum filtration and subsequent rinsing of the precipitate with Et<sub>2</sub>O (3 × 10 mL) afforded the title compound **1c** (822 mg, 2.51 mmol, 88%) as a white powder. **<sup>1</sup>H NMR** (400 MHz, DMSO-*d*<sub>6</sub>): δ/ppm = 1.70 (d, *J* = 7.0 Hz, 3H), 2.36 (s, 3H), 2.97 (s, 9H), 4.70 (q, *J* = 7.0 Hz, 1H), 7.29–7.43 (m, 4H). **<sup>13</sup>C {<sup>1</sup>H} NMR** (101 MHz, DMSO-*d*<sub>6</sub>): δ/ppm = 14.5, 20.9, 50.5 (t, *J* = 3.7 Hz, [H<sub>3</sub>C]<sub>3</sub>N), 72.7, 120.7 (q, *J* = 322 Hz, CF<sub>3</sub>), 127.6, 128.7, 130.7, 130.9, 133.4, 138.2. **<sup>19</sup>F**

## SUPPORTING INFORMATION

**<sup>1</sup>H NMR** (471 MHz, DMSO-*d*<sub>6</sub>): δ/ppm = -77.7 (CF<sub>3</sub>). **IR** (ATR):  $\tilde{\nu}/\text{cm}^{-1}$  = 3041, 1676, 1607, 1477, 1251, 1149, 1027, 953, 834, 796, 724. **HRMS** (ESI) calculated for C<sub>12</sub>H<sub>20</sub>N<sup>+</sup> [M-OTf]<sup>+</sup>: 178.1590; found: 178.1588.

**(*R*)-*N,N,N*-Trimethyl-1-(*m*-tolyl)ethan-1-aminium trifluoromethanesulfonate [(*R*)-**1c**]**. Prepared from (*R*)-*N,N*-dimethyl-1-(*m*-tolyl)-ethan-1-amine (160 mg, 0.980 mmol, 1.00 equiv) according to **GP1**, using MeOTf (0.14 mL, 1.2 mmol, 1.2 equiv). Vacuum filtration and subsequent rinsing of the precipitate with Et<sub>2</sub>O (3 × 5 mL) afforded the title compound (*R*)-**1c** (284 mg, 0.868 mmol, 89%) as a white powder.

**Optical rotation**: [α] = +5.63 (*c* = 1.00, CHCl<sub>3</sub>, 98% ee). The enantiomeric excess of (*R*)-**1c** was determined at the stage of the 4-nitrobenzoyl amide (See Ch9 for HPLC traces). HPLC analysis on a chiral stationary phase (Daicel Chiralcel IA column, column temperature 20 °C, solvent *n*-heptane:isopropanol = 80:20, flow rate 1 mL/min, λ = 210 nm): *t*<sub>R</sub> = 7.2 min for (*S*)-**1c**, *t*<sub>R</sub> = 8.8 min for (*R*)-**1c**.

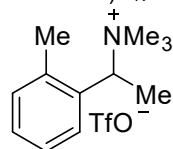**1d**

C<sub>13</sub>H<sub>20</sub>F<sub>3</sub>NO<sub>3</sub>S  
M = 327.36 g/mol

***N,N,N*-Trimethyl-1-(*o*-tolyl)ethan-1-aminium trifluoromethanesulfonate (**1d**)**. Prepared from *N,N*-dimethyl-1-(*o*-tolyl)ethan-1-amine (313 mg, 1.92 mmol, 1.00 equiv) according to **GP1**, using MeOTf (0.26 mL, 2.3 mmol, 1.2 equiv). Vacuum filtration and subsequent rinsing of the precipitate with Et<sub>2</sub>O (3 × 10 mL) afforded the title compound **1d** (541 mg, 1.65 mmol, 86%) as a white powder. **<sup>1</sup>H NMR** (400 MHz, DMSO-*d*<sub>6</sub>): δ/ppm = 1.68 (d, *J* = 6.9 Hz, 3H), 2.45 (s, 3H), 3.00 (s, 9H), 5.00 (q, *J* = 6.9 Hz, 1H), 7.31–7.41 (m, 3H), 7.58–7.65 (m, 1H). **<sup>13</sup>C {<sup>1</sup>H} NMR** (101 MHz, DMSO-*d*<sub>6</sub>): δ/ppm = 15.6, 19.9, 50.4 (t, *J* = 3.8 Hz, [H<sub>3</sub>C]<sub>3</sub>N), 68.2, 121.2 (q, *J* = 322 Hz, CF<sub>3</sub>), 126.4, 128.9, 129.7, 131.4, 132.2, 138.5. **<sup>19</sup>F {<sup>1</sup>H} NMR** (471 MHz, DMSO-*d*<sub>6</sub>): δ/ppm = -77.7 (CF<sub>3</sub>). **IR** (ATR):  $\tilde{\nu}/\text{cm}^{-1}$  = 3035, 2980, 1480, 1251, 1142, 1027, 956, 842, 771, 734. **HRMS** (ESI) calculated for C<sub>12</sub>H<sub>20</sub>N<sup>+</sup> [M-OTf]<sup>+</sup>: 178.1590; found: 178.1588. The spectroscopic data are in accordance with those reported.<sup>[S7]</sup>

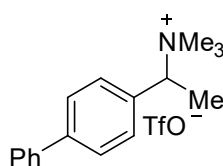**1e**

C<sub>18</sub>H<sub>22</sub>F<sub>3</sub>NO<sub>3</sub>S  
M = 389.43 g/mol

**1-([1,1'-Biphenyl]-4-yl)-*N,N,N*-trimethylethan-1-aminium trifluoromethanesulfonate (**1e**)**. Prepared from 1-([1,1'-biphenyl]-4-yl)-*N,N*-dimethylethan-1-amine (335 mg, 1.49 mmol, 1.00 equiv) according to **GP1**, using MeOTf (0.20 mL, 1.8 mmol, 1.2 equiv). Vacuum filtration and subsequent rinsing of the precipitate with Et<sub>2</sub>O (3 × 10 mL) afforded the title compound **1e** (523 mg, 1.34 mmol, 90%) as a white powder. **<sup>1</sup>H NMR** (400 MHz, DMSO-*d*<sub>6</sub>): δ/ppm = 1.75 (d, *J* = 7.0 Hz, 3H), 3.02 (s, 9H), 4.82 (q, *J* = 7.0 Hz, 1H), 7.38–7.45 (m, 1H), 7.46–7.54 (m, 2H), 7.66–7.76 (m, 4H), 7.77–7.84 (m, 2H). **<sup>13</sup>C {<sup>1</sup>H} NMR** (101 MHz, DMSO-*d*<sub>6</sub>): δ/ppm = 14.5, 50.5, 72.3, 120.7 (q, *J* = 320 Hz, CF<sub>3</sub>), 126.8, 127.0, 128.0, 129.1, 131.1, 132.5, 139.0, 141.7. **<sup>19</sup>F {<sup>1</sup>H} NMR** (471 MHz, DMSO-*d*<sub>6</sub>): δ/ppm = -77.7 (CF<sub>3</sub>). **IR** (ATR):  $\tilde{\nu}/\text{cm}^{-1}$  = 3036, 2306, 2106, 1484, 1255, 1153, 1028, 956, 836, 756, 699. **HRMS** (ESI) calculated for C<sub>17</sub>H<sub>22</sub>N<sup>+</sup> [M-OTf]<sup>+</sup>: 240.1747 found: 240.1745. The spectroscopic data are in accordance with those reported.<sup>[S8]</sup>

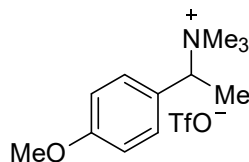**1f**

C<sub>13</sub>H<sub>20</sub>F<sub>3</sub>NO<sub>4</sub>S  
M = 343.36 g/mol

**1-(4-Methoxyphenyl)-*N,N,N*-trimethylethan-1-aminium trifluoromethanesulfonate (**1f**)**. Prepared from 1-(4-methoxyphenyl)-*N,N*-dimethylethan-1-amine (1.36 mL, 7.28 mmol, 1.00 equiv) according to **GP1**, using MeOTf (1.0 mL, 9.0 mmol, 1.2 equiv). Vacuum filtration and subsequent rinsing of the precipitate with Et<sub>2</sub>O (3 × 10 mL) afforded the title compound **1f** (2.259 g, 6.579 mmol, 90%) as a white powder. **<sup>1</sup>H NMR** (500 MHz, DMSO-*d*<sub>6</sub>): δ/ppm = 1.68 (d, *J* = 7.0 Hz, 3H), 2.94 (s, 9H), 3.80 (s, 3H), 4.70 (q, *J* = 7.0 Hz, 1H), 7.00–7.07 (m, 2H), 7.48–7.55 (m, 2H). **<sup>13</sup>C {<sup>1</sup>H} NMR** (126 MHz, DMSO-*d*<sub>6</sub>): δ/ppm = 14.6, 50.2 (t, *J* = 3.9 Hz, [H<sub>3</sub>C]<sub>3</sub>N), 72.3, 114.1, 120.1 (q, *J* = 322 Hz, CF<sub>3</sub>), 125.3, 131.9, 160.4. **<sup>19</sup>F {<sup>1</sup>H} NMR** (471 MHz, DMSO-*d*<sub>6</sub>): δ/ppm = -77.7 (CF<sub>3</sub>). **IR** (ATR):  $\tilde{\nu}/\text{cm}^{-1}$  = 2323, 2130, 1883, 1519, 1249, 1158, 1032, 838, 764. **HRMS** (ESI) calculated for C<sub>12</sub>H<sub>20</sub>NO<sup>+</sup> [M-OTf]<sup>+</sup>: 194.1539; found: 194.1534. The spectroscopic data are in accordance with those reported.<sup>[S9]</sup>



## SUPPORTING INFORMATION

**(S)-1-(4-Methoxyphenyl)-N,N,N-trimethylethan-1-aminium trifluoromethanesulfonate [(S)-1f].** Prepared from (S)-1-(4-methoxyphenyl)-N,N-dimethylethan-1-amine (300 mg, 1.67 mmol, 1.00 equiv) according to **GP1**, using MeOTf (0.21 mL, 1.8 mmol, 1.1 equiv). Vacuum filtration and subsequent rinsing of the precipitate with Et<sub>2</sub>O (3 × 5 mL) afforded the title compound (S)-**1f** (540 mg, 1.67 mmol, 93%) as a white powder. **Optical rotation:** [α] = -28.7 (c = 1.00, CHCl<sub>3</sub>, 98% ee). The enantiomeric excess was indicated by a label on the bottle of the corresponding amine.

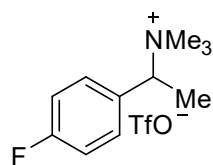**1g**

C<sub>12</sub>H<sub>17</sub>F<sub>4</sub>NO<sub>3</sub>S  
M = 331.33 g/mol

**1-(4-Fluorophenyl)-N,N,N-trimethylethan-1-aminium trifluoromethanesulfonate (1g).** Prepared from 1-(4-fluorophenyl)-N,N-dimethylethan-1-amine (397 mg, 2.37 mmol, 1.00 equiv) according to **GP1**, using MeOTf (0.32 mL, 2.9 mmol, 1.2 equiv). Vacuum filtration and subsequent rinsing of the precipitate with Et<sub>2</sub>O (3 × 10 mL) afforded the title compound **1g** (722 mg, 2.18 mmol, 92%) as a white powder. **<sup>1</sup>H NMR** (500 MHz, DMSO-*d*<sub>6</sub>): δ/ppm = 1.70 (d, *J* = 7.0 Hz, 3H), 2.97 (s, 9H), 4.79 (q, *J* = 7.0 Hz, 1H), 7.30–7.38 (m, 2H), 7.62–7.70 (m, 2H). **<sup>13</sup>C {<sup>1</sup>H} NMR** (126 MHz, DMSO-*d*<sub>6</sub>): δ/ppm = 14.6, 50.4 (t, *J* = 3.5 Hz, [H<sub>3</sub>C]<sub>3</sub>N), 71.8, 115.8 (d, *J* = 21 Hz), 120.7 (q, *J* = 322 Hz, CF<sub>3</sub>), 129.8 (d, *J* = 3.5 Hz), 132.8, 162.9 (d, *J* = 248 Hz). **<sup>19</sup>F {<sup>1</sup>H} NMR** (471 MHz, DMSO-*d*<sub>6</sub>): δ/ppm = -111.1 (CF), -77.7 (CF<sub>3</sub>). **IR** (ATR):  $\tilde{\nu}$ /cm<sup>-1</sup> = 3579, 2313, 2099, 1920, 1609, 1516, 1491, 1234, 1159, 1066, 1025, 954, 839, 756, 699. **HRMS** (ESI) calculated for C<sub>11</sub>H<sub>17</sub>FN<sup>+</sup> [M-OTf]<sup>+</sup>: 182.1340; found: 182.1337. The spectroscopic data are in accordance with those reported.<sup>[S8]</sup>

**(R)-1-(4-Fluorophenyl)-N,N,N-trimethylethan-1-aminium trifluoromethanesulfonate [(R)-1g].** Prepared from (R)-1-(4-fluorophenyl)-N,N-dimethylethan-1-amine (200 mg, 1.20 mmol, 1.00 equiv) according to **GP1**, using MeOTf (0.15 mL, 1.4 mmol, 1.2 equiv). Vacuum filtration and subsequent rinsing of the precipitate with Et<sub>2</sub>O (3 × 5 mL) afforded the title compound (R)-**1g** (371 mg, 1.11 mmol, 93%) as a white powder. **Optical rotation:** [α] = +17.3 (c = 1.00, CHCl<sub>3</sub>, 98% ee). The enantiomeric excess was indicated by a label on the bottle of the corresponding amine.

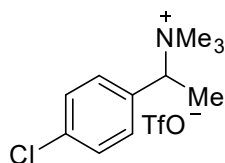**1h**

C<sub>12</sub>H<sub>17</sub>ClF<sub>3</sub>NO<sub>3</sub>S  
M = 347.78 g/mol

**1-(4-Chlorophenyl)-N,N,N-trimethylethan-1-aminium trifluoromethanesulfonate (1h).** Prepared from 1-(4-chlorophenyl)-N,N-dimethylethan-1-amine (400 mg, 2.18 mmol, 1.00 equiv) according to **GP1**, using MeOTf (0.43 mL, 4.1 mmol, 1.9 equiv). Vacuum filtration and subsequent rinsing of the precipitate with Et<sub>2</sub>O (3 × 10 mL) afforded the title compound **1h** (725 mg, 2.09 mmol, 96%) as an off-white powder. **<sup>1</sup>H NMR** (700 MHz, DMSO-*d*<sub>6</sub>): δ/ppm = 1.70 (d, *J* = 7.0 Hz, 3H), 2.97 (s, 9H), 4.70 (q, *J* = 7.0 Hz, 1H), 7.56–7.59 (m, 2H), 7.61–7.65 (m, 2H). **<sup>13</sup>C {<sup>1</sup>H} NMR** (126 MHz, DMSO-*d*<sub>6</sub>): δ/ppm = 14.4, 50.5, 71.7, 120.7 (q, *J* = 322 Hz, CF<sub>3</sub>), 128.9, 132.3, 132.4, 135.0. **<sup>19</sup>F {<sup>1</sup>H} NMR** (659 MHz, DMSO-*d*<sub>6</sub>): δ/ppm = -77.7 (CF<sub>3</sub>). **IR** (ATR):  $\tilde{\nu}$ /cm<sup>-1</sup> = 3035, 2290, 2092, 1915, 1596, 1491, 1256, 1153, 1028, 954, 832, 755. **HRMS** (ESI) calculated for C<sub>11</sub>H<sub>17</sub>ClN<sup>+</sup> [M-OTf]<sup>+</sup>: 198.1044; found: 198.1044.

**(S)-1-(4-Chlorophenyl)-N,N,N-trimethylethan-1-aminium trifluoromethanesulfonate [(S)-1h].** Prepared from (S)-1-(4-chlorophenyl)-N,N-dimethylethan-1-amine (422 mg, 2.30 mmol, 1.00 equiv) according to **GP1**, using MeOTf (0.31 mL, 2.8 mmol, 1.2 equiv). Vacuum filtration and subsequent rinsing of the precipitate with Et<sub>2</sub>O (3 × 10 mL) afforded the title compound **1h** (745 mg, 2.14 mmol, 97%) as a white powder. **Optical rotation:** [α] = -23.6 (c = 1.00, CHCl<sub>3</sub>, 98% ee). The enantiomeric excess was indicated by a label on the bottle of the corresponding amine.

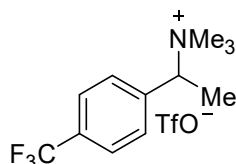**1i**

C<sub>13</sub>H<sub>17</sub>F<sub>6</sub>NO<sub>3</sub>S  
M = 381.33 g/mol

**N,N,N-Trimethyl-1-[4-(trifluoromethyl)phenyl]ethan-1-aminium trifluoromethanesulfonate (1i).** Prepared from N,N-dimethyl-1-[4-(trifluoromethyl)phenyl]ethan-1-amine (357 mg, 1.64 mmol, 1.00 equiv) according to **GP1**, using MeOTf (125 μL, 1.97 mmol, 1.20 equiv).

## SUPPORTING INFORMATION

Vacuum filtration and subsequent rinsing of the precipitate with Et<sub>2</sub>O (3 × 10 mL) afforded the title compound **1i** (480 mg, 1.26 mmol, 77%) as a white powder. <sup>1</sup>H NMR (400 MHz, DMSO-*d*<sub>6</sub>): δ/ppm = 1.74 (d, *J* = 6.9 Hz, 3H), 3.01 (s, 9H), 4.89 (q, *J* = 6.9 Hz, 1H), 7.79–7.92 (m, 4H). <sup>13</sup>C {<sup>1</sup>H} NMR (126 MHz, DMSO-*d*<sub>6</sub>): δ/ppm = 14.4, 50.7, 71.8, 120.7 (q, *J* = 322 Hz, CF<sub>3</sub>), 123.9 (q, *J* = 273 Hz, CF<sub>3</sub>), 125.8 (q, *J* = 4.0 Hz), 130.4 (q, *J* = 32.0 Hz), 131.5, 138.0. <sup>19</sup>F {<sup>1</sup>H} NMR (471 MHz, DMSO-*d*<sub>6</sub>): δ/ppm = –77.7 (CF<sub>3</sub>). IR (ATR):  $\tilde{\nu}/\text{cm}^{-1}$  = 1621, 1475, 1328, 1251, 1160, 1070, 1028, 951, 844, 756, 700. HRMS (ESI) calculated for C<sub>12</sub>H<sub>17</sub>F<sub>3</sub>N<sup>+</sup> [M–OTf]<sup>+</sup>: 232.1308; found: 232.1305.

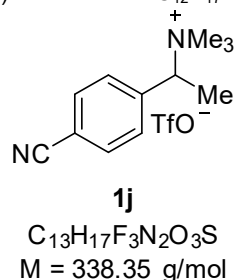

**1-(4-Cyanophenyl)-N,N,N-trimethylethan-1-aminium trifluoromethanesulfonate (1j).** Prepared from 4-(1-(dimethylamino)ethyl)benzotrile (470 mg, 2.70 mmol, 1.00 equiv) according to **GP1**, using MeOTf (367  $\mu$ L, 3.24 mmol, 1.20 equiv). Vacuum filtration and subsequent rinsing of the precipitate with Et<sub>2</sub>O (3 × 10 mL) afforded the title compound **1j** (754 mg, 2.23 mmol, 83%) as a white powder. <sup>1</sup>H NMR (500 MHz, DMSO-*d*<sub>6</sub>): δ/ppm = 1.73 (d, *J* = 7.0 Hz, 3H), 3.00 (s, 9H), 4.86 (q, *J* = 7.0 Hz, 1H), 7.77–7.86 (m, 2H), 7.96–8.02 (m, 2H). <sup>13</sup>C {<sup>1</sup>H} NMR (126 MHz, DMSO-*d*<sub>6</sub>): δ/ppm = 14.3, 50.7, 71.8, 112.9, 118.2, 120.7 (q, *J* = 322 Hz, CF<sub>3</sub>), 131.5, 132.7, 138.5. <sup>19</sup>F {<sup>1</sup>H} NMR (471 MHz, DMSO-*d*<sub>6</sub>): δ/ppm = –77.8 (CF<sub>3</sub>). IR (ATR):  $\tilde{\nu}/\text{cm}^{-1}$  = 2227, 1490, 1422, 1259, 1150, 1063, 1029, 964, 845, 690. HRMS (ESI) calculated for C<sub>12</sub>H<sub>17</sub>N<sub>2</sub><sup>+</sup> [M–OTf]<sup>+</sup>: 189.1386; found: 189.1385.

**(R)-1-(4-Cyanophenyl)-N,N,N-trimethylethan-1-aminium trifluoromethanesulfonate [(R)-1j].** Prepared from (*R*)-4-(1-(dimethylamino)ethyl)benzotrile (178 mg, 1.02 mmol, 1.00 equiv) according to **GP1**, using MeOTf (0.14  $\mu$ L, 1.2 mmol, 1.2 equiv). Vacuum filtration and subsequent rinsing of the precipitate with Et<sub>2</sub>O (3 × 5 mL) afforded the title compound (*R*)-**1j** (312 mg, 0.922 mmol, 90%) as an off-white powder. **Optical rotation:** [ $\alpha$ ] = –17.0 (*c* = 0.10, CHCl<sub>3</sub>, 97% ee). The enantiomeric excess of (*R*)-**1j** could only reliably be determined after silylation. Derivatization of the free amine to the 4-nitrobenzoyl amide led to partial racemization (e.r. = 95:5, see Ch9). HPLC analysis on a chiral stationary phase (Daicel Chiralcel OD-H column, column temperature 20 °C, solvent *n*-heptane:isopropanol = 99.5:0.5, flow rate 0.8 mL/min,  $\lambda$  = 210 nm): *t*<sub>R</sub> = 9.8 min for (*R*)-**1j**, *t*<sub>R</sub> = 10.9 min for (*S*)-**1j**.

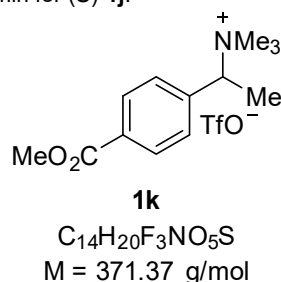

**1-[4-(Methoxycarbonyl)phenyl]-N,N,N-trimethylethan-1-aminium trifluoromethanesulfonate (1k).** Prepared from 4-(1-(dimethylamino)ethyl)benzotrile (420 mg, 2.03 mmol, 1.00 equiv) according to **GP1**, using MeOTf (0.25 mL, 2.2 mmol, 1.1 equiv). Vacuum filtration and subsequent rinsing of the precipitate with Et<sub>2</sub>O (3 × 10 mL) afforded the title compound **1k** (730 mg, 1.97 mmol, 97%) as a white powder. <sup>1</sup>H NMR (500 MHz, DMSO-*d*<sub>6</sub>): δ/ppm = 1.74 (d, *J* = 7.0 Hz, 3H), 3.00 (s, 9H), 3.88 (s, 3H), 4.86 (q, *J* = 7.0 Hz, 1H), 7.72–7.79 (m, 2H), 8.03–8.08 (m, 2H). <sup>13</sup>C {<sup>1</sup>H} NMR (126 MHz, DMSO-*d*<sub>6</sub>): δ/ppm = 14.4, 50.6, 52.4, 71.9, 120.7 (q, *J* = 322 Hz, CF<sub>3</sub>), 129.5, 131.0, 131.1, 138.4, 165.7. <sup>19</sup>F {<sup>1</sup>H} NMR (659 MHz, DMSO-*d*<sub>6</sub>): δ/ppm = –77.8 (CF<sub>3</sub>). IR (ATR):  $\tilde{\nu}/\text{cm}^{-1}$  = 3042, 2959, 2300, 2106, 1716, 1475, 1438, 1253, 1144, 1027, 959, 847, 776, 716. HRMS (ESI) calculated for C<sub>13</sub>H<sub>20</sub>NO<sub>2</sub><sup>+</sup> [M–OTf]<sup>+</sup>: 222.1489; found: 222.1489.

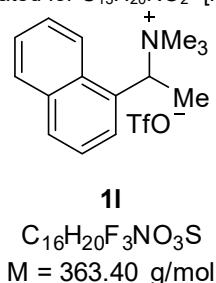

**N,N,N-Trimethyl-1-(naphthalen-1-yl)ethan-1-aminium trifluoromethanesulfonate (1l).** Prepared from *N,N*-dimethyl-1-(naphthalen-1-yl)ethan-1-amine (500 mg, 2.51 mmol, 1.00 equiv) according to **GP1**, using MeOTf (0.40 mL, 3.5 mmol, 1.4 equiv). During the reaction, no precipitate, but a second liquid layer was formed. Purification by flash column chromatography on silica gel (MeOH:CH<sub>2</sub>Cl<sub>2</sub> = 1:19 → 1:9) afforded the title compound **1l** (733 mg, 2.02 mmol, 80%) as a white powder. *R*<sub>f</sub> = 0.25 (MeOH:CH<sub>2</sub>Cl<sub>2</sub> = 1:9). **M.P.** = 77–80 °C (MeOH:CH<sub>2</sub>Cl<sub>2</sub> = 1:9). <sup>1</sup>H NMR (400 MHz, DMSO-*d*<sub>6</sub>): δ/ppm = 1.84 (d, *J* = 6.8 Hz, 3H), 3.04 (s, 9H), 5.76 (q, *J* = 6.8 Hz, 1H), 7.59–7.73 (m, 3H), 7.92–7.98 (m, 1H), 8.03–8.08 (m, 1H), 8.09–8.14 (m, 1H), 8.55–8.62 (m, 1H). <sup>13</sup>C {<sup>1</sup>H} NMR (101 MHz, DMSO-*d*<sub>6</sub>): δ/ppm = 15.8, 50.6, 66.1, 120.7 (q,

## SUPPORTING INFORMATION

$J = 322$  Hz,  $CF_3$ ), 123.3, 125.3, 126.2, 127.3, 128.4, 129.2, 129.8, 130.8, 132.2, 133.5.  $^{19}F$  { $^1H$ } NMR (471 MHz, DMSO- $d_6$ ):  $\delta/ppm = -77.7$  ( $CF_3$ ). IR (ATR):  $\tilde{\nu}/cm^{-1} = 3038, 1484, 1394, 1247, 1154, 1026, 951, 857, 830, 780$ . HRMS (ESI) calculated for  $C_{15}H_{20}N^+$  [M-OTf] $^+$ : 214.1590; found: 214.1588. The spectroscopic data are in accordance with those reported.<sup>[S8]</sup>

**(*R*)-*N,N,N*-Trimethyl-1-(naphthalen-1-yl)ethan-1-aminium trifluoromethanesulfonate [(*R*)-**1l**]**. Prepared from (*R*)-*N,N*-dimethyl-1-(naphthalene-1-yl)ethan-1-amine (500 mg, 2.51 mmol, 1.00 equiv) according to **GP1**, using MeOTf (0.40 mL, 3.5 mmol, 1.4 equiv). During the reaction, no precipitate, but a second liquid layer was formed. Purification by flash column chromatography on silica gel (MeOH:CH<sub>2</sub>Cl<sub>2</sub> = 1:19 → 1:9) afforded the title compound (*R*)-**1l** (699 mg, 1.93 mmol, 77%) as a white-pink powder. **Optical rotation**:  $[\alpha] = -43.9$  ( $c = 1.00$ , CHCl<sub>3</sub>, 99% ee). The enantiomeric excess was indicated by a label on the bottle of the corresponding amine.

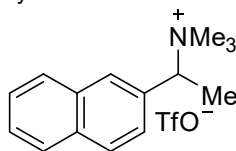**1m**

$C_{16}H_{20}F_3NO_3S$   
M = 363.40 g/mol

***N,N,N*-Trimethyl-1-(naphthalen-2-yl)ethan-1-aminium trifluoromethanesulfonate (1m)**. Prepared from *N,N*-dimethyl-1-(naphthalen-2-yl)ethan-1-amine (500 mg, 2.51 mmol, 1.00 equiv) according to **GP1**, using MeOTf (0.34 mL, 3.0 mmol, 1.2 equiv). During the reaction, no precipitate, but a second liquid layer was formed. The layer was washed with Et<sub>2</sub>O (2 × 5 mL) and cyclohexane (1 × 5 mL). Then the waxy solid was covered with cyclohexane and subjected to an ultrasonic bath for 5 min. During this time, the product solidified and the solvent was removed with a pipette. Drying of the residue at oil pump vacuum at rt afforded the title compound **1m** (734 mg, 2.03 mmol, 81%) as a white powder. **M.P.** = 56–59 °C (cyclohexane).  $^1H$  NMR (400 MHz, DMSO- $d_6$ ):  $\delta/ppm = 1.82$  (d,  $J = 6.6$  Hz, 3H), 3.04 (s, 9H), 4.94 (q,  $J = 6.9$  Hz, 1H), 7.58–7.66 (m, 2H), 7.67–7.74 (m, 1H), 7.95–8.08 (m, 3H), 8.15–8.22 (m, 1H).  $^{13}C$  { $^1H$ } NMR (101 MHz, DMSO- $d_6$ ):  $\delta/ppm = 14.7, 50.6, 72.8, 120.7$  (q,  $J = 322$  Hz,  $CF_3$ ), 126.8, 127.2, 127.4, 127.6, 128.4 (2C), 130.6, 130.9, 132.4, 133.4.  $^{19}F$  { $^1H$ } NMR (471 MHz, DMSO- $d_6$ ):  $\delta/ppm = -77.7$  ( $CF_3$ ). IR (ATR):  $\tilde{\nu}/cm^{-1} = 3040, 2297, 2112, 1623, 1481, 1412, 1248, 1153, 1027, 955, 828, 750$ . HRMS (ESI) calculated for  $C_{15}H_{20}N^+$  [M-OTf] $^+$ : 214.1590; found: 214.1588. The spectroscopic data are in accordance with those reported.<sup>[S8]</sup>

**(*R*)-*N,N,N*-Trimethyl-1-(naphthalen-2-yl)ethan-1-aminium trifluoromethanesulfonate [(*R*)-**1m**]**. Prepared from *N,N*-dimethyl-1-(naphthalen-2-yl)ethan-1-amine (500 mg, 2.51 mmol, 1.00 equiv) according to **GP1**, using MeOTf (0.34 mL, 3.0 mmol, 1.2 equiv). During the reaction, no precipitate, but a second liquid layer was formed. The layer was washed with Et<sub>2</sub>O (2 × 5 mL) and cyclohexane (1 × 5 mL). Then the waxy solid was covered with cyclohexane and subjected to an ultrasonic bath for 5 min. During this time, the product solidified and the solvent was removed with a pipette. Drying of the residue at oil pump vacuum at rt afforded the title compound (*R*)-**1m** (808 mg, 2.23 mmol, 89%) as a white powder. **Optical rotation**:  $[\alpha] = +14.4$  ( $c = 1.00$ , CHCl<sub>3</sub>, 99% ee). The enantiomeric excess was indicated by a label on the bottle of the corresponding amine.

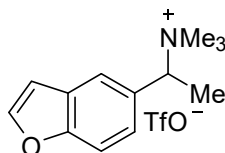**1n**

$C_{14}H_{18}F_3NO_4S$   
M = 353.36 g/mol

**1-(Benzofuran-5-yl)-*N,N,N*-trimethylethan-1-aminium trifluoromethanesulfonate (1n)**. Prepared from 1-(benzofuran-5-yl)-*N,N,N*-dimethylethan-1-amine (263 mg, 1.39 mmol, 1.00 equiv) according to **GP1**, using MeOTf (0.19 mL, 1.7 mmol, 1.2 equiv). During the reaction, no precipitate, but a second liquid layer was formed. Purification of the bottom layer by flash column chromatography on silica gel (MeOH:CH<sub>2</sub>Cl<sub>2</sub> = 1:9) afforded the title compound **1n** (808 mg, 2.23 mmol, 89%) as a colorless waxy residue, which slowly solidified.  $R_f = 0.24$  (MeOH:CH<sub>2</sub>Cl<sub>2</sub> = 1:9). **M.P.** = 46–47 °C (MeOH:CH<sub>2</sub>Cl<sub>2</sub> = 1:9).  $^1H$  NMR (500 MHz, DMSO- $d_6$ ):  $\delta/ppm = 1.77$  (d,  $J = 6.7$  Hz, 3H), 3.00 (s, 9H), 4.89 (q,  $J = 6.9$  Hz, 1H), 7.04 (d,  $J = 1.2$  Hz, 1H), 7.53 (d,  $J = 8.4$  Hz, 1H), 7.72 (d,  $J = 8.6$  Hz, 1H), 7.93 (s, 1H), 8.09 (d,  $J = 2.0$  Hz, 1H).  $^{13}C$  { $^1H$ } NMR (126 MHz, DMSO- $d_6$ ):  $\delta/ppm = 15.0, 50.4$  (t,  $J = 3.6$  Hz, [H<sub>3</sub>C]<sub>3</sub>N), 72.7, 107.0, 111.6, 120.7 (q,  $J = 322$  Hz,  $CF_3$ ), 123.7, 126.8, 127.6, 128.2, 147.3, 154.8.  $^{19}F$  { $^1H$ } NMR (471 MHz, DMSO- $d_6$ ):  $\delta/ppm = -77.7$  ( $CF_3$ ). IR (ATR):  $\tilde{\nu}/cm^{-1} = 3511, 3116, 1612, 1471, 1253, 1156, 1026, 950, 902, 836$ . HRMS (ESI) calculated for  $C_{13}H_{18}NO^+$  [M-OTf] $^+$ : 204.1383; found: 204.1382. The spectroscopic data are in accordance with those reported.<sup>[S9]</sup>

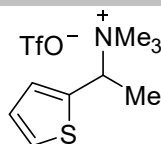**1o**

$C_{10}H_{16}F_3NO_3S_2$   
 M = 319.36 g/mol

***N,N,N*-Trimethyl-1-(thiophen-2-yl)ethan-1-aminium trifluoromethanesulfonate (1o).** Prepared from *N,N*-dimethyl-1-(thiophen-2-yl)ethan-1-amine (144 mg, 0.928 mmol, 1.00 equiv) according to **GP1**, using MeOTf (0.12 mL, 1.1 mmol, 1.2 equiv). During the reaction, no precipitate, but a second liquid layer was formed. Purification of the bottom layer by flash column chromatography on silica gel (MeOH:CH<sub>2</sub>Cl<sub>2</sub> = 1:9) afforded the title compound **1o** (212 mg, 0.664 mmol, 72%) as a colorless waxy residue, which did not solidify even at low temperatures (−30 °C, freezer). *R<sub>f</sub>* = 0.14 (MeOH:CH<sub>2</sub>Cl<sub>2</sub> = 1:9). <sup>1</sup>H NMR (500 MHz, DMSO-*d*<sub>6</sub>): δ/ppm = 1.74 (d, *J* = 7.0 Hz, 3H), 3.02 (s, 9H), 5.12 (q, *J* = 7.0 Hz, 1H), 7.18 (dd, *J* = 5.1 Hz, 3.5 Hz, 1H), 7.46 (dd, *J* = 3.5 Hz, 0.88 Hz, 1H), 7.79 (dd, *J* = 5.1 Hz, 0.88 Hz, 1H). <sup>13</sup>C {<sup>1</sup>H} NMR (126 MHz, DMSO-*d*<sub>6</sub>): δ/ppm = 16.5, 50.3 (t, *J* = 3.2 Hz, [H<sub>3</sub>C]<sub>3</sub>N), 67.8, 120.7 (q, *J* = 322 Hz, CF<sub>3</sub>), 127.5, 129.2, 131.7, 135.5. <sup>19</sup>F {<sup>1</sup>H} NMR (569 MHz, DMSO-*d*<sub>6</sub>): δ/ppm = −77.7 (CF<sub>3</sub>). IR (ATR):  $\tilde{\nu}/\text{cm}^{-1}$  = 2312, 2112, 1604, 1487, 1249, 1159, 1029, 955, 831, 712. HRMS (ESI) calculated for C<sub>9</sub>H<sub>16</sub>NS<sup>+</sup> [M-OTf]<sup>+</sup>: 170.0998; found: 170.0995.

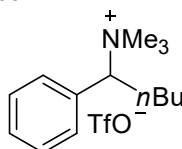**1p**

$C_{15}H_{24}F_3NO_3S$   
 M = 355.42 g/mol

***N,N,N*-Trimethyl-1-phenylpentan-1-aminium trifluoromethanesulfonate (1p).** Prepared from *N,N*-dimethyl-1-phenylpentan-1-amine (500 mg, 2.62 mmol, 1.00 equiv) according to **GP1**, using MeOTf (0.35 mL, 3.1 mmol, 1.2 equiv). During the reaction, no precipitate, but a second liquid layer was formed. The layer was washed with Et<sub>2</sub>O (2 × 5 mL) and cyclohexane (1 × 5 mL). Then the waxy solid was covered with cyclohexane and subjected to an ultrasonic bath for 5 min. During this time, no product solidified and the solvent was removed with a pipette. Drying of the residue at oil pump vacuum at rt afforded the title compound **1p** (513 mg, 1.44 mmol, 55%) as a colorless waxy residue, which did not solidify even at low temperatures (−30 °C, freezer). <sup>1</sup>H NMR (400 MHz, DMSO-*d*<sub>6</sub>): δ/ppm = 0.79 (t, *J* = 7.4 Hz, 3H), 0.77–0.87 (m, 1H), 0.92–1.04 (m, 1H), 1.18–1.38 (m, 1H), 2.15–2.27 (m, 2H), 2.97 (s, 9H), 4.53 (dd, *J* = 11.0 Hz, 4.6 Hz, 1H), 7.33–7.78 (m, 5H). <sup>13</sup>C {<sup>1</sup>H} NMR (101 MHz, DMSO-*d*<sub>6</sub>): δ/ppm = 13.6, 21.5, 26.1, 28.2, 50.9, 71.2, 120.7 (q, *J* = 322 Hz, CF<sub>3</sub>), 129.0, 129.6, 130.2, 131.7. <sup>19</sup>F {<sup>1</sup>H} NMR (471 MHz, DMSO-*d*<sub>6</sub>): δ/ppm = −77.7 (CF<sub>3</sub>). IR (ATR):  $\tilde{\nu}/\text{cm}^{-1}$  = 3052, 2959, 2866, 2102, 1987, 1675, 1467, 1252, 1155, 1024, 950, 854, 796, 732. HRMS (ESI) calculated for C<sub>14</sub>H<sub>24</sub>N<sup>+</sup> [M-OTf]<sup>+</sup>: 206.1903; found: 206.1900.

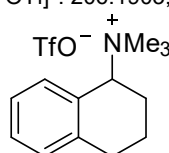**1q**

$C_{14}H_{20}F_3NO_3S$   
 M = 339.37 g/mol

***N,N,N*-Trimethyl-1,2,3,4-tetrahydronaphthalen-1-aminium trifluoromethanesulfonate (1q).** Prepared from *N,N*-dimethyl-1,2,3,4-tetrahydronaphthalen-1-amine (677 mg, 3.86 mmol, 1.00 equiv) according to **GP1**, using MeOTf (0.52 mL, 4.6 mmol, 1.2 equiv). Vacuum filtration and subsequent rinsing of the precipitate with Et<sub>2</sub>O (3 × 10 mL) afforded the title compound **1q** (508 mg, 1.50 mmol, 39%) as a white powder. **M.P.** 87–89 °C (Et<sub>2</sub>O). <sup>1</sup>H NMR (400 MHz, DMSO-*d*<sub>6</sub>): δ/ppm = 1.39–1.54 (m, 1H), 2.00–2.10 (m, 1H), 2.11–2.24 (m, 1H), 2.34–2.47 (m, 1H), 2.70–2.80 (m, 2H), 2.98 (s, 9H), 4.89 (dd, *J* = 8.3 Hz, 4.1 Hz, 1H), 7.28–7.35 (m, 2H), 7.40–7.46 (m, 1H), 7.47–7.51 (m, 1H). <sup>13</sup>C {<sup>1</sup>H} NMR (176 MHz, DMSO-*d*<sub>6</sub>): δ/ppm = 21.0, 22.8, 27.9, 50.6 (t, *J* = 3.4 Hz, [H<sub>3</sub>C]<sub>3</sub>N), 71.7, 120.7 (q, *J* = 322 Hz, CF<sub>3</sub>), 125.9, 127.0, 129.6, 130.1, 133.5, 142.7. <sup>19</sup>F {<sup>1</sup>H} NMR (659 MHz, DMSO-*d*<sub>6</sub>): δ/ppm = −77.7 (CF<sub>3</sub>). IR (ATR):  $\tilde{\nu}/\text{cm}^{-1}$  = 3040, 2943, 1484, 1248, 1149, 1028, 958, 881, 837, 753, 690. HRMS (ESI) calculated for C<sub>13</sub>H<sub>20</sub>N<sup>+</sup> [M-OTf]<sup>+</sup>: 190.1590; found: 190.1589. The spectroscopic data are in accordance with those reported.<sup>[S7]</sup>

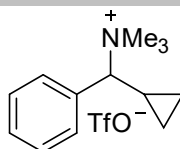**1r**

$C_{14}H_{20}F_3NO_3S$   
 M = 339.37 g/mol

**1-Cyclopropyl-*N,N,N*-trimethyl-1-phenylmethanaminium trifluoromethanesulfonate (1r).** Prepared from 1-cyclopropyl-*N,N*-dimethyl-1-phenylmethanamine (155 mg, 0.884 mmol, 1.00 equiv) according to **GP1**, using MeOTf (0.12 mL, 1.1 mmol, 1.2 equiv). Vacuum filtration and subsequent rinsing of the precipitate with Et<sub>2</sub>O (3 × 5 mL) afforded the title compound **1r** (252 mg, 0.743 mmol, 84%) as a white powder. **M.P.** 93–95 °C (Et<sub>2</sub>O). **<sup>1</sup>H NMR** (500 MHz, DMSO-*d*<sub>6</sub>): δ/ppm = –0.12–{–0.04} (m, 1H), 0.54–0.63 (m, 1H), 0.80–0.88 (m, 1H), 0.96–1.05 (m, 1H), 1.82–1.93 (m, 1H), 3.05 (s, 9H), 3.95 (d, *J* = 10.8 Hz, 1H), 7.37–7.72 (m, 5H). **<sup>13</sup>C {<sup>1</sup>H} NMR** (126 MHz, DMSO-*d*<sub>6</sub>): δ/ppm = 3.3, 10.0 (2C), 51.0 (t, *J* = 3.0 Hz, [H<sub>3</sub>C]<sub>3</sub>N), 80.8, 120.7 (q, *J* = 322 Hz, CF<sub>3</sub>), 128.7, 129.8, 130.9, 133.1. **<sup>19</sup>F {<sup>1</sup>H} NMR** (471 MHz, DMSO-*d*<sub>6</sub>): δ/ppm = –77.7 (CF<sub>3</sub>). **IR** (ATR):  $\tilde{\nu}/\text{cm}^{-1}$  = 3059, 1476, 1248, 1159, 1025, 970, 915, 857, 727. **HRMS** (ESI) calculated for C<sub>13</sub>H<sub>20</sub>N<sup>+</sup> [M–OTf]<sup>+</sup>: 190.1590; found: 190.1588. The spectroscopic data are in accordance with those reported.<sup>[S7]</sup>

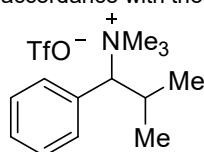**1s**

$C_{14}H_{22}F_3NO_3S$   
 M = 341.39 g/mol

***N,N,N,2*-Tetramethyl-1-phenylpropan-1-aminium trifluoromethanesulfonate (1s).** Prepared from *N,N,2*-trimethyl-1-phenylpropan-1-amine (200 mg, 1.13 mmol, 1.00 equiv) according to **GP1**, using MeOTf (0.14 mL, 1.3 mmol, 1.2 equiv). During the reaction, no precipitate, but a second liquid layer was formed. The layer was washed with Et<sub>2</sub>O (2 × 3 mL). Then the waxy solid was covered with cyclohexane and subjected to an ultrasonic bath for 5 min. During this time, no product solidified and the solvent was removed with a pipette. Drying of the residue at oil pump vacuum at rt afforded the title compound **1s** (230 mg, 0.674 mmol, 60%) as a colorless waxy residue, which solidified over 2 h. Both, <sup>1</sup>H NMR and <sup>13</sup>C NMR show minor impurities, which could not be identified. **M.P.** 44–46 °C (decomposition, Et<sub>2</sub>O). **<sup>1</sup>H NMR** (400 MHz, DMSO-*d*<sub>6</sub>): δ/ppm = 0.94 (dd, *J* = 10.6 Hz, 6.7 Hz, 6H), 2.79 (ds, *J* = 6.7 Hz, 4.4 Hz, 1H), 3.07 (s, 9H), 4.50 (d, *J* = 4.4 Hz, 1H), 7.30–7.77 (m, 5H). **<sup>13</sup>C {<sup>1</sup>H} NMR** (101 MHz, DMSO-*d*<sub>6</sub>): δ/ppm = 20.2, 23.0, 27.2, 52.5, 82.7, 120.7 (q, *J* = 322 Hz, CF<sub>3</sub>), 128.8, 129.8, 131.3, 133.7. **<sup>19</sup>F {<sup>1</sup>H} NMR** (471 MHz, DMSO-*d*<sub>6</sub>): δ/ppm = –77.7 (CF<sub>3</sub>). **IR** (ATR):  $\tilde{\nu}/\text{cm}^{-1}$  = 2973, 2106, 1473, 1252, 1152, 1025, 969, 854, 747, 708. **HRMS** (ESI) calculated for C<sub>13</sub>H<sub>22</sub>N<sup>+</sup> [M–OTf]<sup>+</sup>: 192.1747; found: 192.1746.

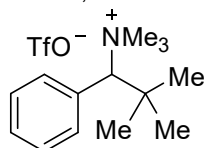**1t**

$C_{15}H_{24}F_3NO_3S$   
 M = 355.42 g/mol

***N,N,N,2,2*-Pentamethyl-1-phenylpropan-1-aminium trifluoromethanesulfonate (1t).** Prepared from *N,N,2,2*-tetramethyl-1-phenylpropan-1-amine (360 mg, 1.88 mmol, 1.00 equiv) according to **GP1**, using MeOTf (0.25 mL, 2.3 mmol, 1.2 equiv). During the reaction, no precipitate, but a second liquid layer was formed. The layer was washed with Et<sub>2</sub>O (2 × 5 mL). Then the waxy solid was covered with cyclohexane and subjected to an ultrasonic bath for 5 min. During this time, no product solidified and the solvent was removed with a pipette. Drying of the residue at oil pump vacuum at rt afforded the title compound **1t** (600 mg, 1.69 mmol, 90%) as a colorless waxy residue, which solidified very slowly. **M.P.** 43–45 °C (decomposition, Et<sub>2</sub>O). **<sup>1</sup>H NMR** (400 MHz, DMSO-*d*<sub>6</sub>): δ/ppm = 0.92 (s, 9H), 2.90 (s, 9H), 4.40 (s, 1H), 7.09–7.15 (m, 1H), 7.21–7.30 (m, 3H), 7.50–7.56 (m, 1H). **<sup>13</sup>C {<sup>1</sup>H} NMR** (101 MHz, DMSO-*d*<sub>6</sub>): δ/ppm = 30.6, 36.9, 54.7, 86.2, 120.7 (q, *J* = 322 Hz, CF<sub>3</sub>), 128.0, 128.5, 128.8, 129.6, 133.7, 134.1. **<sup>19</sup>F {<sup>1</sup>H} NMR** (659 MHz, DMSO-*d*<sub>6</sub>): δ/ppm = –77.7 (CF<sub>3</sub>). **IR** (ATR):  $\tilde{\nu}/\text{cm}^{-1}$  = 2976, 1626, 1483, 1415, 1249, 1170, 1022, 957, 853, 827, 739. **HRMS** (ESI) calculated for C<sub>14</sub>H<sub>24</sub>N<sup>+</sup> [M–OTf]<sup>+</sup>: 206.1903; found: 206.1903.

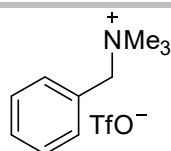**1u**

$C_{11}H_{16}F_3NO_3S$   
 M = 299.31 g/mol

***N,N,N*-Trimethyl-1-phenylmethanaminium trifluoromethanesulfonate (1u).** Prepared from *N,N*-dimethyl-1-phenylmethanamine (2.75 mL, 18.3 mmol, 1.00 equiv) according to **GP1**, using MeOTf (2.75 mL, 25.1 mmol, 1.4 equiv). Vacuum filtration and subsequent rinsing of the precipitate with Et<sub>2</sub>O (3 × 10 mL) afforded the title compound **1u** (5.04 g, 16.8 mmol, 92%) as a white powder. **M.P.** 72–74 °C (Et<sub>2</sub>O). **<sup>1</sup>H NMR** (500 MHz, DMSO-*d*<sub>6</sub>): δ/ppm = 3.02 (s, 9H), 4.51 (s, 2H), 7.48–7.57 (m, 5H). **<sup>13</sup>C {<sup>1</sup>H} NMR** (126 MHz, DMSO-*d*<sub>6</sub>): δ/ppm = 51.8 (t, *J* = 3.7 Hz, [H<sub>3</sub>C]<sub>3</sub>N), 67.9, 120.7 (q, *J* = 322 Hz, CF<sub>3</sub>), 128.3, 128.9, 130.3, 132.8. **<sup>19</sup>F {<sup>1</sup>H} NMR** (471 MHz, DMSO-*d*<sub>6</sub>): δ/ppm = –77.7 (CF<sub>3</sub>). **IR** (ATR):  $\tilde{\nu}/\text{cm}^{-1}$  = 1480, 1375, 1255, 1150, 1028, 989, 888, 779, 725. **HRMS** (ESI) calculated for C<sub>10</sub>H<sub>16</sub>N<sup>+</sup> [M–OTf]<sup>+</sup>: 150.1277; found: 150.1276. The spectroscopic data are in accordance with those reported.<sup>[S8]</sup>

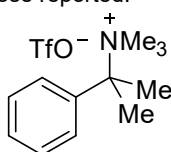**1v**

$C_{13}H_{20}F_3NO_3S$   
 M = 327.36 g/mol

***N,N,N*-Trimethyl-2-phenylpropan-2-aminium trifluoromethanesulfonate (1v).** Prepared from *N,N*-dimethyl-2-phenylpropan-2-amine (327 mg, 2.00 mmol, 1.00 equiv) according to **GP1**, using MeOTf (0.25 mL, 2.2 mmol, 1.1 equiv). Vacuum filtration and subsequent rinsing of the precipitate with Et<sub>2</sub>O (2 × 5 mL) afforded the title compound **1v** (594 mg, 1.81 mmol, 91%) as a white powder. **M.P.** 84–86 °C (Et<sub>2</sub>O). **<sup>1</sup>H NMR** (500 MHz, DMSO-*d*<sub>6</sub>): δ/ppm = 1.90 (s, 6H), 2.93 (s, 9H), 7.48–7.53 (m, 3H), 7.74–7.80 (m, 2H). **<sup>13</sup>C {<sup>1</sup>H} NMR** (126 MHz, DMSO-*d*<sub>6</sub>): δ/ppm = 22.5, 49.3 (t, *J* = 3.2 Hz, [H<sub>3</sub>C]<sub>3</sub>N), 74.4, 120.7 (q, *J* = 322 Hz, CF<sub>3</sub>), 128.4, 129.6, 129.7, 135.4. **<sup>19</sup>F {<sup>1</sup>H} NMR** (471 MHz, DMSO-*d*<sub>6</sub>): δ/ppm = –77.7 (CF<sub>3</sub>). **IR** (ATR):  $\tilde{\nu}/\text{cm}^{-1}$  = 1823, 1476, 1250, 1155, 1028, 965, 814, 756, 703. **HRMS** (ESI) calculated for C<sub>12</sub>H<sub>20</sub>N<sup>+</sup> [M–OTf]<sup>+</sup>: 178.1590; found: 178.1589. The spectroscopic data are in accordance with those reported.<sup>[S7]</sup>

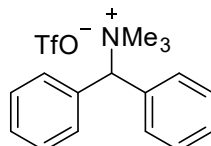**1w**

$C_{17}H_{20}F_3NO_3S$   
 M = 375.41 g/mol

***N,N,N*-Trimethyl-1,1-diphenylmethanaminium trifluoromethanesulfonate (1w).** Prepared from *N,N*-dimethyl-1,1-diphenylmethan-amine (500 mg, 2.37 mmol, 1.00 equiv) according to **GP1**, using MeOTf (0.32 mL, 2.8 mmol, 1.2 equiv). Vacuum filtration and subsequent rinsing of the precipitate with Et<sub>2</sub>O (2 × 5 mL) afforded the title compound **1w** (839 mg, 2.24 mmol, 94%) as a white powder. **M.P.** 126–128 °C (Et<sub>2</sub>O). **<sup>1</sup>H NMR** (500 MHz, DMSO-*d*<sub>6</sub>): δ/ppm = 3.08 (s, 9H), 5.92 (s, 1H), 7.50–7.56 (m, 6H), 7.84–7.92 (m, 4H). **<sup>13</sup>C {<sup>1</sup>H} NMR** (126 MHz, DMSO-*d*<sub>6</sub>): δ/ppm = 51.8, 80.6, 120.7 (q, *J* = 322 Hz, CF<sub>3</sub>), 129.3, 130.0, 130.9, 132.7. **<sup>19</sup>F {<sup>1</sup>H} NMR** (659 MHz, DMSO-*d*<sub>6</sub>): δ/ppm = –77.7 (CF<sub>3</sub>). **IR** (ATR):  $\tilde{\nu}/\text{cm}^{-1}$  = 1824, 1664, 1473, 1253, 1150, 1025, 962, 855, 740, 702. **HRMS** (ESI) calculated for C<sub>12</sub>H<sub>20</sub>N<sup>+</sup> [M–OTf]<sup>+</sup>: 226.1590; found: 226.1590. The spectroscopic data are in accordance with those reported.<sup>[S10]</sup>

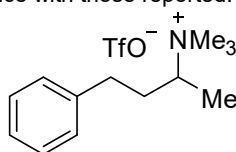**1x**

$C_{14}H_{22}F_3NO_3S$   
 M = 341.39 g/mol

## SUPPORTING INFORMATION

***N,N,N*-Trimethyl-4-phenylbutan-2-aminium trifluoromethanesulfonate (1x)**. Prepared from *N,N*-dimethyl-4-phenylbutan-2-amine (500 mg, 2.37 mmol, 1.00 equiv) according to **GP1**, using MeOTf (0.32 mL, 2.8 mmol, 1.2 equiv). During the reaction, no precipitate, but a second liquid layer was formed. The layer was washed with Et<sub>2</sub>O (2 × 5 mL). The waxy solid was covered with cyclohexane and subjected to an ultrasonic bath for 5 min. During this time, no product solidified and the solvent was removed with a pipette. Drying of the residue at oil pump vacuum at rt afforded the title compound **1x** (435 mg, 1.27 mmol, 89%) as a colorless waxy residue, which did not solidify even at low temperatures (−30 °C, freezer). **<sup>1</sup>H NMR** (400 MHz, DMSO-*d*<sub>6</sub>): δ/ppm = 1.34–1.41 (m, 3H), 1.62–1.75 (m, 1H), 2.19–2.30 (m, 1H), 2.52–2.60 (m, 1H), 2.69–2.79 (m, 1H), 2.99 (s, 9H), 3.35–3.45 (m, 1H), 7.19–7.26 (m, 1H), 7.27–7.35 (m, 4H). **<sup>13</sup>C {<sup>1</sup>H} NMR** (101 MHz, DMSO-*d*<sub>6</sub>): δ/ppm = 13.3, 31.0, 32.1, 50.1 (t, *J* = 3.8 Hz, [H<sub>3</sub>C]<sub>3</sub>N), 69.9, 120.7 (q, *J* = 322 Hz, CF<sub>3</sub>), 126.2, 128.3, 128.4, 140.5. **<sup>19</sup>F {<sup>1</sup>H} NMR** (471 MHz, DMSO-*d*<sub>6</sub>): δ/ppm = −77.7 (CF<sub>3</sub>). **IR** (ATR):  $\tilde{\nu}/\text{cm}^{-1}$  = 2123, 1818, 1476, 1251, 1149, 1027, 954, 848, 754, 701. **HRMS** (ESI) calculated for C<sub>13</sub>H<sub>22</sub>N<sup>+</sup> [M–OTf]<sup>+</sup>: 192.1747; found: 192.1746.

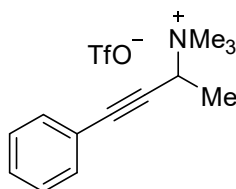**5**

C<sub>14</sub>H<sub>18</sub>F<sub>3</sub>NO<sub>3</sub>S  
M = 337.36 g/mol

***N,N,N*-Trimethyl-4-phenylbut-3-yn-2-aminium (5)**. Prepared from *N,N*-dimethyl-4-phenylbut-3-yn-2-amine (314 mg, 1.81 mmol, 1.00 equiv) according to **GP1**, using MeOTf (225 μL, 1.96 mmol, 1.1 equiv). Vacuum filtration and subsequent rinsing of the precipitate with Et<sub>2</sub>O (3 × 5 mL) afforded the title compound **7** (526 mg, 1.56 mmol, 86%) as a white powder. **<sup>1</sup>H NMR** (500 MHz, DMSO-*d*<sub>6</sub>): δ/ppm = 1.67 (d, *J* = 6.9 Hz, 3H), 3.17 (s, 9H), 4.87 (q, *J* = 6.9 Hz, 1H), 7.41–7.52 (m, 3H), 7.56–7.62 (m, 2H). **<sup>13</sup>C {<sup>1</sup>H} NMR** (101 MHz, DMSO-*d*<sub>6</sub>): δ/ppm = 15.7, 50.3, 62.4, 82.1, 89.5, 120.3, 120.7 (q, *J* = 322 Hz, CF<sub>3</sub>), 128.7, 129.8, 131.8. **<sup>19</sup>F {<sup>1</sup>H} NMR** (471 MHz, DMSO-*d*<sub>6</sub>): δ/ppm = −77.7 (CF<sub>3</sub>). **IR** (ATR):  $\tilde{\nu}/\text{cm}^{-1}$  = 3041, 2231, 1487, 1250, 1146, 1026, 954, 841, 760, 693. **HRMS** (ESI) calculated for C<sub>13</sub>H<sub>18</sub>N<sup>+</sup> [M–OTf]<sup>+</sup>: 188.1434; found: 188.1432. The spectroscopic data are in accordance with those reported.<sup>[S5]</sup>

**(*S*)-*N,N,N*-Trimethyl-4-phenylbut-3-yn-2-aminium [(*S*)-5]**. Prepared from (*S*)-*N,N*-dimethyl-4-phenylbut-3-yn-2-amine (2.75 g, 15.9 mmol, 1.00 equiv) according to **GP1**, using MeOTf (1.82 mL, 16.1 mmol, 1.01 equiv). Vacuum filtration and subsequent rinsing of the precipitate with Et<sub>2</sub>O (3 × 10 mL) afforded the title compound (*R*)-**7** (1.00 g, 3.08 mmol, 99%) as a white powder. **Optical rotation**: [α] = +20 (c = 1.00, CHCl<sub>3</sub>, >95% ee). This value is consistent with literature ([α] = + 18.6 for 99% ee)<sup>[S5]</sup>. The enantiomeric excess was indicated by a label on the bottle of the corresponding alcohol, prior to dimethylation.

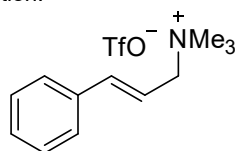**7**

C<sub>13</sub>H<sub>18</sub>F<sub>3</sub>NO<sub>3</sub>S  
M = 325.35 g/mol

**(*E*)-*N,N,N*-Trimethyl-3-phenylprop-2-en-1-aminium trifluoromethanesulfonate (7)**. Prepared from (*E*)-*N,N*-dimethyl-3-phenylprop-2-en-1-amine (500 mg, 3.10 mmol, 1.00 equiv) according to **GP1**, using MeOTf (0.39 mL, 3.4 mmol, 1.1 equiv). Vacuum filtration and subsequent rinsing of the precipitate with Et<sub>2</sub>O (2 × 5 mL) afforded the title compound **7** (1.00 g, 3.08 mmol, 99%) as a white powder. **<sup>1</sup>H NMR** (700 MHz, DMSO-*d*<sub>6</sub>): δ/ppm = 3.07 (s, 9H), 4.10 (d, *J* = 7.5 Hz, 1H), 6.49 (dt, *J* = 15.7 Hz, 7.5 Hz, 1H), 6.88 (d, *J* = 15.7 Hz, 1H), 7.34–7.38 (m, 1H), 7.39–7.43 (m, 2H), 7.57–7.61 (m, 2H). **<sup>13</sup>C {<sup>1</sup>H} NMR** (126 MHz, DMSO-*d*<sub>6</sub>): δ/ppm = 51.9 (t, *J* = 4.0 Hz, [H<sub>3</sub>C]<sub>3</sub>N), 67.0 (t, *J* = 2.7 Hz, H<sub>2</sub>CN), 116.7, 120.7 (q, *J* = 322 Hz, CF<sub>3</sub>), 127.2, 128.7, 128.9, 135.2, 140.9. **<sup>19</sup>F {<sup>1</sup>H} NMR** (659 MHz, DMSO-*d*<sub>6</sub>): δ/ppm = −77.7 (CF<sub>3</sub>). **IR** (ATR):  $\tilde{\nu}/\text{cm}^{-1}$  = 3035, 1652, 1480, 1249, 1150, 1026, 971, 891, 737, 689. **HRMS** (ESI) calculated for C<sub>12</sub>H<sub>18</sub>N<sup>+</sup> [M–OTf]<sup>+</sup>: 176.1434; found: 176.1434. The spectroscopic data are in accordance with those reported.<sup>[S10]</sup>

## 5. Experimental Details of the Nucleophilic Silylation and Characterization Data

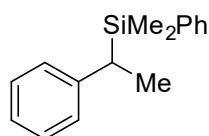**4aa**C<sub>16</sub>H<sub>20</sub>Si

M = 240.42 g/mol

**Dimethyl(phenyl)(1-phenylethyl)silane (4aa).** Prepared from *N,N,N*-trimethyl-1-phenylethan-1-aminium trifluoromethanesulfonate (**1a**, 78 mg, 0.25 mmol, 1.00 equiv) according to **GP2**. The crude material was purified according to **GP3**. Purification by flash column chromatography on silica gel using cyclohexane afforded the title compound **4aa** (51 mg, 0.20 mmol, 81%) as a colorless oil. *R<sub>f</sub>* = 0.55 (cyclohexane). <sup>1</sup>H NMR (500 MHz, CDCl<sub>3</sub>): δ/ppm = 0.19 (s, 3H), 0.24 (s, 3H), 1.33 (d, *J* = 7.5 Hz, 3H), 2.38 (q, *J* = 7.5 Hz, 1H), 6.91–6.98 (m, 2H), 7.05–7.12 (m, 1H), 7.16–7.23 (m, 2H), 7.29–7.41 (m, 5H). <sup>13</sup>C {<sup>1</sup>H} NMR (126 MHz, CDCl<sub>3</sub>): δ/ppm = –5.4, –4.2, 15.2, 29.6, 124.5, 127.4, 127.7, 128.0, 129.1, 134.3, 137.7, 145.3. <sup>29</sup>Si{<sup>1</sup>H} DEPT NMR (99 MHz, CDCl<sub>3</sub>): δ/ppm = –1.05. IR (ATR):  $\tilde{\nu}/\text{cm}^{-1}$  = 3032, 2954, 2869, 1945, 1597, 1248, 1110, 812, 774, 696. HRMS (EI) calculated for C<sub>16</sub>H<sub>20</sub>Si<sup>+</sup> [*M*]<sup>+</sup>: 240.1329; found: 240.1328. The spectroscopic data are in accordance with those reported.<sup>[S11]</sup>

**(S)-Dimethyl(phenyl)(1-phenylethyl)silane [(S)-4aa].** Prepared from (*R*)-*N,N,N*-trimethyl-1-phenylethan-1-aminium trifluoromethanesulfonate [(*R*)-**1a**, 78 mg, 0.25 mmol, 1.00 equiv] according to **GP2**. The crude material was purified according to **GP3**. Purification by flash column chromatography on silica gel using cyclohexane afforded the title compound (*S*)-**4aa** (48 mg, 0.20 mmol, 79%) as a colorless oil. **Optical rotation:** [ $\alpha$ ] = +1.2 (*c* = 1.00, CHCl<sub>3</sub>, >99% ee). The enantiomeric excess of (*S*)-**4aa** was determined at the stage of the alcohol after TAMAO-Oxidation of the corresponding silane. HPLC analysis on a chiral stationary phase (Daicel Chiralcel OJ-H column, column temperature 20 °C, solvent *n*-heptane:isopropanol = 98:2, flow rate 0.8 mL/min,  $\lambda$  = 210 nm): *t<sub>R</sub>* = 24.9 min for (*S*)-**4aa**, *t<sub>R</sub>* = 30.0 min for (*R*)-**4aa**.

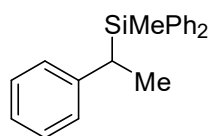**4ab**C<sub>21</sub>H<sub>22</sub>Si

M = 302.49 g/mol

**Methyldiphenyl(1-phenylethyl)silane (4ab).** Prepared from *N,N,N*-trimethyl-1-phenylethan-1-aminium trifluoromethanesulfonate (**1a**, 78 mg, 0.25 mmol, 1.00 equiv) according to **GP2**. The crude material was purified according to **GP3**. Purification by flash column chromatography on silica gel using cyclohexane afforded the title compound **4ab** (30 mg, 0.099 mmol, 40%) as an off-white oil. *R<sub>f</sub>* = 0.37 (cyclohexane). <sup>1</sup>H NMR (500 MHz, CDCl<sub>3</sub>): δ/ppm = 0.45 (s, 3H), 1.42 (d, *J* = 7.5 Hz, 3H), 2.81 (q, *J* = 7.5 Hz, 1H), 6.86–6.93 (m, 2H), 7.04–7.10 (m, 1H), 7.11–7.17 (m, 2H), 7.25–7.31 (m, 2H), 7.32–7.44 (m, 6H), 7.49–7.54 (m, 2H). <sup>13</sup>C {<sup>1</sup>H} NMR (126 MHz, CDCl<sub>3</sub>): δ/ppm = –5.7, 16.1, 28.2, 124.8, 127.7, 127.9 (2C), 128.0, 129.3, 129.4, 135.1, 135.4, 136.1, 144.7. One carbon atom is missing. <sup>29</sup>Si{<sup>1</sup>H} DEPT NMR (99 MHz, CDCl<sub>3</sub>): δ/ppm = –6.25. IR (ATR):  $\tilde{\nu}/\text{cm}^{-1}$  = 3032, 2922, 2868, 1952, 1596, 1425, 1250, 1106, 995, 788, 694. HRMS (APCI) calculated for C<sub>15</sub>H<sub>17</sub>Si<sup>+</sup> [*M*-C<sub>6</sub>H<sub>5</sub>]<sup>+</sup>: 225.1094; found: 225.1106.

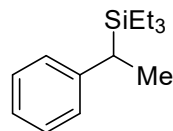**4ac**C<sub>14</sub>H<sub>24</sub>Si

M = 220.43 g/mol

**Triethyl(1-phenylethyl)silane (4ac).** Prepared from *N,N,N*-trimethyl-1-phenylethan-1-aminium trifluoromethanesulfonate (**1a**, 78 mg, 0.25 mmol, 1.00 equiv) according to **GP2**. The crude material was purified according to **GP3**. Purification by flash column chromatography on silica gel using cyclohexane afforded the title compound **4ac** (35 mg, 0.16 mmol, 64%) as a colorless oil. *R<sub>f</sub>* = 0.81 (cyclohexane). <sup>1</sup>H NMR (500 MHz, CDCl<sub>3</sub>): δ/ppm = 0.52 (q, *J* = 8.0 Hz, 6H), 0.89 (t, *J* = 8.0 Hz, 9H), 1.38 (d, *J* = 7.6 Hz, 3H), 2.31 (d, *J* = 7.6 Hz, 1H), 7.04–7.11 (m, 3H), 7.20–7.25 (m, 2H). <sup>13</sup>C {<sup>1</sup>H} NMR (126 MHz, CDCl<sub>3</sub>): δ/ppm = 2.2, 7.6, 15.6, 27.0, 124.3, 127.3, 128.1, 146.5. <sup>29</sup>Si{<sup>1</sup>H} DEPT NMR (99 MHz, CDCl<sub>3</sub>): δ/ppm = 7.46. IR (ATR):  $\tilde{\nu}/\text{cm}^{-1}$  = 2950, 2873, 1598, 1492, 1451, 1237, 1009, 762, 697. HRMS (EI) calculated for C<sub>14</sub>H<sub>24</sub>Si<sup>+</sup> [*M*]<sup>+</sup>: 220.1642; found: 220.1645. The spectroscopic data are in accordance with those reported.<sup>[S12]</sup>



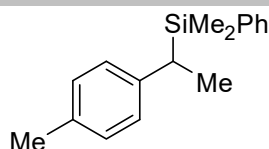**4ba**C<sub>17</sub>H<sub>22</sub>Si

M = 254.45 g/mol

**Dimethyl(phenyl)[1-(p-tolyl)ethyl]silane (4ba).** Prepared from *N,N,N*-trimethyl-1-(p-tolyl)ethan-1-aminium trifluoromethanesulfonate (**1b**, 82 mg, 0.25 mmol, 1.00 equiv) according to **GP2**. The crude material was purified according to **GP3**. Purification by flash column chromatography on silica gel using cyclohexane afforded the title compound **4ba** (50 mg, 0.20 mmol, 79%) as a colorless oil. *R<sub>f</sub>* = 0.60 (cyclohexane). <sup>1</sup>H NMR (500 MHz, CDCl<sub>3</sub>): δ/ppm = 0.20 (s, 3H), 0.24 (s, 3H), 1.32 (d, *J* = 7.6 Hz, 3H), 2.31 (s, 3H), 2.35 (q, *J* = 7.6 Hz, 1H), 6.83–6.88 (m, 2H), 6.99–7.05 (m, 2H), 7.30–7.40 (m, 3H), 7.40–7.44 (m, 2H). <sup>13</sup>C {<sup>1</sup>H} NMR (126 MHz, CDCl<sub>3</sub>): δ/ppm = –5.4, –4.1, 15.4, 21.1, 29.0, 127.3, 127.7, 128.8, 129.1, 133.8, 134.3, 137.9, 142.2. <sup>29</sup>Si{<sup>1</sup>H} DEPT NMR (99 MHz, CDCl<sub>3</sub>): δ/ppm = –1.29. IR (ATR):  $\tilde{\nu}/\text{cm}^{-1}$  = 2953, 2867, 1892, 1509, 1425, 1247, 1111, 1006, 809, 770, 697. HRMS (EI) calculated for C<sub>17</sub>H<sub>22</sub>Si<sup>+</sup> [M]<sup>+</sup>: 254.1485; found: 254.1483.

**(S)-Dimethyl(phenyl)[1-(p-tolyl)ethyl]silane [(S)-4ba].** Prepared from (*S*)-*N,N,N*-trimethyl-1-(p-tolyl)ethan-1-aminium trifluoromethanesulfonate [(*R*)-**1b**, 82 mg, 0.25 mmol, 1.00 equiv] according to **GP2**. The crude material was purified according to **GP3**. Purification by flash column chromatography on silica gel using cyclohexane afforded the title compound **4ba** (49 mg, 0.19 mmol, 77%) as a colorless oil. **Optical rotation:** [α] = +2.5 (*c* = 0.10, CHCl<sub>3</sub>, 98% ee). The enantiomeric excess of (*S*)-**4ba** was determined at the stage of the alcohol after TAMAO-Oxidation of the corresponding silane. HPLC analysis on a chiral stationary phase (Daicel Chiralcel OJ-H column, column temperature 20 °C, solvent *n*-heptane:isopropanol = 98:2, flow rate 0.8 mL/min, λ = 210 nm): *t<sub>R</sub>* = 24.3 min for (*R*)-**4ba**, *t<sub>R</sub>* = 28.8 min for (*S*)-**4ba**.

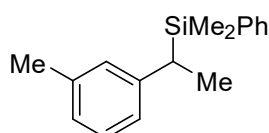**4ca**C<sub>17</sub>H<sub>22</sub>Si

M = 254.45 g/mol

**Dimethyl(phenyl)[1-(m-tolyl)ethyl]silane (4ca).** Prepared from *N,N,N*-trimethyl-1-(m-tolyl)ethan-1-aminium trifluoromethanesulfonate (**1c**, 82 mg, 0.25 mmol, 1.00 equiv) according to **GP2**. The crude material was purified according to **GP3**. Purification by flash column chromatography on silica gel using cyclohexane afforded the title compound **4ca** (48 mg, 0.19 mmol, 75%) as a colorless oil. *R<sub>f</sub>* = 0.60 (cyclohexane). <sup>1</sup>H NMR (500 MHz, CDCl<sub>3</sub>): δ/ppm = 0.19 (s, 3H), 0.24 (s, 3H), 1.31 (d, *J* = 7.5 Hz, 3H), 2.26 (s, 3H), 2.35 (q, *J* = 7.5 Hz, 1H), 6.72 (s, 1H), 6.74–6.77 (m, 1H), 6.88–6.92 (m, 1H), 7.06–7.11 (m, 1H), 7.29–7.41 (m, 5H). <sup>13</sup>C {<sup>1</sup>H} NMR (126 MHz, CDCl<sub>3</sub>): δ/ppm = –5.4, –4.2, 15.2, 21.6, 29.5, 124.5, 125.3, 127.6, 127.9, 128.4, 129.1, 134.3, 137.4, 137.8, 145.2. <sup>29</sup>Si{<sup>1</sup>H} DEPT NMR (99 MHz, CDCl<sub>3</sub>): δ/ppm = –1.18. IR (ATR):  $\tilde{\nu}/\text{cm}^{-1}$  = 3019, 2953, 2867, 1602, 1426, 1247, 1111, 811, 769, 697. HRMS (EI) calculated for C<sub>17</sub>H<sub>22</sub>Si<sup>+</sup> [M]<sup>+</sup>: 254.1485; found: 254.1485.

**(S)-Dimethyl(phenyl)[1-(m-tolyl)ethyl]silane [(S)-4ca].** Prepared from (*R*)-*N,N,N*-trimethyl-1-(m-tolyl)ethan-1-aminium trifluoromethanesulfonate [(*R*)-**1c**, 82 mg, 0.25 mmol, 1.00 equiv] according to **GP2**. The crude material was purified according to **GP3**. Purification by flash column chromatography on silica gel using cyclohexane afforded the title compound (*S*)-**4ca** (48 mg, 0.19 mmol, 76%) as a colorless oil. **Optical rotation:** [α] = +2.7 (*c* = 0.10, CHCl<sub>3</sub>, 98% ee). The enantiomeric excess of (*S*)-**4ca** was determined at the stage of the alcohol after TAMAO-Oxidation of the corresponding silane. HPLC analysis on a chiral stationary phase (Daicel Chiralcel OJ-H column, column temperature 20 °C, solvent *n*-heptane:isopropanol = 98:2, flow rate 0.8 mL/min, λ = 210 nm): *t<sub>R</sub>* = 20.5 min for (*R*)-**4ca**, *t<sub>R</sub>* = 22.7 min for (*S*)-**4ca**.

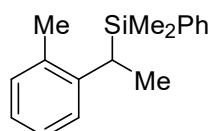**4da**C<sub>17</sub>H<sub>22</sub>Si

M = 254.45 g/mol

**Dimethyl(phenyl)[1-(o-tolyl)ethyl]silane (4da).** Prepared from *N,N,N*-trimethyl-1-(o-tolyl)ethan-1-aminium trifluoromethanesulfonate (**1d**, 82 mg, 0.25 mmol, 1.00 equiv) according to **GP2**. The crude material was purified according to **GP3**. Purification by flash column chromatography on silica gel using cyclohexane afforded the title compound **4da** (25 mg, 0.098 mmol, 39%) as an off-white oil. *R<sub>f</sub>* = 0.60

## SUPPORTING INFORMATION

(cyclohexane).  $^1\text{H NMR}$  (500 MHz,  $\text{CDCl}_3$ ):  $\delta/\text{ppm}$  = 0.18 (s, 3H), 0.30 (s, 3H), 1.33 (d,  $J$  = 7.5 Hz, 3H), 2.09 (s, 3H), 2.60 (q,  $J$  = 7.5 Hz, 1H), 6.95–7.02 (m, 2H), 7.04–7.08 (m, 1H), 7.09–7.14 (m, 1H), 7.28–7.33 (m, 2H), 7.34–7.39 (m, 3H).  $^{13}\text{C}\{^1\text{H}\}$  NMR (126 MHz,  $\text{CDCl}_3$ ):  $\delta/\text{ppm}$  = –5.3, –4.1, 16.0, 20.4, 24.1, 124.3, 125.9, 126.5, 127.7, 129.1, 130.1, 134.2, 135.0, 138.1, 144.0.  $^{29}\text{Si}\{^1\text{H}\}$  DEPT NMR (99 MHz,  $\text{CDCl}_3$ ):  $\delta/\text{ppm}$  = –0.96. IR (ATR):  $\tilde{\nu}/\text{cm}^{-1}$  = 3065, 2954, 2868, 1733, 1600, 1457, 1248, 1109, 1034, 808, 697. HRMS (ESI) calculated for  $\text{C}_{17}\text{H}_{22}\text{Si}^+ [\text{M}-\text{C}_6\text{H}_5]^+$ : 177.1094; found: 177.1090.

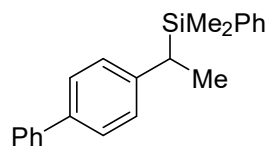**4ea** $\text{C}_{22}\text{H}_{24}\text{Si}$ 

M = 316.52 g/mol

**{1-[(1,1'-biphenyl)-4-yl]ethyl}dimethyl(phenyl)silane (4ea)**. Prepared from 1-[(1,1'-biphenyl)-4-yl]-*N,N,N*-trimethylethan-1-aminium trifluoromethanesulfonate (**1e**, 97 mg, 0.25 mmol, 1.00 equiv) according to **GP2**. The crude material was purified according to **GP3**. Purification by flash column chromatography on silica gel using cyclohexane afforded the title compound **4ea** (36 mg, 0.11 mmol, 46%) as an off-white solid.  $R_f$  = 0.20 (cyclohexane). **M.P.** 48–50 °C (cyclohexane).  $^1\text{H NMR}$  (500 MHz,  $\text{CDCl}_3$ ):  $\delta/\text{ppm}$  = 0.24 (s, 3H), 0.28 (s, 3H), 1.37 (d,  $J$  = 7.6 Hz, 3H), 2.44 (q,  $J$  = 7.6 Hz, 1H), 6.98–7.05 (m, 2H), 7.28–7.48 (m, 10H), 7.57–7.63 (m, 2H).  $^{13}\text{C}\{^1\text{H}\}$  NMR (126 MHz,  $\text{CDCl}_3$ ):  $\delta/\text{ppm}$  = –5.3, –4.2, 15.2, 29.4, 126.7, 126.9, 127.0, 127.7, 127.8, 128.8, 129.2, 134.3, 137.4, 137.6, 141.3, 144.6.  $^{29}\text{Si}\{^1\text{H}\}$  DEPT NMR (99 MHz,  $\text{CDCl}_3$ ):  $\delta/\text{ppm}$  = –1.02. IR (ATR):  $\tilde{\nu}/\text{cm}^{-1}$  = 3020, 2951, 1484, 1425, 1245, 1110, 1006, 811, 760, 689. HRMS (APCI) calculated for  $\text{C}_{16}\text{H}_{19}\text{Si}^+ [\text{M}-\text{C}_6\text{H}_5]^+$ : 239.1251; found: 239.1250.

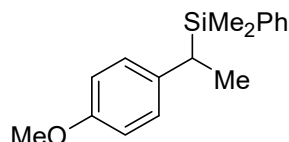**4fa** $\text{C}_{17}\text{H}_{22}\text{OSi}$ 

M = 270.45 g/mol

**[1-(4-Methoxyphenyl)ethyl]dimethyl(phenyl)silane (4fa)**. Prepared from 1-(4-methoxyphenyl)-*N,N,N*-trimethylethan-1-aminium trifluoromethanesulfonate (**1f**, 86 mg, 0.25 mmol, 1.00 equiv) according to **GP2**. Purification by flash column chromatography on silica gel using *tert*-butyl methyl ether in cyclohexane (0%→2%) afforded the title compound **4fa** (52 mg, 0.19 mmol, 77%) as a colorless oil.  $R_f$  = 0.45 (*tert*-butyl methyl ether:cyclohexane = 1:49).  $^1\text{H NMR}$  (500 MHz,  $\text{CDCl}_3$ ):  $\delta/\text{ppm}$  = 0.19 (s, 3H), 0.23 (s, 3H), 1.30 (d,  $J$  = 7.6 Hz, 3H), 2.31 (q,  $J$  = 7.6 Hz, 1H), 3.78 (s, 3H), 6.73–6.78 (m, 2H), 6.83–6.88 (m, 2H), 7.30–7.41 (m, 5H).  $^{13}\text{C}\{^1\text{H}\}$  NMR (126 MHz,  $\text{CDCl}_3$ ):  $\delta/\text{ppm}$  = –5.4, –4.2, 15.5, 28.4, 55.4, 113.5, 127.7, 128.2, 129.1, 134.3, 137.3, 137.9, 156.9.  $^{29}\text{Si}\{^1\text{H}\}$  DEPT NMR (99 MHz,  $\text{CDCl}_3$ ):  $\delta/\text{ppm}$  = –1.31. IR (ATR):  $\tilde{\nu}/\text{cm}^{-1}$  = 2952, 1727, 1608, 1506, 1458, 1242, 1111, 1037, 807, 733. HRMS (EI) calculated for  $\text{C}_{17}\text{H}_{22}\text{OSi}^+ [\text{M}]^+$ : 270.1434; found: 270.1428.

**(*R*)-[1-(4-Methoxyphenyl)ethyl]dimethyl(phenyl)silane [(*R*)-4fa]**. Prepared from (*S*)-1-(4-methoxyphenyl)-*N,N,N*-trimethylethan-1-aminium trifluoromethanesulfonate [(*S*)-**1f**, 86 mg, 0.25 mmol, 1.00 equiv] according to **GP2**. Purification by flash column chromatography on silica gel using *tert*-butyl methyl ether in cyclohexane (0%→2%) afforded the title compound **4fa** (50 mg, 0.19 mmol, 75%) as a colorless oil. **Optical rotation**:  $[\alpha]_D^{20}$  = +11.2 ( $c$  = 0.5,  $\text{CHCl}_3$ , 97% ee). The enantiomeric excess of (*R*)-**4fa** was determined at the stage of the alcohol after TAMAO-Oxidation of the corresponding silane. HPLC analysis on a chiral stationary phase (Daicel Chiralcel OJ-H column, column temperature 20 °C, solvent *n*-heptane:isopropanol = 95:5, flow rate 0.8 mL/min,  $\lambda$  = 210 nm):  $t_R$  = 22.4 min for (*S*)-**4fa**,  $t_R$  = 24.1 min for (*R*)-**4fa**.

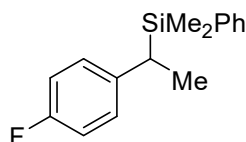**4ga** $\text{C}_{16}\text{H}_{19}\text{FSi}$ 

M = 258.41 g/mol

**[1-(4-fluorophenyl)ethyl]dimethyl(phenyl)silane (4ga)**. Prepared from 1-(4-fluorophenyl)-*N,N,N*-trimethylethan-1-aminium trifluoromethanesulfonate (**1g**, 83 mg, 0.25 mmol, 1.00 equiv) according to **GP2**. The crude material was purified according to **GP3**. Purification by flash column chromatography on silica gel using cyclohexane afforded the title compound **4ga** (48 mg, 0.19 mmol, 74%) as a colorless oil.  $R_f$  = 0.43 (cyclohexane).  $^1\text{H NMR}$  (500 MHz,  $\text{CDCl}_3$ ):  $\delta/\text{ppm}$  = 0.20 (s, 3H), 0.24 (s, 3H), 1.31 (d,  $J$  = 7.6 Hz, 3H), 2.35 (q,  $J$  = 7.6 Hz, 1H), 6.82–6.91 (m, 4H), 7.29–7.39 (m, 5H).  $^{13}\text{C}\{^1\text{H}\}$  NMR (126 MHz,  $\text{CDCl}_3$ ):  $\delta/\text{ppm}$  = –5.3, –4.5, 15.4, 28.9, 114.7 (d,  $J$  = 20.8 Hz), 127.7, 128.4

## SUPPORTING INFORMATION

(d,  $J = 7.6$  Hz), 129.2, 134.3, 137.3, 140.9, 160.5 (d,  $J = 241$  Hz).  $^{29}\text{Si}\{^1\text{H}\}$  DEPT NMR (99 MHz,  $\text{CDCl}_3$ ):  $\delta/\text{ppm} = -1.07$ . IR (ATR):  $\tilde{\nu}/\text{cm}^{-1} = 3067, 2955, 2869, 1878, 1599, 1503, 1426, 1315, 1220, 1110, 1009, 809, 771, 697$ . HRMS (EI) calculated for  $\text{C}_{16}\text{H}_{19}\text{FSi}^+$   $[\text{M}]^+$ : 258.1235; found: 258.1230.

**(S)-[1-(4-fluorophenyl)ethyl]dimethyl(phenyl)silane [(S)-4ga]**. Prepared from 1-(4-fluorophenyl)-*N,N,N*-trimethylethan-1-aminium trifluoromethanesulfonate [(*R*)-1g, 83 mg, 0.25 mmol, 1.00 equiv] according to GP2. The crude material was purified according to GP3. Purification by flash column chromatography on silica gel using cyclohexane afforded the title compound (S)-4ga (46 mg, 0.18 mmol, 71%) as a colorless oil. **Optical rotation**:  $[\alpha] = -20.9$  ( $c = 1.0$ ,  $\text{CHCl}_3$ , 98% ee). The enantiomeric excess of (S)-4ga was determined at the stage of the alcohol after TAMAO-Oxidation of the corresponding silane. HPLC analysis on a chiral stationary phase (Daicel Chiralcel OJ-H column, column temperature 20 °C, solvent *n*-heptane:isopropanol = 98:2, flow rate 0.8 mL/min,  $\lambda = 210$  nm):  $t_{\text{R}} = 25.9$  min for (S)-4ga,  $t_{\text{R}} = 27.8$  min for (R)-4ga.

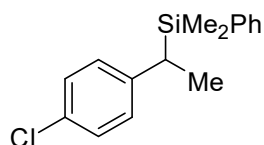**4ha**

$\text{C}_{16}\text{H}_{19}\text{ClSi}$   
M = 274.86 g/mol

**[1-(4-Chlorophenyl)ethyl]dimethyl(phenyl)silane (4ha)**. Prepared from 1-(4-chlorophenyl)-*N,N,N*-trimethylethan-1-aminium trifluoromethanesulfonate (1h, 87 mg, 0.25 mmol, 1.00 equiv) according to GP2. The crude material was purified according to GP3. Purification by flash column chromatography on silica gel using cyclohexane afforded the title compound 4ha (43 mg, 0.16 mmol, 62%) as a colorless oil.  $R_{\text{f}} = 0.47$  (cyclohexane).  $^1\text{H}$  NMR (500 MHz,  $\text{CDCl}_3$ ):  $\delta/\text{ppm} = 0.20$  (s, 3H), 0.24 (s, 3H), 1.31 (d,  $J = 7.6$  Hz, 3H), 2.35 (q,  $J = 7.6$  Hz, 1H), 6.80–6.87 (m, 2H), 7.12–7.18 (m, 2H), 7.29–7.40 (m, 5H).  $^{13}\text{C}$   $\{^1\text{H}\}$  NMR (126 MHz,  $\text{CDCl}_3$ ):  $\delta/\text{ppm} = -5.3, -4.5, 15.1, 29.2, 127.8, 128.1, 128.6, 129.3, 130.1, 134.3, 137.1, 143.9$ .  $^{29}\text{Si}\{^1\text{H}\}$  DEPT NMR (99 MHz,  $\text{CDCl}_3$ ):  $\delta/\text{ppm} = -0.99$ . IR (ATR):  $\tilde{\nu}/\text{cm}^{-1} = 3067, 2954, 2869, 1889, 1487, 1248, 1111, 1009, 830, 770, 698$ . HRMS (APCI) calculated for  $\text{C}_{16}\text{H}_{18}\text{FSi}^+$   $[\text{M}-\text{H}]^+$ : 273.0861; found: 273.0859.

**(R)-[1-(4-Chlorophenyl)ethyl]dimethyl(phenyl)silane [(R)-4ha]**. Prepared from (S)-1-(4-chlorophenyl)-*N,N,N*-trimethylethan-1-aminium trifluoromethanesulfonate [(S)-1h, 87 mg, 0.25 mmol, 1.00 equiv] according to GP2. The crude material was purified according to GP3. Purification by flash column chromatography on silica gel using cyclohexane afforded the title compound (R)-4ha (44 mg, 0.16 mmol, 64%) as a colorless oil. **Optical rotation**:  $[\alpha] = +18.5$  ( $c = 1.0$ ,  $\text{CHCl}_3$ , 98% ee). The enantiomeric excess of (R)-4ha was determined at the stage of the alcohol after TAMAO-Oxidation of the corresponding silane. HPLC analysis on a chiral stationary phase (Daicel Chiralcel OJ-H column, column temperature 20 °C, solvent *n*-heptane:isopropanol = 98:2, flow rate 0.8 mL/min,  $\lambda = 210$  nm):  $t_{\text{R}} = 24.8$  min for (S)-4ha,  $t_{\text{R}} = 27.8$  min for (R)-4ha.

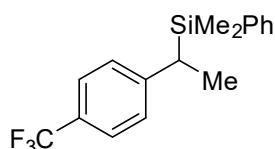**4ia**

$\text{C}_{17}\text{H}_{19}\text{F}_3\text{Si}$   
M = 308.42 g/mol

**Dimethyl(phenyl){1-[4-(trifluoromethyl)phenyl]ethyl}silane (4ia)**. Prepared from 1-[4-(trifluoromethyl)phenyl]-*N,N,N*-trimethylethan-1-aminium trifluoromethanesulfonate (1i, 87 mg, 0.25 mmol, 1.00 equiv) according to GP2. The crude material was purified according to GP3. Purification by flash column chromatography on silica gel using cyclohexane afforded the title compound 4ia (50 mg, 0.16 mmol, 65%) as an off-white oil.  $R_{\text{f}} = 0.63$  (cyclohexane).  $^1\text{H}$  NMR (400 MHz,  $\text{CDCl}_3$ ):  $\delta/\text{ppm} = 0.21$  (s, 3H), 0.25 (s, 3H), 1.35 (d,  $J = 7.5$  Hz, 3H), 2.45 (q,  $J = 7.5$  Hz, 1H), 6.97–7.02 (m, 2H), 7.29–7.40 (m, 5H), 7.40–7.45 (m, 2H).  $^{13}\text{C}$   $\{^1\text{H}\}$  NMR (101 MHz,  $\text{CDCl}_3$ ):  $\delta/\text{ppm} = -5.4, -4.5, 15.0, 30.1, 124.6$  (q,  $J = 272$  Hz,  $\text{CF}_3$ ), 124.9 (q,  $J = 3.8$  Hz), 127.5, 127.8, 129.4, 134.2, 134.3, 136.8, 149.8.  $^{29}\text{Si}\{^1\text{H}\}$  DEPT NMR (99 MHz,  $\text{CDCl}_3$ ):  $\delta/\text{ppm} = -1.26$ . IR (ATR):  $\tilde{\nu}/\text{cm}^{-1} = 2956, 1614, 1426, 1322, 1251, 1112, 1067, 829, 791, 731, 697$ . HRMS (APCI) calculated for  $\text{C}_{17}\text{H}_{20}\text{F}_3\text{Si}^+$   $[\text{M}+\text{H}]^+$ : 308.1208; found: 308.1214.

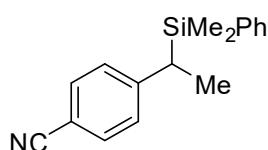**4ia**

$\text{C}_{17}\text{H}_{19}\text{NSi}$   
M = 265.43 g/mol

## SUPPORTING INFORMATION

**4-{1-[Dimethyl(phenyl)silyl]ethyl}benzonitrile (4ja).** Prepared from 1-(4-cyanophenyl)-*N,N,N*-trimethylethan-1-aminium trifluoromethanesulfonate (**1j**, 85 mg, 0.25 mmol, 1.00 equiv) according to **GP2**. Purification by flash column chromatography on silica gel using CH<sub>2</sub>Cl<sub>2</sub> in cyclohexane (0% →10%) afforded the title compound **4ja** (33 mg, 0.12 mmol, 50%) as an off-white solid. *R<sub>f</sub>* = 0.08 (CH<sub>2</sub>Cl<sub>2</sub>:Cyclohexane = 1:19). **M.P.** 46–48 °C. **<sup>1</sup>H NMR** (500 MHz, CDCl<sub>3</sub>): δ/ppm = 0.22 (s, 3H), 0.26 (s, 3H), 1.35 (d, *J* = 7.4 Hz, 3H), 2.46 (q, *J* = 7.4 Hz, 1H), 6.94–6.98 (m, 2H), 7.29–7.41 (m, 5H), 7.43–7.47 (m, 2H). **<sup>13</sup>C {<sup>1</sup>H} NMR** (126 MHz, CDCl<sub>3</sub>): δ/ppm = –5.2, –4.8, 14.7, 31.0, 108.1, 119.6, 127.9 (2C), 129.6, 131.8, 134.2, 136.3, 151.7. **<sup>29</sup>Si{<sup>1</sup>H} DEPT NMR** (99 MHz, CDCl<sub>3</sub>): δ/ppm = –0.29. **IR** (ATR):  $\tilde{\nu}/\text{cm}^{-1}$  = 3067, 2956, 2875, 2220, 1600, 1412, 1248, 1109, 1009, 804, 772, 698. **HRMS** (APCI) calculated for C<sub>17</sub>H<sub>19</sub>NSi<sup>+</sup> [M]<sup>+</sup>: 265.1281; found: 265.1277.

**(S)-4-{1-[Dimethyl(phenyl)silyl]ethyl}benzonitrile [(S)-4ja].** Prepared from (*R*)-1-(4-cyanophenyl)-*N,N,N*-trimethylethan-1-aminium trifluoromethanesulfonate [(*R*)-**1j**, 85 mg, 0.25 mmol, 1.00 equiv] according to **GP2**. Purification by flash column chromatography on silica gel using CH<sub>2</sub>Cl<sub>2</sub> in cyclohexane (0% →10%) afforded the title compound (*S*)-**4ja** (32 mg, 0.12 mmol, 48%) as an off-white solid. **Optical rotation:** [α] = +7.1 (*c* = 0.5, CHCl<sub>3</sub>, 99% ee). The enantiomeric excess of (*S*)-**4ja** was determined by HPLC analysis on a chiral stationary phase (Daicel Chiralcel OD-H column, column temperature 20 °C, solvent *n*-heptane:isopropanol = 99.5:0.5, flow rate 0.8 mL/min, λ = 210 nm): *t<sub>R</sub>* = 9.8 min for (*S*)-**4ja**, *t<sub>R</sub>* = 10.9 min for (*R*)-**4ja**.

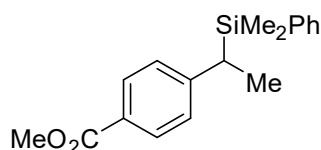**4ka**

C<sub>18</sub>H<sub>22</sub>O<sub>2</sub>Si  
M = 298.46 g/mol

**Methyl 4-{1-[dimethyl(phenyl)silyl]ethyl}benzoate (4ka).** Prepared from 1-[4-(methoxycarbonyl)phenyl]-*N,N,N*-trimethylethan-1-aminium trifluoromethanesulfonate (**1k**, 93 mg, 0.25 mmol, 1.00 equiv) according to **GP2**. Purification by flash column chromatography on silica gel using *tert*-butyl methyl ether in cyclohexane (0%→2%) afforded the title compound **4ka** (56 mg, 0.19 mmol, 75%) as an off-white oil. *R<sub>f</sub>* = 0.25 (*tert*-butyl methyl ether:cyclohexane = 1:39). **<sup>1</sup>H NMR** (500 MHz, CDCl<sub>3</sub>): δ/ppm = 0.20 (s, 3H), 0.24 (s, 3H), 1.35 (d, *J* = 7.4 Hz, 3H), 2.47 (q, *J* = 7.4 Hz, 1H), 3.89 (s, 3H), 6.94–7.00 (m, 2H), 7.28–7.40 (m, 5H), 7.83–7.89 (m, 2H). **<sup>13</sup>C {<sup>1</sup>H} NMR** (126 MHz, CDCl<sub>3</sub>): δ/ppm = –5.3, –4.5, 14.9, 30.5, 52.0, 126.7, 127.3, 127.8, 129.4 (2C), 134.3, 136.9, 151.5, 167.5. **<sup>29</sup>Si{<sup>1</sup>H} DEPT NMR** (99 MHz, CDCl<sub>3</sub>): δ/ppm = –0.62. **IR** (ATR):  $\tilde{\nu}/\text{cm}^{-1}$  = 2952, 2870, 1716, 1604, 1431, 1273, 1178, 1106, 812, 699. **HRMS** (APCI) calculated for C<sub>18</sub>H<sub>23</sub>O<sub>2</sub>Si<sup>+</sup> [M]<sup>+</sup>: 299.1462; found: 299.1459.

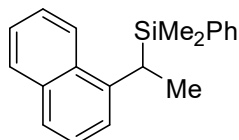**4la**

C<sub>20</sub>H<sub>22</sub>Si  
M = 290.48 g/mol

**Dimethyl[1-(naphthalen-1-yl)ethyl](phenyl)silane (4la).** Prepared from *N,N,N*-trimethyl-1-(naphthalen-1-yl)ethan-1-aminium trifluoromethanesulfonate (**1l**, 87 mg, 0.25 mmol, 1.00 equiv) according to **GP2**. The crude material was purified according to **GP3**. Purification by flash column chromatography on silica gel using cyclohexane afforded the title compound **4la** (59 mg, 0.20 mmol, 81%) as an off-white oil. *R<sub>f</sub>* = 0.35 (cyclohexane). **<sup>1</sup>H NMR** (500 MHz, CDCl<sub>3</sub>): δ/ppm = 0.12 (s, 3H), 0.22 (s, 3H), 1.47 (d, *J* = 7.0 Hz, 3H), 3.31 (q, *J* = 7.0 Hz, 1H), 7.09–7.14 (m, 1H), 7.28–7.46 (m, 8H), 7.59–7.64 (m, 1H), 7.80–7.84 (m, 1H), 7.96–8.02 (m, 1H). **<sup>13</sup>C {<sup>1</sup>H} NMR** (126 MHz, CDCl<sub>3</sub>): δ/ppm = –5.3, –3.5, 16.3, 23.1, 123.5, 124.0, 125.0, 125.1, 125.2, 125.6, 127.7, 128.9, 129.2, 131.8, 134.0, 134.3, 137.8, 142.2. **<sup>29</sup>Si{<sup>1</sup>H} DEPT NMR** (99 MHz, CDCl<sub>3</sub>): δ/ppm = –0.11. **IR** (ATR):  $\tilde{\nu}/\text{cm}^{-1}$  = 3045, 2953, 2923, 2869, 1591, 1459, 1392, 1248, 1110, 811, 771, 697. **HRMS** (APCI) calculated for C<sub>20</sub>H<sub>23</sub>Si<sup>+</sup> [M+H]<sup>+</sup>: 291.1564; found: 291.1575.

**(S)-Dimethyl[1-(naphthalen-1-yl)ethyl](phenyl)silane [(S)-4la].** Prepared from (*R*)-*N,N,N*-trimethyl-1-(naphthalen-1-yl)ethan-1-aminium trifluoromethanesulfonate [(*R*)-**1l**, 87 mg, 0.25 mmol, 1.00 equiv] according to **GP2**. The crude material was purified according to **GP3**. Purification by flash column chromatography on silica gel using cyclohexane afforded the title compound (*S*)-**4la** (60 mg, 0.21 mmol, 81%) as an off-white oil. **Optical rotation:** [α] = +69.8 (*c* = 1.0, CHCl<sub>3</sub>, 99% ee). The enantiomeric excess of (*S*)-**4la** was determined at the stage of the alcohol after TAMAO-Oxidation of the corresponding silane. HPLC analysis on a chiral stationary phase (Daicel Chiralcel OJ-H column, column temperature 20 °C, solvent *n*-heptane:isopropanol = 95:5, flow rate 0.8 mL/min, λ = 210 nm): *t<sub>R</sub>* = 31.1 min for (*S*)-**4la**, *t<sub>R</sub>* = 42.0 min for (*R*)-**4la**.

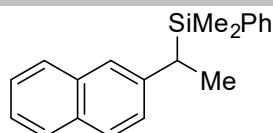**4ma**C<sub>20</sub>H<sub>22</sub>Si

M = 290.48 g/mol

**Dimethyl[1-(naphthalen-2-yl)ethyl](phenyl)silane (4ma).** Prepared from *N,N,N*-trimethyl-1-(naphthalen-2-yl)ethan-1-aminium trifluoromethanesulfonate (**1m**, 91 mg, 0.25 mmol, 1.00 equiv) according to **GP2**. The crude material was purified according to **GP3**. Purification by flash column chromatography on silica gel using cyclohexane afforded the title compound **4ma** (54 mg, 0.19 mmol, 75%) as a colorless oil. *R<sub>f</sub>* = 0.40 (cyclohexane). **<sup>1</sup>H NMR** (500 MHz, CDCl<sub>3</sub>): δ/ppm = 0.22 (s, 3H), 0.27 (s, 3H), 1.43 (d, *J* = 7.5 Hz, 3H), 2.55 (q, *J* = 7.5 Hz, 1H), 7.06–7.12 (m, 1H), 7.29–7.45 (m, 8H), 7.64–7.72 (m, 2H), 7.75–7.80 (m, 1H). **<sup>13</sup>C {<sup>1</sup>H} NMR** (126 MHz, CDCl<sub>3</sub>): δ/ppm = –5.3, –4.2, 15.3, 29.9, 124.7 (2C), 125.8, 127.3, 127.4 (2C), 127.7 (2C), 129.2, 131.5, 133.8, 134.3, 137.6, 143.1. **<sup>29</sup>Si{<sup>1</sup>H} DEPT NMR** (99 MHz, CDCl<sub>3</sub>): δ/ppm = –0.82. **IR** (ATR):  $\tilde{\nu}/\text{cm}^{-1}$  = 3048, 2953, 2867, 1628, 1596, 1425, 1247, 1111, 810, 733, 698. **HRMS** (APCI) calculated for C<sub>20</sub>H<sub>23</sub>Si<sup>+</sup> [M+H]<sup>+</sup>: 291.1564; found: 291.1575.

**(S)-Dimethyl[1-(naphthalen-2-yl)ethyl](phenyl)silane [(S)-4ma].** Prepared from (*R*)-*N,N,N*-trimethyl-1-(naphthalen-2-yl)ethan-1-aminium trifluoromethanesulfonate [(*R*)-**1m**, 91 mg, 0.25 mmol, 1.00 equiv] according to **GP2**. The crude material was purified according to **GP3**. Purification by flash column chromatography on silica gel using cyclohexane afforded the title compound (*S*)-**4ma** (56 mg, 0.19 mmol, 77%) as a colorless oil. **Optical rotation:** [α] = –46.1 (*c* = 1.0, CHCl<sub>3</sub>, 97% ee). The enantiomeric excess of (*S*)-**4ma** was determined at the stage of the alcohol after TAMAO-Oxidation of the corresponding silane. HPLC analysis on a chiral stationary phase (Daicel Chiralcel OJ-H column, column temperature 20 °C, solvent *n*-heptane:isopropanol = 95:5, flow rate 0.8 mL/min, λ = 210 nm): *t<sub>R</sub>* = 30.9 min for (*S*)-**4ma**, *t<sub>R</sub>* = 42.0 min for (*R*)-**4ma**.

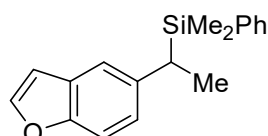**4na**C<sub>18</sub>H<sub>20</sub>OSi

M = 280.44 g/mol

**[1-(Benzofuran-5-yl)ethyl]dimethyl(phenyl)silane (4na).** Prepared from 1-(Benzofuran-5-yl)-*N,N,N*-trimethylethan-1-aminium trifluoromethanesulfonate (**1n**, 93 mg, 0.25 mmol, 1.00 equiv) according to **GP2**. Purification by flash column chromatography on silica gel using *tert*-butyl methyl ether in cyclohexane (0%→1%) afforded the title compound **4na** (51 mg, 0.18 mmol, 73%) as a yellow oil. *R<sub>f</sub>* = 0.25 (cyclohexane). **<sup>1</sup>H NMR** (500 MHz, CDCl<sub>3</sub>): δ/ppm = 0.20 (s, 3H), 0.25 (s, 3H), 1.38 (d, *J* = 7.5 Hz, 3H), 2.47 (q, *J* = 7.5 Hz, 1H), 6.66 (dd, *J* = 2.2 Hz, 0.95 Hz, 1H), 6.87 (dd, *J* = 8.5 Hz, 1.9 Hz, 1H), 7.14 (d, *J* = 1.9 Hz, 1H), 7.29–7.34 (m, 3H), 7.34–7.37 (m, 1H), 7.37–7.41 (m, 2H), 7.56 (d, *J* = 2.2 Hz, 1H). **<sup>13</sup>C {<sup>1</sup>H} NMR** (126 MHz, CDCl<sub>3</sub>): δ/ppm = –5.4, –4.2, 15.9, 29.3, 106.5, 110.6, 119.0, 124.4, 127.4, 127.7, 129.1, 134.3, 137.8, 139.8, 144.9, 153.9. **<sup>29</sup>Si{<sup>1</sup>H} DEPT NMR** (99 MHz, CDCl<sub>3</sub>): δ/ppm = –1.15. **IR** (ATR):  $\tilde{\nu}/\text{cm}^{-1}$  = 3066, 2953, 2867, 1462, 1248, 1109, 1030, 810, 731, 698. **HRMS** (APCI) calculated for C<sub>18</sub>H<sub>21</sub>OSi<sup>+</sup> [M+H]<sup>+</sup>: 281.1356; found: 281.1355.

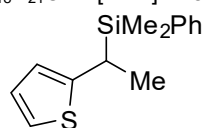**4oa**C<sub>14</sub>H<sub>18</sub>SSi

M = 246.44 g/mol

**Dimethyl(phenyl)(1-(thiophen-2-yl)ethyl)silane (4oa).** Prepared from *N,N,N*-trimethyl-1-(thiophen-2-yl)ethan-1-aminium trifluoromethanesulfonate (**1o**, 80 mg, 0.25 mmol, 1.00 equiv) according to **GP2**. The crude material was purified according to **GP3**. Purification by flash column chromatography on silica gel using cyclohexane afforded the title compound **4oa** (39 mg, 0.16 mmol, 63%) as a colorless oil. *R<sub>f</sub>* = 0.54 (cyclohexane). **<sup>1</sup>H NMR** (500 MHz, CDCl<sub>3</sub>): δ/ppm = 0.26 (s, 3H), 0.31 (s, 3H), 1.37 (d, *J* = 7.5 Hz, 3H), 2.69 (q, *J* = 7.5 Hz, 1H), 6.53 (dt, *J* = 3.5 Hz, 0.95 Hz, 1H), 6.88 (dd, *J* = 5.1 Hz, 3.5 Hz, 1H), 6.99 (dd, *J* = 5.1 Hz, 1.0 Hz, 1H), 7.29–7.47 (m, 2H). **<sup>13</sup>C {<sup>1</sup>H} NMR** (126 MHz, CDCl<sub>3</sub>): δ/ppm = –5.3, –4.3, 17.1, 25.2, 121.1, 122.1, 126.7, 127.8, 129.3, 134.2, 137.4, 149.3. **<sup>29</sup>Si{<sup>1</sup>H} DEPT NMR** (99 MHz, CDCl<sub>3</sub>): δ/ppm = –1.05. **IR** (ATR):  $\tilde{\nu}/\text{cm}^{-1}$  = 3067, 2953, 2867, 1454, 1426, 1248, 1110, 991, 810, 772, 731. **HRMS** (APCI) calculated for C<sub>20</sub>H<sub>23</sub>Si<sup>+</sup> [M+H]<sup>+</sup>: 247.0971; found: 247.0969.

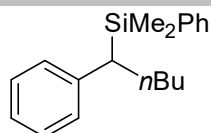**4pa**C<sub>19</sub>H<sub>26</sub>Si

M = 282.50 g/mol

**Dimethyl(phenyl)(1-phenylpentyl)silane (4pa).** Prepared from *N,N,N*-trimethyl-1-phenylpentan-1-aminium trifluoromethanesulfonate (**1p**, 89 mg, 0.25 mmol, 1.00 equiv) according to **GP2**. The crude material was purified according to **GP3**. Purification by flash column chromatography on silica gel using cyclohexane afforded the title compound **4pa** (31 mg, 0.11 mmol, 44%) as a colorless oil. *R*<sub>f</sub> = 0.48 (cyclohexane). **<sup>1</sup>H NMR** (500 MHz, CDCl<sub>3</sub>): δ/ppm = 0.16 (s, 3H), 0.24 (s, 3H), 0.77 (t, *J* = 7.1 Hz, 3H), 1.05–1.28 (m, 4H), 1.66–1.80 (m, 2H), 2.22 (dd, *J* = 11.8 Hz, 3.8 Hz, 1H), 6.90–6.94 (m, 2H), 7.05–7.11 (m, 1H), 7.15–7.22 (m, 2H), 7.29–7.42 (m, 5H). **<sup>13</sup>C {<sup>1</sup>H} NMR** (126 MHz, CDCl<sub>3</sub>): δ/ppm = –5.1, –3.7, 14.0, 22.6, 29.1, 31.5, 36.7, 124.5, 127.7, 128.1 (2C), 129.0, 134.3, 138.0, 143.3. **<sup>29</sup>Si{<sup>1</sup>H} DEPT NMR** (99 MHz, CDCl<sub>3</sub>): δ/ppm = –2.22. **IR** (ATR):  $\tilde{\nu}/\text{cm}^{-1}$  = 2954, 2923, 2854, 1598, 1488, 1450, 1247, 1111, 905, 826, 731, 696. **HRMS** (APCI) calculated for C<sub>13</sub>H<sub>21</sub>Si<sup>+</sup> [M–C<sub>6</sub>H<sub>5</sub>]<sup>+</sup>: 205.1407; found: 205.1408.

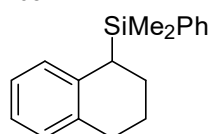**4qa**C<sub>18</sub>H<sub>22</sub>Si

M = 266.46 g/mol

**Dimethyl(phenyl)(1,2,3,4-tetrahydronaphthalen-1-yl)silane (4qa).** Prepared from *N,N,N*-trimethyl-1,2,3,4-tetrahydronaphthalen-1-aminium trifluoromethanesulfonate (**1q**, 85 mg, 0.25 mmol, 1.00 equiv) according to **GP2**. The crude material was purified according to **GP3**. Purification by flash column chromatography on silica gel using cyclohexane afforded the title compound **4qa** (33 mg, 0.12 mmol, 50%) as an off-white oil. *R*<sub>f</sub> = 0.53 (cyclohexane). **<sup>1</sup>H NMR** (500 MHz, CDCl<sub>3</sub>): δ/ppm = 0.27 (s, 3H), 0.29 (s, 3H), 1.58–1.96 (m, 4H), 2.49–2.74 (m, 3H), 6.79–6.86 (m, 1H), 6.94–7.04 (m, 3H), 7.29–7.43 (m, 5H). **<sup>13</sup>C {<sup>1</sup>H} NMR** (126 MHz, CDCl<sub>3</sub>): δ/ppm = –3.3, –3.0, 22.1, 25.1, 29.0, 29.6, 124.2, 125.2, 127.8, 128.6, 129.0, 129.3, 134.2, 136.7, 138.9 (2C). **<sup>29</sup>Si{<sup>1</sup>H} DEPT NMR** (99 MHz, CDCl<sub>3</sub>): δ/ppm = –0.77. **IR** (ATR):  $\tilde{\nu}/\text{cm}^{-1}$  = 3012, 2927, 2852, 1597, 1485, 1426, 1247, 1110, 809, 730, 697. **HRMS** (APCI) calculated for C<sub>18</sub>H<sub>21</sub>Si<sup>+</sup> [M–H]<sup>+</sup>: 265.1407; found: 265.1405.

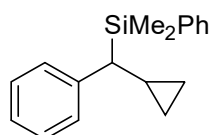**4ra**C<sub>18</sub>H<sub>22</sub>Si

M = 266.46 g/mol

**[Cyclopropyl(phenyl)methyl]dimethyl(phenyl)silane (4ra).** Prepared from 1-cyclopropyl-*N,N,N*-trimethyl-1-phenylmethanaminium trifluoromethanesulfonate (**1r**, 85 mg, 0.25 mmol, 1.00 equiv) according to **GP2**. The crude material was purified according to **GP3**. Purification by flash column chromatography on silica gel using cyclohexane afforded the title compound **4ra** (28 mg, 0.11 mmol, 42%) as a colorless oil. *R*<sub>f</sub> = 0.55 (cyclohexane). **<sup>1</sup>H NMR** (500 MHz, CDCl<sub>3</sub>): δ/ppm = –0.07 (m, 1H), 0.11 (m, 1H), 0.28 (s, 3H), 0.30 (s, 3H), 0.43 (m, 1H), 0.61 (m, 1H), 1.12 (m, 1H), 1.48 (d, *J* 11.0 Hz, 1H), 6.88–6.94 (m, 2H), 7.05–7.11 (m, 1H), 7.14–7.20 (m, 2H), 7.28–7.32 (m, 2H), 7.33–7.40 (m, 3H). **<sup>13</sup>C {<sup>1</sup>H} NMR** (126 MHz, CDCl<sub>3</sub>): δ/ppm = –4.2, –3.8, 5.3, 7.8, 12.1, 42.3, 124.5, 127.5, 127.8, 127.9, 129.1, 134.4, 137.8, 144.4. **<sup>29</sup>Si{<sup>1</sup>H} DEPT NMR** (99 MHz, CDCl<sub>3</sub>): δ/ppm = –1.88. **IR** (ATR):  $\tilde{\nu}/\text{cm}^{-1}$  = 3012, 2927, 2852, 1597, 1485, 1426, 1247, 1110, 809, 730, 697. **HRMS** (APCI) calculated for C<sub>12</sub>H<sub>17</sub>Si<sup>+</sup> [M–C<sub>6</sub>H<sub>5</sub>]<sup>+</sup>: 189.1101; found: 189.1094.

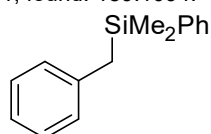**4ua**C<sub>15</sub>H<sub>18</sub>Si

M = 226.39 g/mol

## SUPPORTING INFORMATION

**Benzylidimethyl(phenyl)silane (4ua).** Prepared from *N,N,N*-trimethyl-1-phenylethan-1-aminium trifluoromethanesulfonate (**1u**, 85 mg, 0.25 mmol, 1.00 equiv) according to **GP2**. The crude material was purified according to **GP3**. Purification by flash column chromatography on silica gel using cyclohexane afforded the title compound **4ua** (42 mg, 0.18 mmol, 73%) as a colorless oil.  $R_f = 0.43$  (cyclohexane).  $^1\text{H NMR}$  (500 MHz,  $\text{CDCl}_3$ ):  $\delta/\text{ppm} = 0.26$  (s, 6H), 2.32 (s, 2H), 6.91–6.98 (m, 2H), 7.04–7.11 (m, 1H), 7.15–7.22 (m, 2H), 7.32–7.40 (m, 3H), 7.44–7.50 (m, 2H).  $^{13}\text{C } \{^1\text{H}\}$  NMR (126 MHz,  $\text{CDCl}_3$ ):  $\delta/\text{ppm} = -3.3$ , 26.3, 124.2, 127.9, 128.2, 128.5, 129.2, 133.9, 138.6, 139.8.  $^{29}\text{Si}\{^1\text{H}\}$  DEPT NMR (99 MHz,  $\text{CDCl}_3$ ):  $\delta/\text{ppm} = -3.77$ . IR (ATR):  $\tilde{\nu}/\text{cm}^{-1} = 3022$ , 2954, 2890, 1598, 1491, 1425, 1247, 1111, 903, 823, 694. HRMS (APCI) calculated for  $\text{C}_9\text{H}_{13}\text{Si}^+$  [ $\text{M}-\text{C}_6\text{H}_5$ ] $^+$ : 149.0781; found: 149.0781. The spectroscopic data are in accordance with those reported.<sup>[S13]</sup>

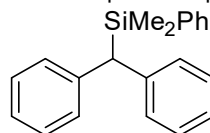**4ua**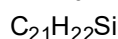

M = 302.49 g/mol

**Benzhydryldimethyl(phenyl)silane (4wa).** Prepared from *N,N,N*-trimethyl-1-(naphthalen-2-yl)ethan-1-aminium trifluoromethane-sulfonate (**1w**, 94 mg, 0.25 mmol, 1.00 equiv) according to **GP2**. Purification by flash column chromatography on silica gel using cyclohexane afforded the title compound **4wa** (38 mg, 0.13 mmol, 50%) as a colorless oil.  $R_f = 0.18$  (cyclohexane).  $^1\text{H NMR}$  (500 MHz,  $\text{CDCl}_3$ ):  $\delta/\text{ppm} = 0.30$  (s, 6H), 3.74 (s, 1H), 6.03–7.15 (m, 6H), 7.18–7.23 (m, 4H), 7.27–7.30 (m, 4H), 7.32–7.37 (m, 1H).  $^{13}\text{C } \{^1\text{H}\}$  NMR (126 MHz,  $\text{CDCl}_3$ ):  $\delta/\text{ppm} = -3.0$ , 45.9, 125.3, 127.7, 128.3, 129.1, 129.2, 134.6, 137.7, 142.4.  $^{29}\text{Si}\{^1\text{H}\}$  DEPT NMR (99 MHz,  $\text{CDCl}_3$ ):  $\delta/\text{ppm} = -2.89$ . IR (ATR):  $\tilde{\nu}/\text{cm}^{-1} = 3022$ , 2955, 1595, 1491, 1446, 1248, 1111, 1031, 806, 734, 696. HRMS (APCI) calculated for  $\text{C}_{15}\text{H}_{17}\text{Si}^+$  [ $\text{M}-\text{C}_6\text{H}_5$ ] $^+$ : 225.1094; found: 225.1102.

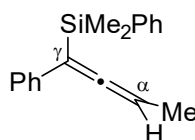**6**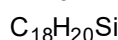

M = 264.44 g/mol

**Dimethyl(phenyl)(1-phenylbuta-1,2-dien-1-yl)silane (6).** Prepared from *N,N,N*-trimethyl-4-phenylbut-3-yn-2-aminium (**5**, 84 mg, 0.25 mmol, 1.00 equiv) according to **GP2**. The crude material was purified according to **GP3**. Purification by flash column chromatography on silica gel using cyclohexane afforded the title compound **6** (32 mg, 0.12 mmol, 48%,  $\alpha:\gamma = 1:>99$ ) as a yellow oil.  $R_f = 0.38$  (cyclohexane).  $^1\text{H NMR}$  (500 MHz,  $\text{CDCl}_3$ ):  $\delta/\text{ppm} = 0.45$  (s, 6H), 1.76 (d,  $J = 7.0$  Hz, 3H), 5.19 (q,  $J = 7.0$  Hz, 1H), 7.09–7.14 (m, 1H), 7.17–7.24 (m, 4H), 7.33–7.39 (m, 3H), 7.56–7.63 (m, 2H).  $^{13}\text{C } \{^1\text{H}\}$  NMR (126 MHz,  $\text{CDCl}_3$ ):  $\delta/\text{ppm} = -1.8$ ,  $-1.7$ , 13.4, 82.2, 98.0, 126.0, 127.7, 127.8, 128.3, 129.1, 133.9, 137.6, 138.7, 210.7.  $^{29}\text{Si}\{^1\text{H}\}$  DEPT NMR (99 MHz,  $\text{CDCl}_3$ ):  $\delta/\text{ppm} = -9.02$ . IR (ATR):  $\tilde{\nu}/\text{cm}^{-1} = 3050$ , 2955, 1925, 1733, 1593, 1426, 1250, 1116, 1048, 788, 728, 695. HRMS (APCI) calculated for  $\text{C}_{12}\text{H}_{15}\text{Si}^+$  [ $\text{M}-\text{C}_6\text{H}_5$ ] $^+$ : 187.0938; found: 187.0940. The spectroscopic data are in accordance with those reported.<sup>[S14]</sup>

**(R)-Dimethyl(phenyl)(1-phenylbuta-1,2-dien-1-yl)silane [(R)-6].** Prepared from (*S*)-*N,N,N*-trimethyl-4-phenylbut-3-yn-2-aminium [(*S*)-**5**, 84 mg, 0.25 mmol, 1.00 equiv] according to **GP2**. The crude material was purified according to **GP3**. Purification by flash column chromatography on silica gel using cyclohexane afforded the title compound (*S*)-**6** (37 mg, 0.14 mmol, 56%) as a light-yellow oil. **Optical rotation:**  $[\alpha] = +10$  ( $c = 0.6$ ,  $\text{CHCl}_3$ , 20% ee). The enantiomeric excess of (*S*)-**6** was determined by HPLC analysis on a chiral stationary phase (Daicel Chiralcel OJ-H column, column temperature 20 °C, solvent *n*-heptane:isopropanol = 99:1, flow rate 0.7 mL/min,  $\lambda = 230$  nm):  $t_R = 7.2$  min for (*R*)-**6**,  $t_R = 9.3$  min for (*S*)-**6**. The absolute configuration was assigned by comparison with the reported optical rotation of (*R*)-**6**.<sup>[S14]</sup>

## SUPPORTING INFORMATION

## 6. Silylation of an Allylic Ammonium Salt

The following reaction was not included in the original manuscript. Hence we were only able to synthesize primary allylic ammonium salts, the stereospecificity of this reaction could not be investigated yet. Efforts to synthesize an enantioenriched secondary allylic substrate are still ongoing in our laboratory.

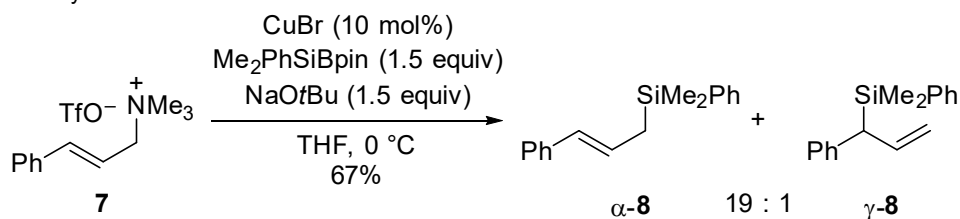

**Cinnamyl dimethyl(phenyl)silane (8)**. Prepared from (*E*)-*N,N,N*-trimethyl-3-phenylprop-2-en-1-aminium trifluoromethanesulfonate (**7**, 81 mg, 0.25 mmol, 1.00 equiv) according to **GP2**. The crude material was purified according to **GP3**. Purification by flash column chromatography on silica gel using cyclohexane afforded the title compound **7** (42 mg, 0.17 mmol, 67%,  $\alpha$ : $\gamma$  = 19:1) as an off-white oil. *R<sub>f</sub>* = 0.42 (cyclohexane). **<sup>1</sup>H NMR** (500 MHz, CDCl<sub>3</sub>):  $\delta$ /ppm = 0.31 (s, 6H), 1.89 (d, *J* = 6.9 Hz, 2H), 6.15–6.28 (m, 2H), 7.11–7.19 (m, 1H), 7.23–7.28 (m, 4H), 7.33–7.39 (m, 3H), 7.49–7.56 (m, 2H). Selected signals for the  $\gamma$ -isomer:  $\delta$ /ppm = 0.24 (s, 3H), 0.26 (s, 3H), 3.14 (d, *J* = 9.6 Hz, 1H), 4.86–4.96 (m, 2H), 6.03–6.14 (m, 1H). **<sup>13</sup>C {<sup>1</sup>H} NMR** (126 MHz, CDCl<sub>3</sub>):  $\delta$ /ppm = -3.2, 23.2, 125.7, 126.4, 127.3, 128.0, 128.5, 129.1, 129.2, 133.8, 138.5, 138.7. **<sup>29</sup>Si {<sup>1</sup>H} DEPT NMR** (99 MHz, CDCl<sub>3</sub>):  $\delta$ /ppm = -4.06. **IR** (ATR):  $\tilde{\nu}$ /cm<sup>-1</sup> = 2953, 2921, 2850, 1702, 1596, 1425, 1249, 1113, 826, 729, 693. **HRMS** (APCI) calculated for C<sub>17</sub>H<sub>20</sub>Si<sup>+</sup> [M+H]<sup>+</sup>: 253.1407; found: 253.1404. The spectroscopic data are in accordance with those reported.<sup>[S15]</sup>



7. Assignment of the Absolute Configuration of Dimethyl(phenyl)(1-phenylethyl)silane (**4aa**)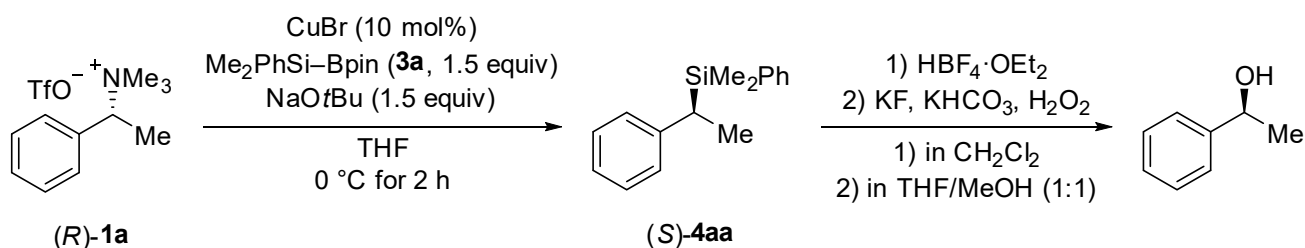

The TAMAO-FLEMING oxidation was conducted according to a modified literature procedure.<sup>[S16]</sup> A flame-dried SCHLENK-tube charged with crude **4aa** [24 mg, 0.10 mmol, resulting from reaction of enantioenriched (*R*)-**1a** under our standard conditions] was filled with nitrogen gas. At 25 °C, CH<sub>2</sub>Cl<sub>2</sub> (1.0 mL) and HBF<sub>4</sub>·OEt<sub>2</sub> (0.23 mL, 0.28 mmol) were sequentially added. The mixture was allowed to stir at rt for 16 h and was then quenched with water (5 mL). The aqueous layer was extracted with CH<sub>2</sub>Cl<sub>2</sub> (3 × 10 mL), dried over Na<sub>2</sub>SO<sub>4</sub>, filtered and the solvent was removed under reduced pressure. To the crude product in a 6-mL glass vial, THF (0.4 mL), MeOH (0.4 mL), KF (23, 0.40 mmol), KHCO<sub>3</sub> (100 mg, 1.00 mmol), and H<sub>2</sub>O<sub>2</sub> (113 mg, 1 mmol) were sequentially added at rt. The mixture was stirred for 24 h at 40 °C and then quenched by addition of saturated aqueous Na<sub>2</sub>S<sub>2</sub>O<sub>3</sub> solution (2 mL). The phases were separated, and the aqueous layer was extracted with CH<sub>2</sub>Cl<sub>2</sub> (3 × 10 mL). The combined organic layers were dried over Na<sub>2</sub>SO<sub>4</sub>, filtered, and the solvent was removed under reduced pressure. The crude product was purified by flash column chromatography, and the optical rotation value was measured: [α] = –35.2 (c = 0.5, CHCl<sub>3</sub>, e.r. 99.8:0.2). The reported optical rotation for (*S*)-phenylethanol is α = –39.0 (c = 1.0, CHCl<sub>3</sub>, e.r. 98.5:1.5).<sup>[S17]</sup> Therefore the absolute configuration of the silane is *S*, in accordance with the postulated S<sub>N</sub>2 mechanism.

## SUPPORTING INFORMATION

## 8. NMR Spectra

*N,N,N*-trimethyl-1-phenylethan-1-aminium trifluoromethanesulfonate (1a)<sup>1</sup>H NMR (500 MHz, DMSO-*d*<sub>6</sub>):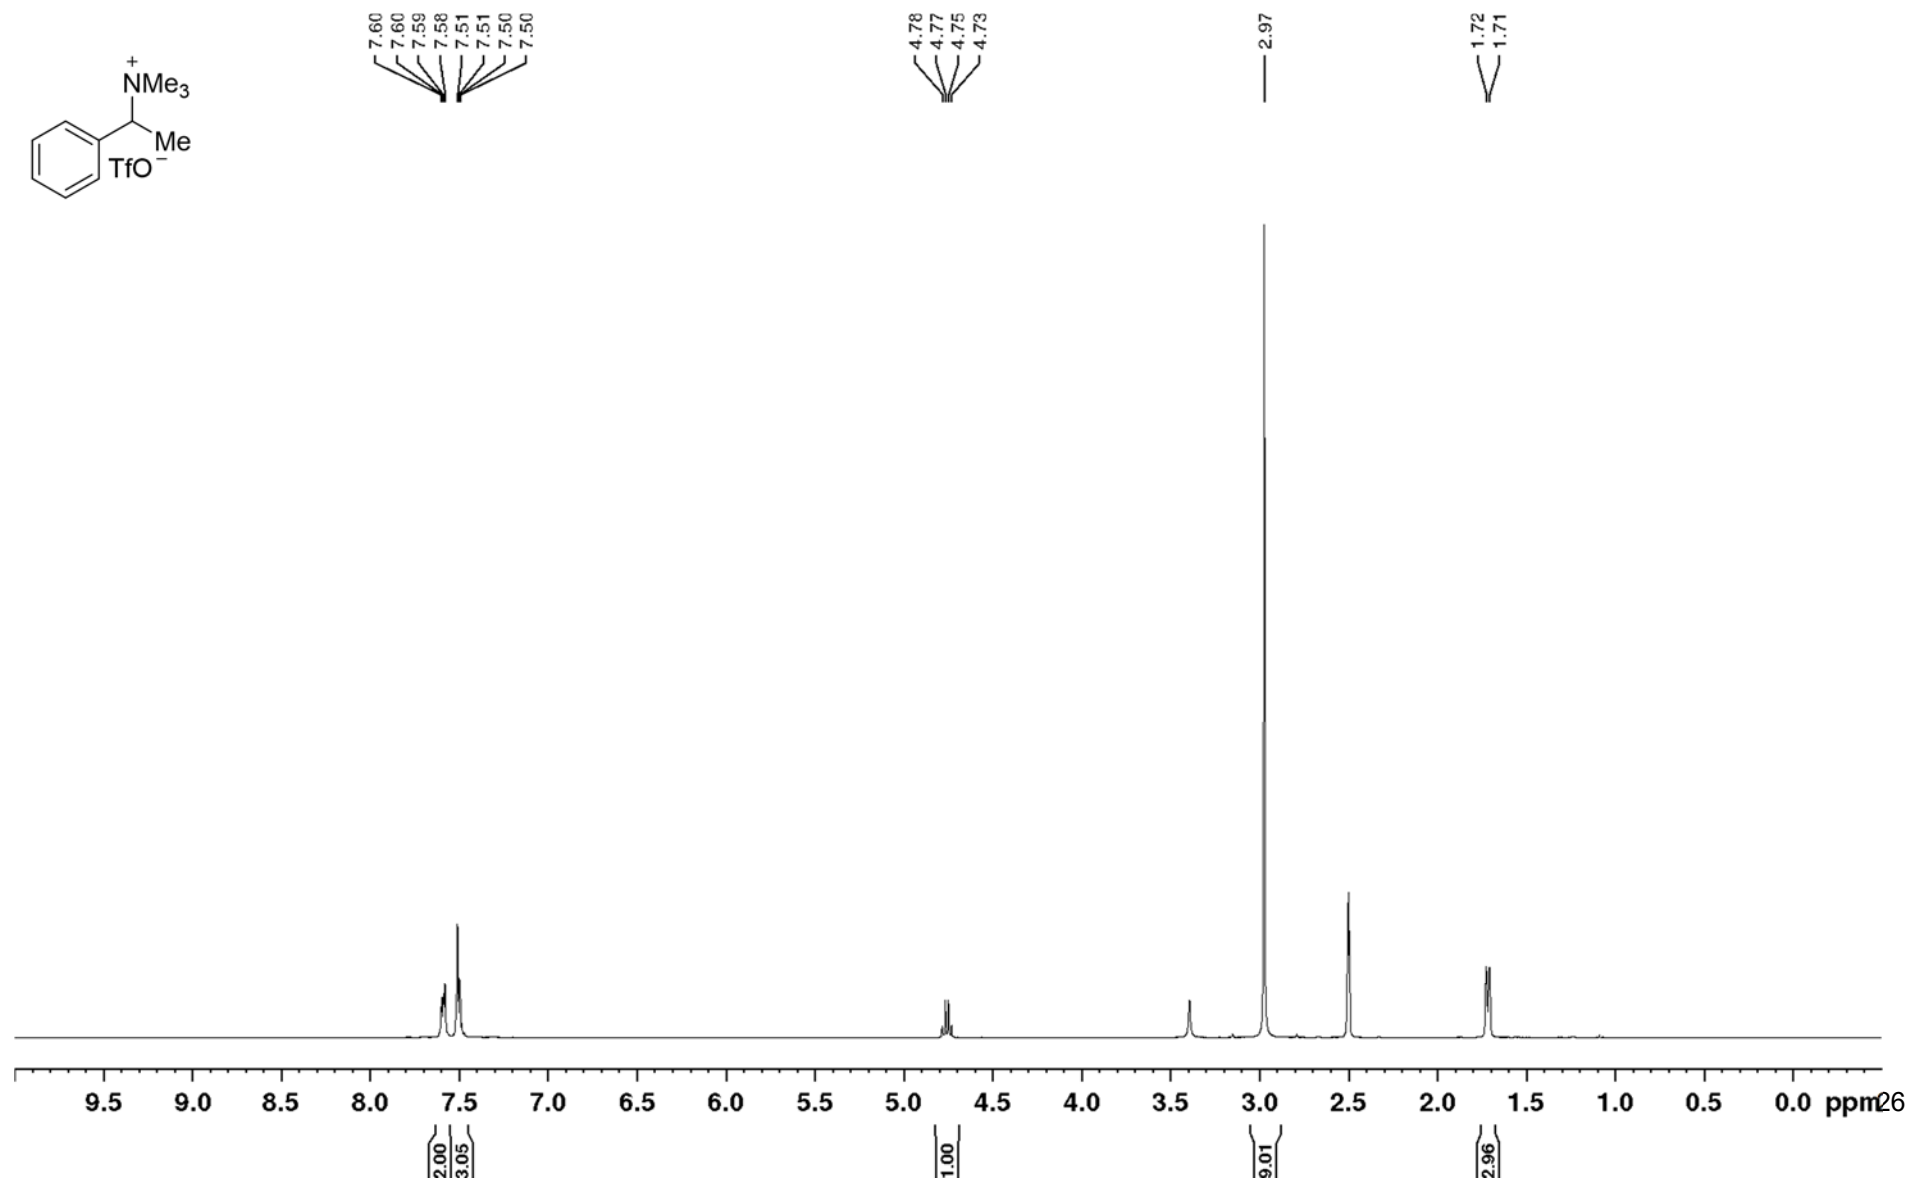

## SUPPORTING INFORMATION

 $^{13}\text{C}\{^1\text{H}\}$  NMR (126 MHz,  $\text{DMSO-}d_6$ ):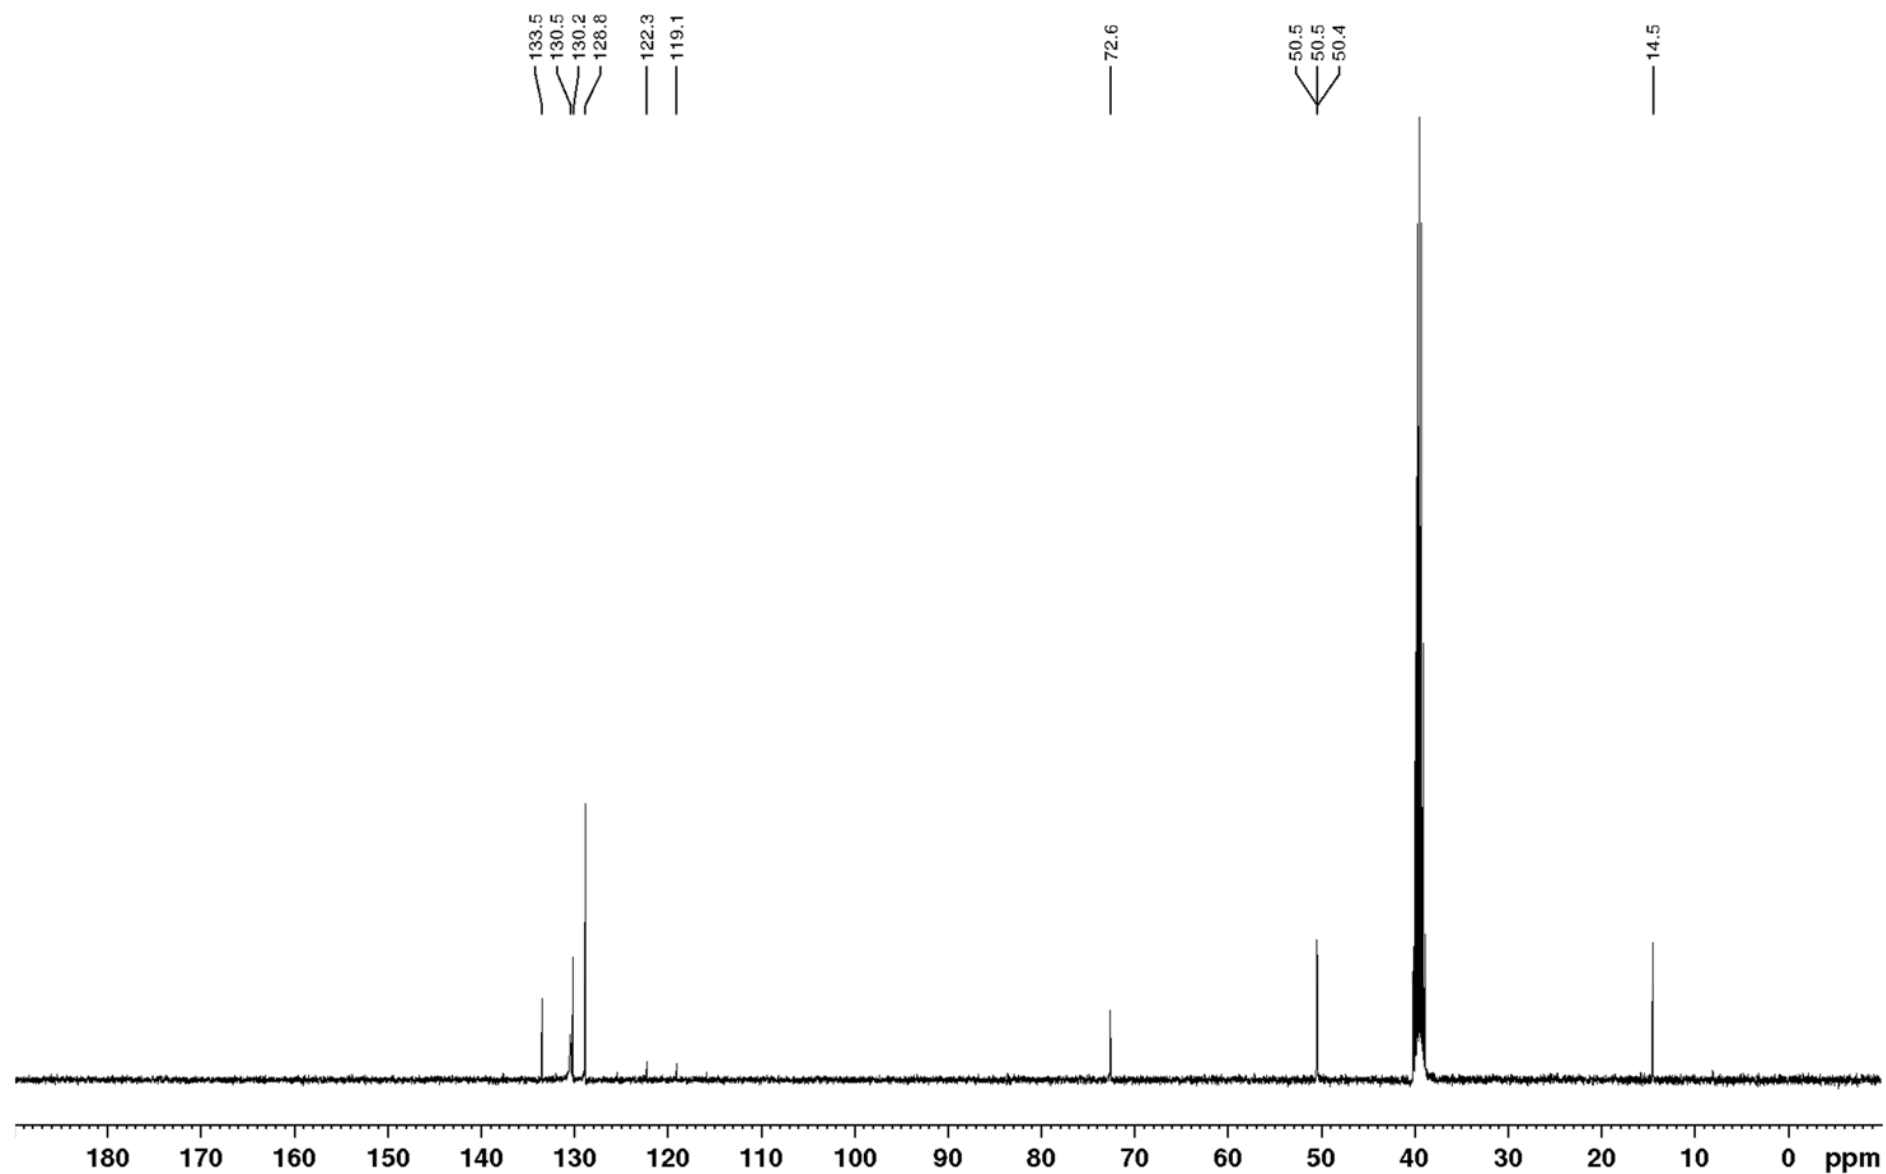

## SUPPORTING INFORMATION

 $^{13}\text{C}\{^{19}\text{F}\}$  DEPT NMR (176 MHz,  $\text{DMSO-}d_6$ ):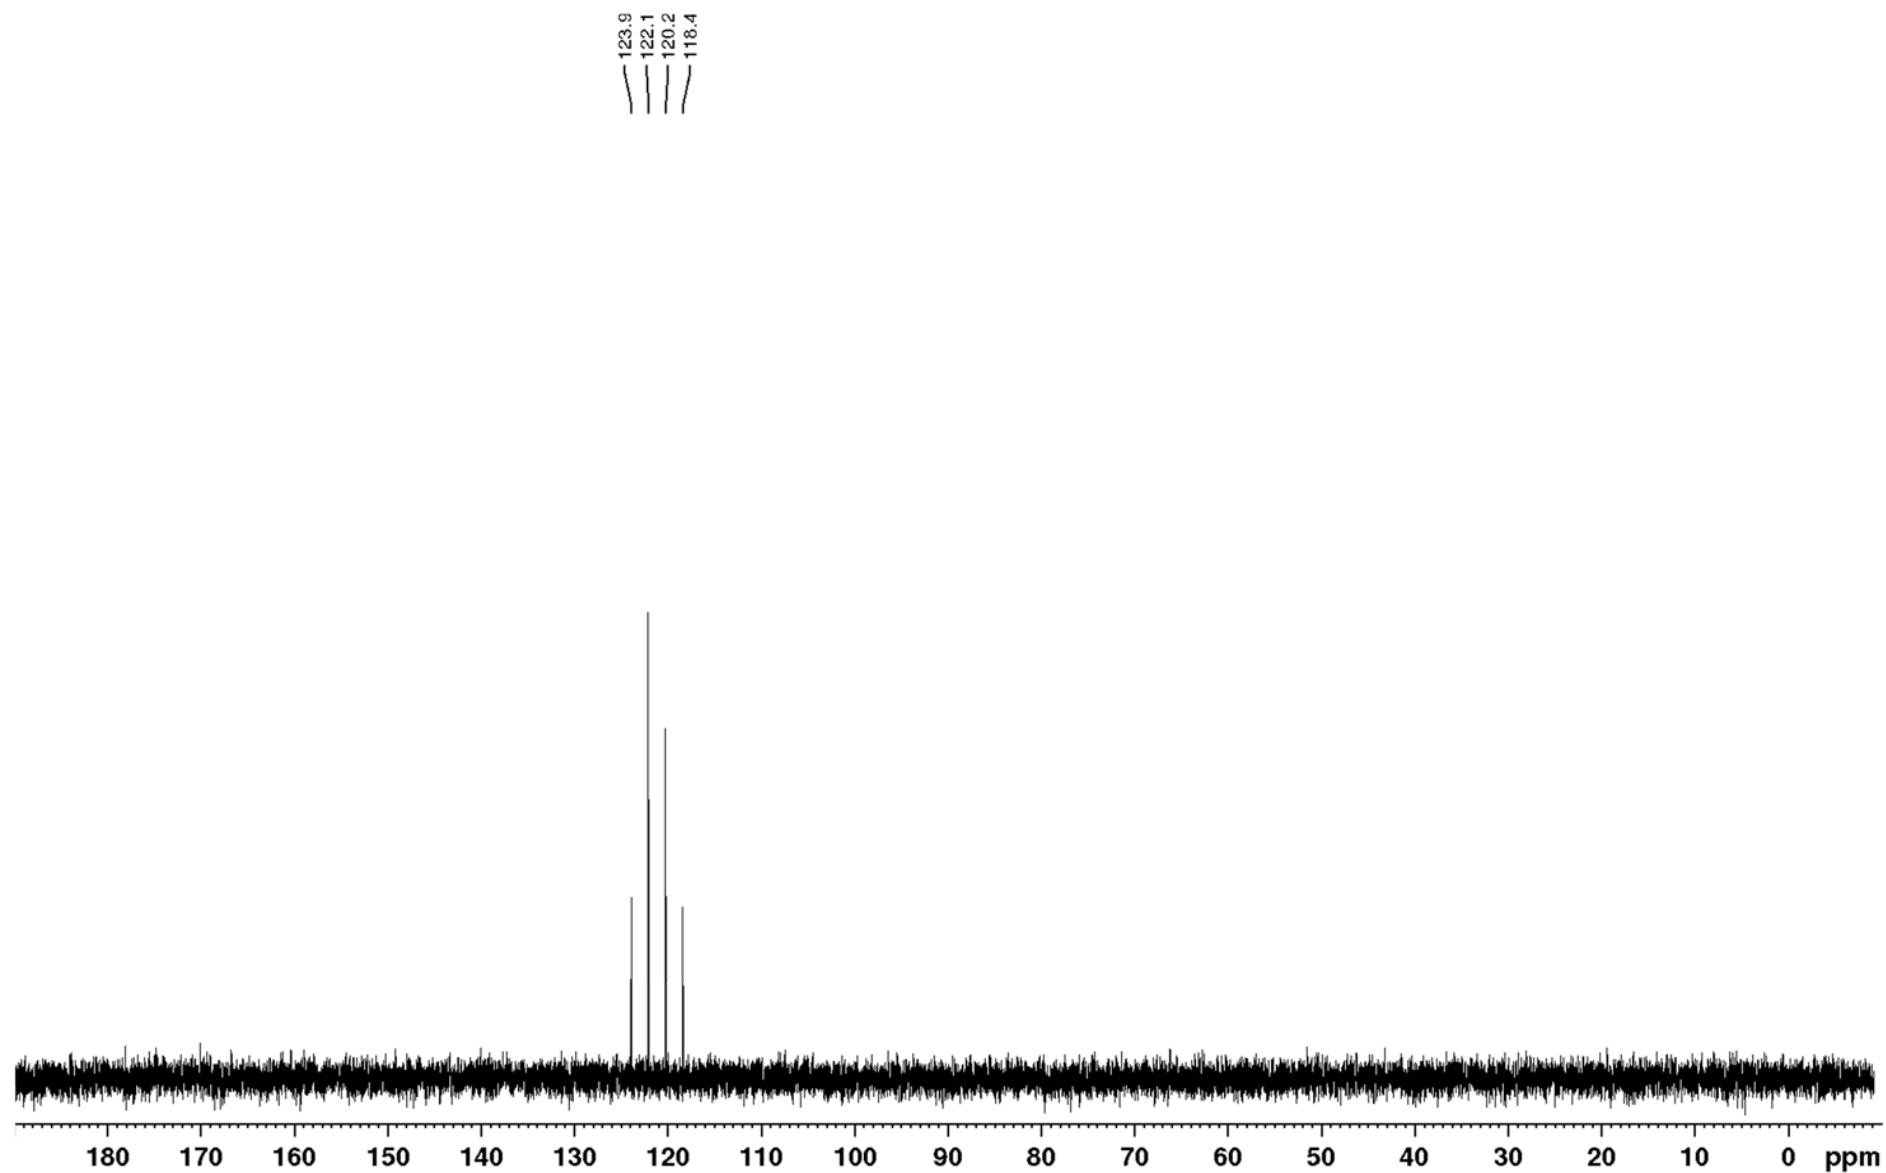

## SUPPORTING INFORMATION

 $^{19}\text{F}\{^1\text{H}\}$  NMR (659 MHz,  $\text{DMSO-}d_6$ ):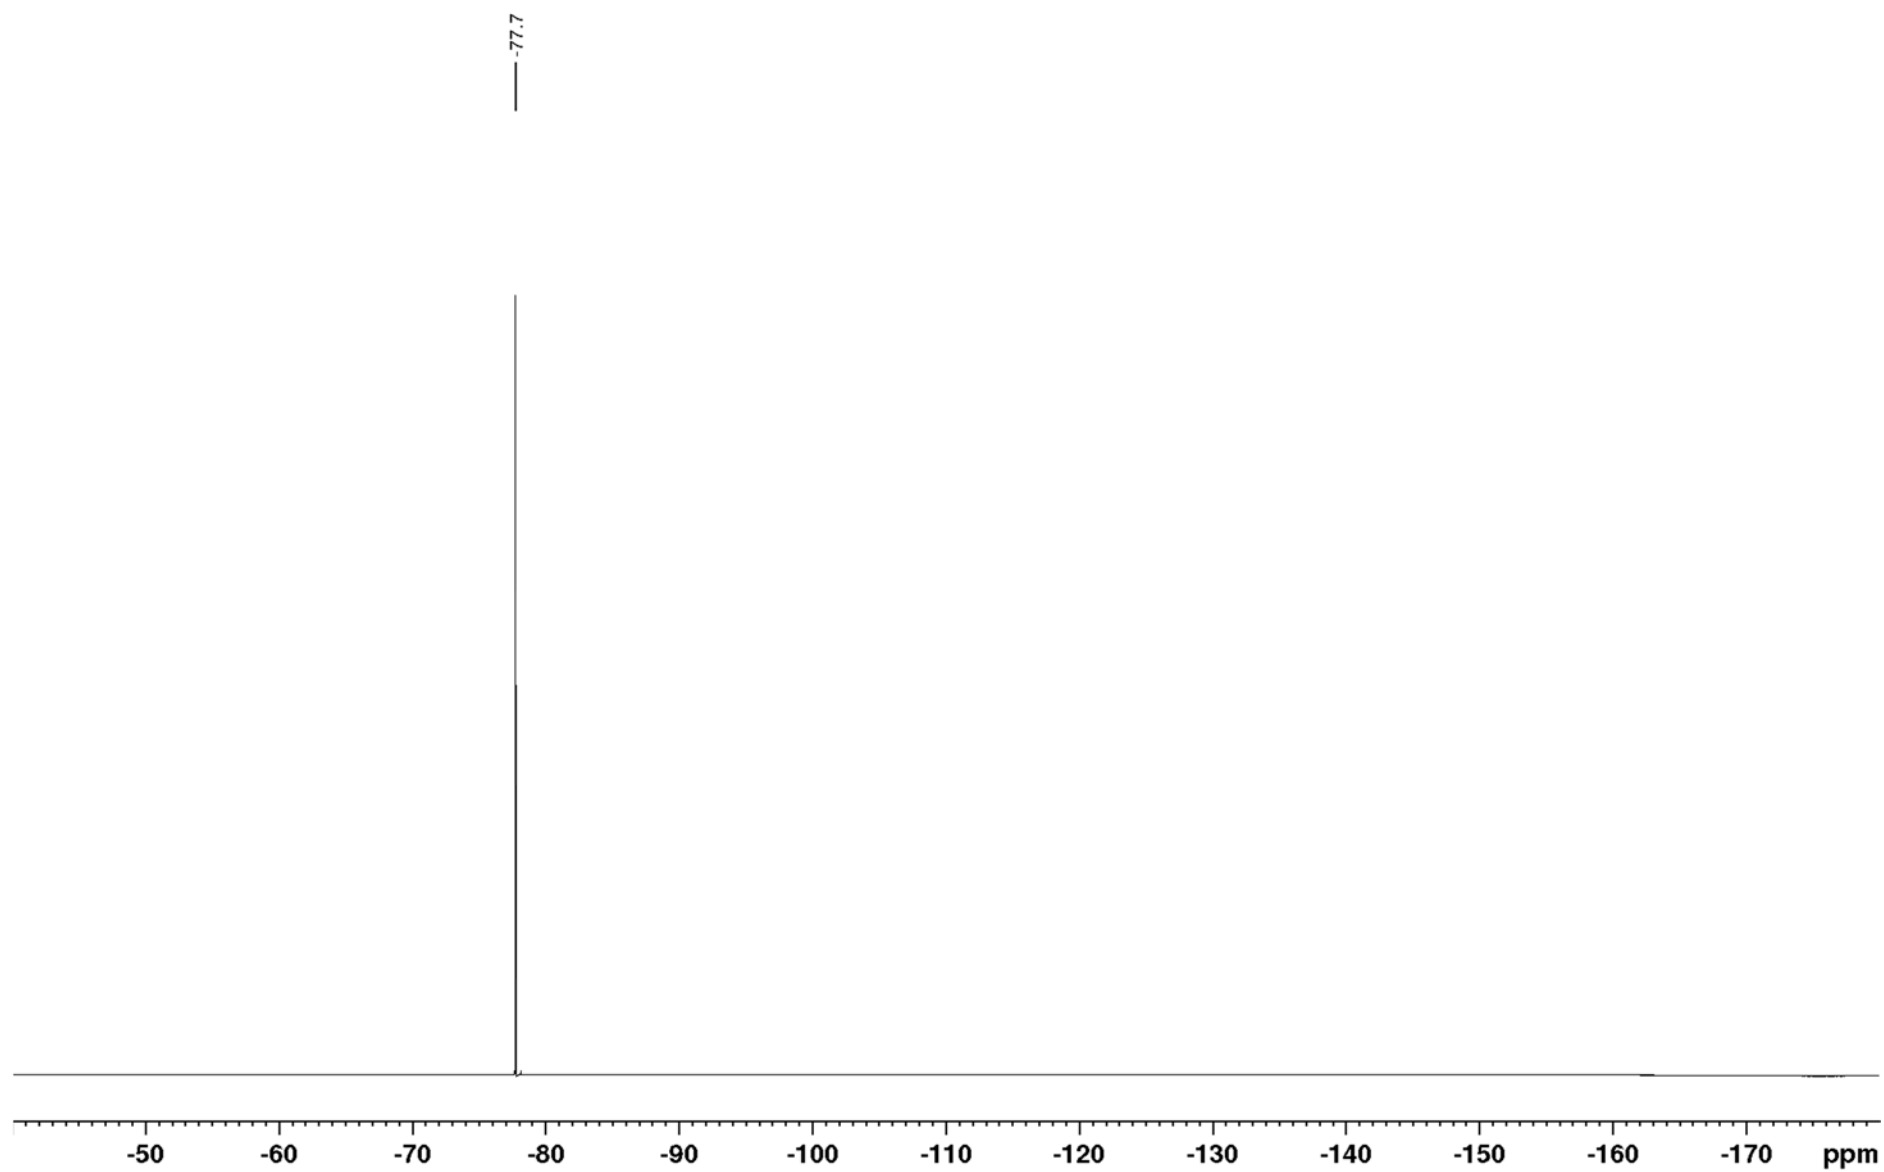

## SUPPORTING INFORMATION

***N,N,N*-trimethyl-1-(*p*-tolyl)ethan-1-aminium trifluoromethanesulfonate (1b)**<sup>1</sup>H NMR (400 MHz, DMSO-*d*<sub>6</sub>):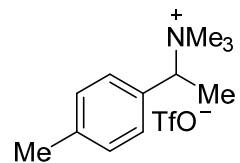

## SUPPORTING INFORMATION

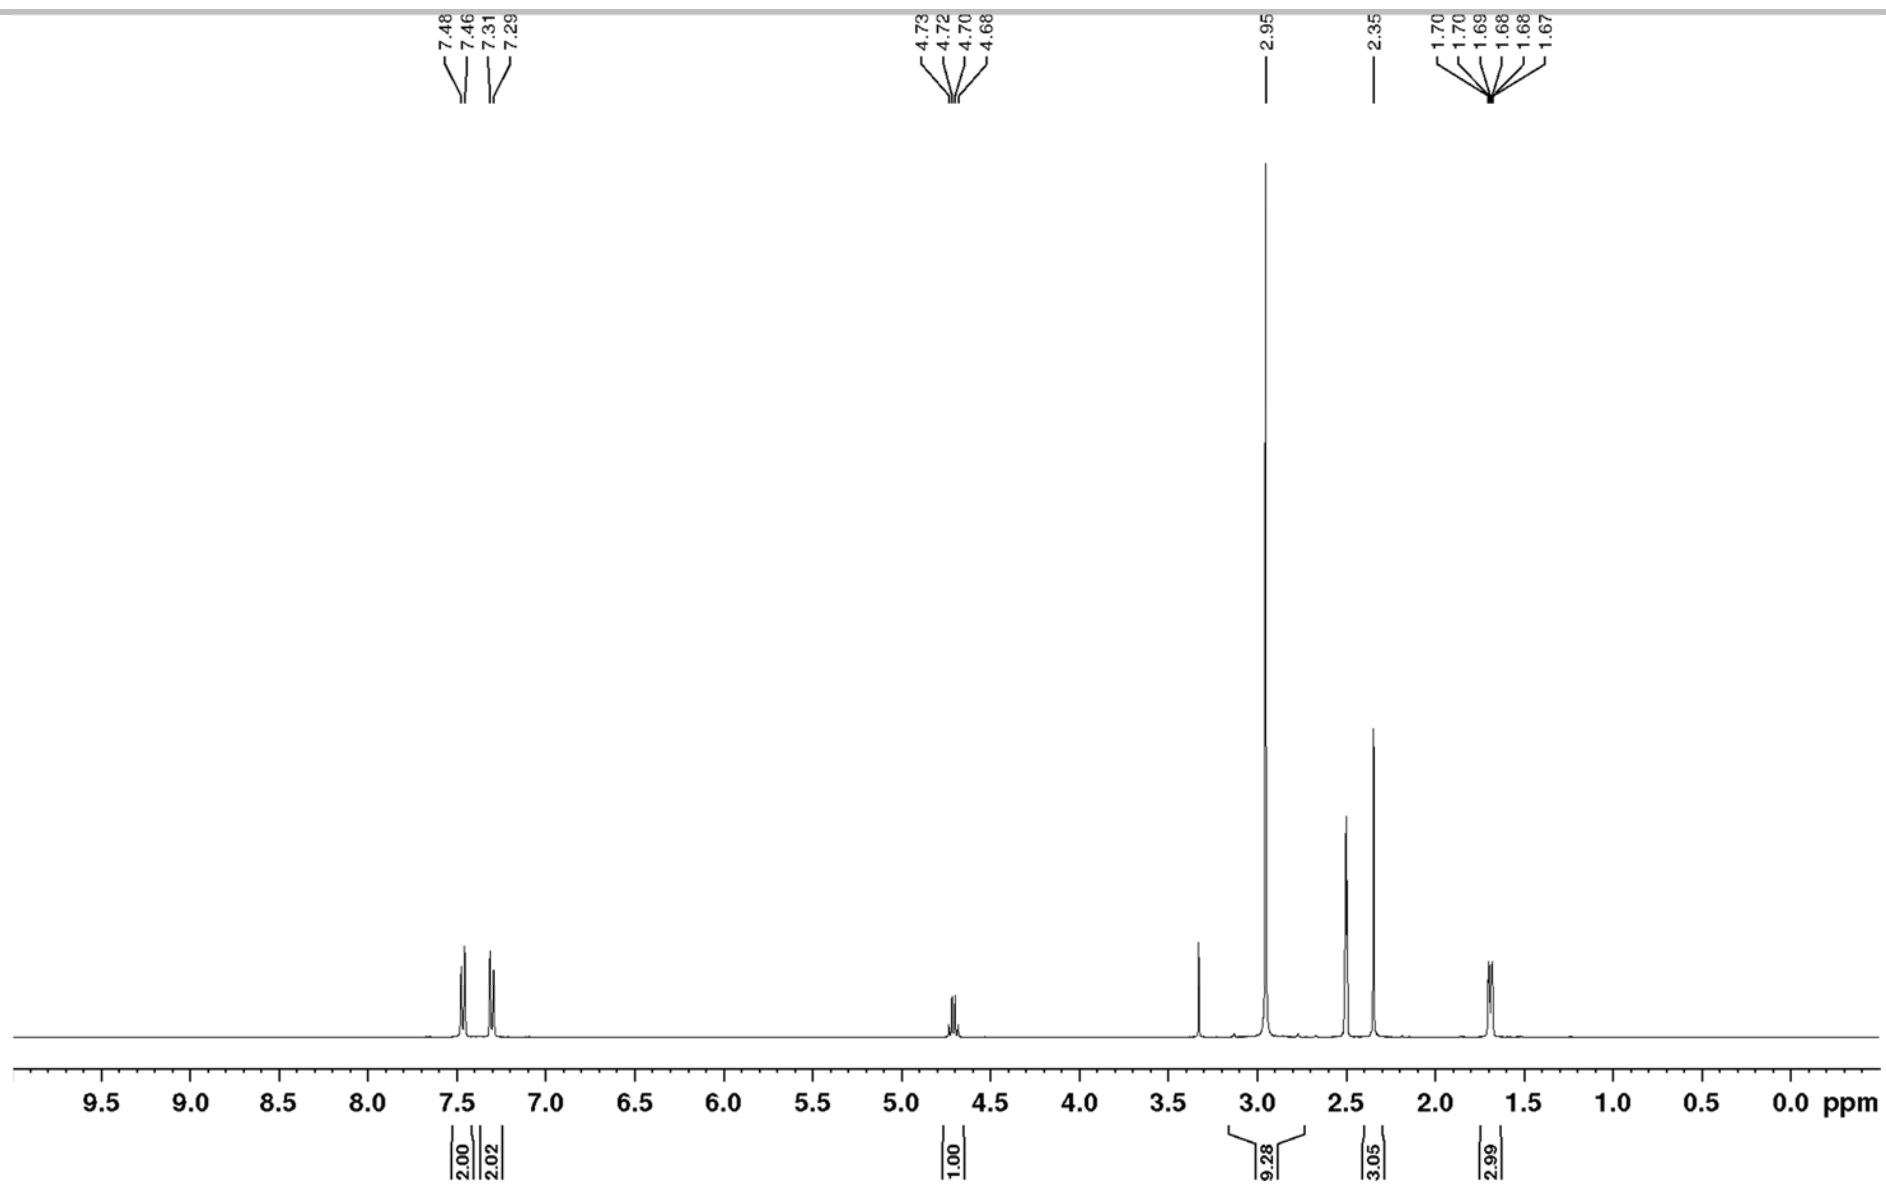

## SUPPORTING INFORMATION

 $^{13}\text{C}\{^1\text{H}\}$  NMR (101 MHz, DMSO- $d_6$ ):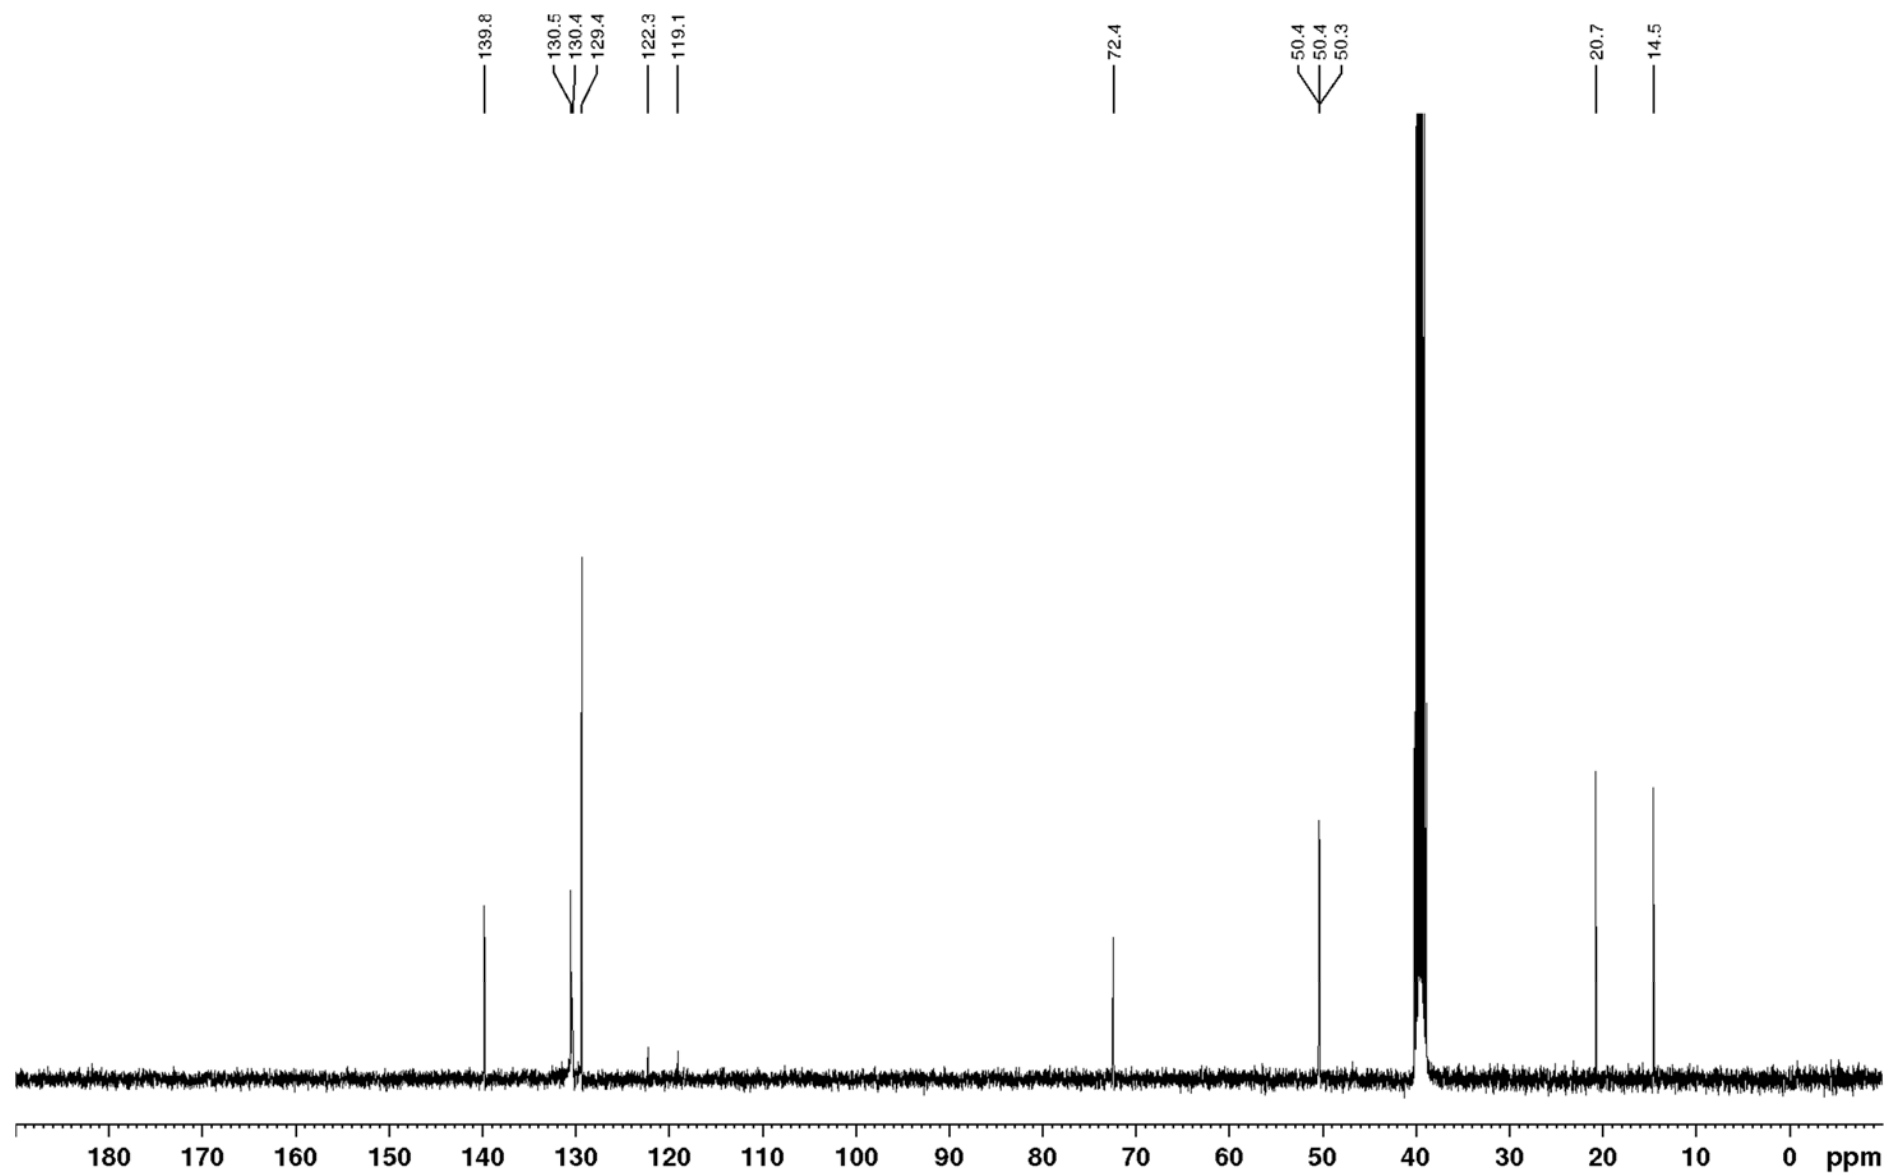



## SUPPORTING INFORMATION

 $^{13}\text{C}\{^{19}\text{F}\}$  DEPT NMR (126 MHz,  $\text{DMSO-}d_6$ ):

125.0  
122.4  
119.9  
117.3

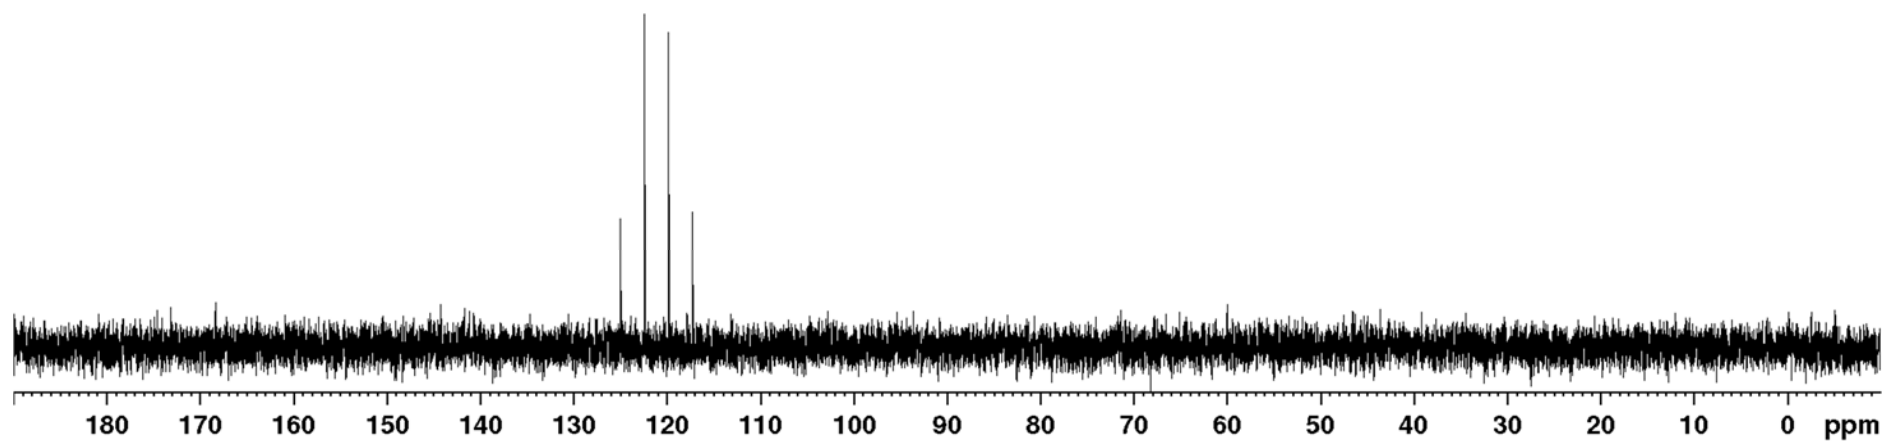

## SUPPORTING INFORMATION

 $^{19}\text{F}\{^1\text{H}\}$  NMR (471 MHz,  $\text{DMSO-}d_6$ ):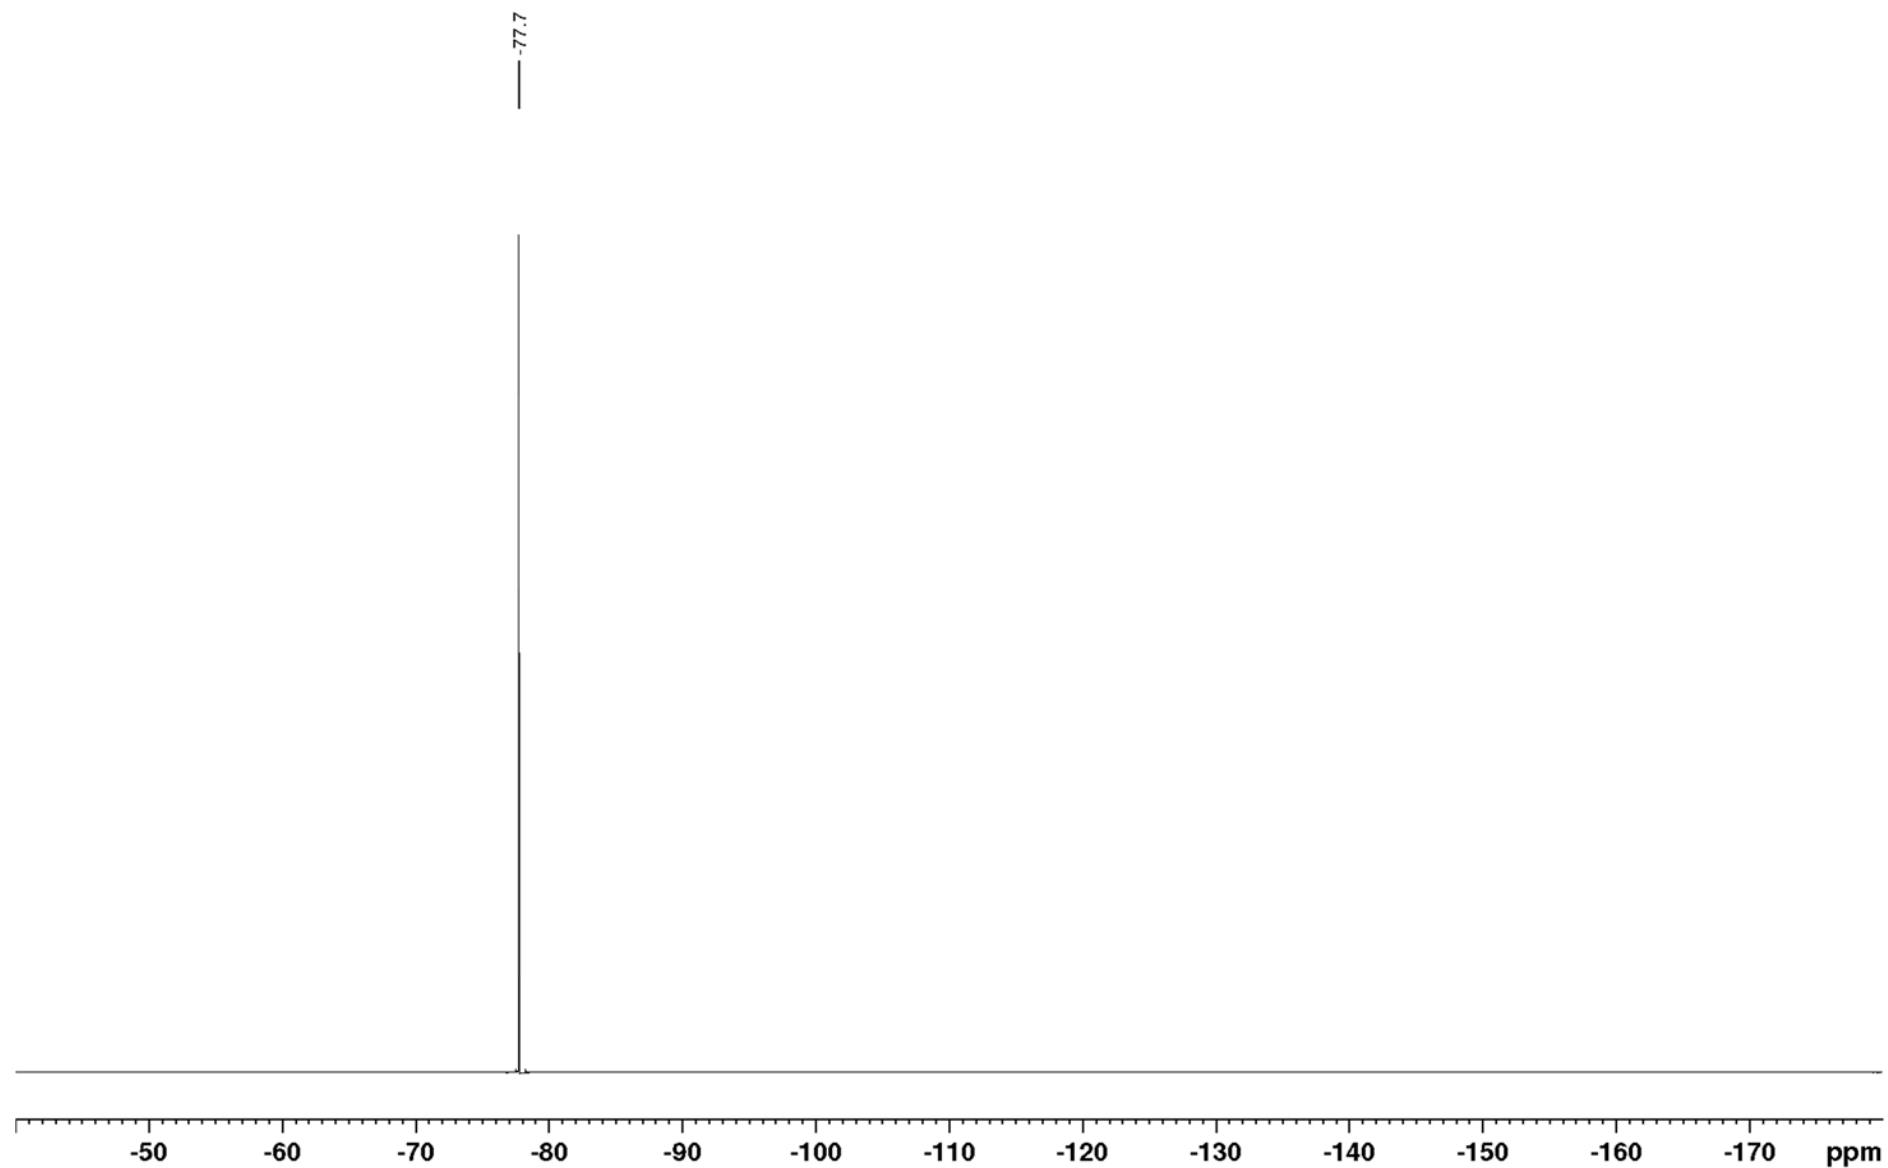

## SUPPORTING INFORMATION

***N,N,N*-trimethyl-1-(*m*-tolyl)ethan-1-aminium trifluoromethanesulfonate (1c)**<sup>1</sup>H NMR (400 MHz, DMSO-*d*<sub>6</sub>):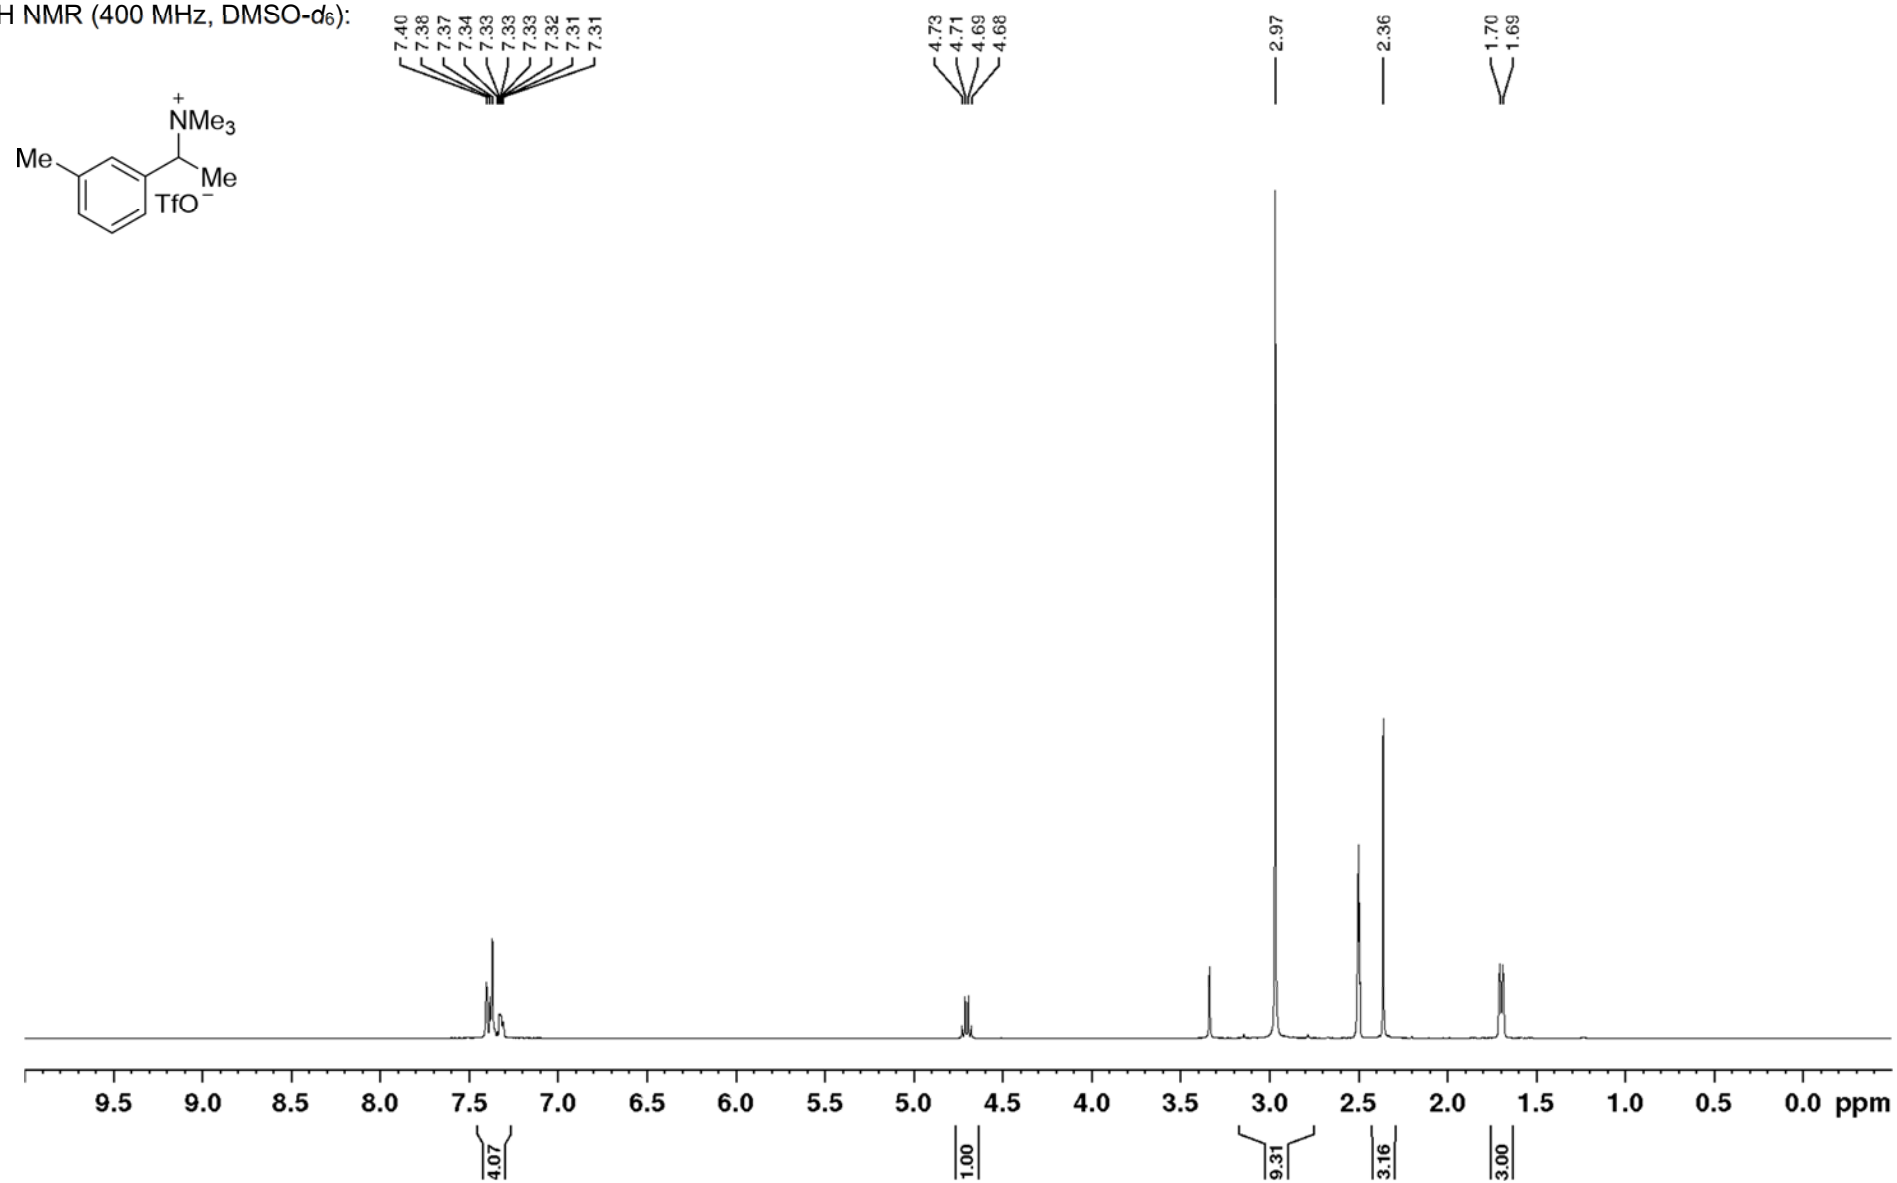

## SUPPORTING INFORMATION

 $^{13}\text{C}\{^1\text{H}\}$  NMR (101 MHz, DMSO- $d_6$ ):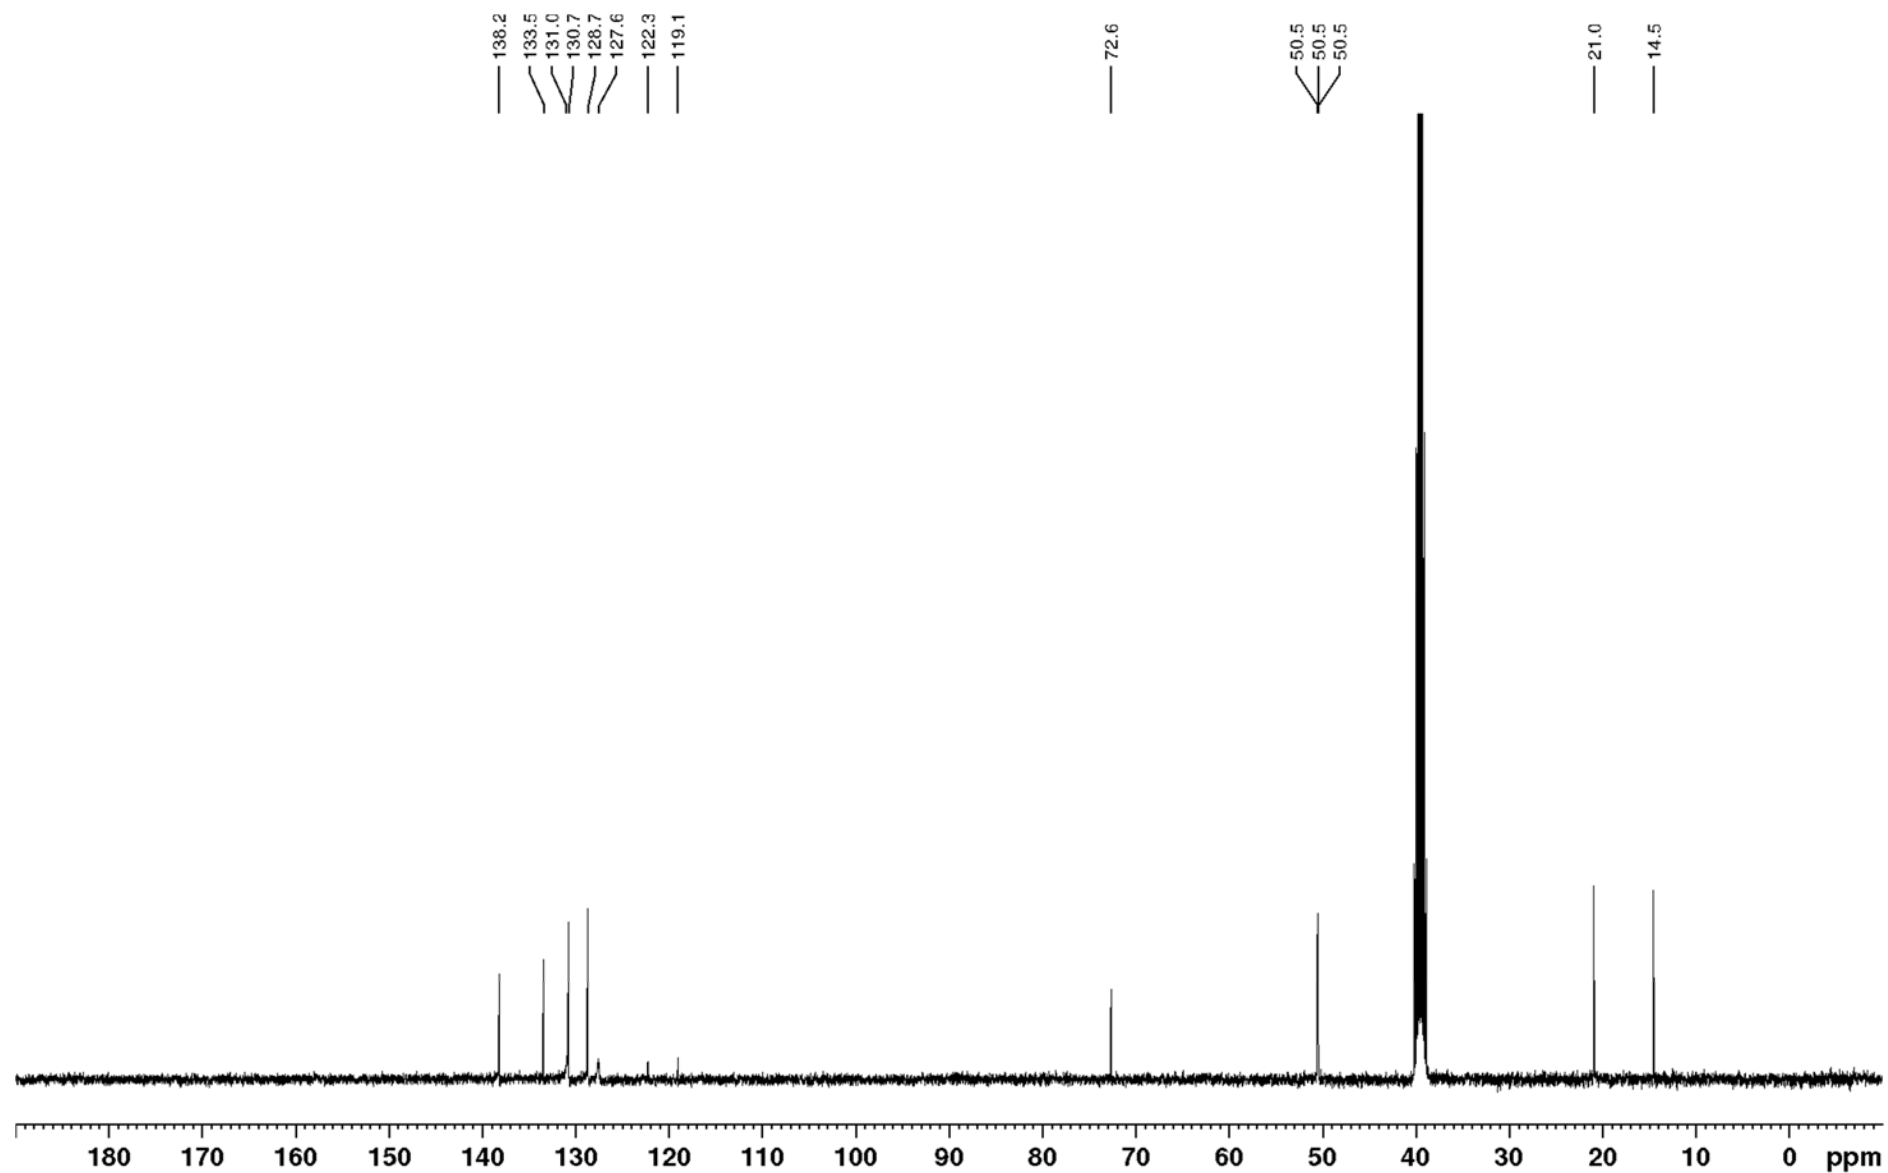

## SUPPORTING INFORMATION

 $^{13}\text{C}\{^{19}\text{F}\}$  DEPT NMR (126 MHz,  $\text{DMSO-}d_6$ ):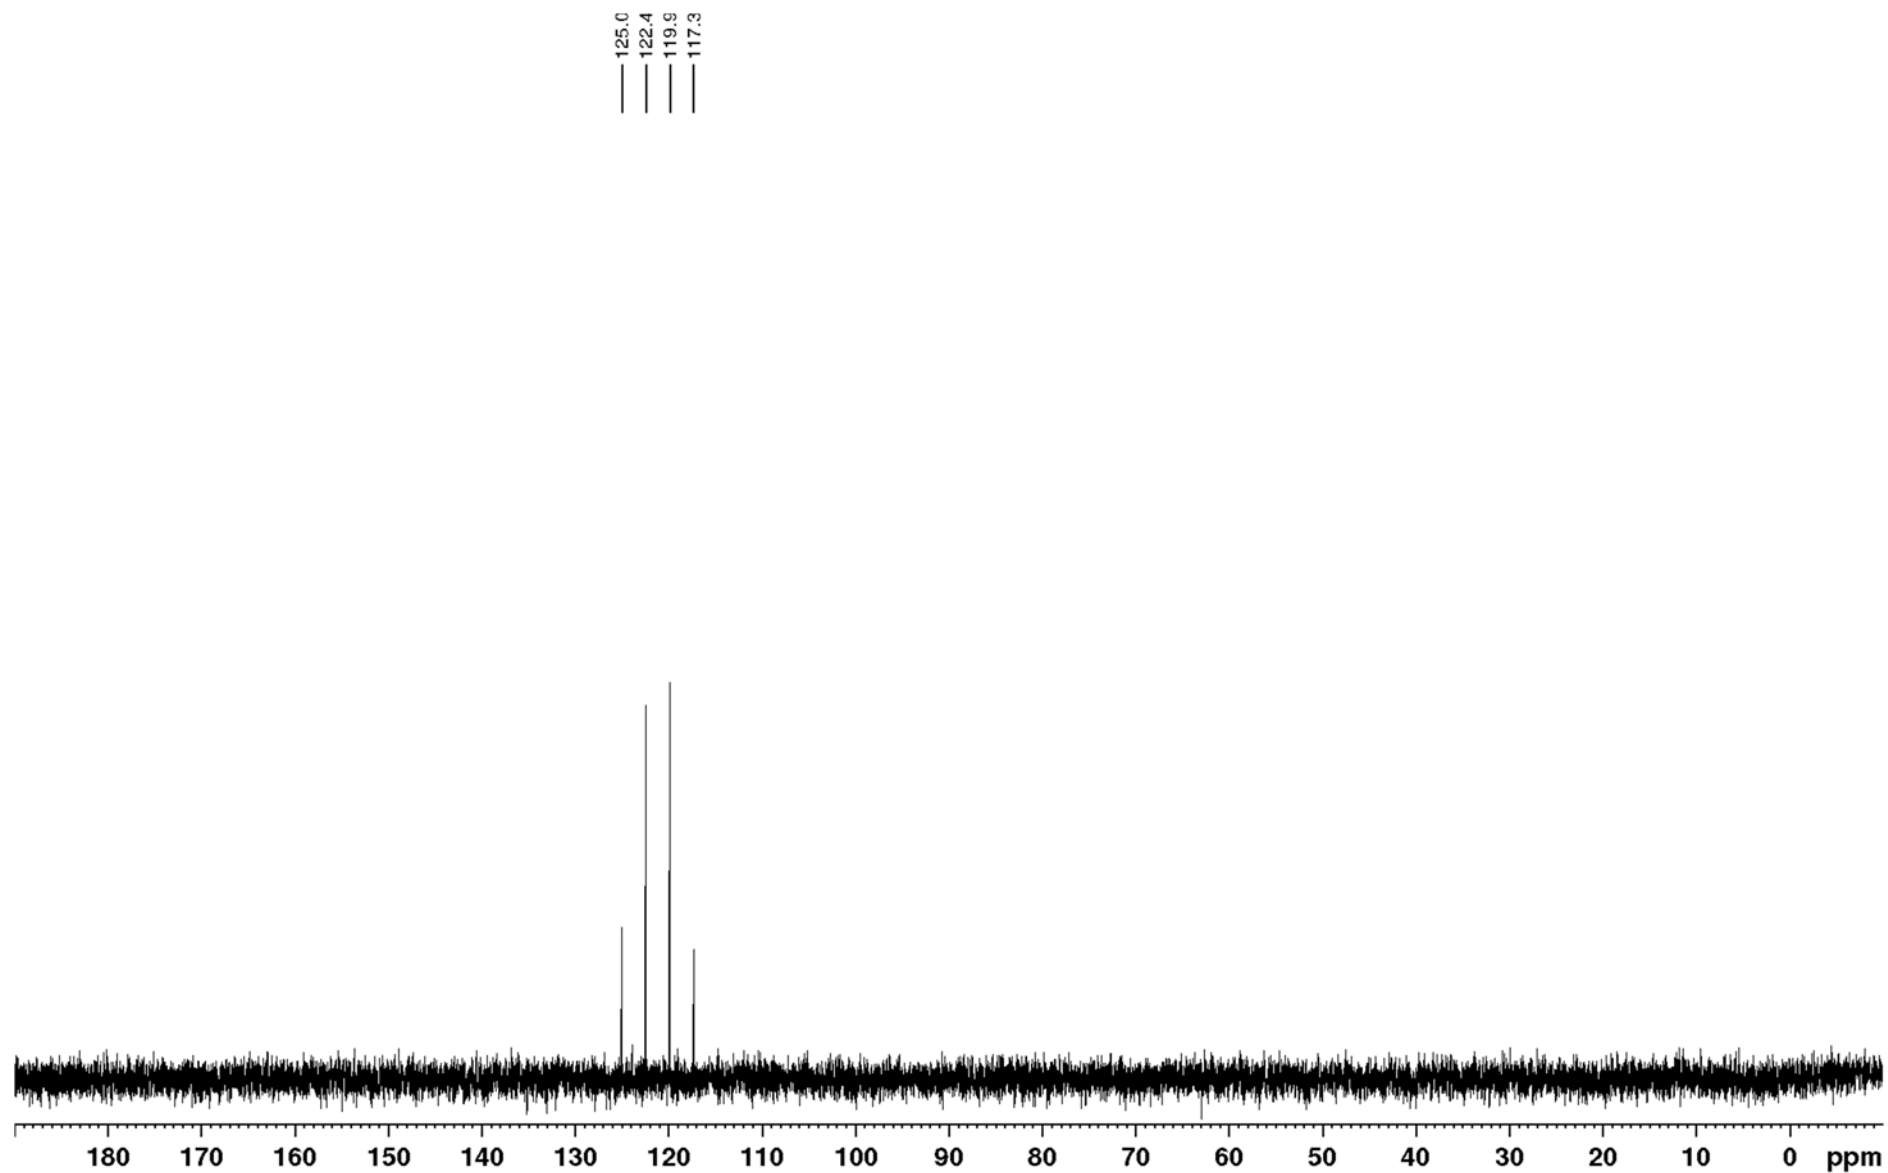

## SUPPORTING INFORMATION

 $^{19}\text{F}\{^1\text{H}\}$  NMR (471 MHz,  $\text{DMSO-}d_6$ ):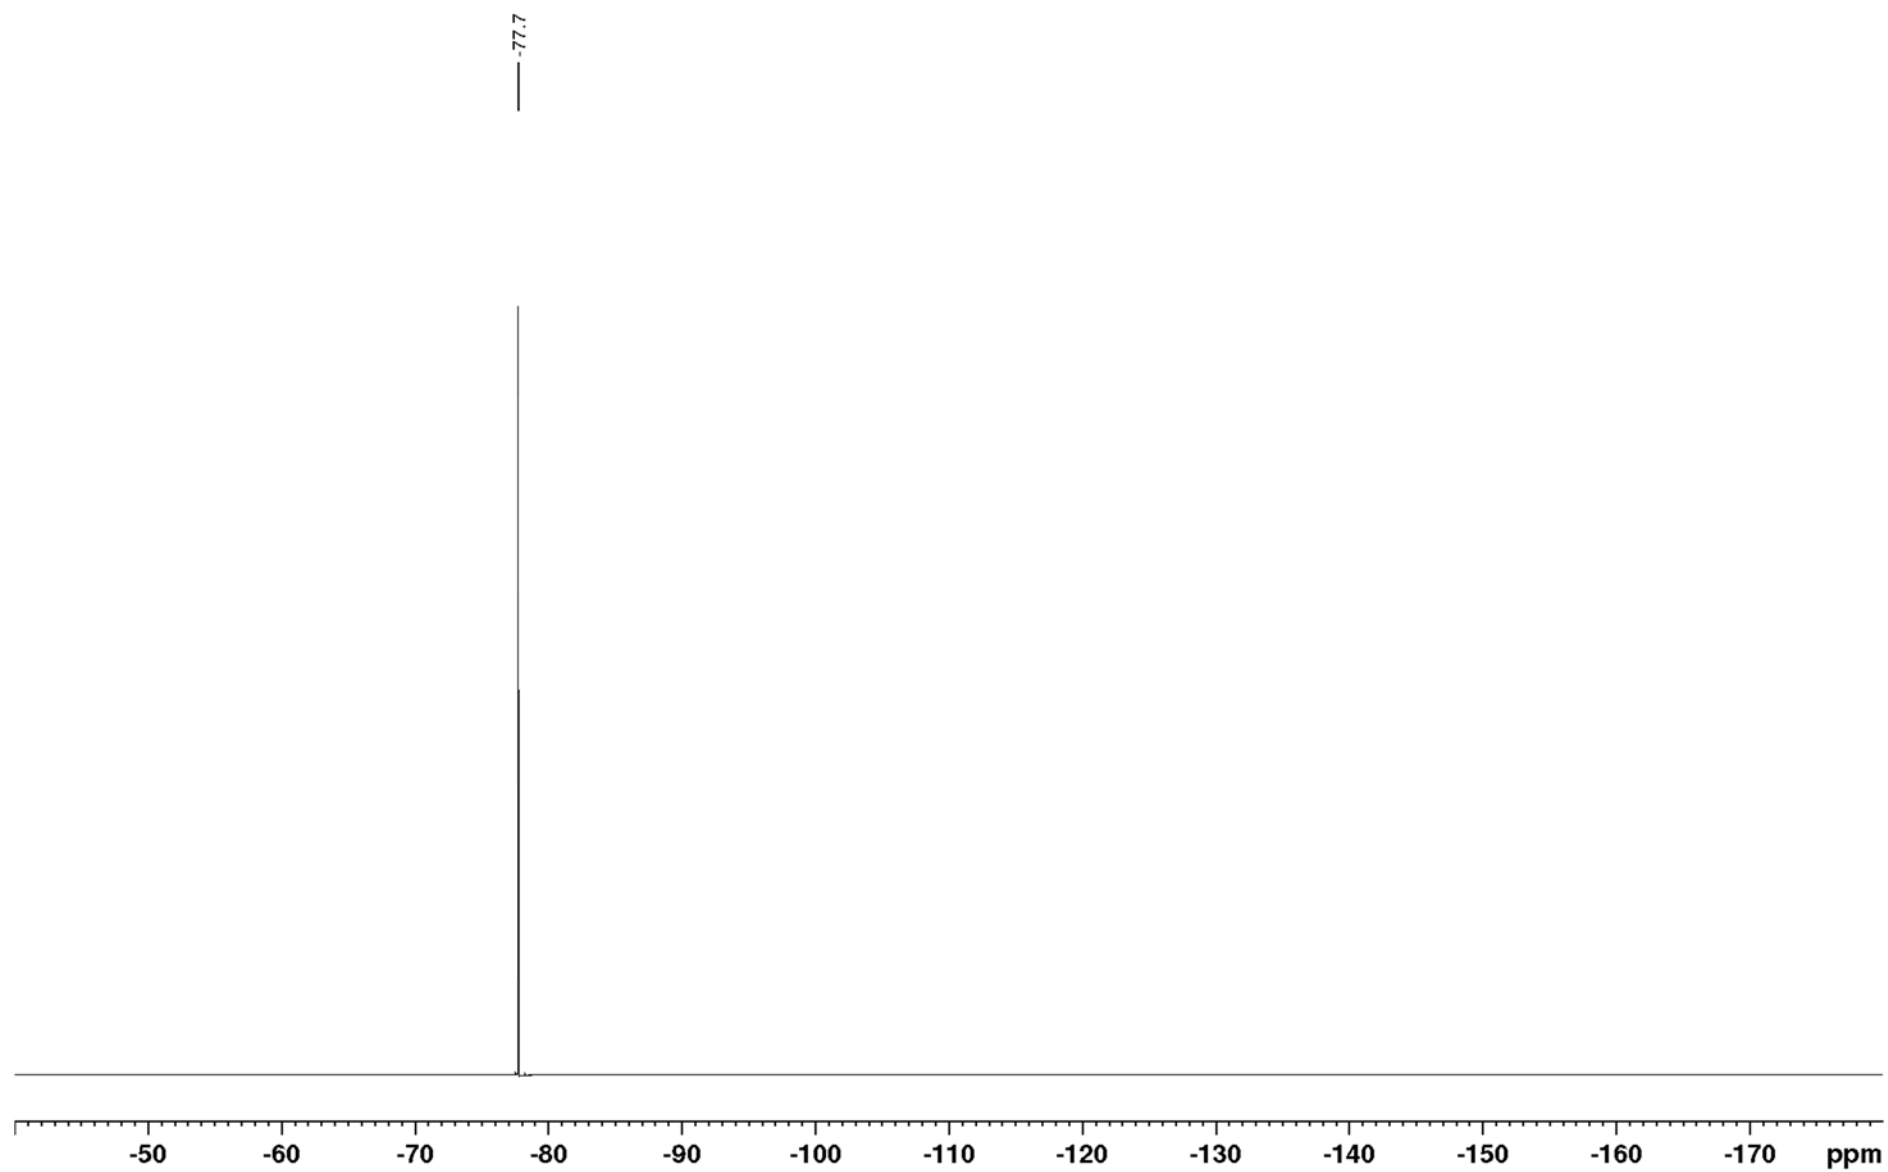

## SUPPORTING INFORMATION

***N,N,N*-trimethyl-1-(*m*-tolyl)ethan-1-aminium trifluoromethanesulfonate (1c)**<sup>1</sup>H NMR (400 MHz,7.62  
7.62  
7.60  
7.40  
7.40  
7.38  
7.37  
7.36  
7.35  
7.34  
7.33  
7.33  
7.32  
7.32  
7.314.98  
4.97  
4.95  
4.93

3.00

2.45

1.69

1.67

DMSO-*d*<sub>6</sub>):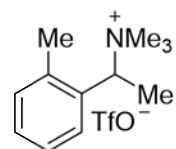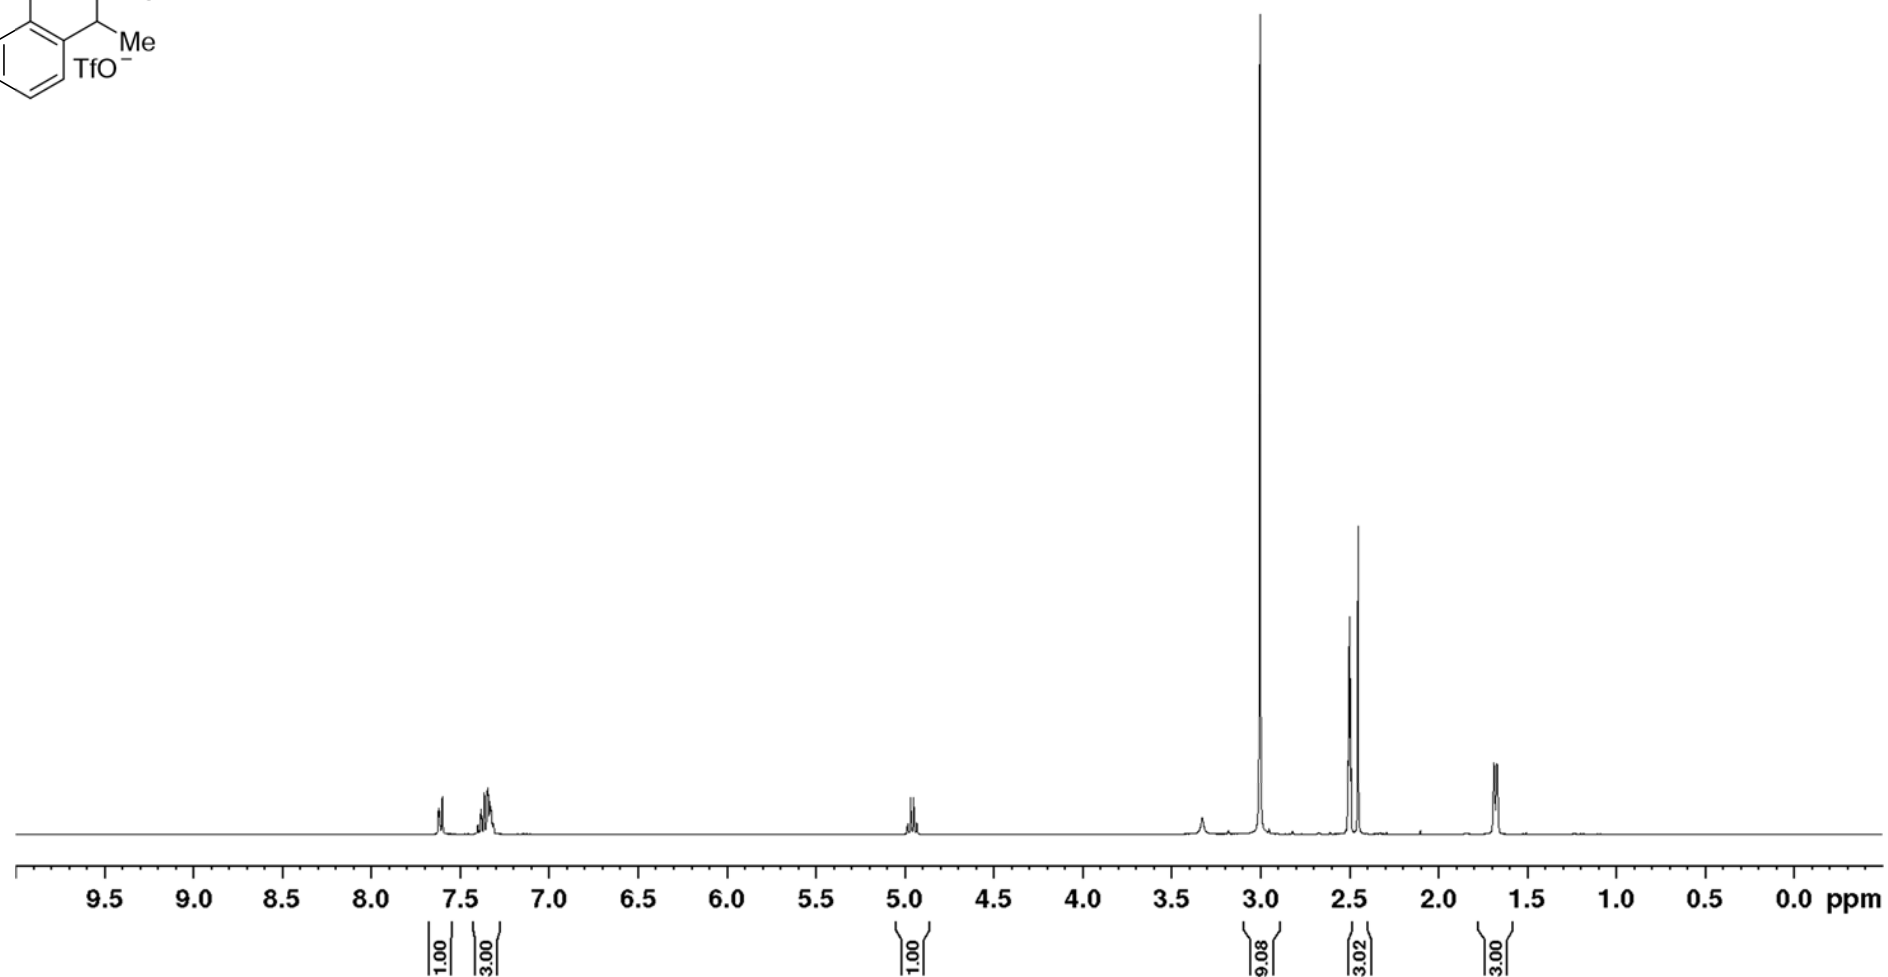

## SUPPORTING INFORMATION

 $^{13}\text{C}\{^1\text{H}\}$  NMR (101 MHz,  $\text{DMSO-}d_6$ ):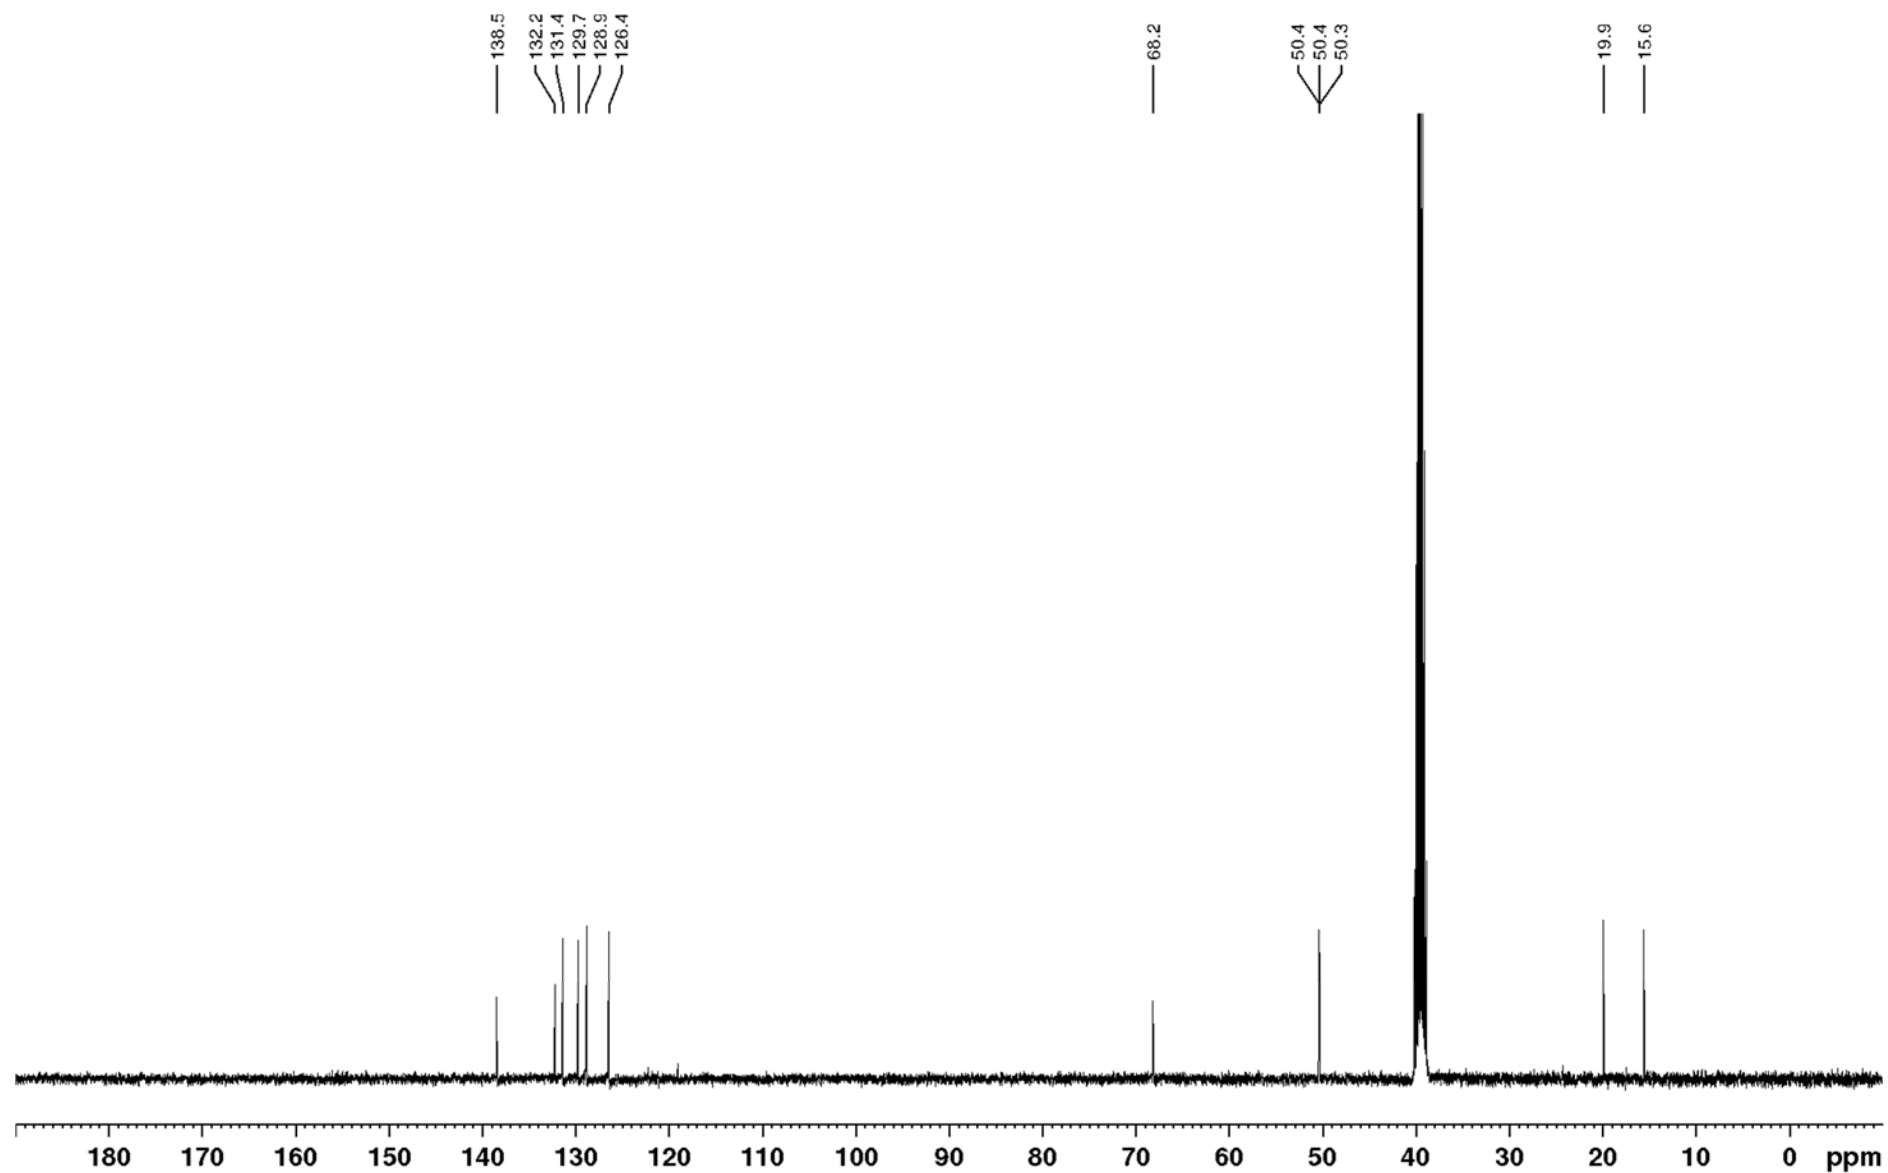



## SUPPORTING INFORMATION

 $^{13}\text{C}\{^{19}\text{F}\}$  DEPT NMR (126 MHz,  $\text{DMSO-}d_6$ ):

125.0  
122.4  
119.9  
117.3

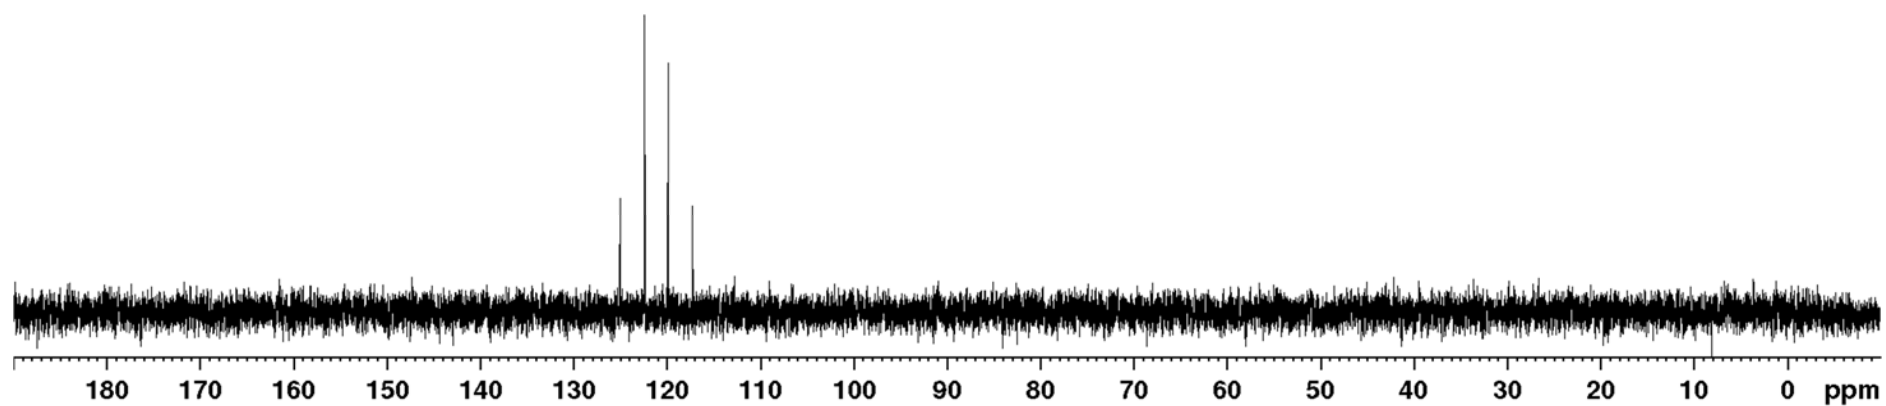

## SUPPORTING INFORMATION

 $^{19}\text{F}\{^1\text{H}\}$  NMR (471 MHz,  $\text{DMSO-}d_6$ ):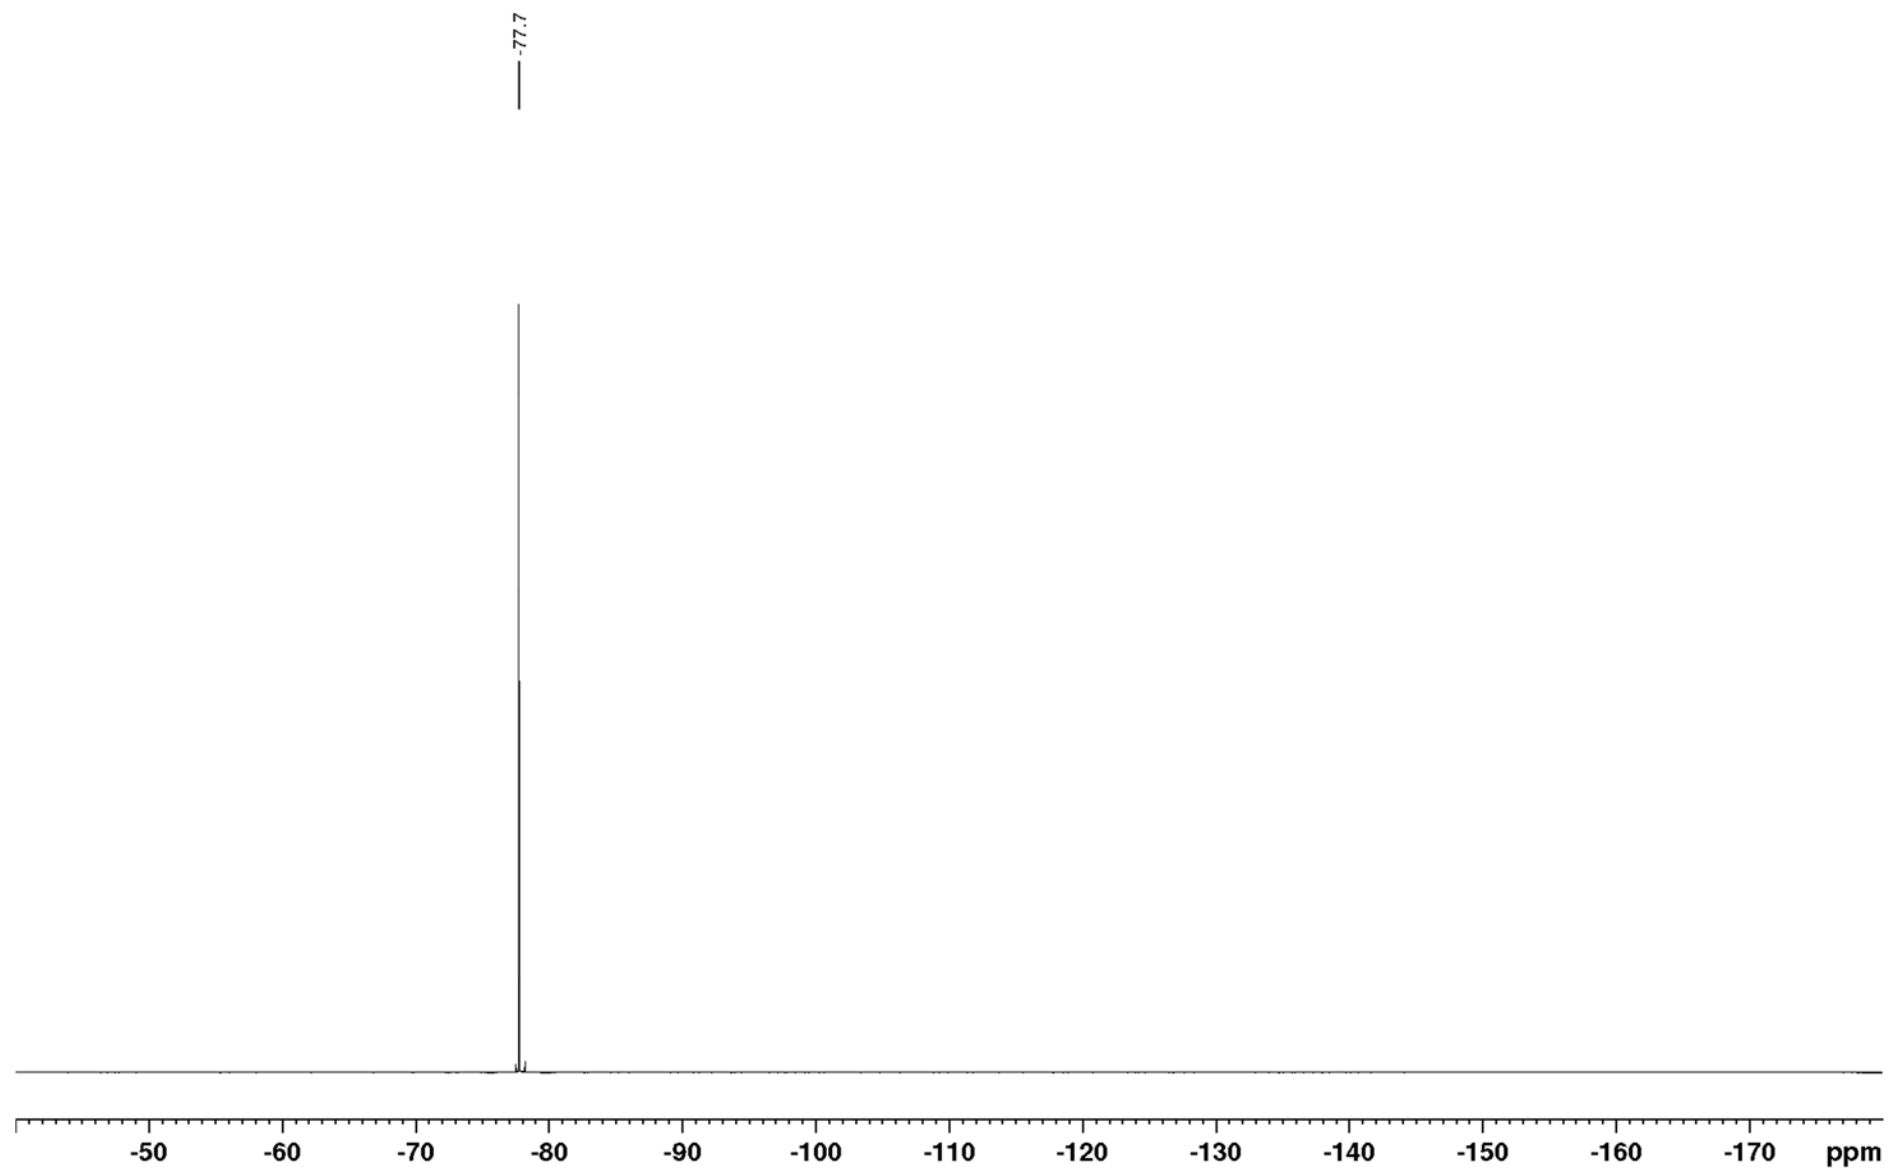

## SUPPORTING INFORMATION

([1,1'-Biphenyl]-4-yl)-*N,N,N*-trimethylethan-1-aminium trifluoromethanesulfonate (1e)<sup>1</sup>H NMR (400 MHz,7.81  
7.79  
7.73  
7.72  
7.69  
7.67  
7.52  
7.50  
7.48  
7.43  
7.41  
7.394.84  
4.82  
4.81  
4.79

3.01

1.76  
1.74DMSO-*d*<sub>6</sub>):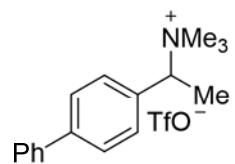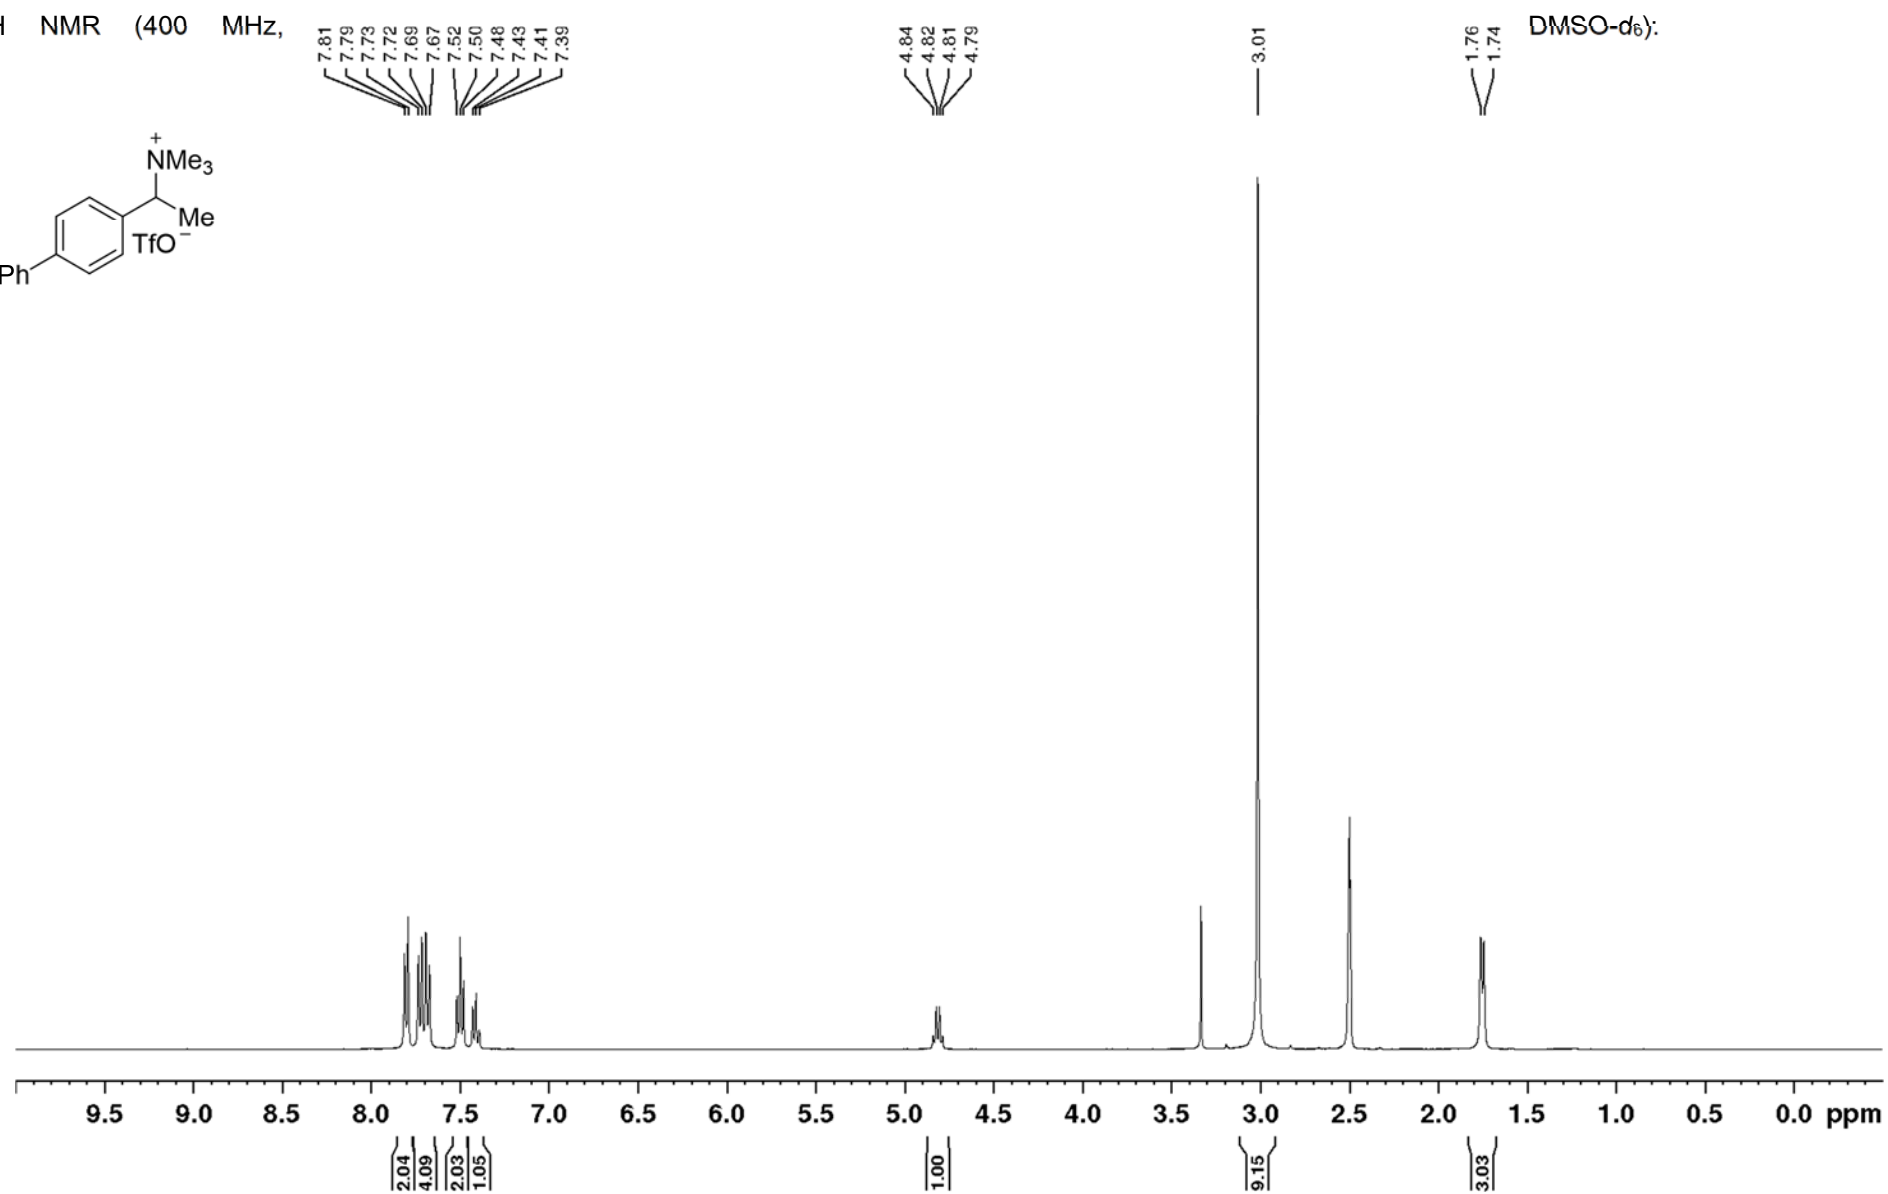

## SUPPORTING INFORMATION

 $^{13}\text{C}\{^1\text{H}\}$  NMR (101 MHz,  $\text{DMSO-}d_6$ ):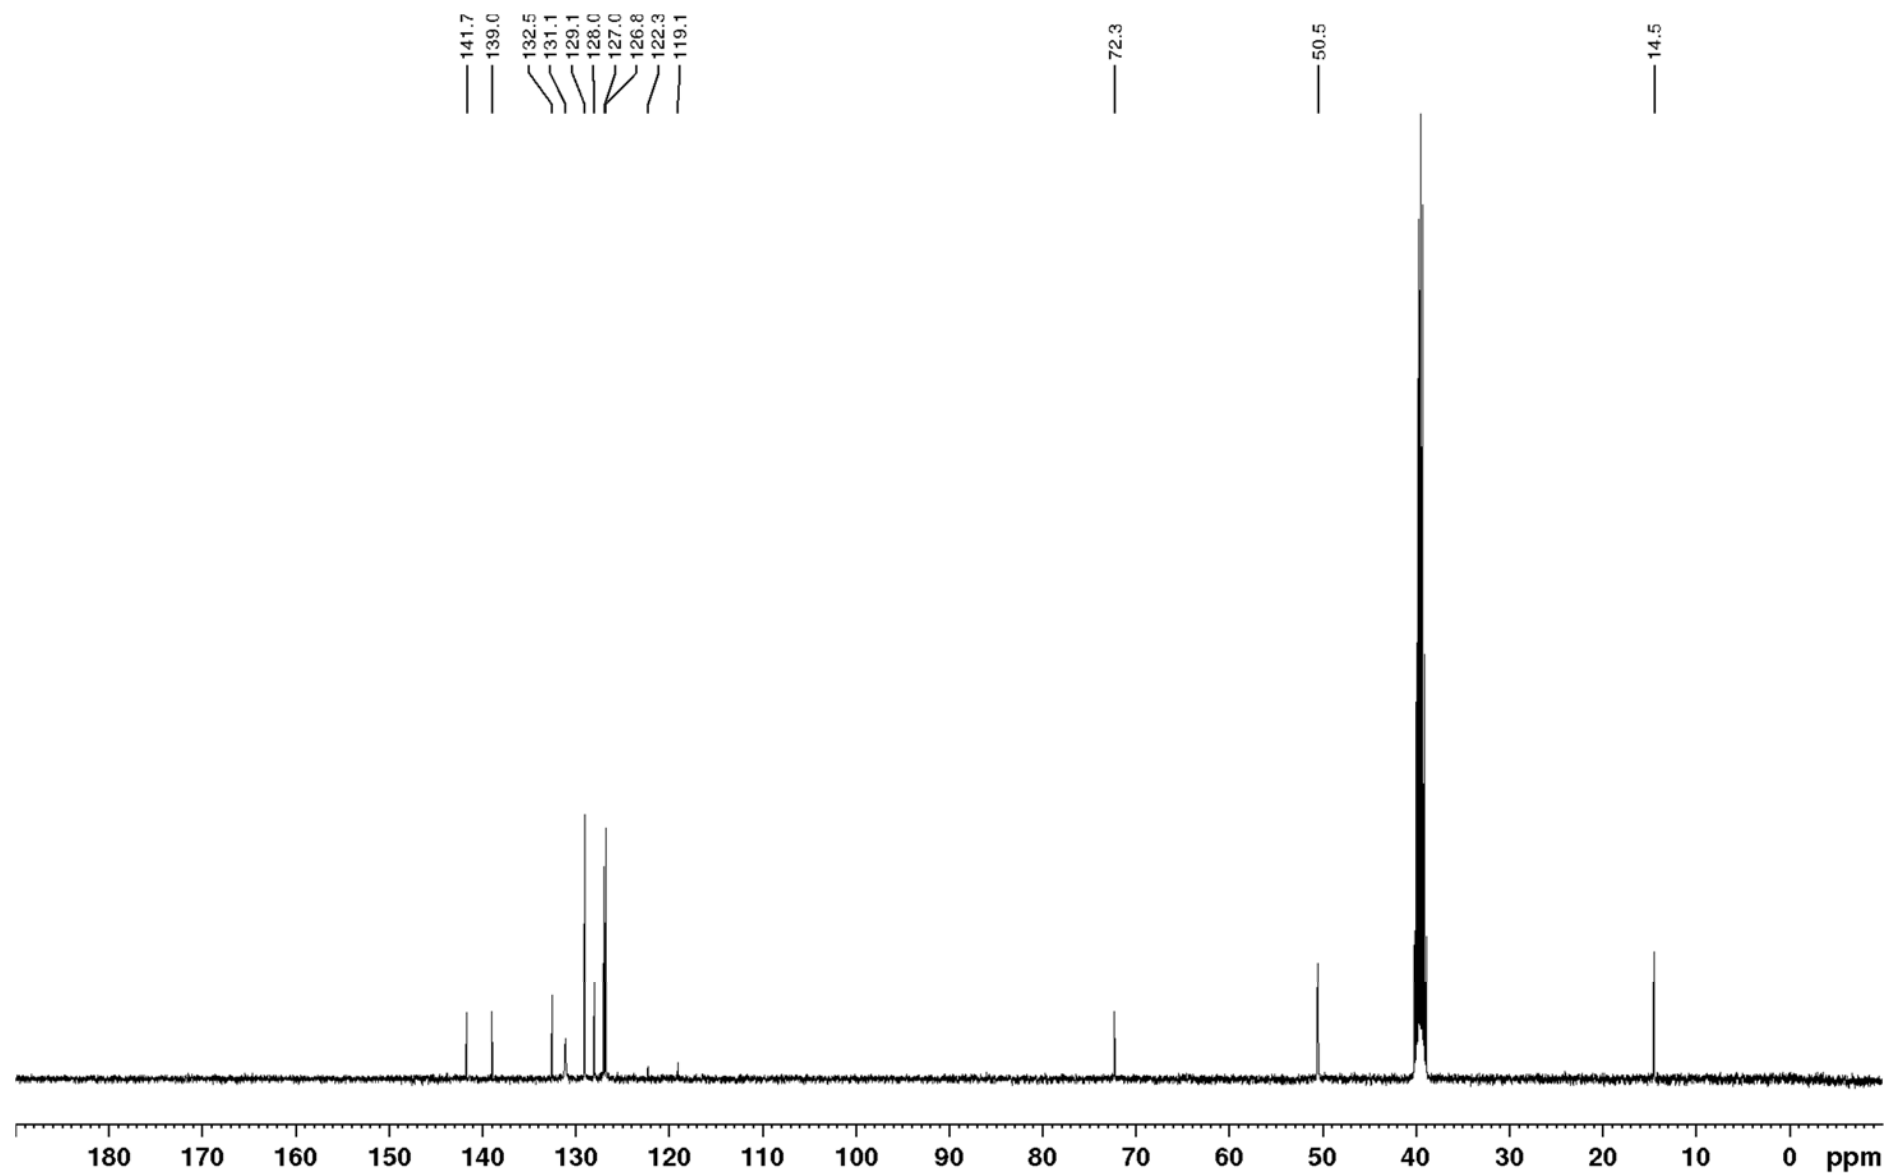

## SUPPORTING INFORMATION

 $^{13}\text{C}\{^{19}\text{F}\}$  DEPT NMR (126 MHz,  $\text{DMSO-}d_6$ ):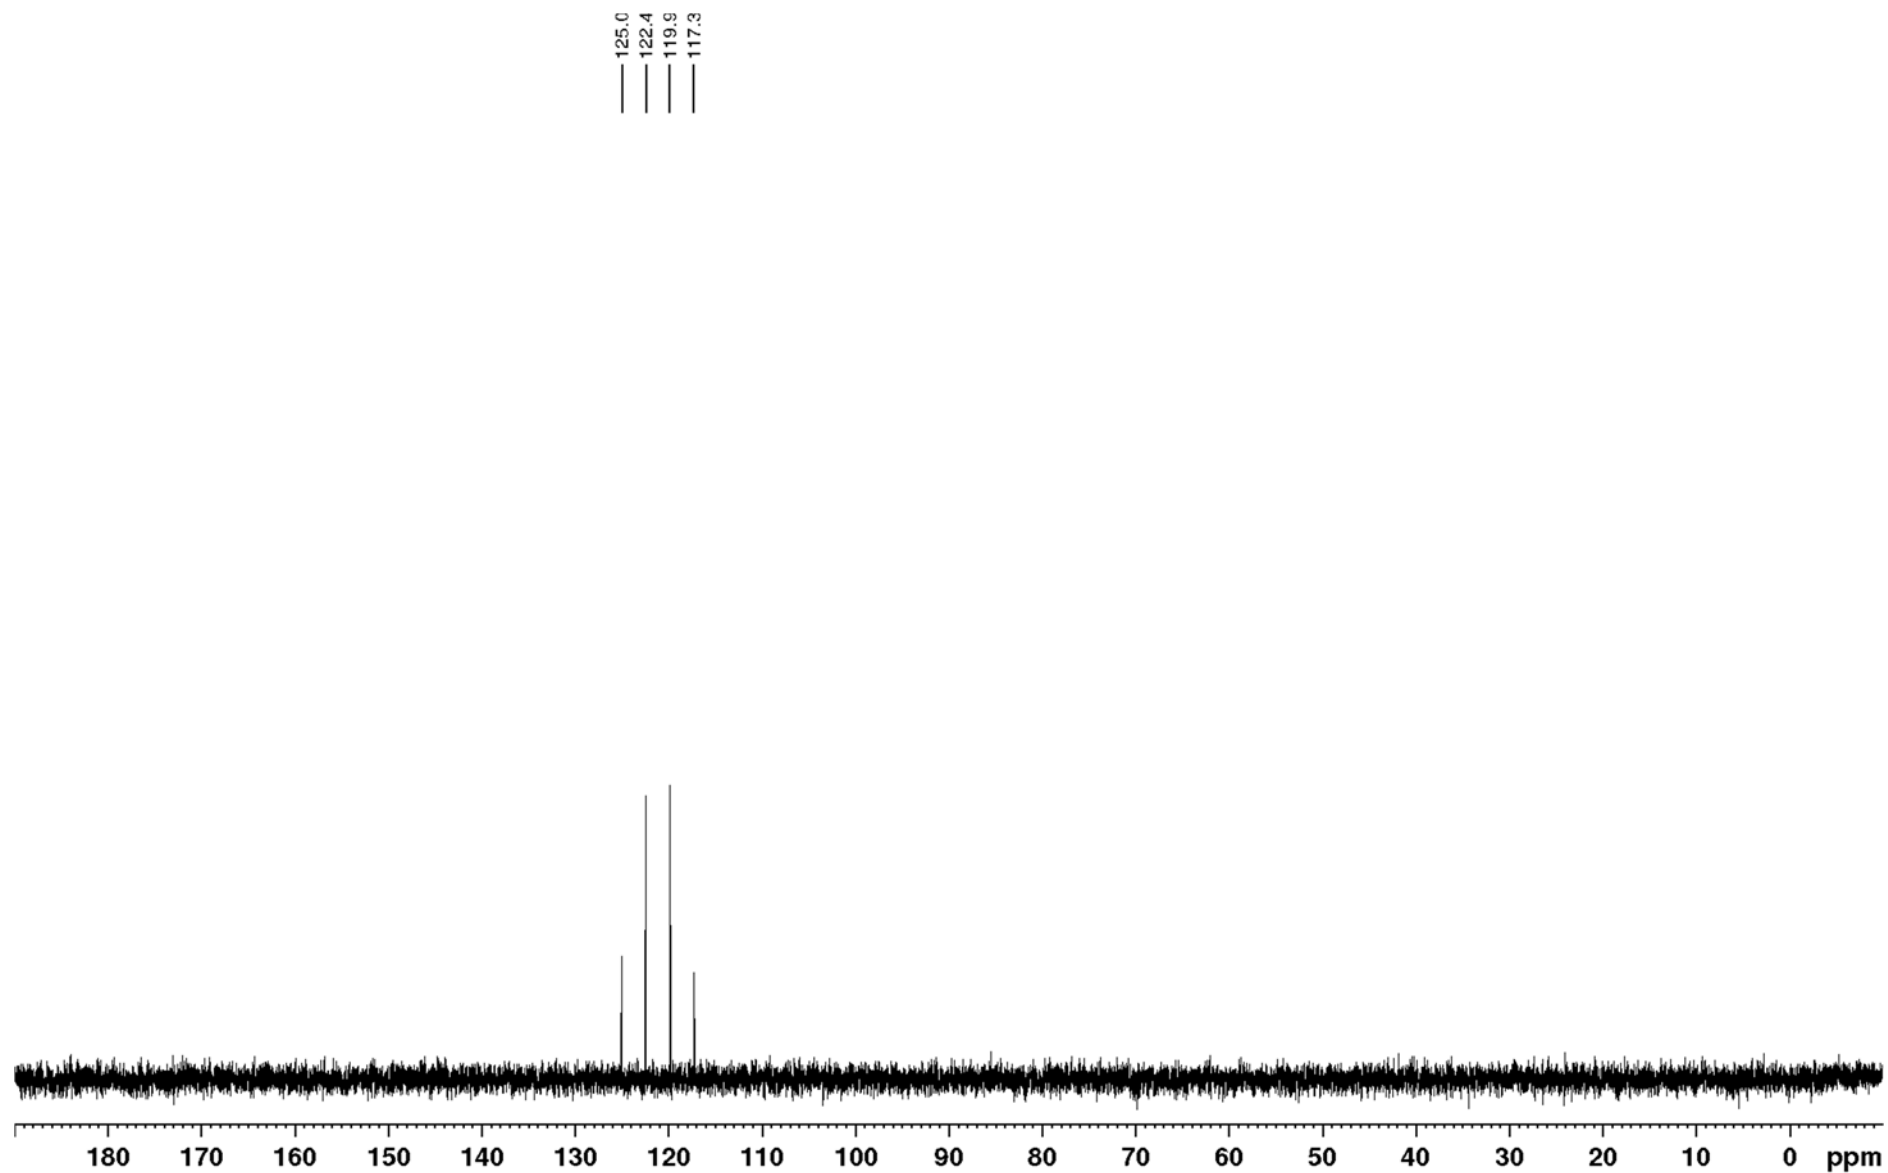

## SUPPORTING INFORMATION

 $^{19}\text{F}\{^1\text{H}\}$  NMR (471 MHz,  $\text{DMSO-}d_6$ ):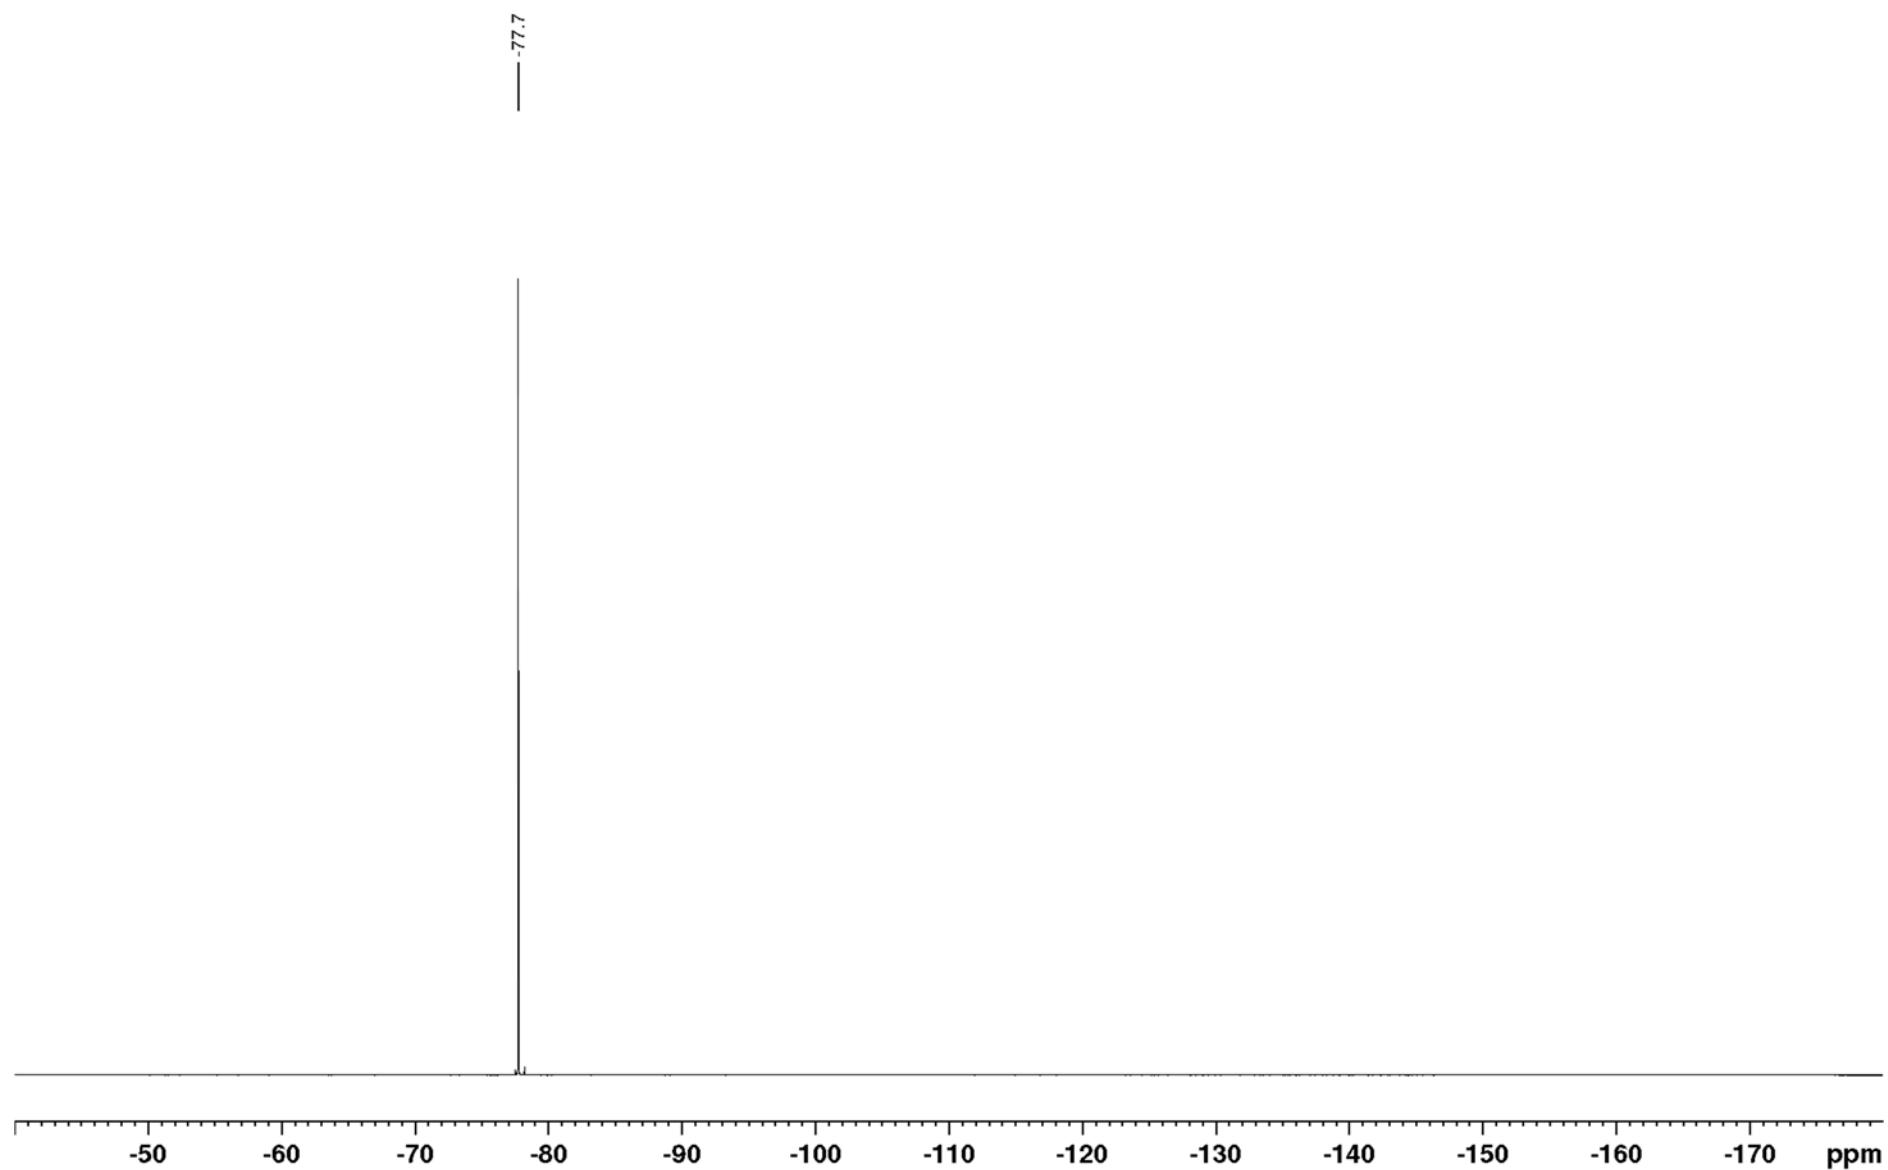

## SUPPORTING INFORMATION

**1-(4-Methoxyphenyl)-*N,N,N*-trimethylethan-1-aminium trifluoromethanesulfonate (1f)**<sup>1</sup>H NMR (500 MHz, DMSO-*d*<sub>6</sub>):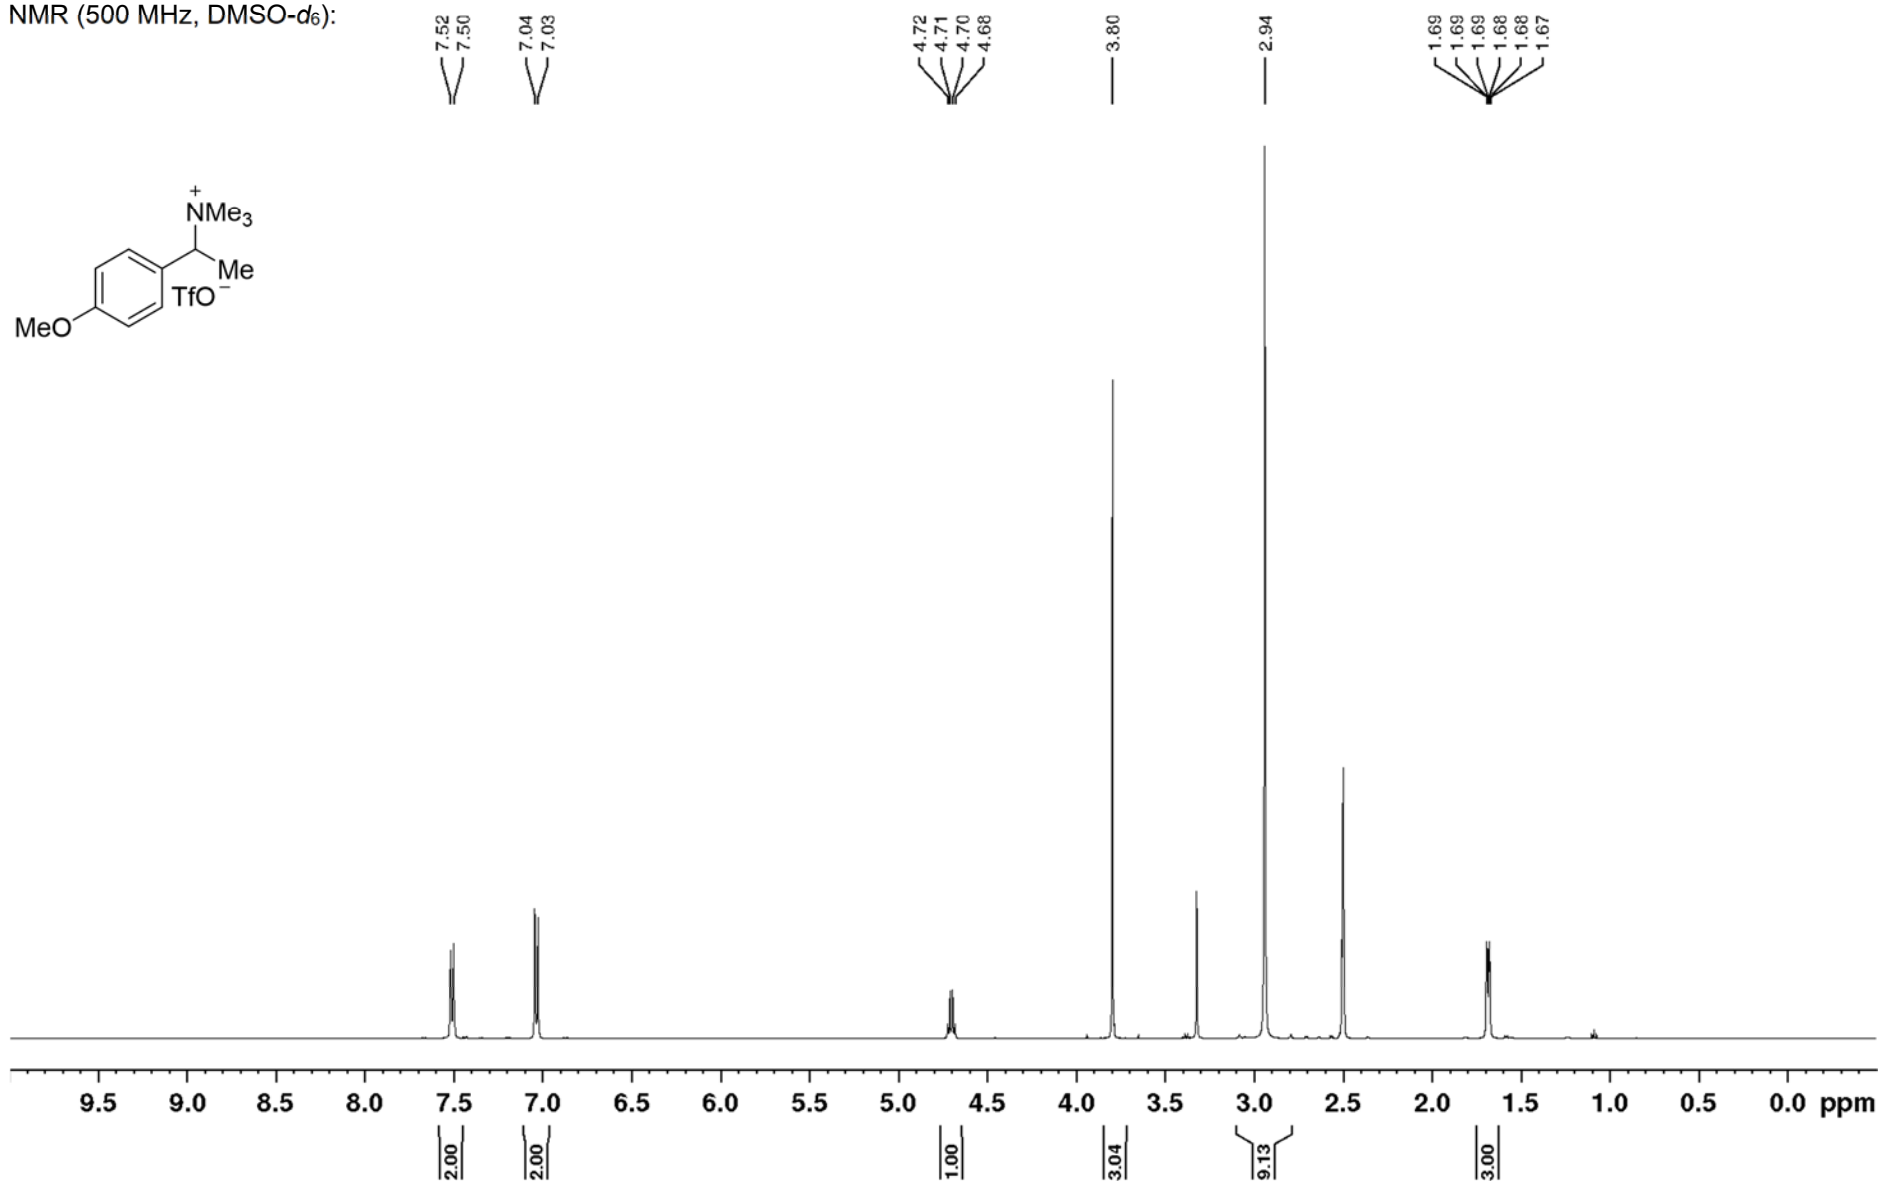

## SUPPORTING INFORMATION

 $^{13}\text{C}\{^1\text{H}\}$  NMR (126 MHz,  $\text{DMSO-}d_6$ ):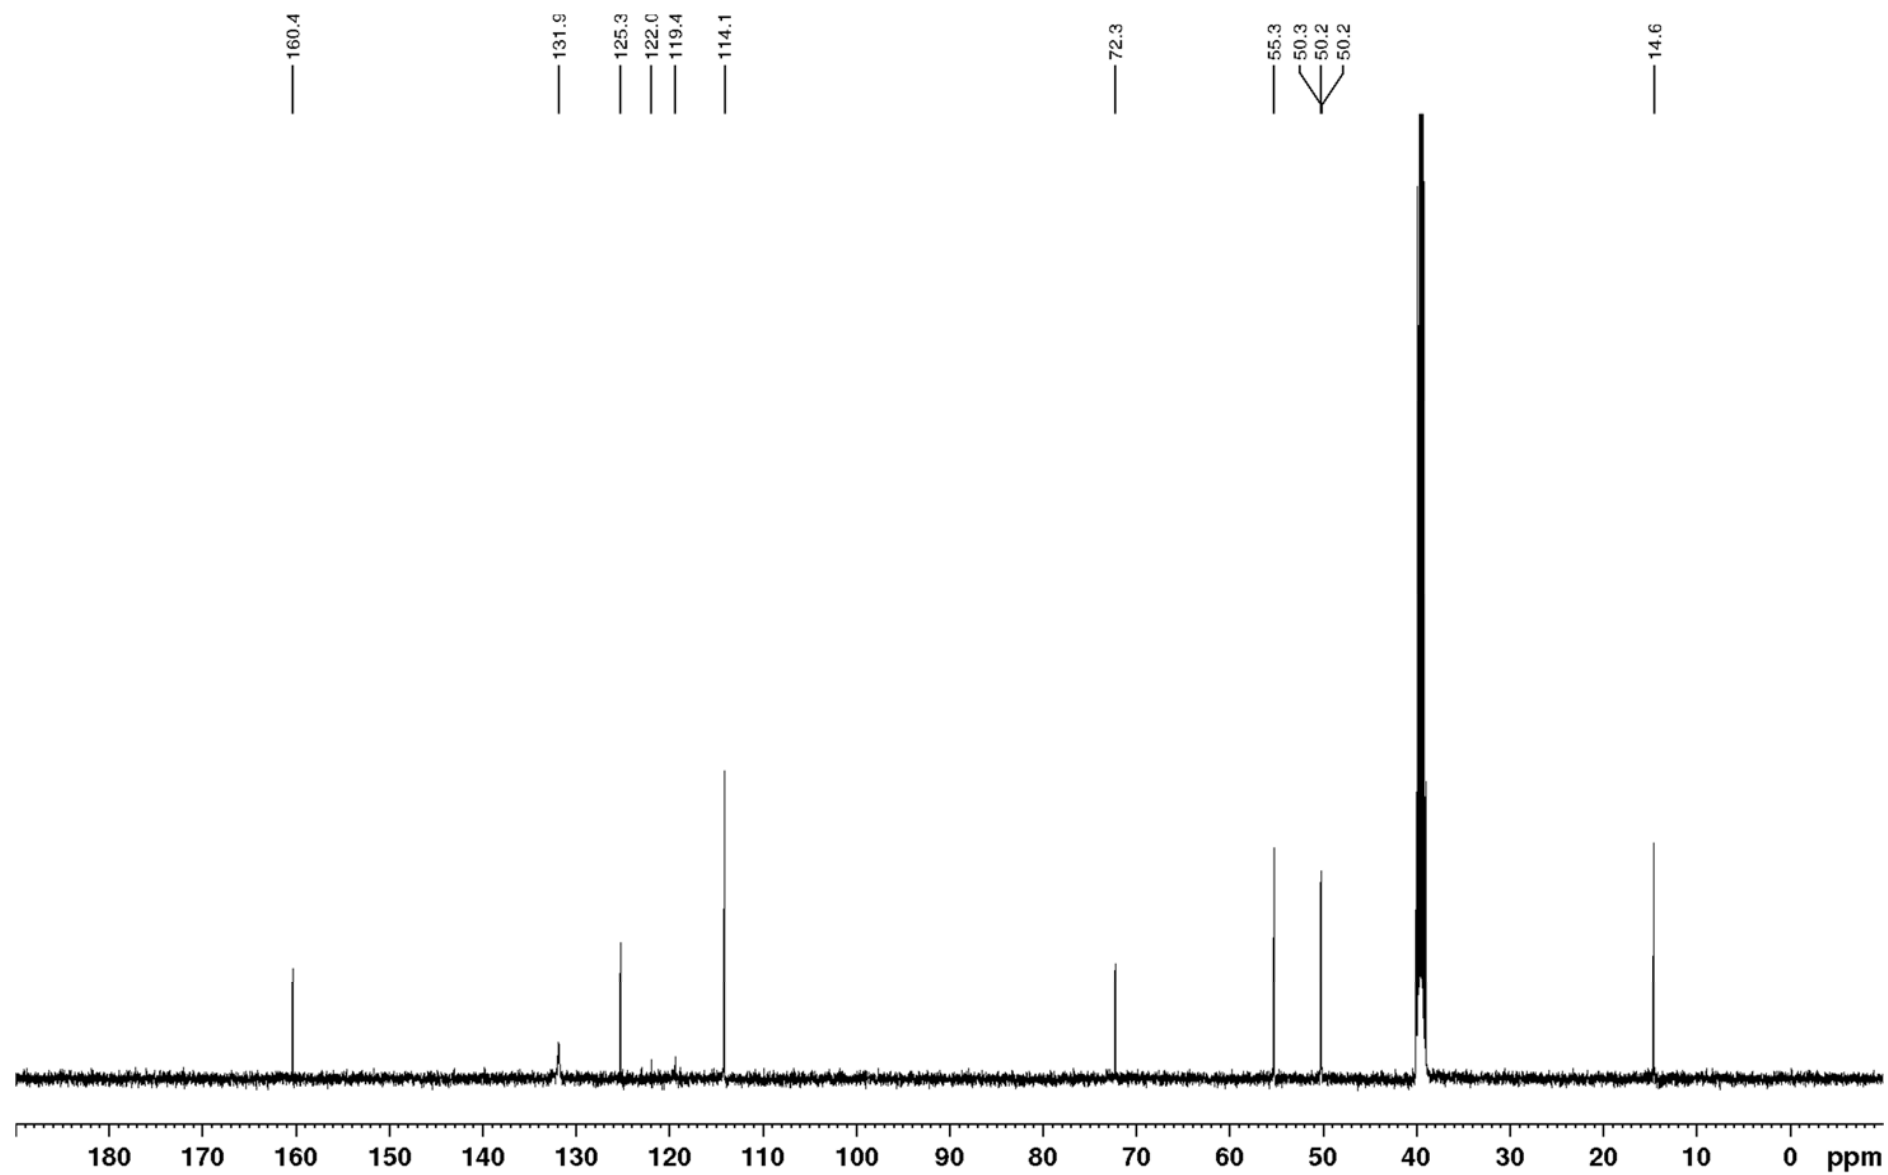



## SUPPORTING INFORMATION

 $^{13}\text{C}\{^{19}\text{F}\}$  DEPT NMR (126 MHz,  $\text{DMSO-}d_6$ ):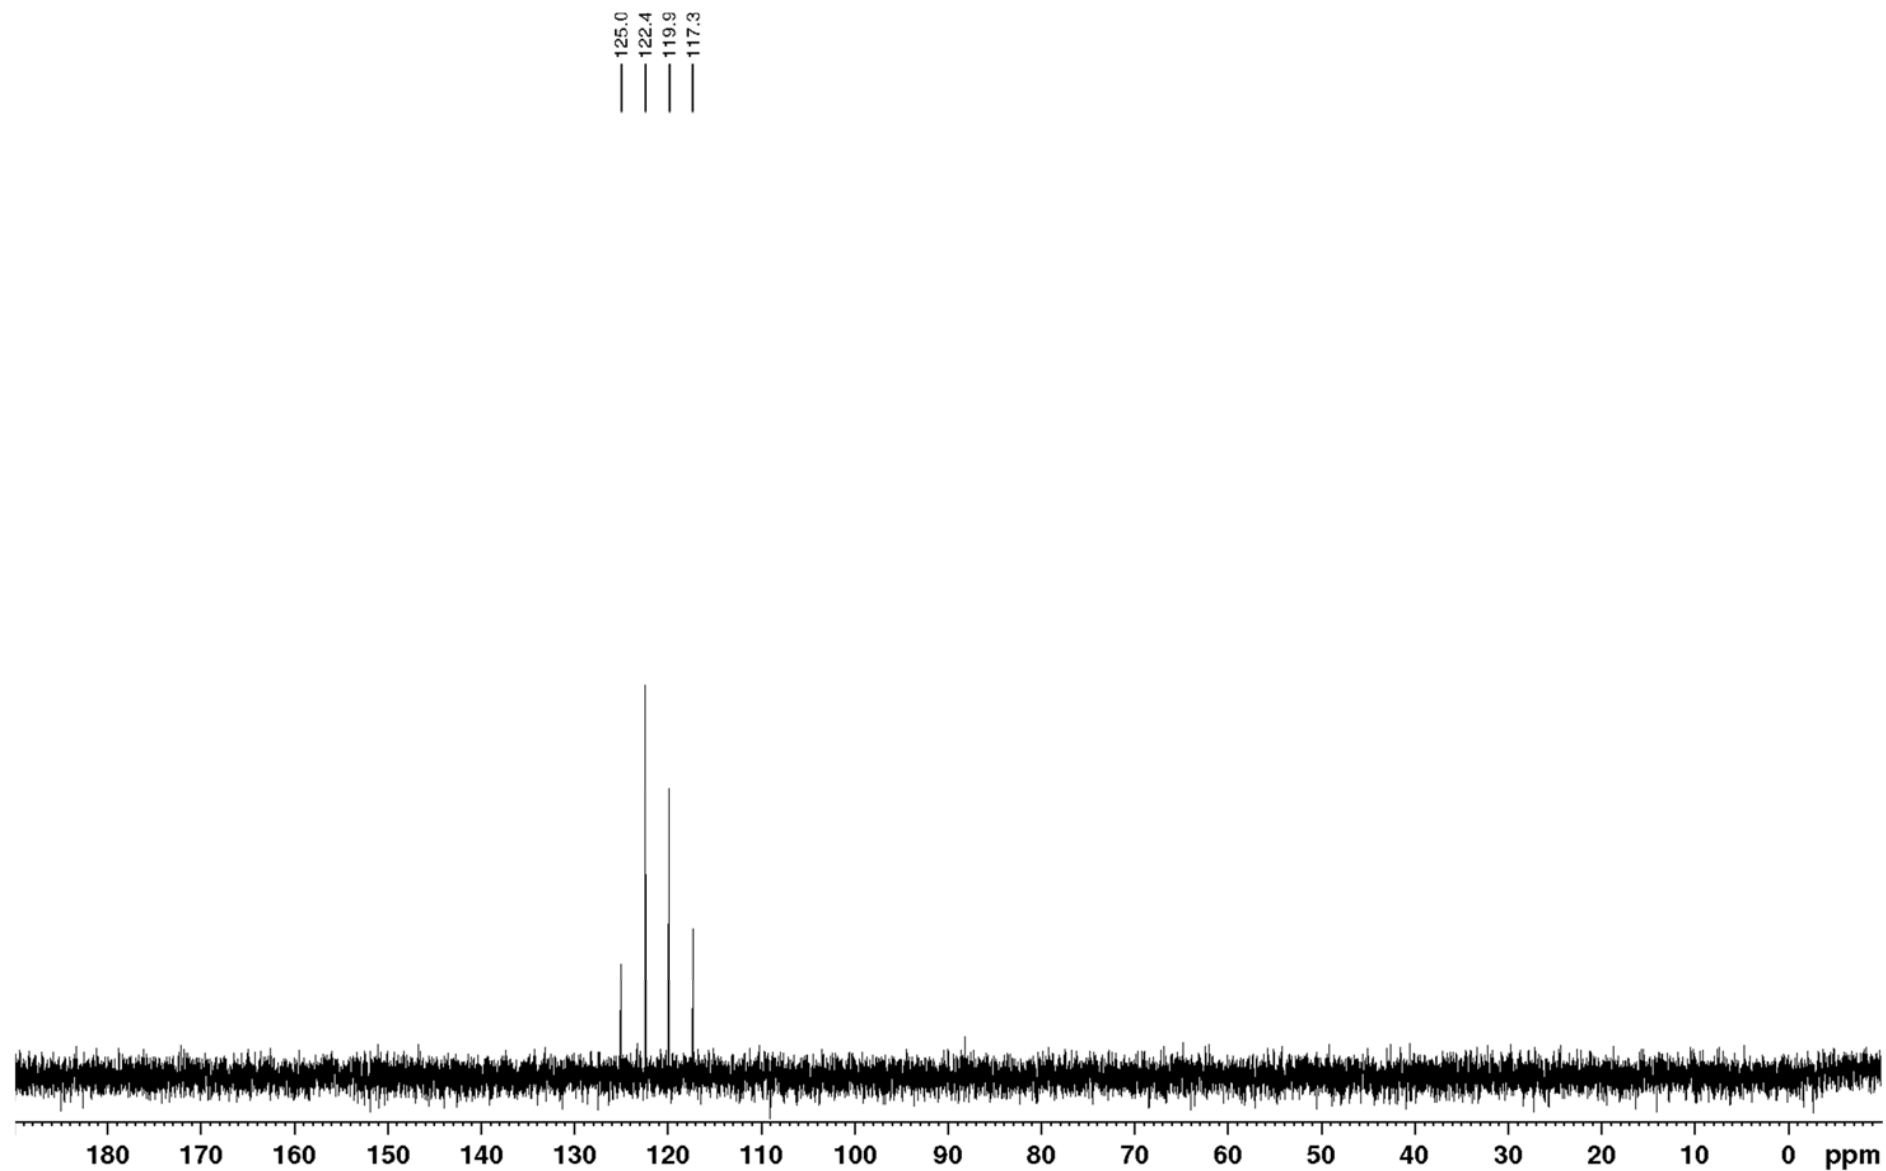

## SUPPORTING INFORMATION

 $^{19}\text{F}\{^1\text{H}\}$  NMR (471 MHz,  $\text{DMSO-}d_6$ ):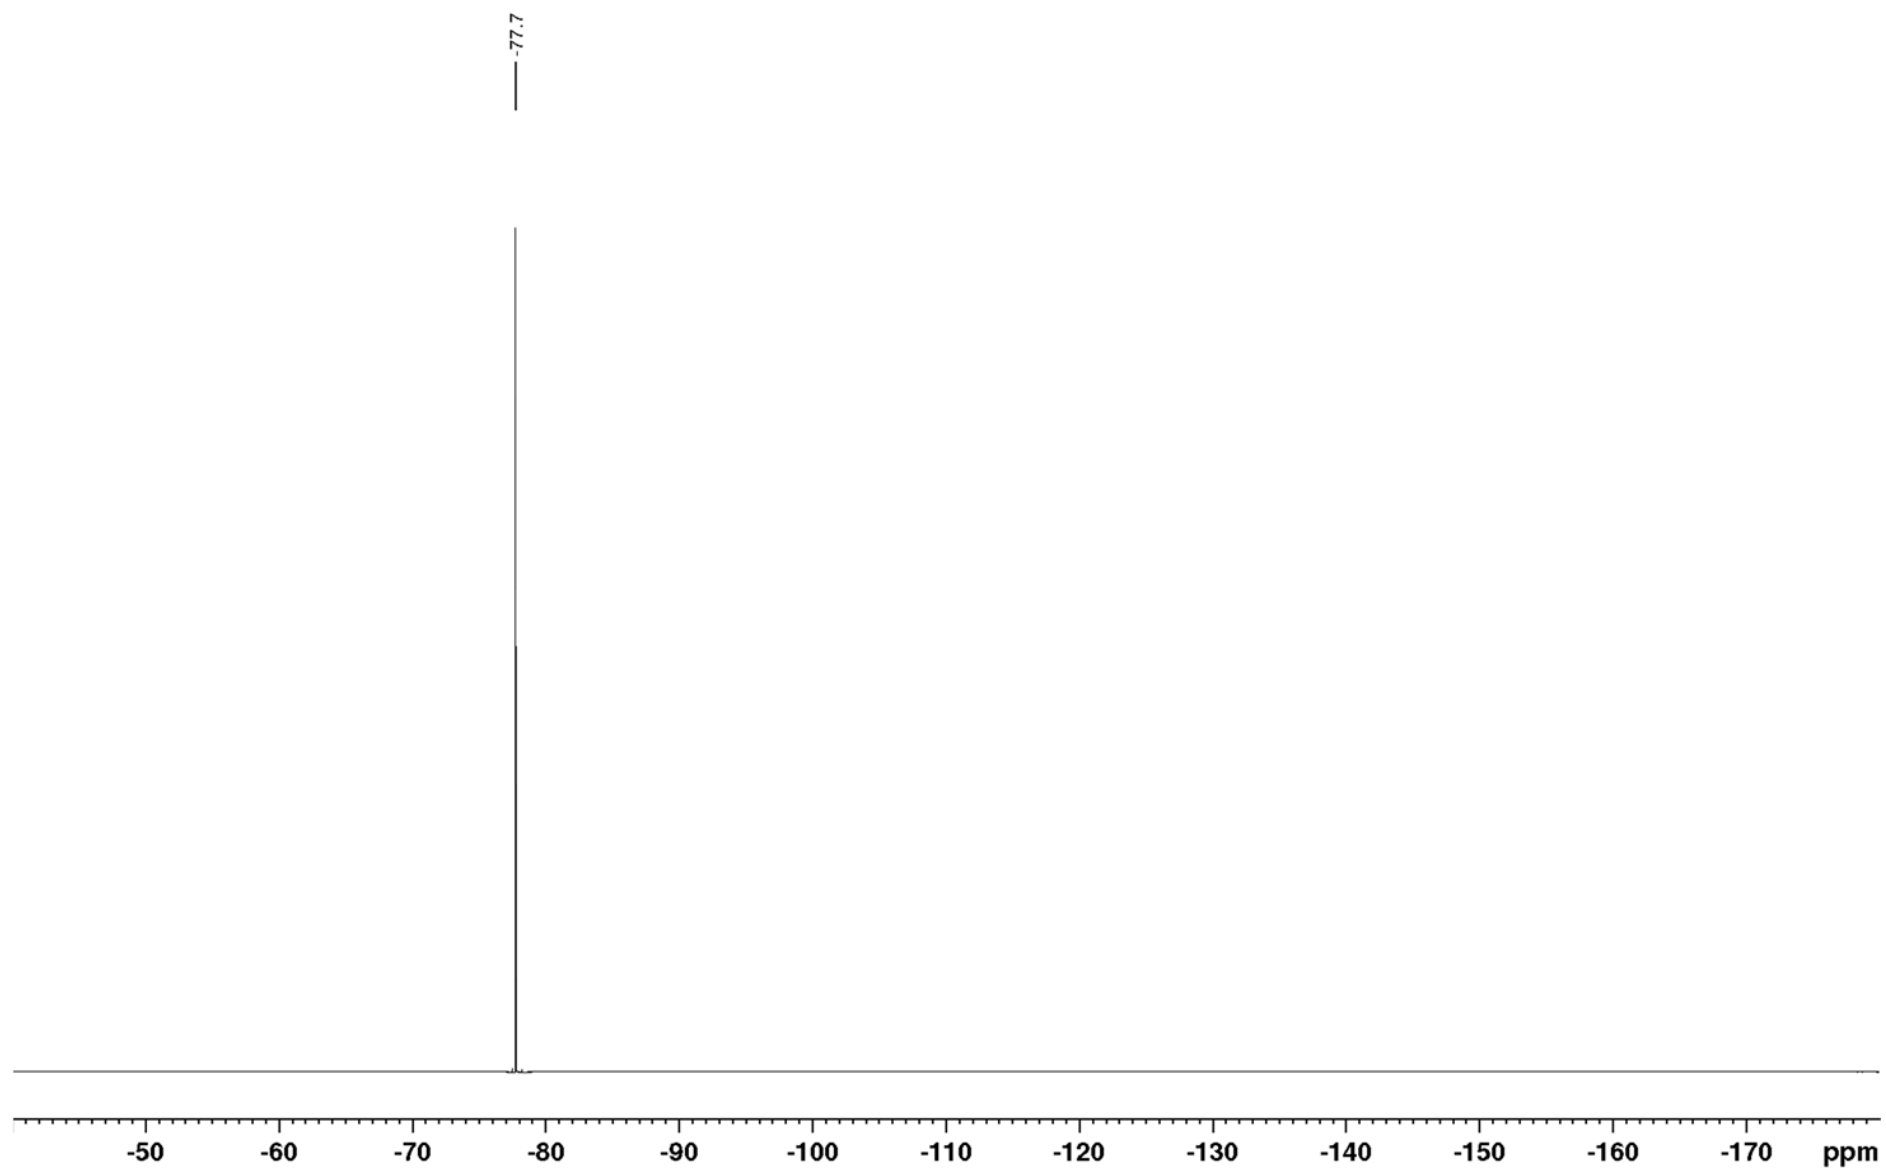

## SUPPORTING INFORMATION

**1-(4-Fluorophenyl)-*N,N,N*-trimethylethan-1-aminium trifluoromethanesulfonate (1g)**<sup>1</sup>H NMR (500 MHz, DMSO-*d*<sub>6</sub>):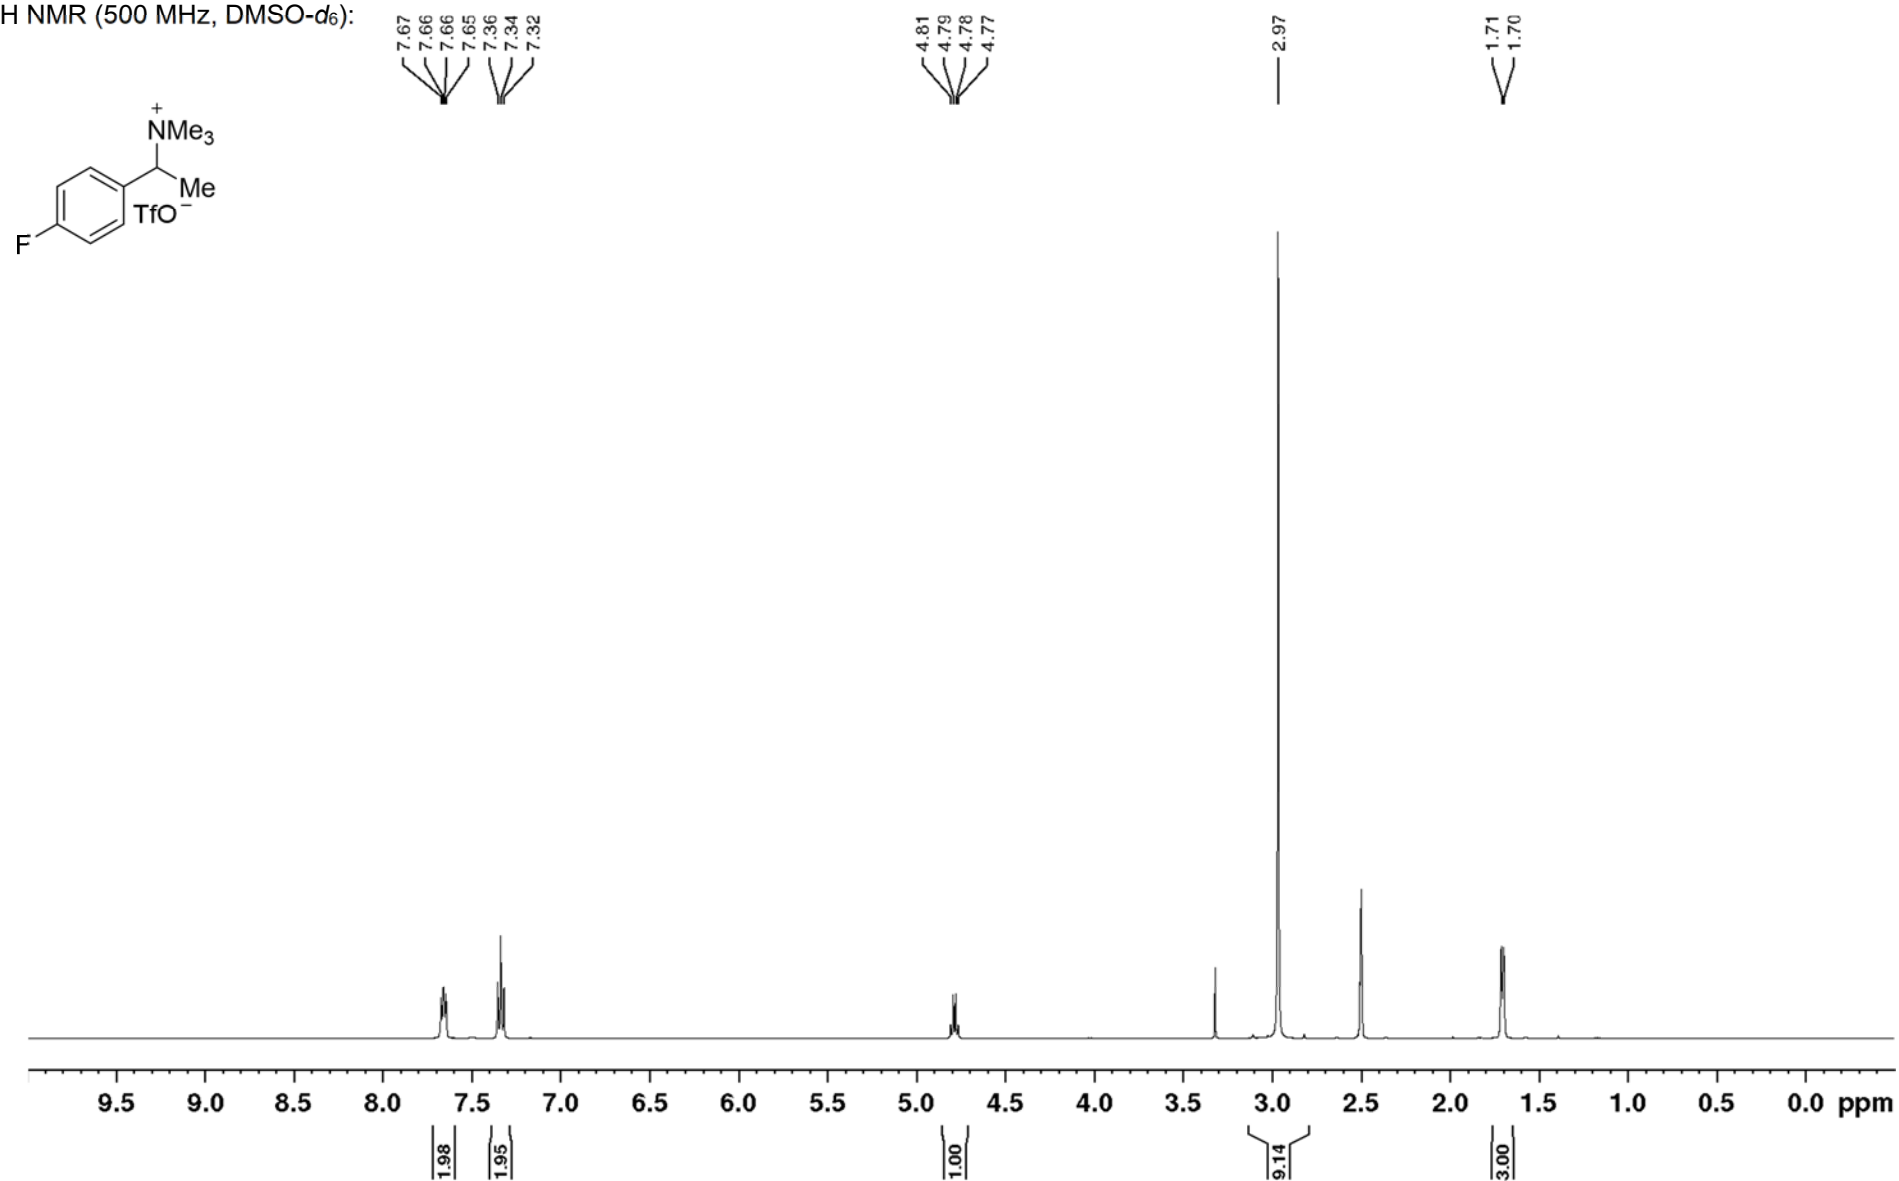

## SUPPORTING INFORMATION

 $^{13}\text{C}\{^1\text{H}\}$  NMR (126 MHz,  $\text{DMSO-}d_6$ ):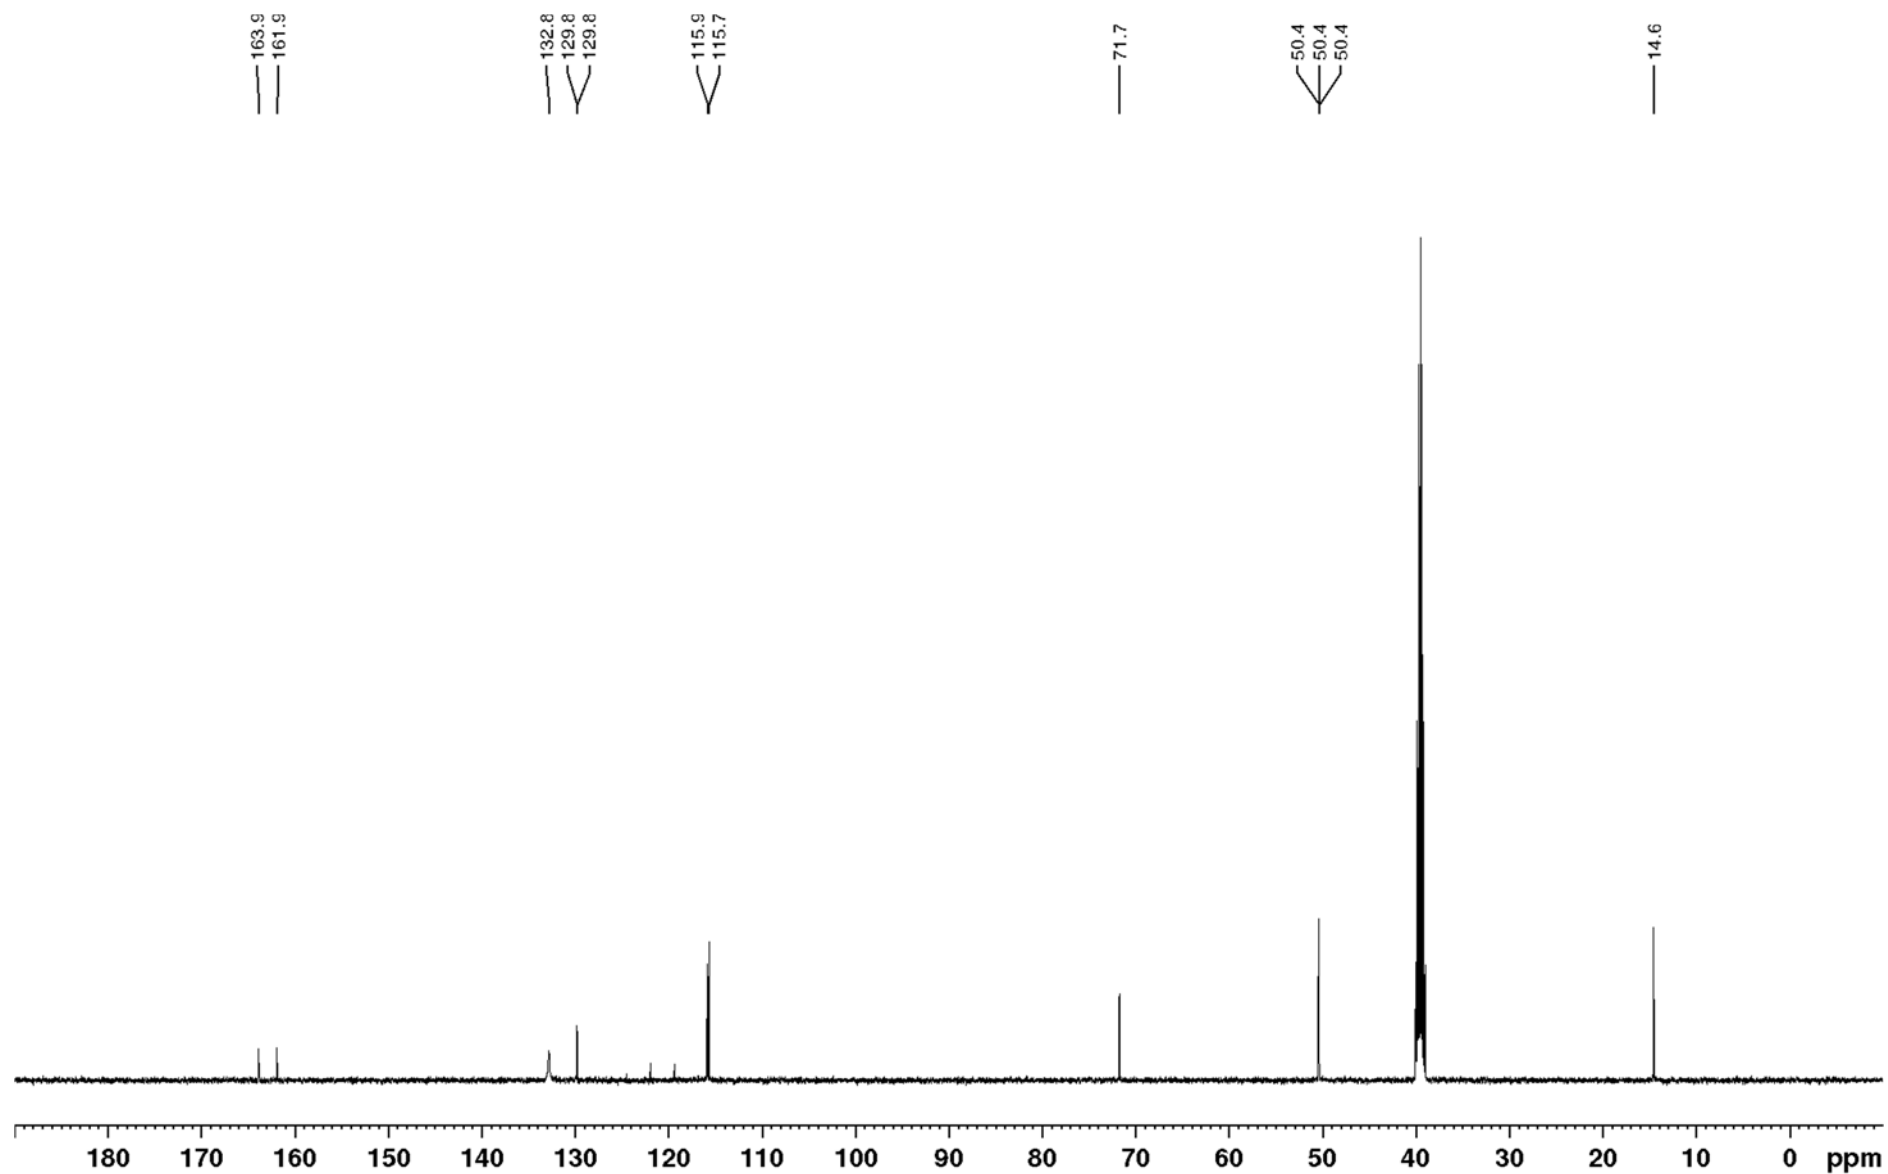

## SUPPORTING INFORMATION

 $^{13}\text{C}\{^{19}\text{F}\}$  DEPT NMR (126 MHz,  $\text{DMSO-}d_6$ ):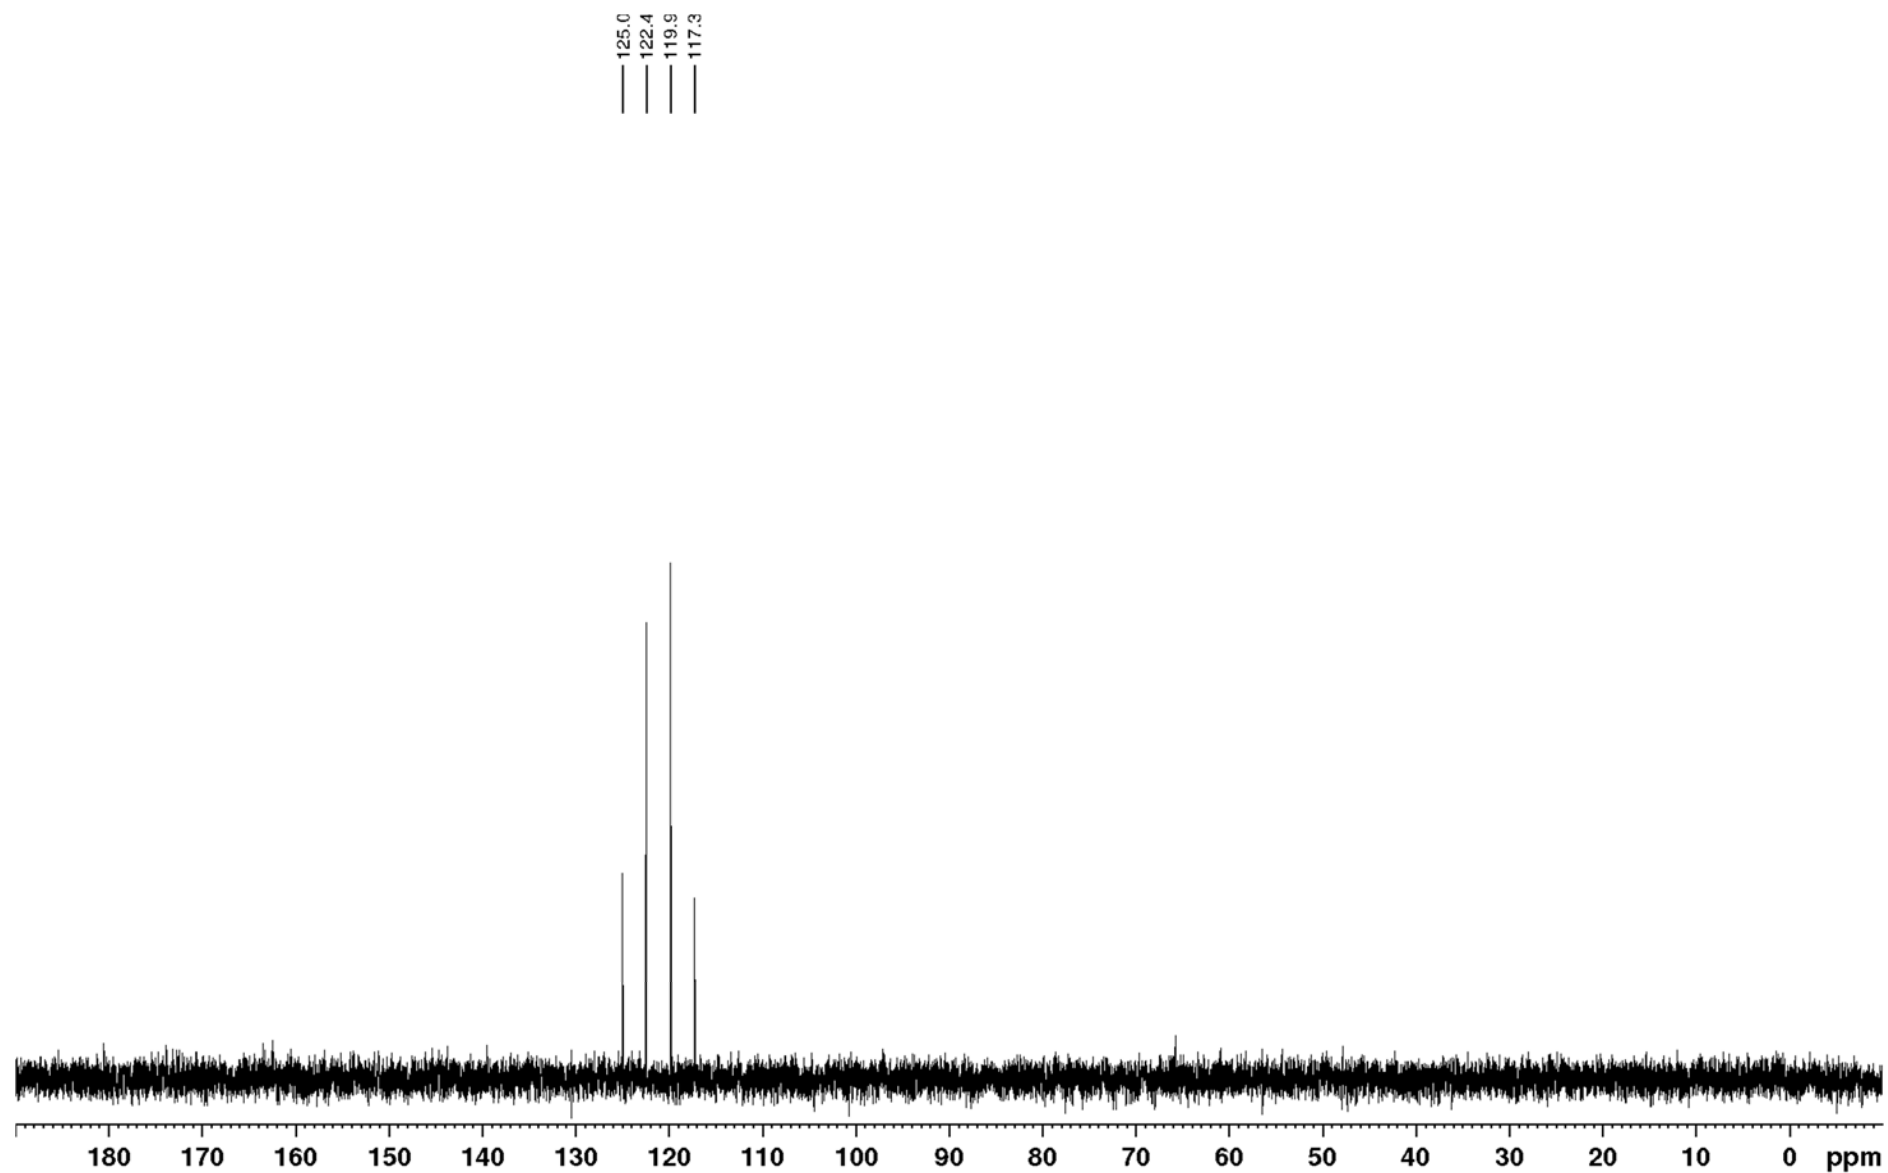

## SUPPORTING INFORMATION

 $^{19}\text{F}\{^1\text{H}\}$  NMR (471 MHz,  $\text{DMSO-}d_6$ ):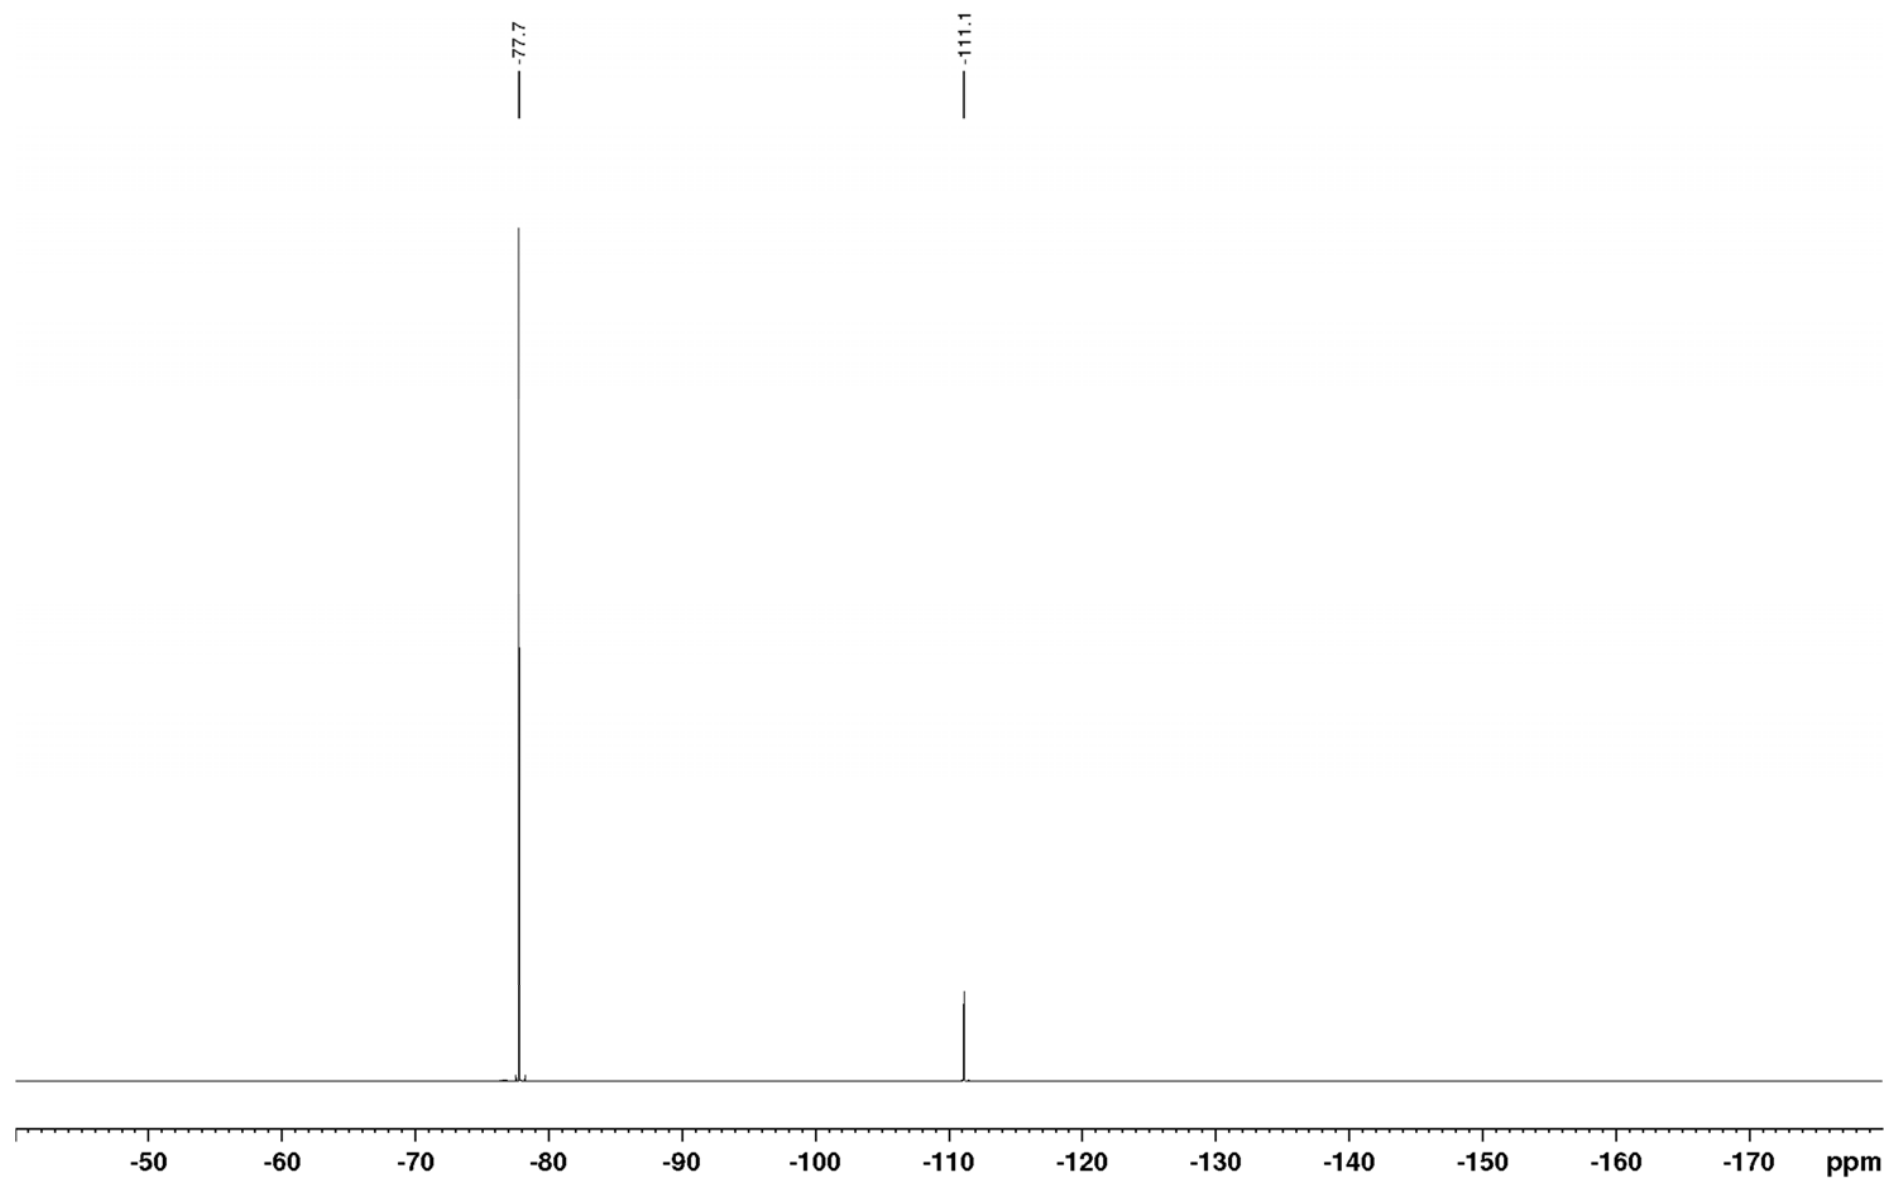

## SUPPORTING INFORMATION

**1-(4-Chlorophenyl)-*N,N,N*-trimethylethan-1-aminium trifluoromethanesulfonate (1h)**<sup>1</sup>H NMR (700 MHz, DMSO-*d*<sub>6</sub>):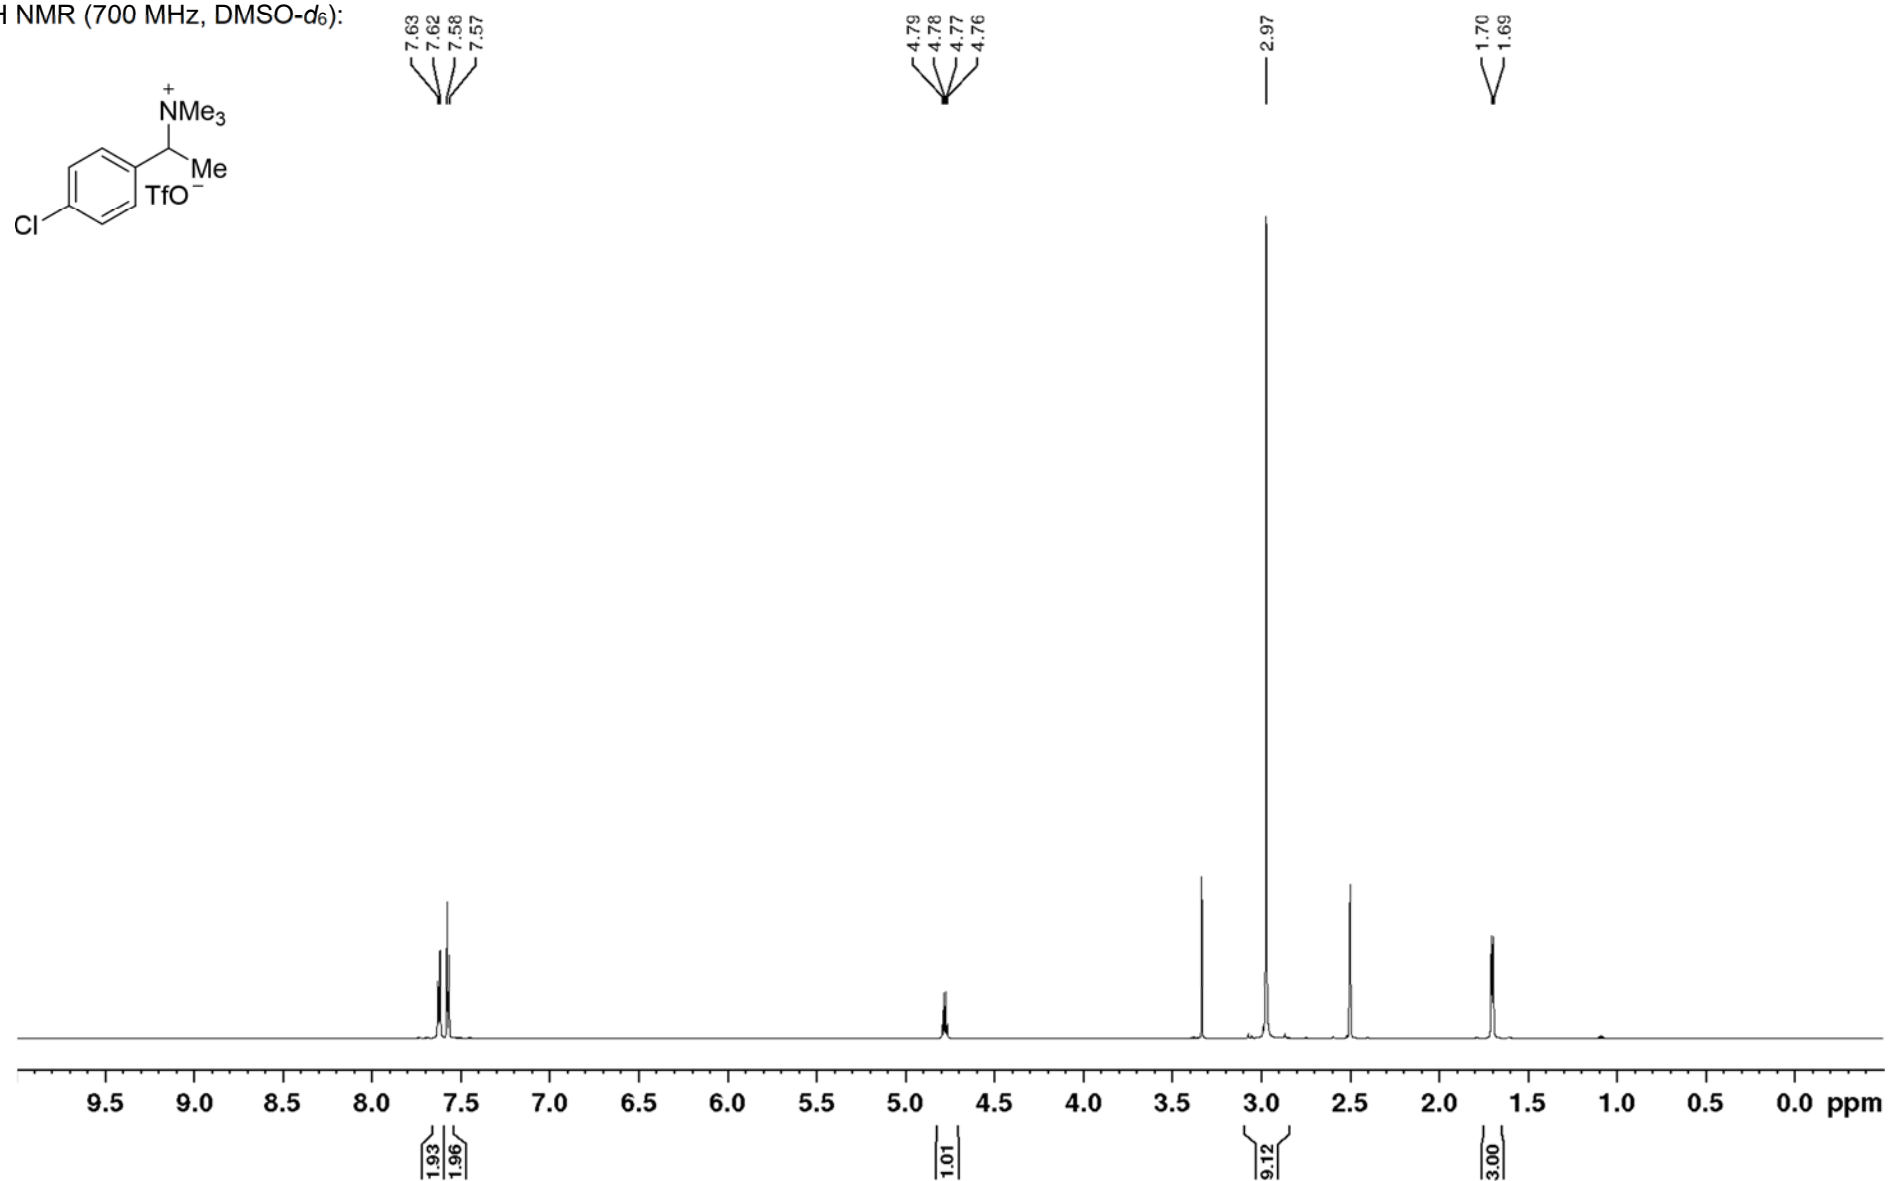

## SUPPORTING INFORMATION

 $^{13}\text{C}\{^1\text{H}\}$  NMR (126 MHz,  $\text{DMSO-}d_6$ ):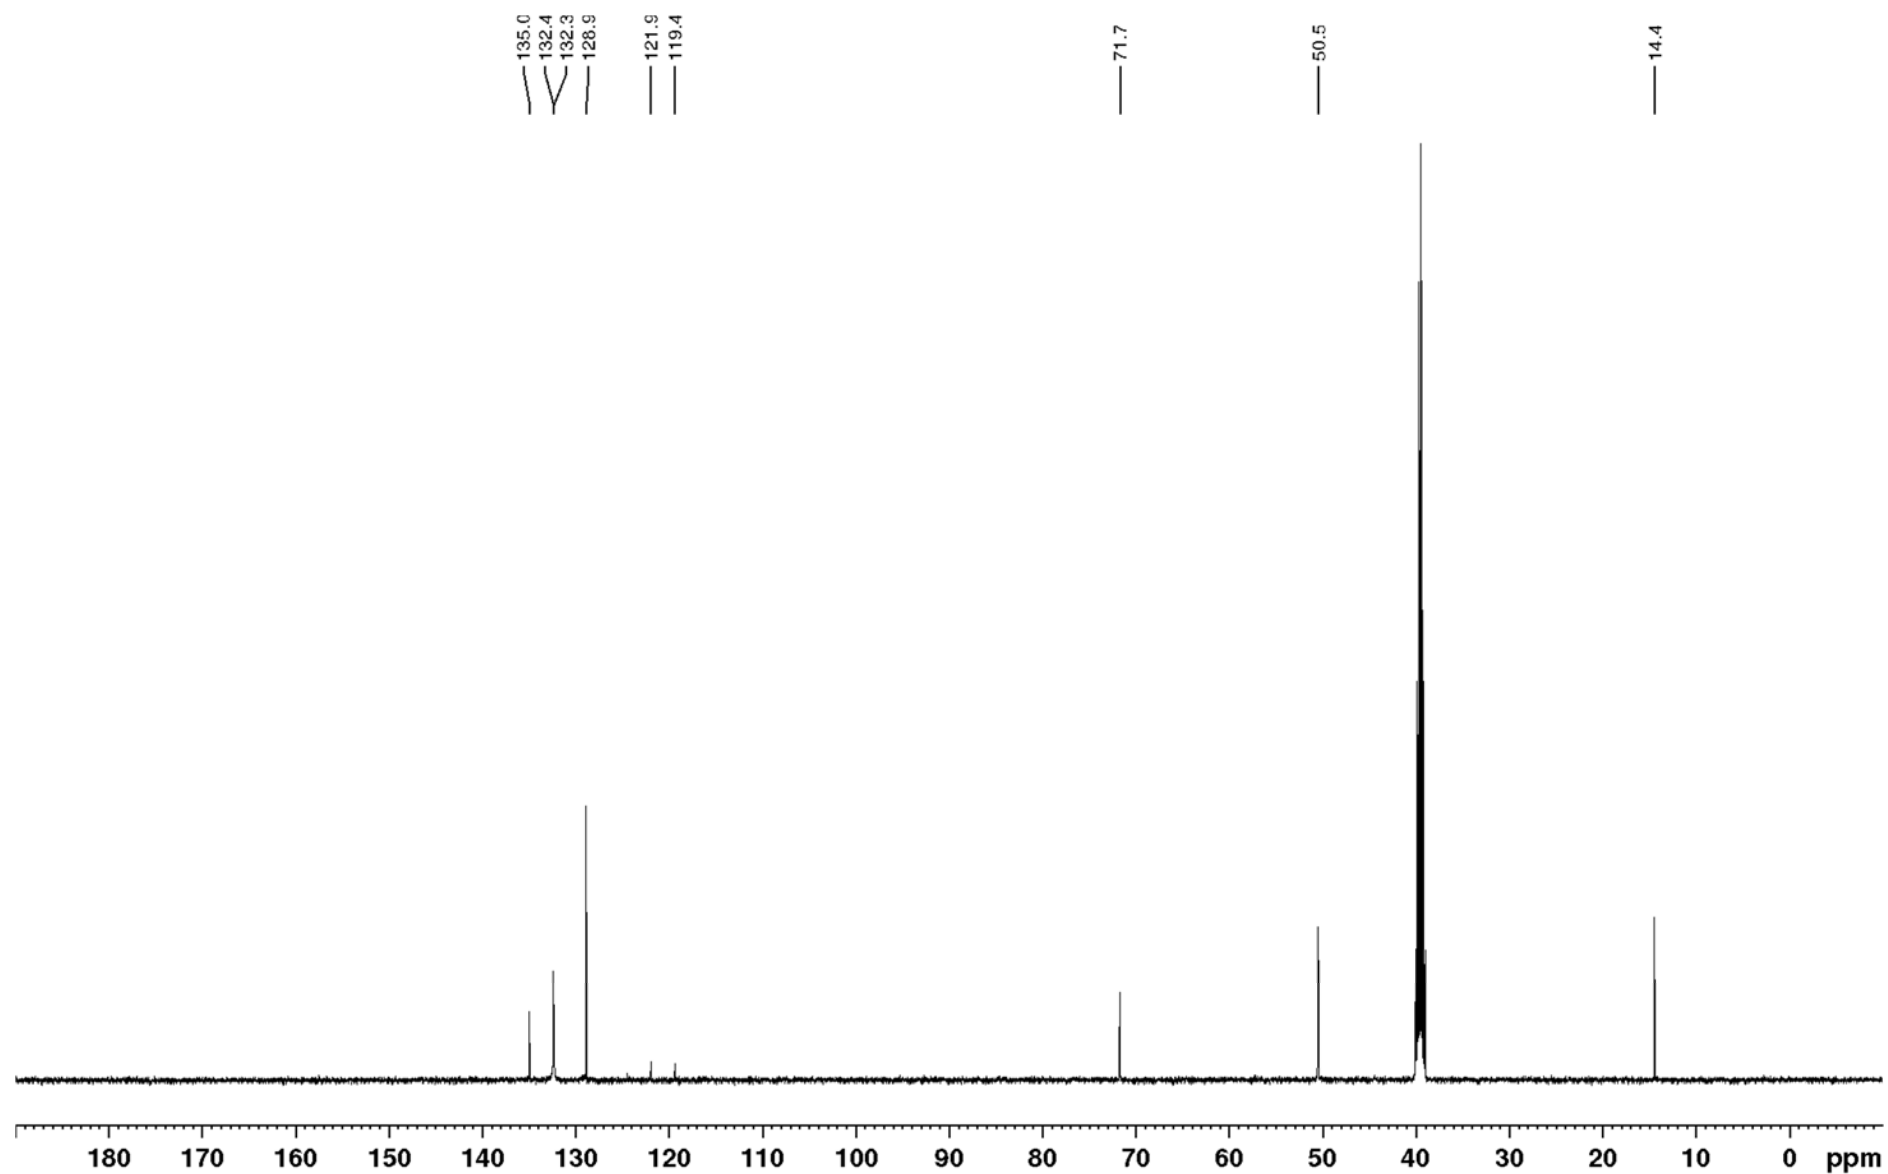



## SUPPORTING INFORMATION

 $^{13}\text{C}\{^{19}\text{F}\}$  DEPT NMR (176 MHz,  $\text{DMSO-}d_6$ ):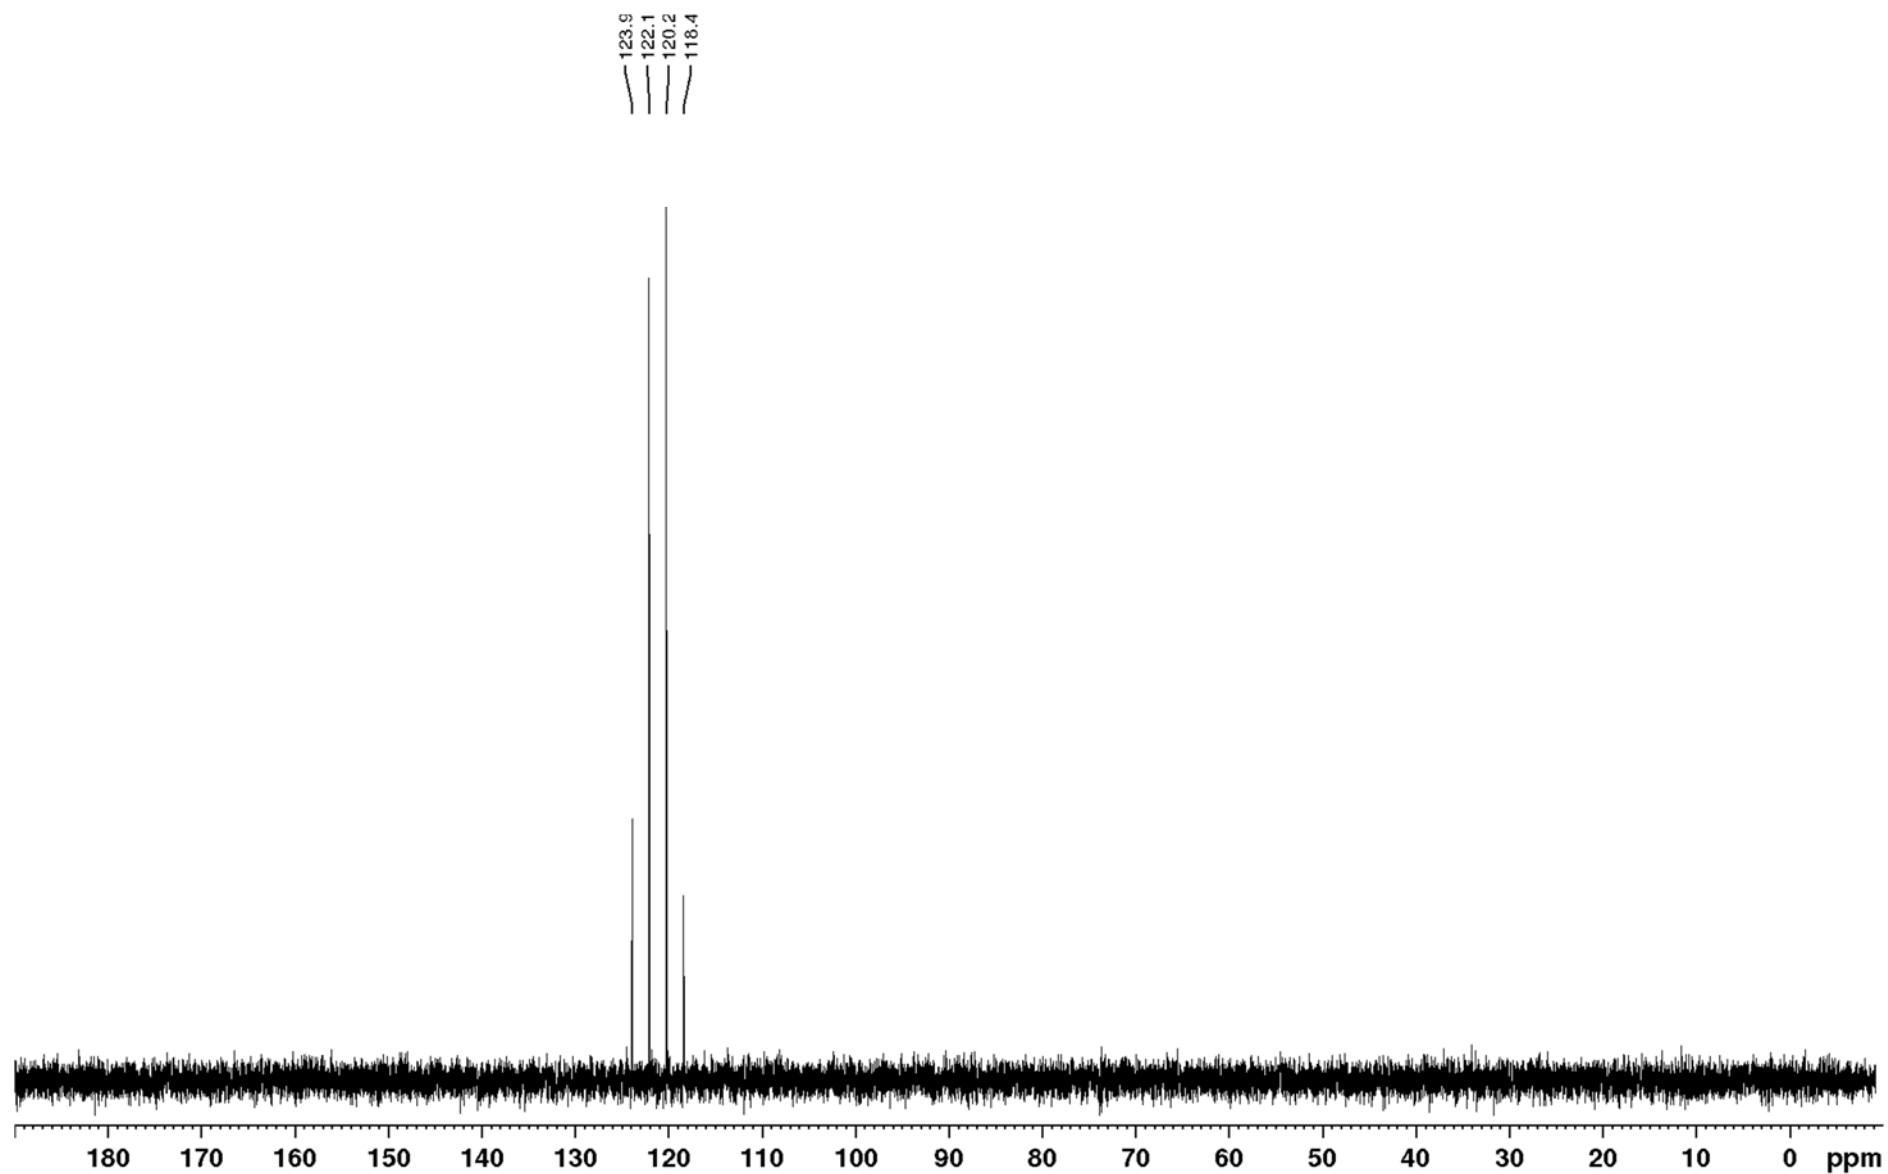

## SUPPORTING INFORMATION

 $^{19}\text{F}\{^1\text{H}\}$  NMR (659 MHz,  $\text{DMSO-}d_6$ ):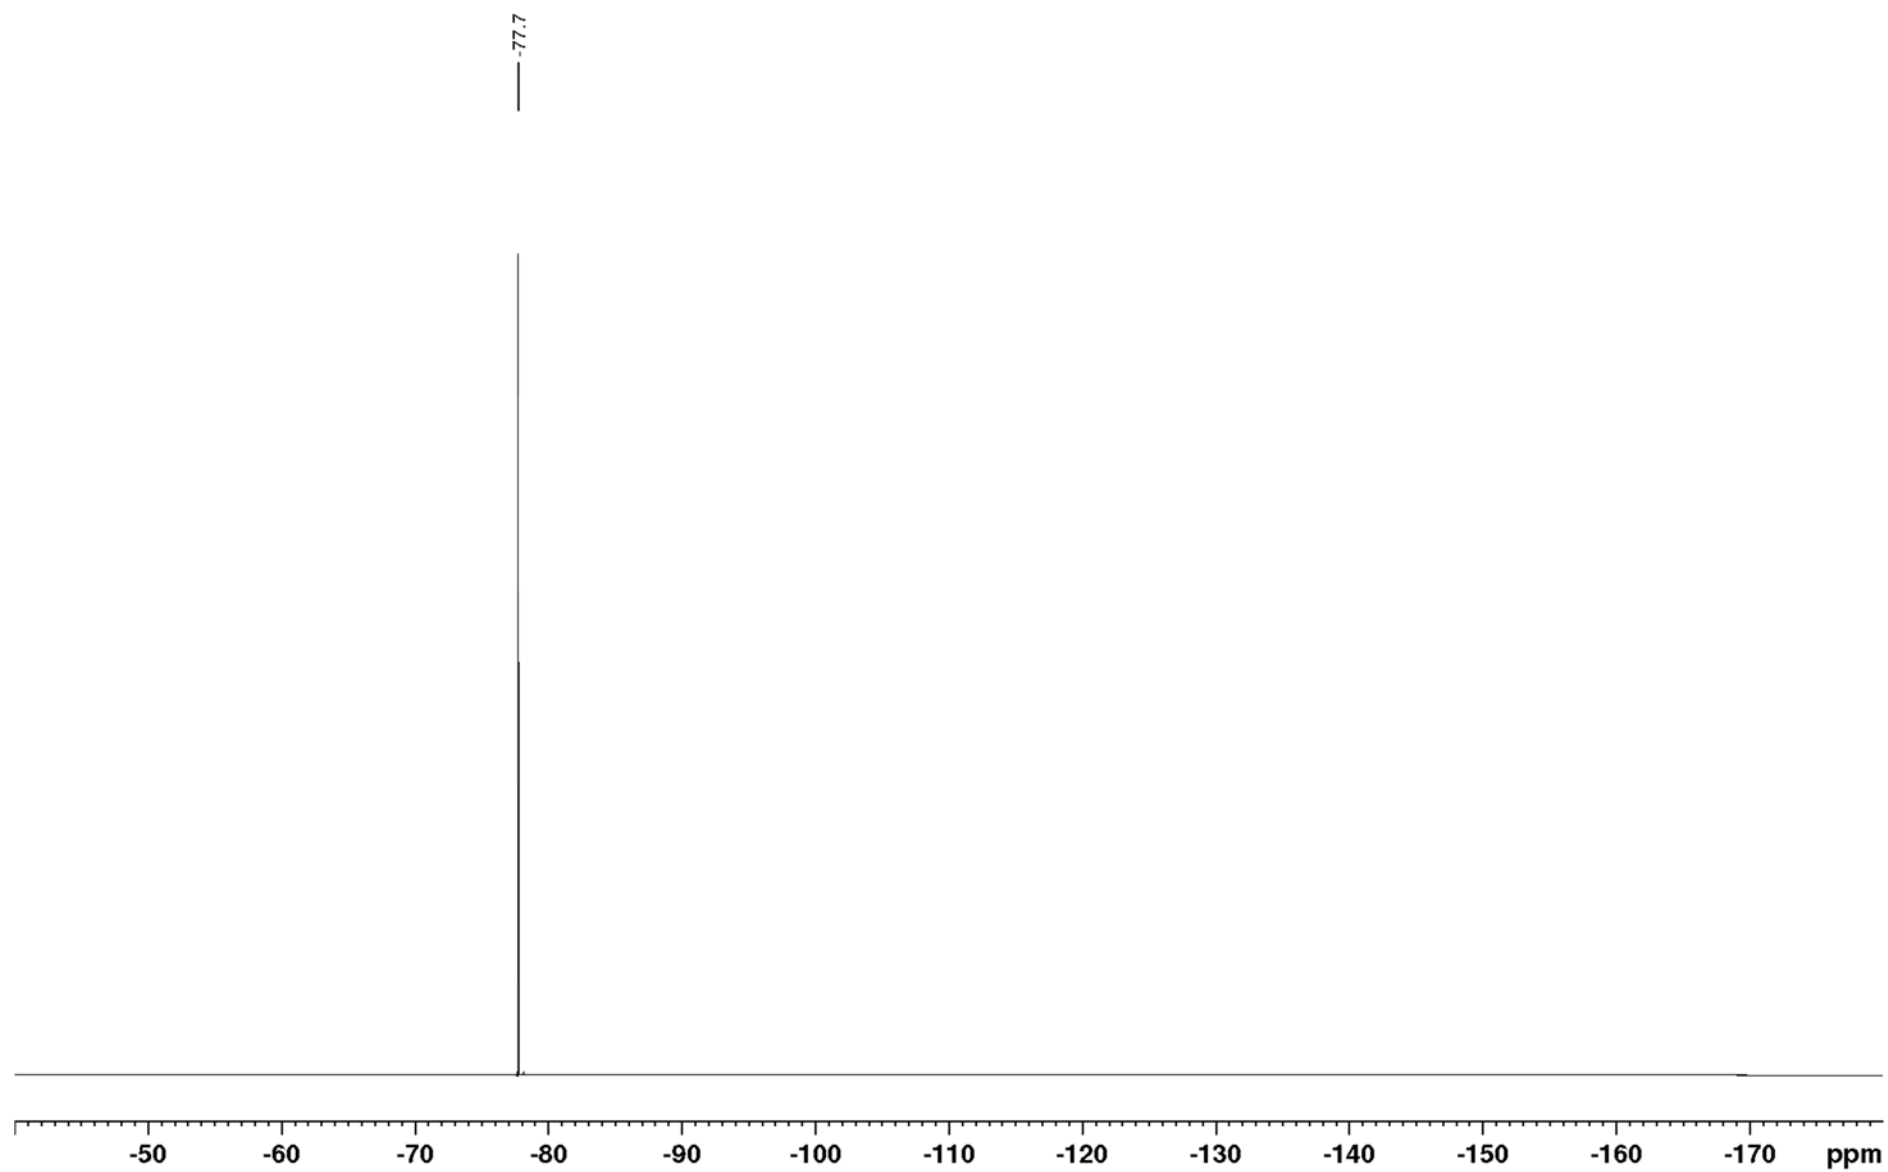

## SUPPORTING INFORMATION

***N,N,N*-Trimethyl-1-[4-(trifluoromethyl)phenyl]ethan-1-aminium trifluoromethanesulfonate (1i)**<sup>1</sup>H NMR (400 MHz, DMSO-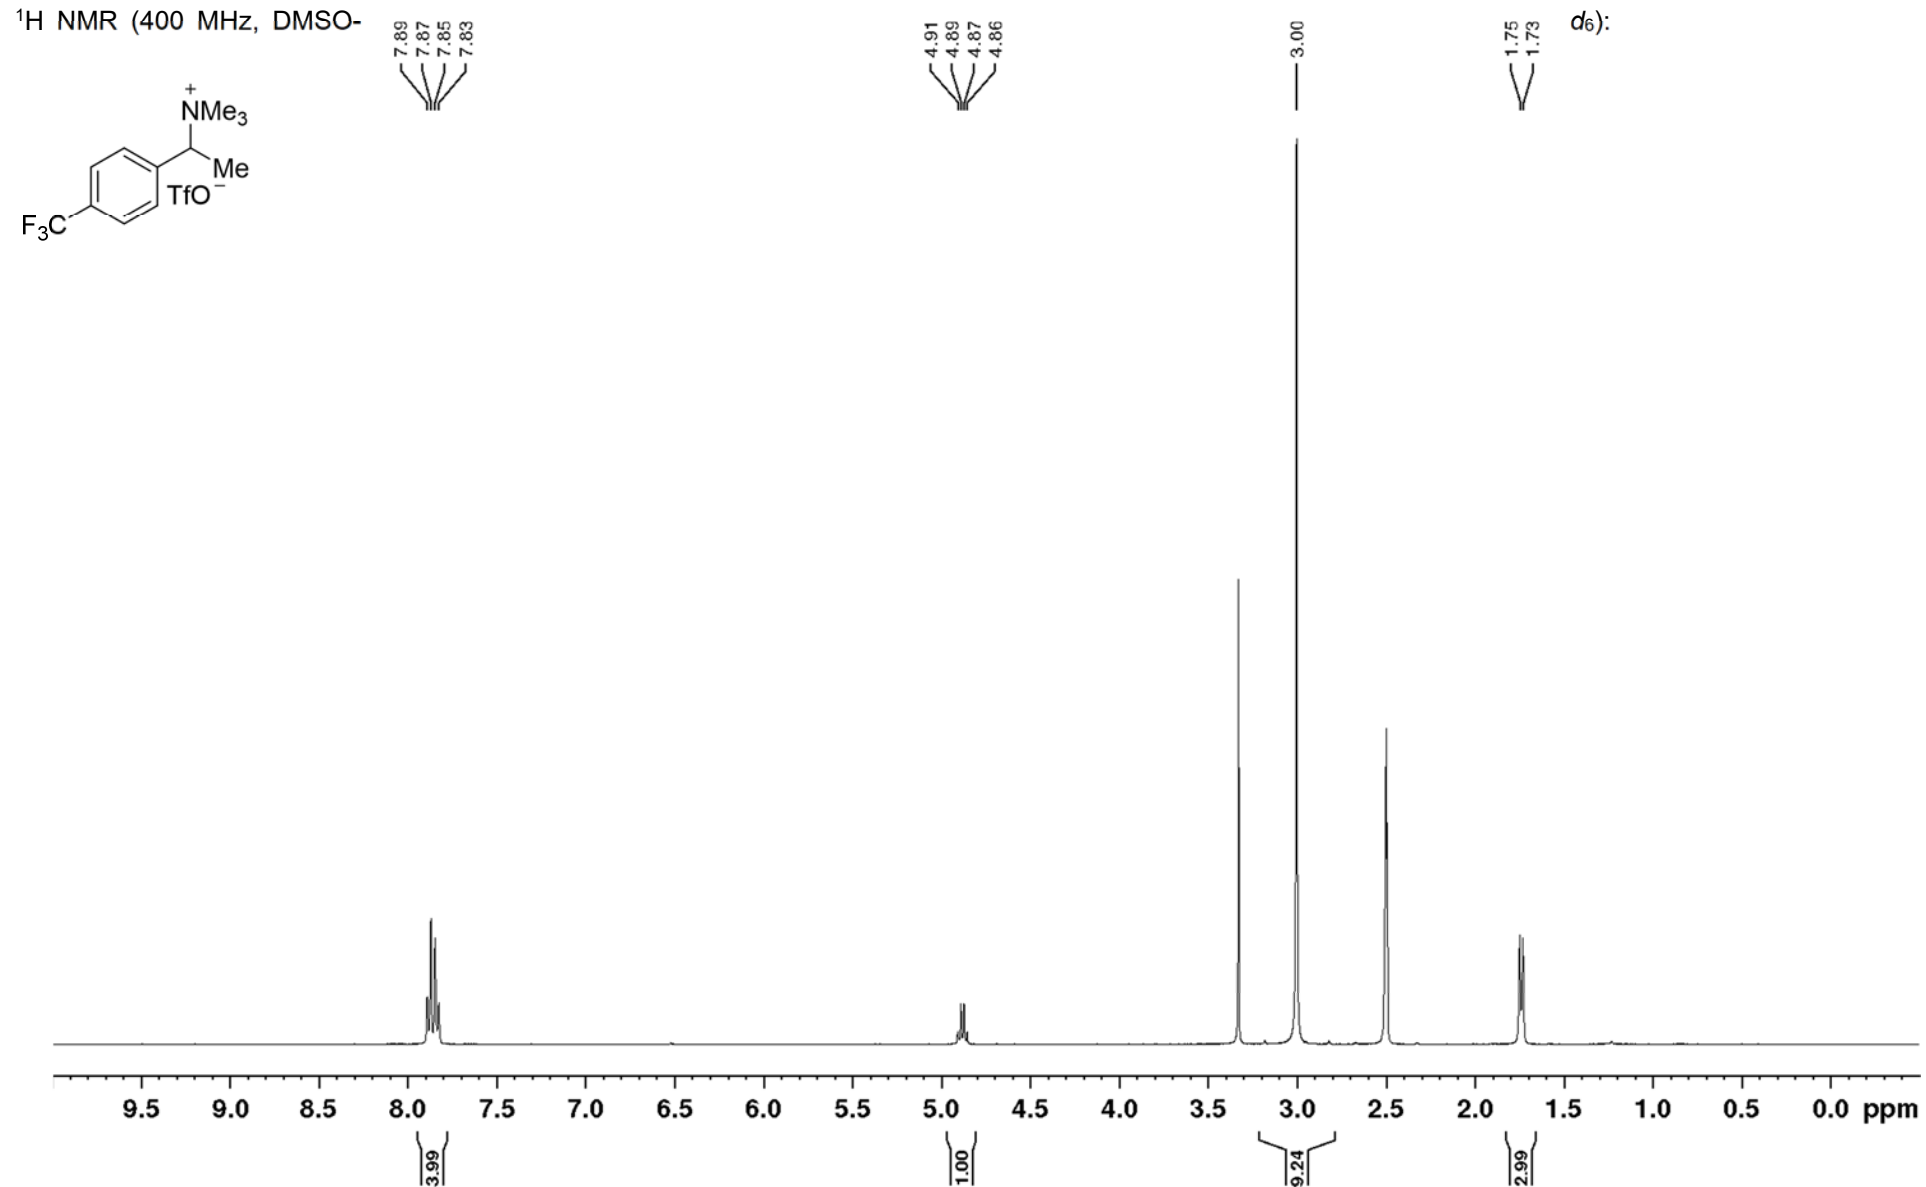

## SUPPORTING INFORMATION

 $^{13}\text{C}\{^1\text{H}\}$  NMR (126 MHz,  $\text{DMSO-}d_6$ ):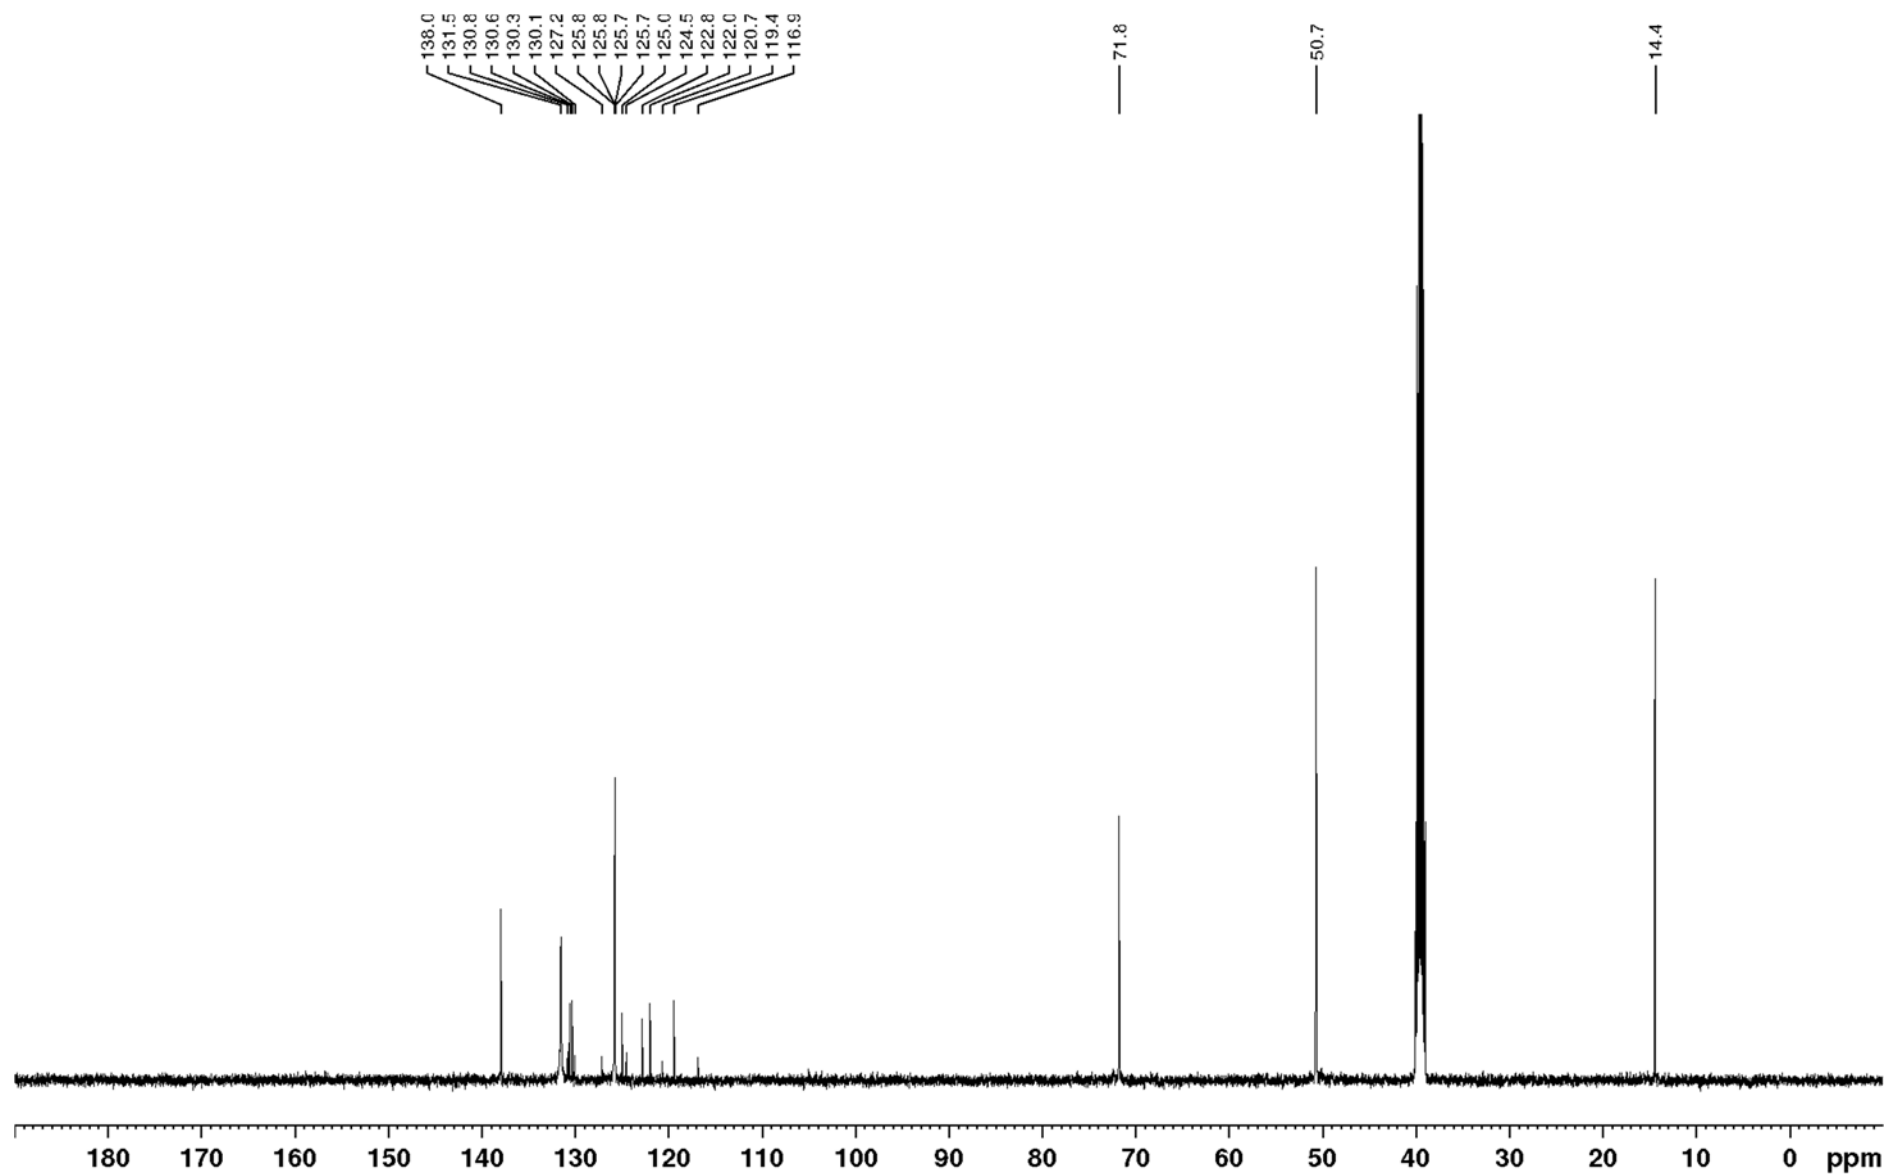

## SUPPORTING INFORMATION

 $^{13}\text{C}\{^{19}\text{F}\}$  DEPT NMR (126 MHz,  $\text{DMSO-}d_6$ ):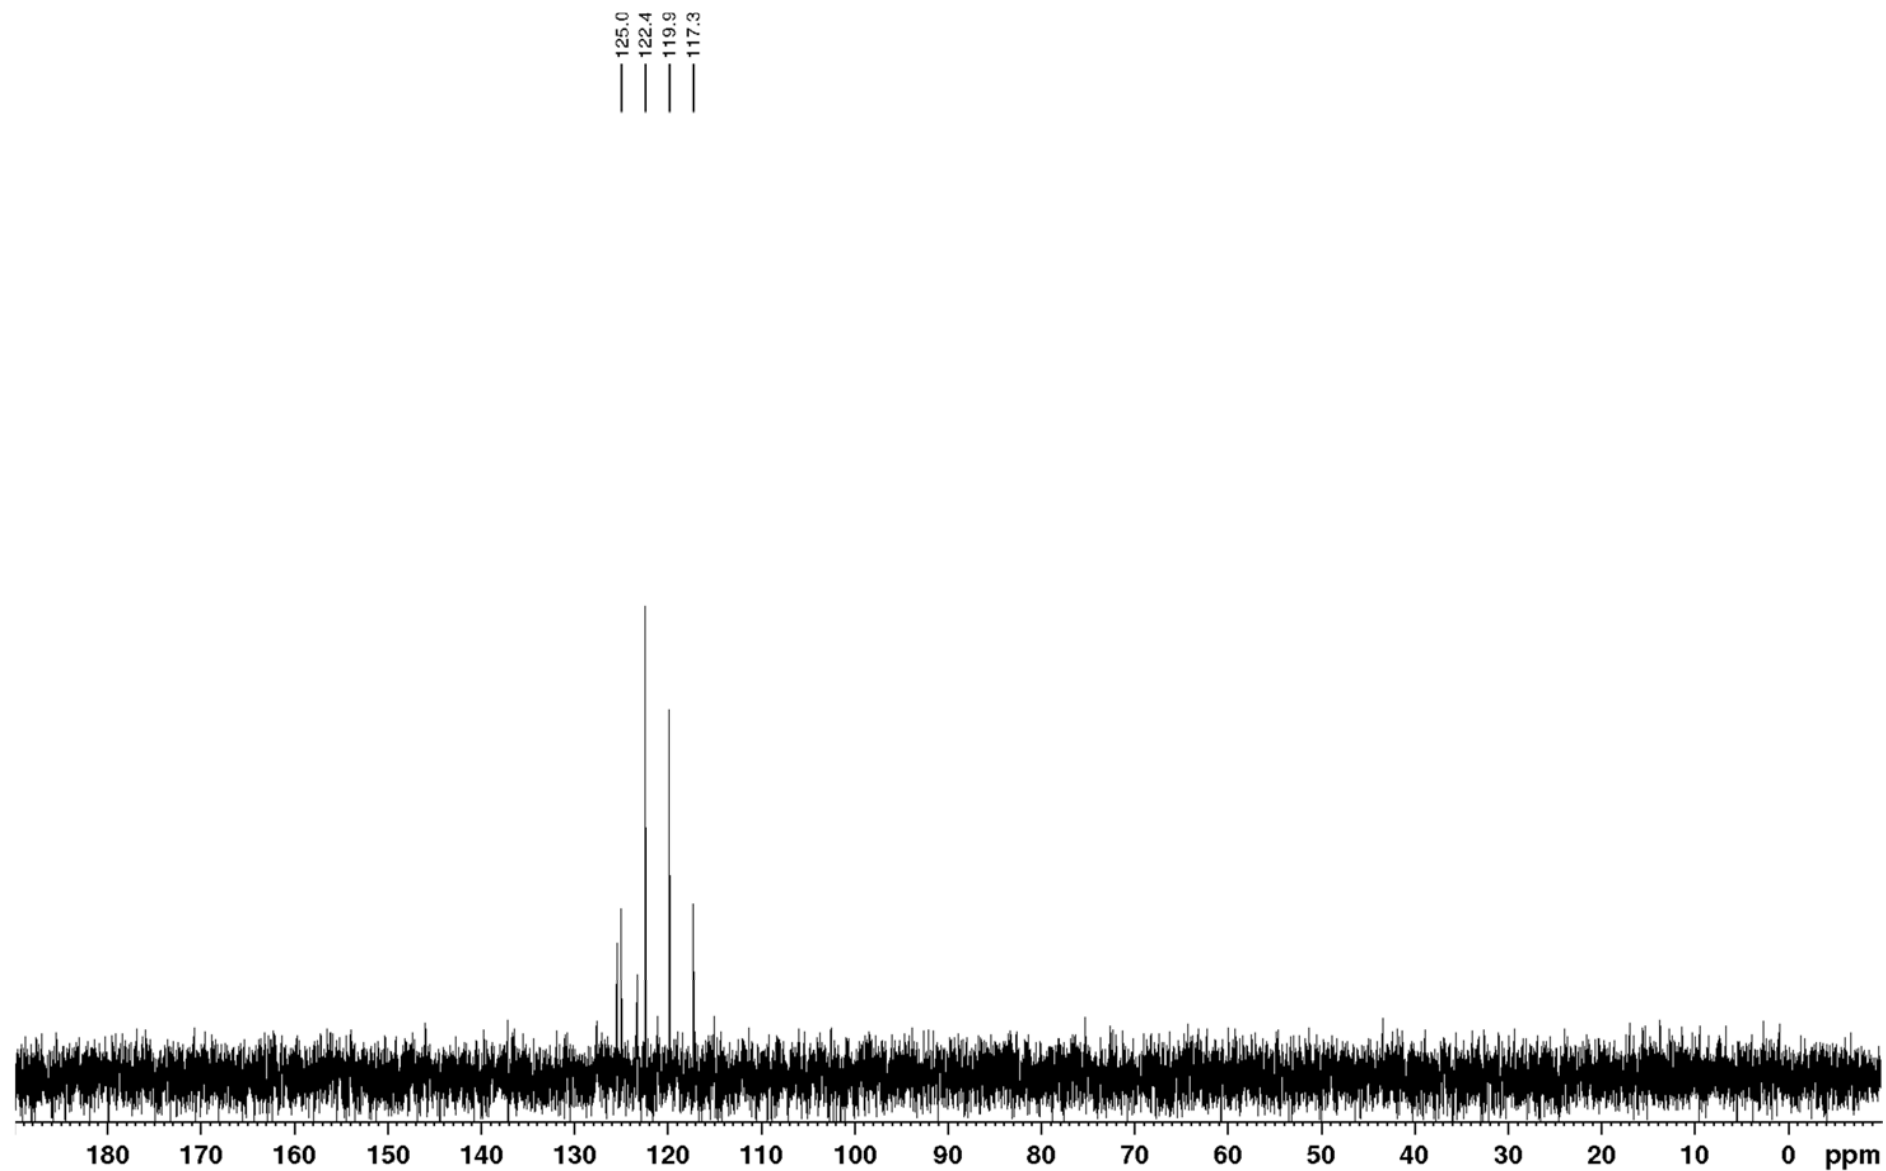

## SUPPORTING INFORMATION

 $^{19}\text{F}\{^1\text{H}\}$  NMR (471 MHz,  $\text{DMSO-}d_6$ ):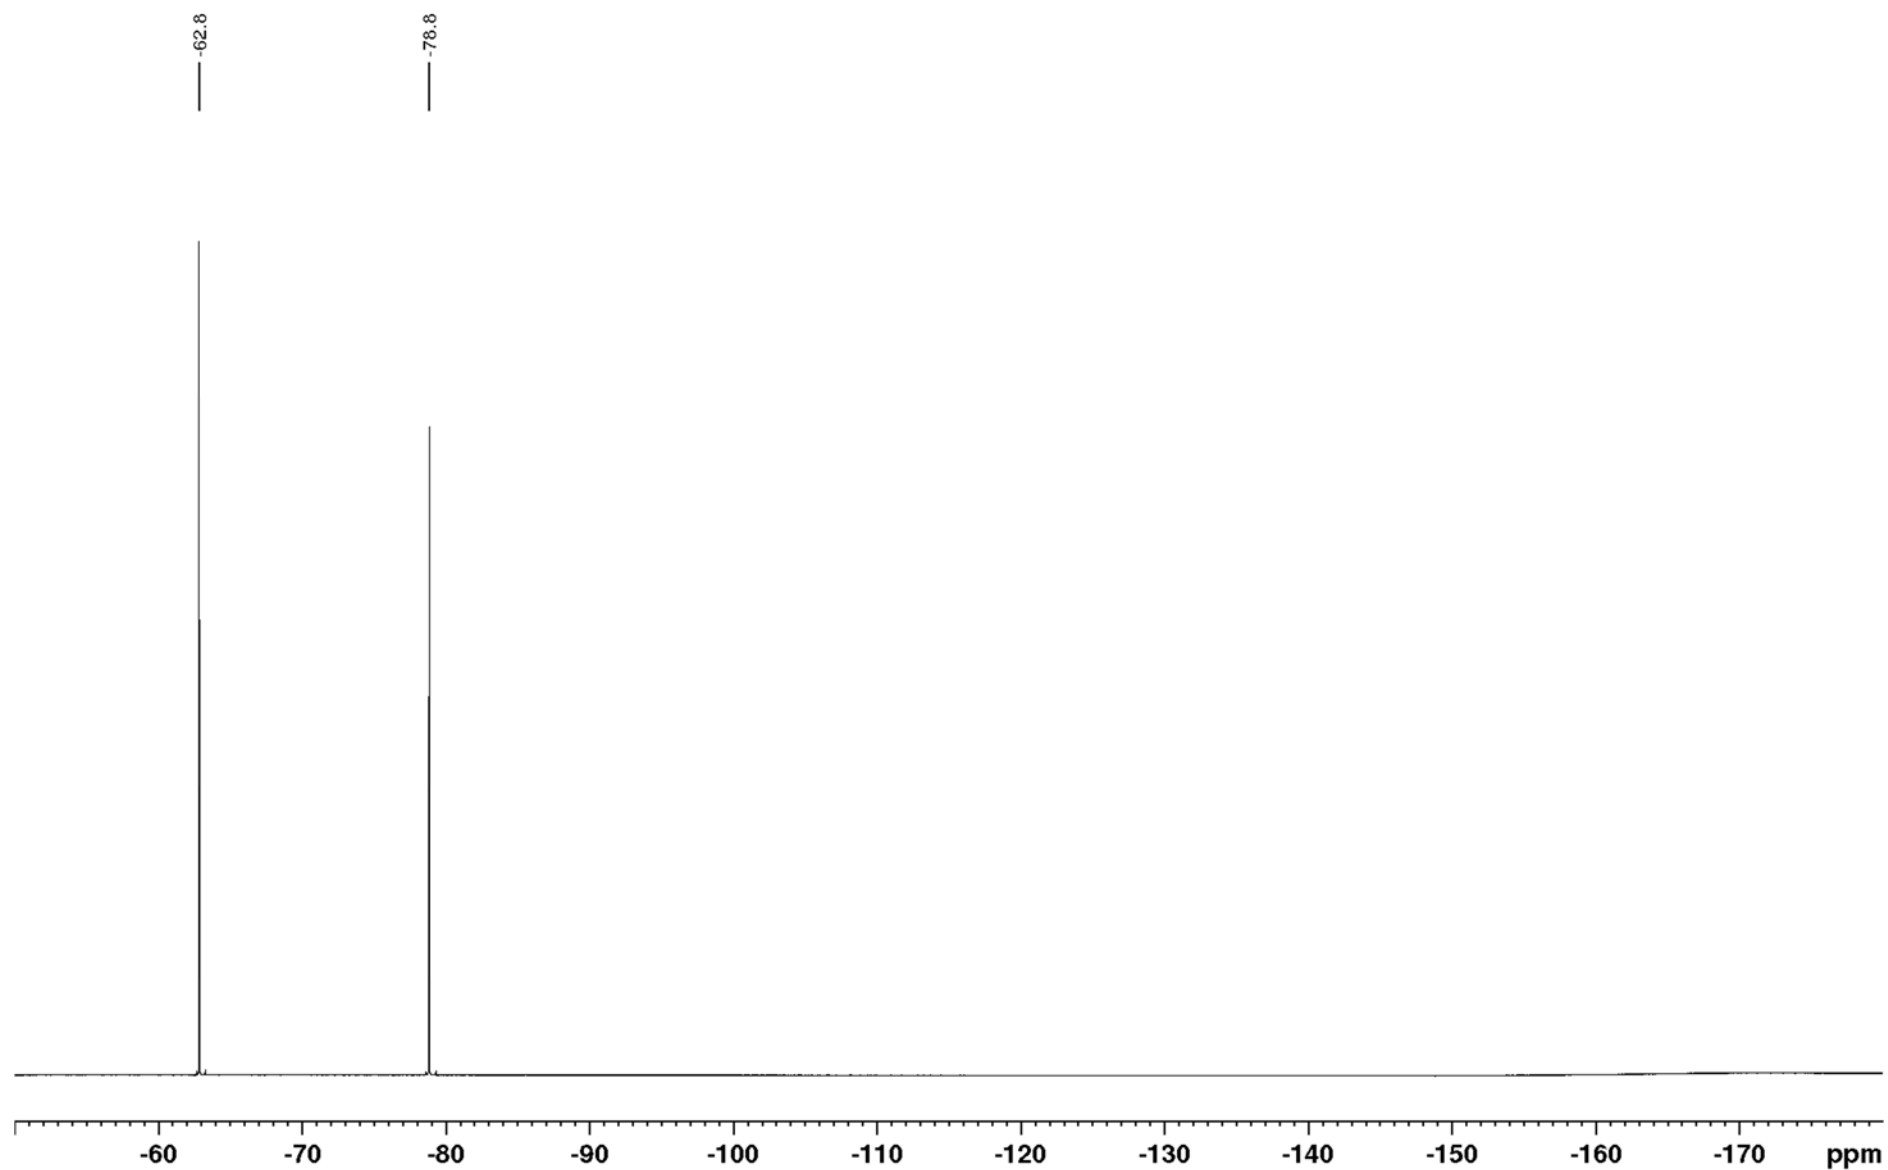

## SUPPORTING INFORMATION

1-(4-Cyanophenyl)-*N,N,N*-trimethylethan-1-aminium trifluoromethanesulfonate (1j) $^1\text{H}$  NMR (500 MHz, DMSO-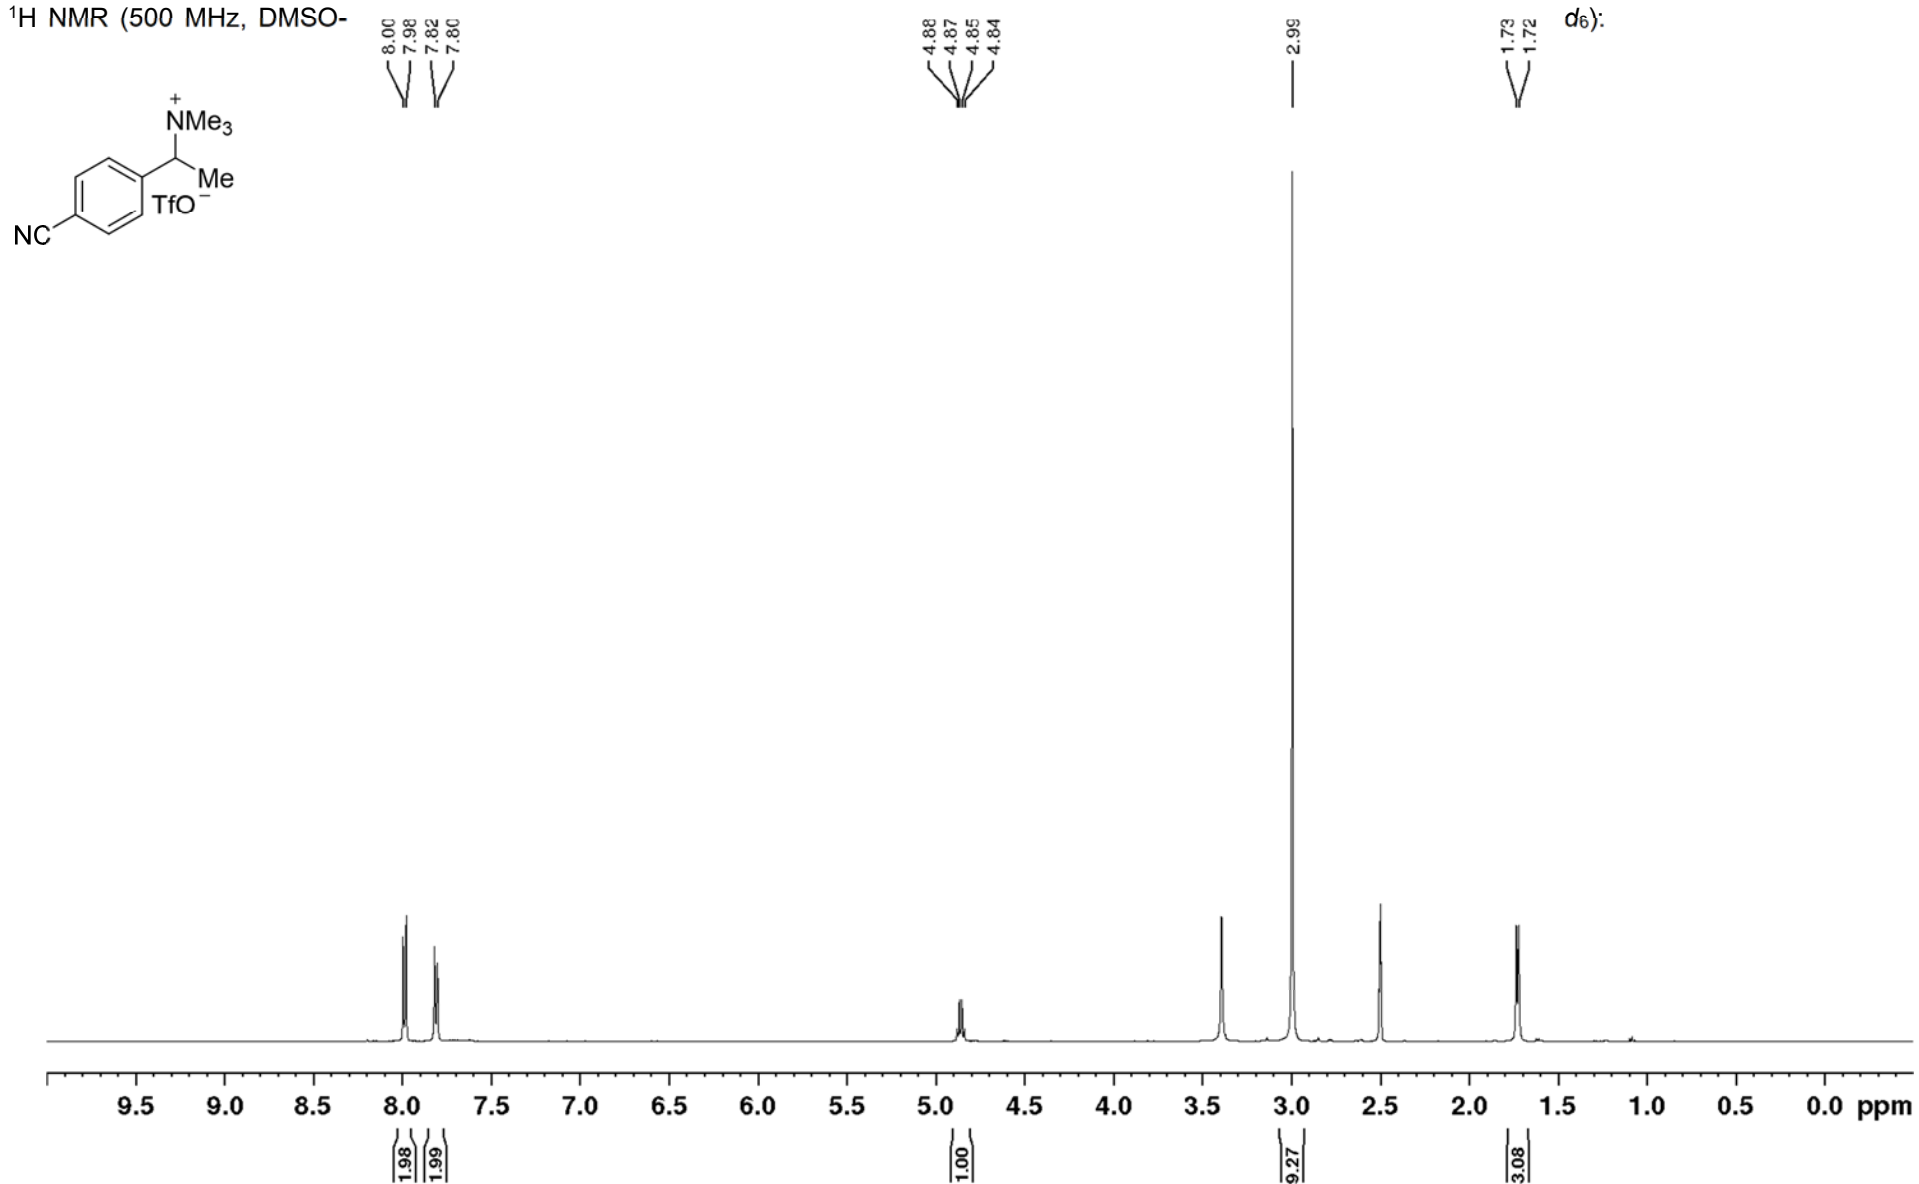

## SUPPORTING INFORMATION

 $^{13}\text{C}\{^1\text{H}\}$  NMR (126 MHz,  $\text{DMSO-}d_6$ ):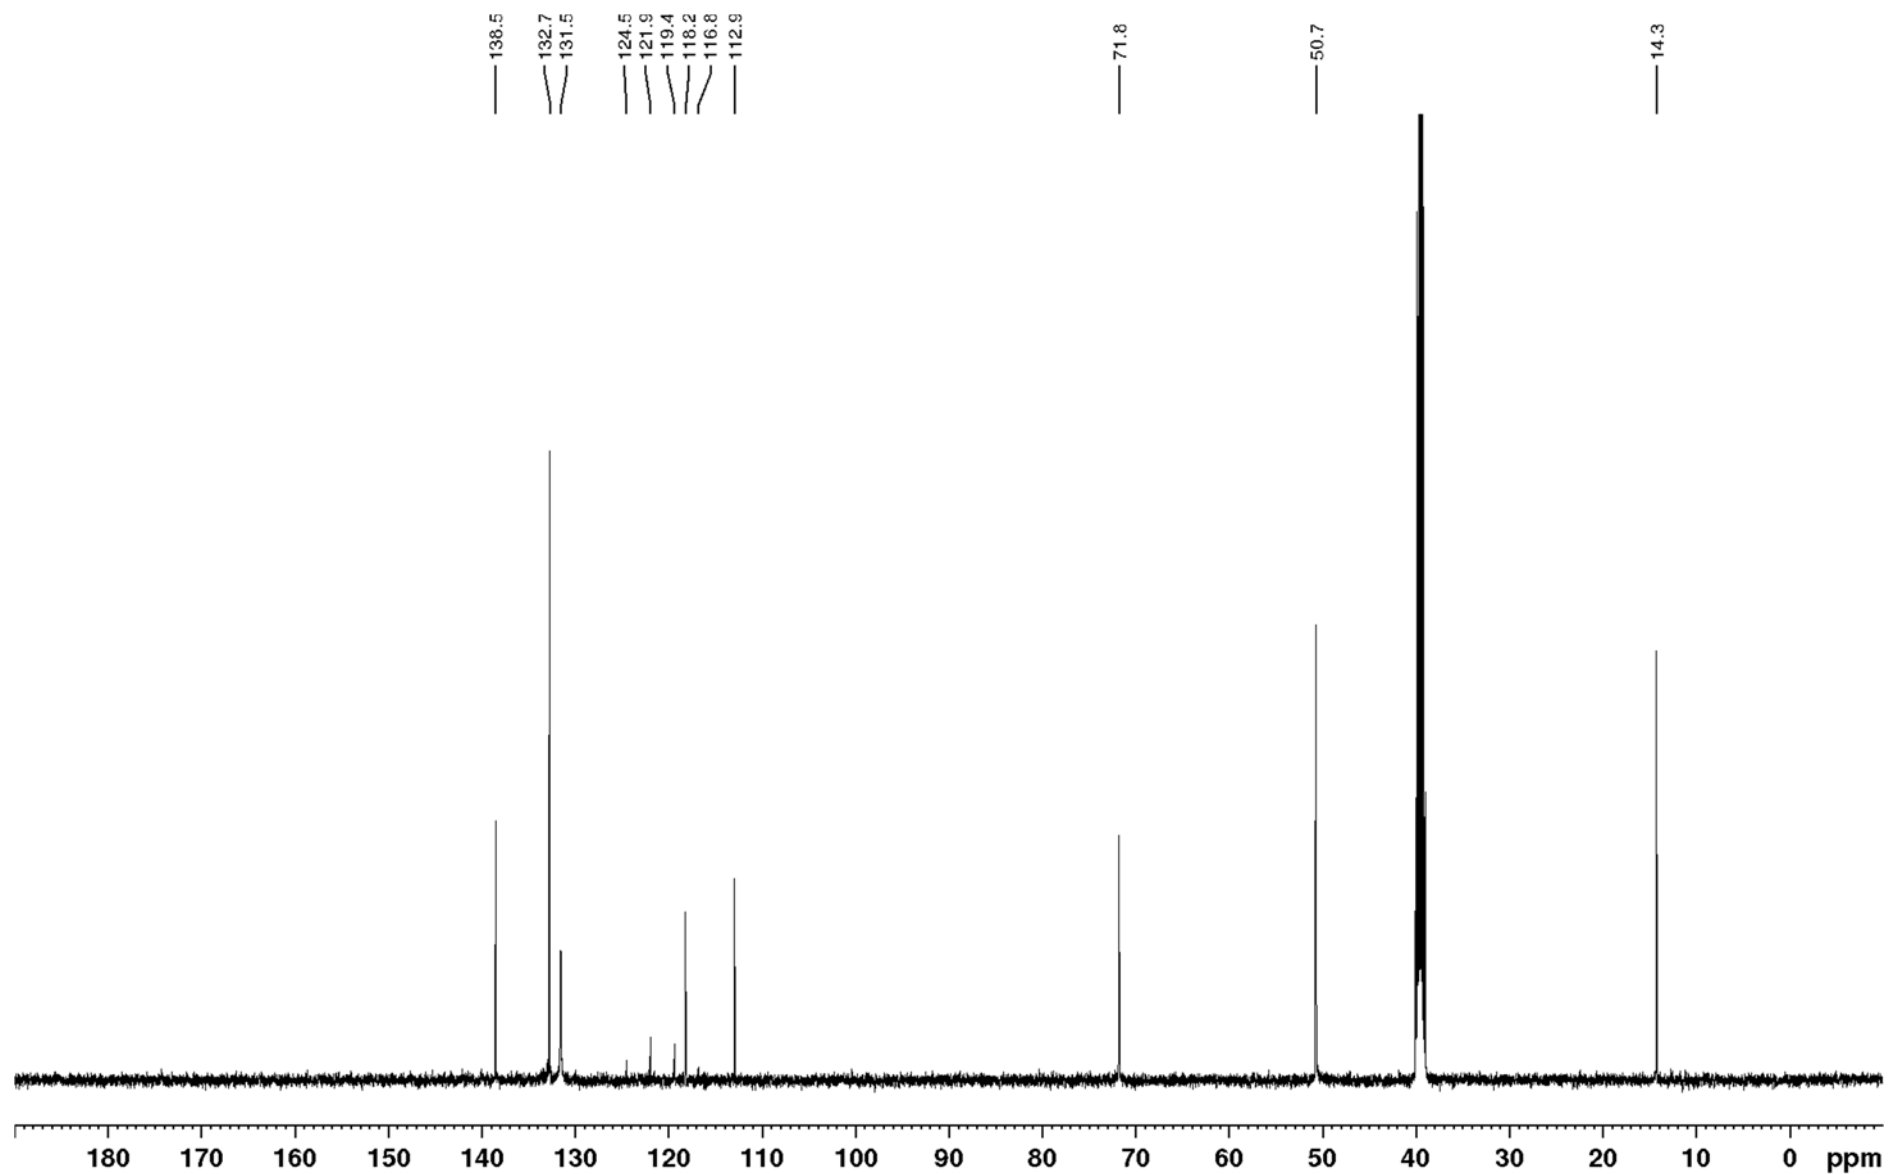



## SUPPORTING INFORMATION

 $^{13}\text{C}\{^{19}\text{F}\}$  DEPT NMR (176 MHz,  $\text{DMSO-}d_6$ ):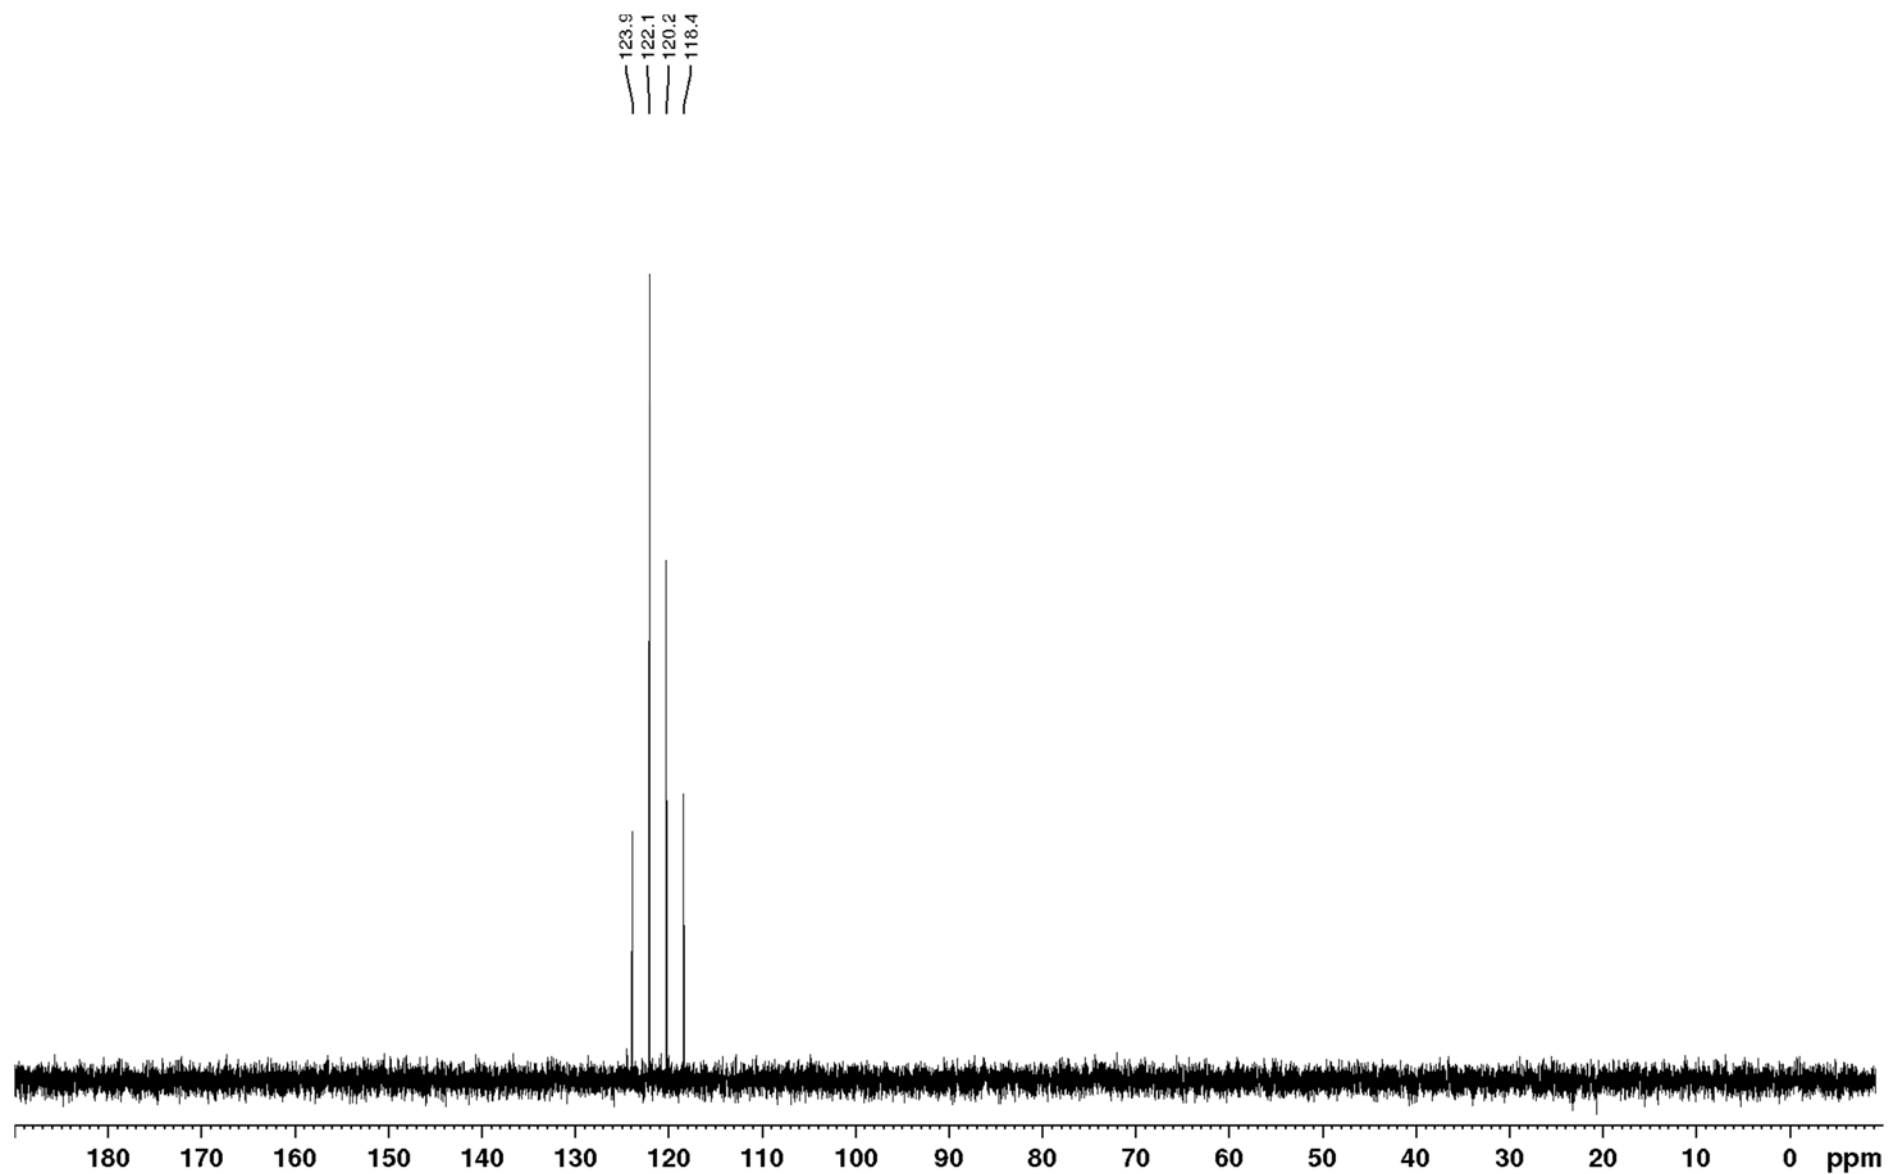

## SUPPORTING INFORMATION

 $^{19}\text{F}\{^1\text{H}\}$  NMR (471 MHz,  $\text{DMSO-}d_6$ ):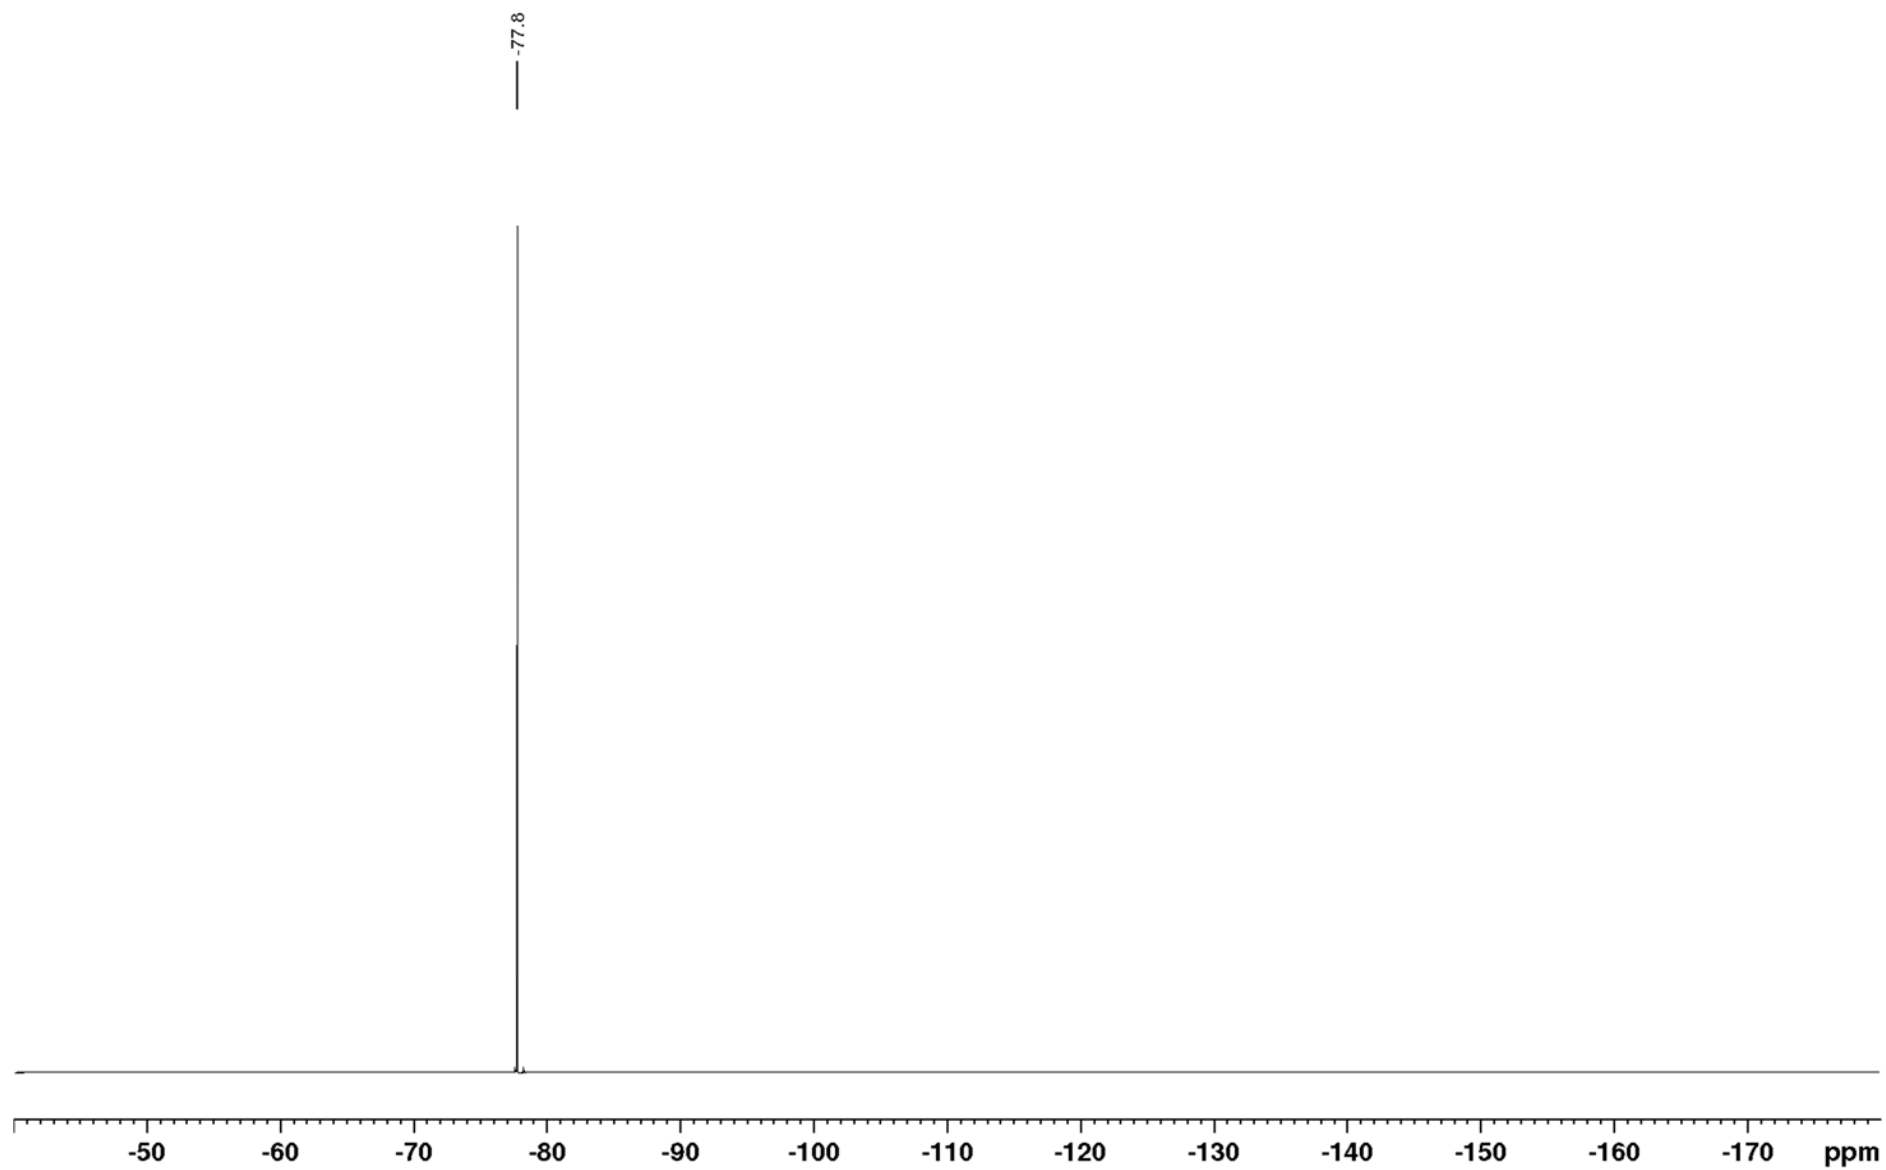

## SUPPORTING INFORMATION

**1-[4-(Methoxycarbonyl)phenyl]-*N,N,N*-trimethylethan-1-aminium trifluoromethanesulfonate (1k)**<sup>1</sup>H NMR (500 MHz, DMSO-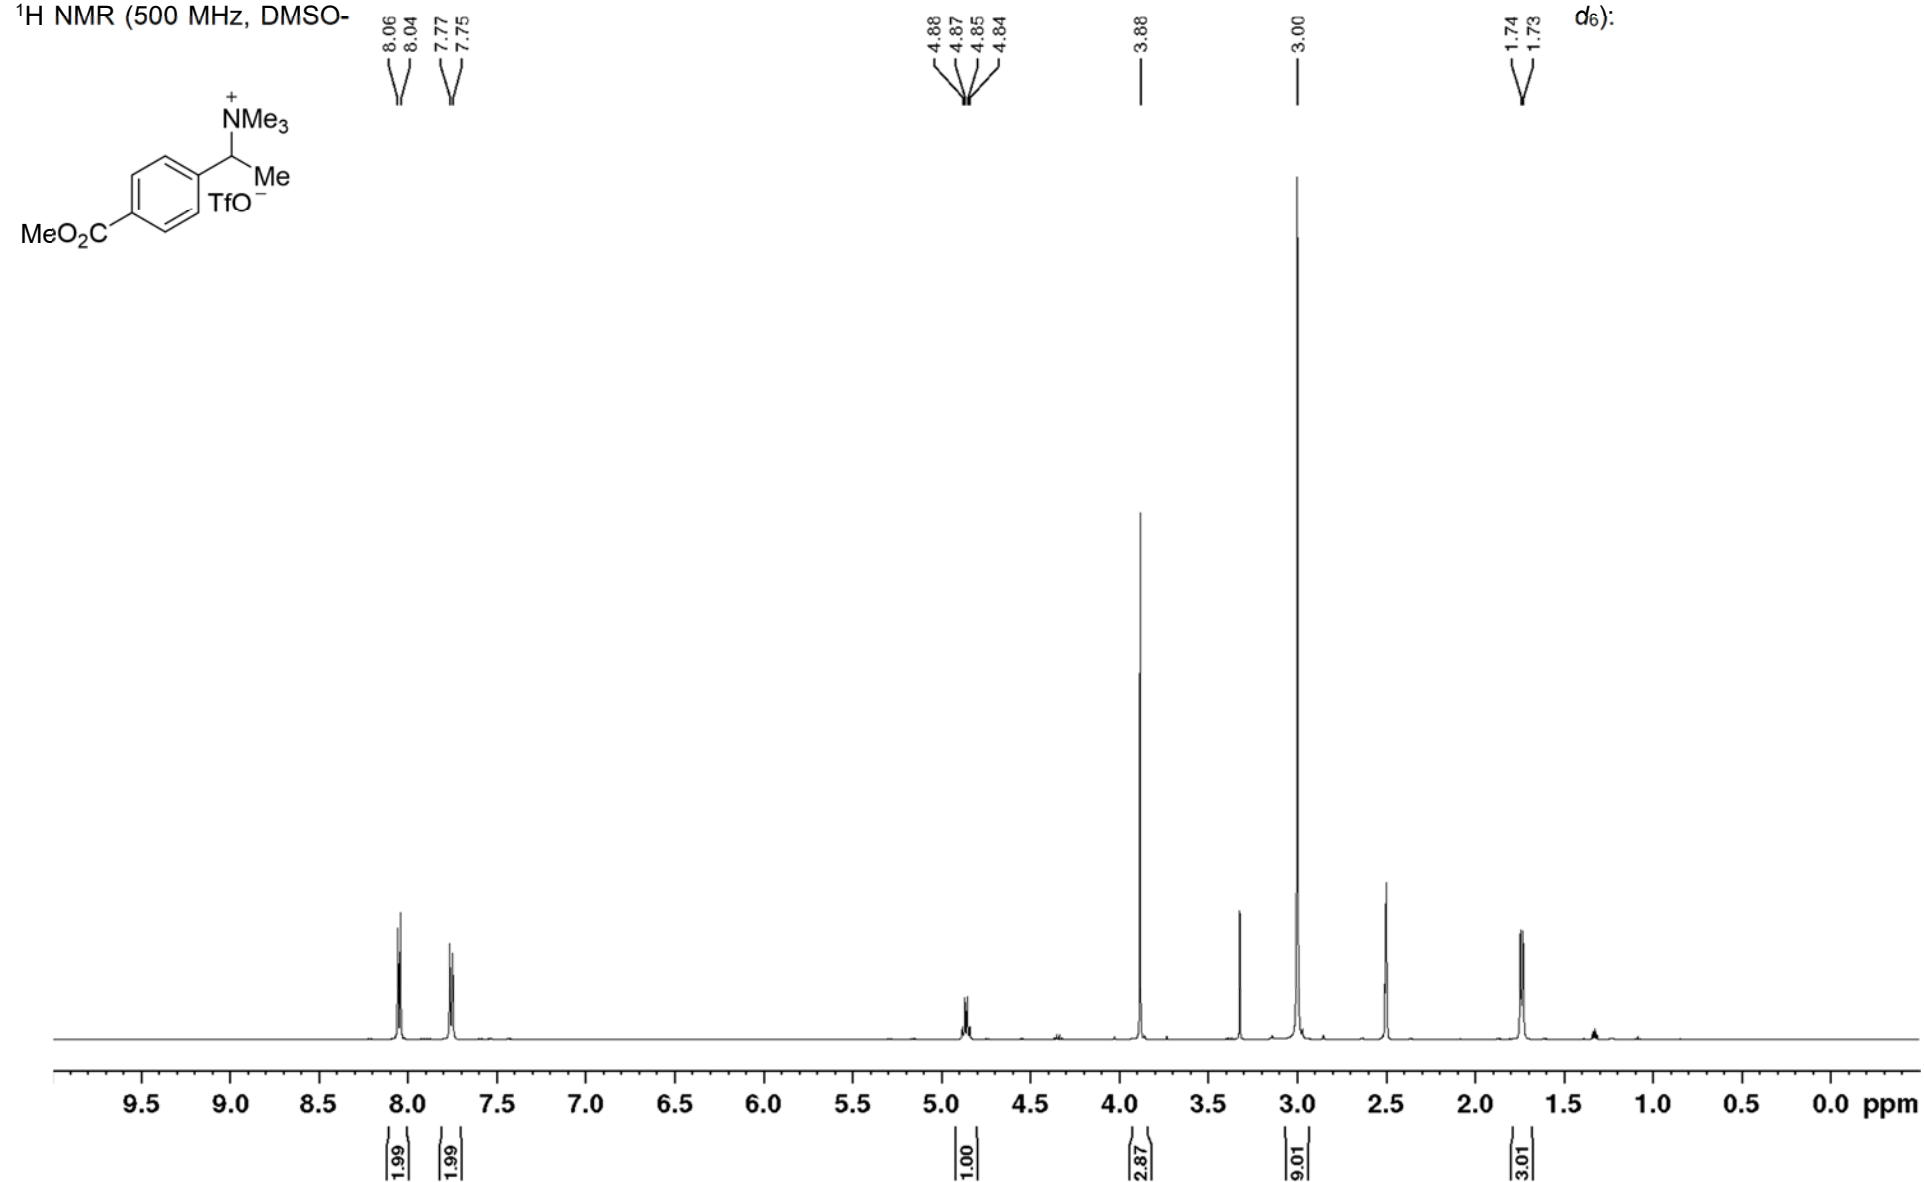

## SUPPORTING INFORMATION

 $^{13}\text{C}\{^1\text{H}\}$  NMR (126 MHz,  $\text{DMSO-}d_6$ ):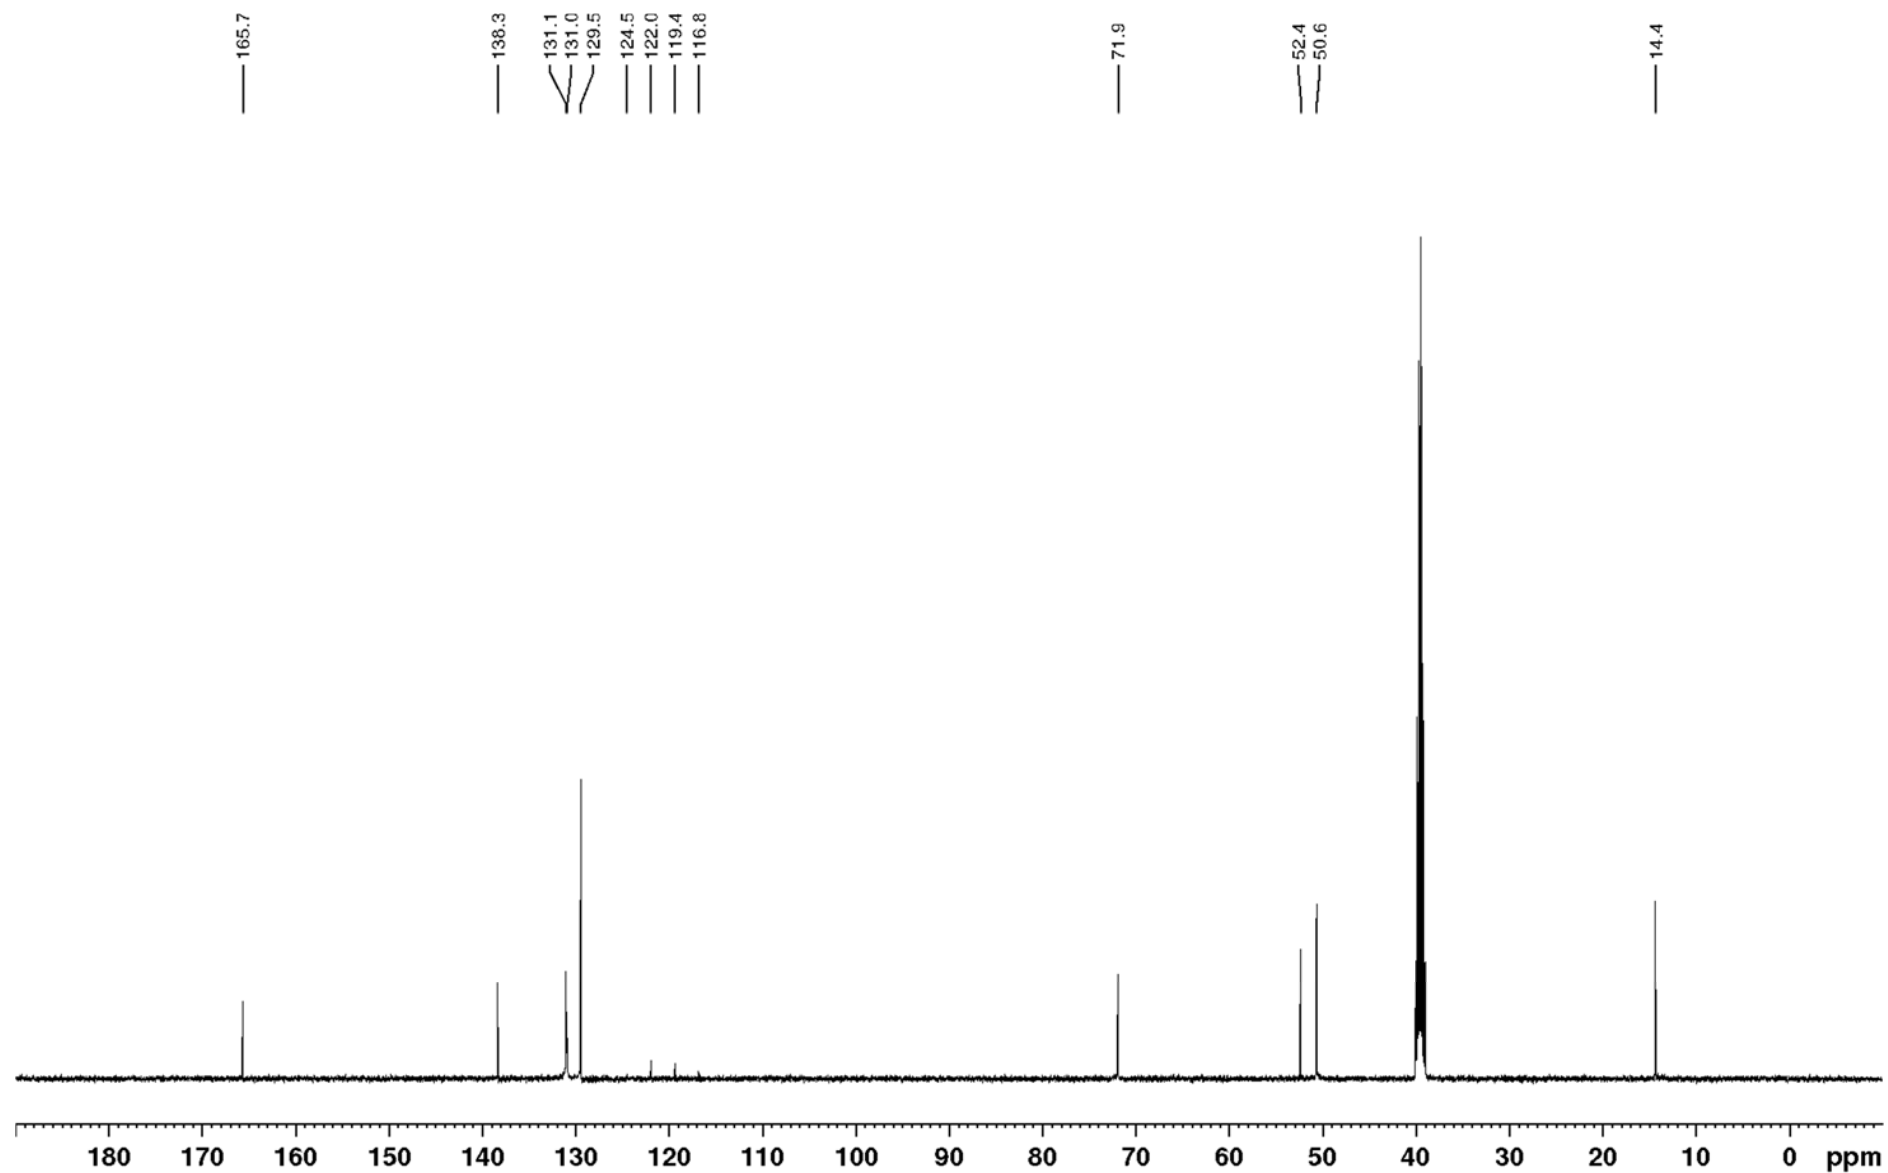

## SUPPORTING INFORMATION

 $^{13}\text{C}\{^{19}\text{F}\}$  DEPT NMR (176 MHz,  $\text{DMSO-}d_6$ ):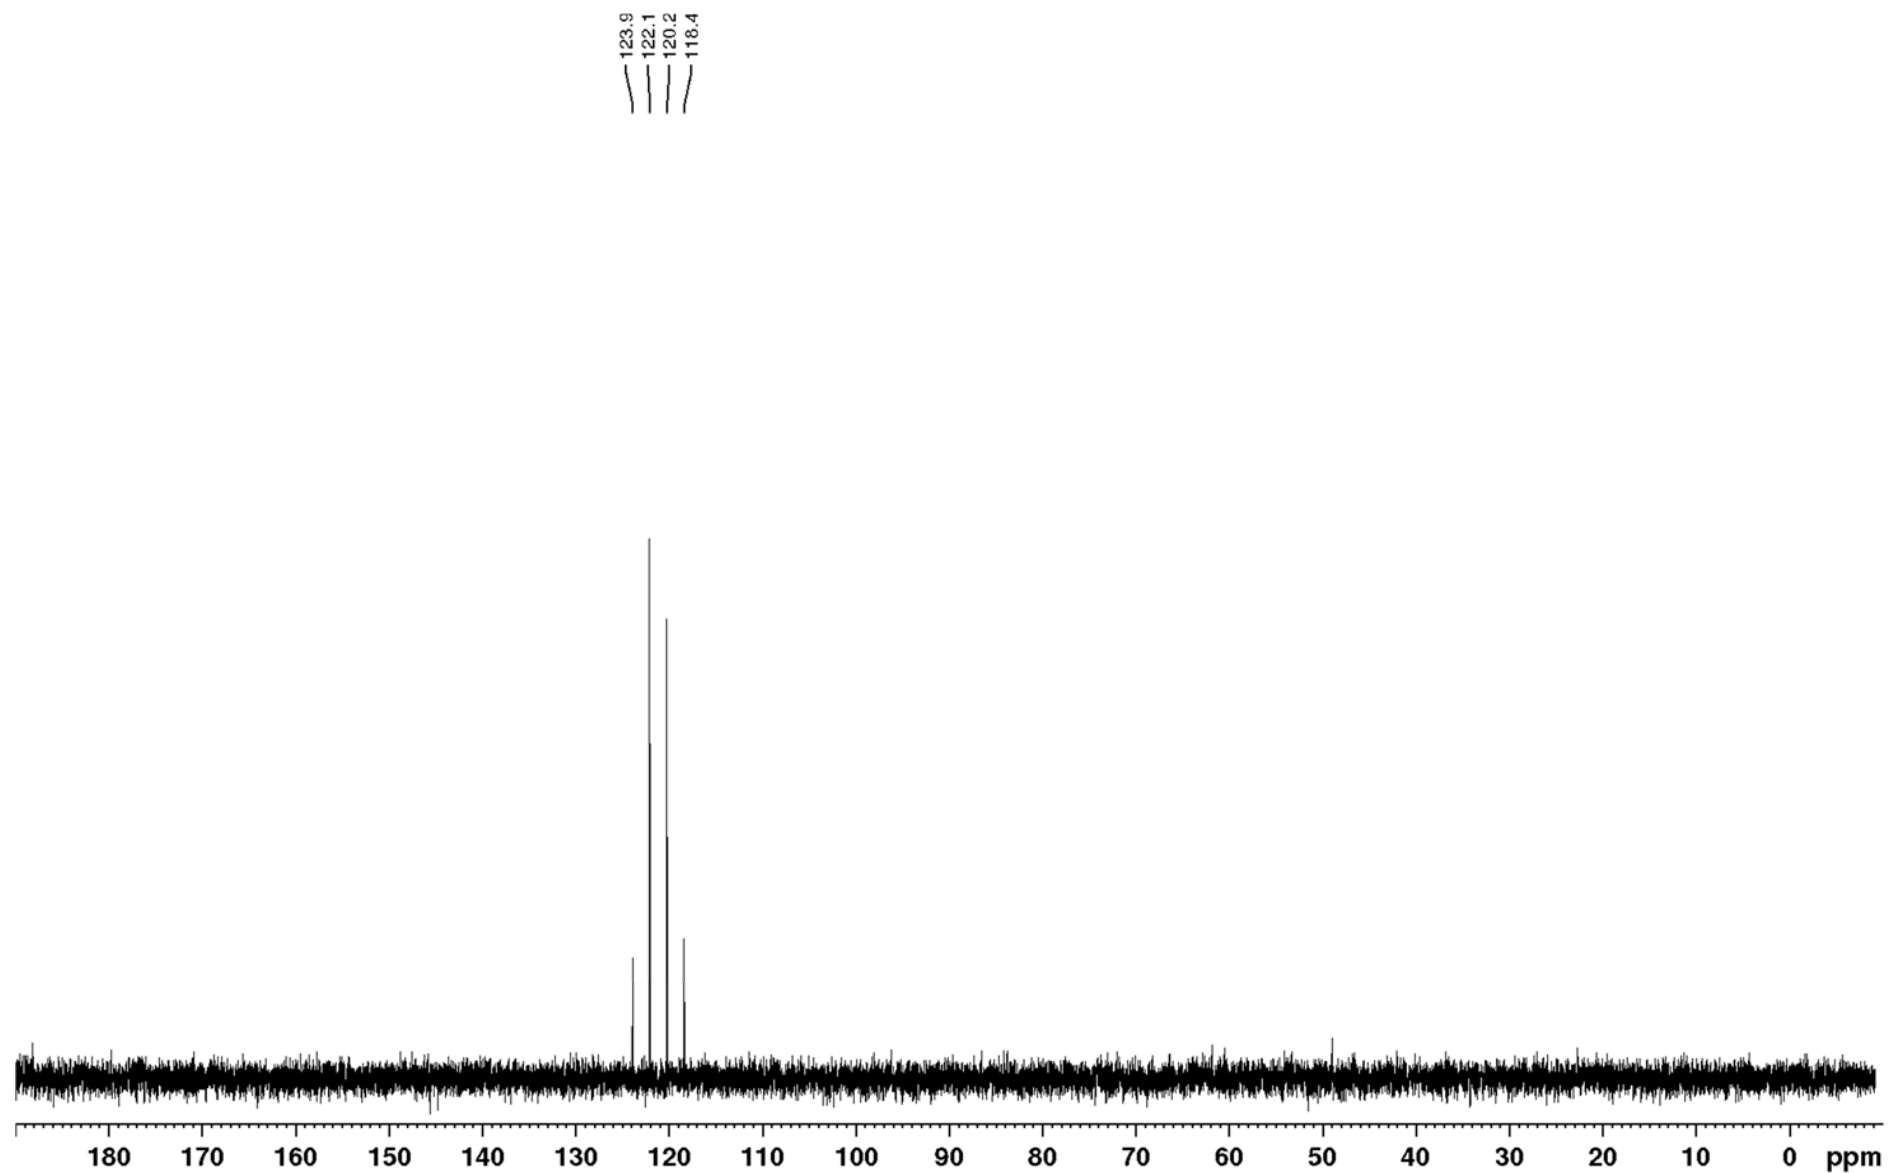

## SUPPORTING INFORMATION

 $^{19}\text{F}\{^1\text{H}\}$  NMR (659 MHz,  $\text{DMSO-}d_6$ ):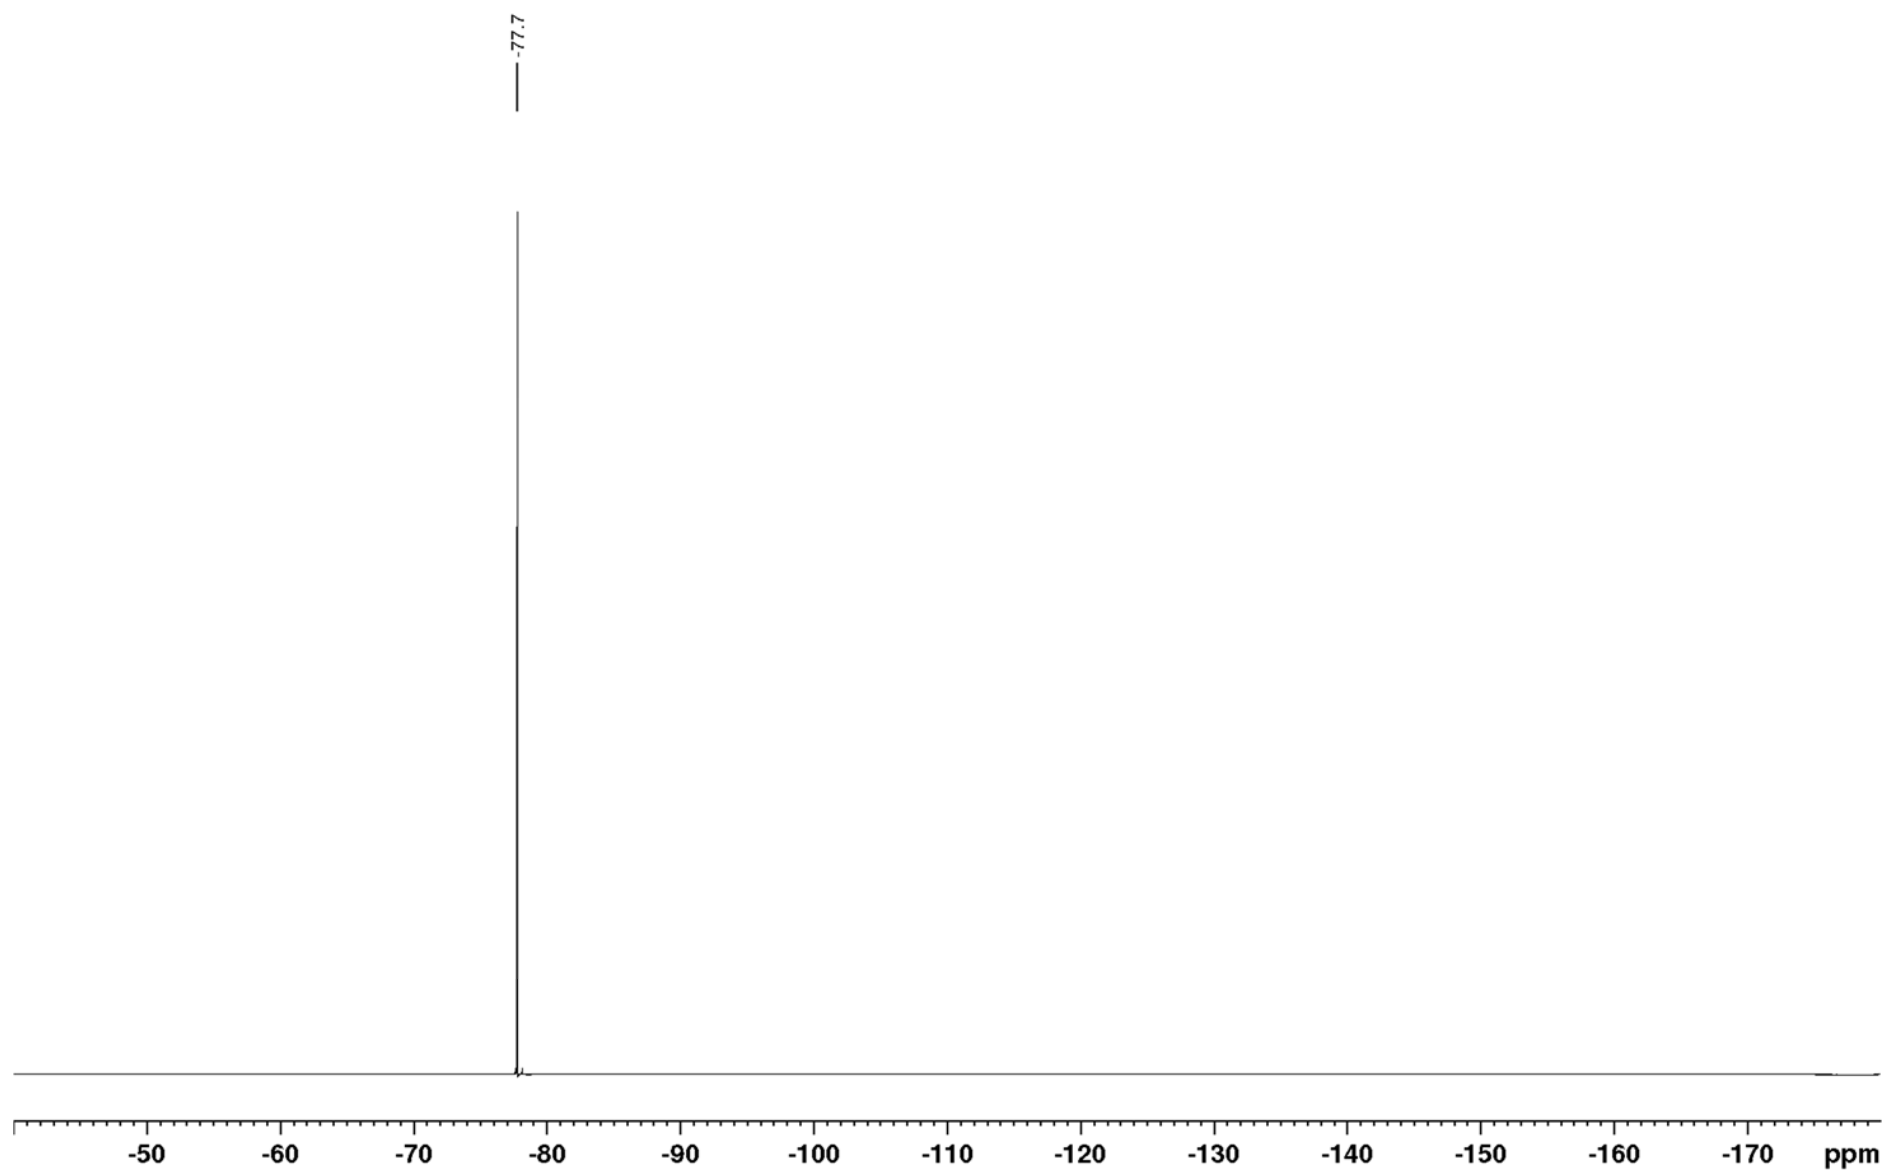

## SUPPORTING INFORMATION

***N,N,N*-Trimethyl-1-(naphthalen-1-yl)ethan-1-aminium trifluoromethanesulfonate (1I).**<sup>1</sup>H NMR (400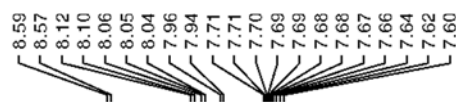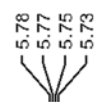

3.04

1.85  
1.84MHz, DMSO-d<sub>6</sub>):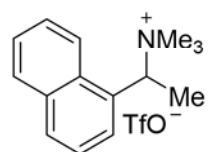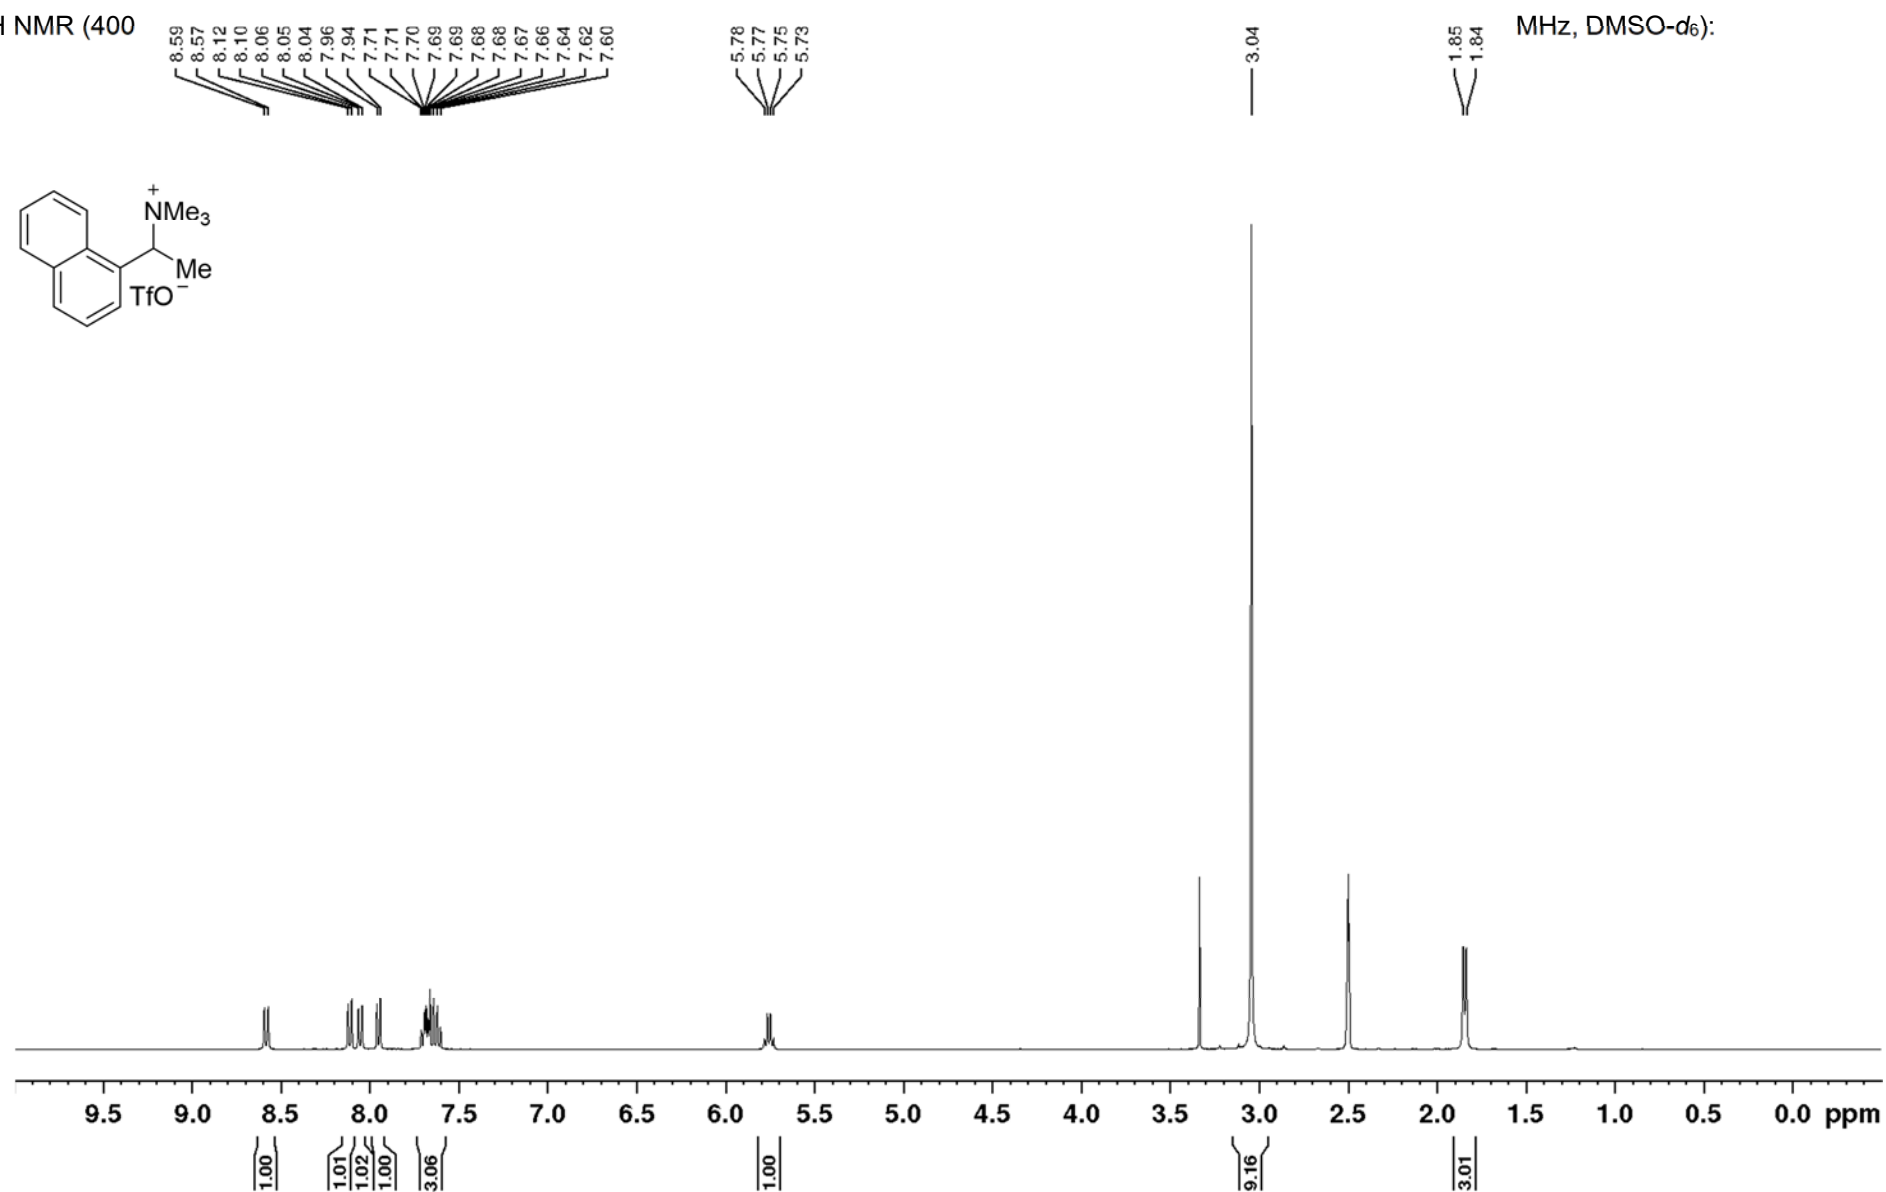

## SUPPORTING INFORMATION

 $^{13}\text{C}\{^1\text{H}\}$  NMR (101 MHz, DMSO- $d_6$ ):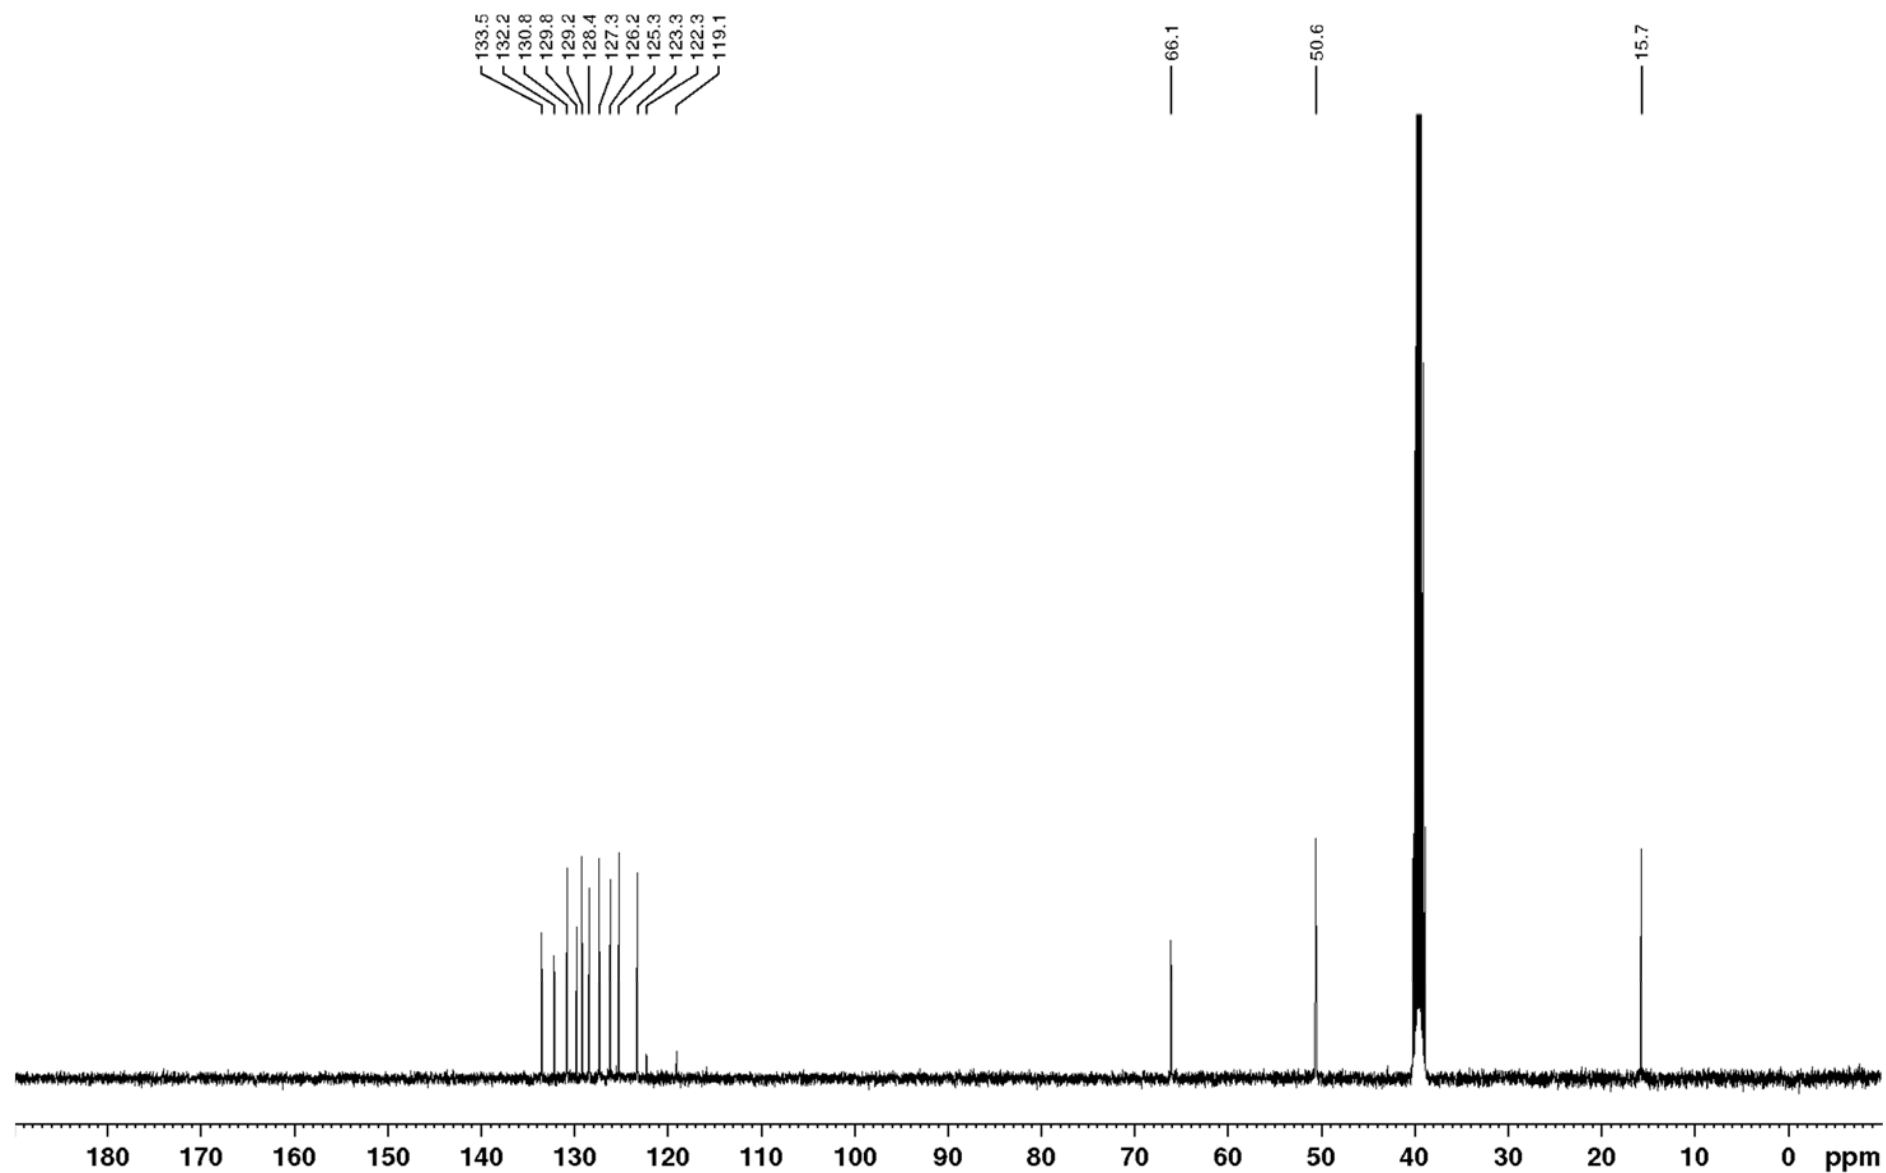



## SUPPORTING INFORMATION

 $^{13}\text{C}\{^{19}\text{F}\}$  DEPT NMR (126 MHz,  $\text{DMSO-}d_6$ ):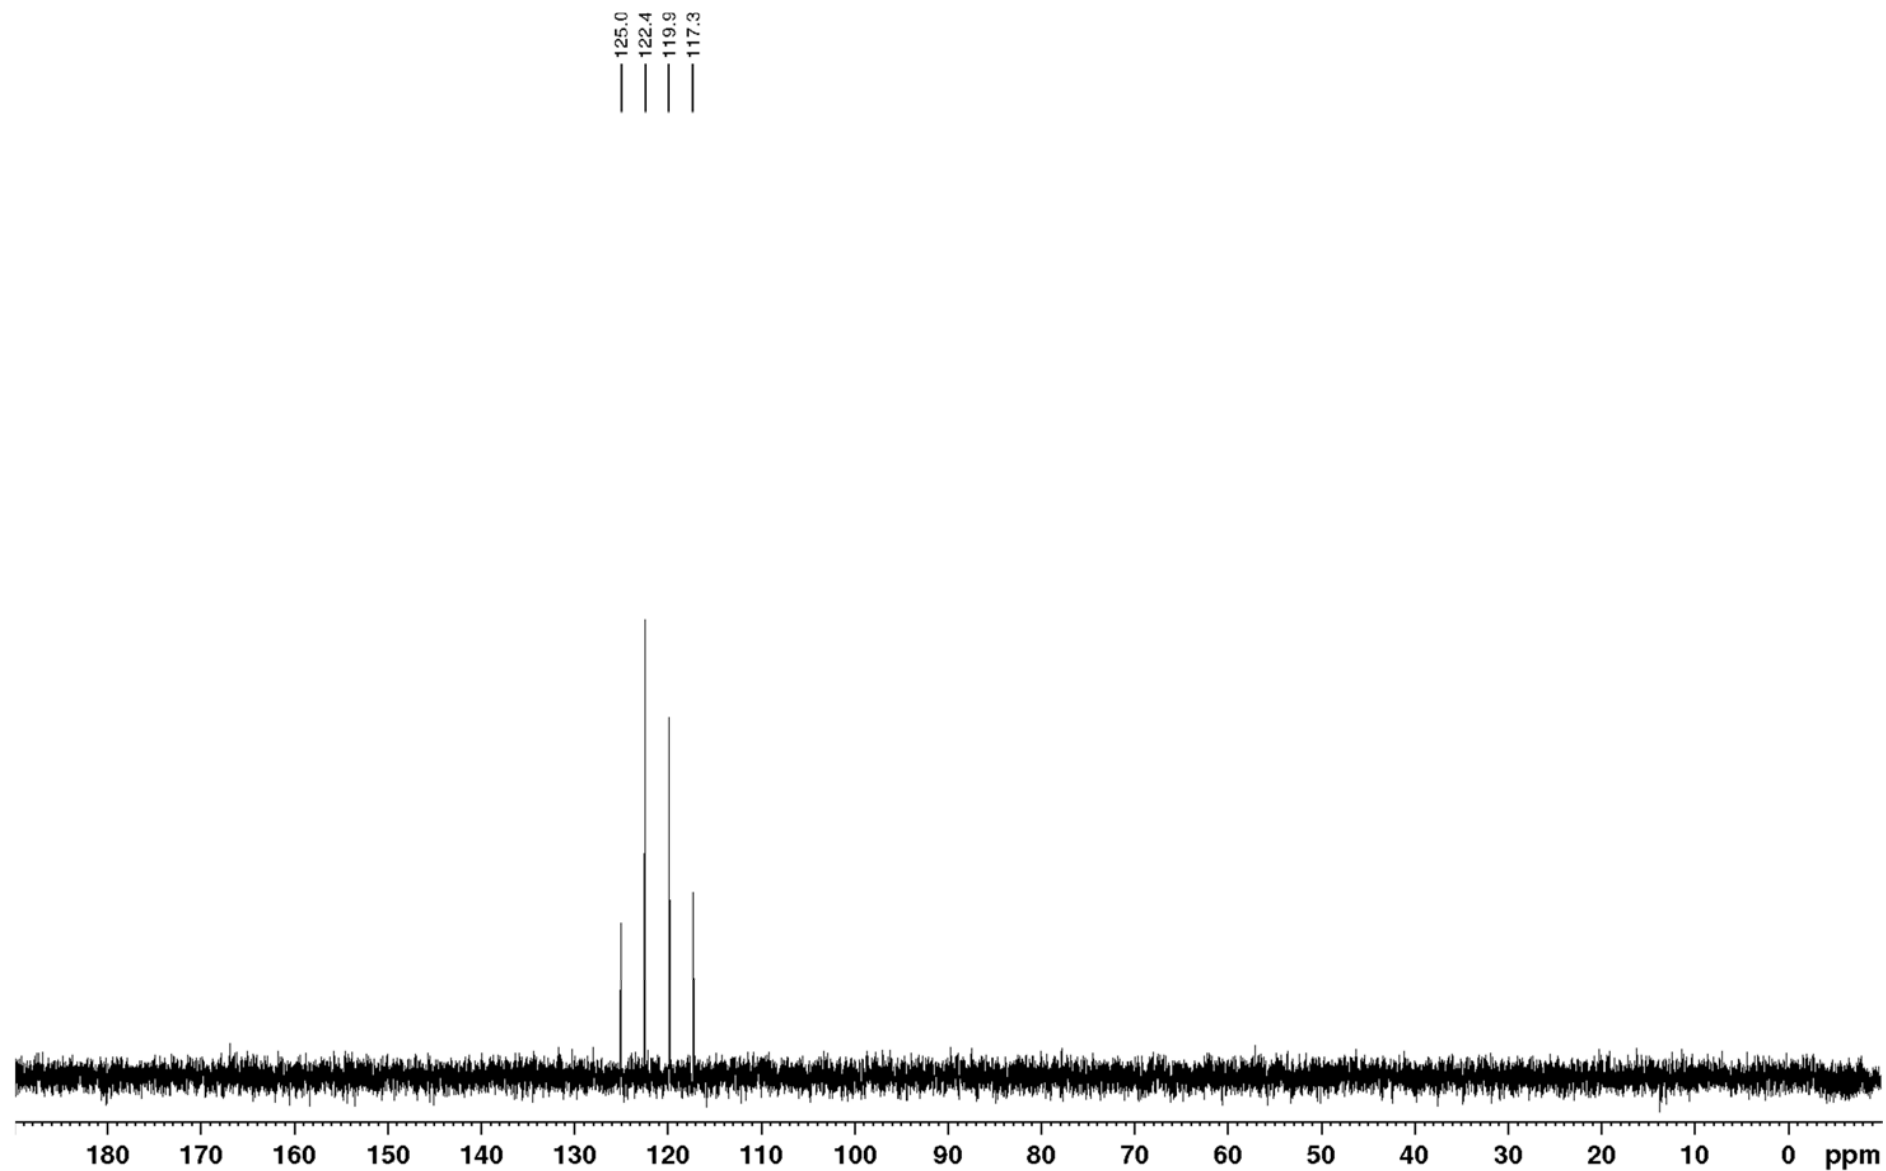

## SUPPORTING INFORMATION

 $^{19}\text{F}\{^1\text{H}\}$  NMR (471 MHz,  $\text{DMSO-}d_6$ ):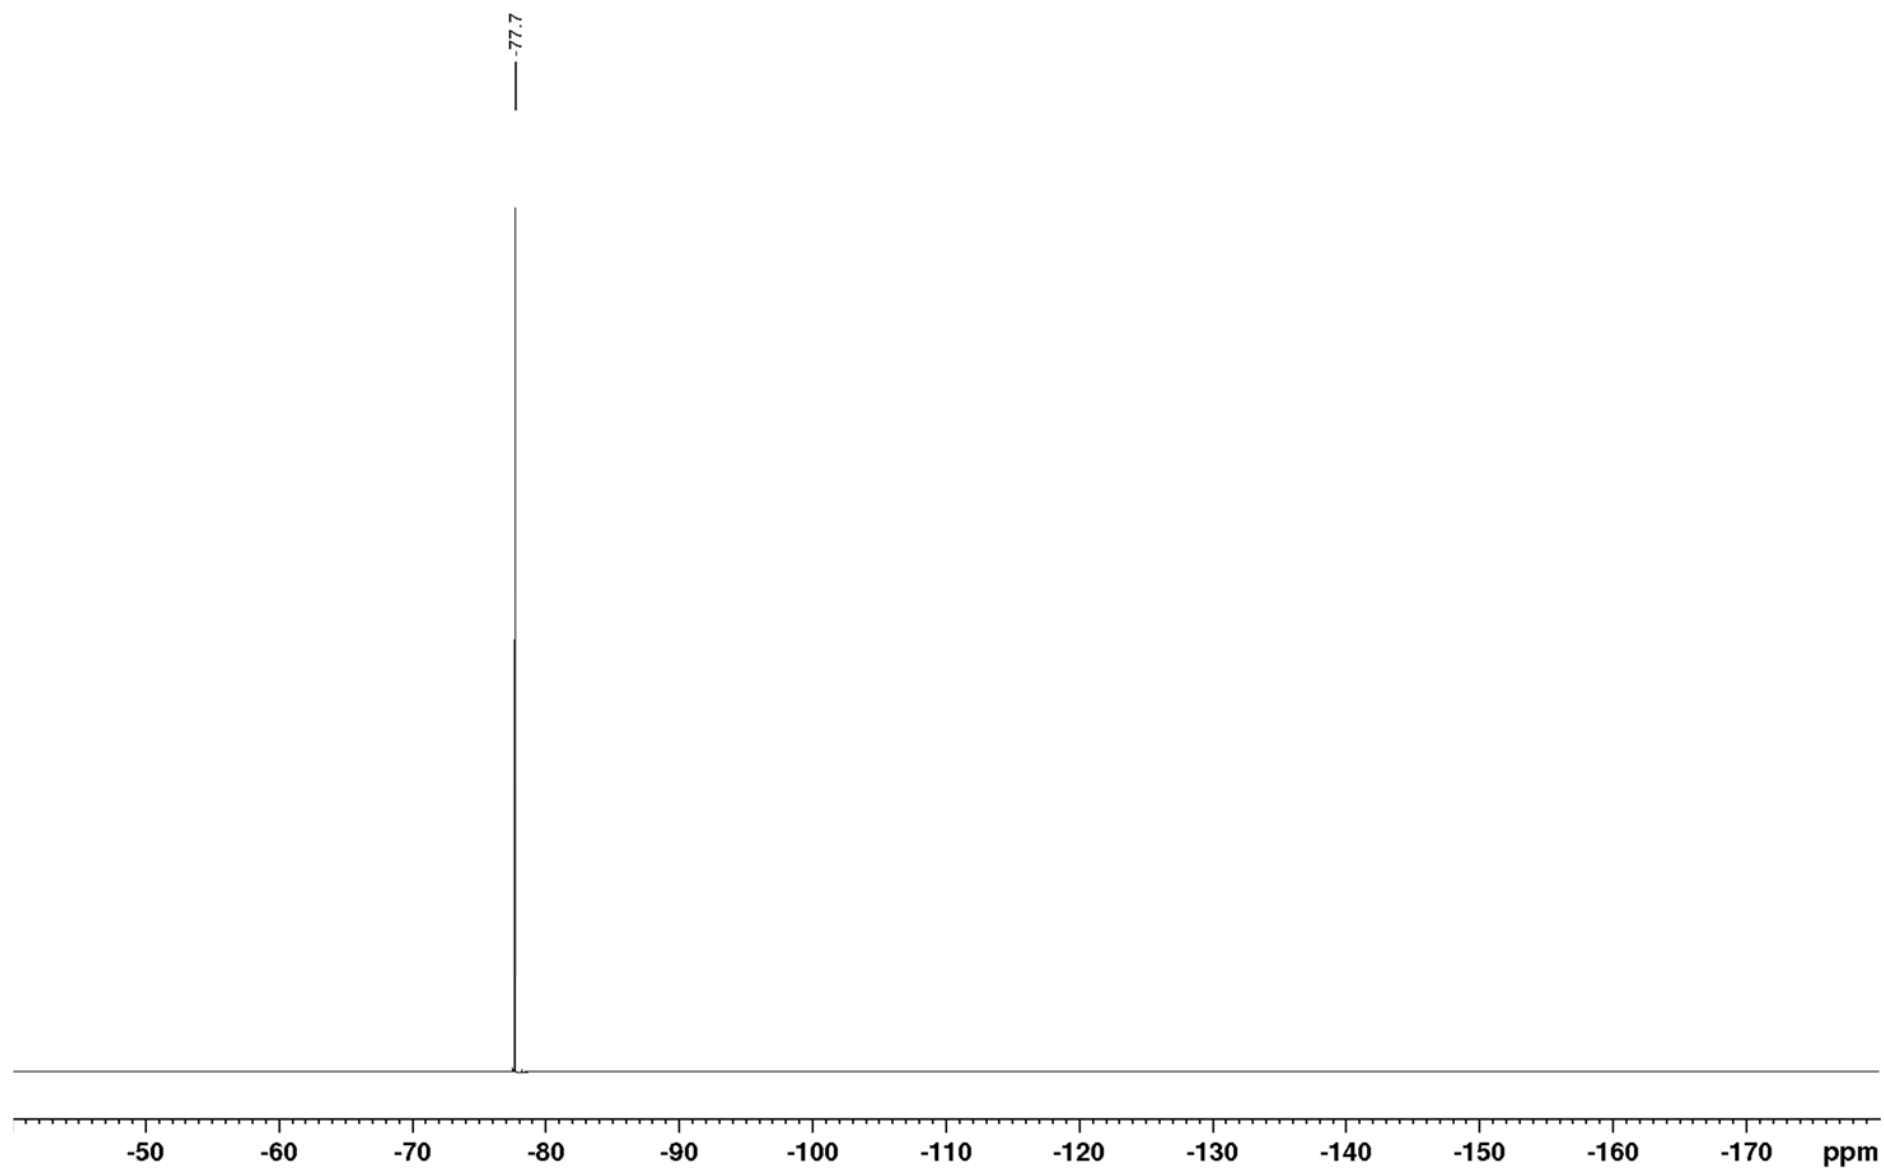

## SUPPORTING INFORMATION

***N,N,N*-Trimethyl-1-(naphthalen-2-yl)ethan-1-aminium trifluoromethanesulfonate (1m).**<sup>1</sup>H NMR (400 MHz,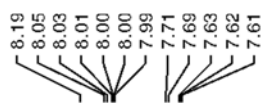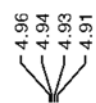

3.04

1.83  
1.82DMSO-*d*<sub>6</sub>: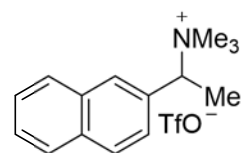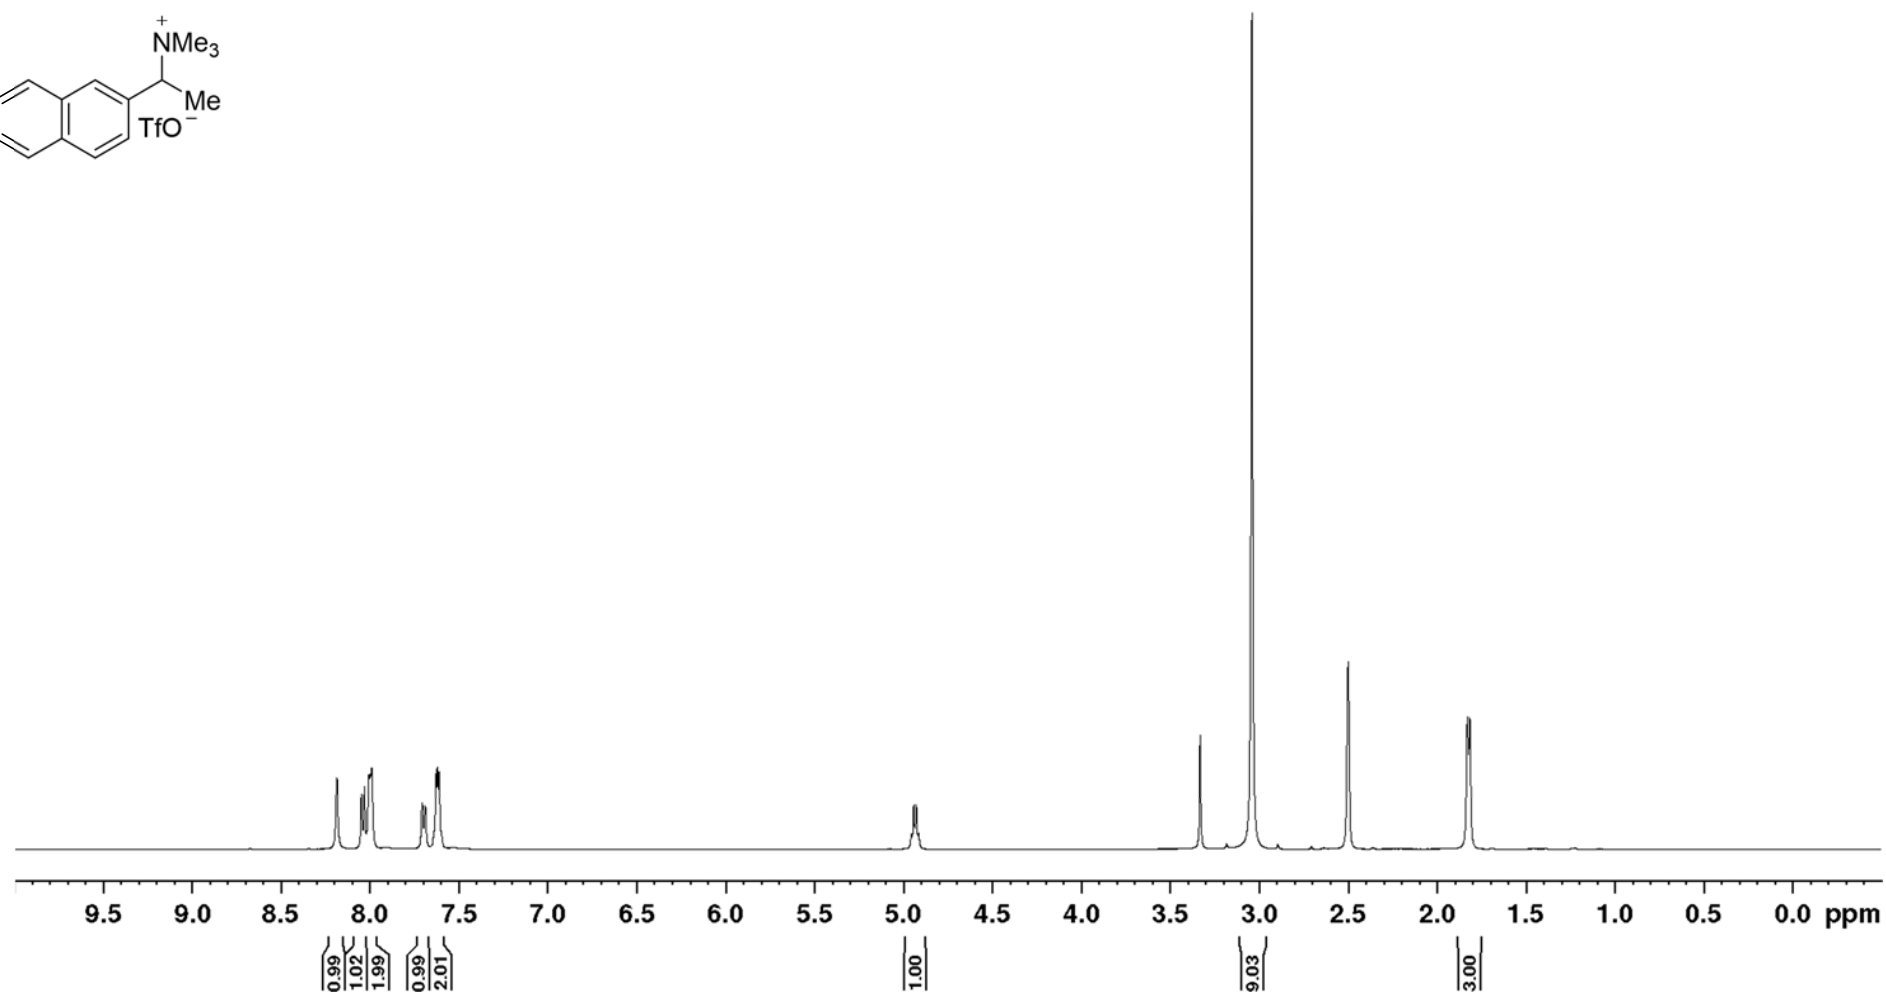

## SUPPORTING INFORMATION

 $^{13}\text{C}\{^1\text{H}\}$  NMR (101 MHz,  $\text{DMSO-}d_6$ ):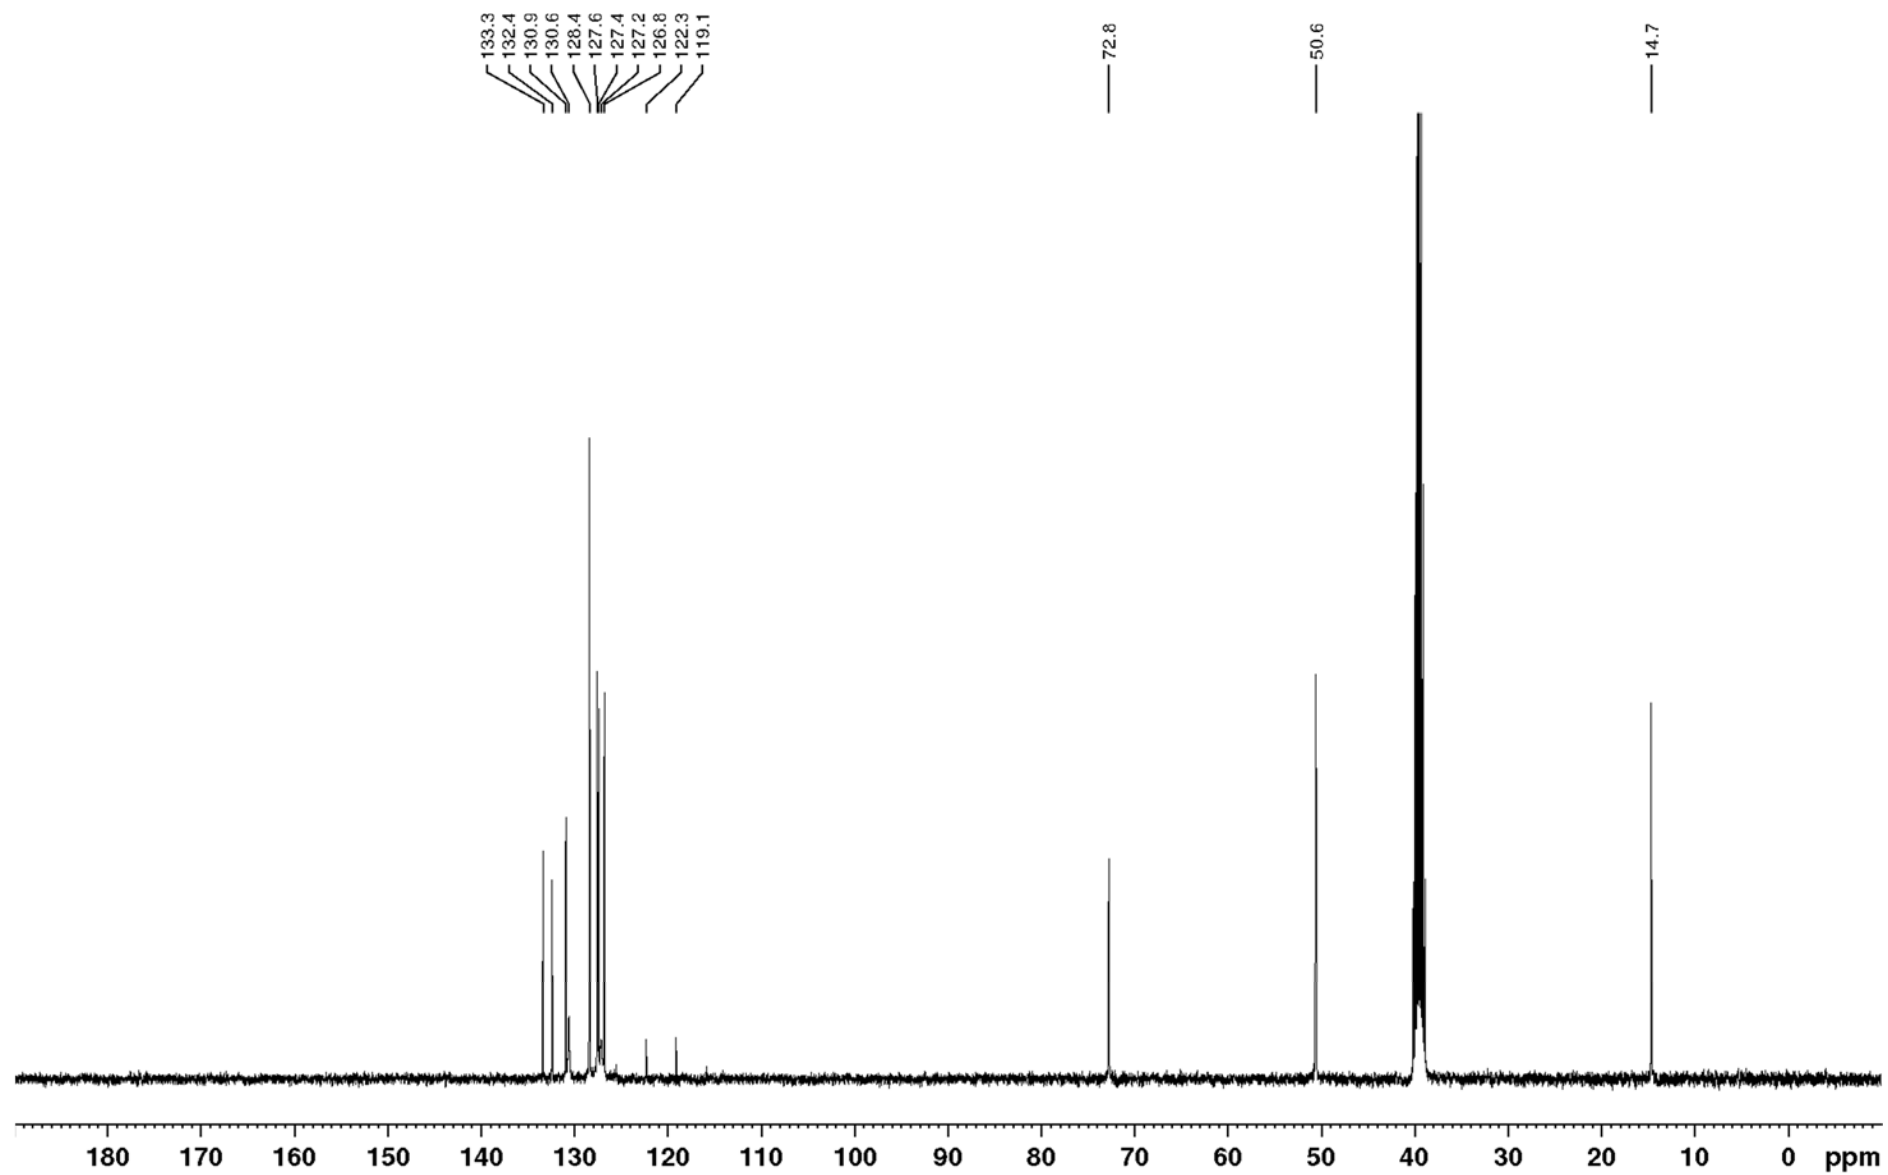

## SUPPORTING INFORMATION

 $^{13}\text{C}\{^{19}\text{F}\}$  DEPT NMR (126 MHz,  $\text{DMSO-}d_6$ ):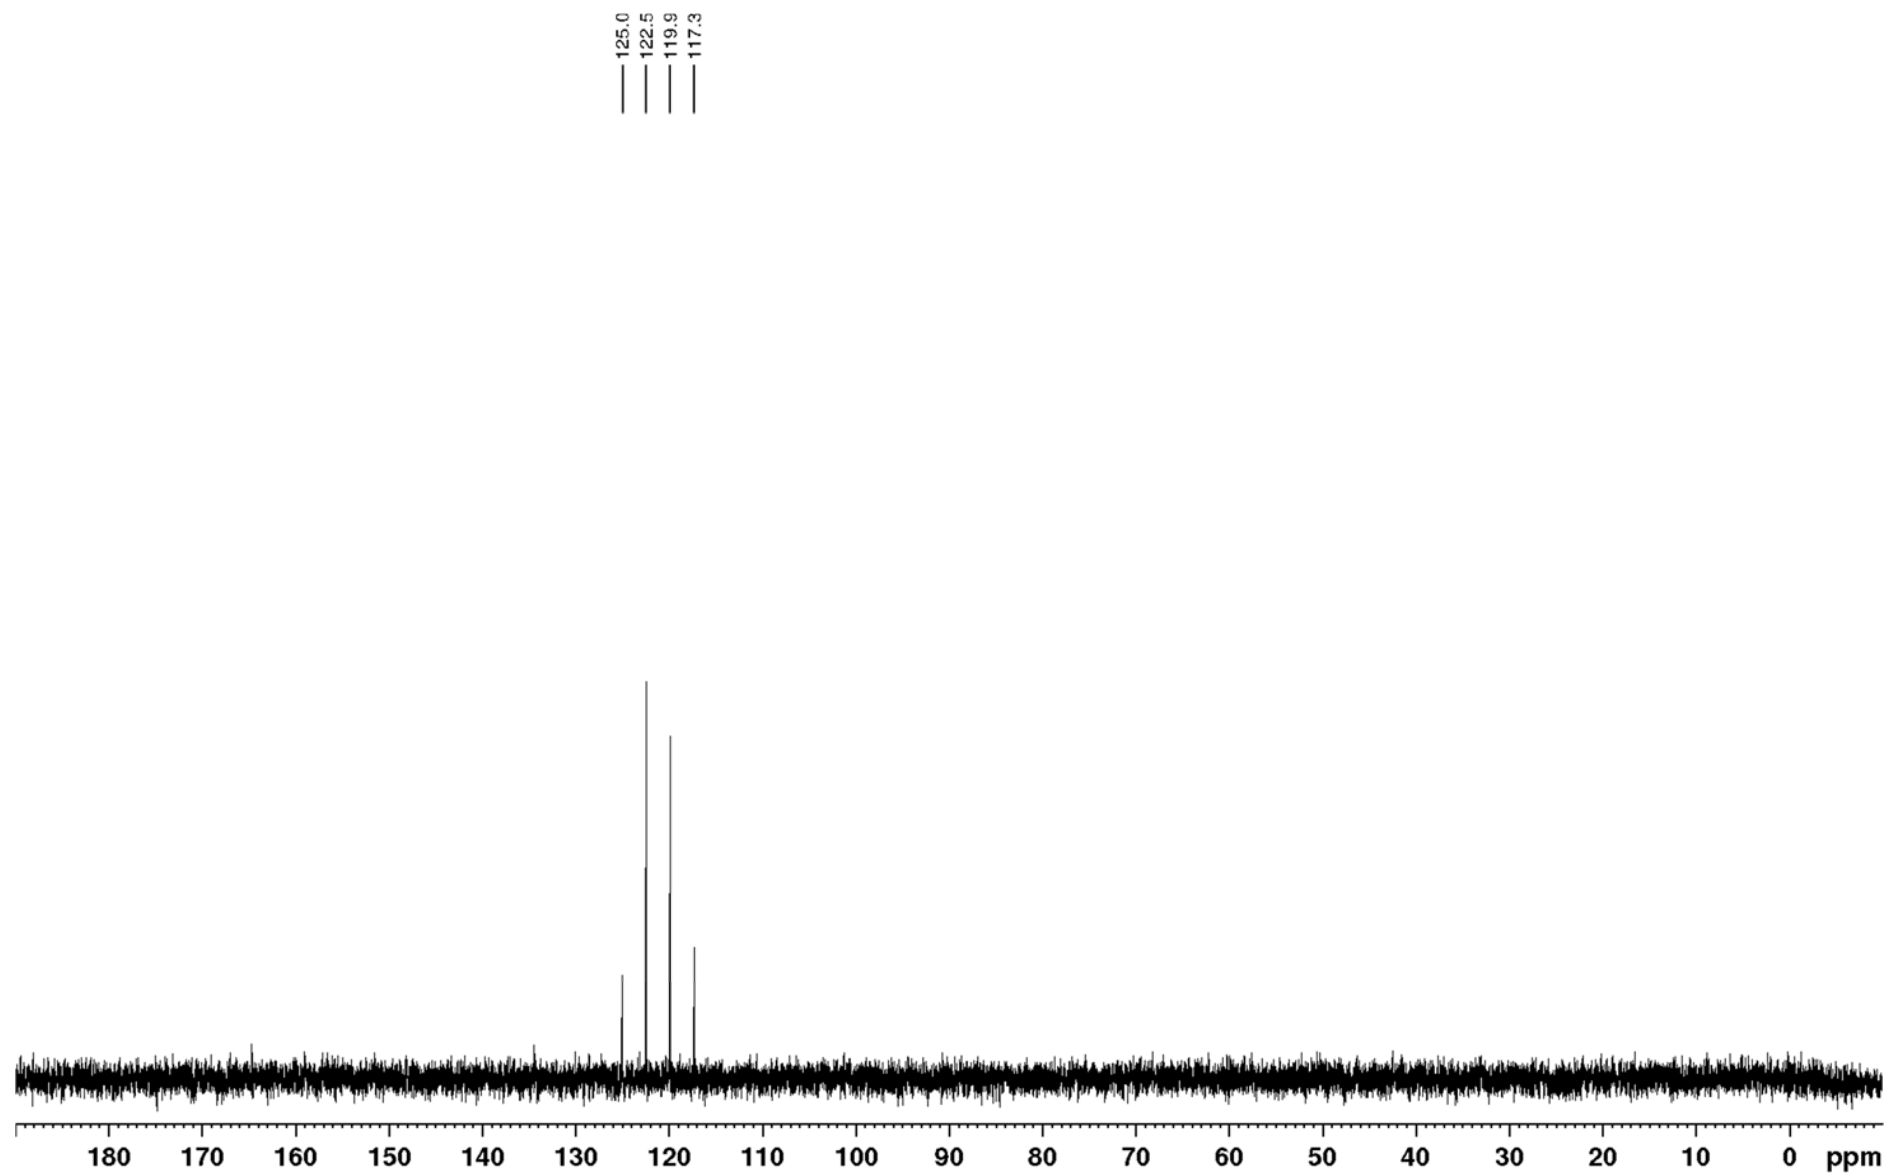

## SUPPORTING INFORMATION

 $^{19}\text{F}\{^1\text{H}\}$  NMR (471 MHz,  $\text{DMSO-}d_6$ ):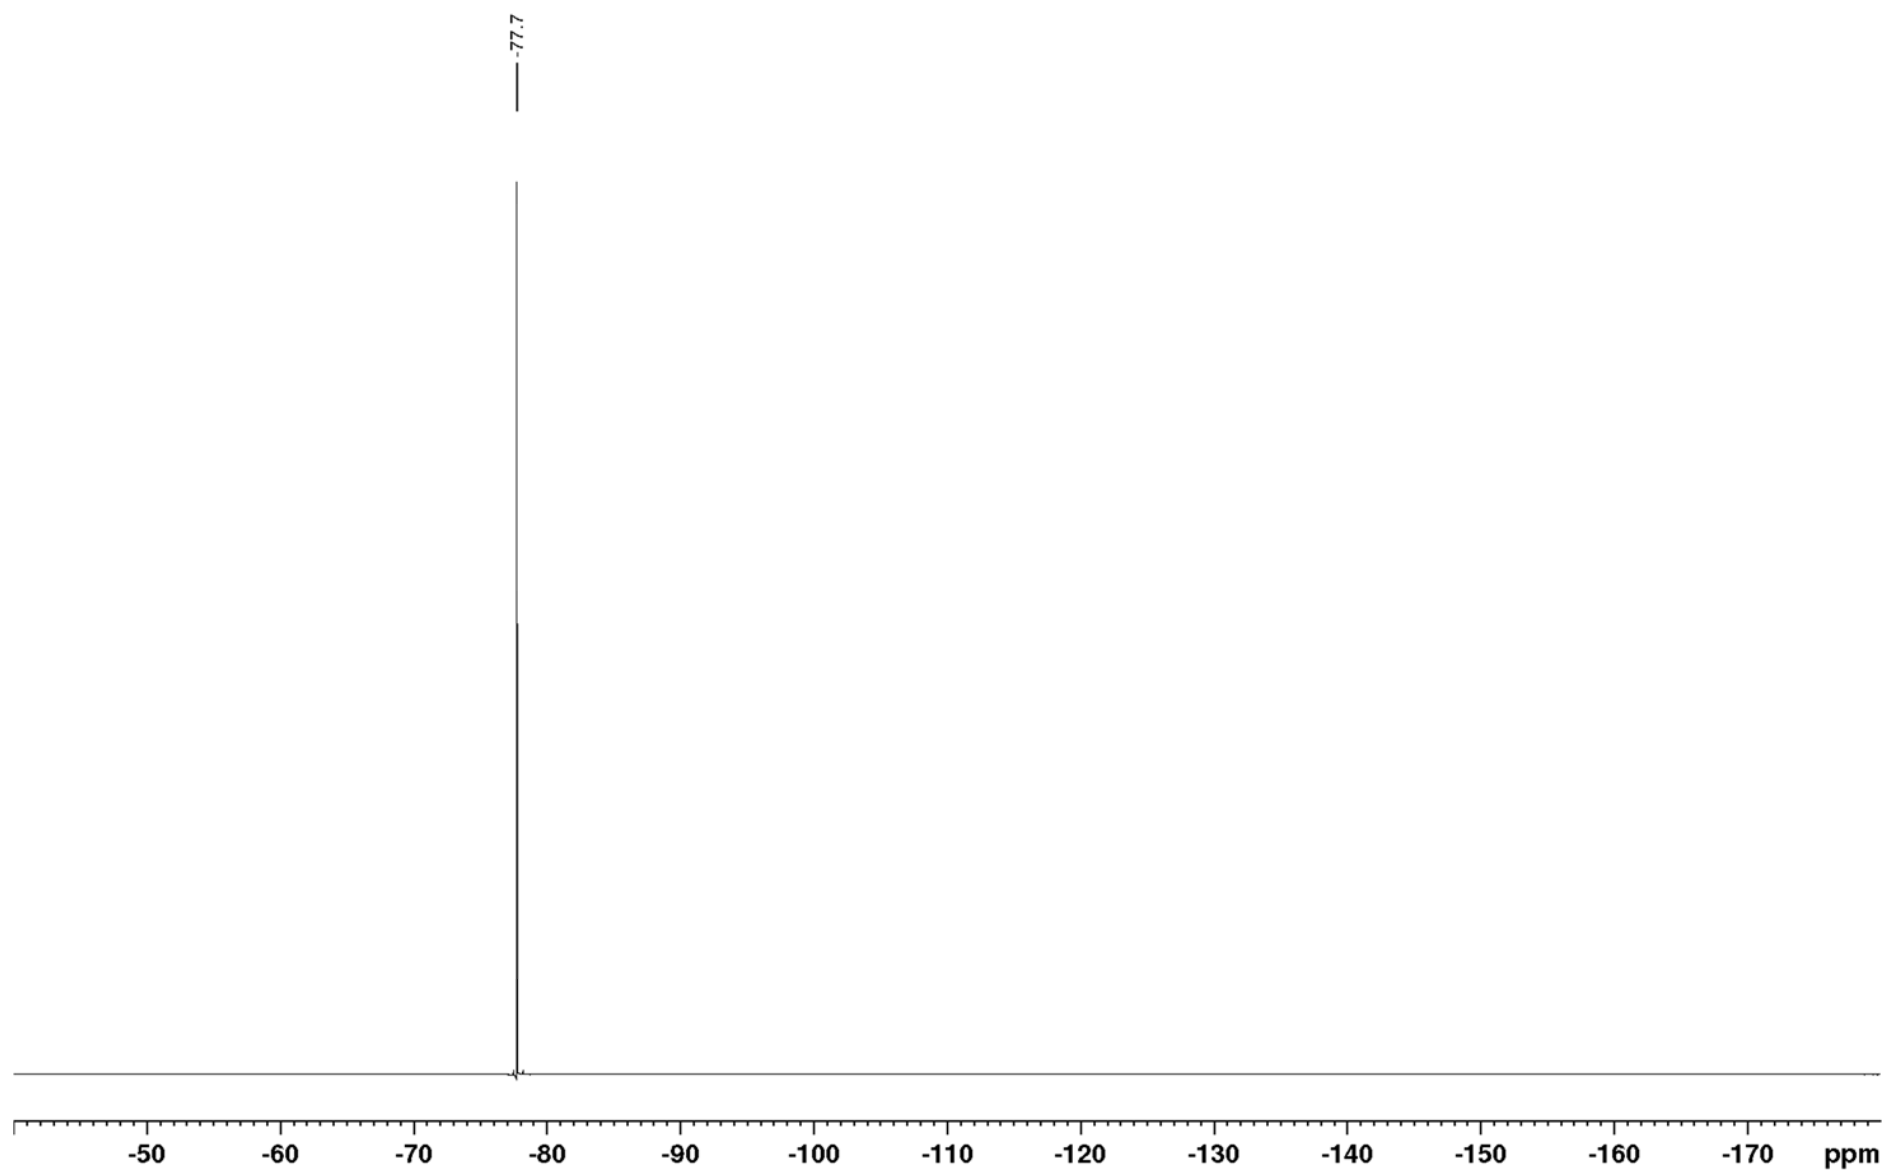

## SUPPORTING INFORMATION

**1-(Benzofuran-5-yl)-*N,N,N*-trimethylethan-1-aminium trifluoromethanesulfonate (1n).**<sup>1</sup>H NMR (500 MHz, DMSO-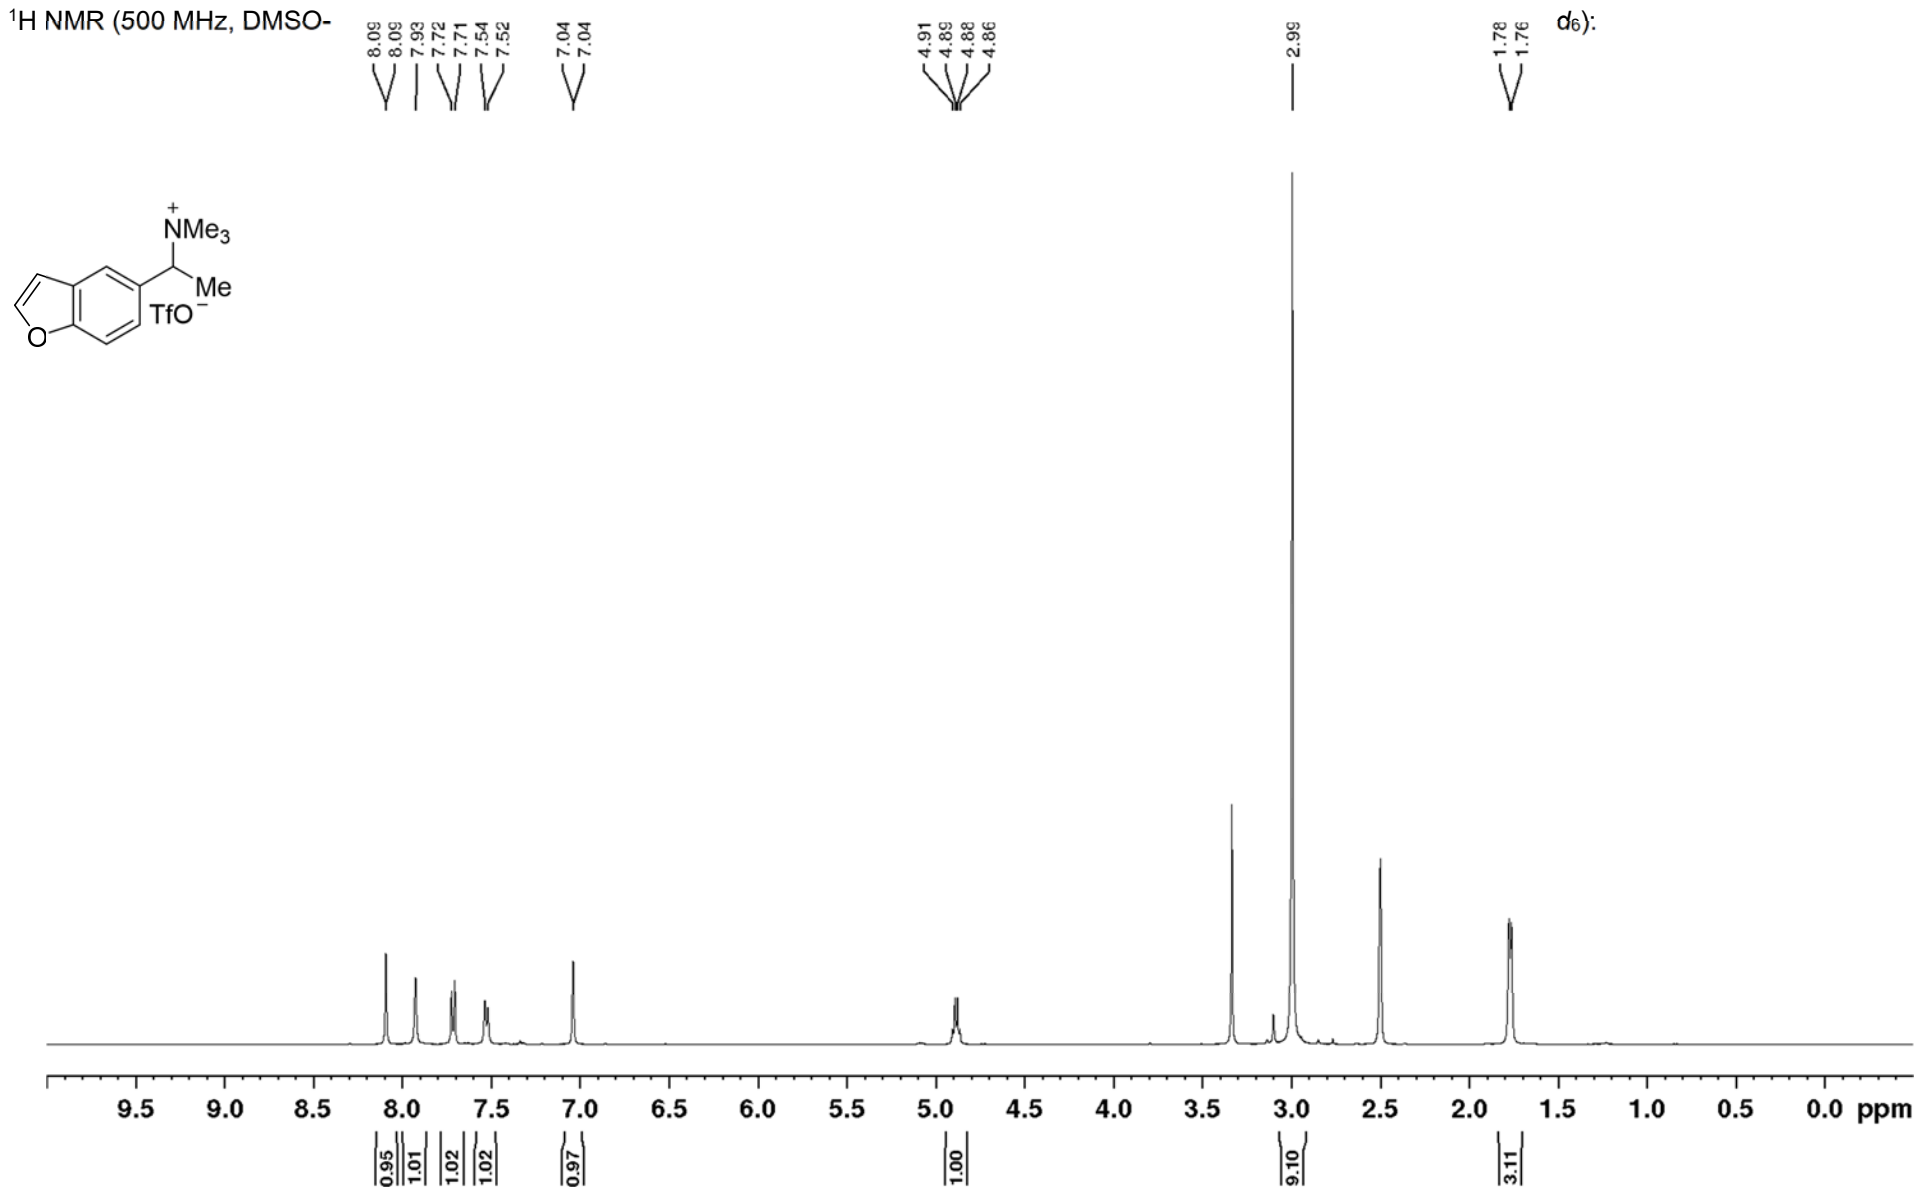

## SUPPORTING INFORMATION

 $^{13}\text{C}\{^1\text{H}\}$  NMR (126 MHz,  $\text{DMSO-}d_6$ ):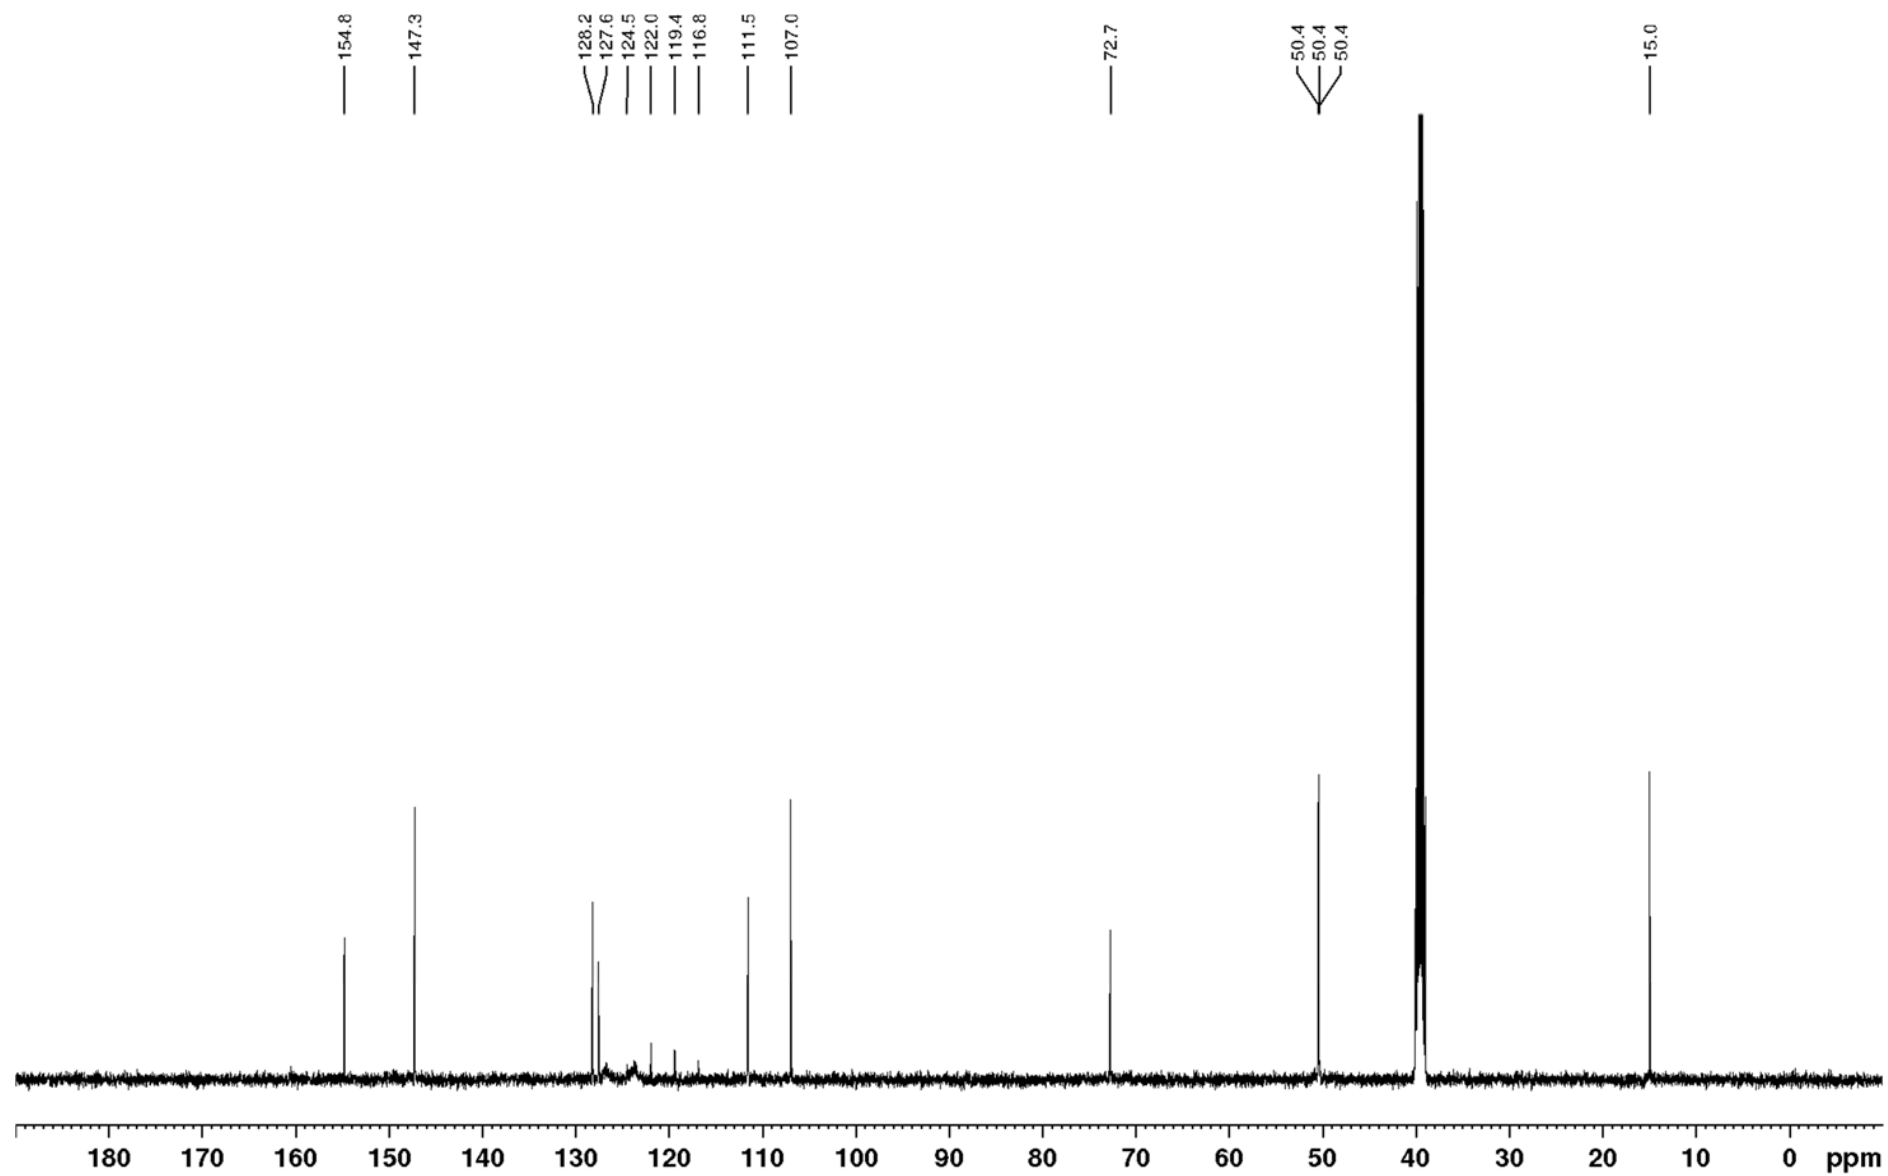



## SUPPORTING INFORMATION

 $^{13}\text{C}\{^{19}\text{F}\}$  DEPT NMR (126 MHz,  $\text{DMSO-}d_6$ ):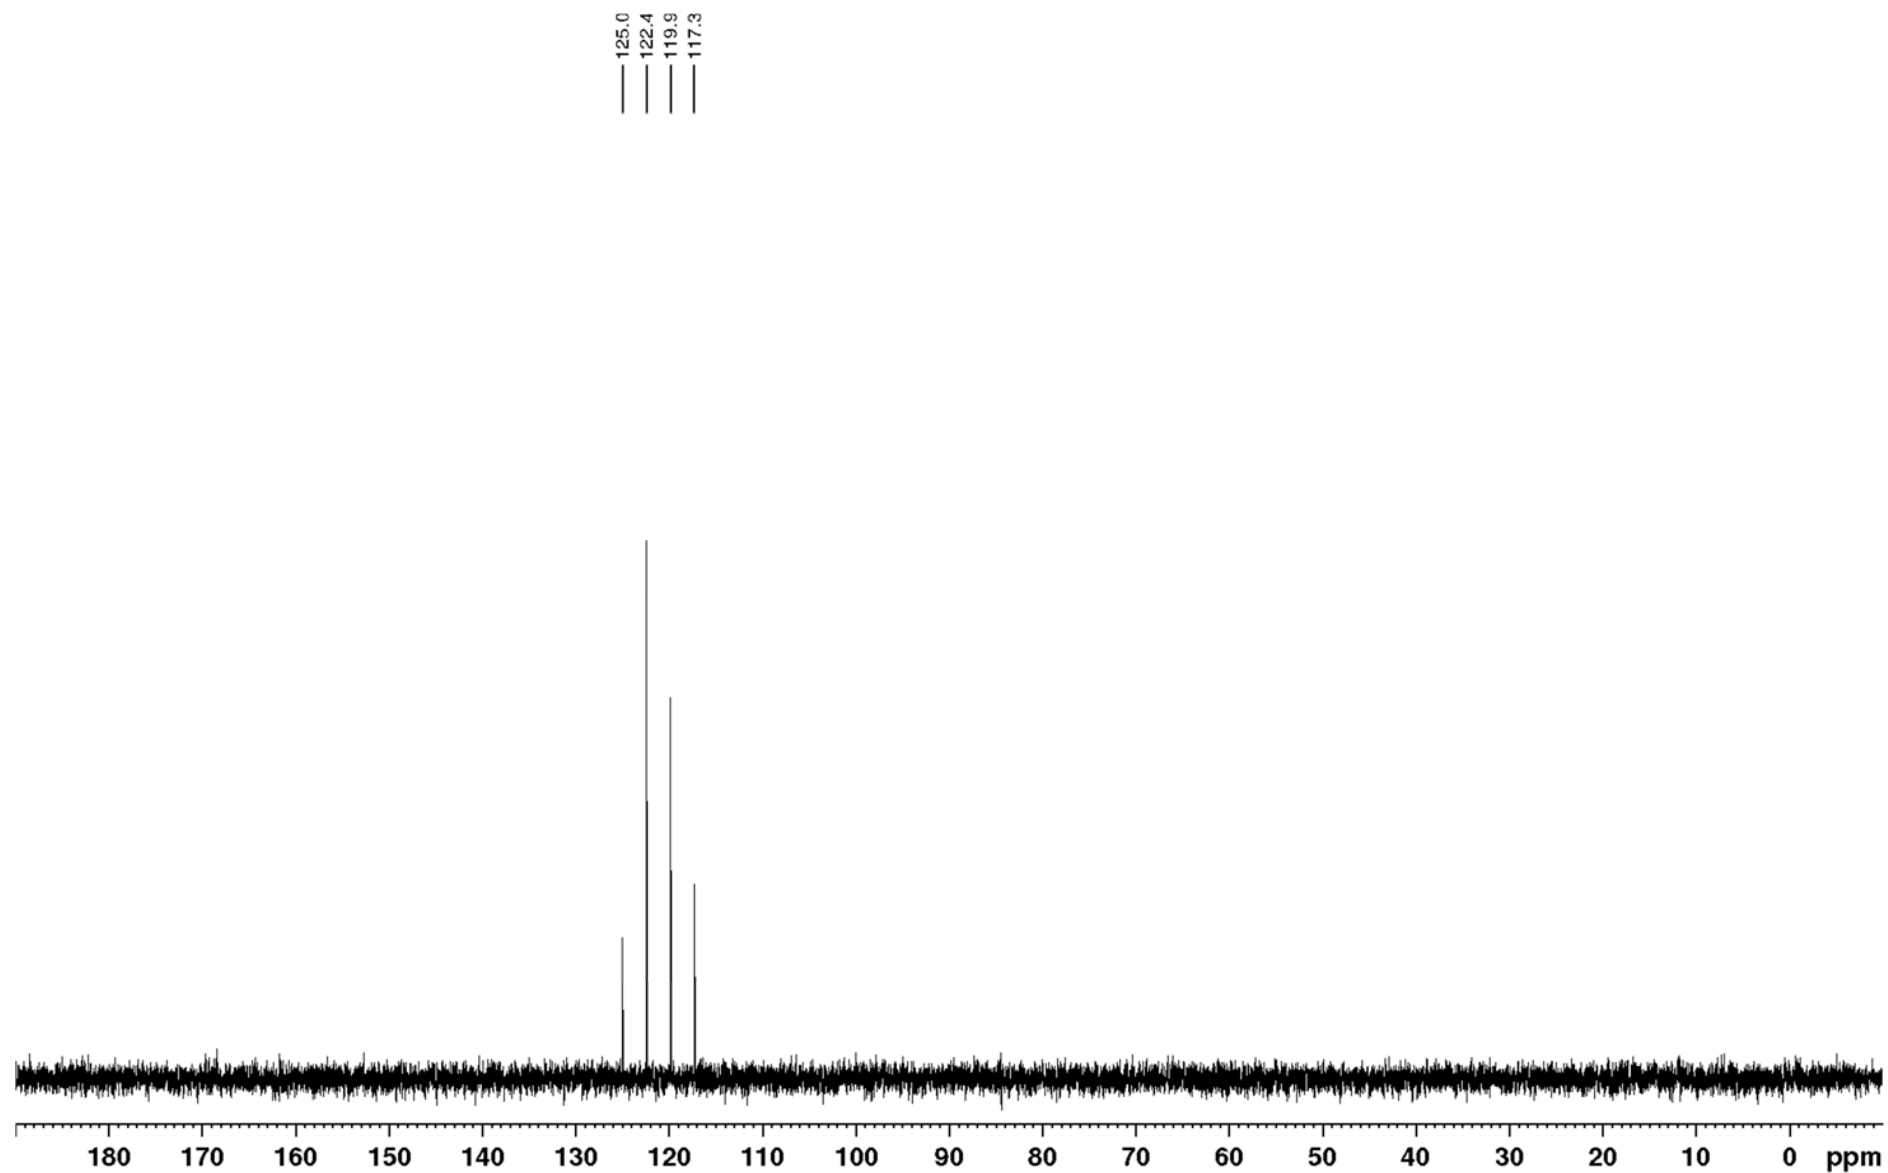

## SUPPORTING INFORMATION

 $^{19}\text{F}\{^1\text{H}\}$  NMR (471 MHz,  $\text{DMSO-}d_6$ ):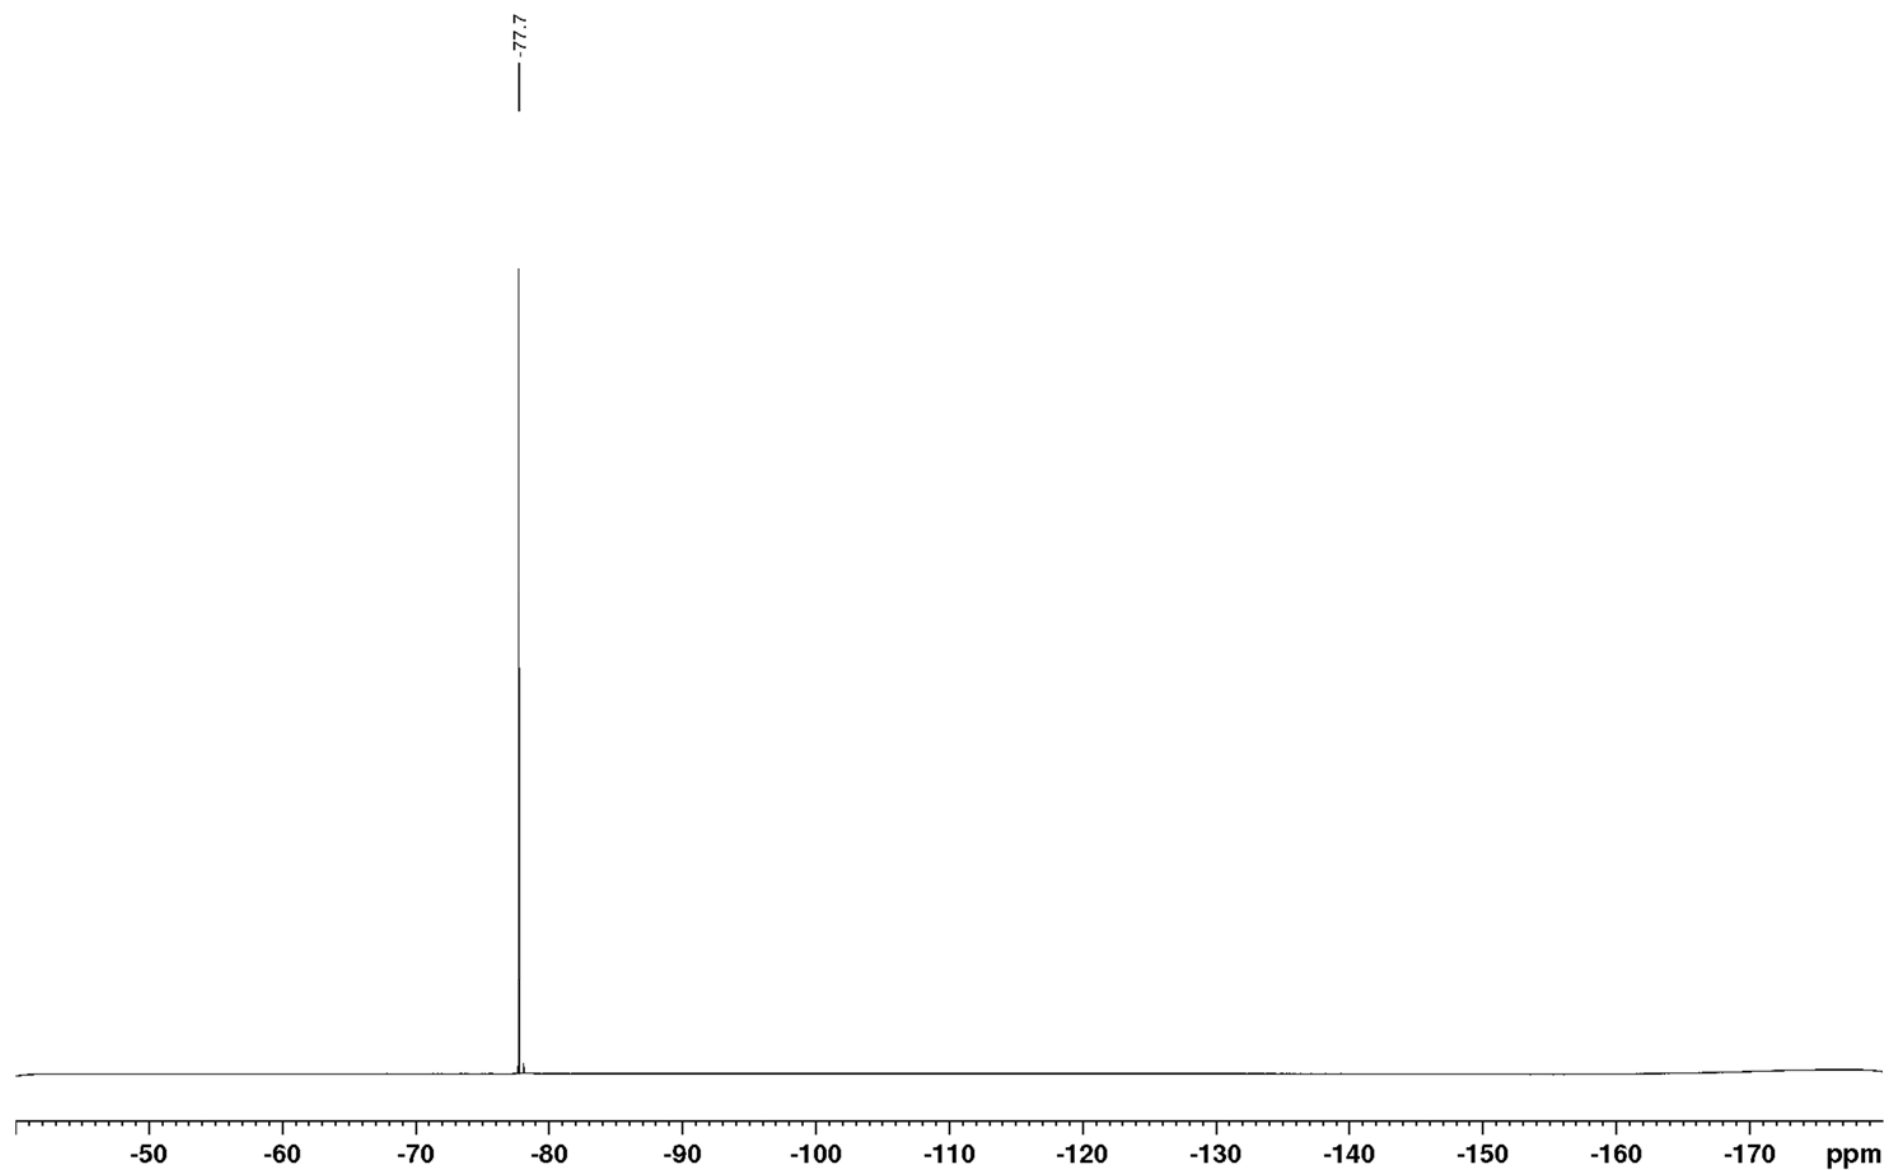

## SUPPORTING INFORMATION

***N,N,N*-Trimethyl-1-(thiophen-2-yl)ethan-1-aminium trifluoromethanesulfonate (1o).**<sup>1</sup>H NMR (500 MHz, DMSO-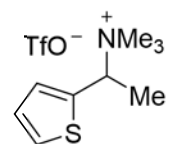

7.79  
7.79  
7.78  
7.78  
7.46  
7.46  
7.46  
7.46  
7.19  
7.18  
7.17

5.14  
5.13  
5.11  
5.10

3.02

1.74  
1.73

d<sub>6</sub>):

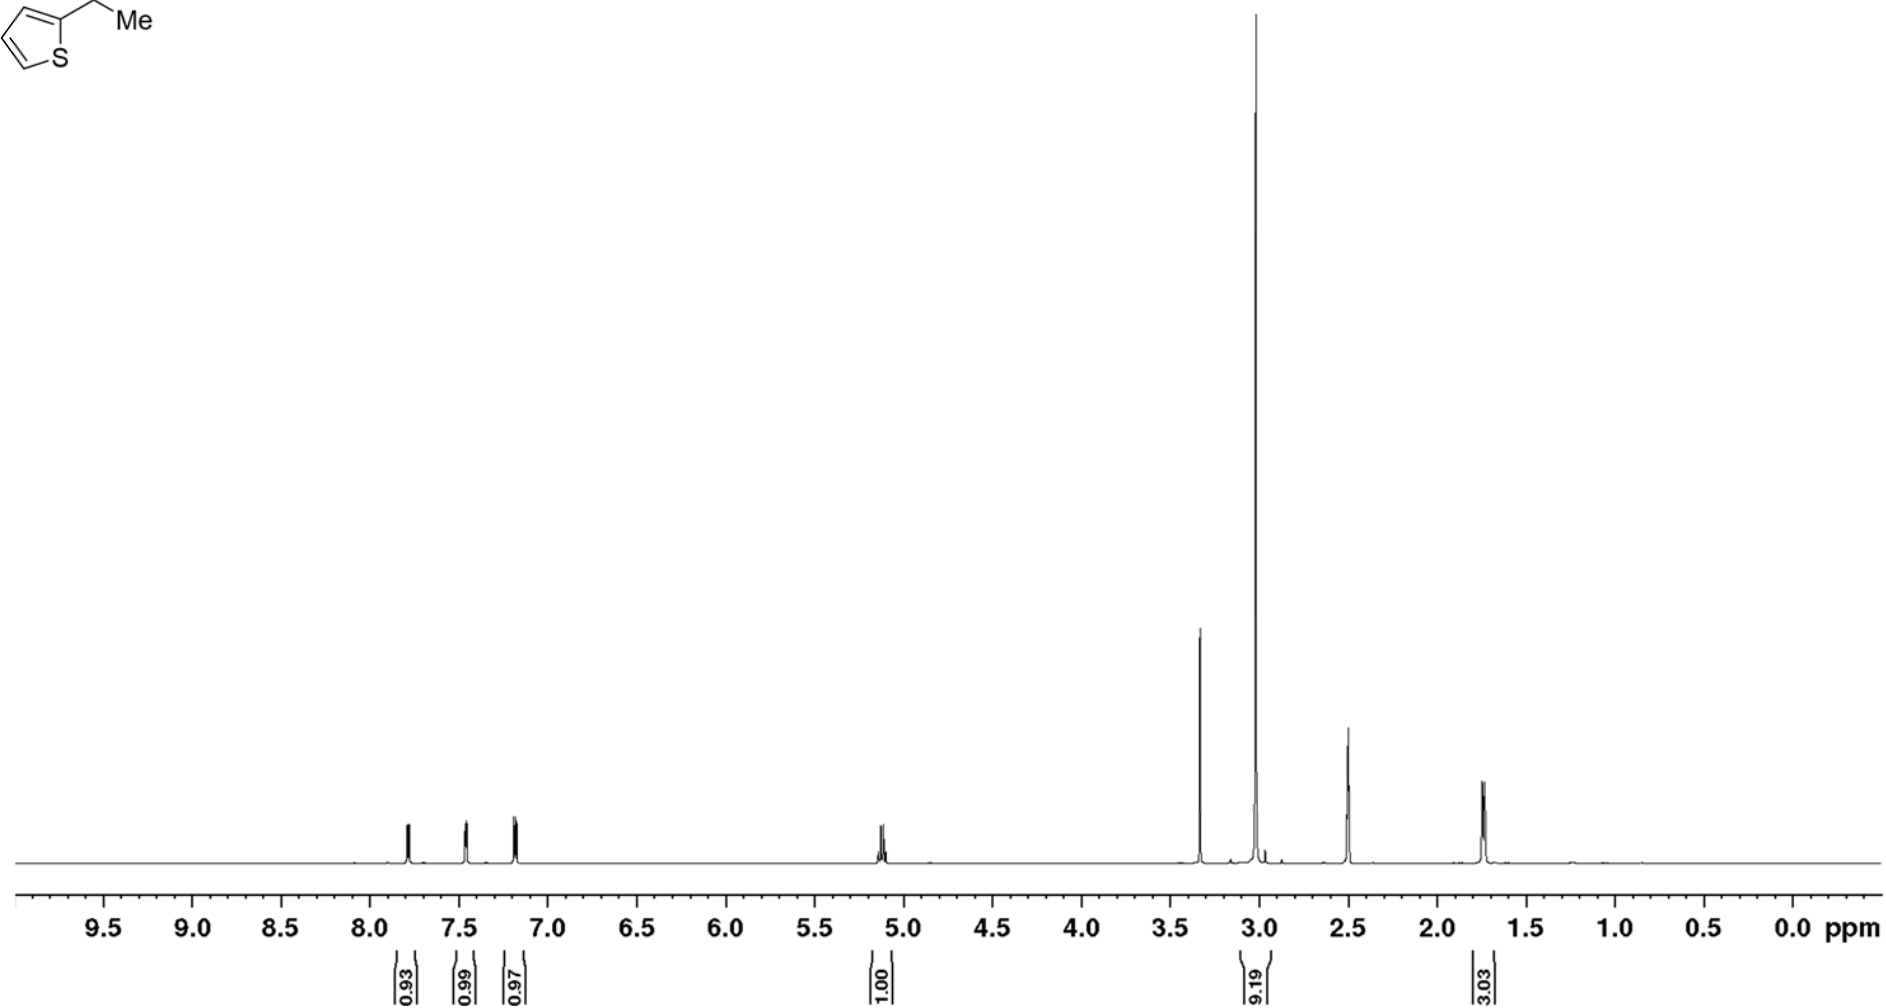

## SUPPORTING INFORMATION

 $^{13}\text{C}\{^1\text{H}\}$  NMR (126 MHz,  $\text{DMSO-}d_6$ ):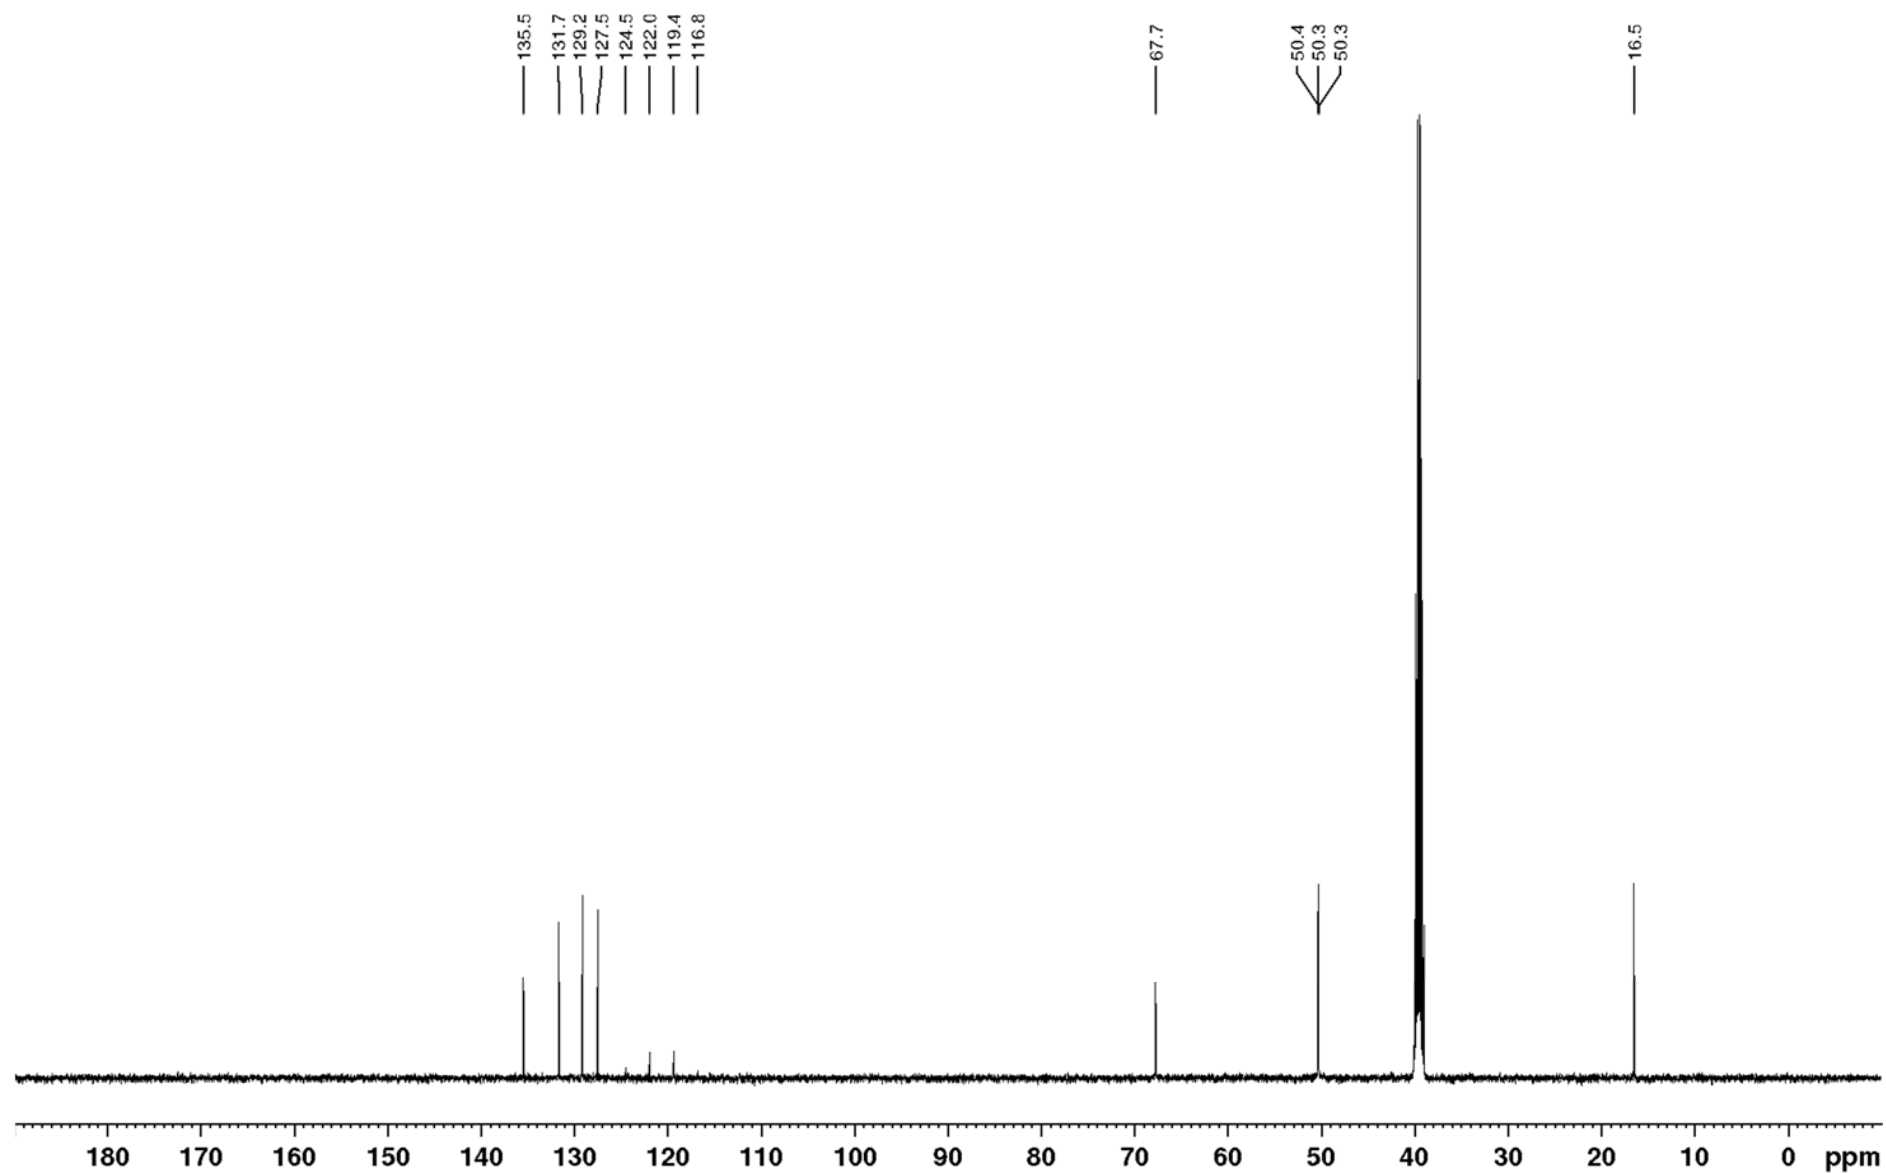

## SUPPORTING INFORMATION

 $^{13}\text{C}\{^{19}\text{F}\}$  DEPT NMR (176 MHz,  $\text{DMSO-}d_6$ ):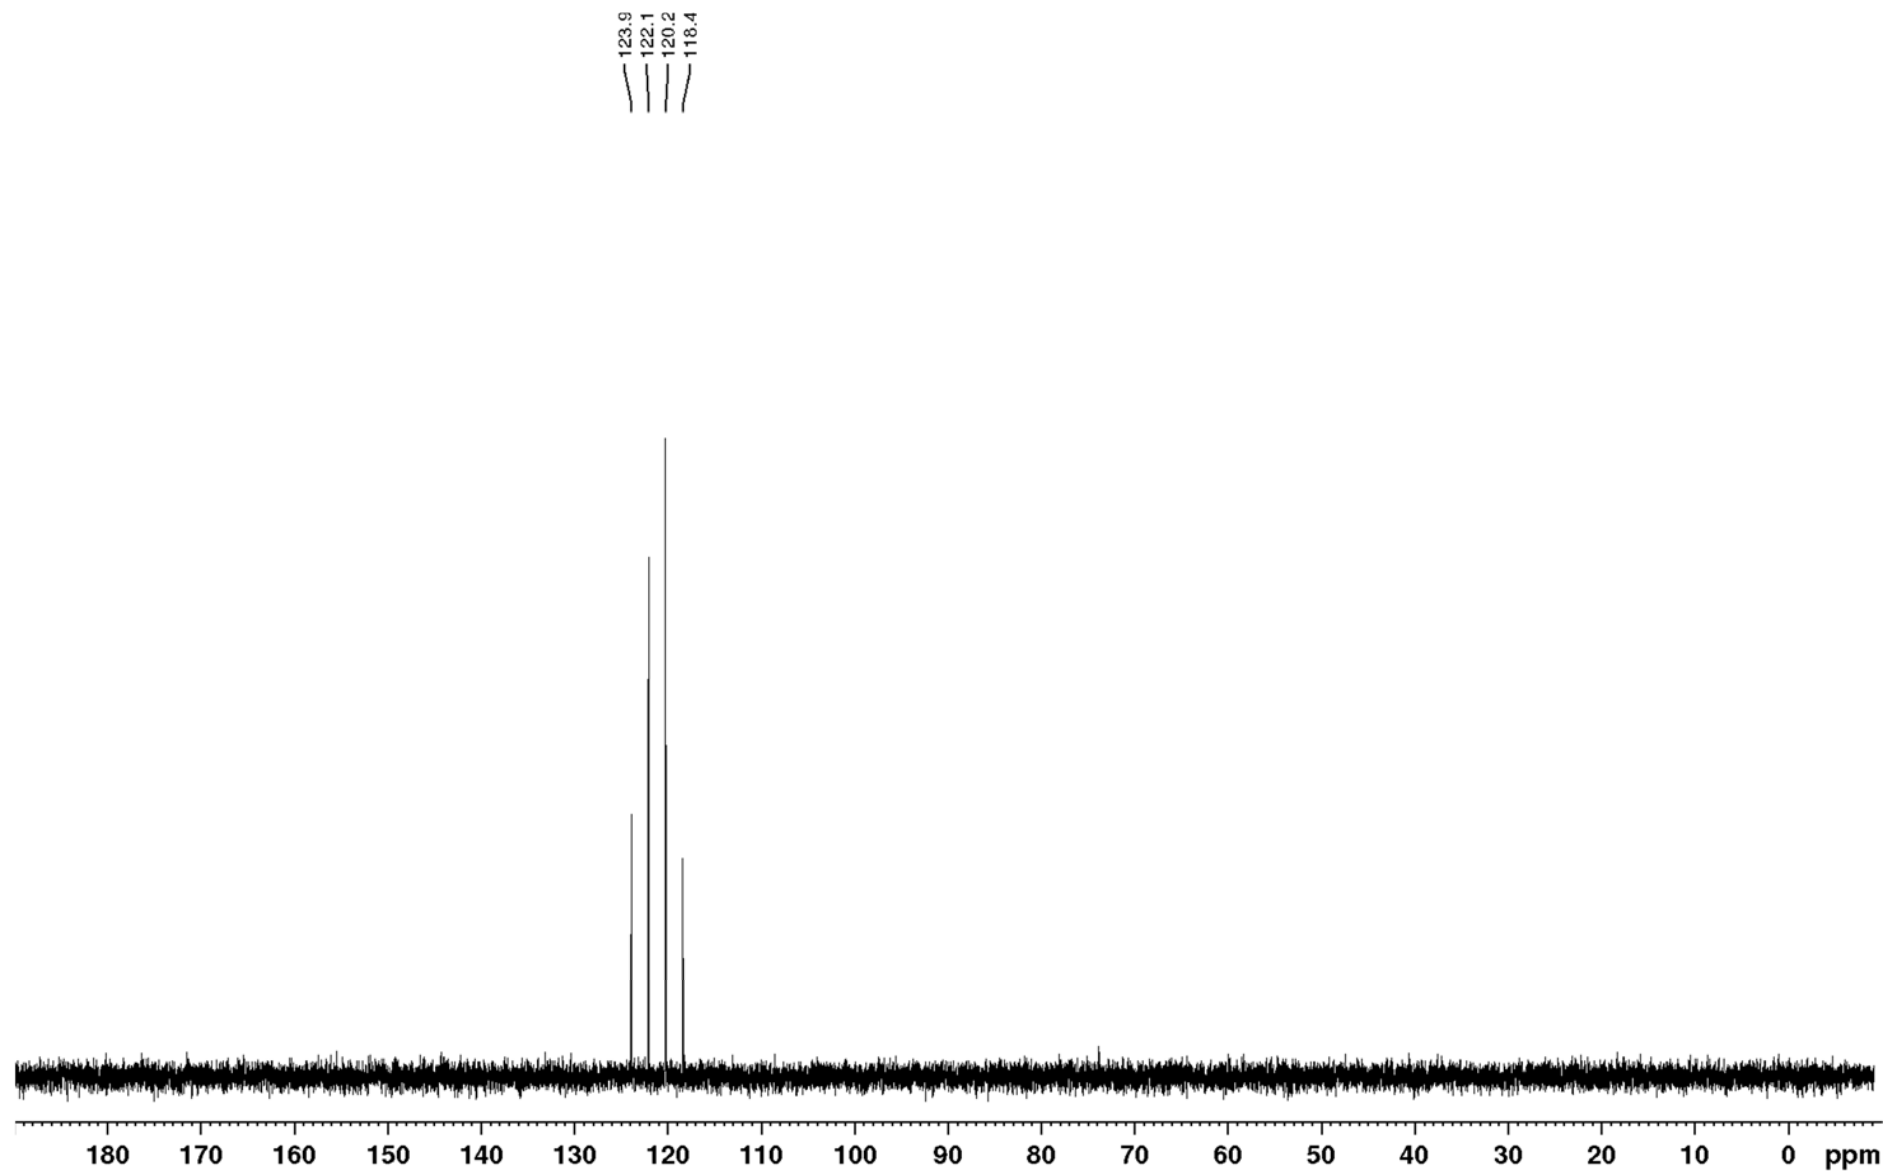

## SUPPORTING INFORMATION

 $^{19}\text{F}\{^1\text{H}\}$  NMR (659 MHz,  $\text{DMSO-}d_6$ ):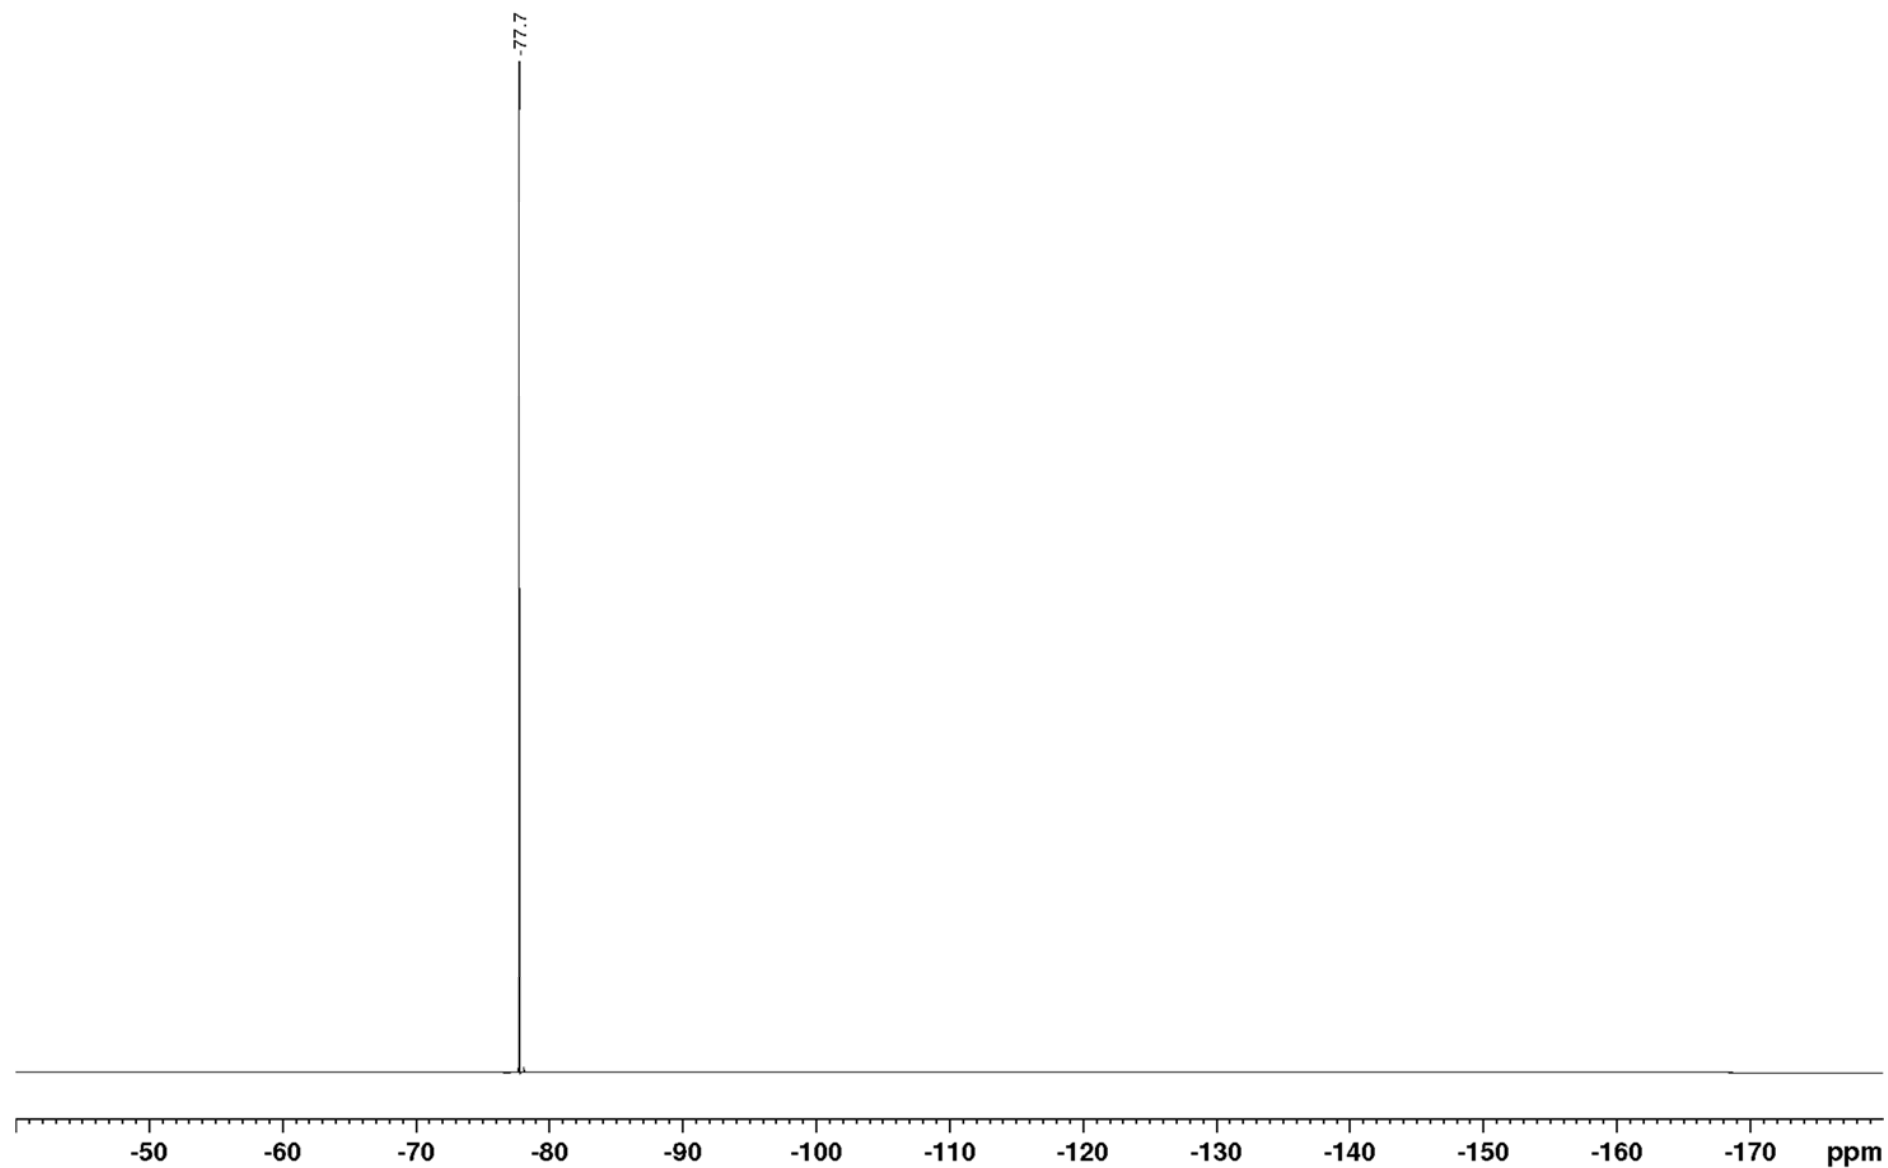

## SUPPORTING INFORMATION

***N,N,N*-Trimethyl-1-phenylpentan-1-aminium trifluoromethanesulfonate (1p).**

<sup>1</sup>H NMR (400 MHz, DMSO-

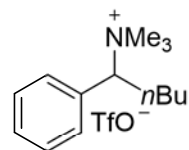

7.65  
7.60  
7.58  
7.57  
7.55  
7.52  
7.51  
7.50  
7.49  
7.48

4.54  
4.53  
4.52  
4.51

2.97  
2.21  
2.20  
2.19  
2.19  
2.18  
2.18  
2.17  
1.32  
1.31  
1.30  
1.30  
1.29  
1.29  
1.28  
1.27  
1.26  
1.25  
1.24  
1.23  
1.21  
0.99  
0.98  
0.96  
0.80  
0.79  
0.77

d<sub>6</sub>):

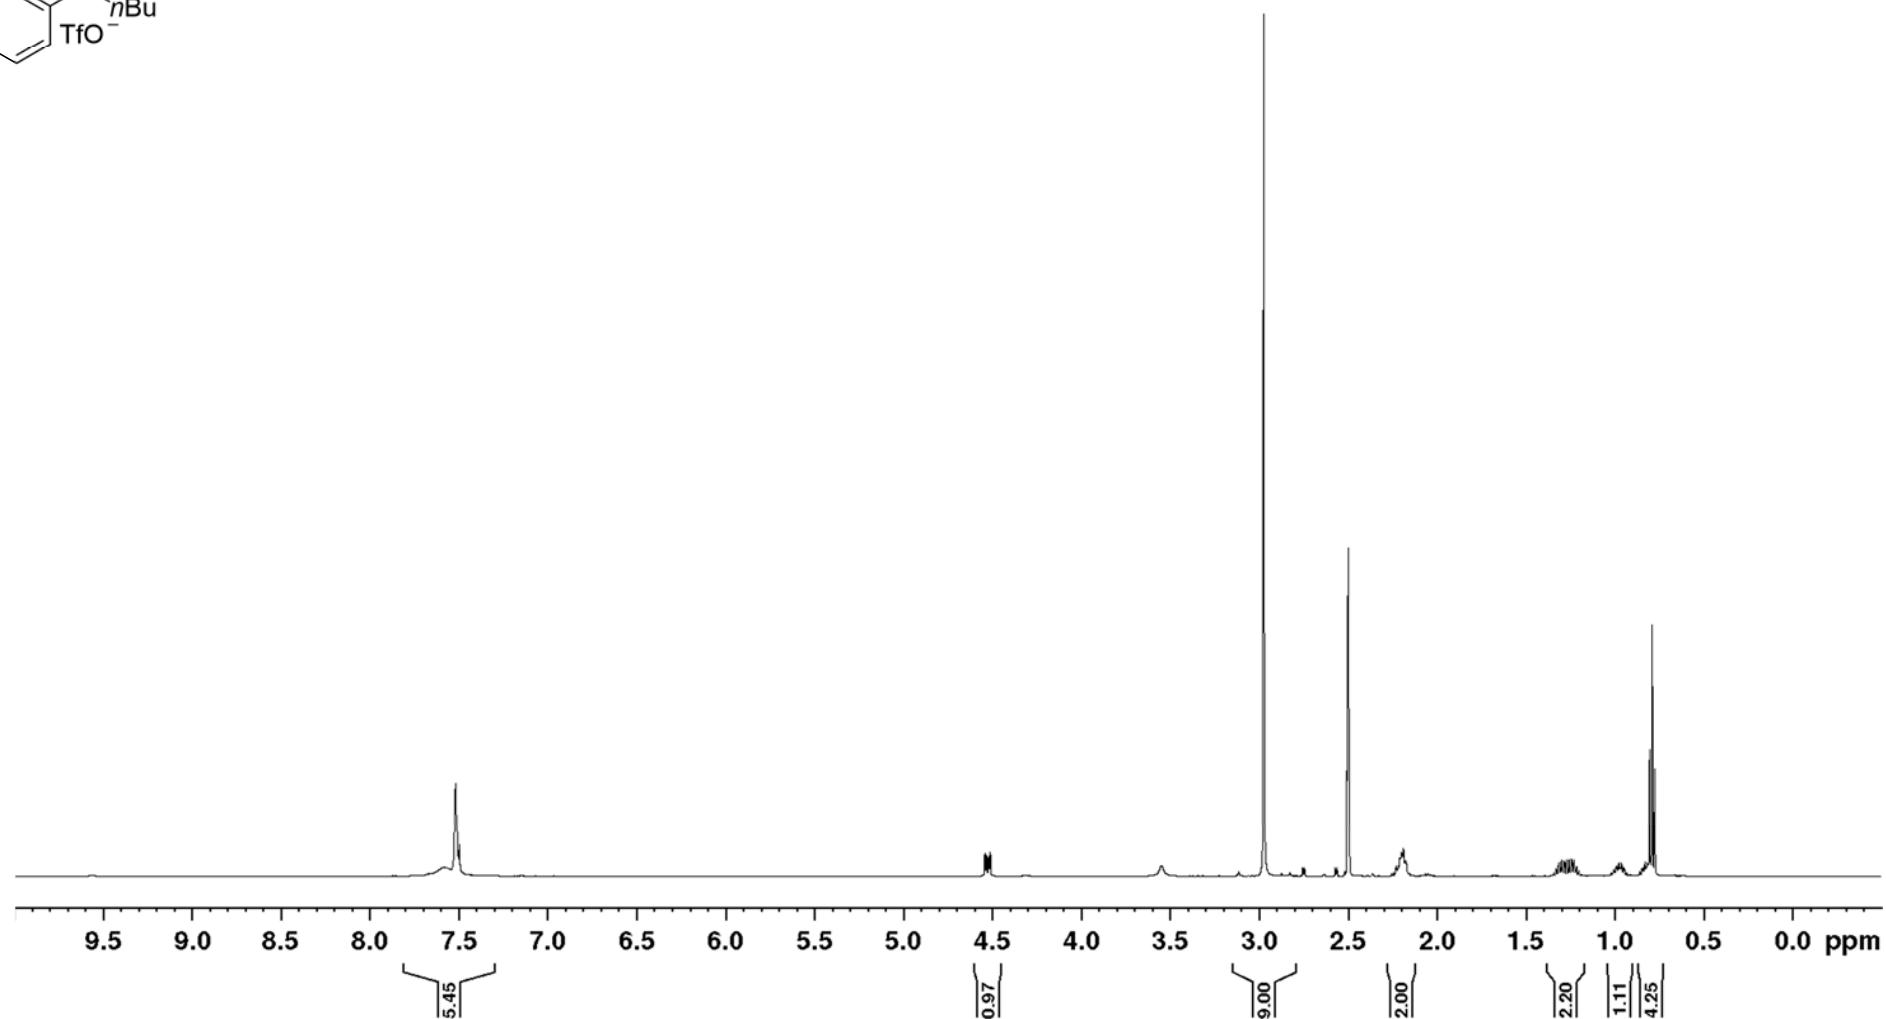

## SUPPORTING INFORMATION

 $^{13}\text{C}\{^1\text{H}\}$  NMR (101 MHz,  $\text{DMSO-}d_6$ ):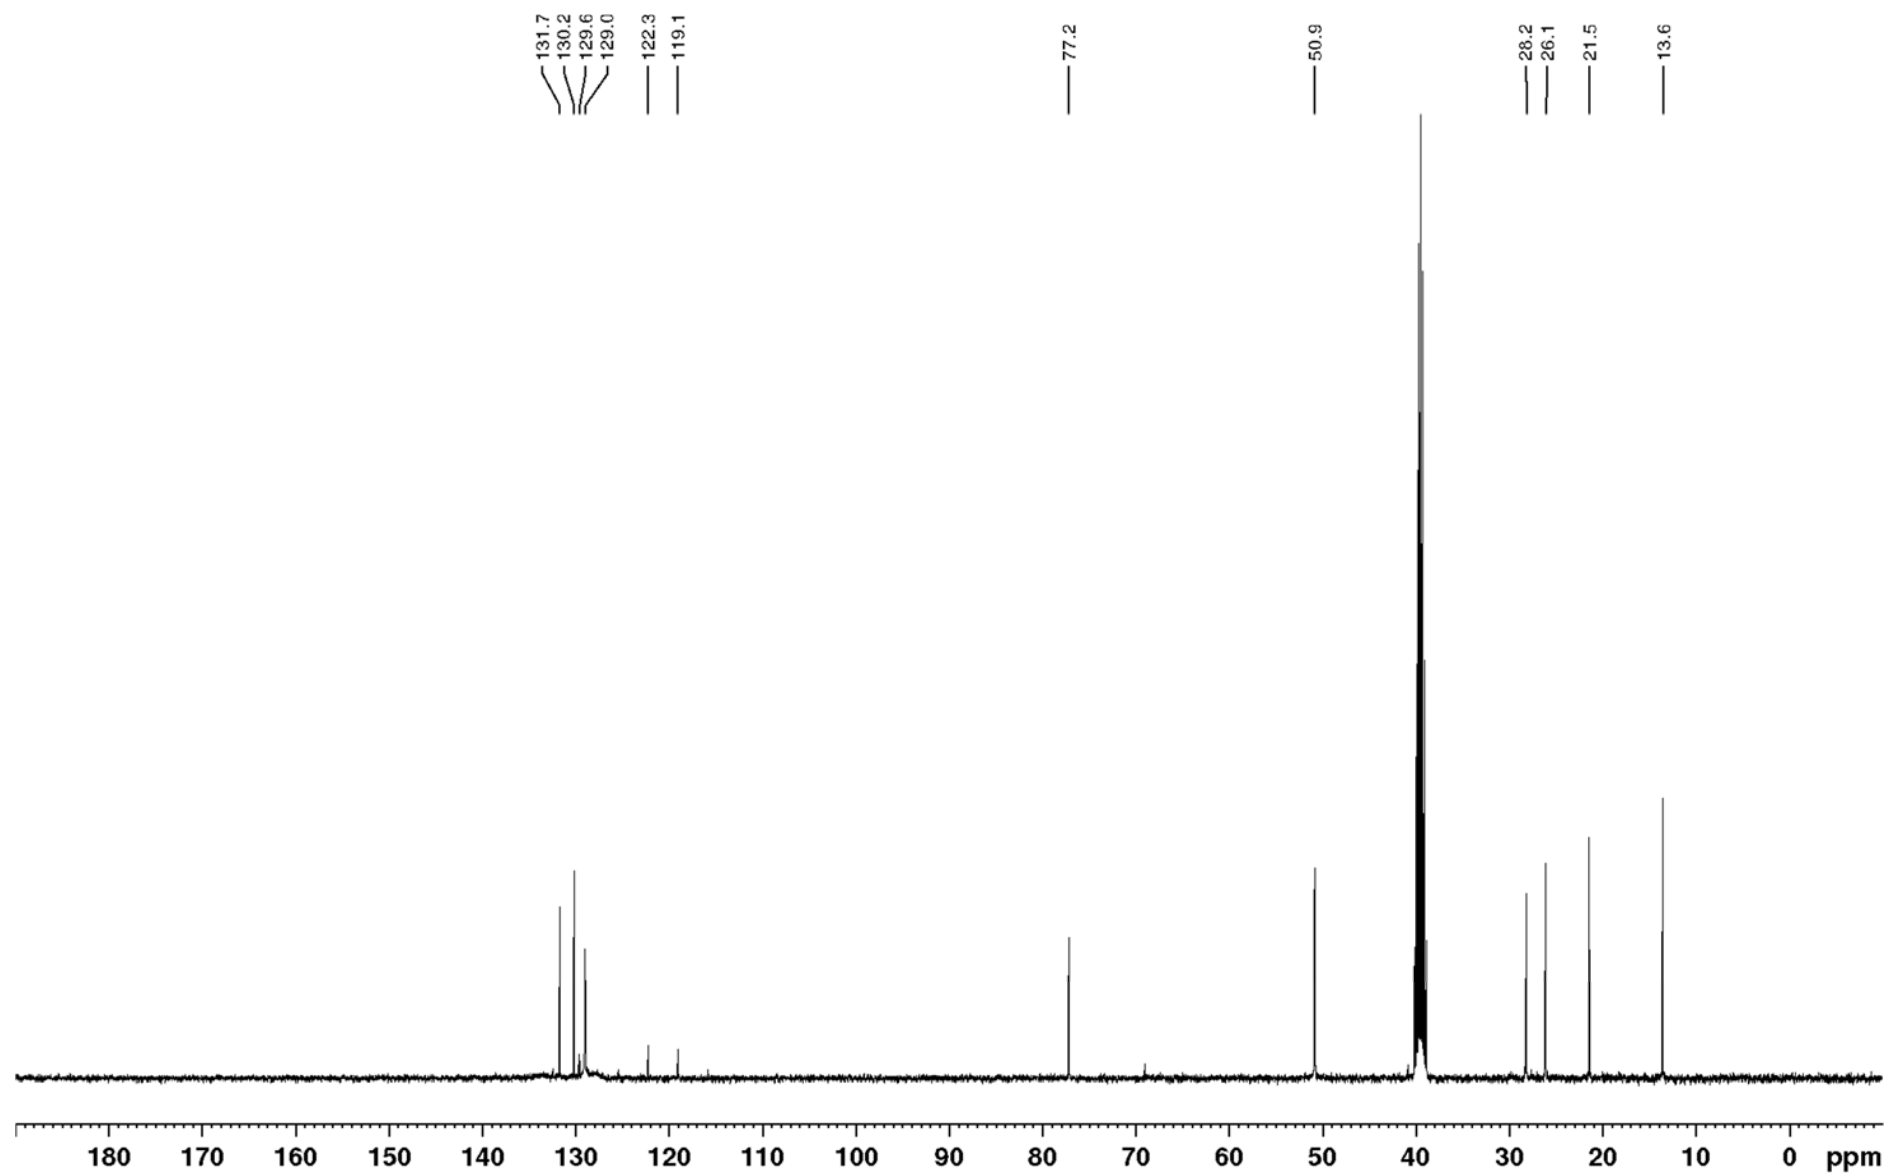



## SUPPORTING INFORMATION

 $^{13}\text{C}\{^{19}\text{F}\}$  DEPT NMR (126 MHz,  $\text{DMSO-}d_6$ ):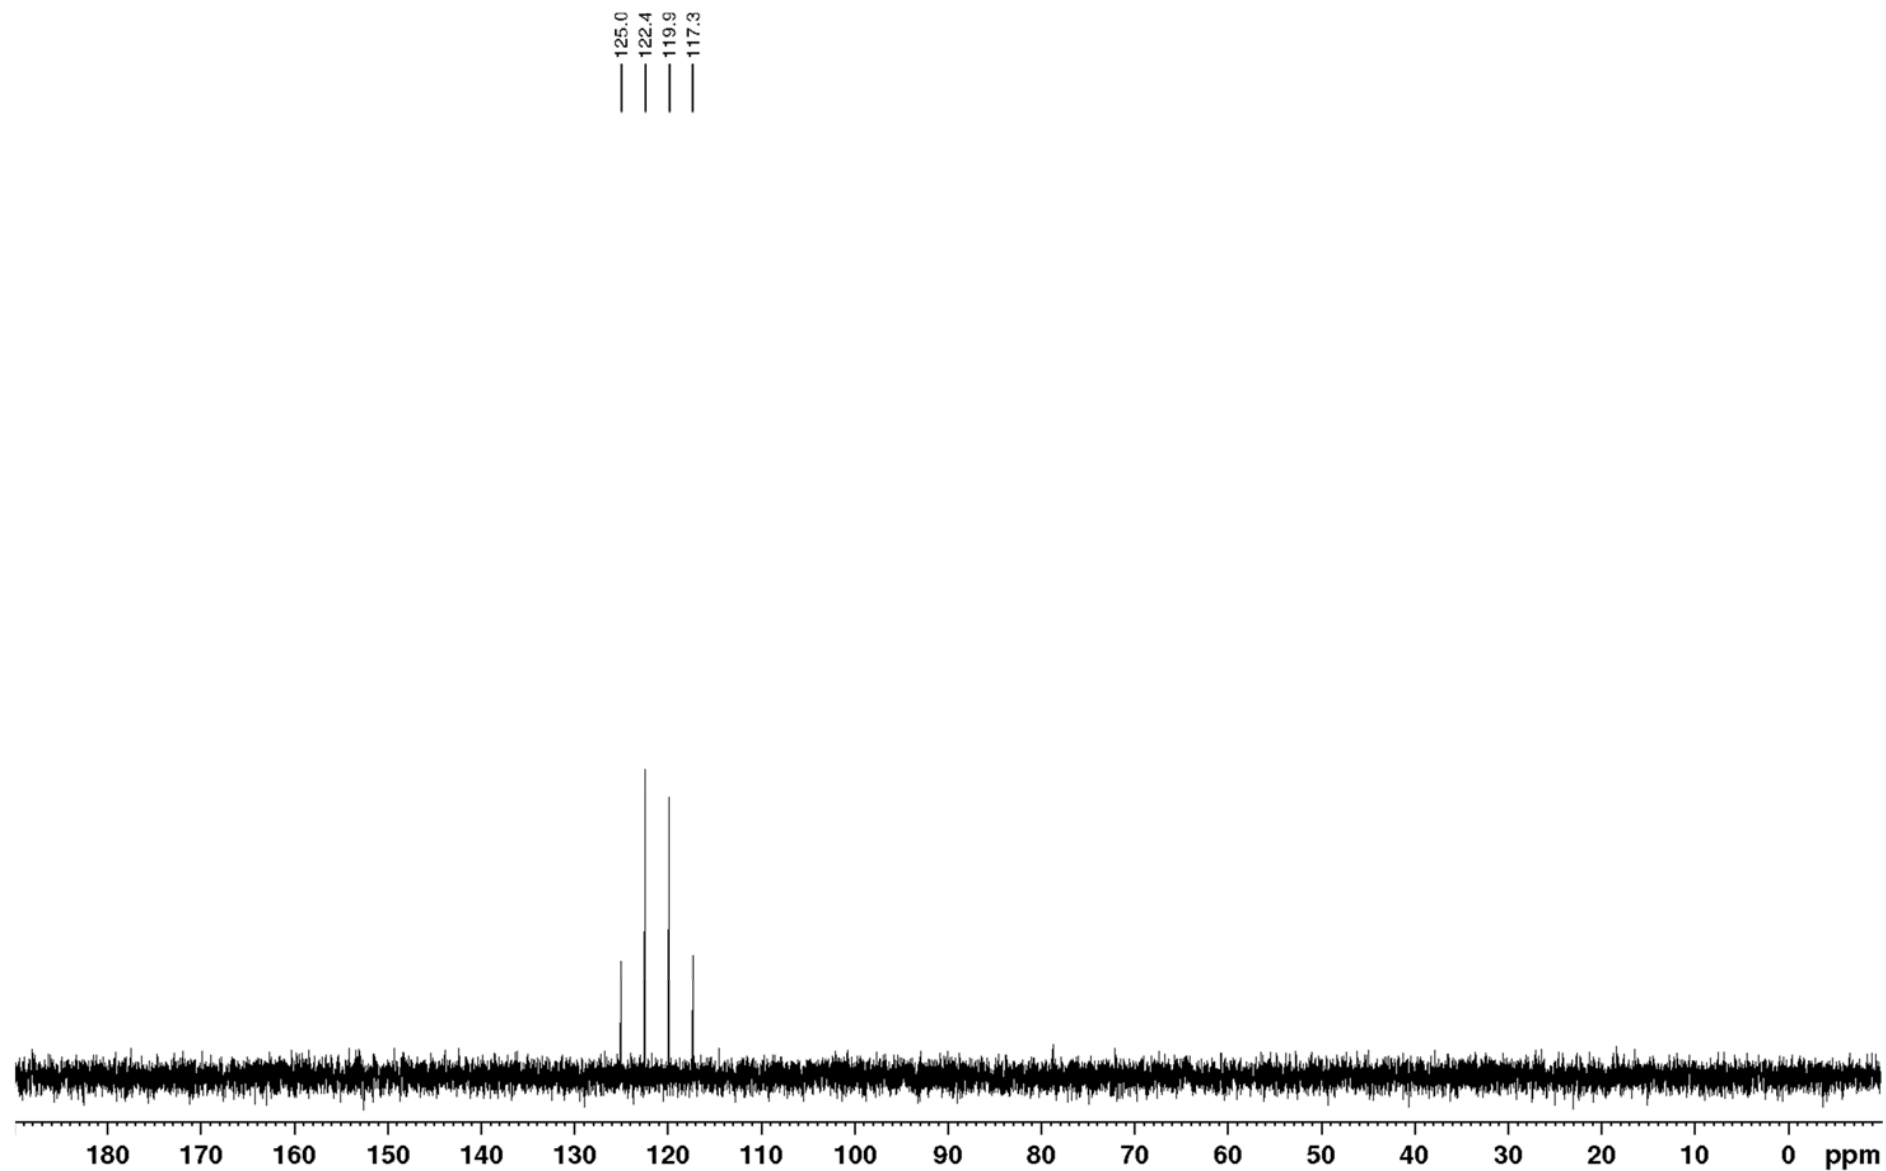

## SUPPORTING INFORMATION

 $^{19}\text{F}\{^1\text{H}\}$  NMR (471 MHz,  $\text{DMSO-}d_6$ ):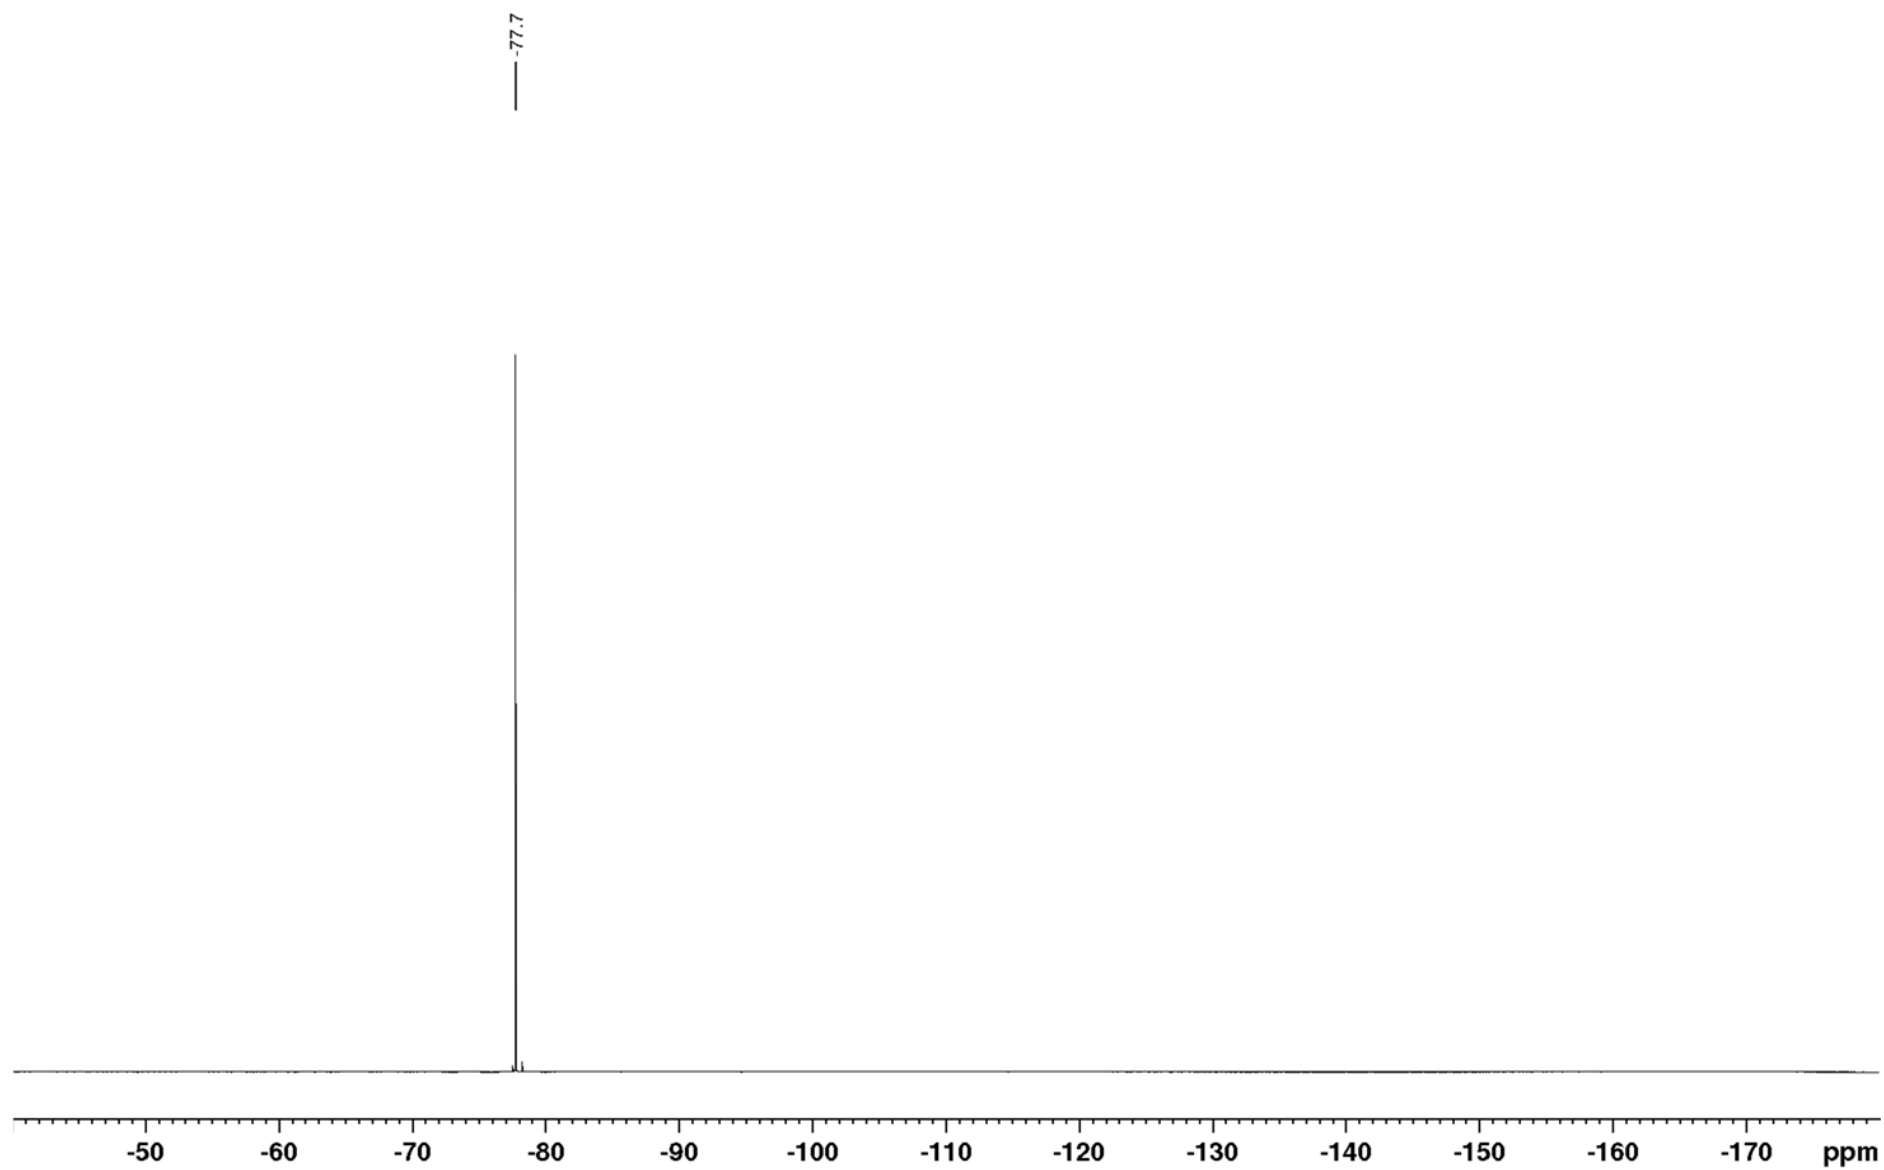

## SUPPORTING INFORMATION

***N,N,N*-Trimethyl-1,2,3,4-tetrahydronaphthalen-1-aminium trifluoromethanesulfonate (1q).**

<sup>1</sup>H NMR (400 MHz, DMSO-  
d<sub>6</sub>):

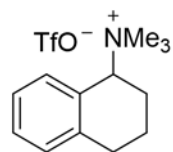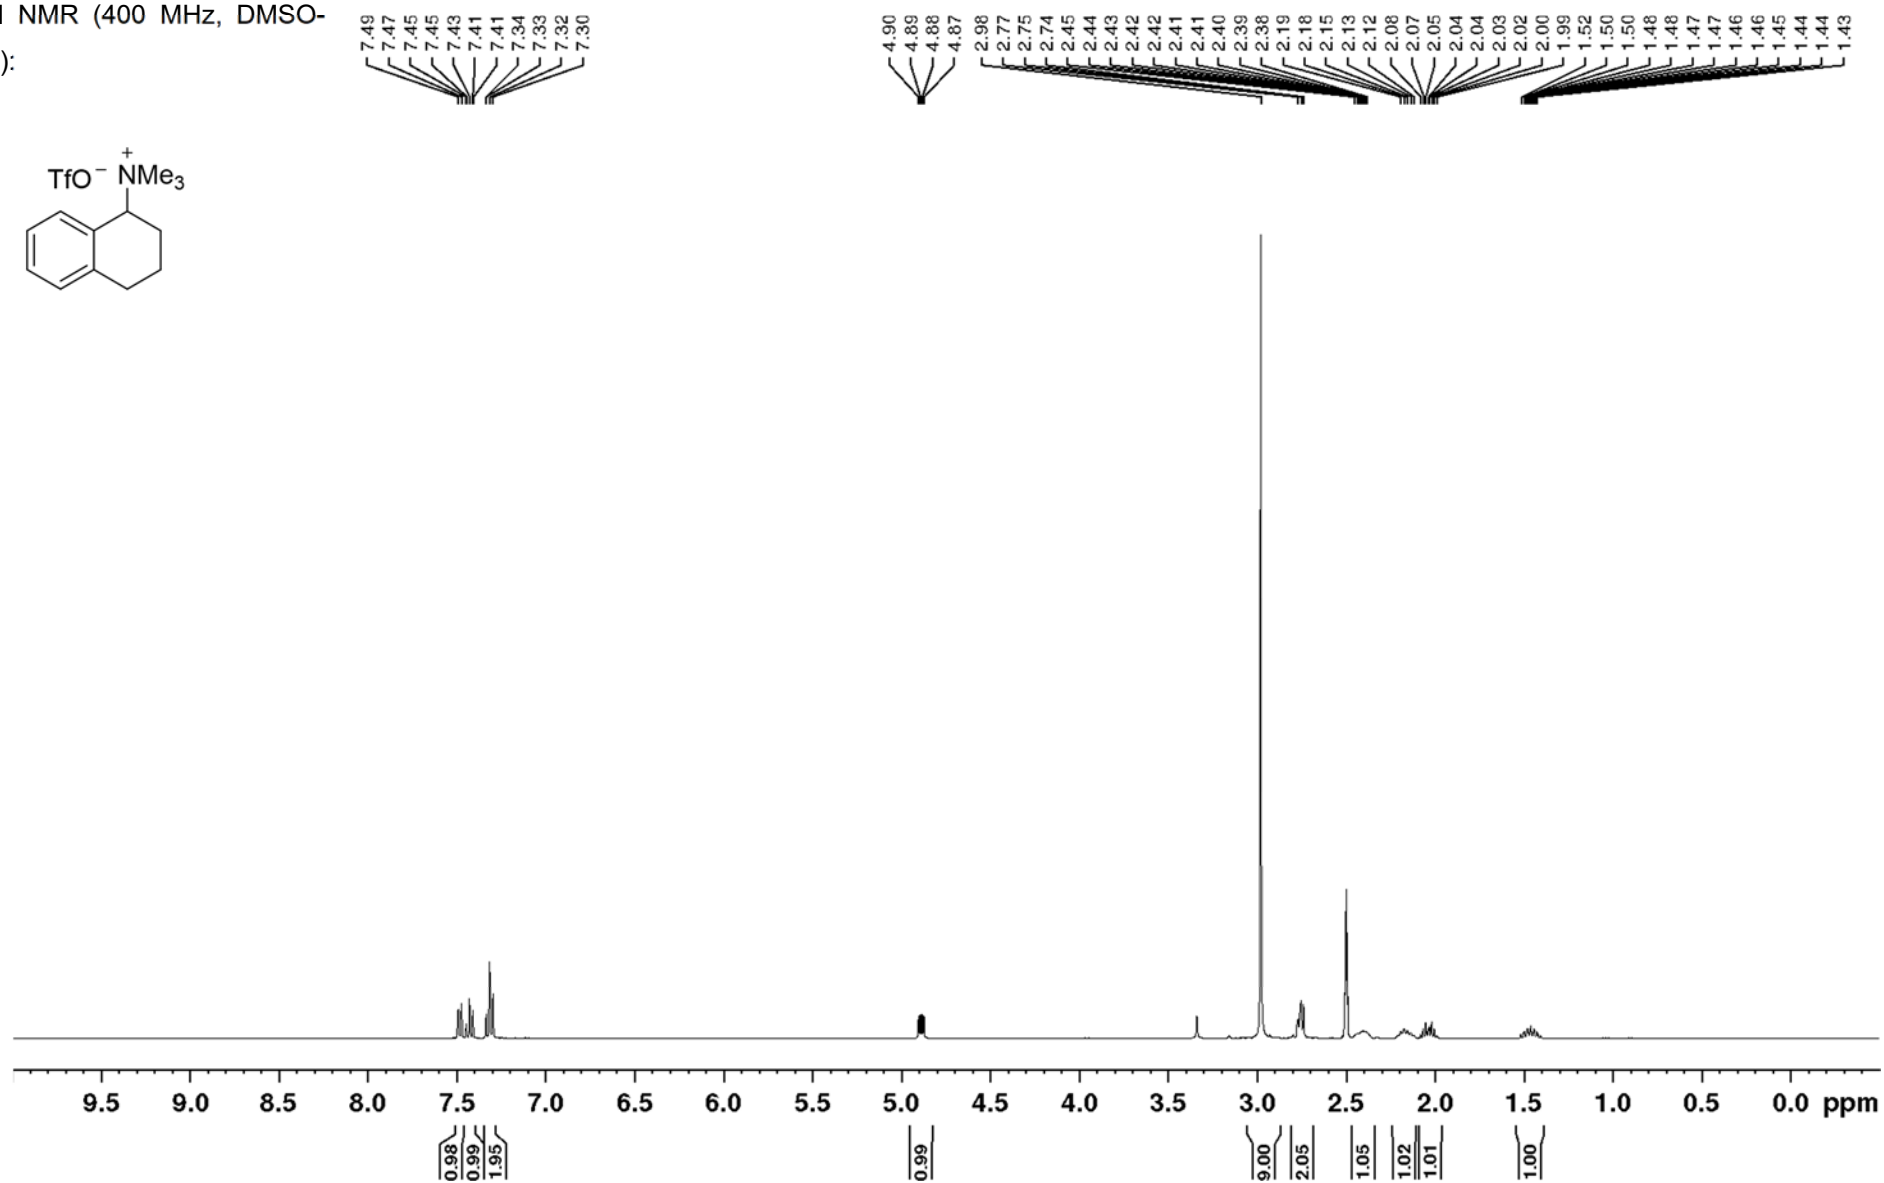

## SUPPORTING INFORMATION

 $^{13}\text{C}\{^1\text{H}\}$  NMR (176 MHz,  $\text{DMSO-}d_6$ ):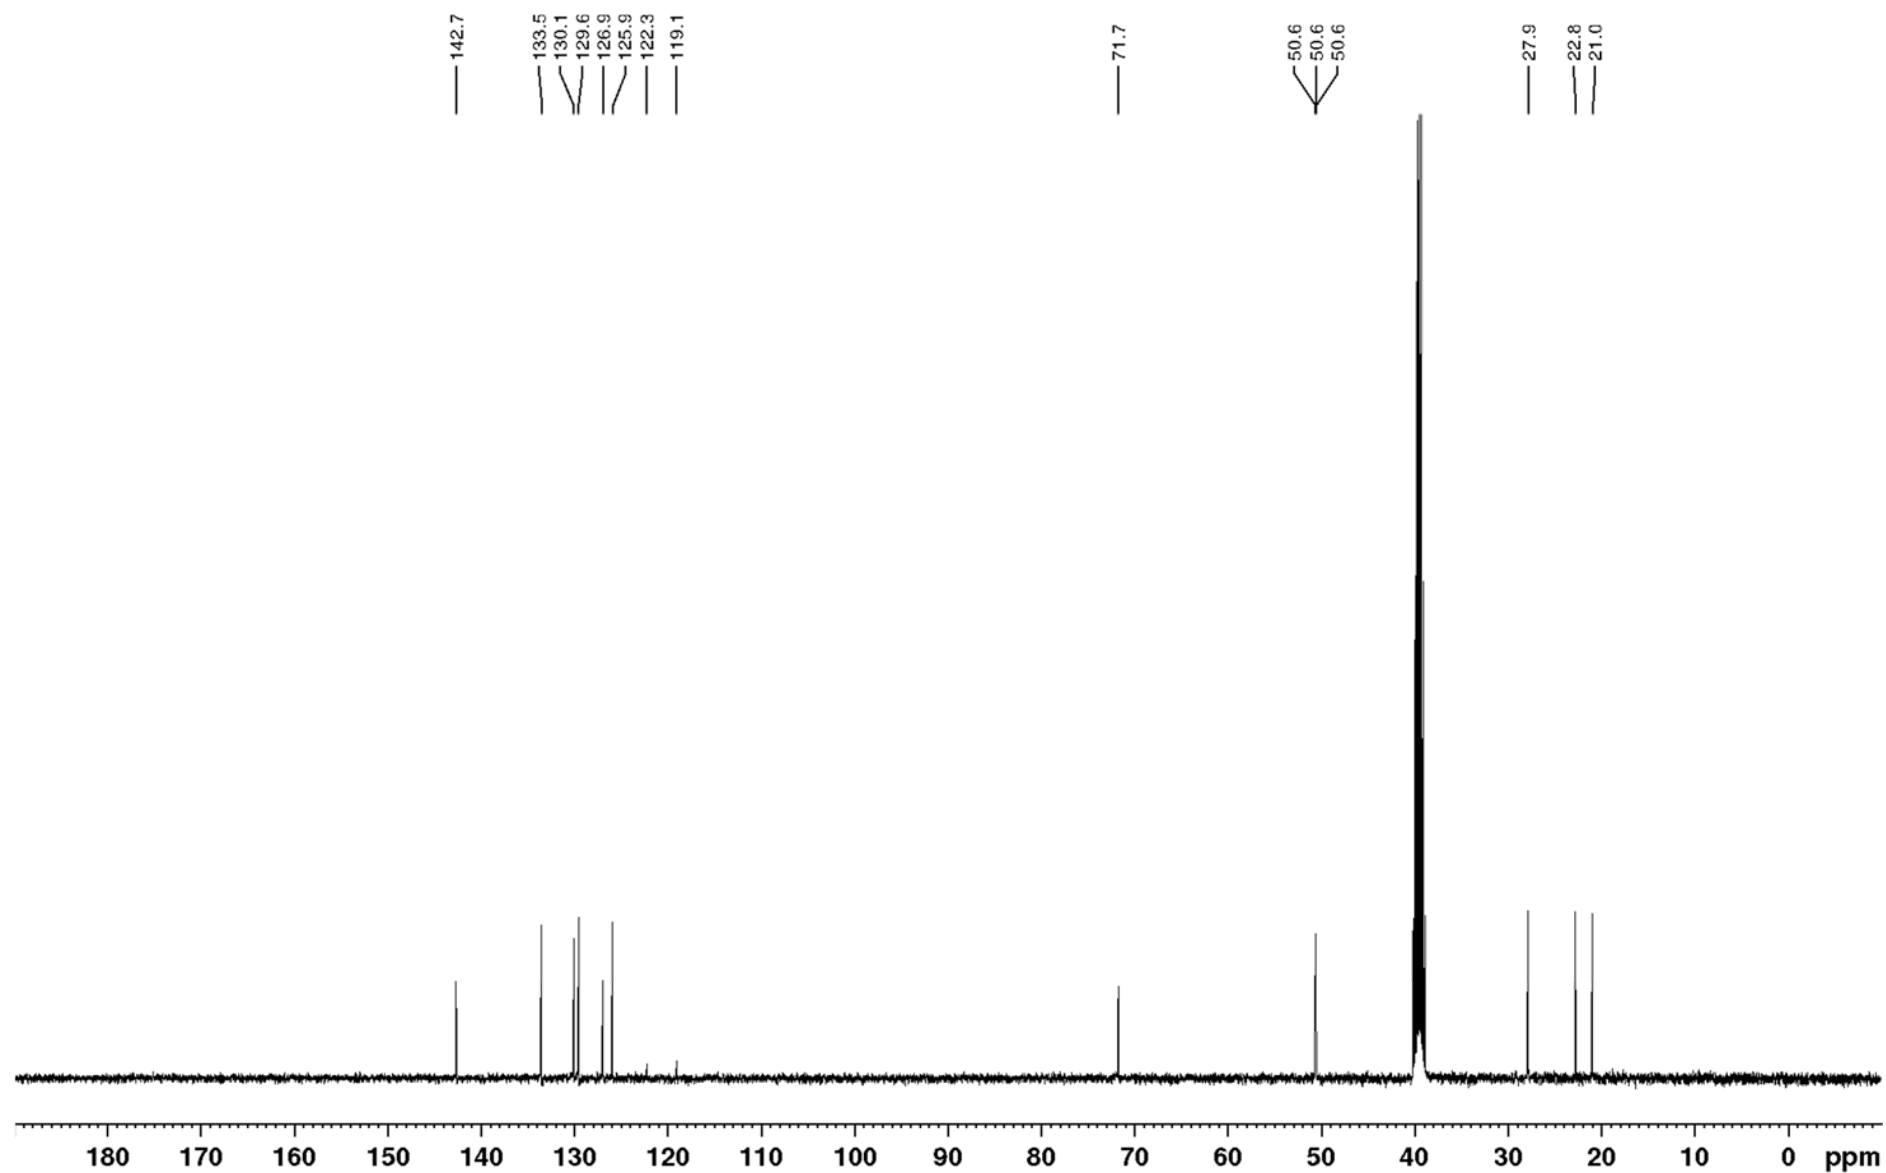

## SUPPORTING INFORMATION

 $^{13}\text{C}\{^{19}\text{F}\}$  DEPT NMR (176 MHz,  $\text{DMSO-}d_6$ ):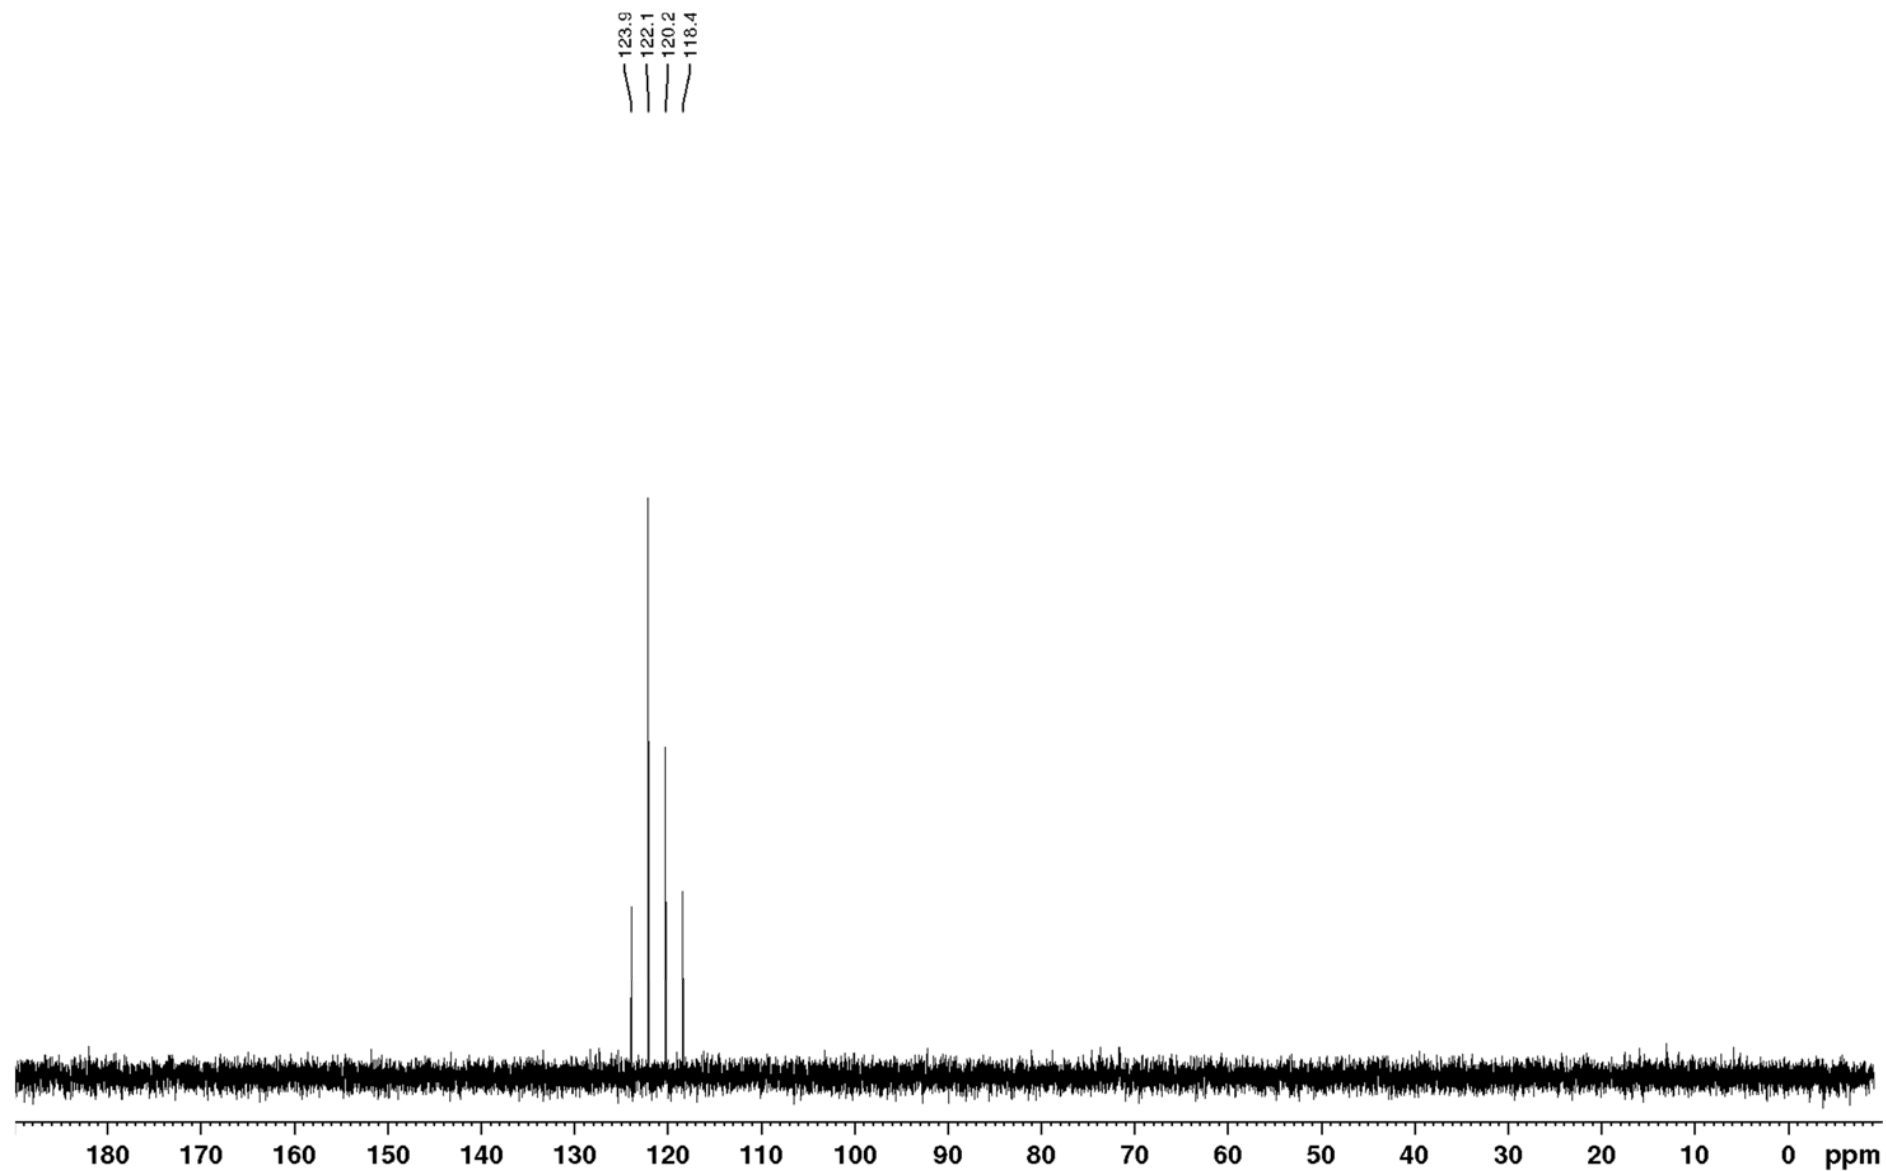

## SUPPORTING INFORMATION

 $^{19}\text{F}\{^1\text{H}\}$  NMR (659 MHz,  $\text{DMSO-}d_6$ ):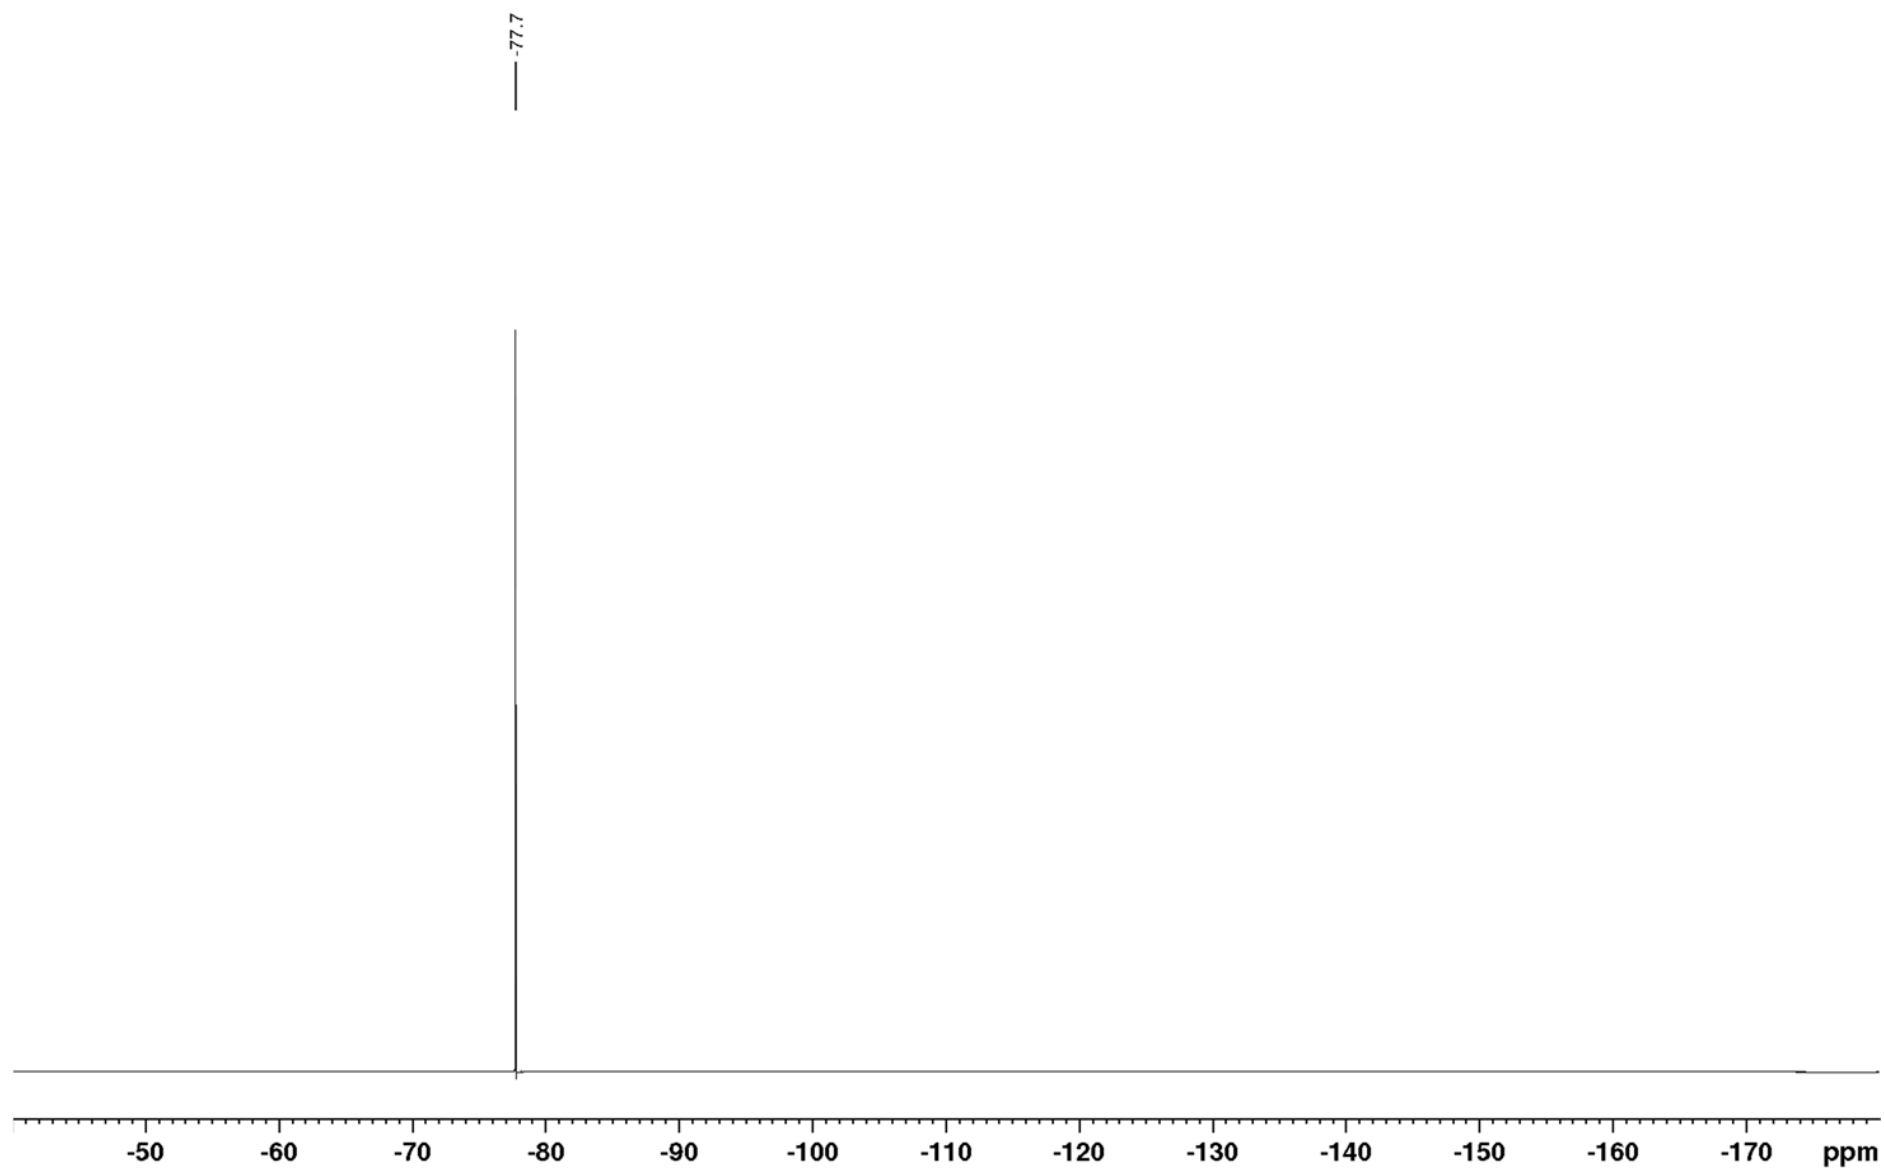

SUPPORTING INFORMATION

---

**1-Cyclopropyl-*N,N,N*-trimethyl-1-phenylmethanaminium trifluoromethanesulfonate (1r)**

<sup>1</sup>H NMR (500 MHz, DMSO-*d*<sub>6</sub>):

## SUPPORTING INFORMATION

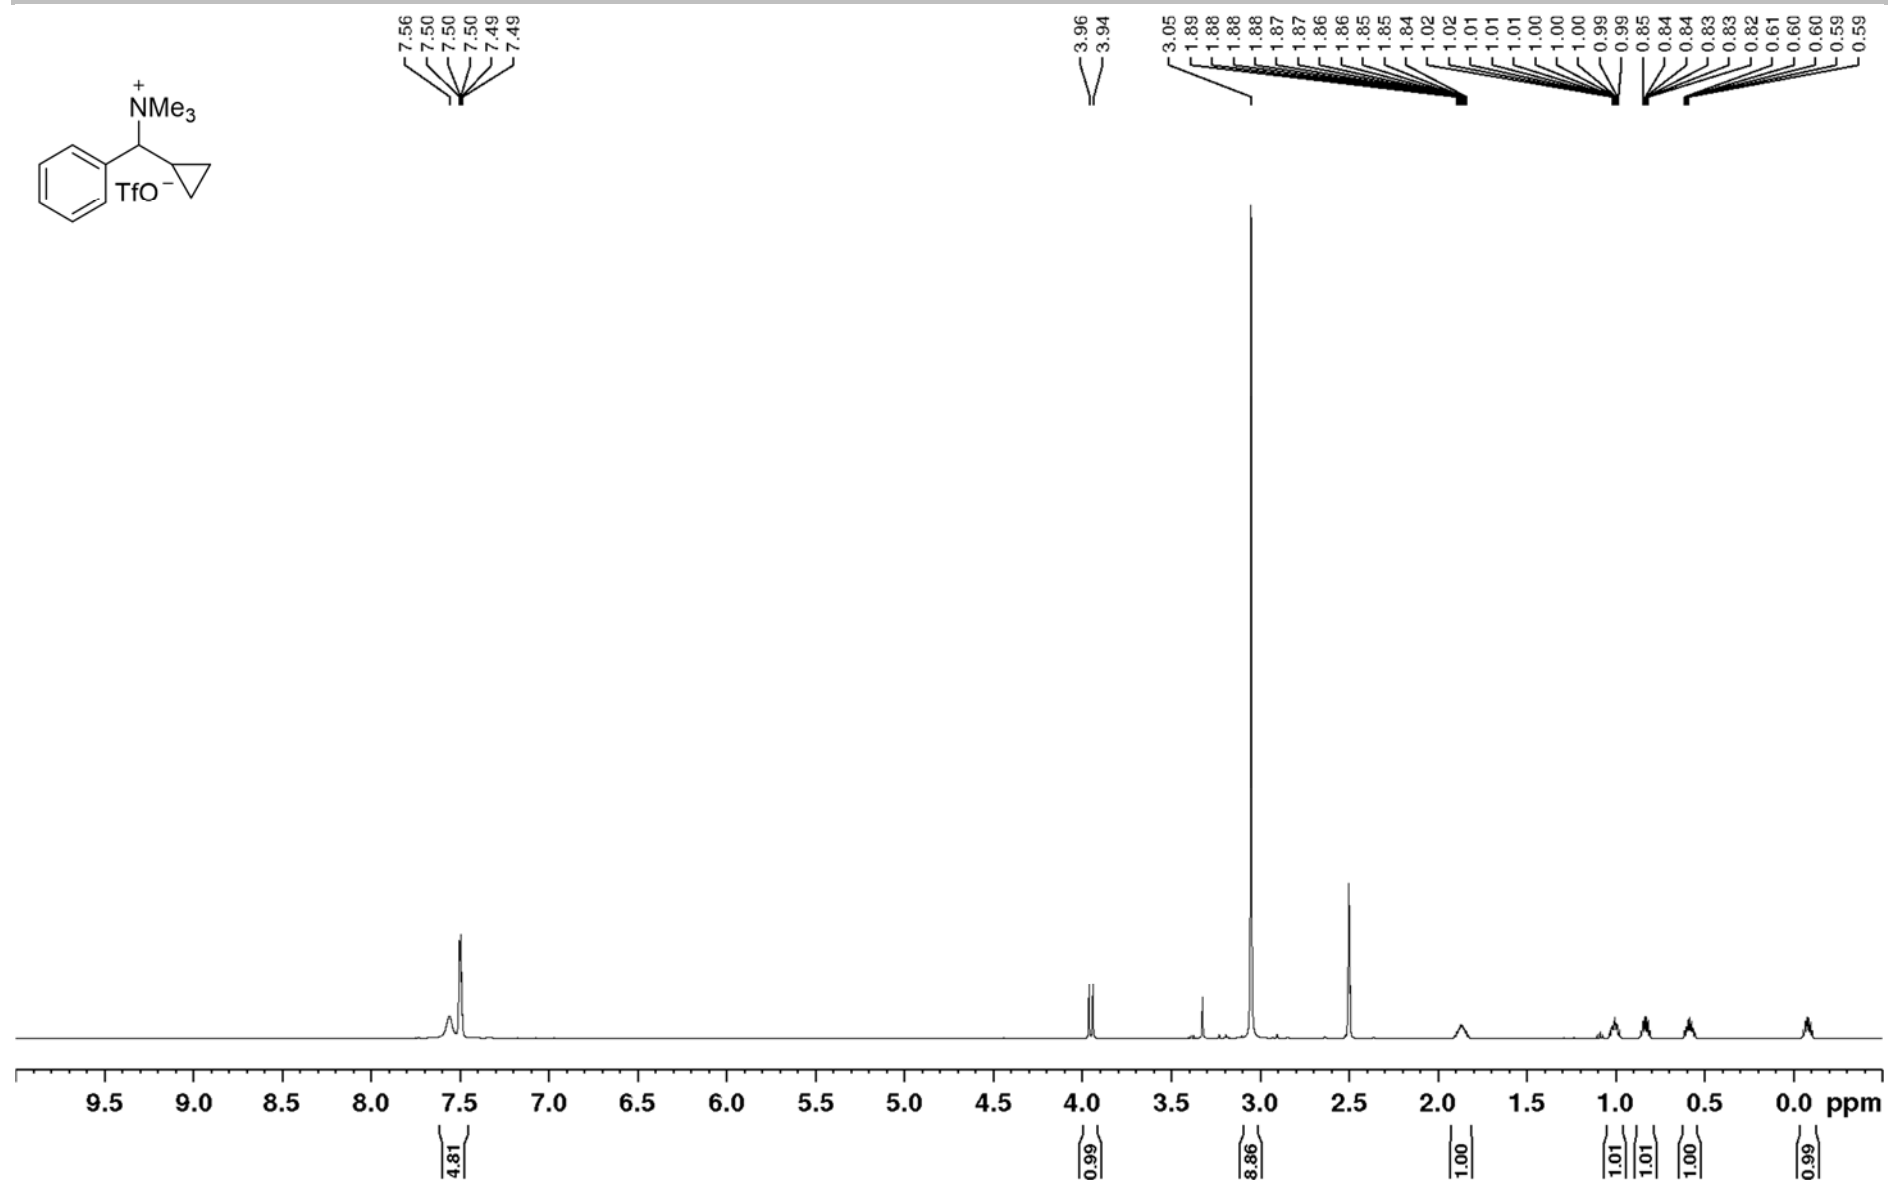



## SUPPORTING INFORMATION

 $^{13}\text{C}\{^1\text{H}\}$  NMR (126 MHz,  $\text{DMSO-}d_6$ ):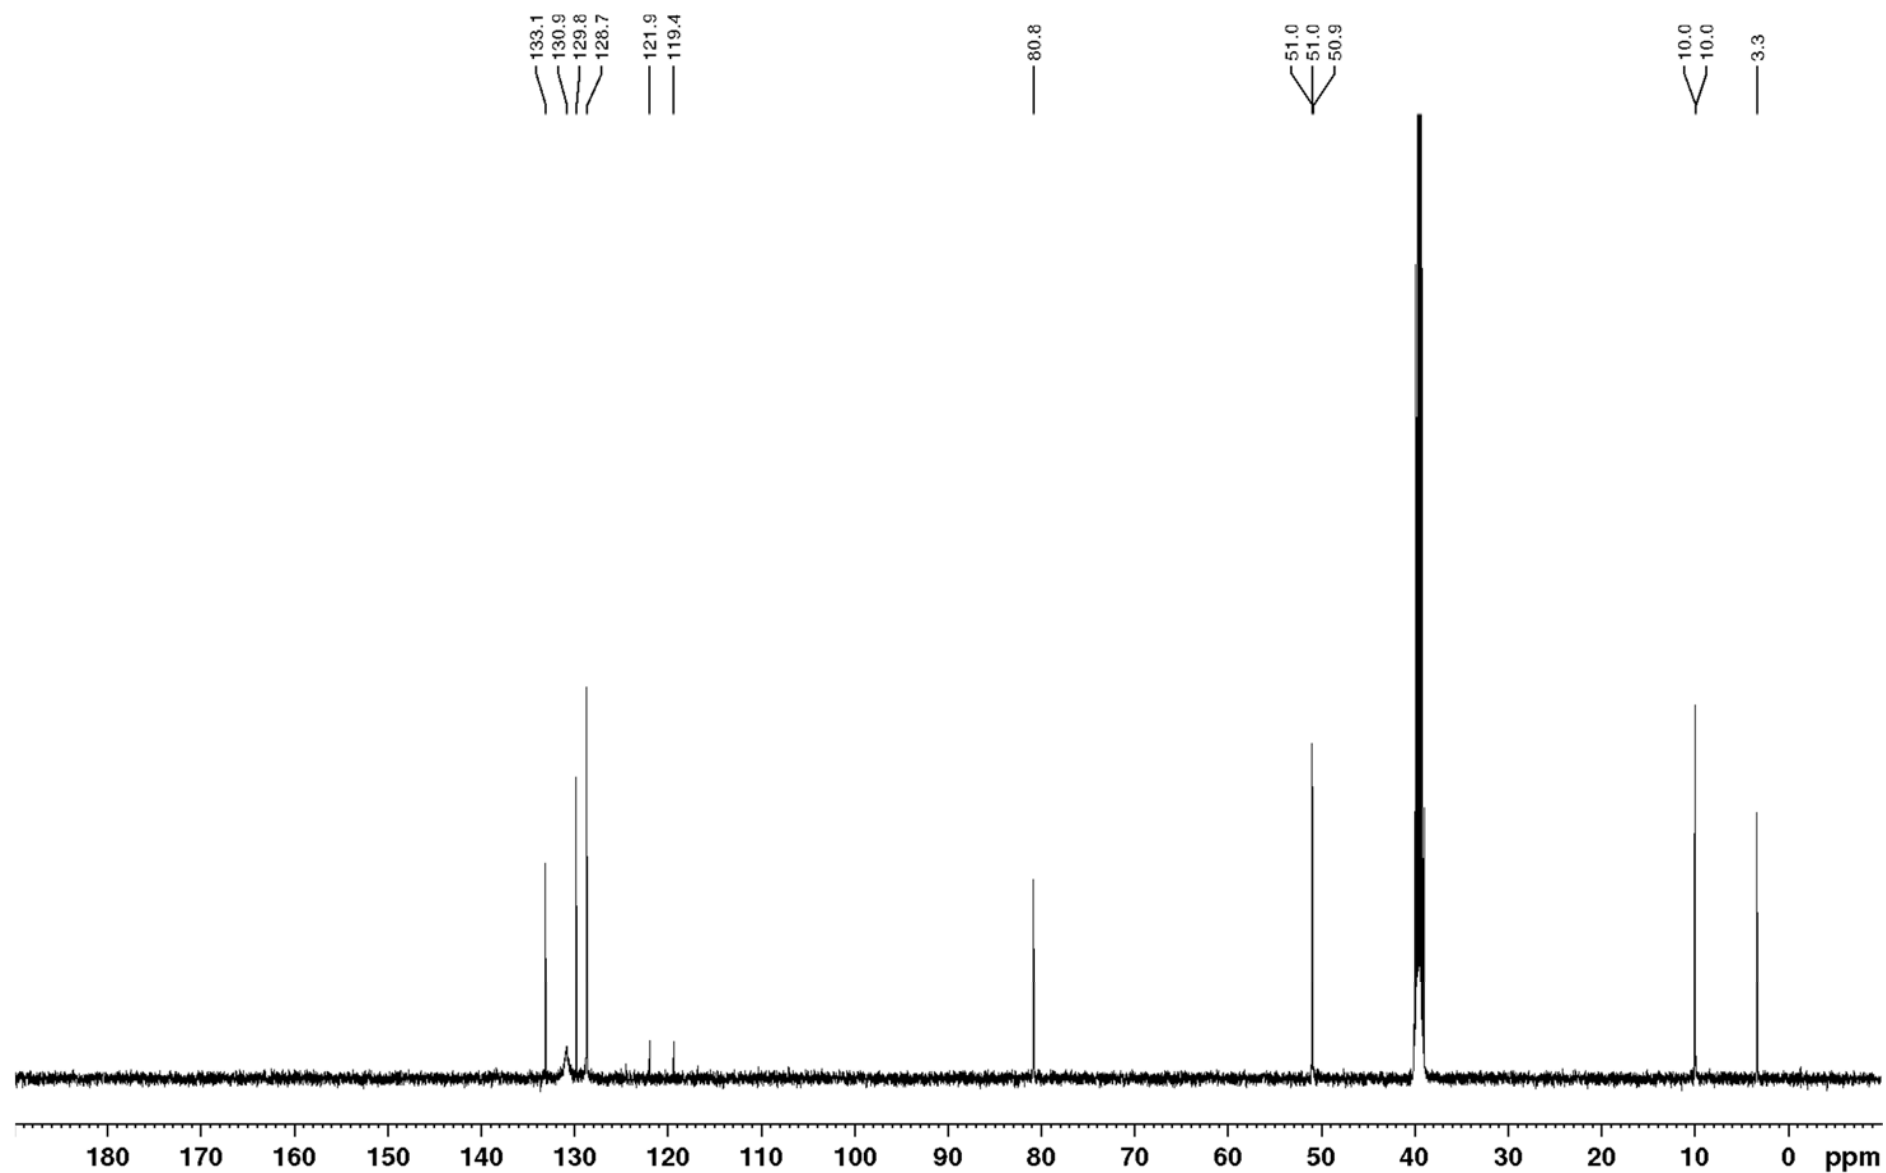

## SUPPORTING INFORMATION

 $^{13}\text{C}\{^{19}\text{F}\}$  DEPT NMR (176 MHz,  $\text{DMSO-}d_6$ ):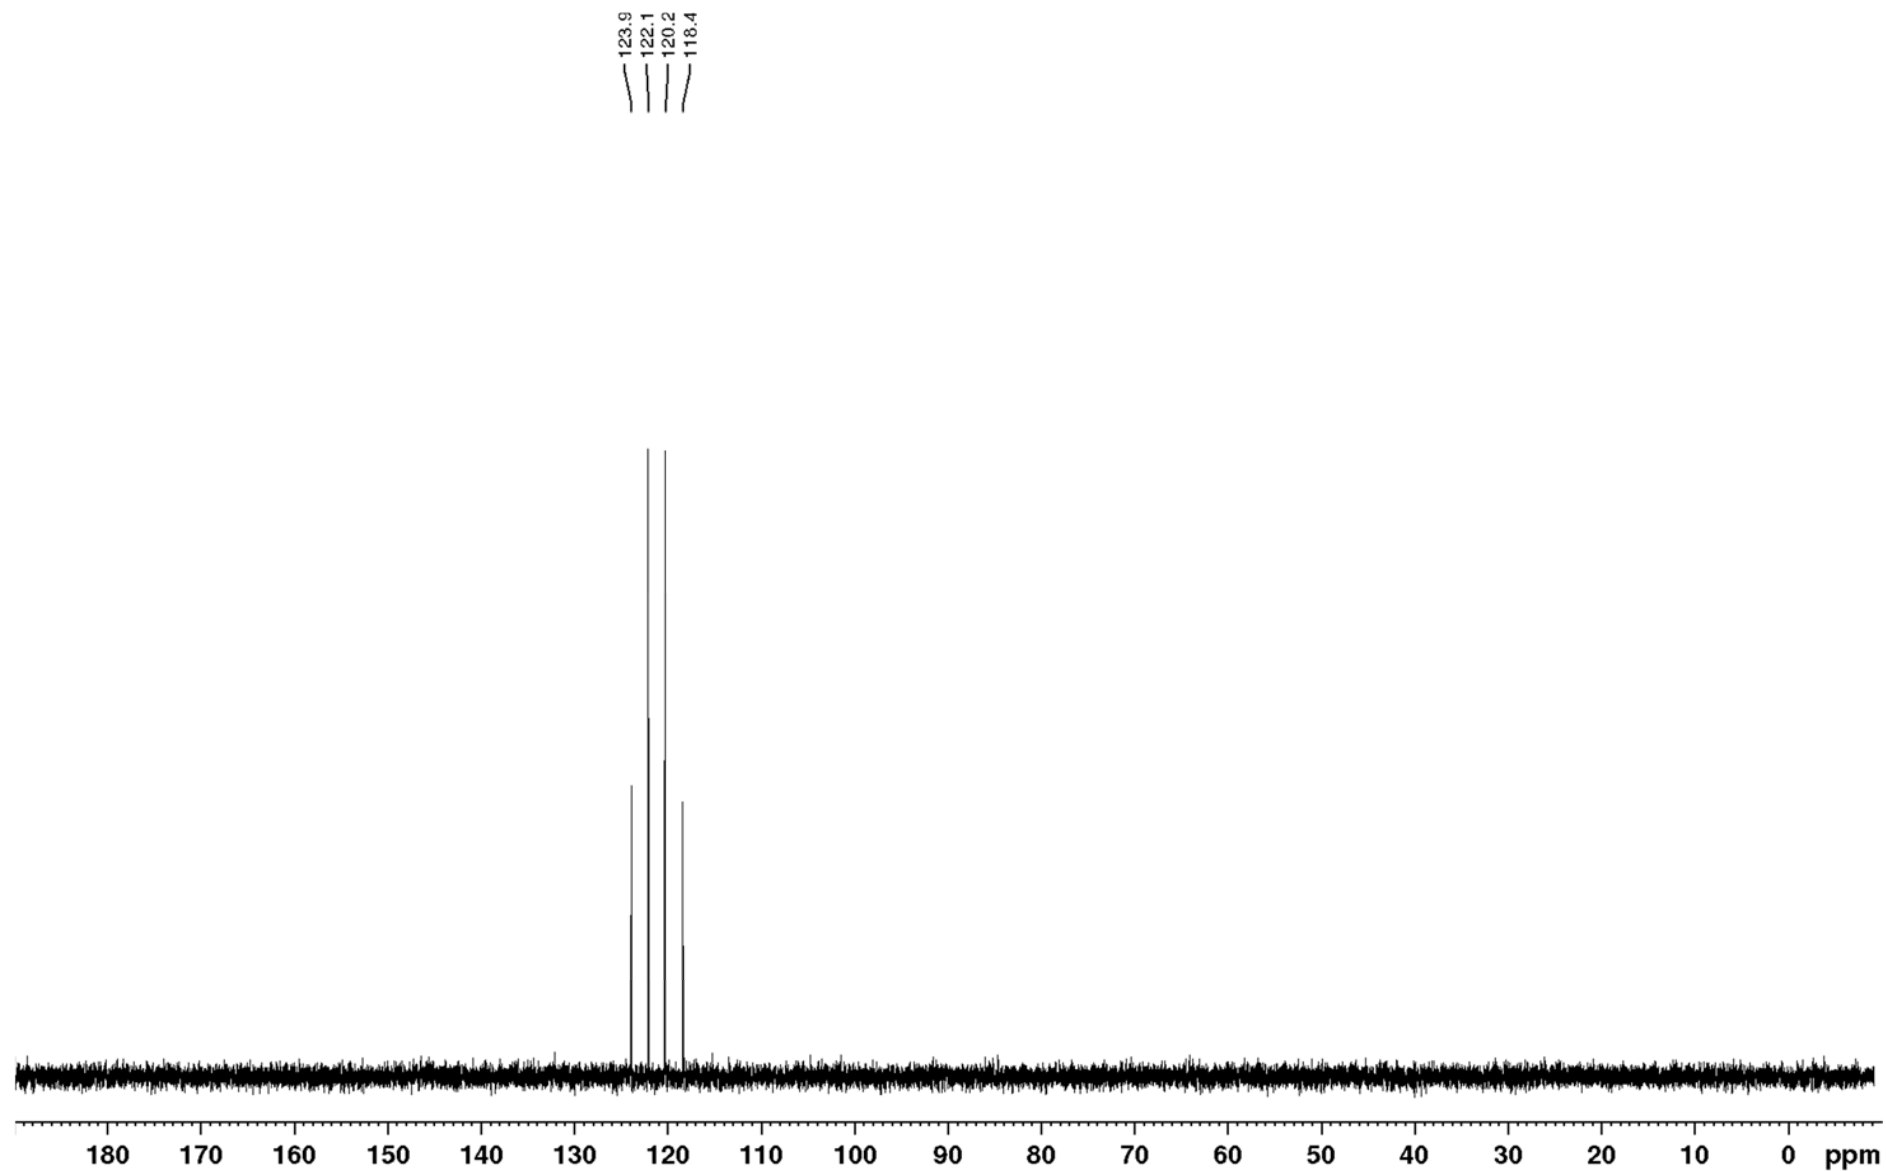

## SUPPORTING INFORMATION

 $^{19}\text{F}\{^1\text{H}\}$  NMR (471 MHz,  $\text{DMSO-}d_6$ ):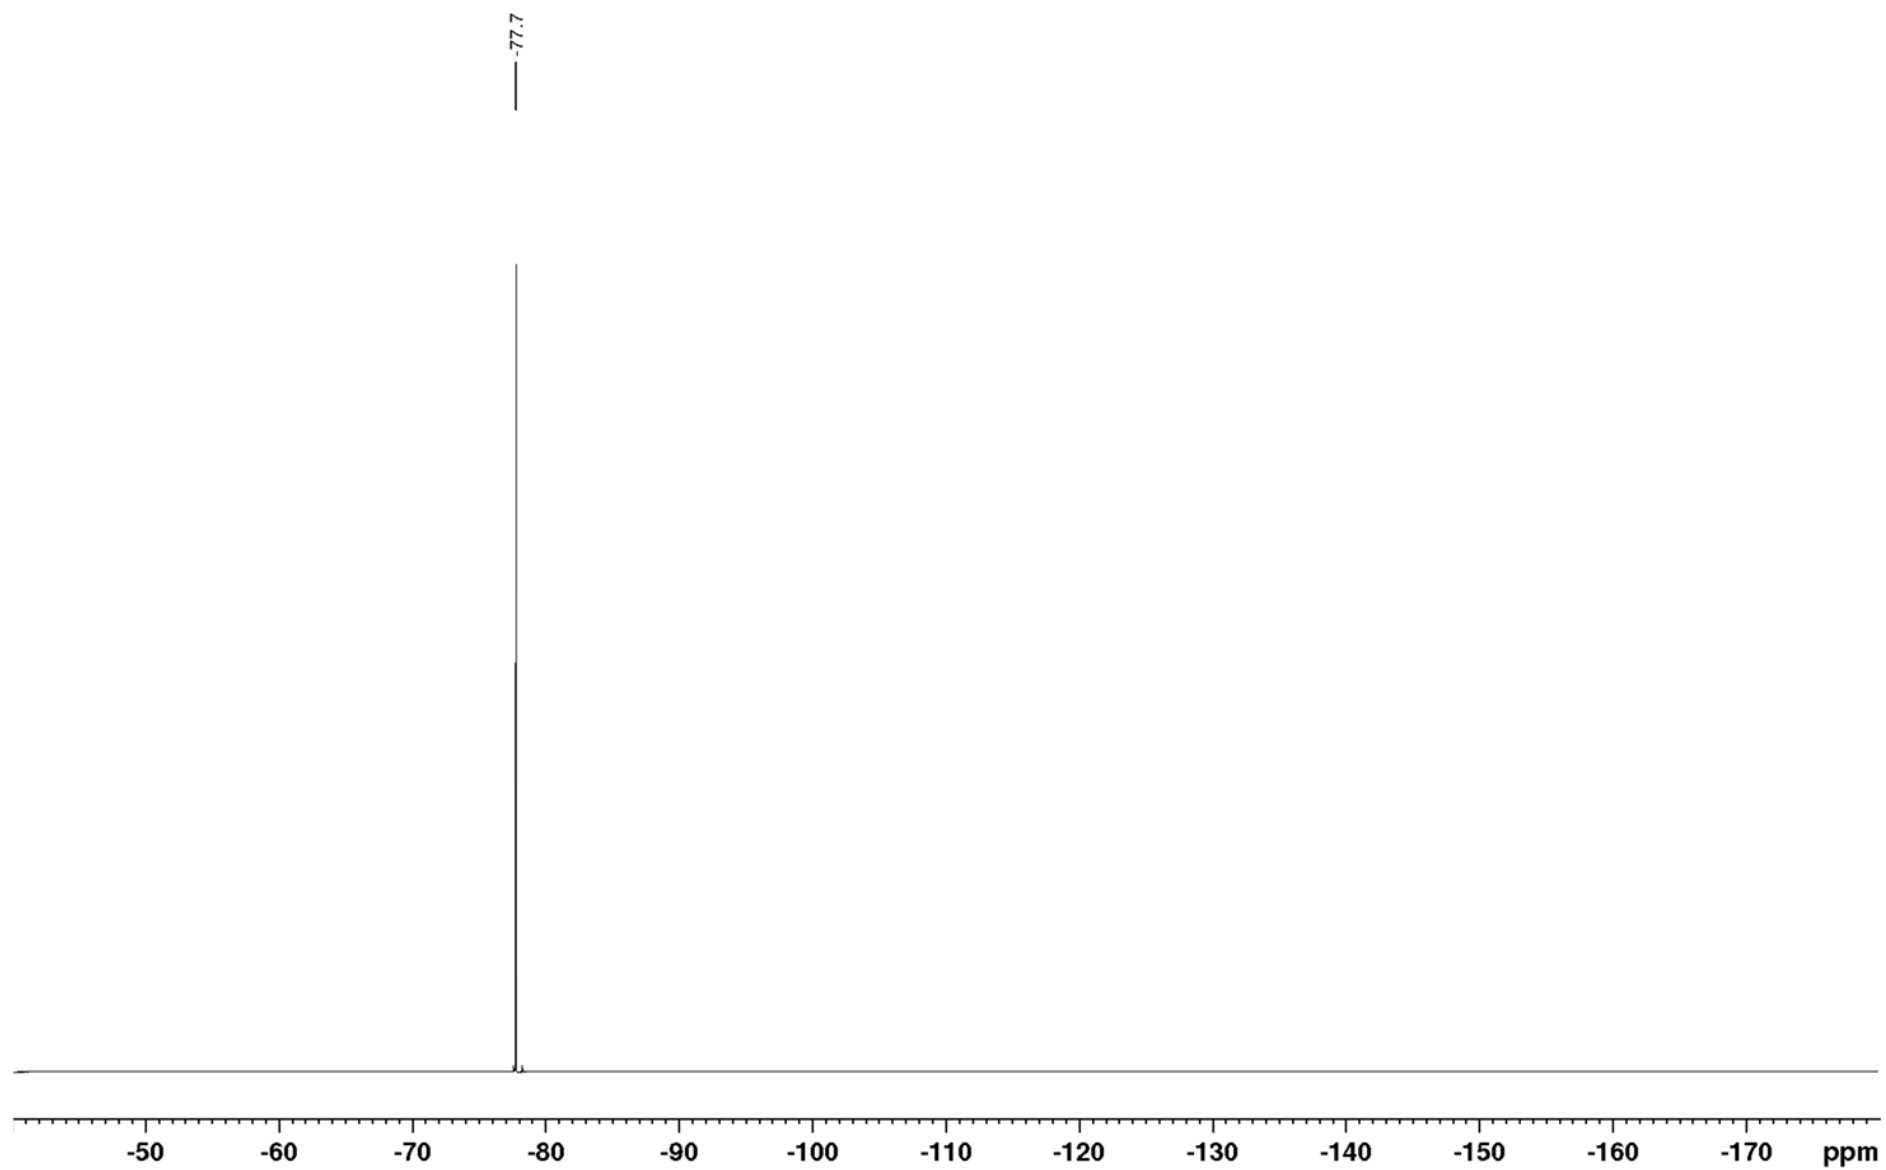

## SUPPORTING INFORMATION

***N,N,N,2*-Tetramethyl-1-phenylpropan-1-aminium trifluoromethanesulfonate (1s)**<sup>1</sup>H NMR (400 MHz,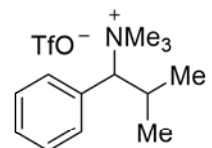

7.74  
7.72  
7.72  
7.67  
7.61  
7.60  
7.50  
7.48  
7.45  
7.44  
7.43  
7.43  
7.39

4.50  
4.49

3.07  
2.82  
2.81  
2.80  
2.79  
2.78  
2.76  
2.76  
2.75

0.96  
0.94  
0.93  
0.92

DMSO-*d*<sub>6</sub>):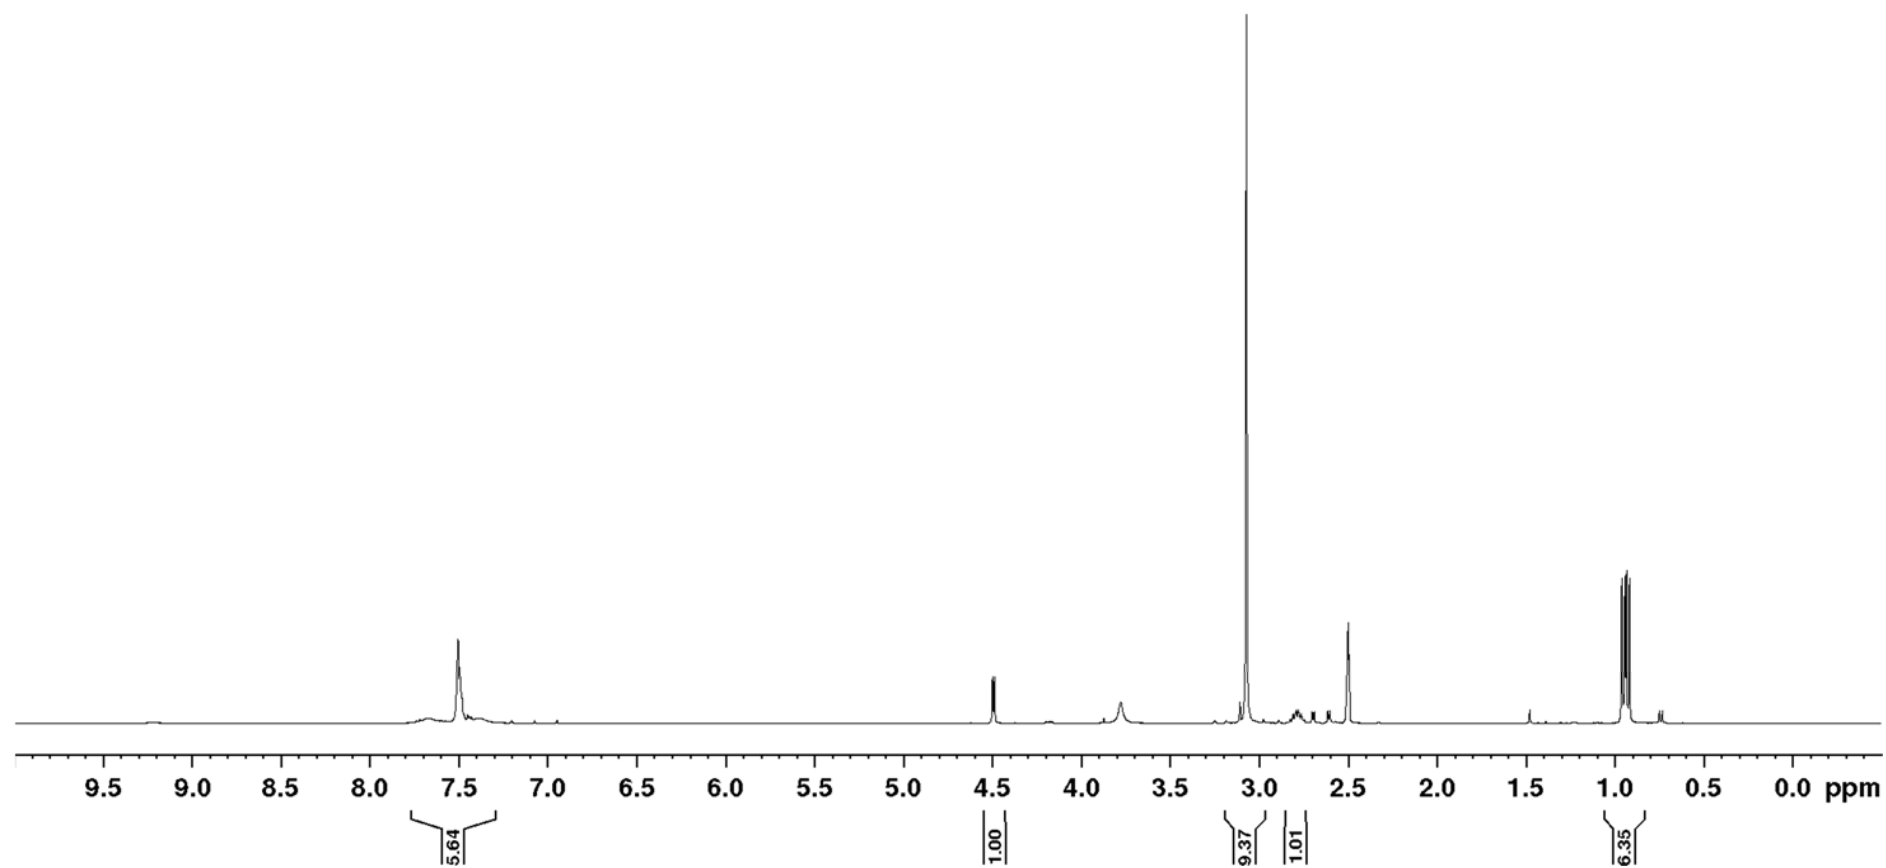

## SUPPORTING INFORMATION

 $^{13}\text{C}\{^1\text{H}\}$  NMR (101 MHz,  $\text{DMSO-}d_6$ ):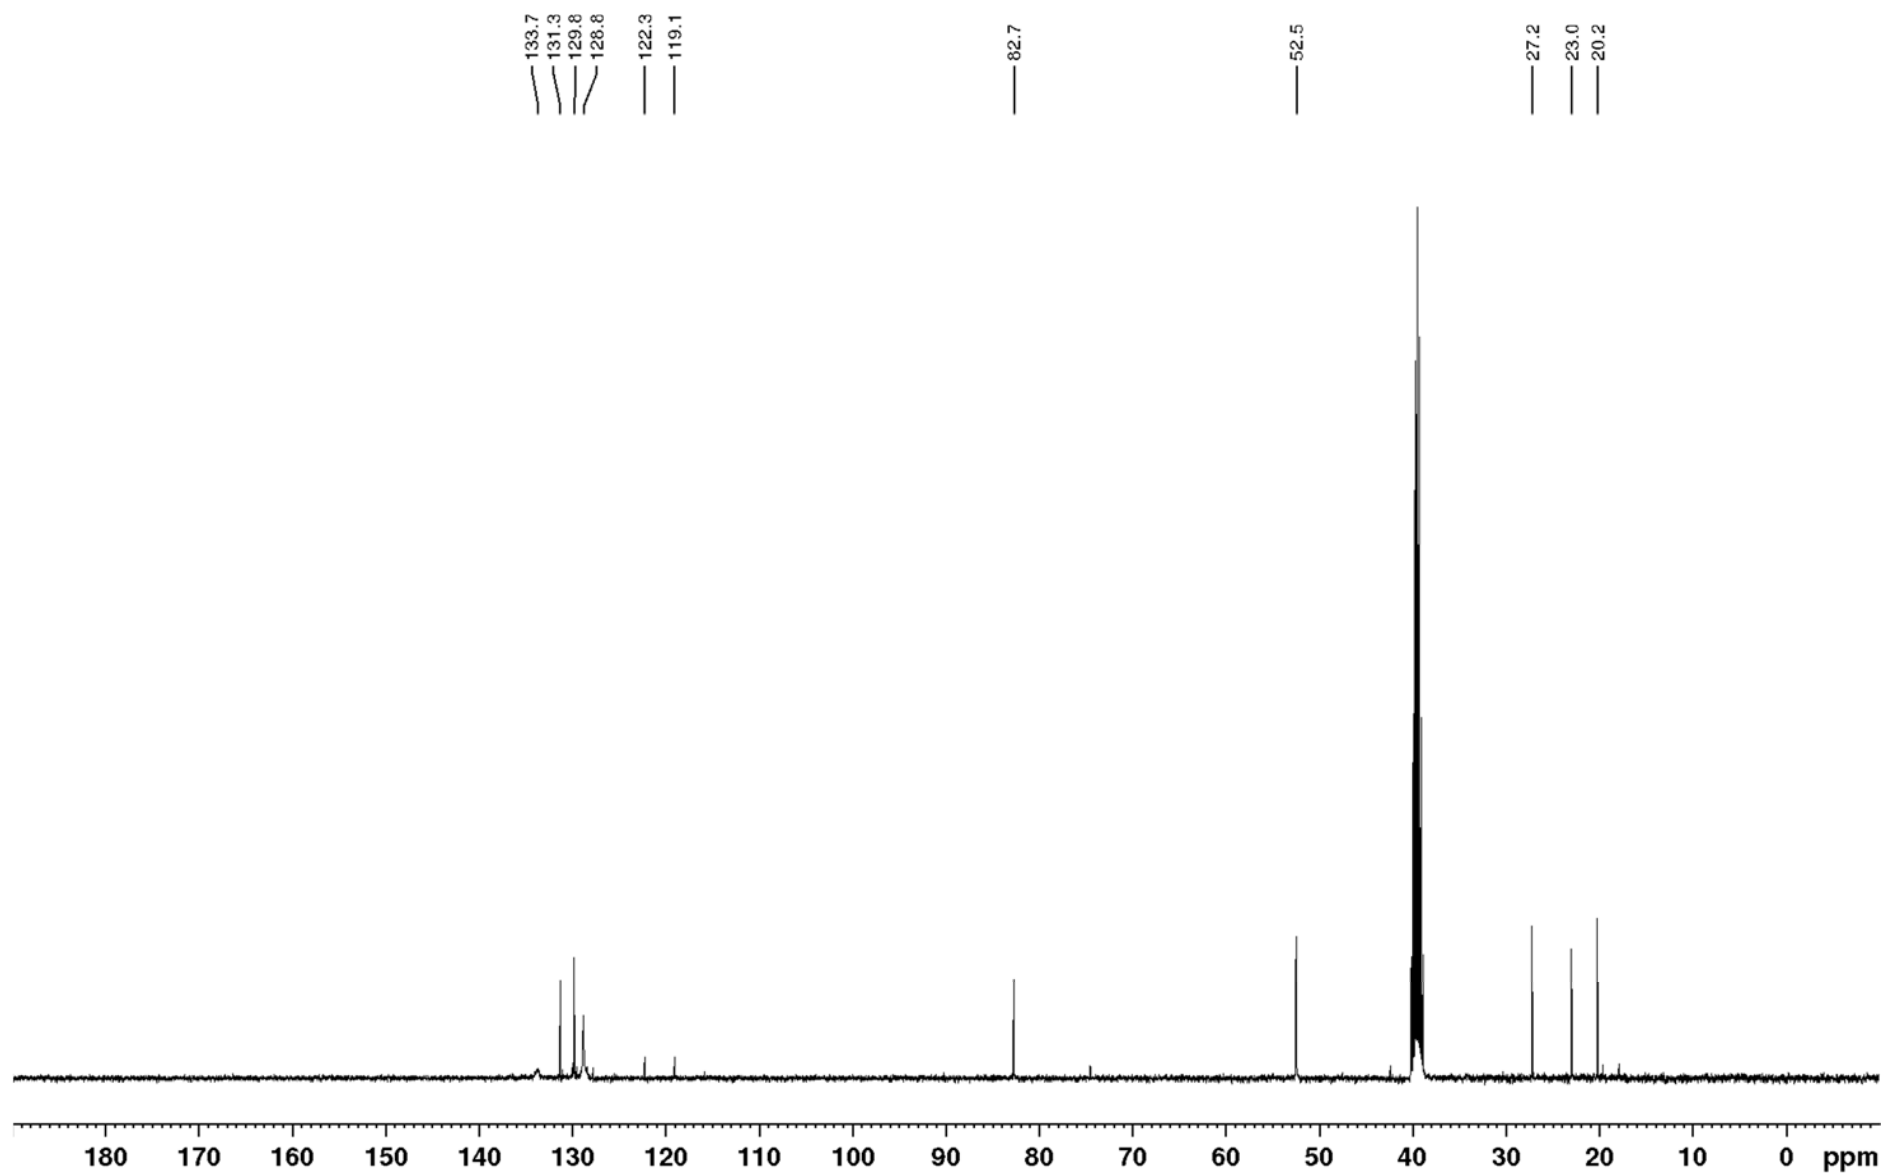

## SUPPORTING INFORMATION

 $^{13}\text{C}\{^{19}\text{F}\}$  DEPT NMR (126 MHz,  $\text{DMSO-}d_6$ ):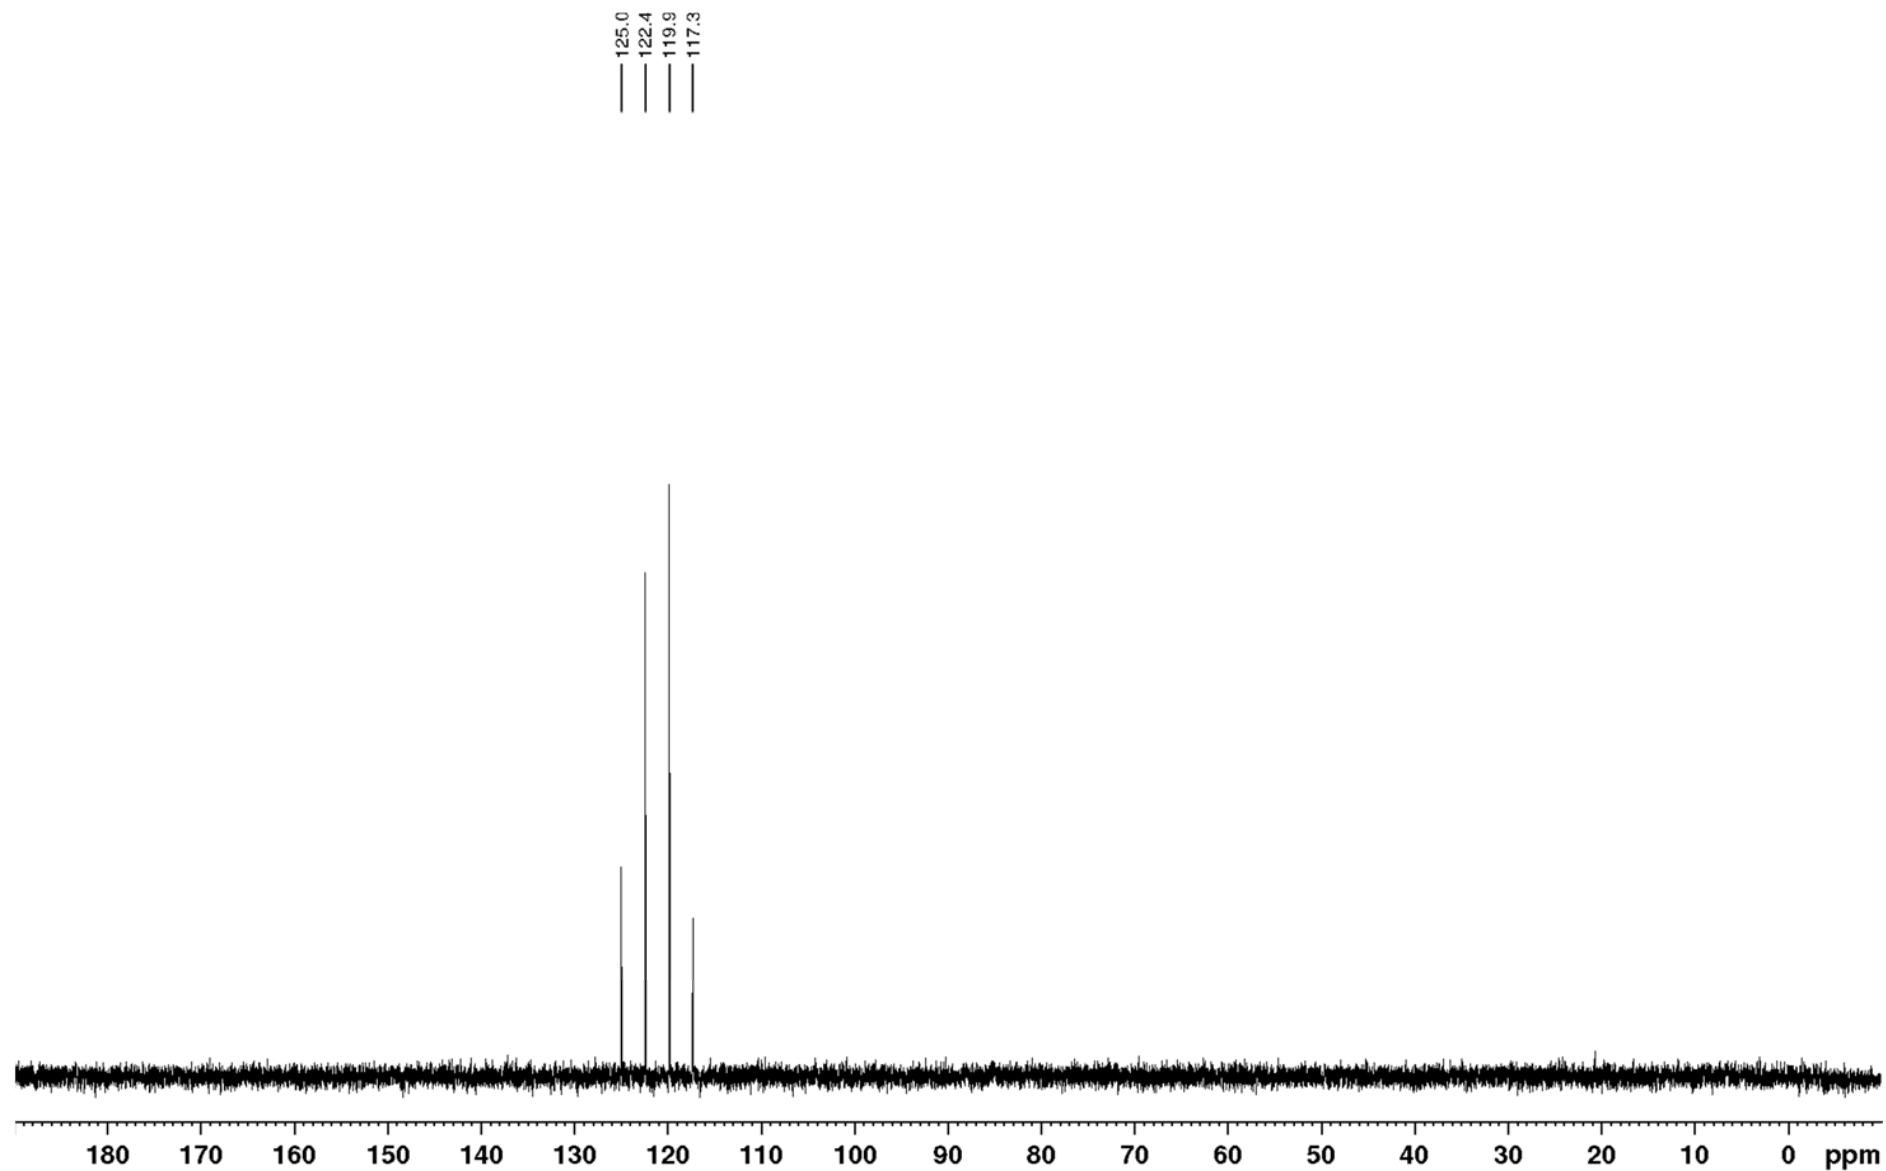

## SUPPORTING INFORMATION

 $^{19}\text{F}\{^1\text{H}\}$  NMR (471 MHz,  $\text{DMSO-}d_6$ ):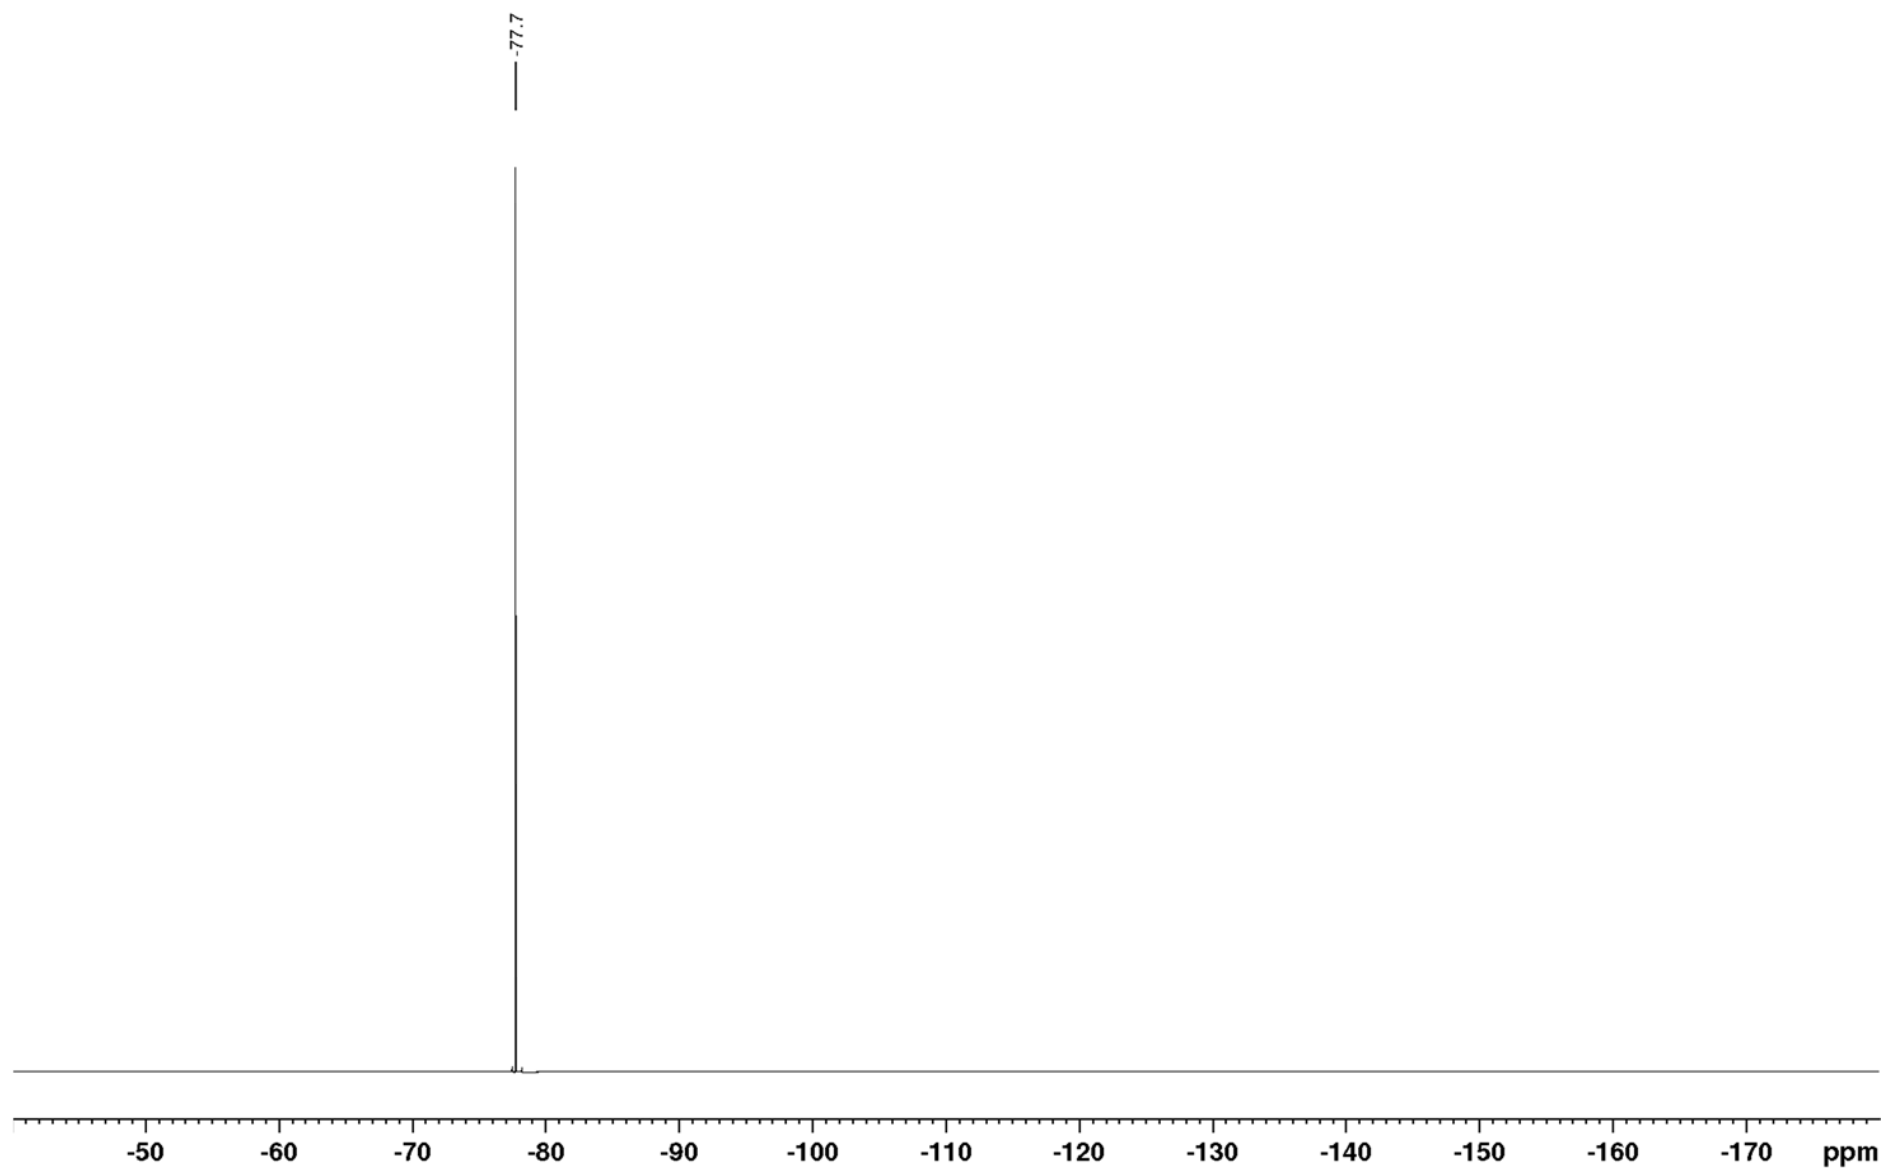

## SUPPORTING INFORMATION

***N,N,N,2,2*-Pentamethyl-1-phenylpropan-1-aminium trifluoromethanesulfonate (1t).**<sup>1</sup>H NMR (400 MHz,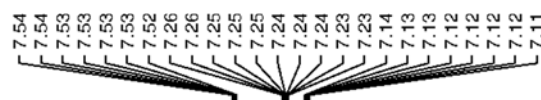DMSO-*d*<sub>6</sub>):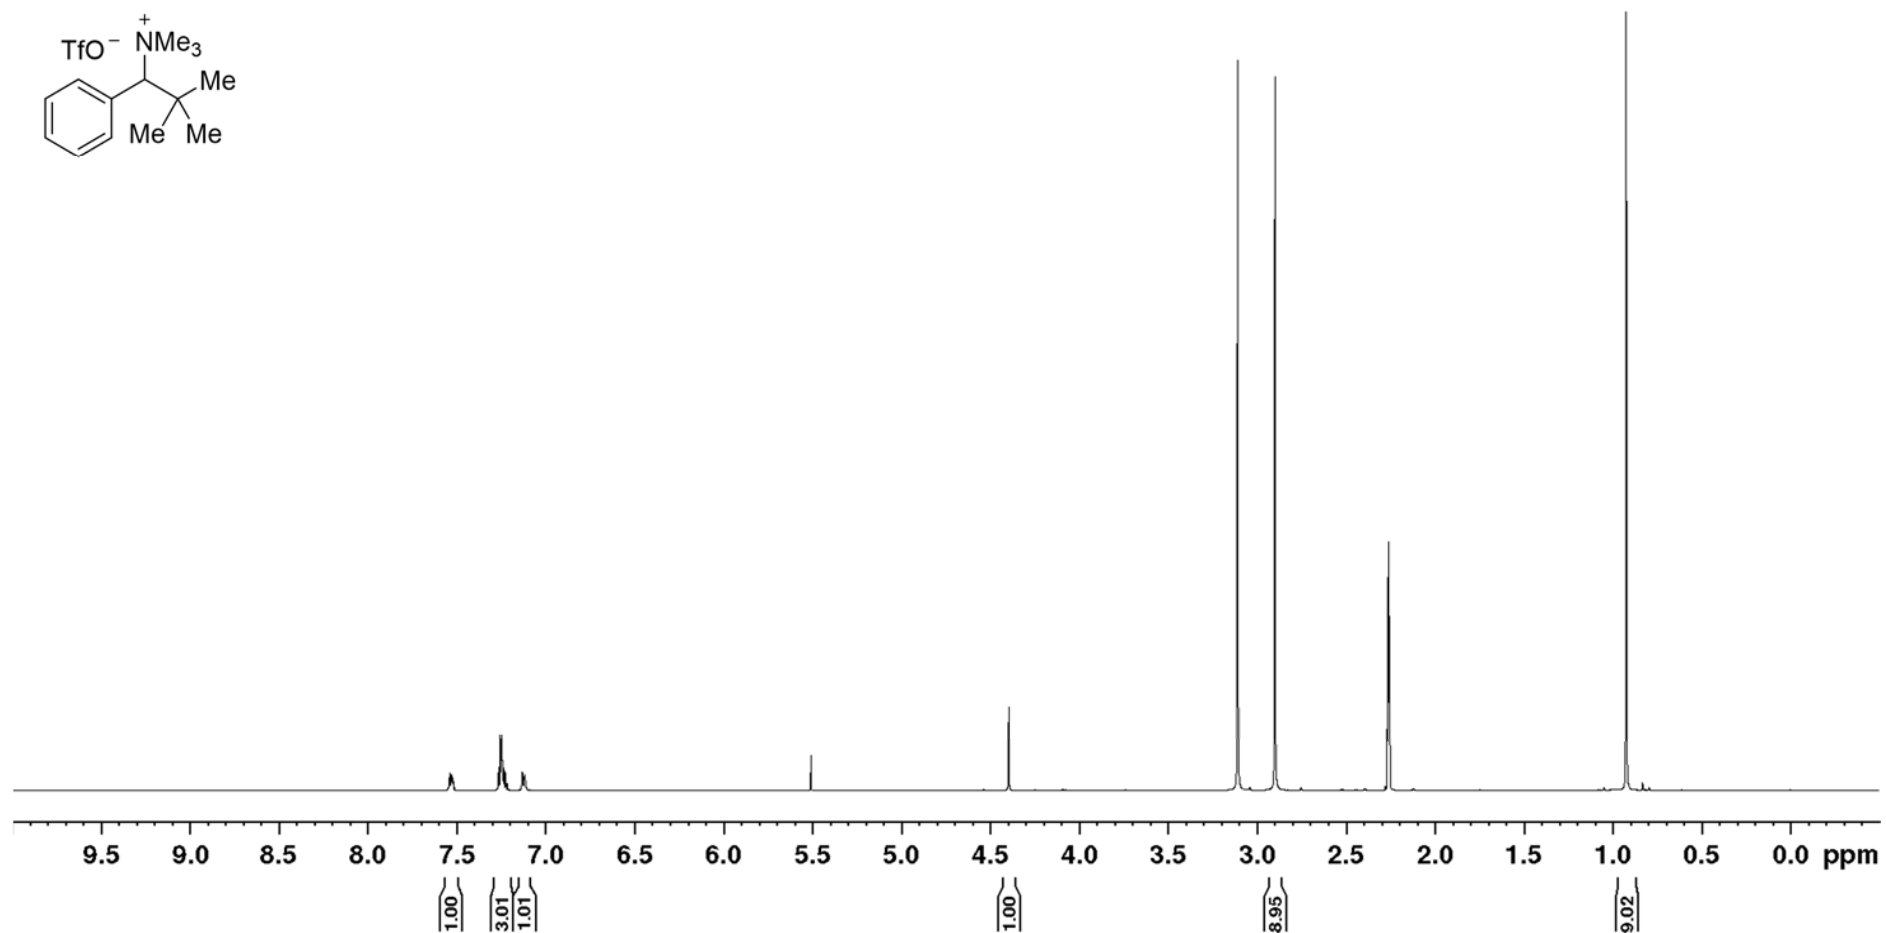



## SUPPORTING INFORMATION

 $^{13}\text{C}\{^1\text{H}\}$  NMR (101 MHz,  $\text{DMSO-}d_6$ ):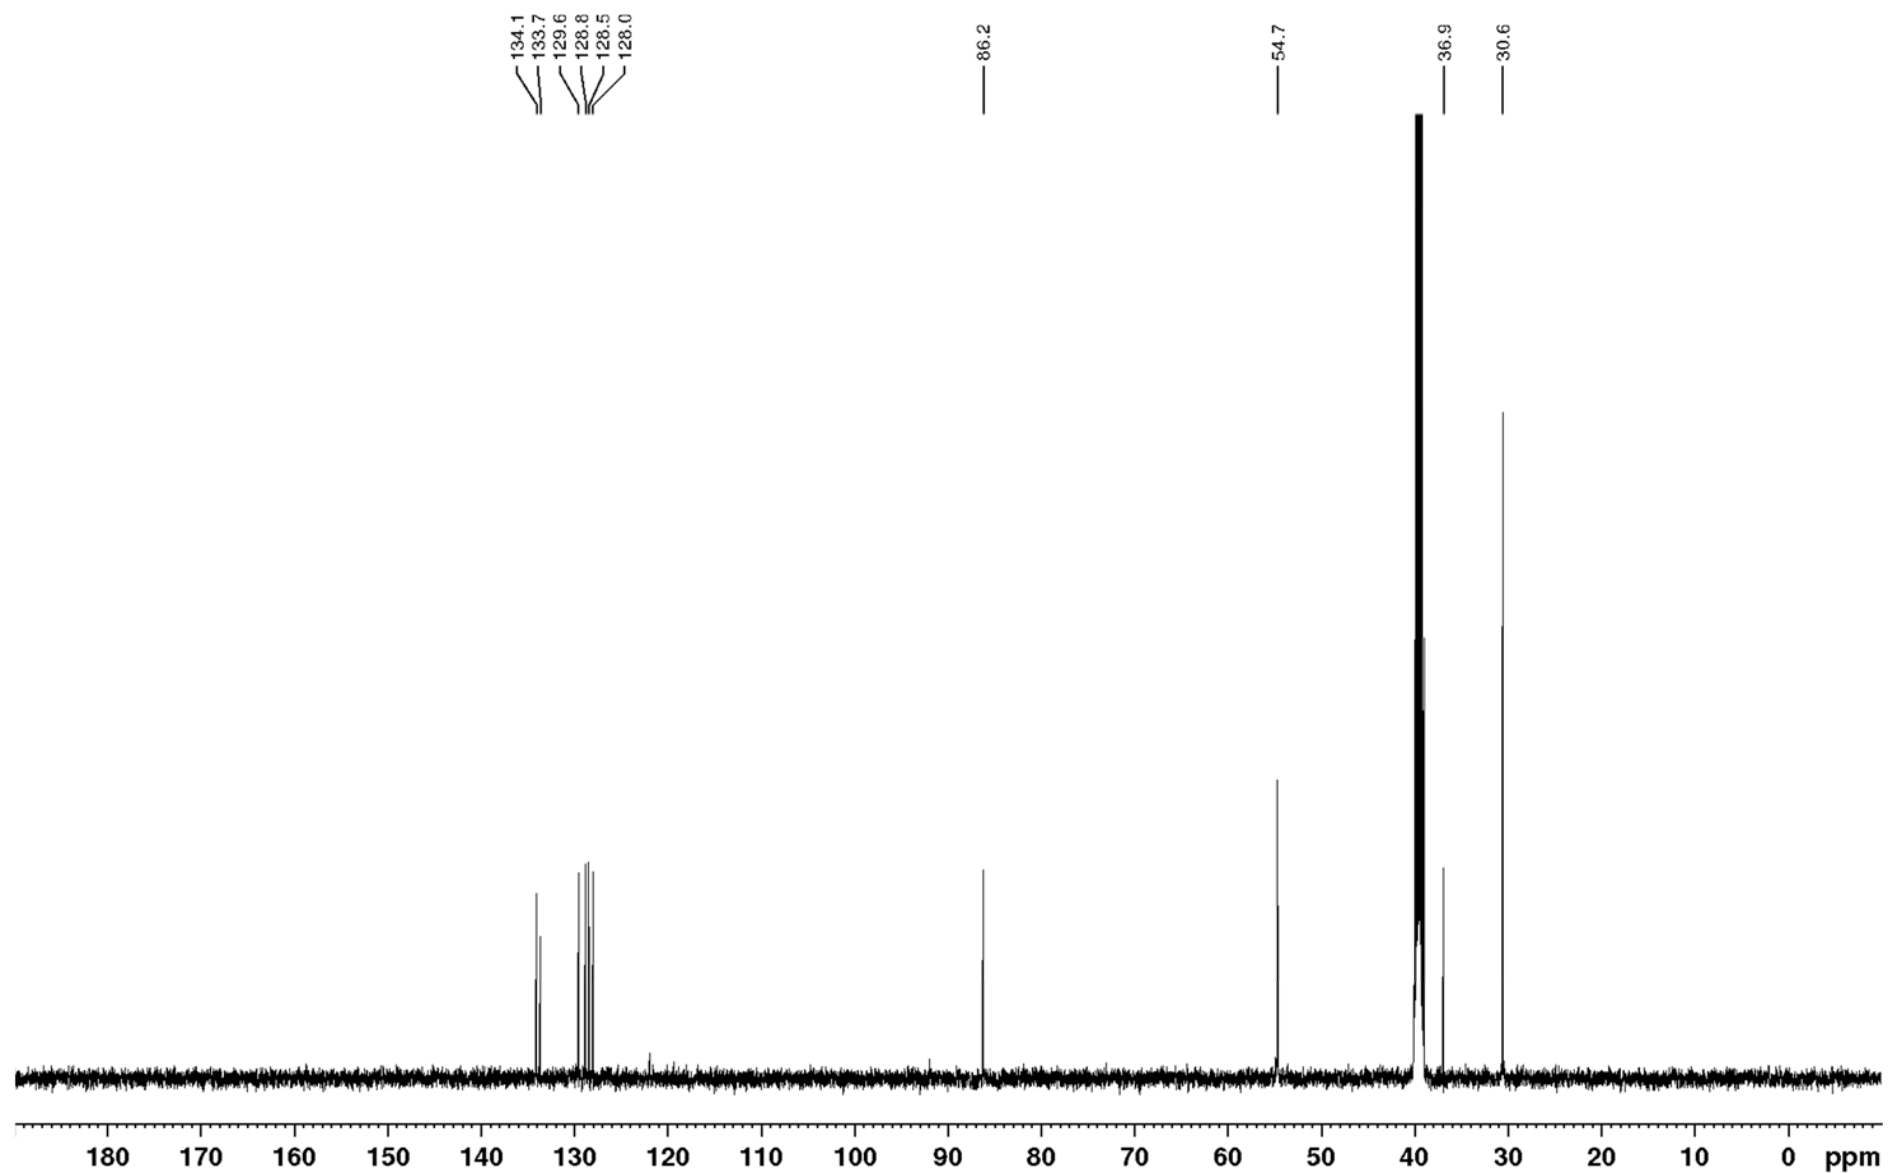

## SUPPORTING INFORMATION

 $^{13}\text{C}\{^{19}\text{F}\}$  DEPT NMR (176 MHz,  $\text{DMSO-}d_6$ ):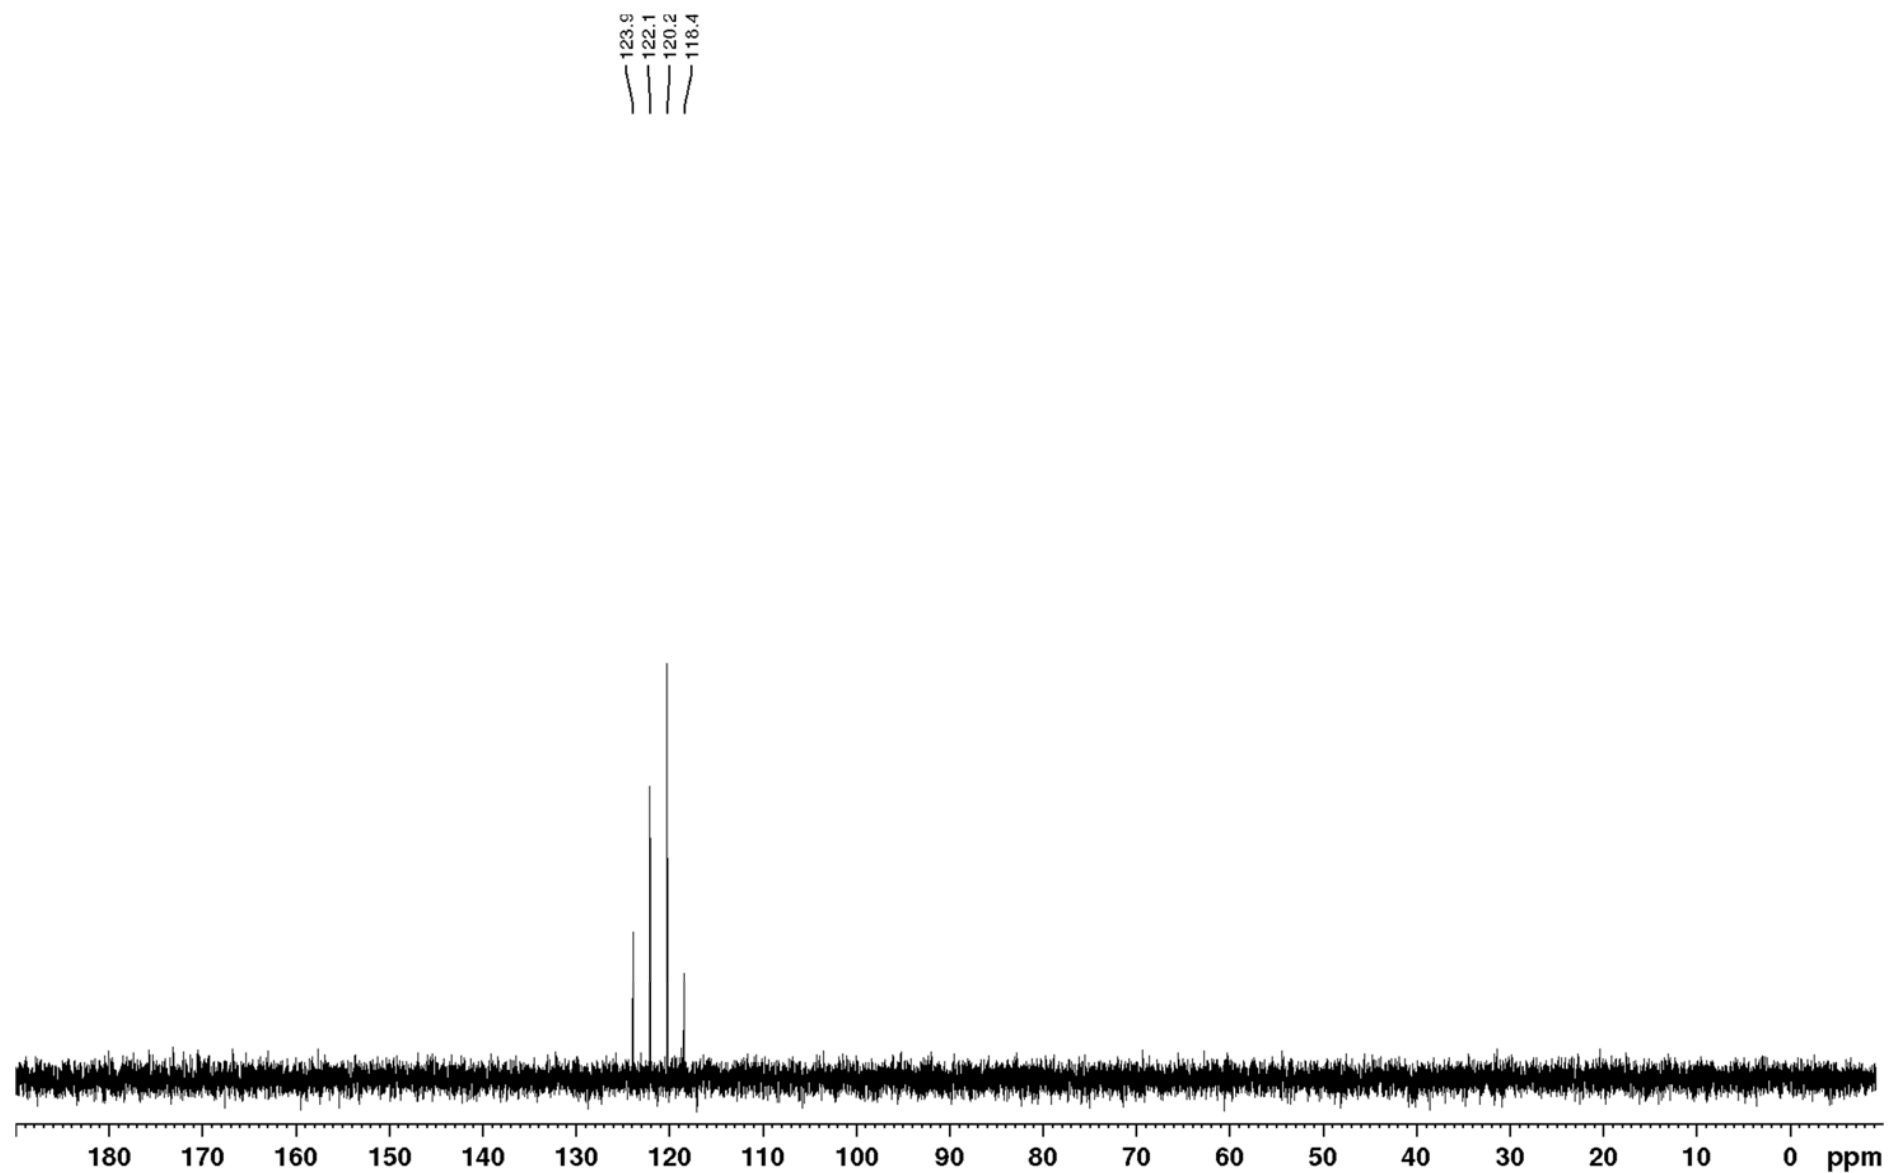

## SUPPORTING INFORMATION

 $^{19}\text{F}\{^1\text{H}\}$  NMR (659 MHz,  $\text{DMSO-}d_6$ ):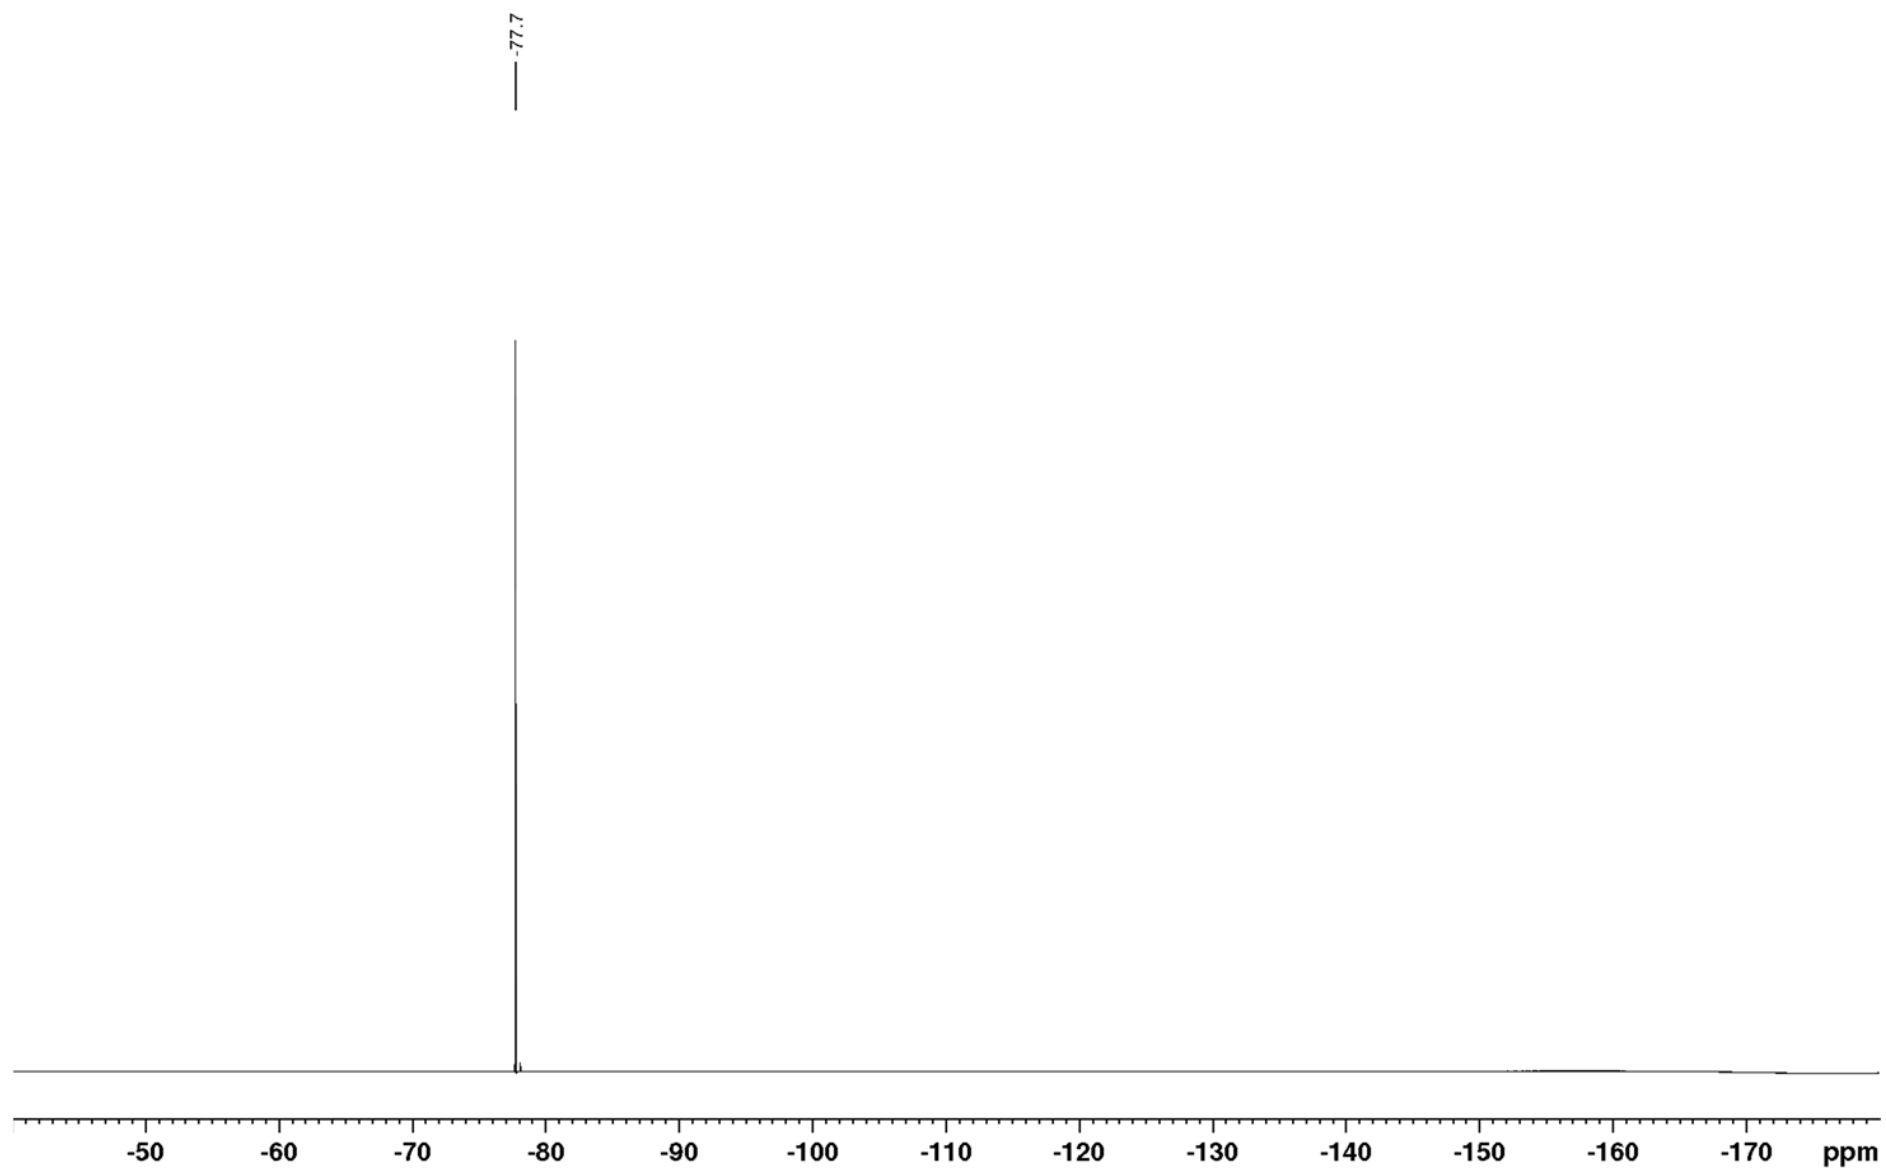

## SUPPORTING INFORMATION

***N,N,N*-Trimethyl-1-phenylmethanaminium trifluoromethanesulfonate (1u).**<sup>1</sup>H NMR (500 MHz, DMSO-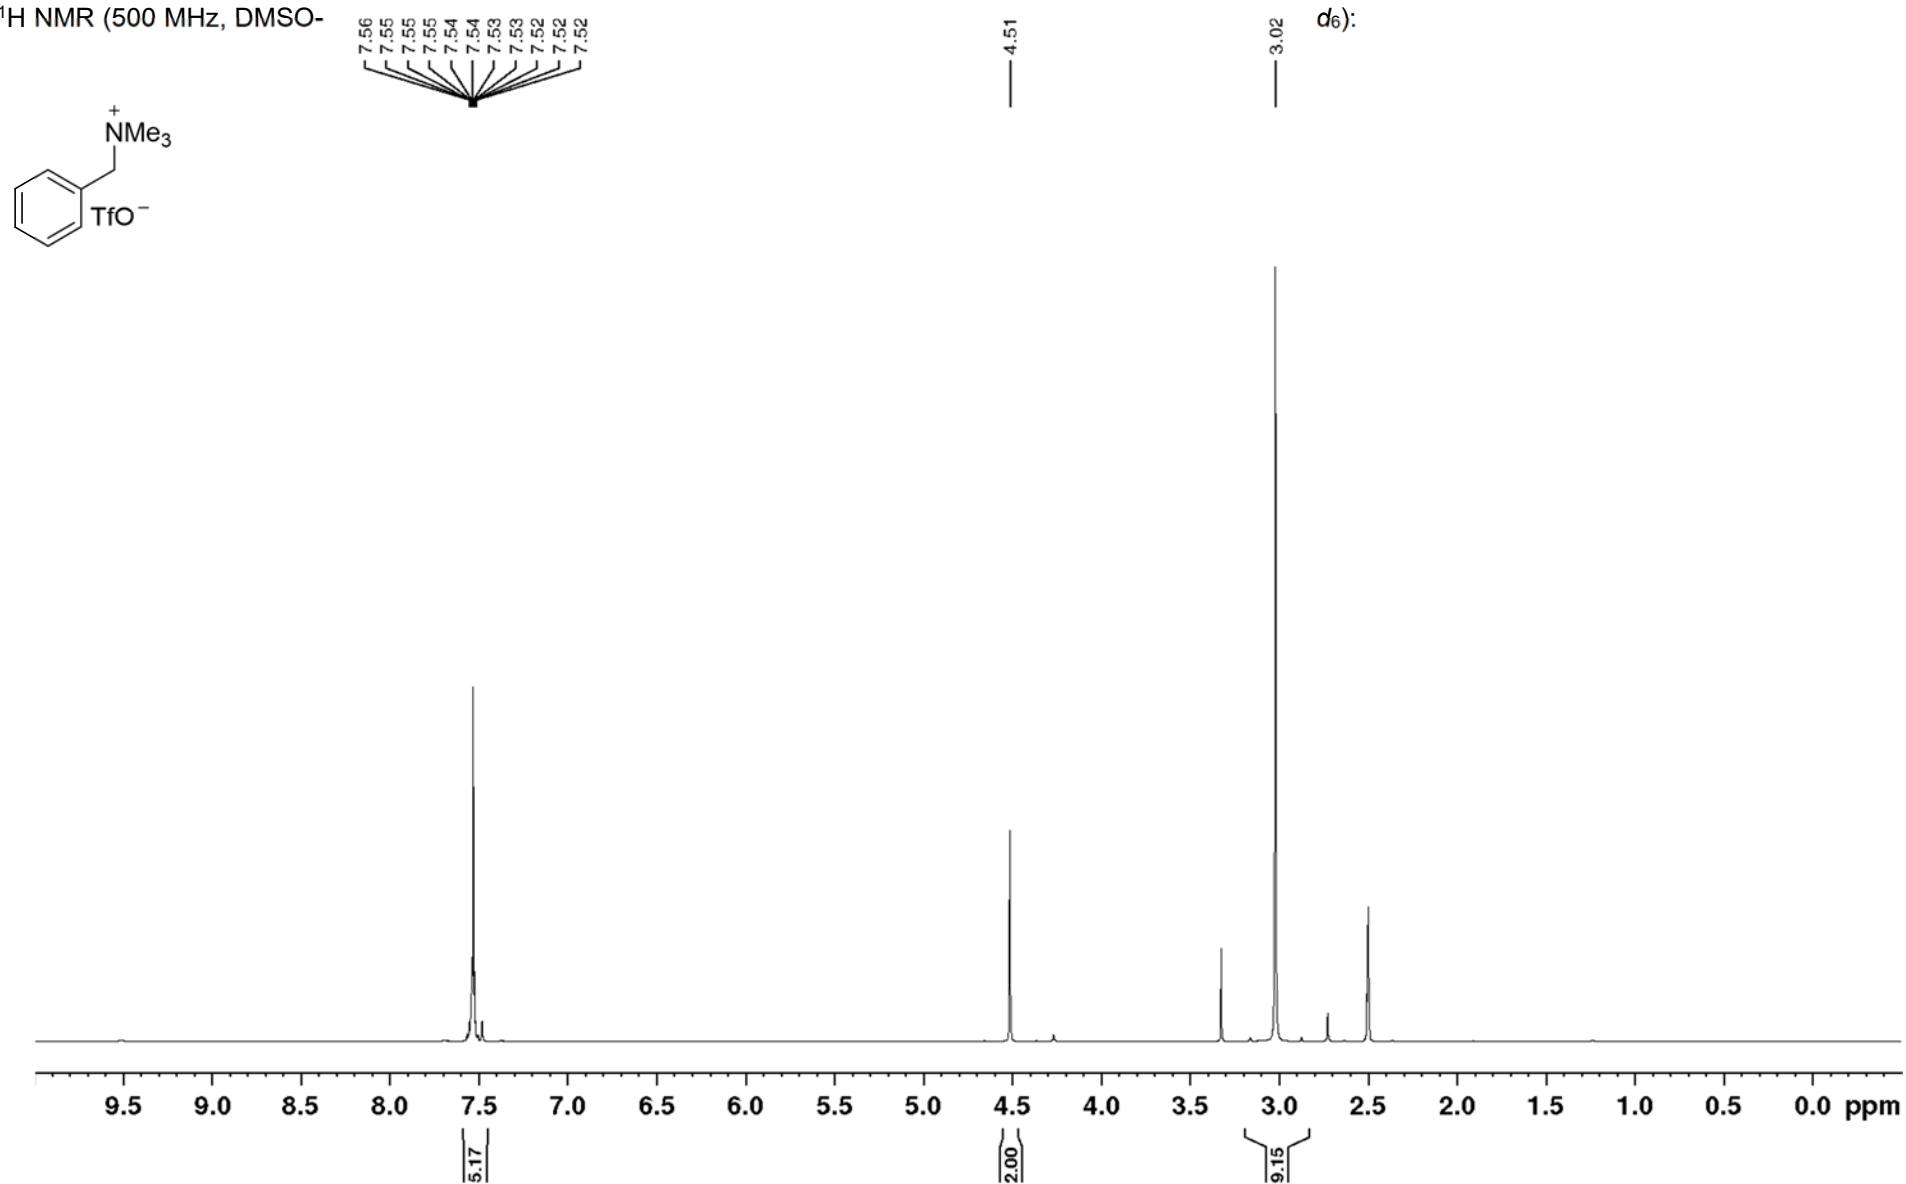

## SUPPORTING INFORMATION

 $^{13}\text{C}\{^1\text{H}\}$  NMR (126 MHz,  $\text{DMSO-}d_6$ ):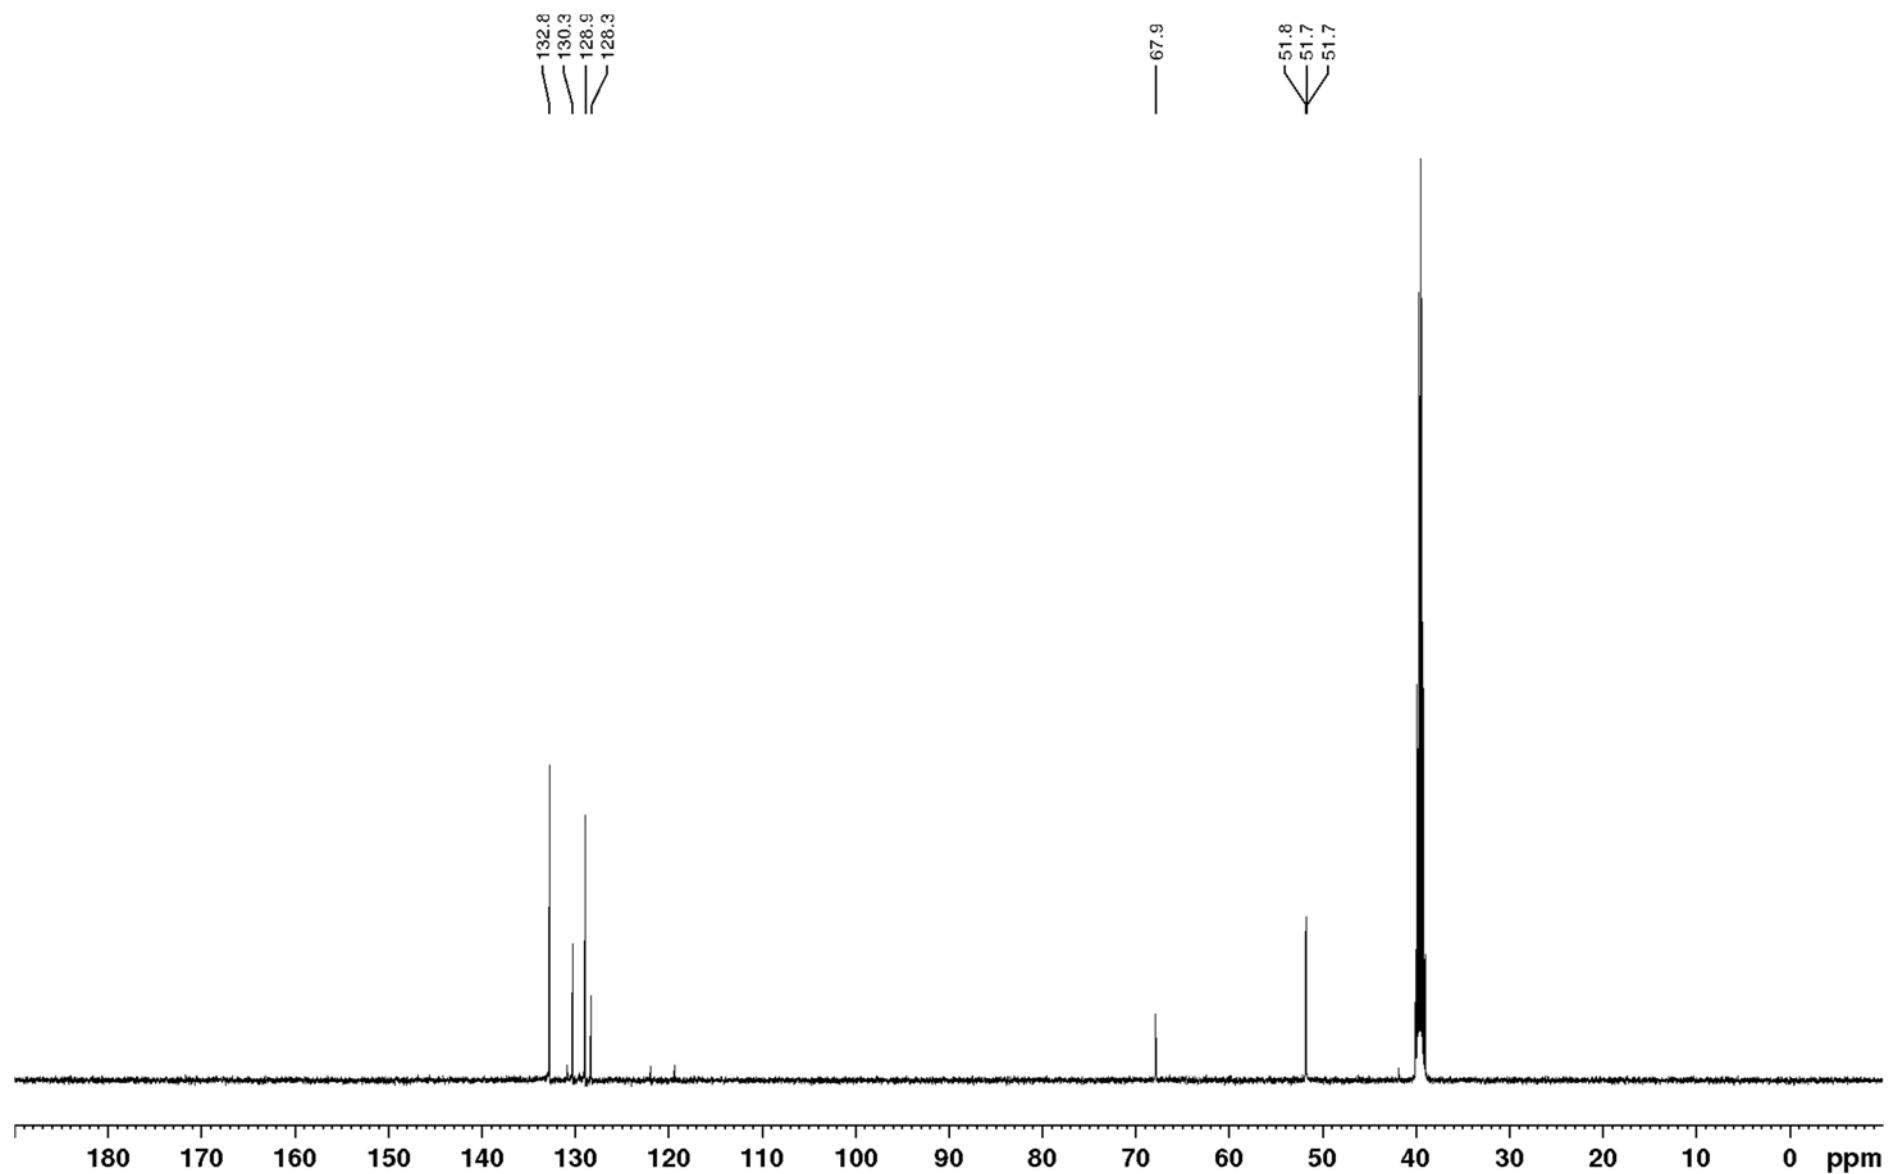

## SUPPORTING INFORMATION

 $^{13}\text{C}\{^{19}\text{F}\}$  DEPT NMR (126 MHz,  $\text{DMSO-}d_6$ ):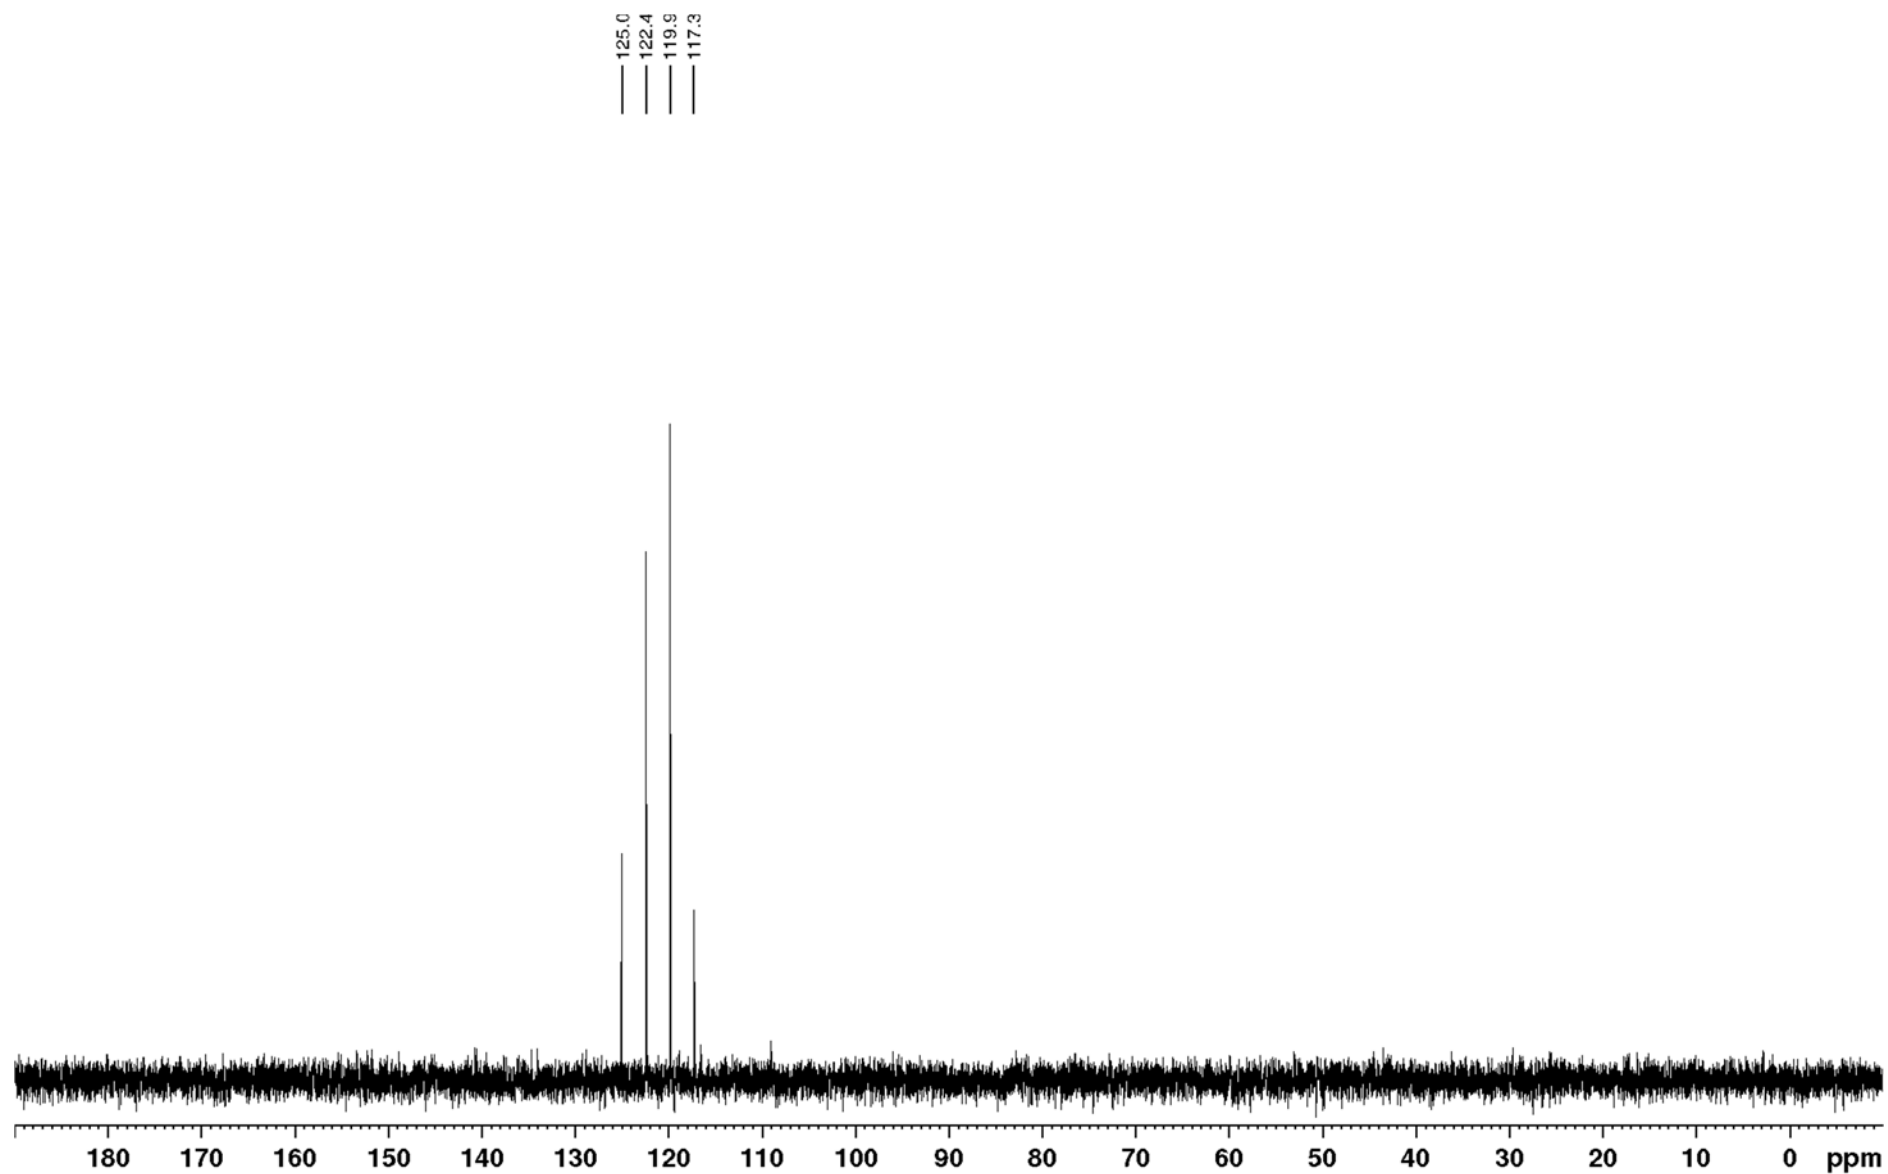

## SUPPORTING INFORMATION

 $^{19}\text{F}\{^1\text{H}\}$  NMR (471 MHz,  $\text{DMSO}-d_6$ ):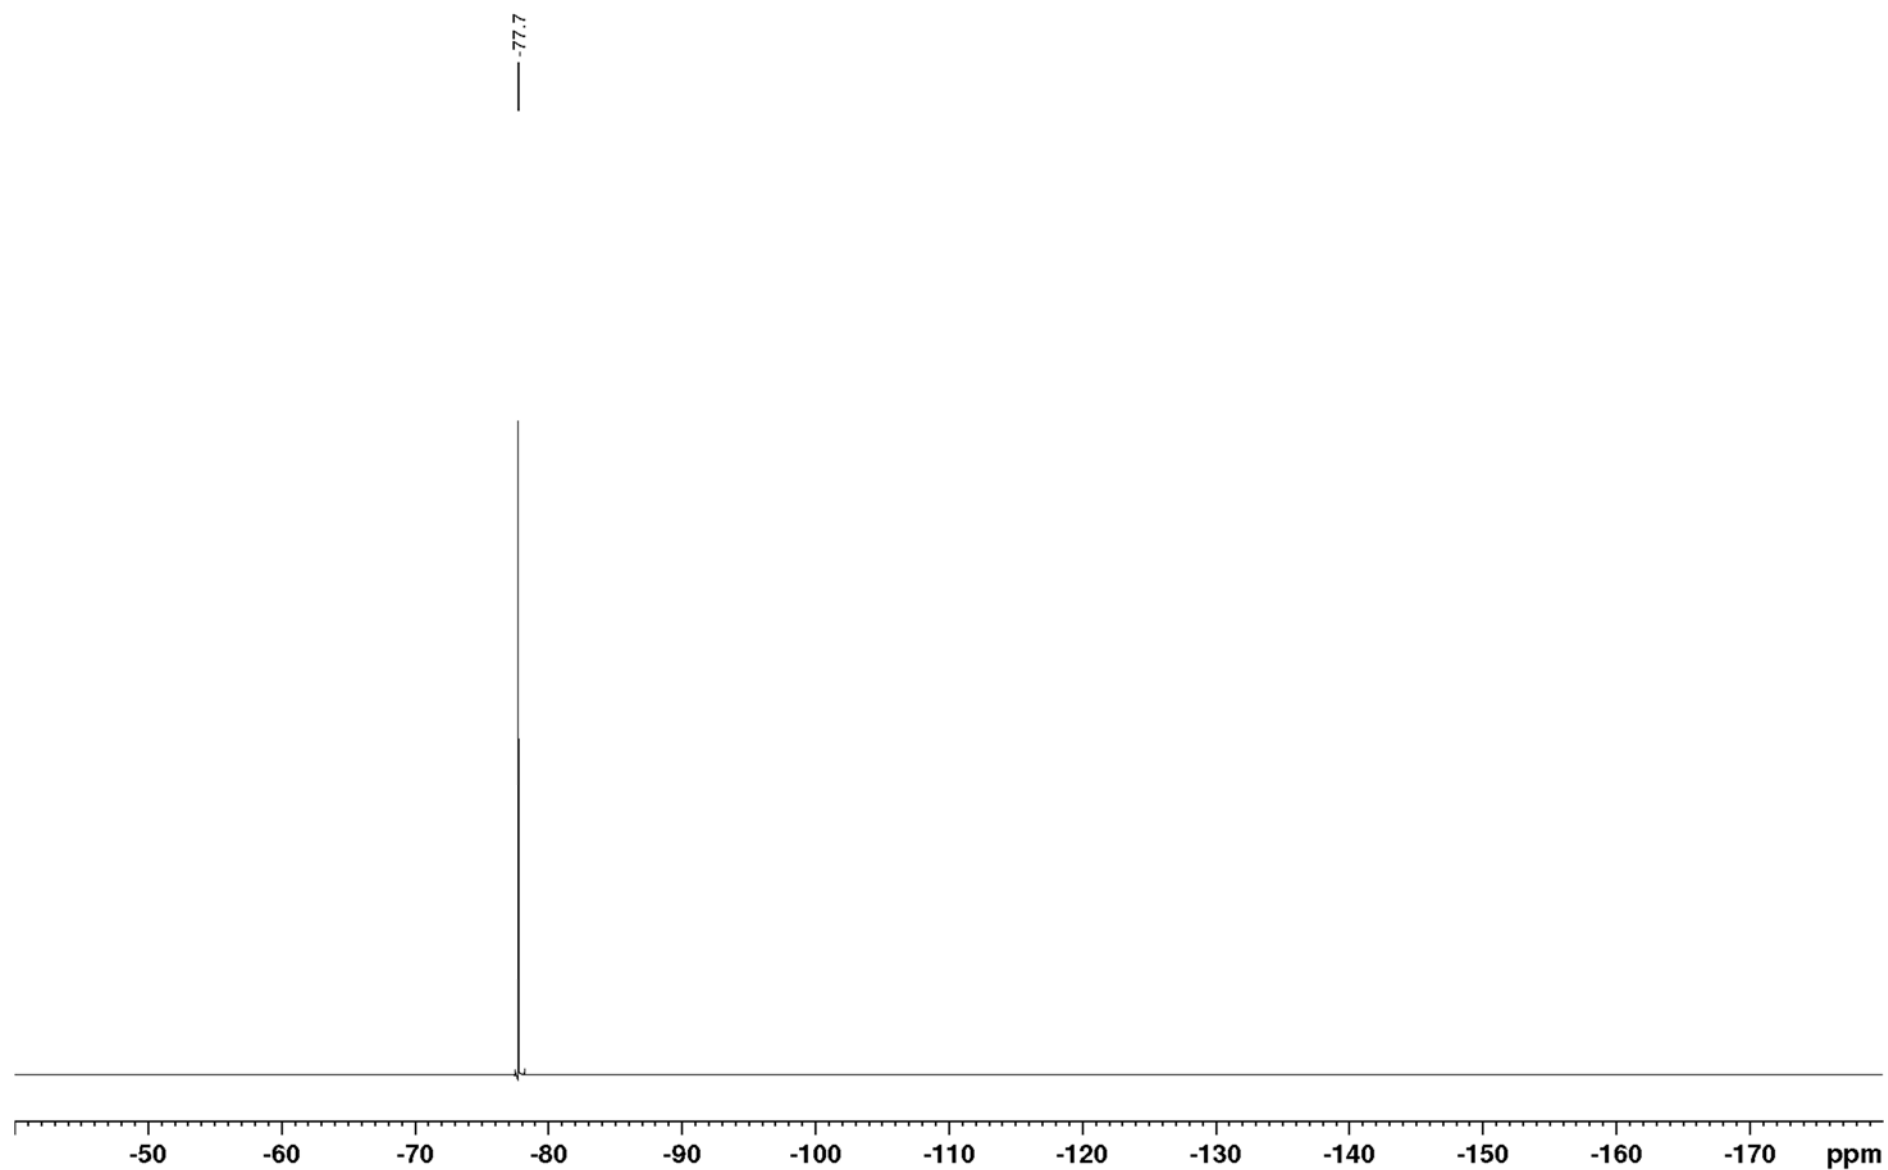

## SUPPORTING INFORMATION

***N,N,N*-Trimethyl-2-phenylpropan-2-aminium trifluoromethanesulfonate (1v).**

<sup>1</sup>H NMR (500 MHz,

7.78  
7.77  
7.77  
7.77  
7.76  
7.76  
7.76  
7.51  
7.51  
7.50  
7.50  
7.49

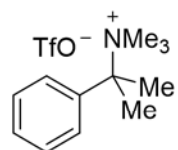

DMSO-*d*<sub>6</sub>):

2.92

1.90

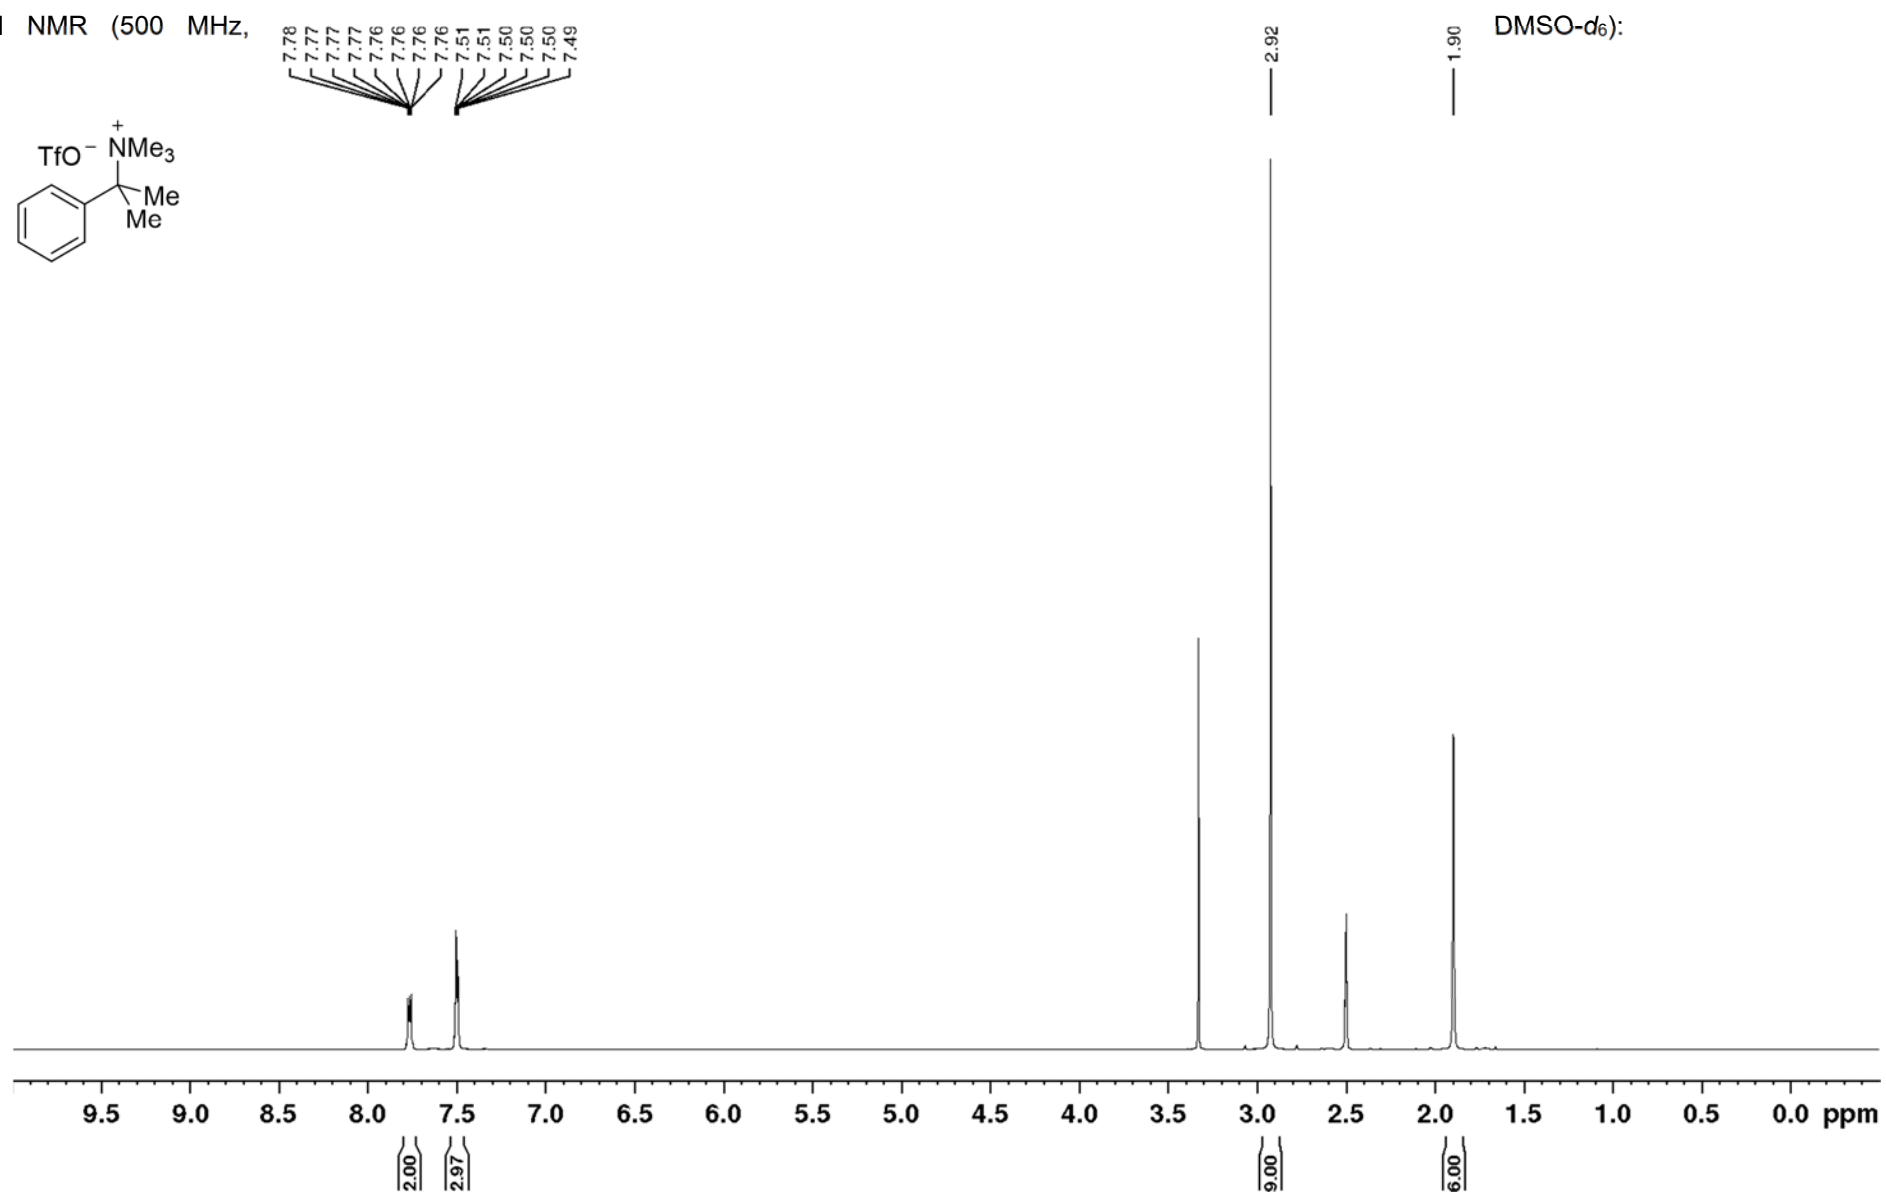



## SUPPORTING INFORMATION

 $^{13}\text{C}\{^1\text{H}\}$  NMR (126 MHz,  $\text{DMSO-}d_6$ ):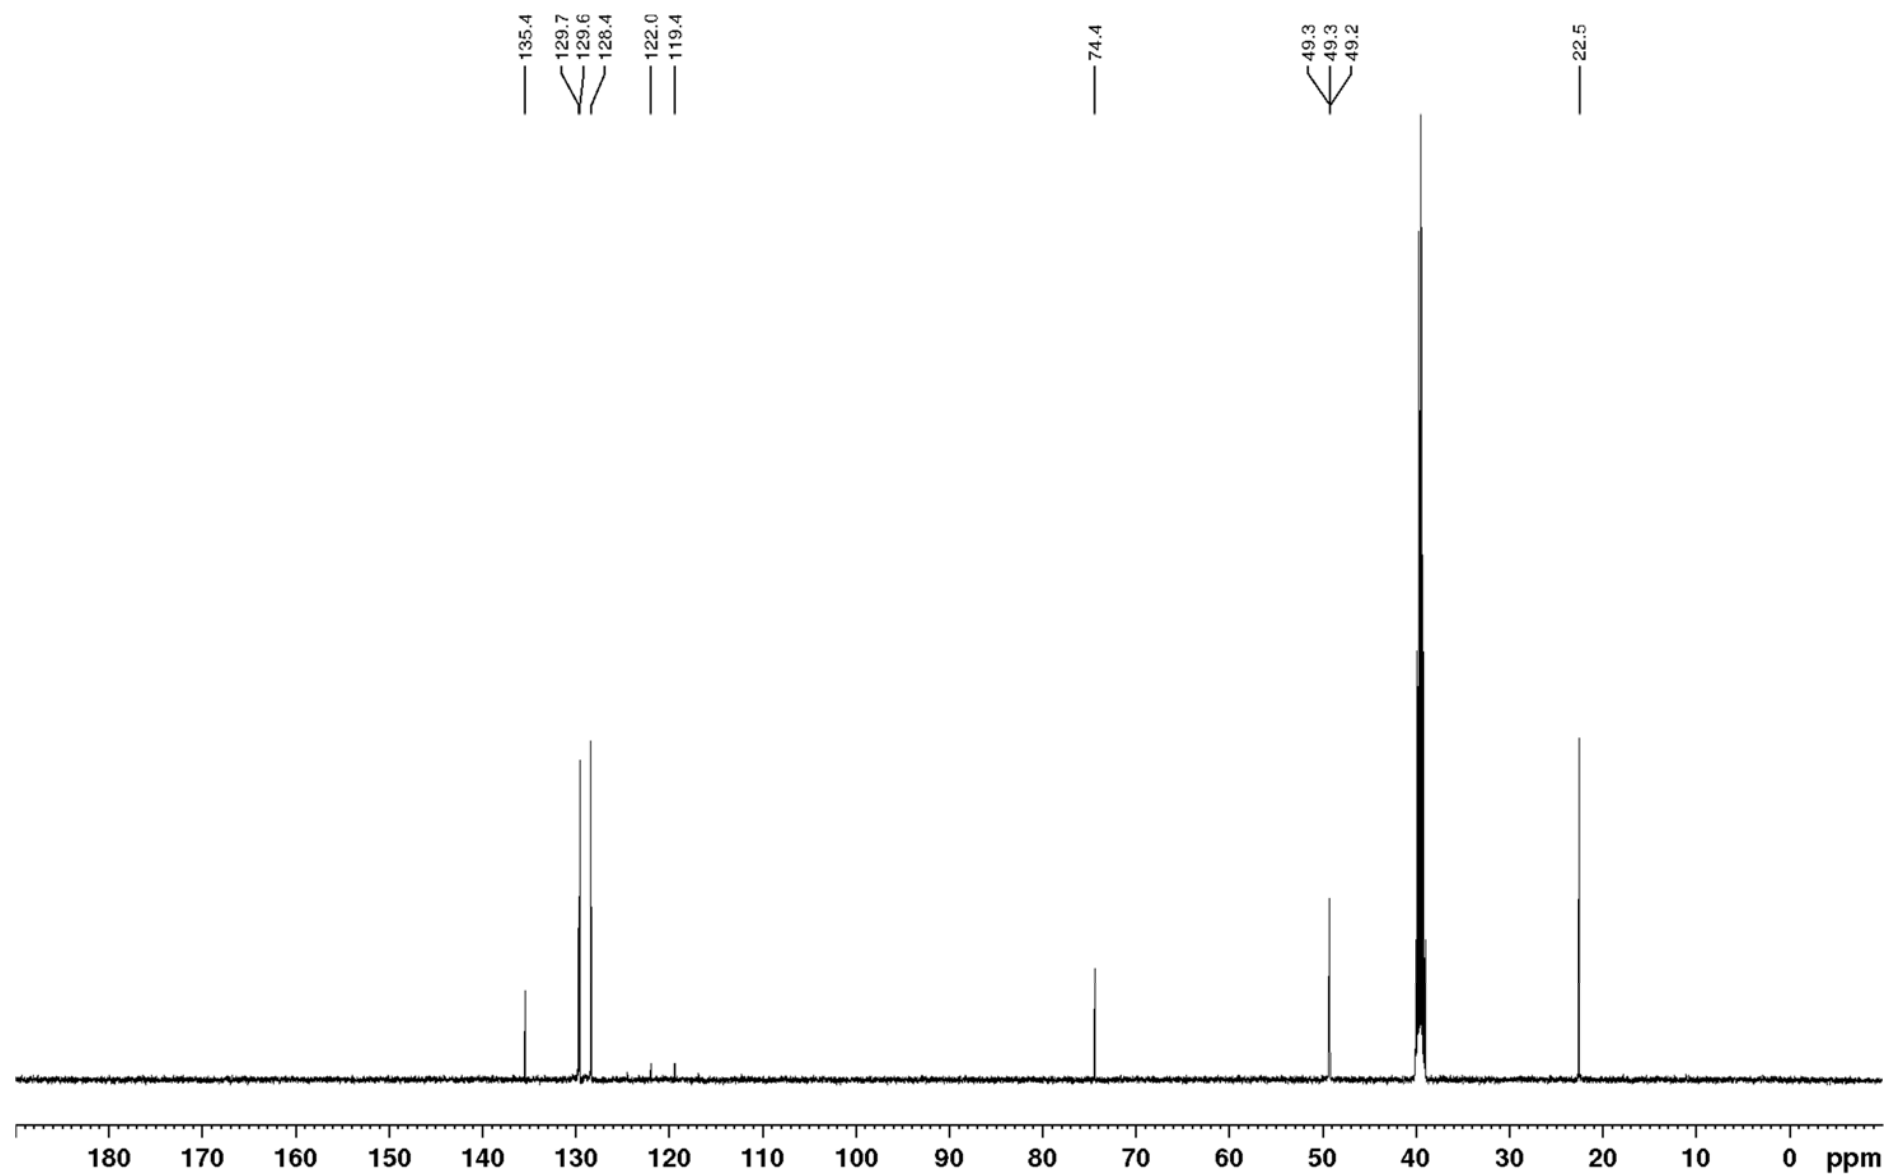

## SUPPORTING INFORMATION

 $^{13}\text{C}\{^{19}\text{F}\}$  DEPT NMR (176 MHz,  $\text{DMSO-}d_6$ ):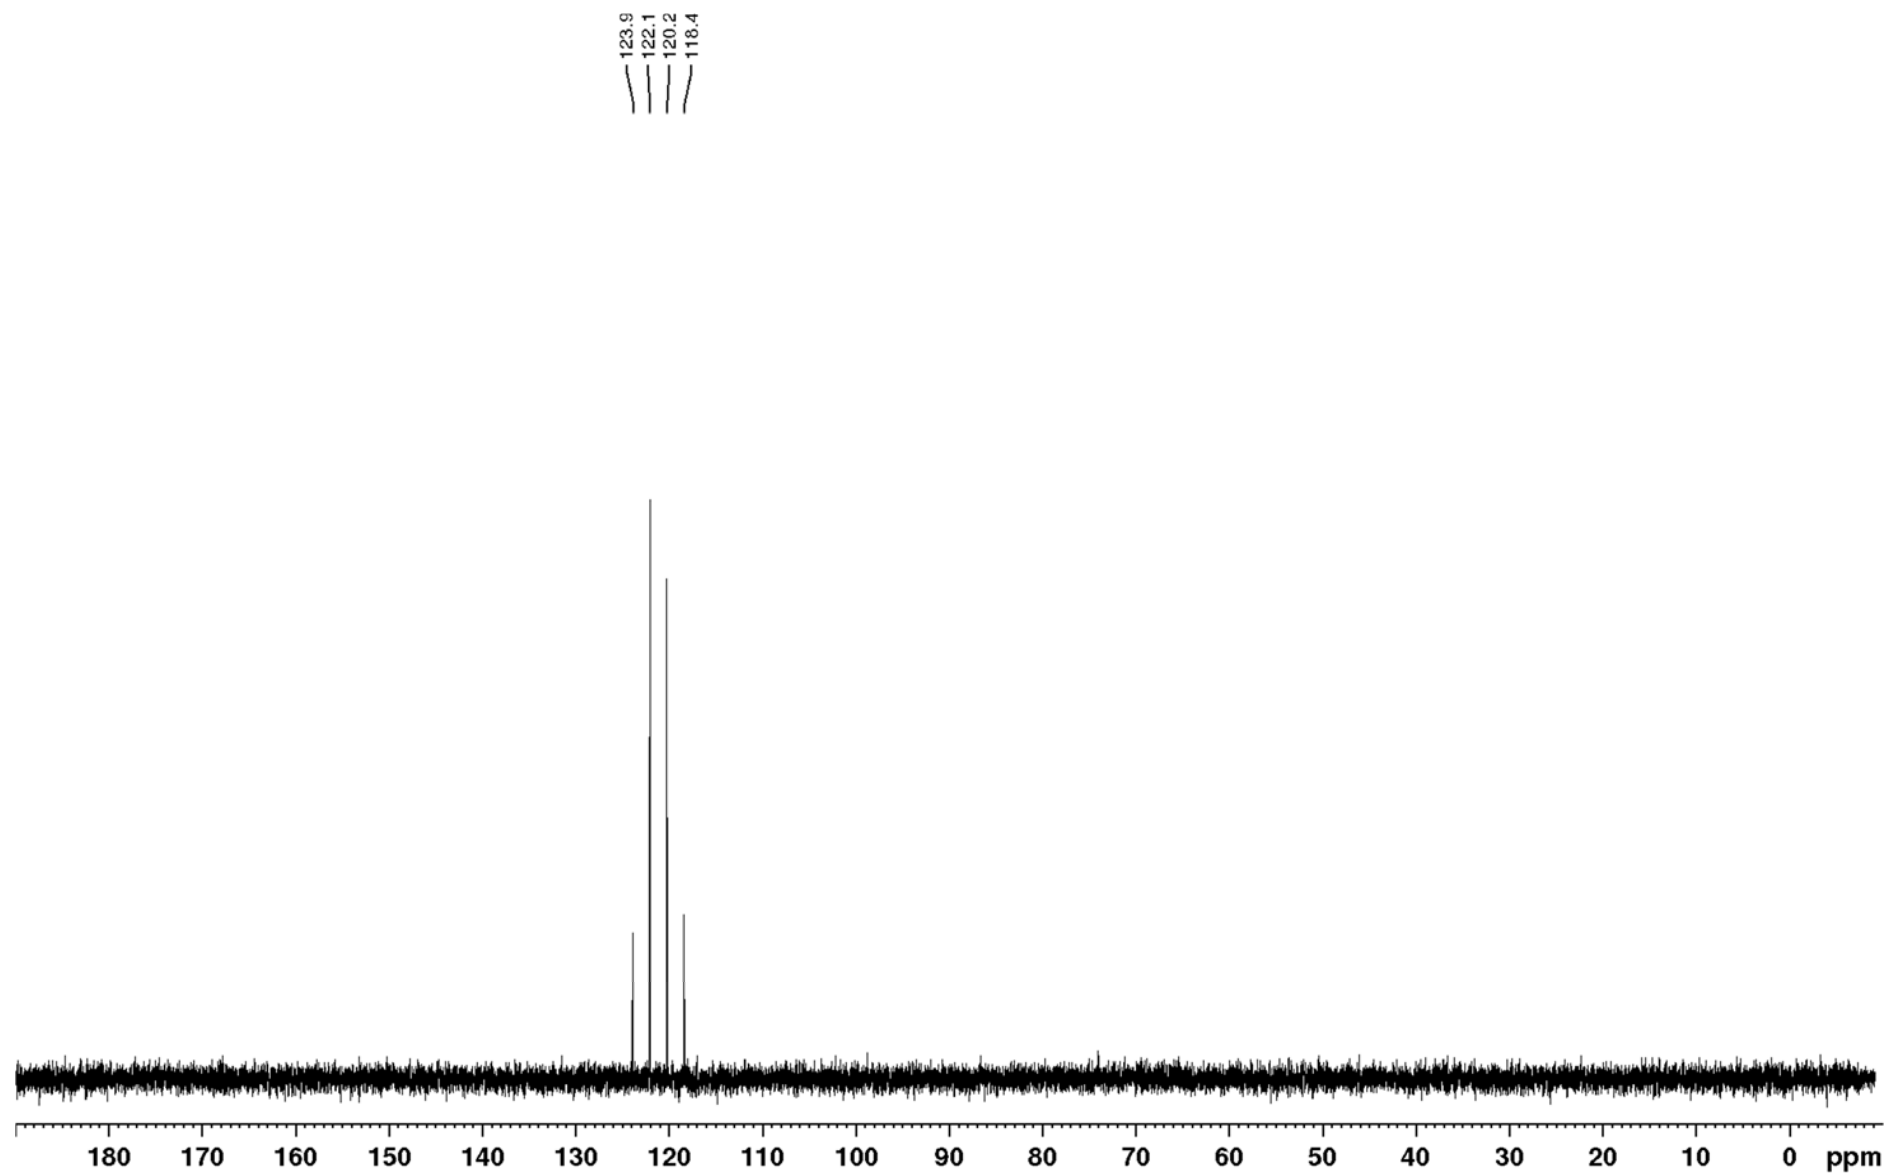

## SUPPORTING INFORMATION

 $^{19}\text{F}\{^1\text{H}\}$  NMR (471 MHz,  $\text{DMSO-}d_6$ ):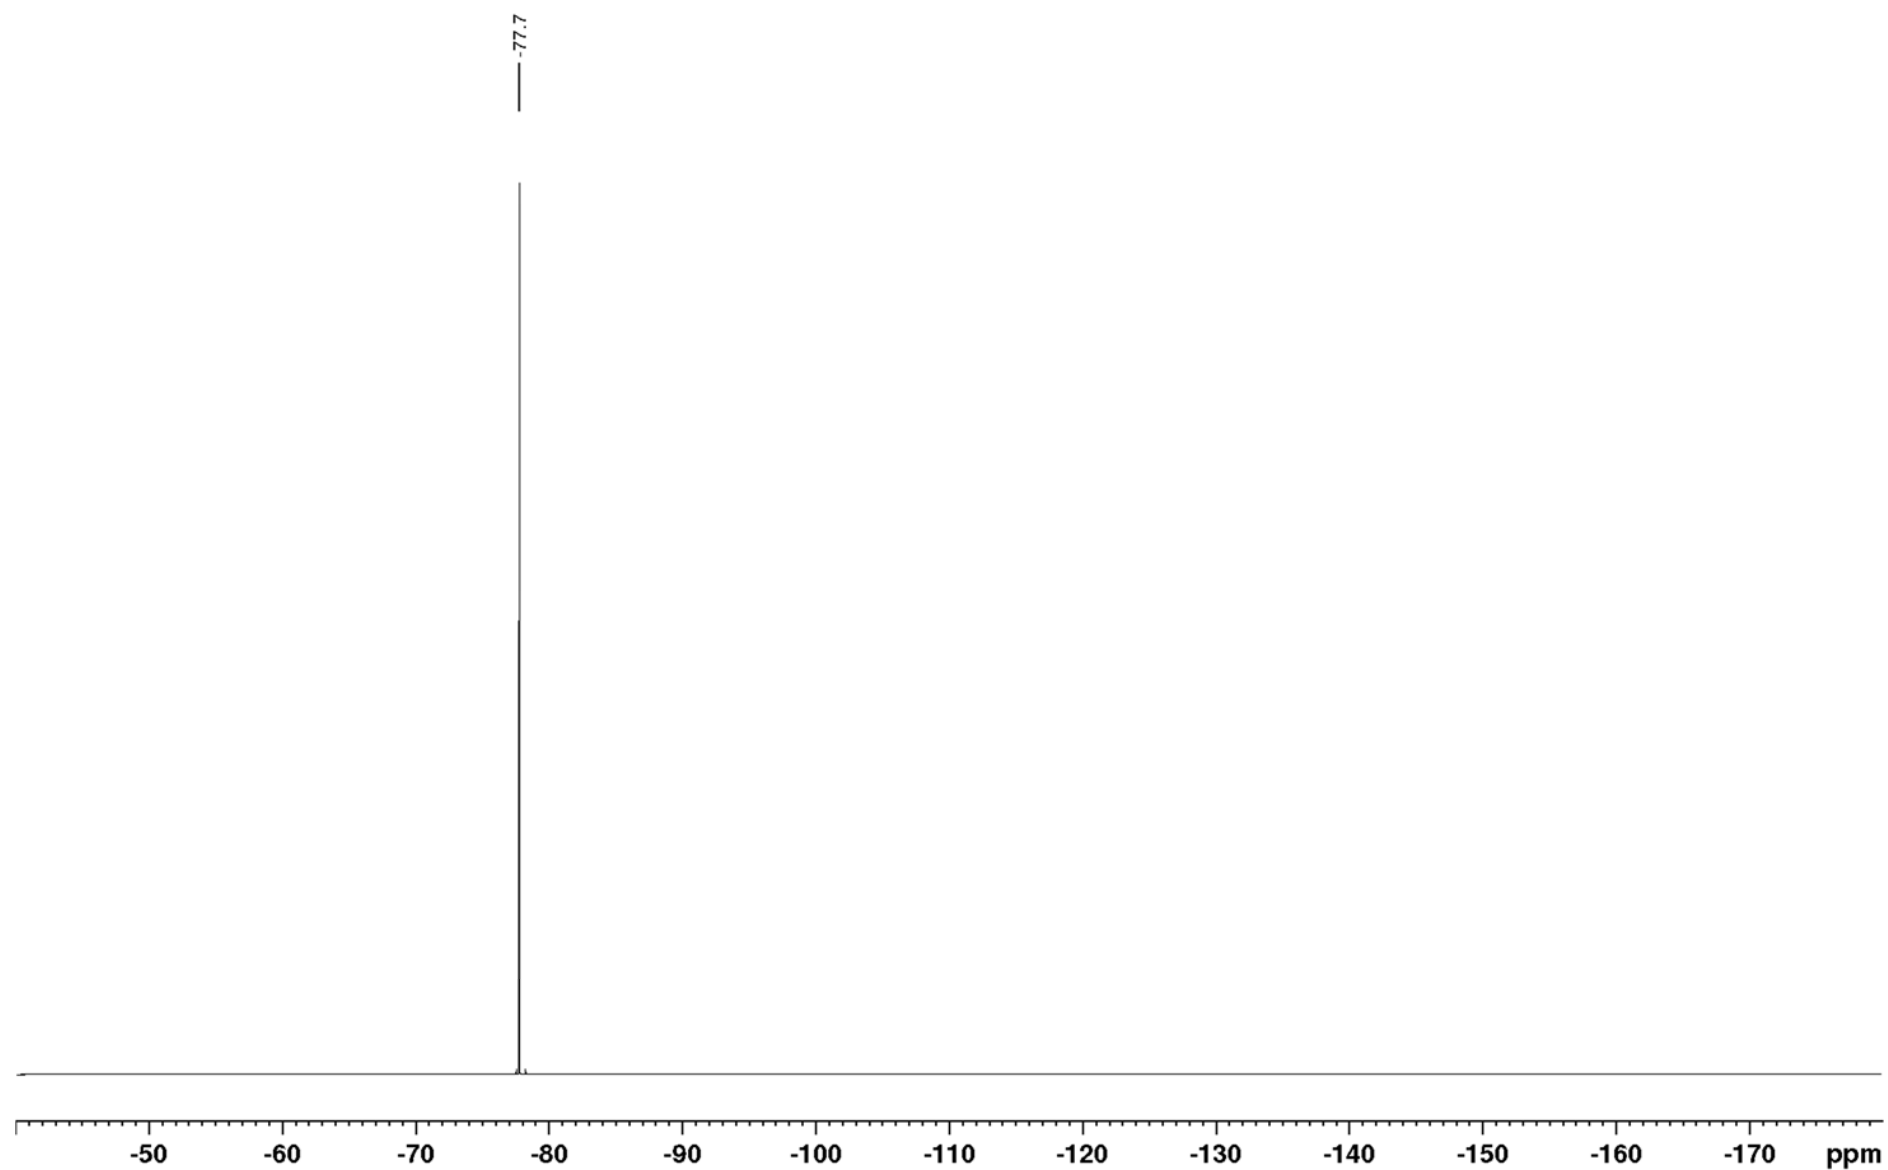

## SUPPORTING INFORMATION

***N,N,N*-Trimethyl-1,1-diphenylmethanaminium trifluoromethanesulfonate (1w).**

<sup>1</sup>H NMR (500 MHz,

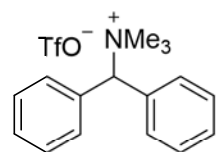

7.89  
7.88  
7.88  
7.87  
7.87  
7.54  
7.53  
7.53  
7.52  
7.52  
7.51  
7.51  
7.50  
7.50

5.92

3.08 DMSO-d<sub>6</sub>:

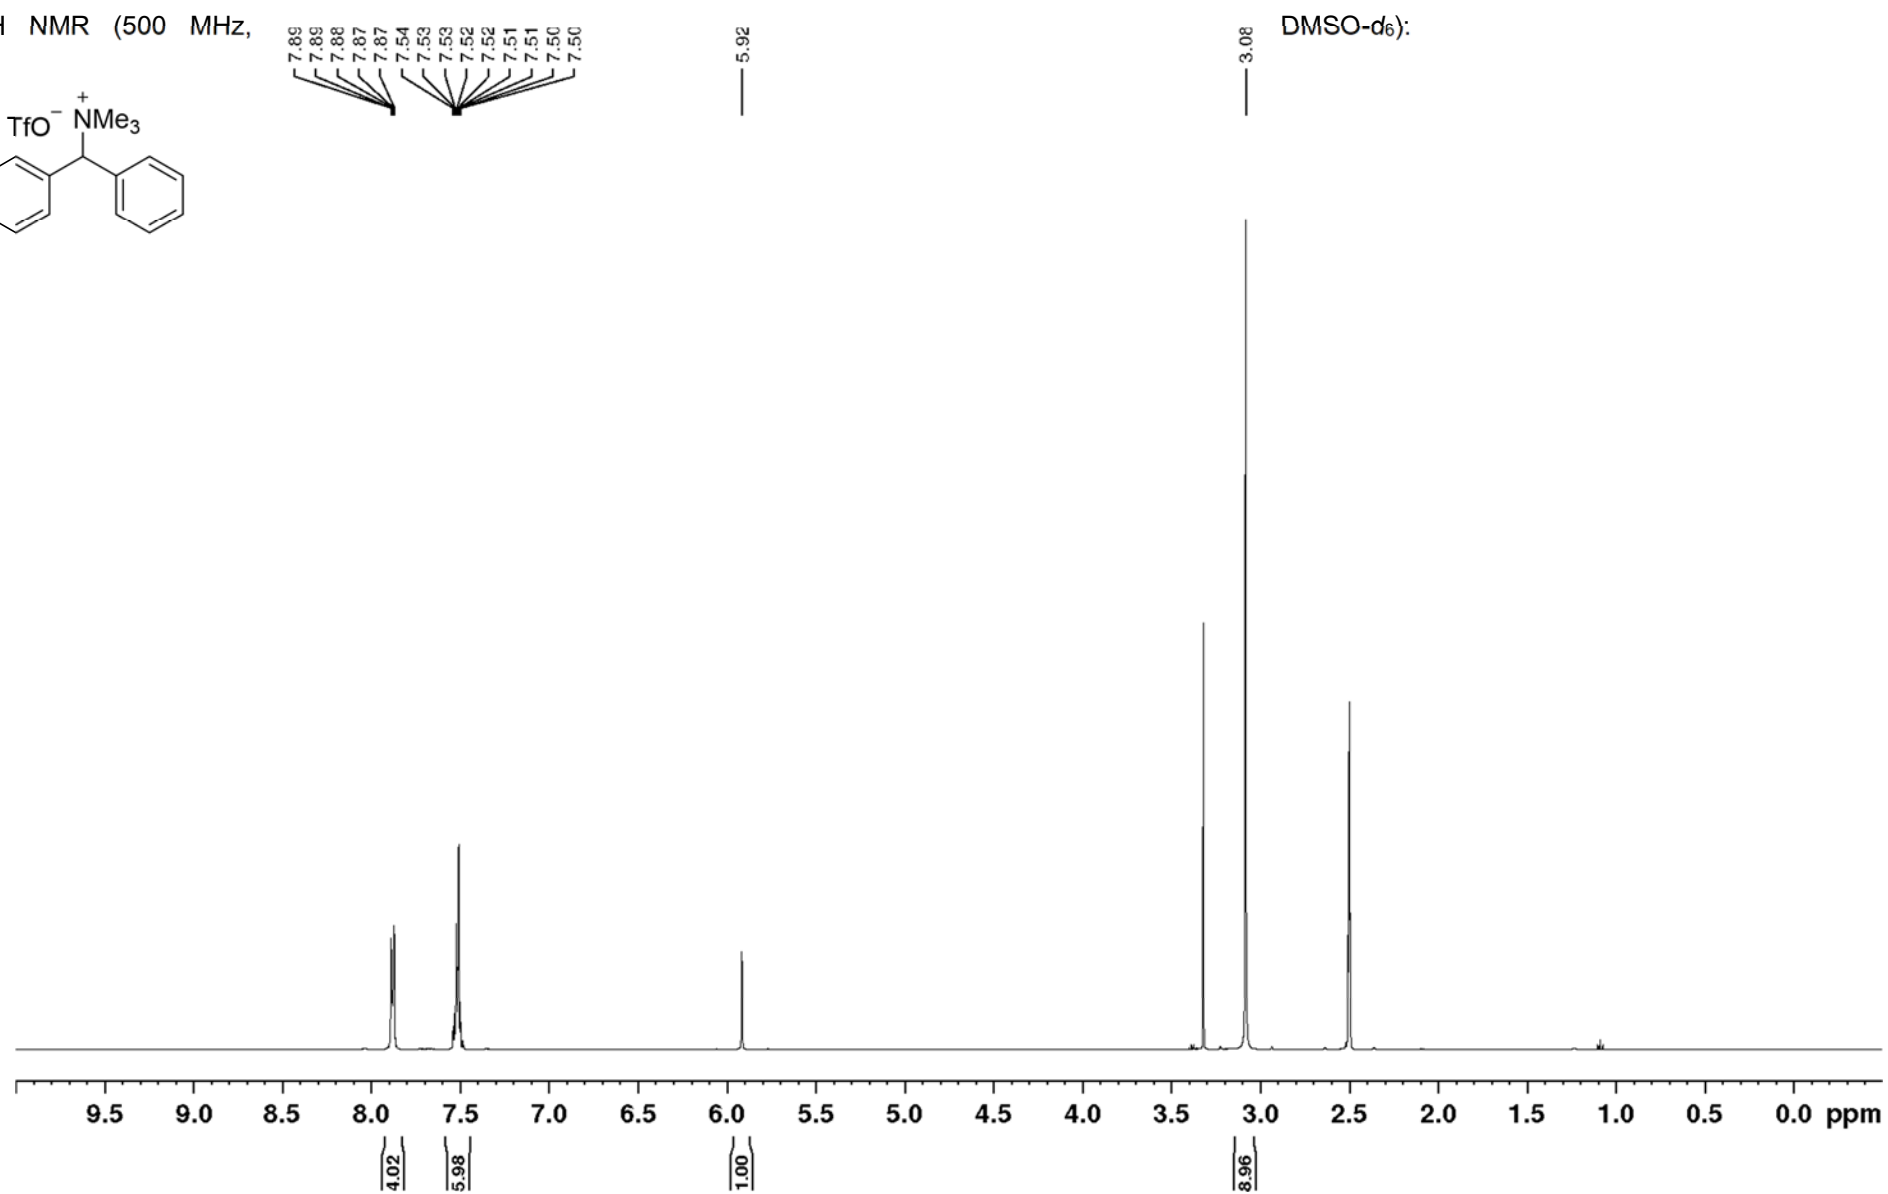

## SUPPORTING INFORMATION

 $^{13}\text{C}\{^1\text{H}\}$  NMR (126 MHz,  $\text{DMSO-}d_6$ ):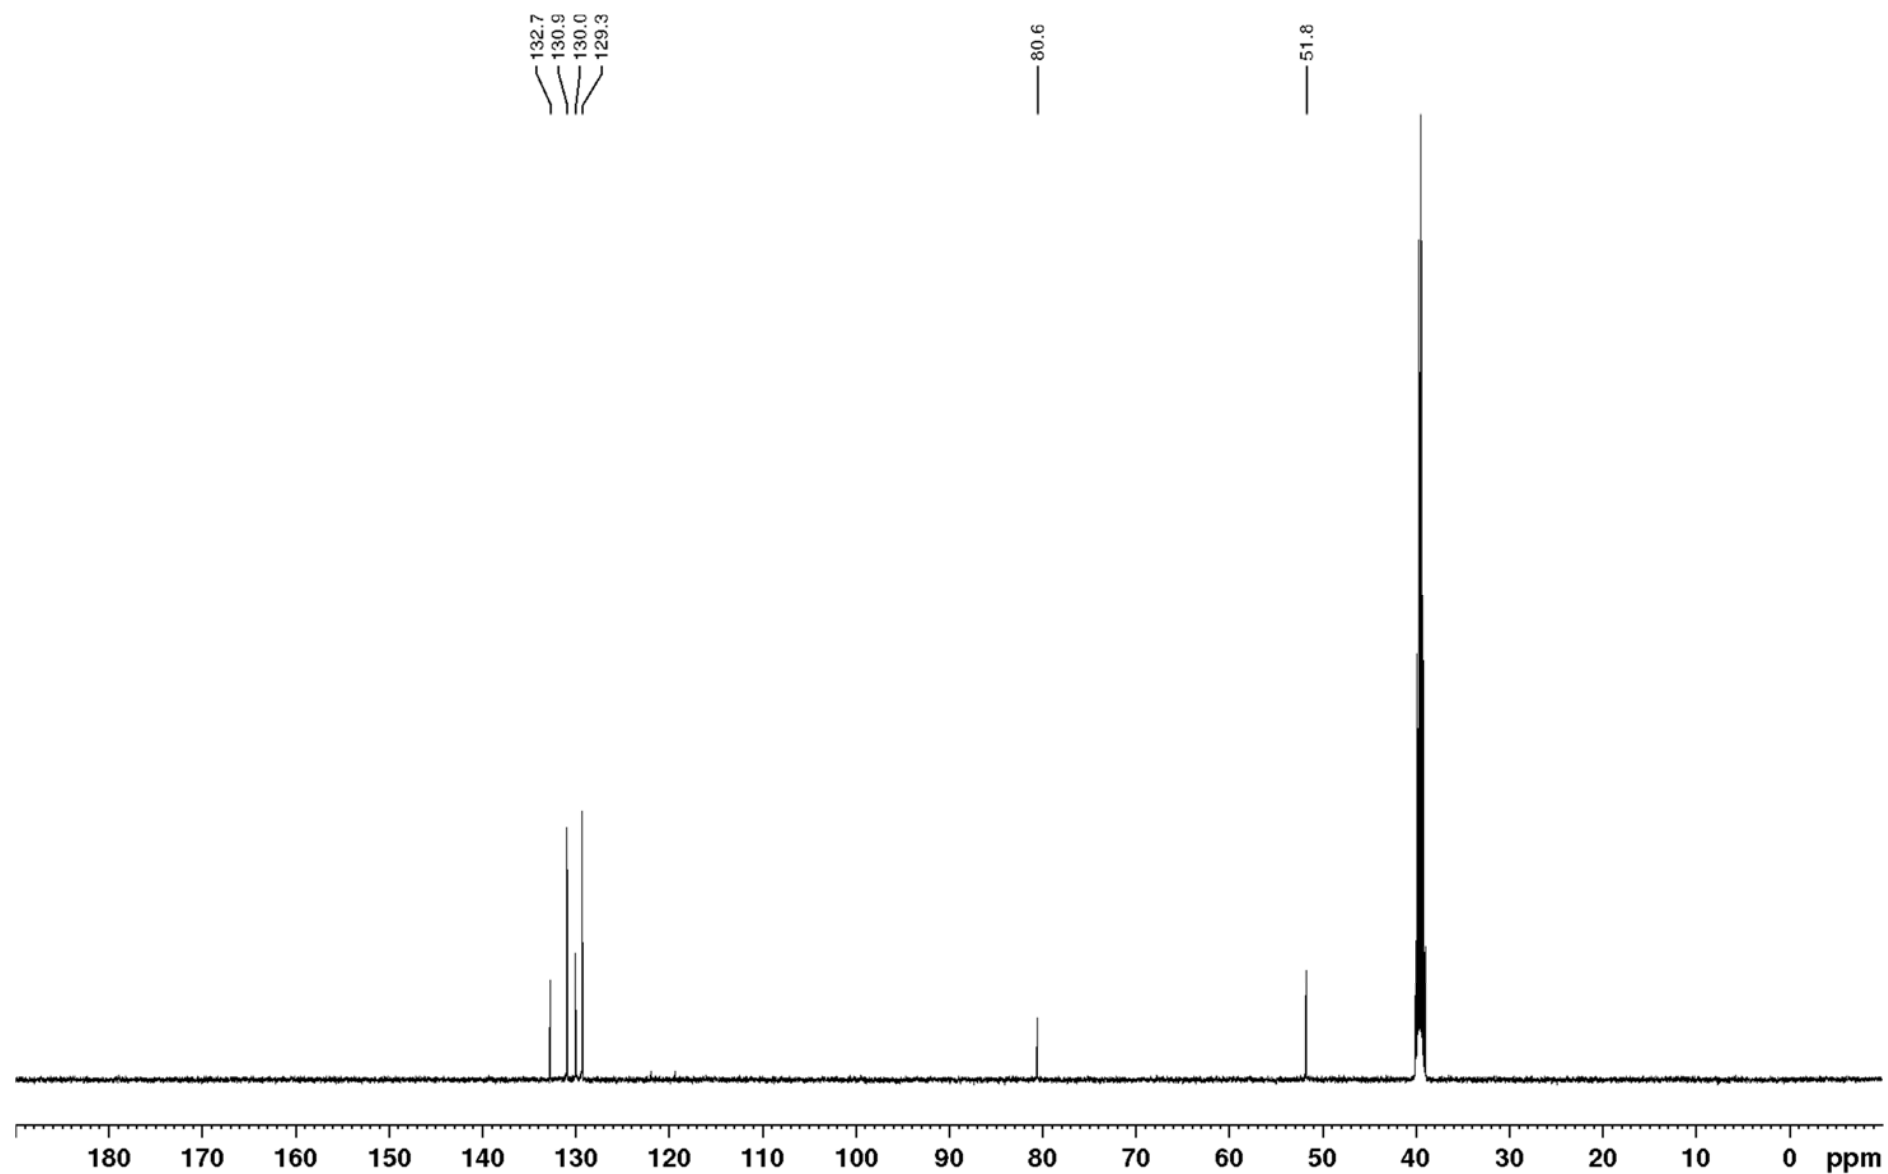

## SUPPORTING INFORMATION

 $^{13}\text{C}\{^{19}\text{F}\}$  DEPT NMR (126 MHz,  $\text{DMSO-}d_6$ ):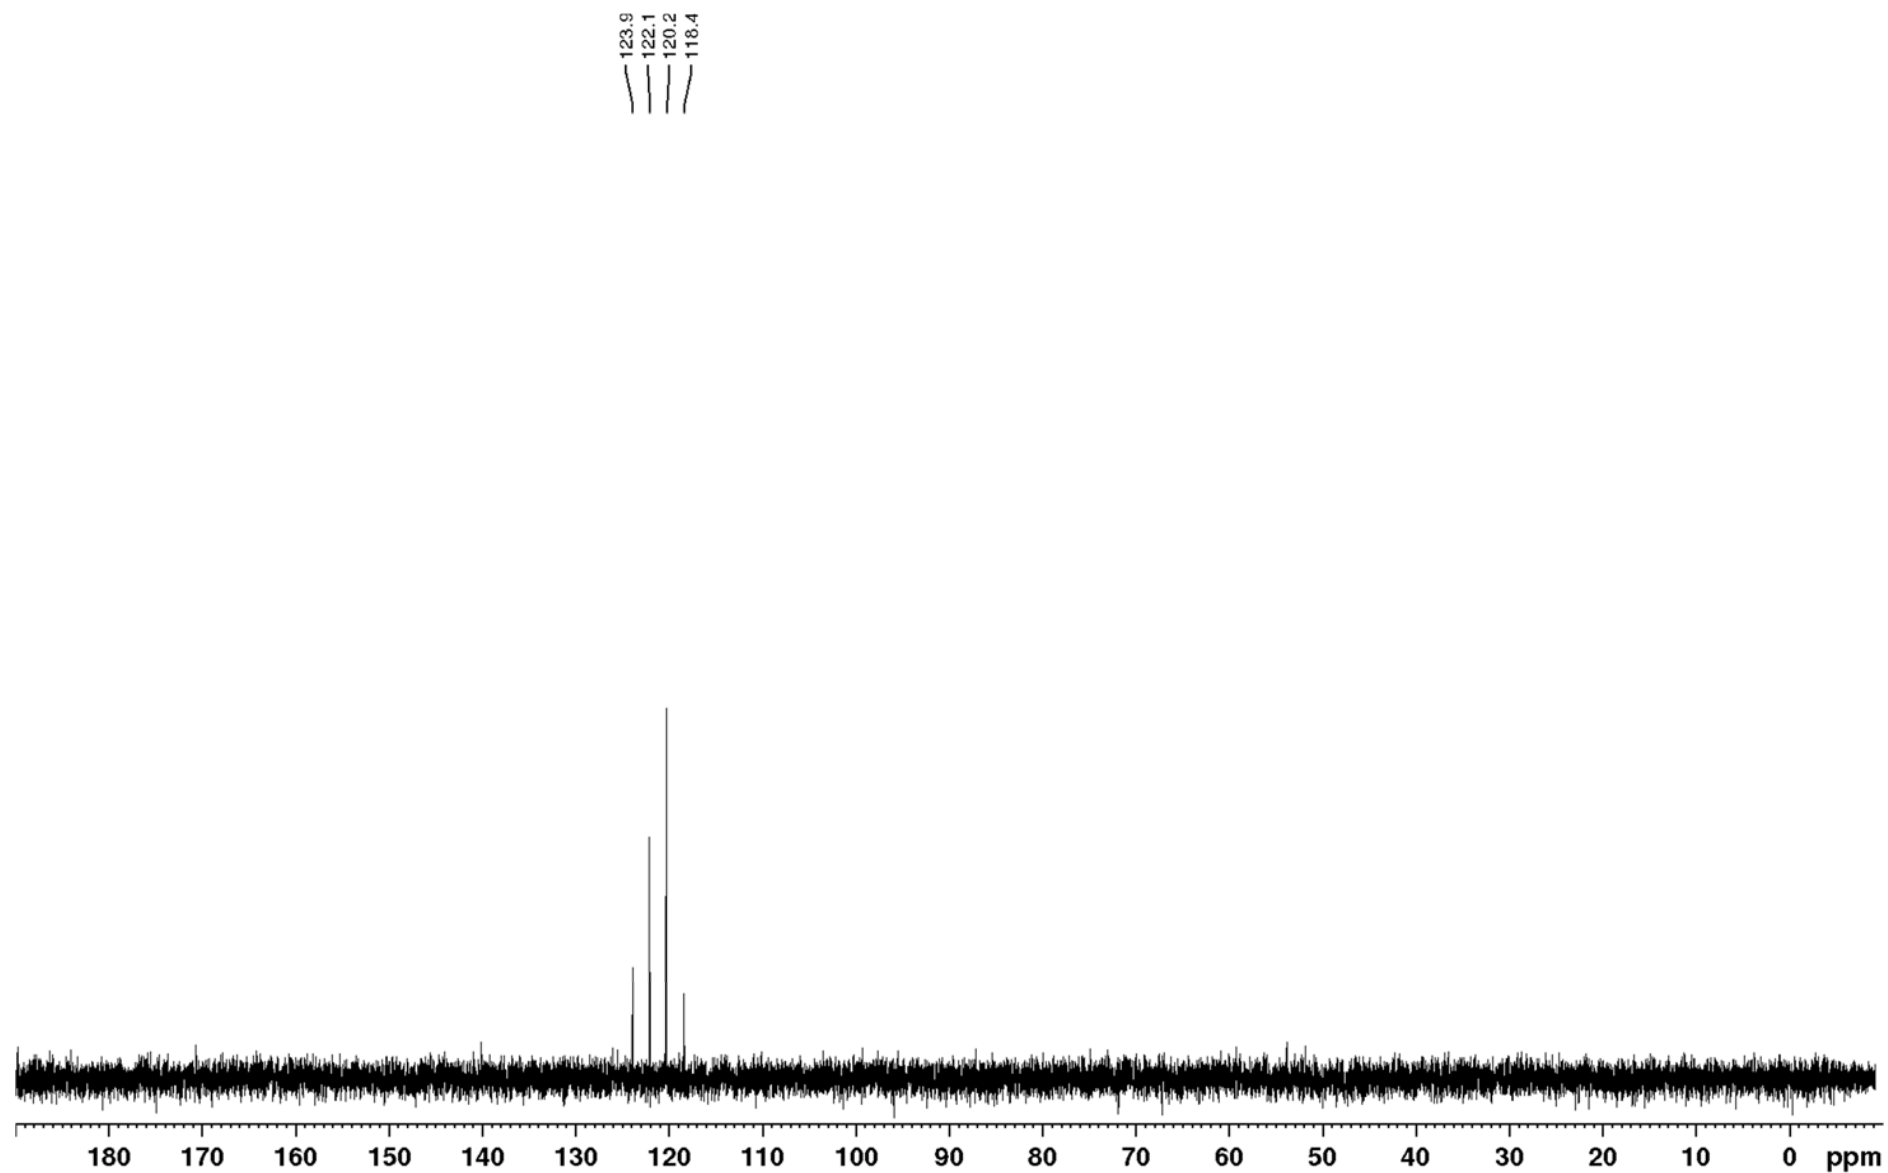

## SUPPORTING INFORMATION

 $^{19}\text{F}\{^1\text{H}\}$  NMR (659 MHz,  $\text{DMSO-}d_6$ ):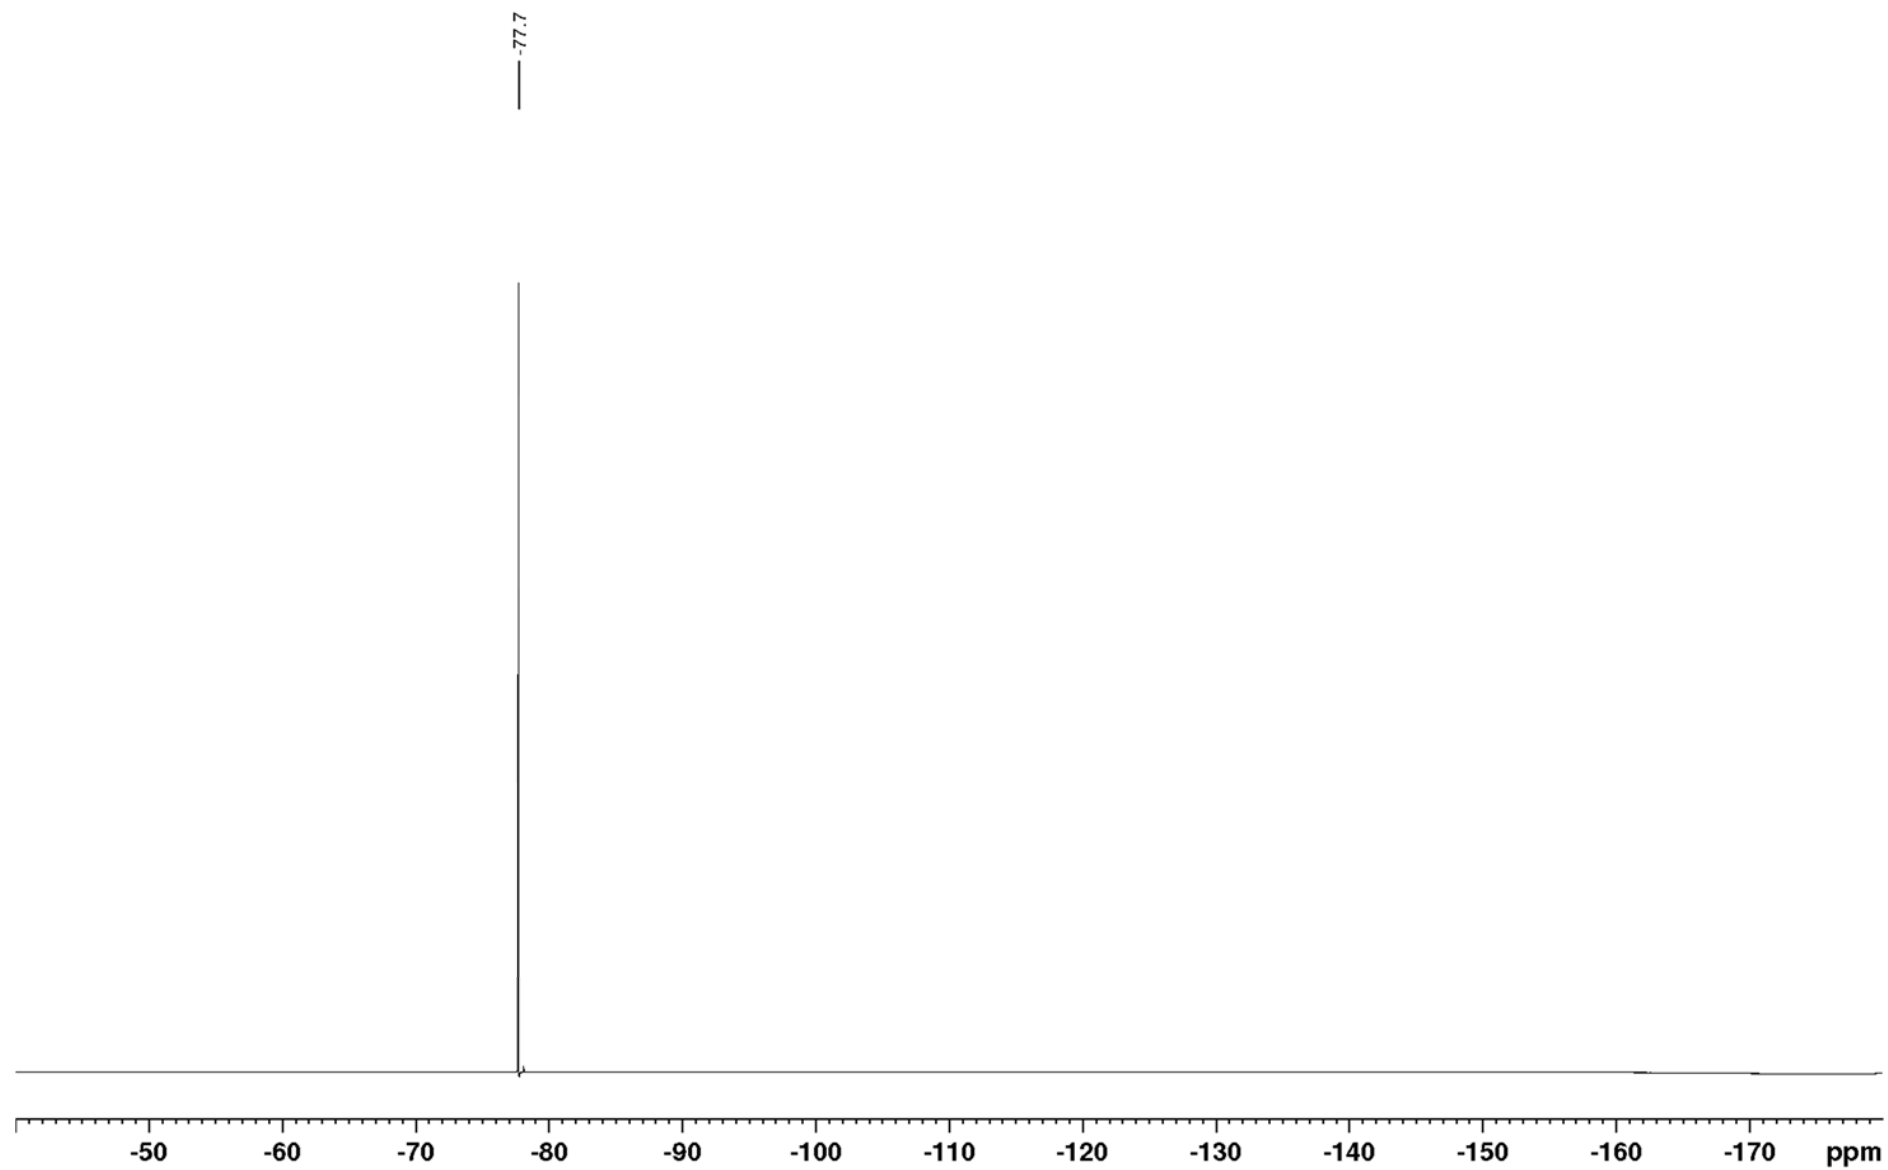

SUPPORTING INFORMATION

---

***N,N,N*-Trimethyl-4-phenylbutan-2-aminium trifluoromethanesulfonate (1x).**

<sup>1</sup>H NMR (400 MHz, DMSO-*d*<sub>6</sub>):



## SUPPORTING INFORMATION

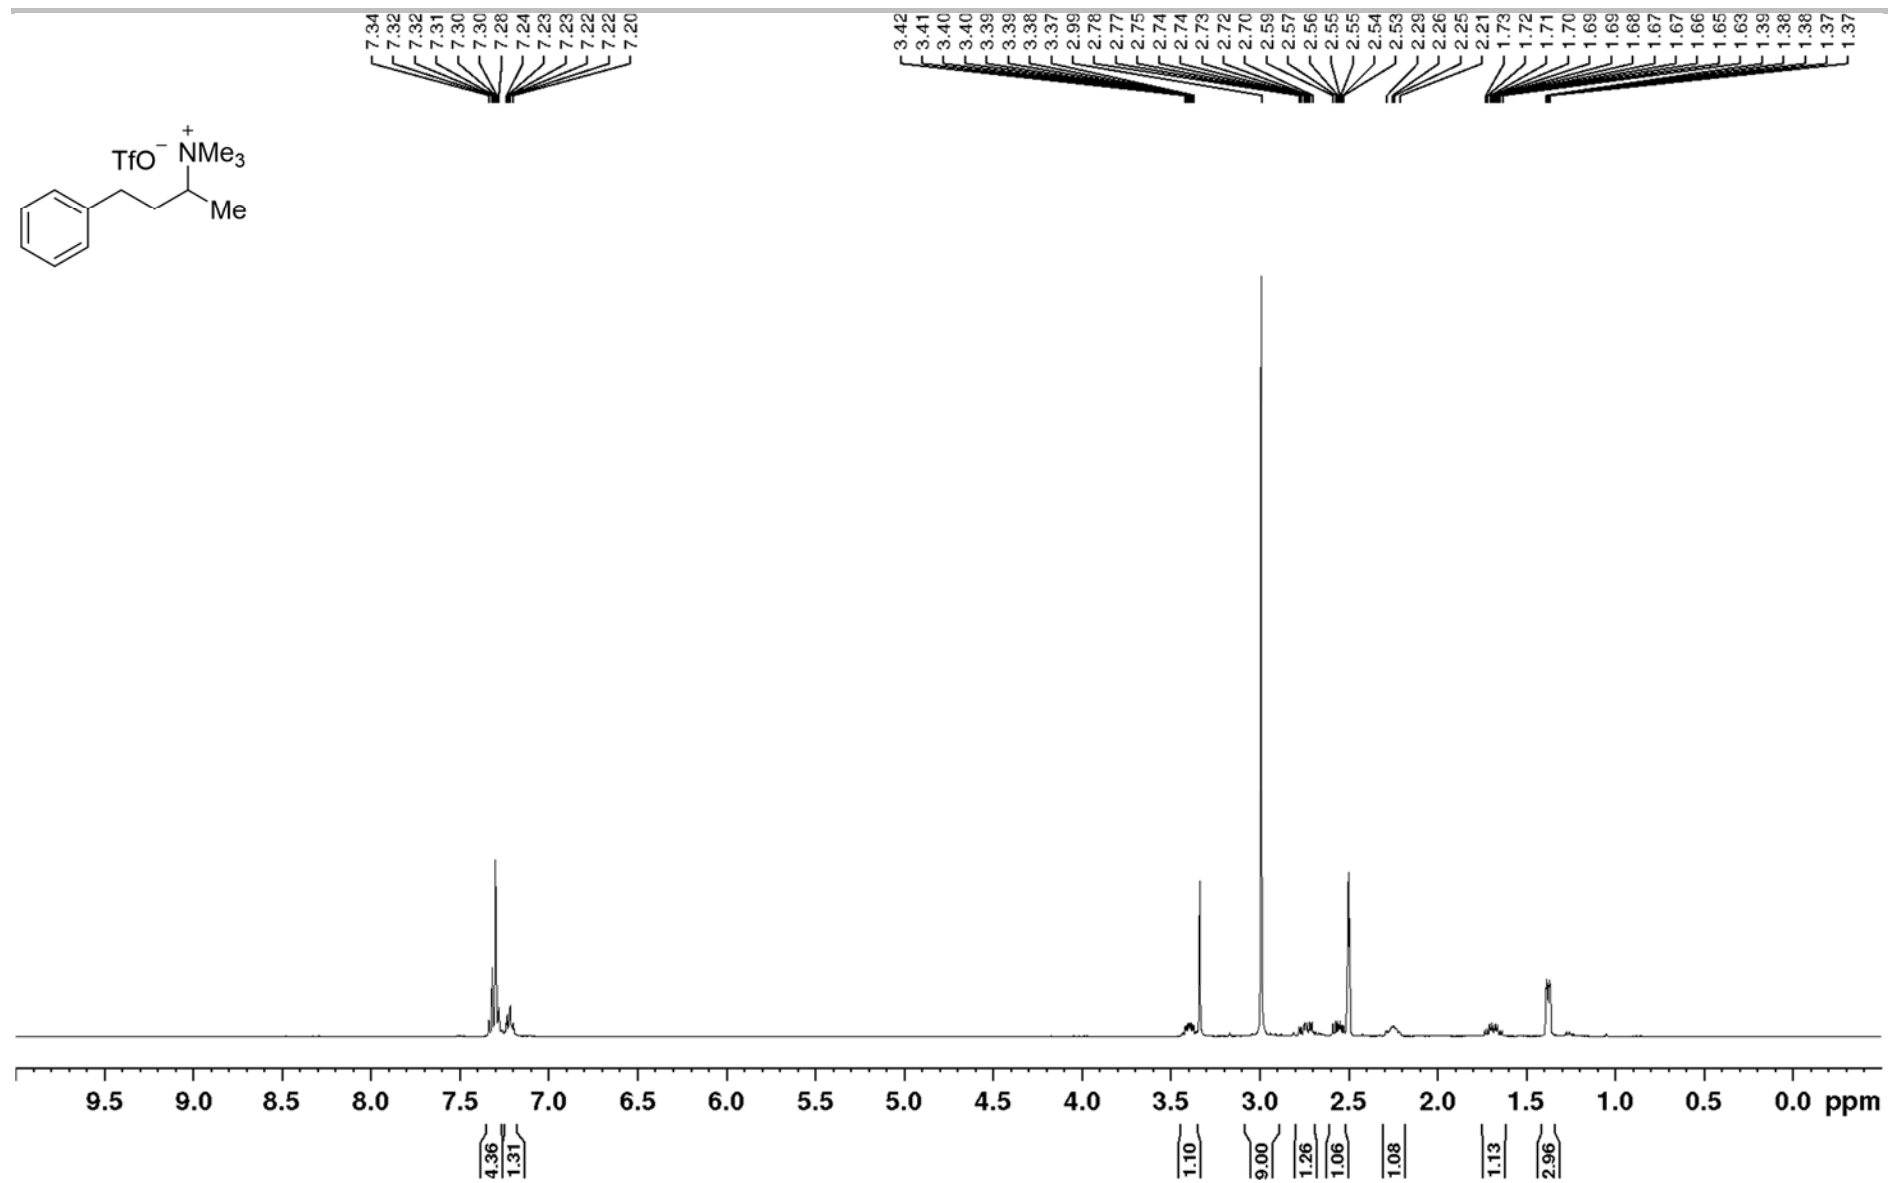

## SUPPORTING INFORMATION

 $^{13}\text{C}\{^1\text{H}\}$  NMR (101 MHz,  $\text{DMSO-}d_6$ ):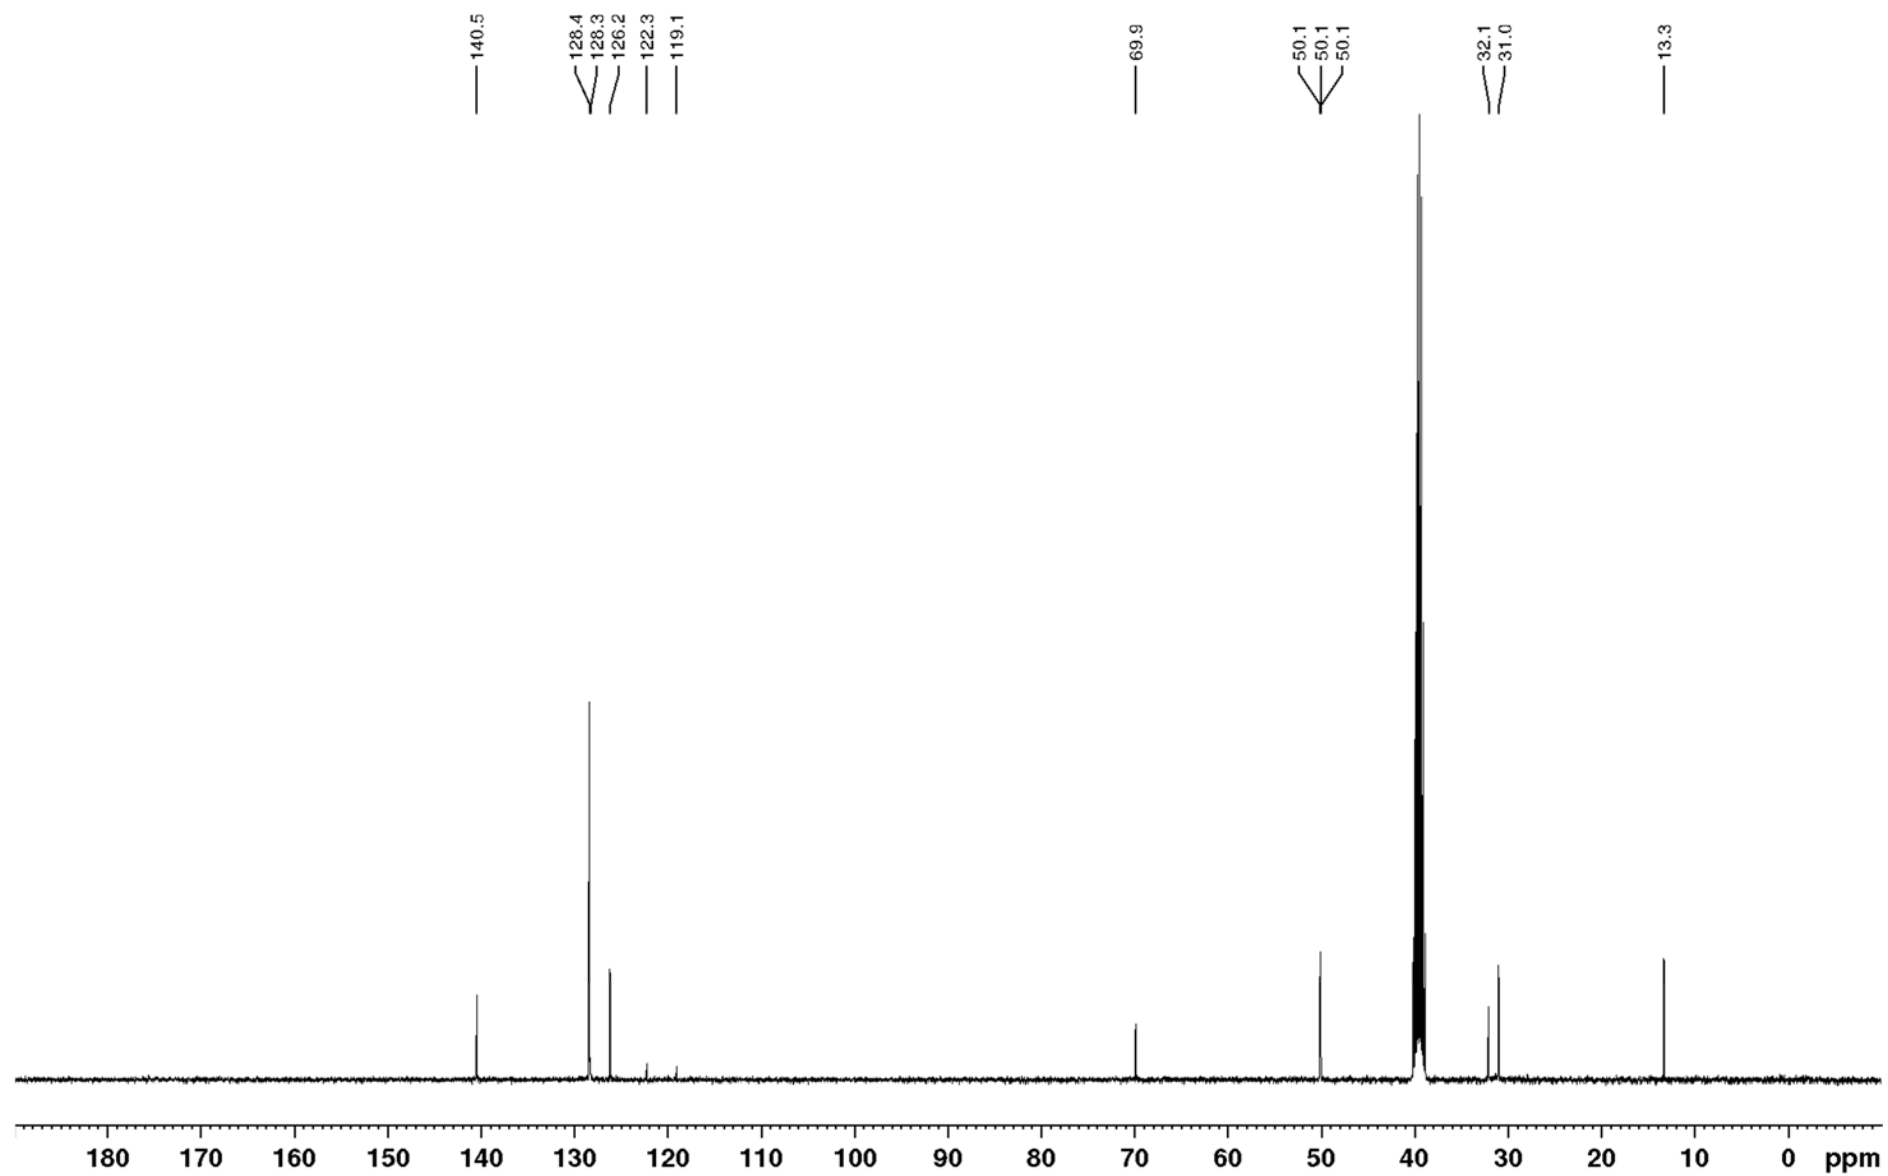

## SUPPORTING INFORMATION

 $^{13}\text{C}\{^{19}\text{F}\}$  DEPT NMR (126 MHz,  $\text{DMSO-}d_6$ ):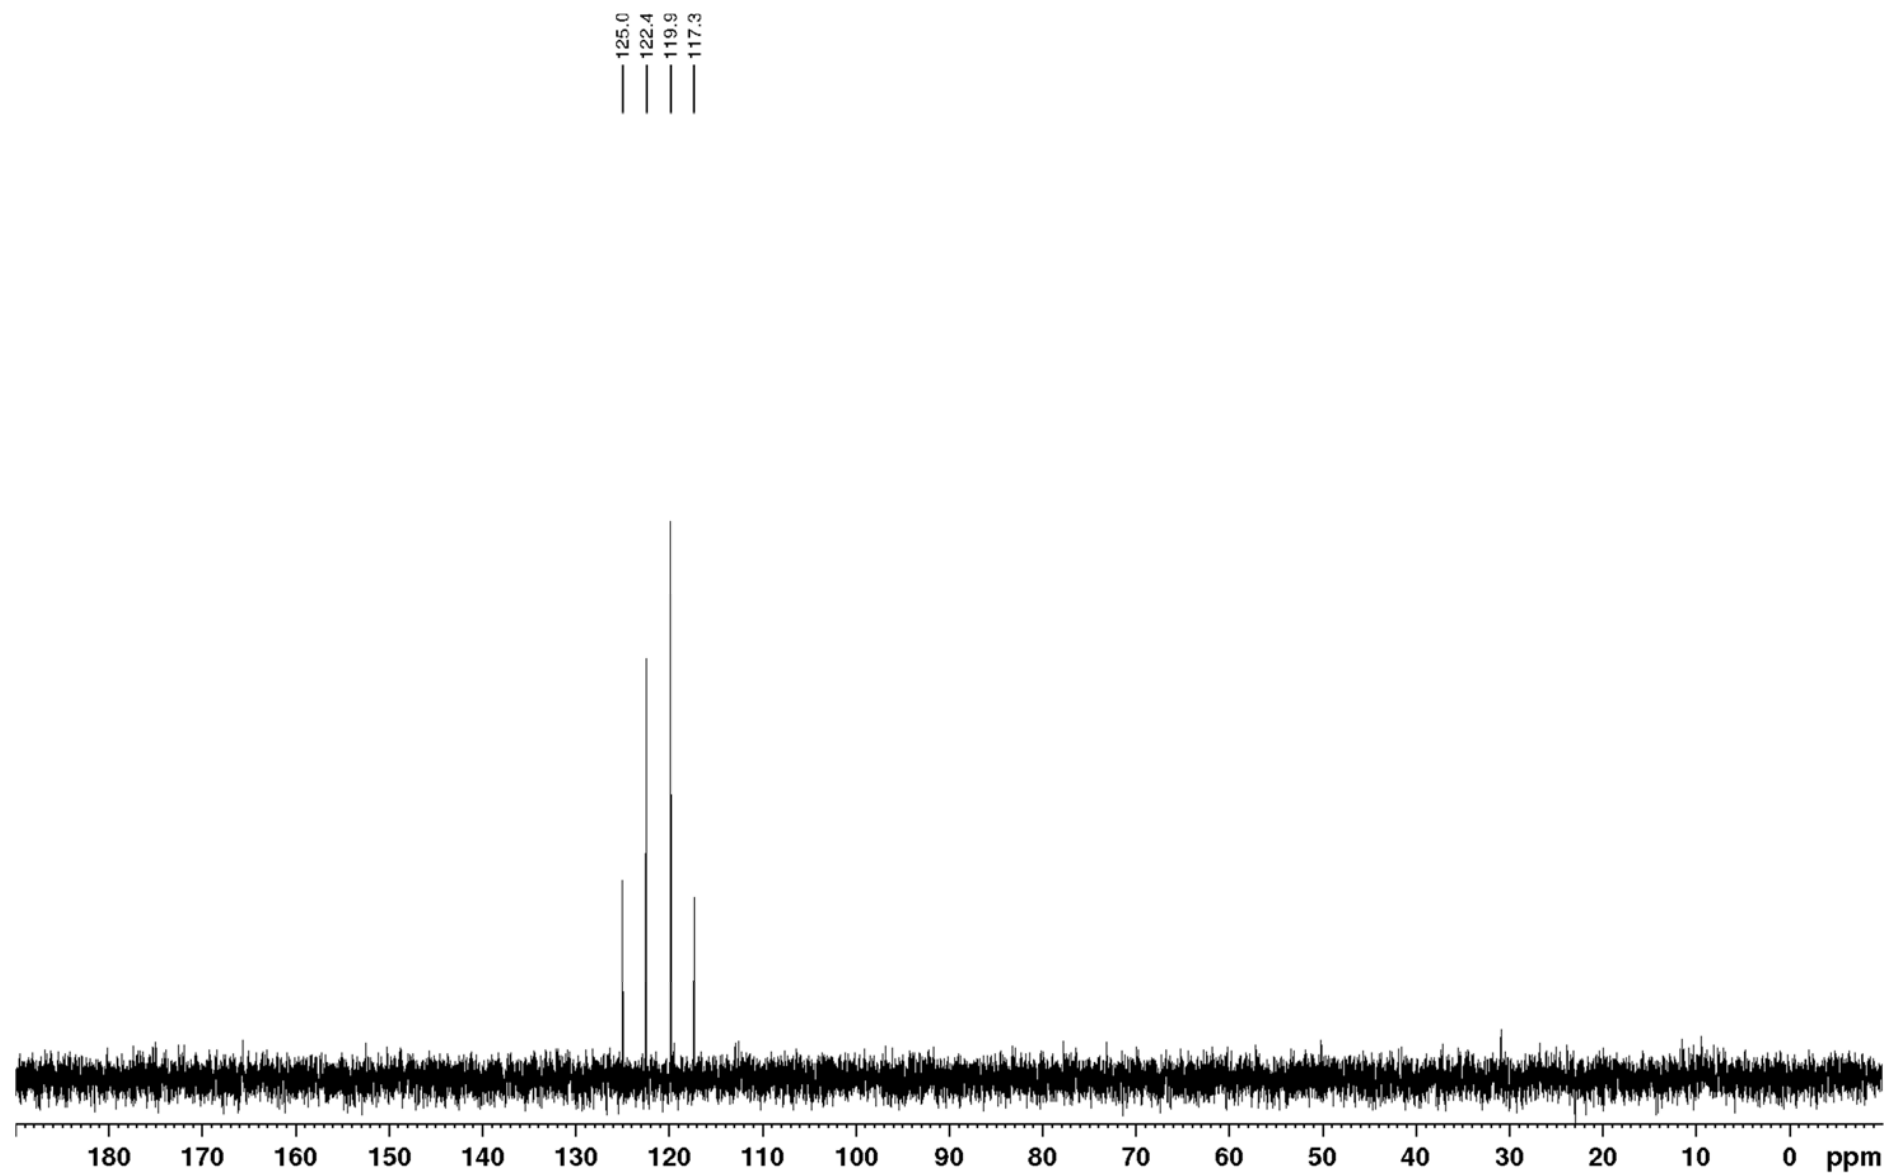

## SUPPORTING INFORMATION

 $^{19}\text{F}\{^1\text{H}\}$  NMR (471 MHz,  $\text{DMSO-}d_6$ ):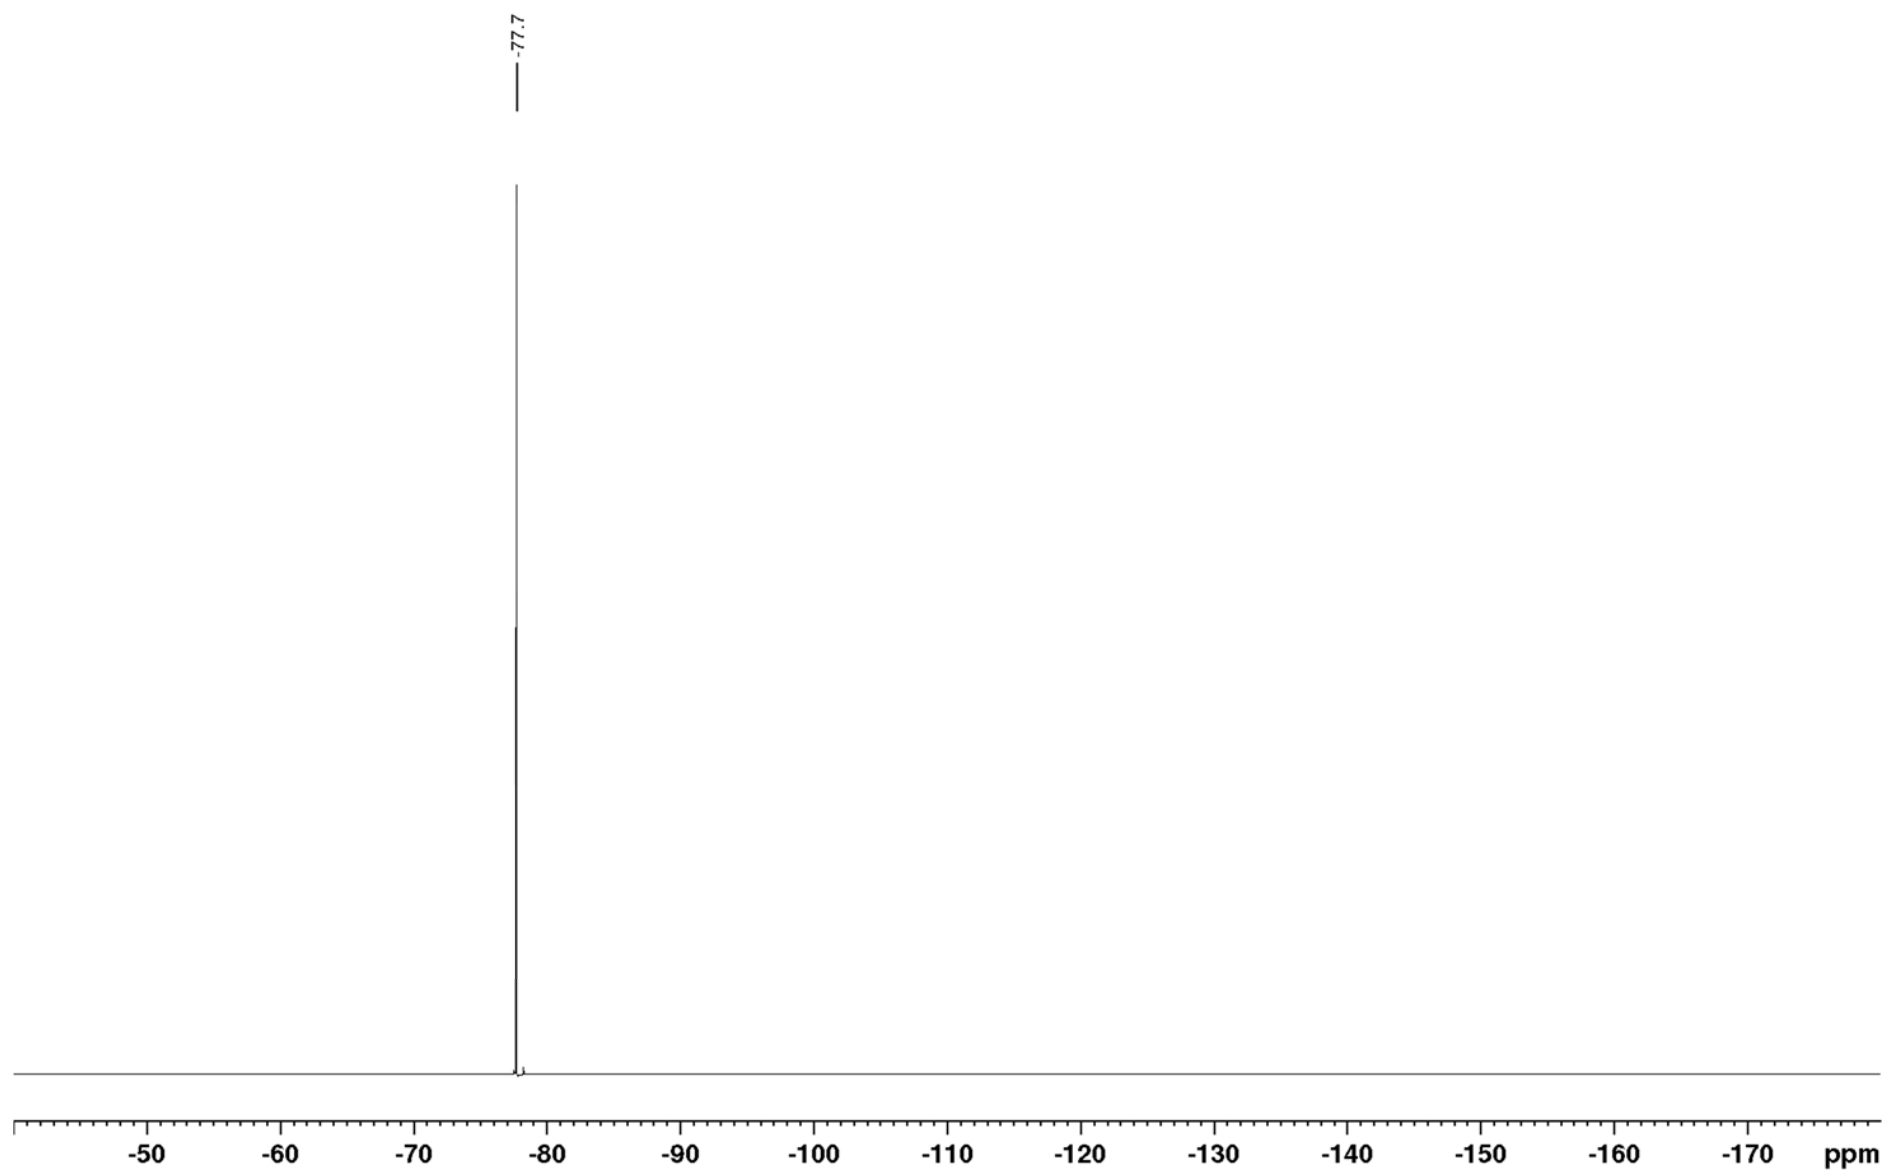

## SUPPORTING INFORMATION

(*E*)-*N,N,N*-Trimethyl-3-phenylprop-2-en-1-aminium trifluoromethanesulfonate (5).

<sup>1</sup>H NMR (700 MHz,

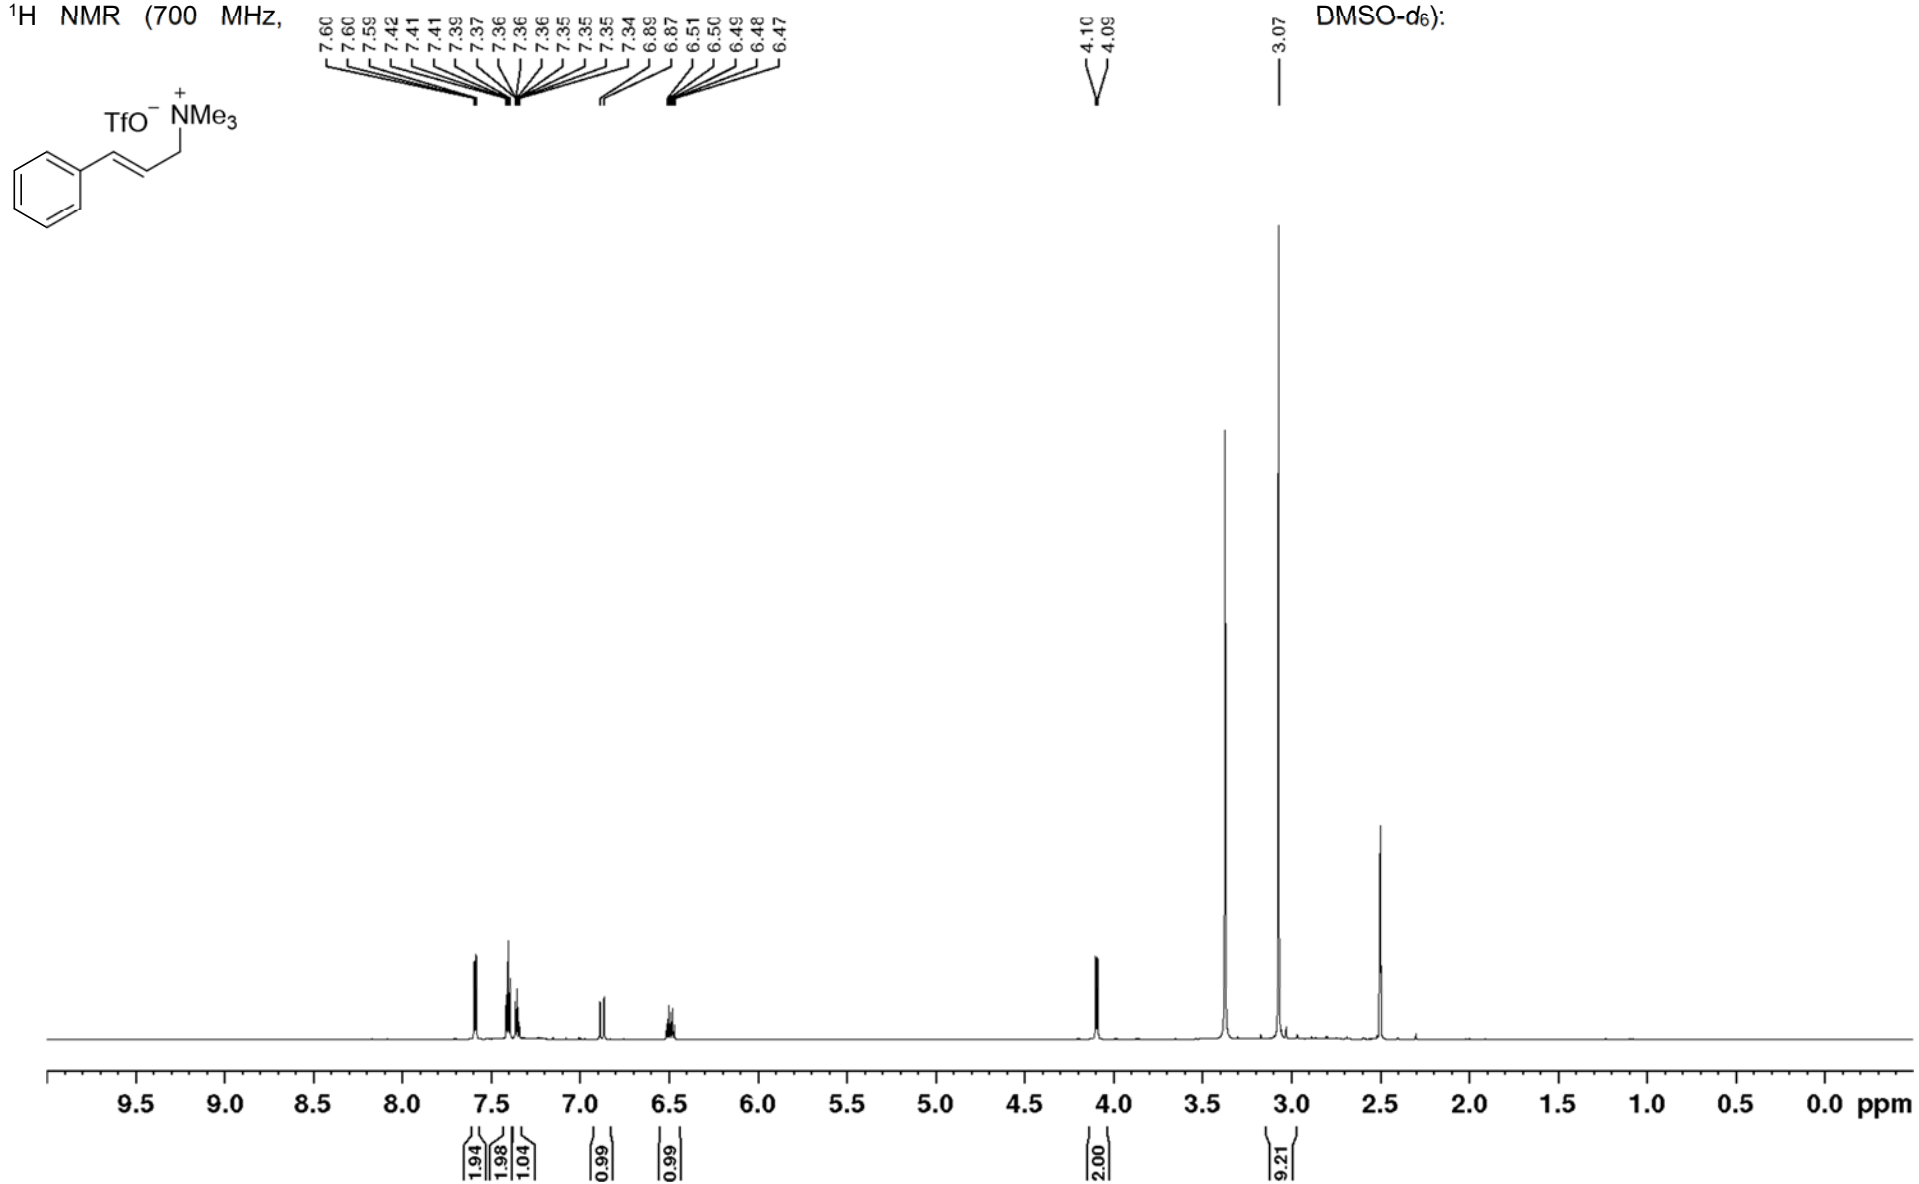

## SUPPORTING INFORMATION

 $^{13}\text{C}\{^1\text{H}\}$  NMR (126 MHz,  $\text{DMSO-}d_6$ ):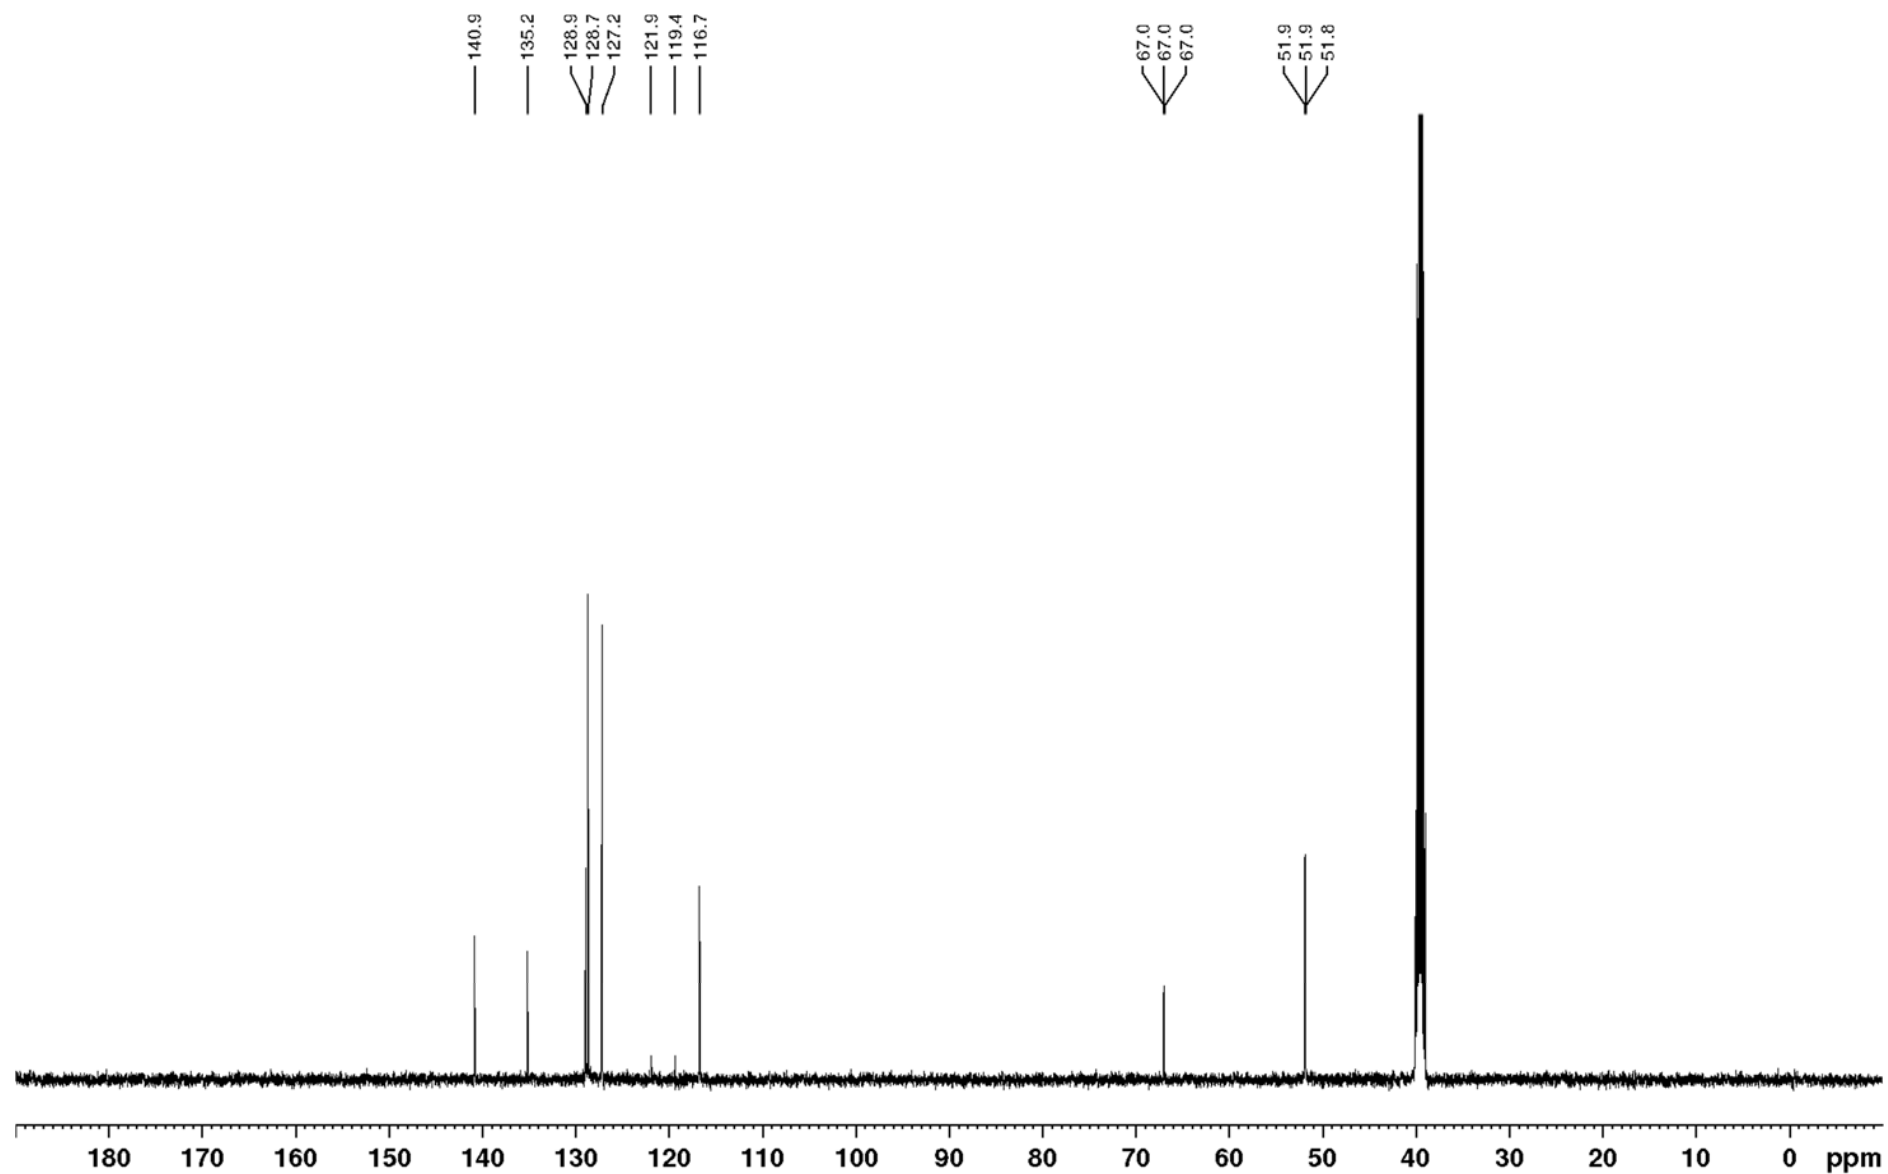

## SUPPORTING INFORMATION

 $^{13}\text{C}\{^{19}\text{F}\}$  DEPT NMR (176 MHz,  $\text{DMSO-}d_6$ ):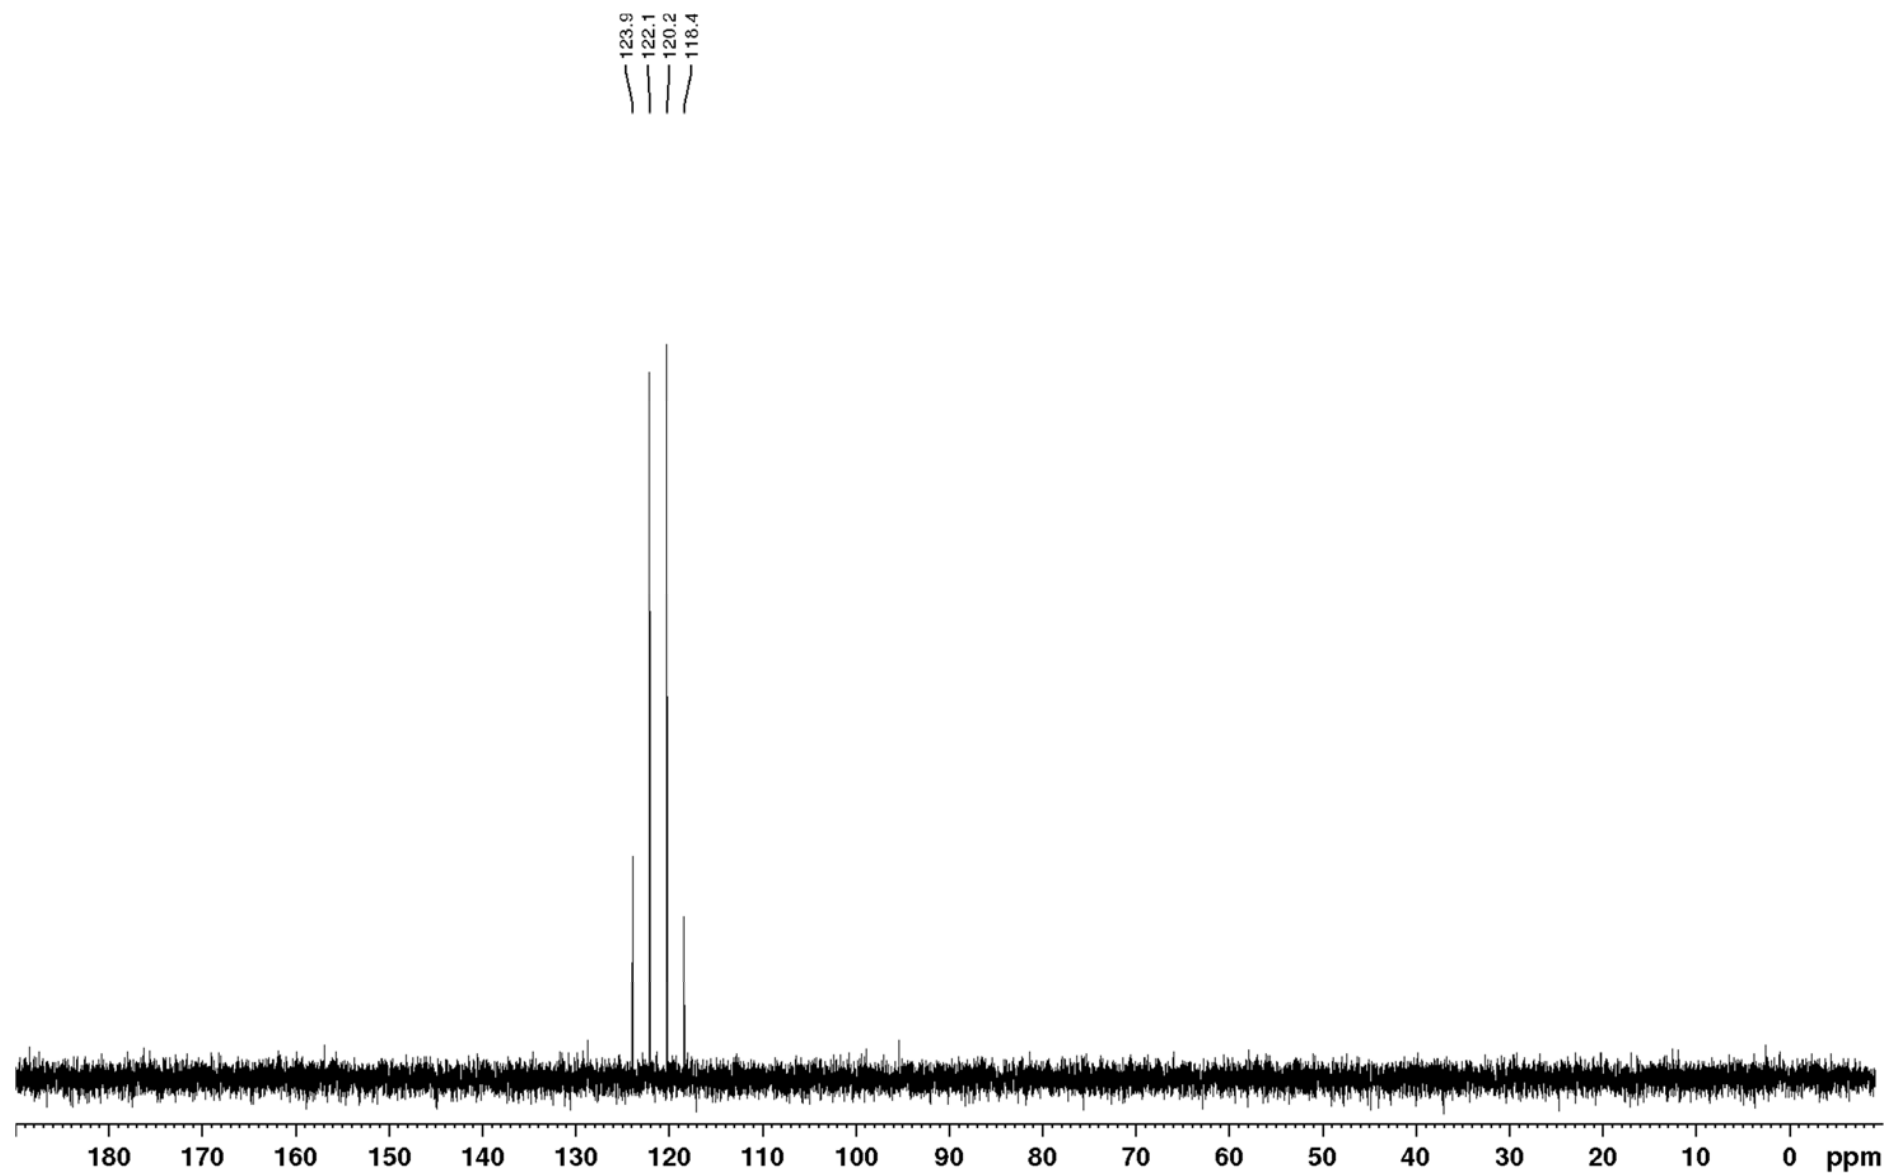

## SUPPORTING INFORMATION

 $^{19}\text{F}\{^1\text{H}\}$  NMR (659 MHz,  $\text{DMSO-}d_6$ ):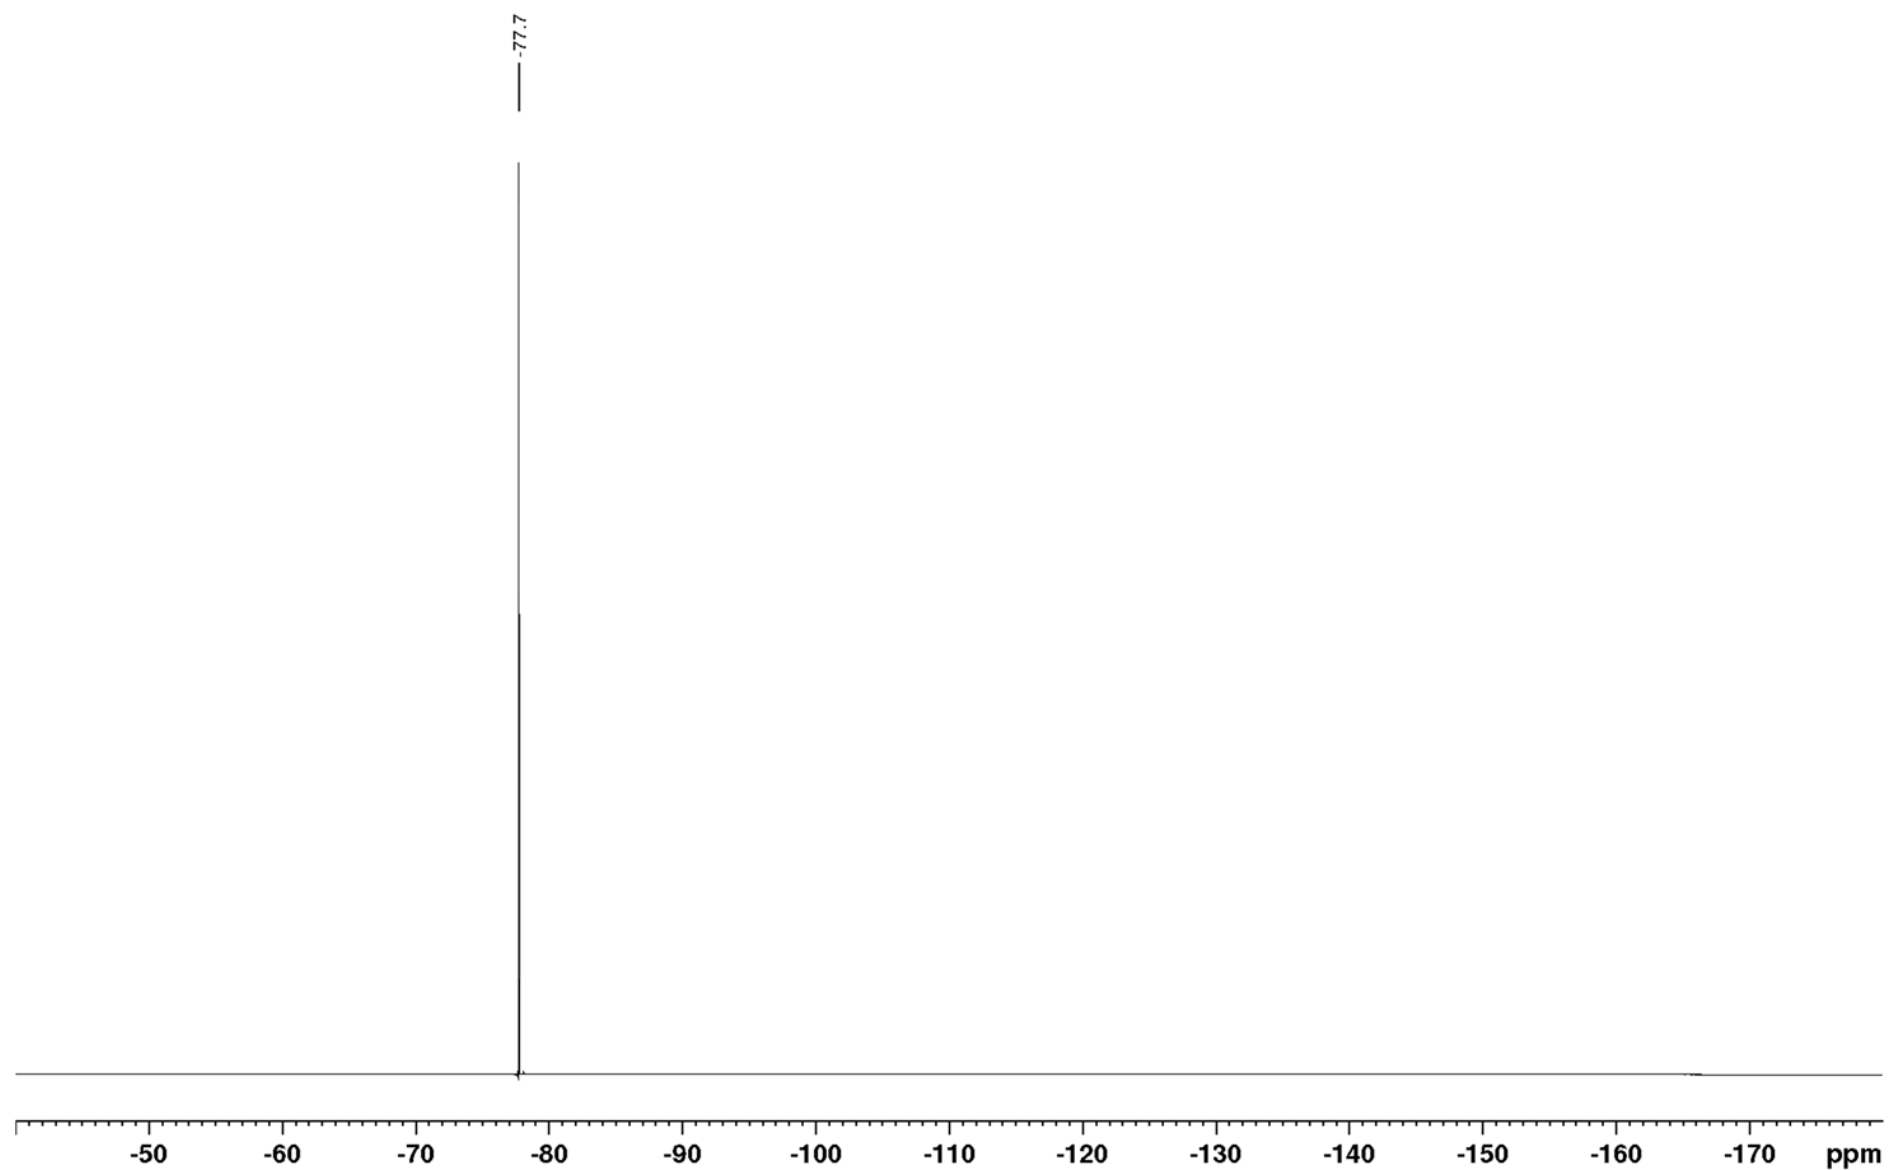



## SUPPORTING INFORMATION

***N,N,N*-Trimethyl-4-phenylbut-3-yn-2-aminium (7)**<sup>1</sup>H NMR (500 MHz,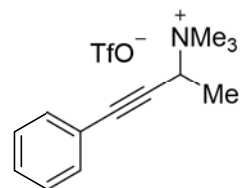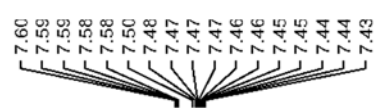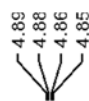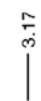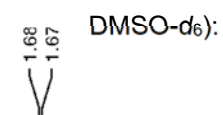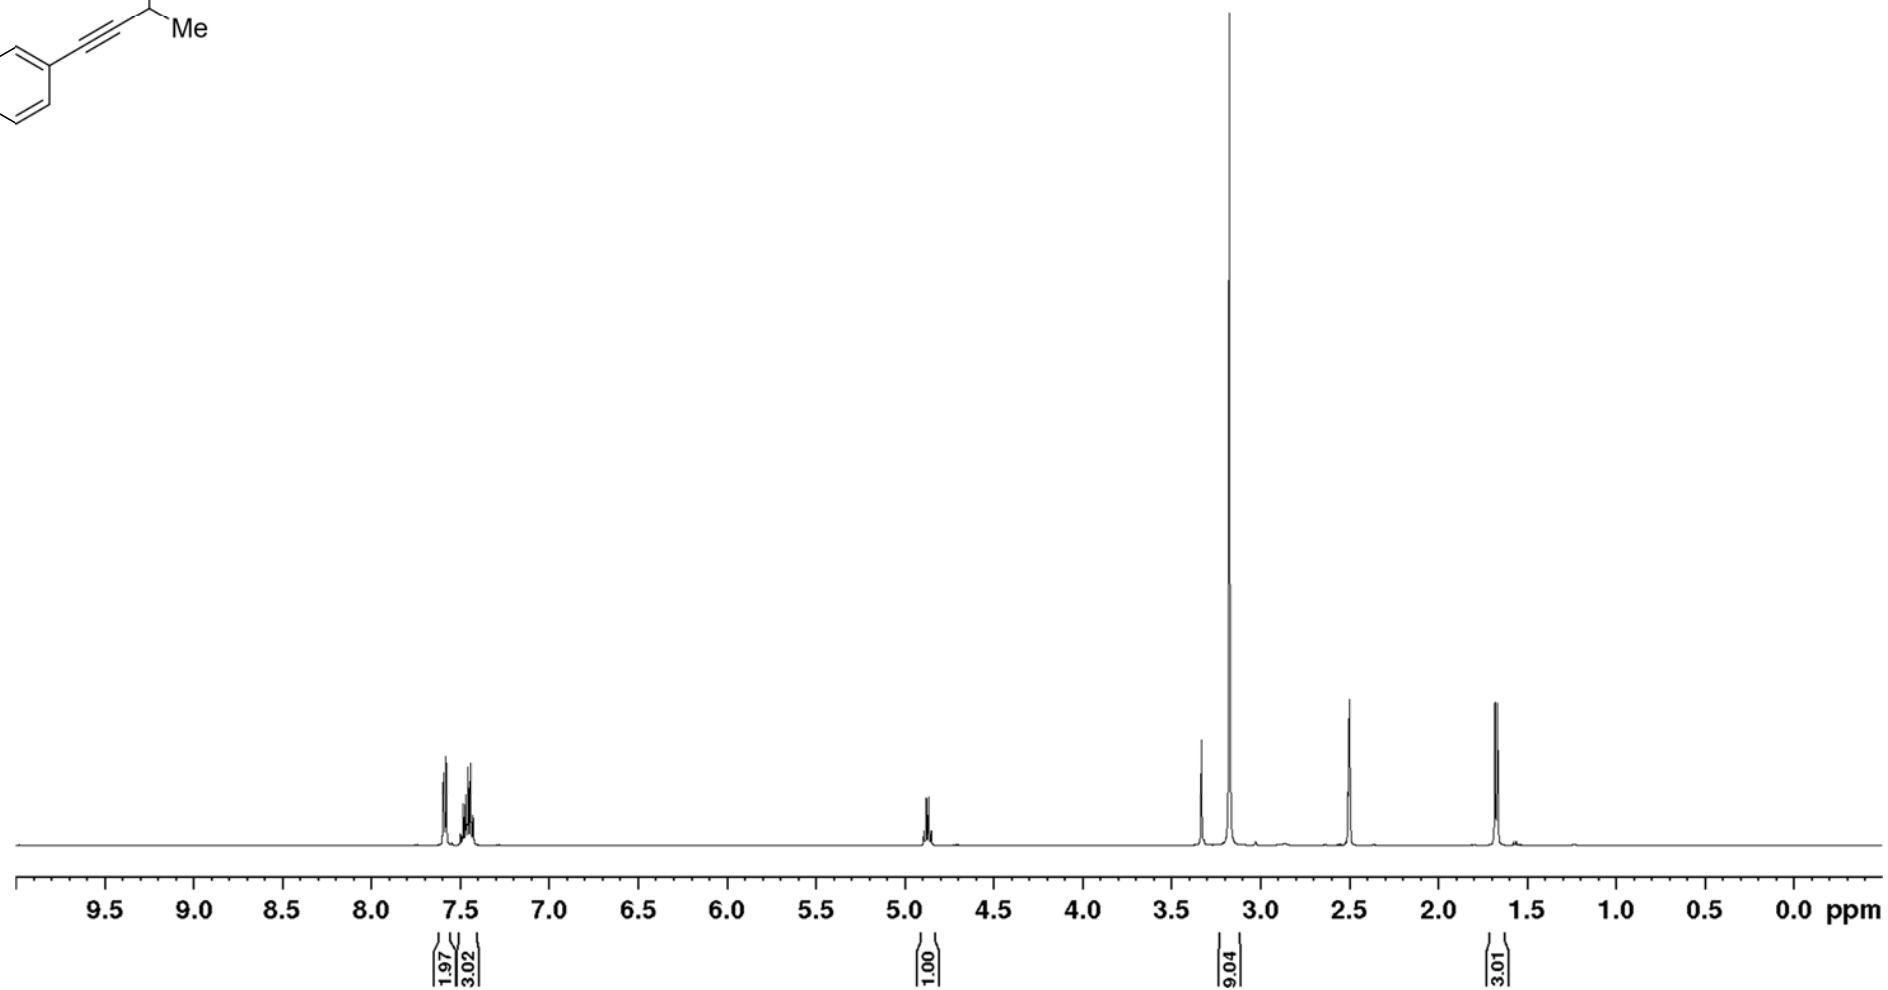

## SUPPORTING INFORMATION

 $^{13}\text{C}\{^1\text{H}\}$  NMR (101 MHz,  $\text{DMSO-}d_6$ ):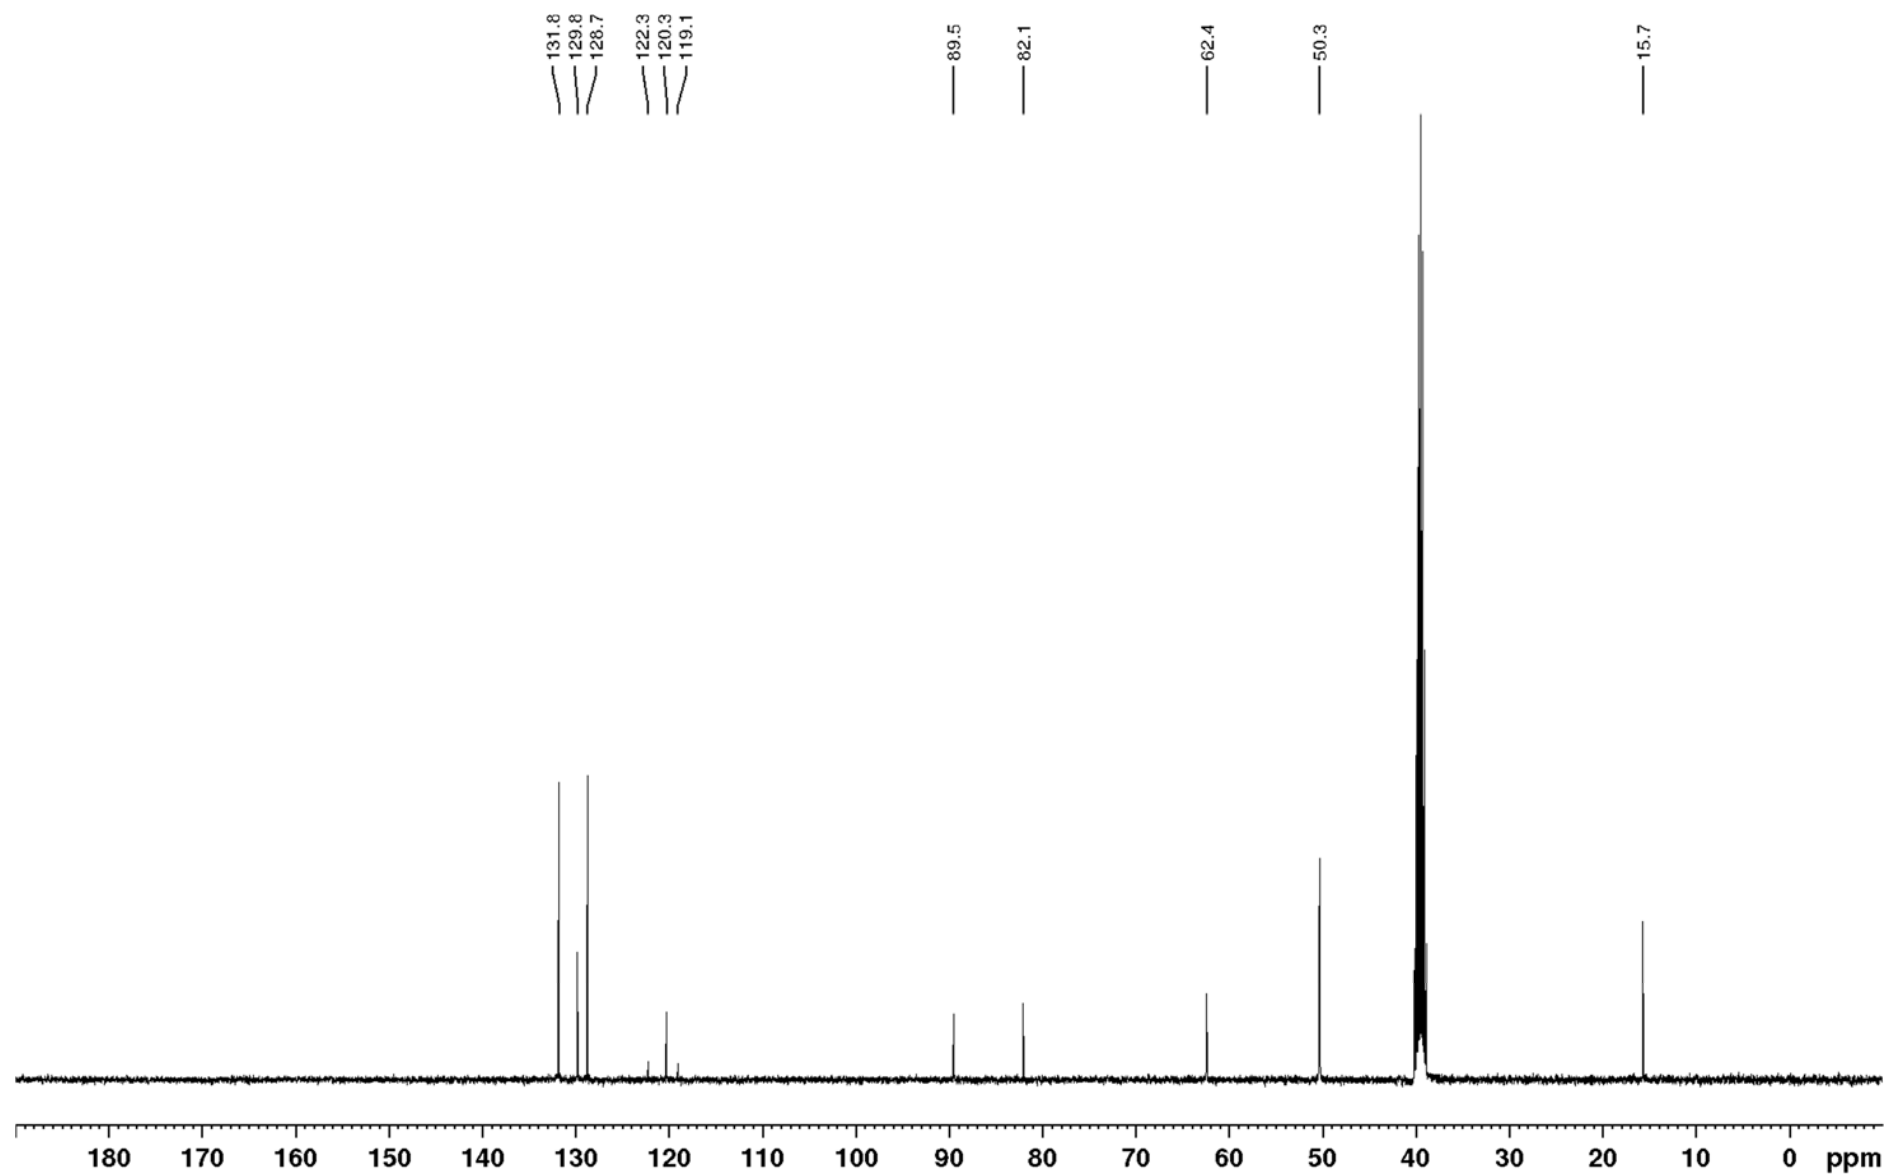

## SUPPORTING INFORMATION

 $^{13}\text{C}\{^{19}\text{F}\}$  DEPT NMR (126 MHz,  $\text{DMSO-}d_6$ ):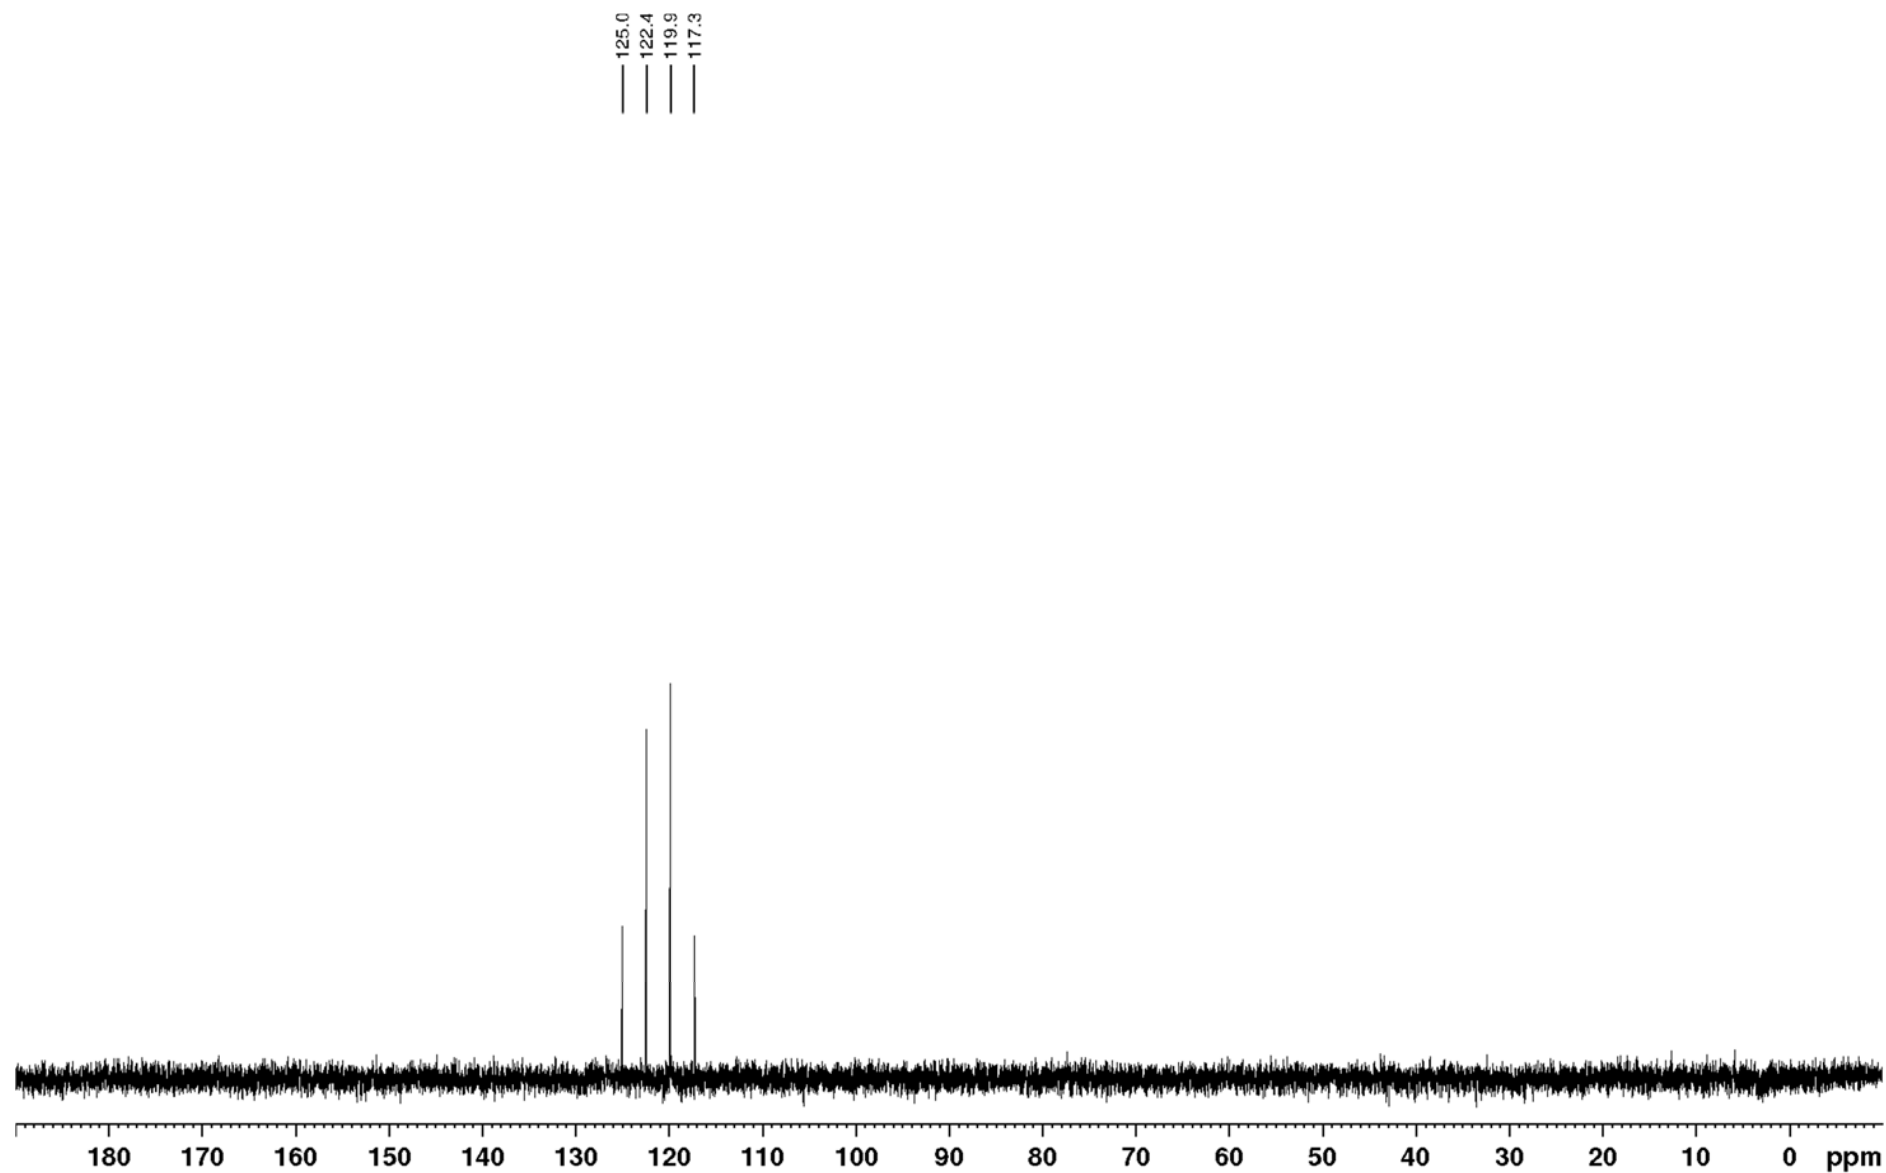

## SUPPORTING INFORMATION

 $^{19}\text{F}\{^1\text{H}\}$  NMR (471 MHz,  $\text{DMSO-}d_6$ ):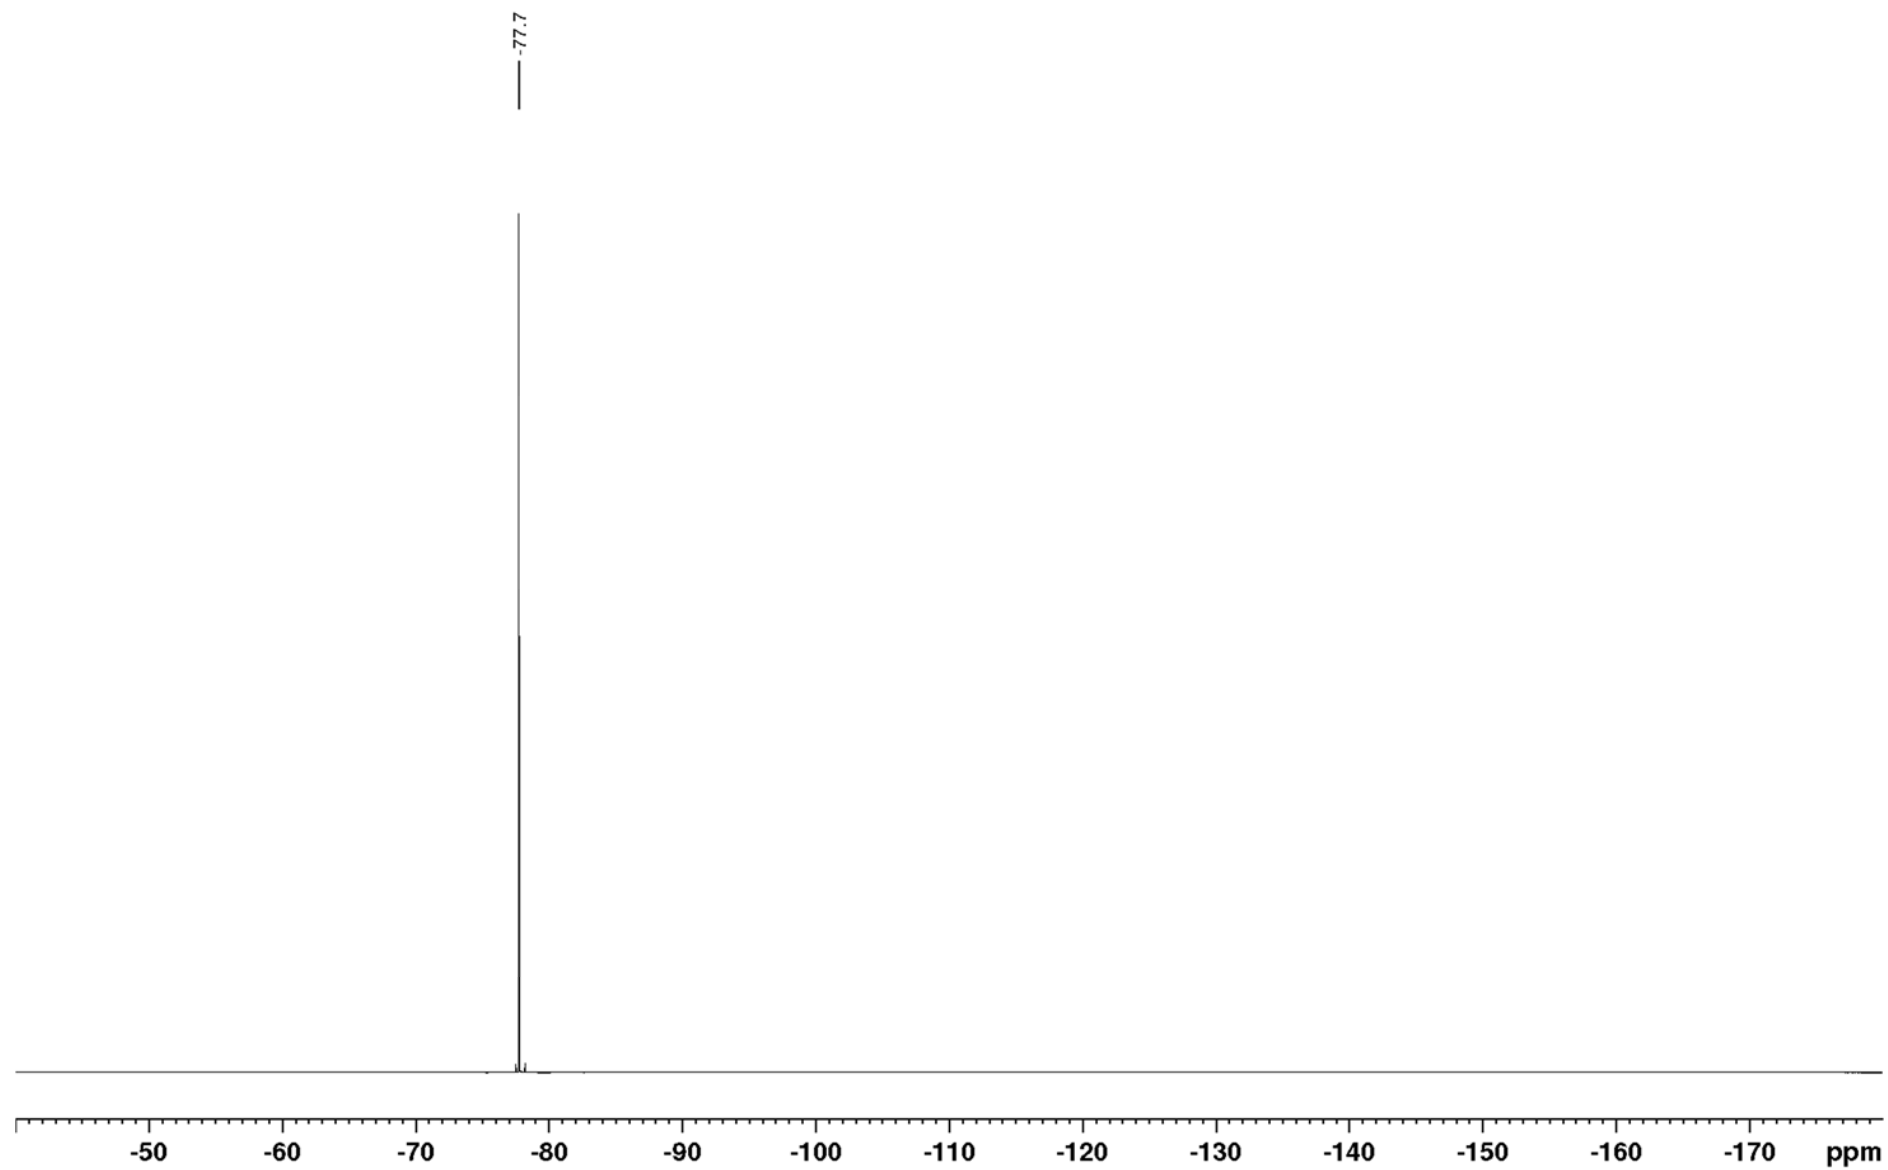

## SUPPORTING INFORMATION

## Dimethyl(phenyl)(1-phenylethyl)silane (4aa)

<sup>1</sup>H NMR (500  
CDCl<sub>3</sub>):

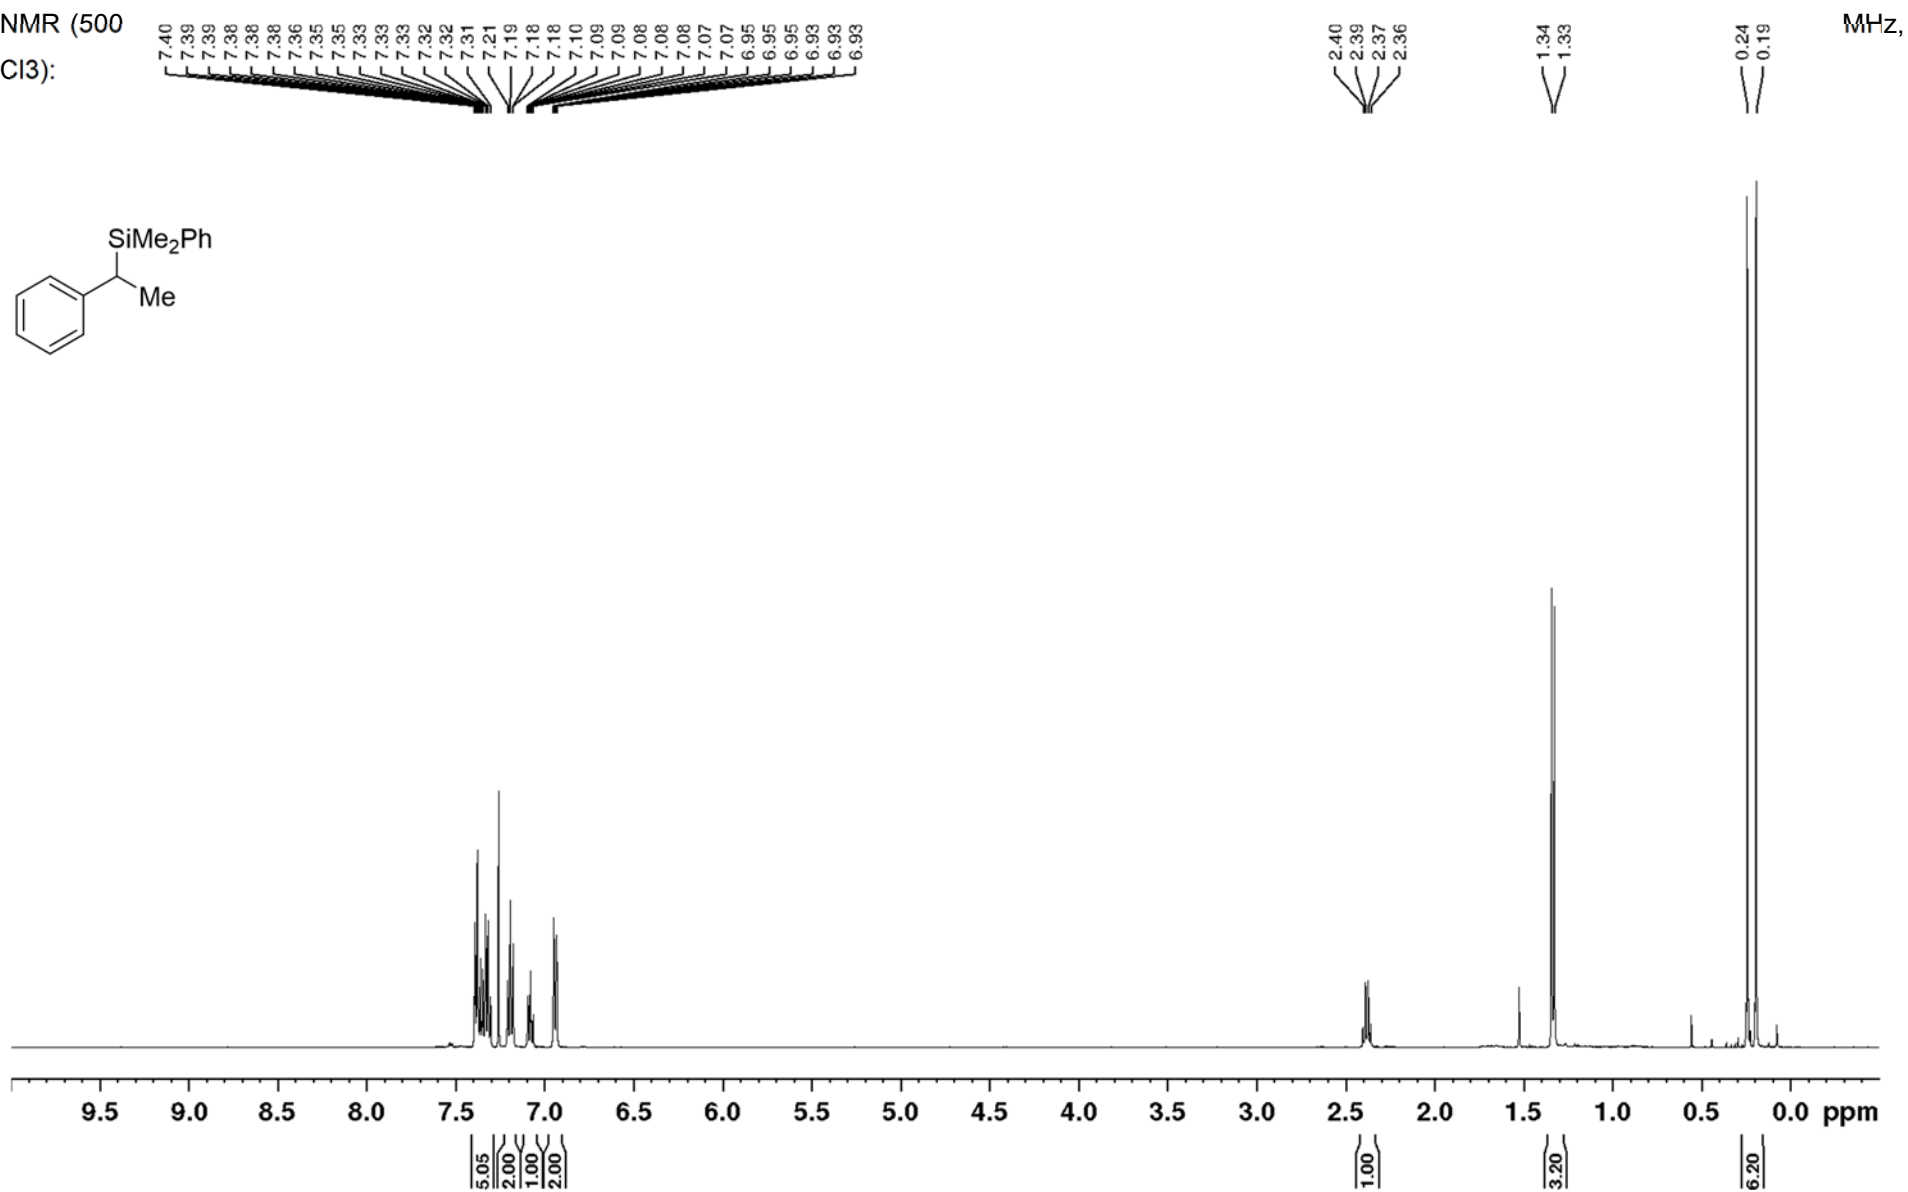

## SUPPORTING INFORMATION

 $^{13}\text{C}\{^1\text{H}\}$  NMR (126 MHz,  $\text{CDCl}_3$ ):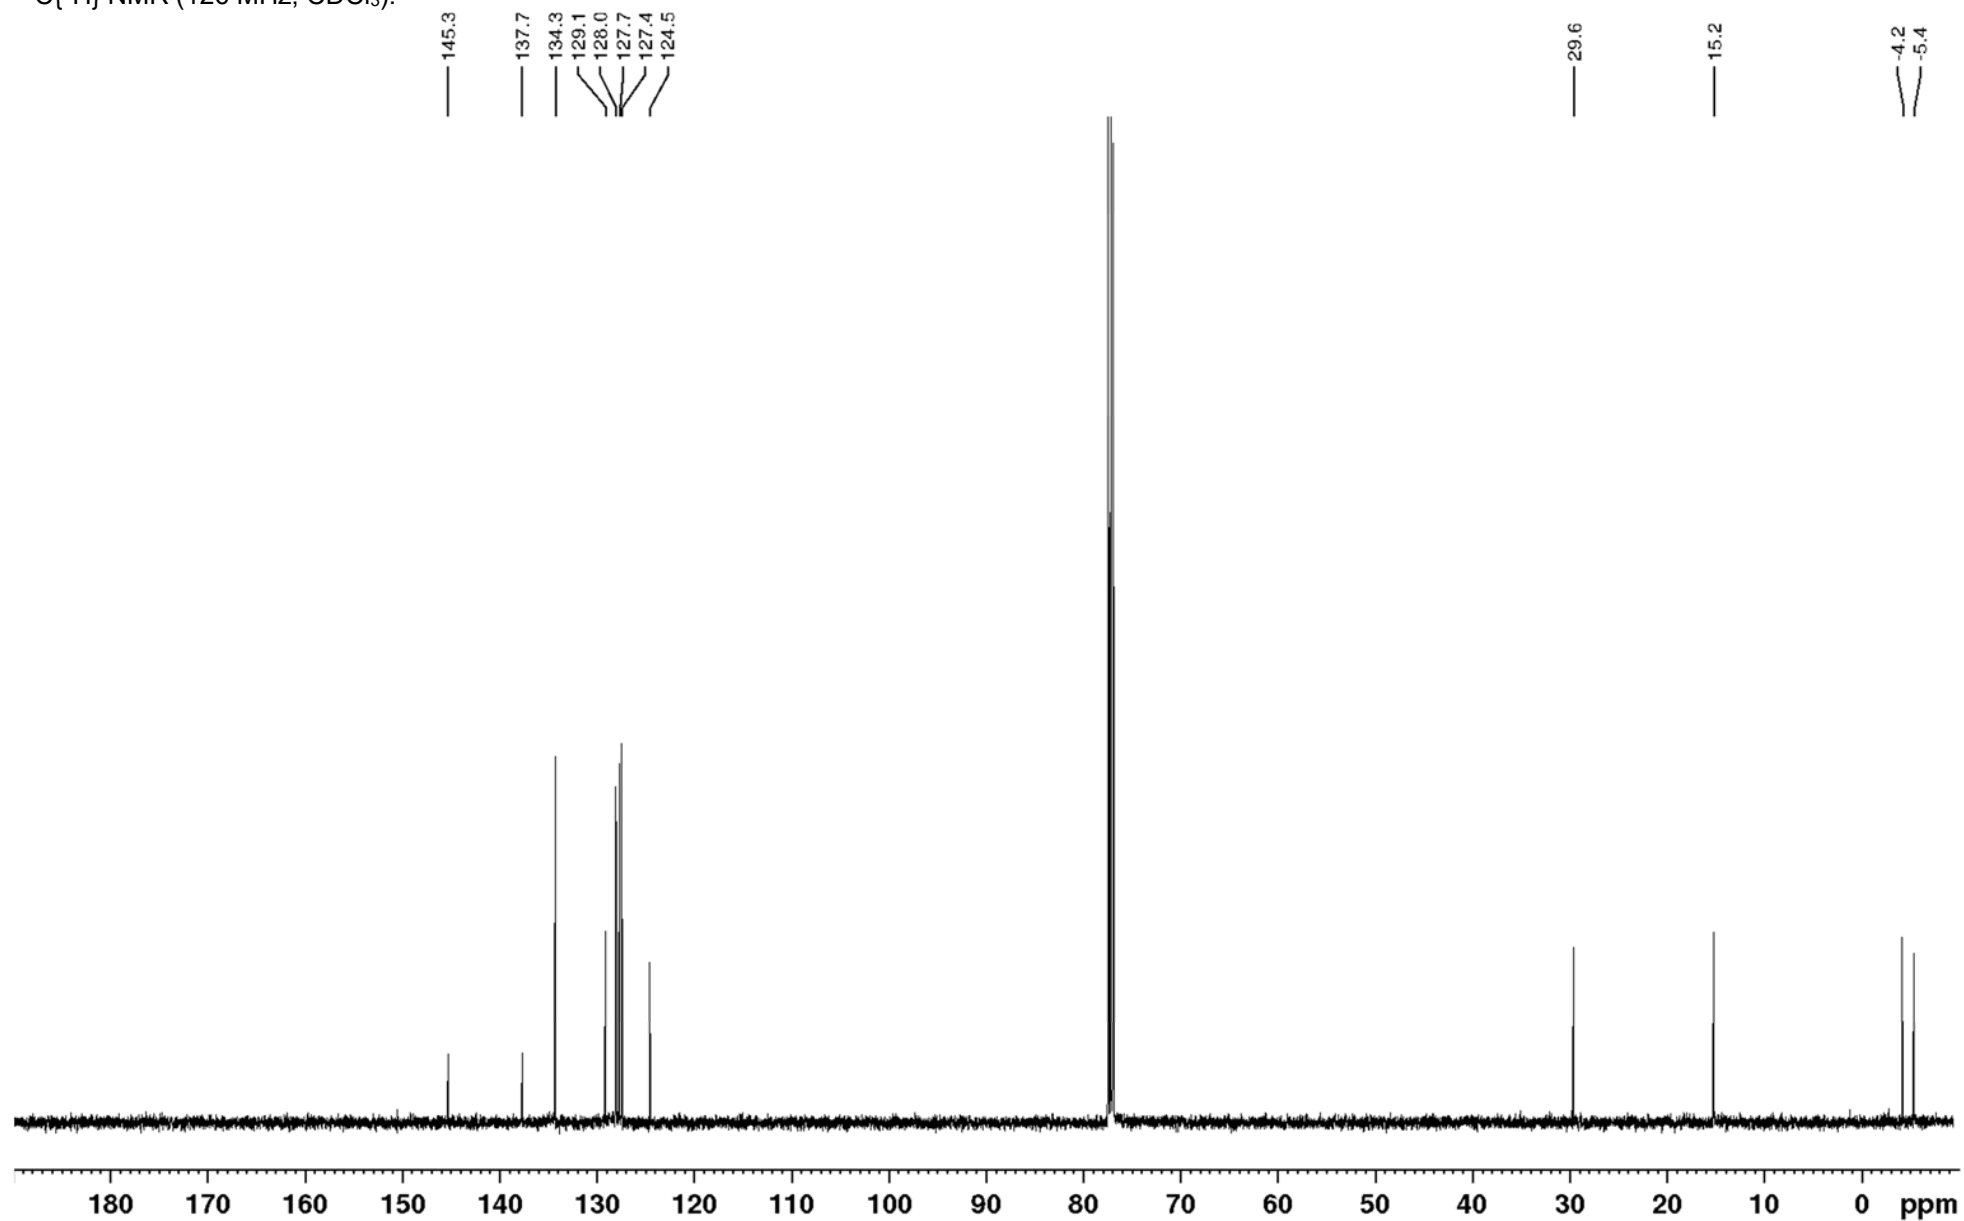

## SUPPORTING INFORMATION

$^{29}\text{Si}\{^1\text{H}\}$  DEPT NMR (99 MHz,  $\text{CDCl}_3$ ):

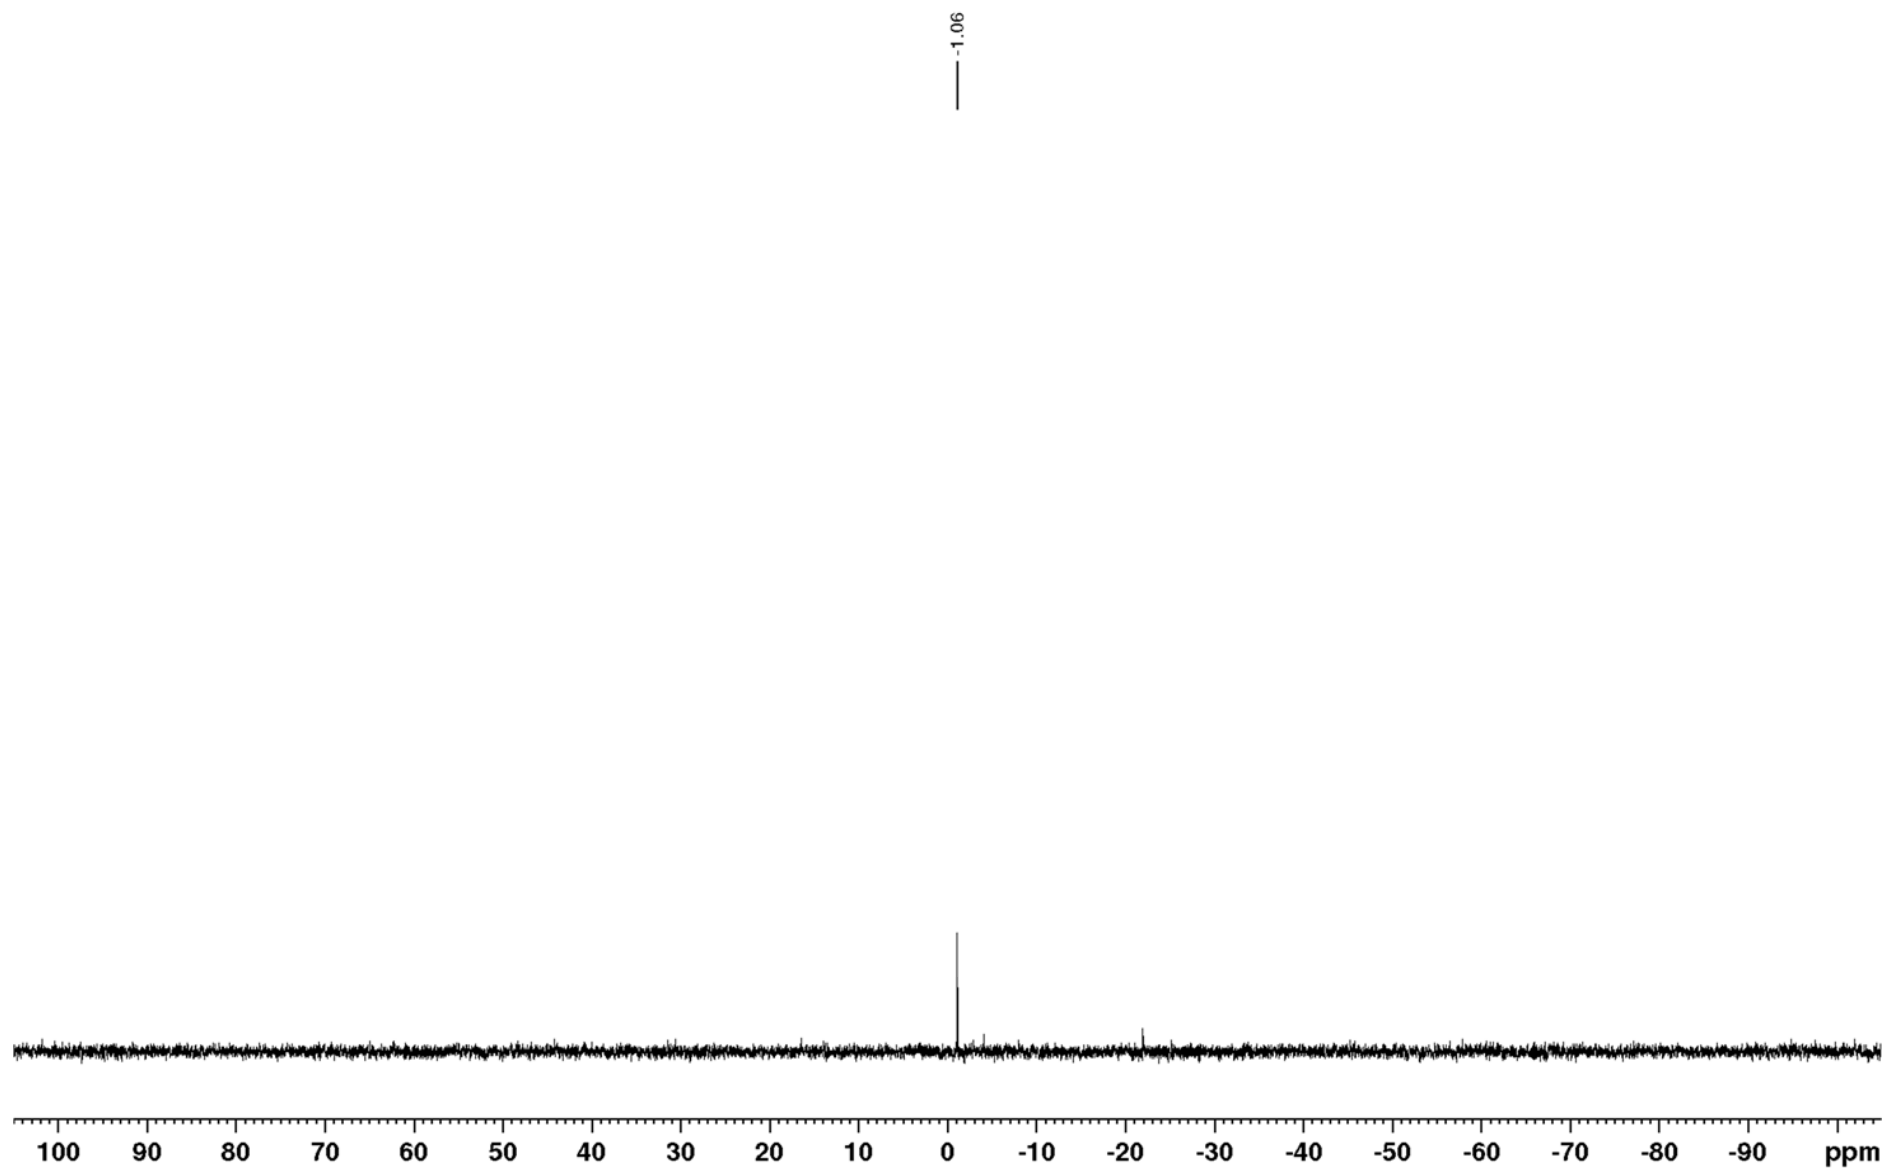

## SUPPORTING INFORMATION

## Methyldiphenyl(1-phenylethyl)silane (4ab)

$^1\text{H}$  NMR  
 $\text{CDCl}_3$ : (500 MHz,

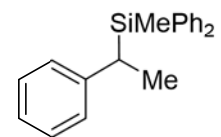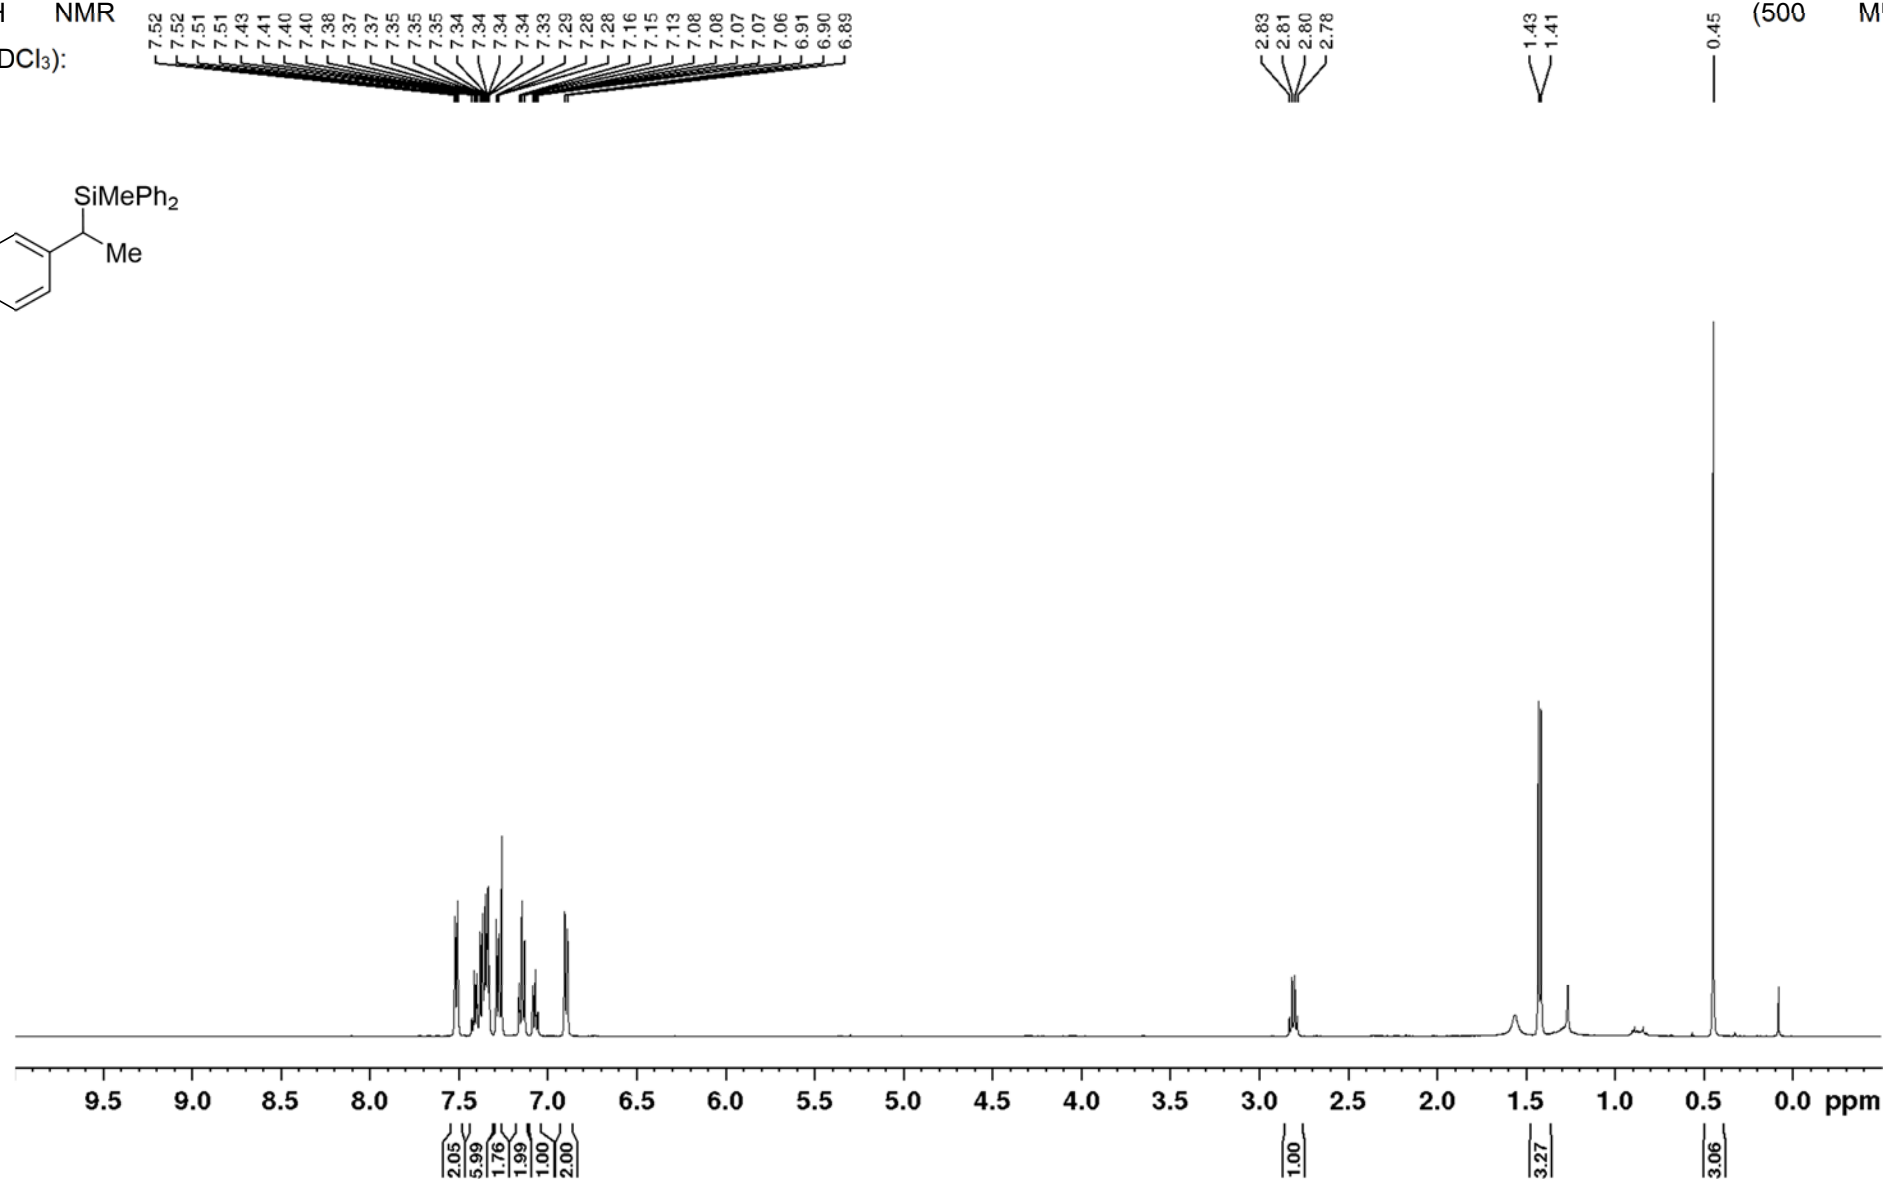



## SUPPORTING INFORMATION

 $^{13}\text{C}\{^1\text{H}\}$  NMR (126 MHz,  $\text{CDCl}_3$ ):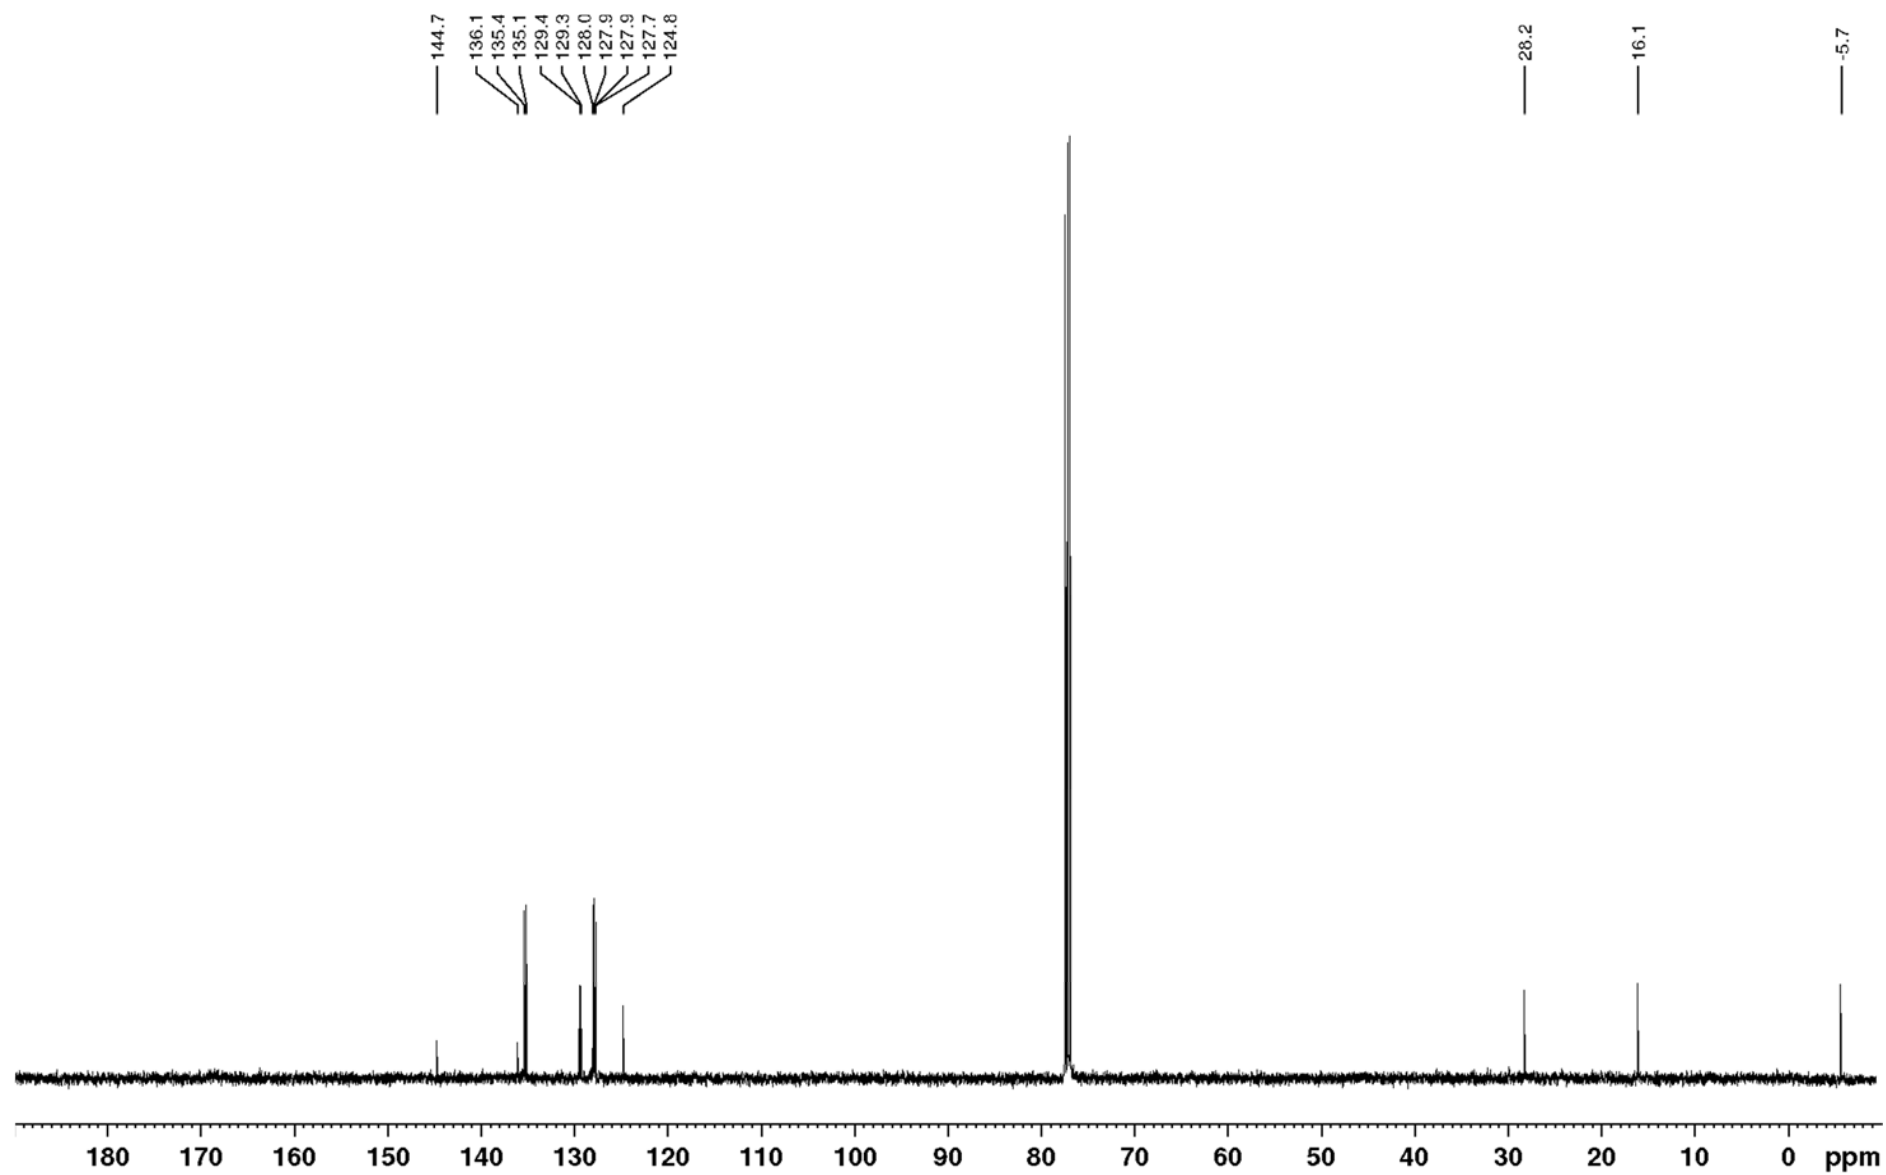

## SUPPORTING INFORMATION

 $^{29}\text{Si}\{^1\text{H}\}$  DEPT NMR (99 MHz,  $\text{CDCl}_3$ ):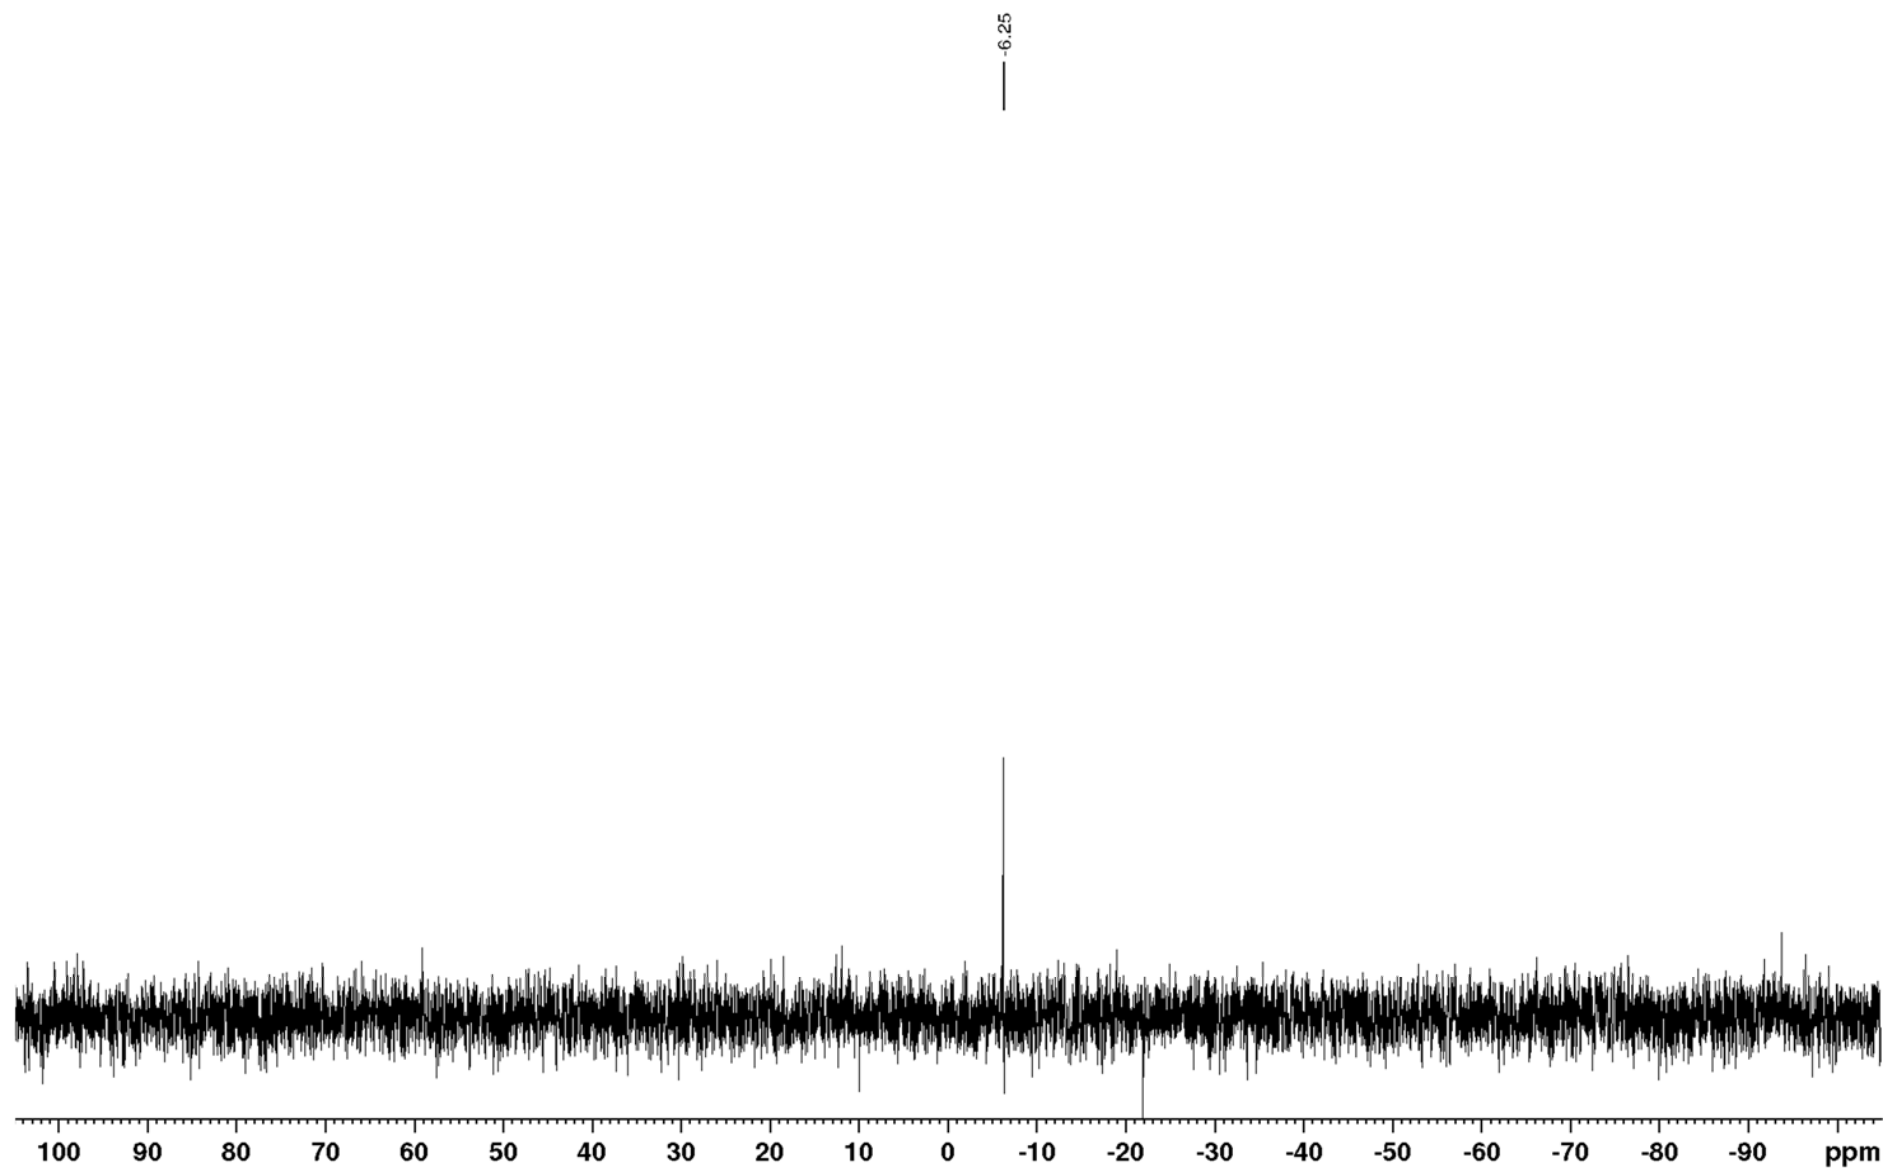

## SUPPORTING INFORMATION

## Triethyl(1-phenylethyl)silane (4ac)

 $^1\text{H}$  NMR (500 MHz,  $\text{CDCl}_3$ ):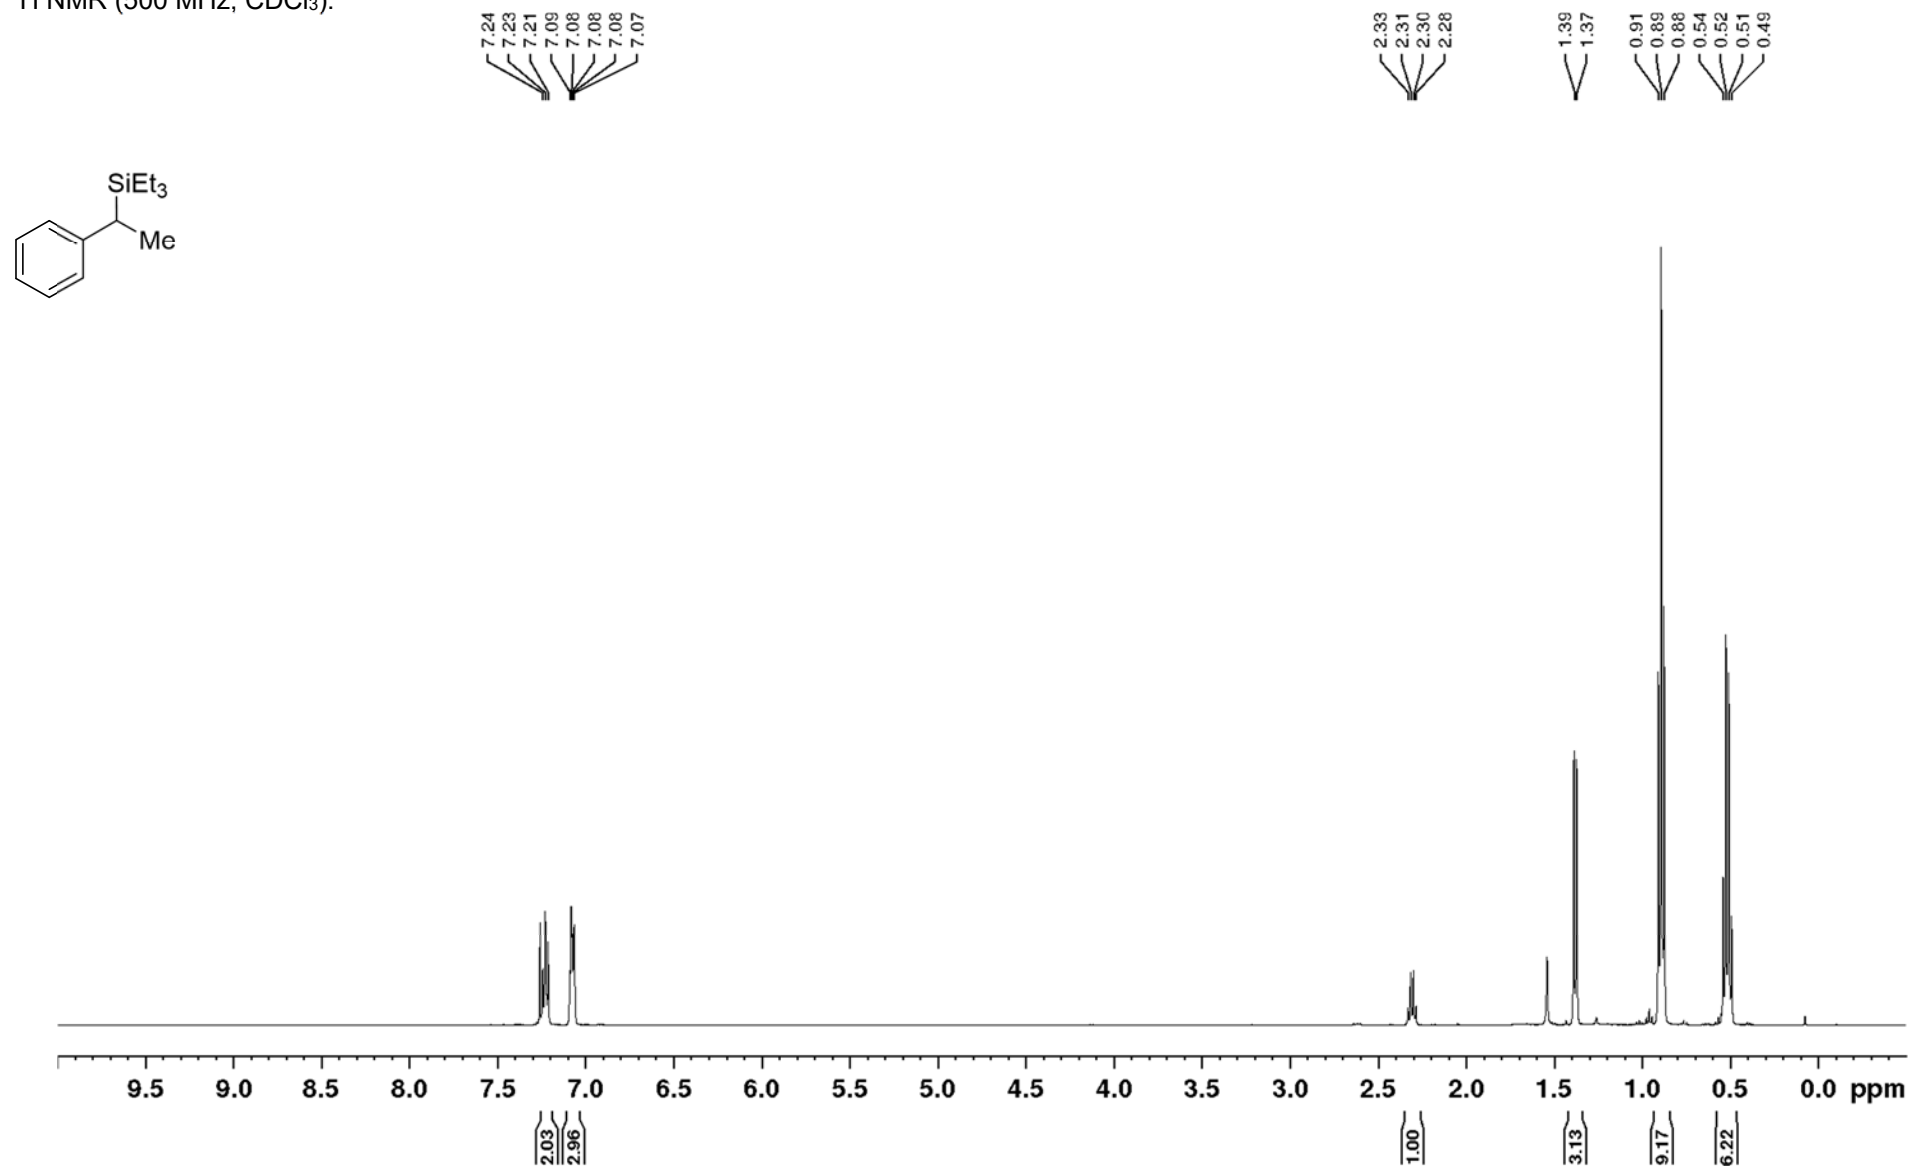

## SUPPORTING INFORMATION

 $^{13}\text{C}\{^1\text{H}\}$  NMR (126 MHz,  $\text{CDCl}_3$ ):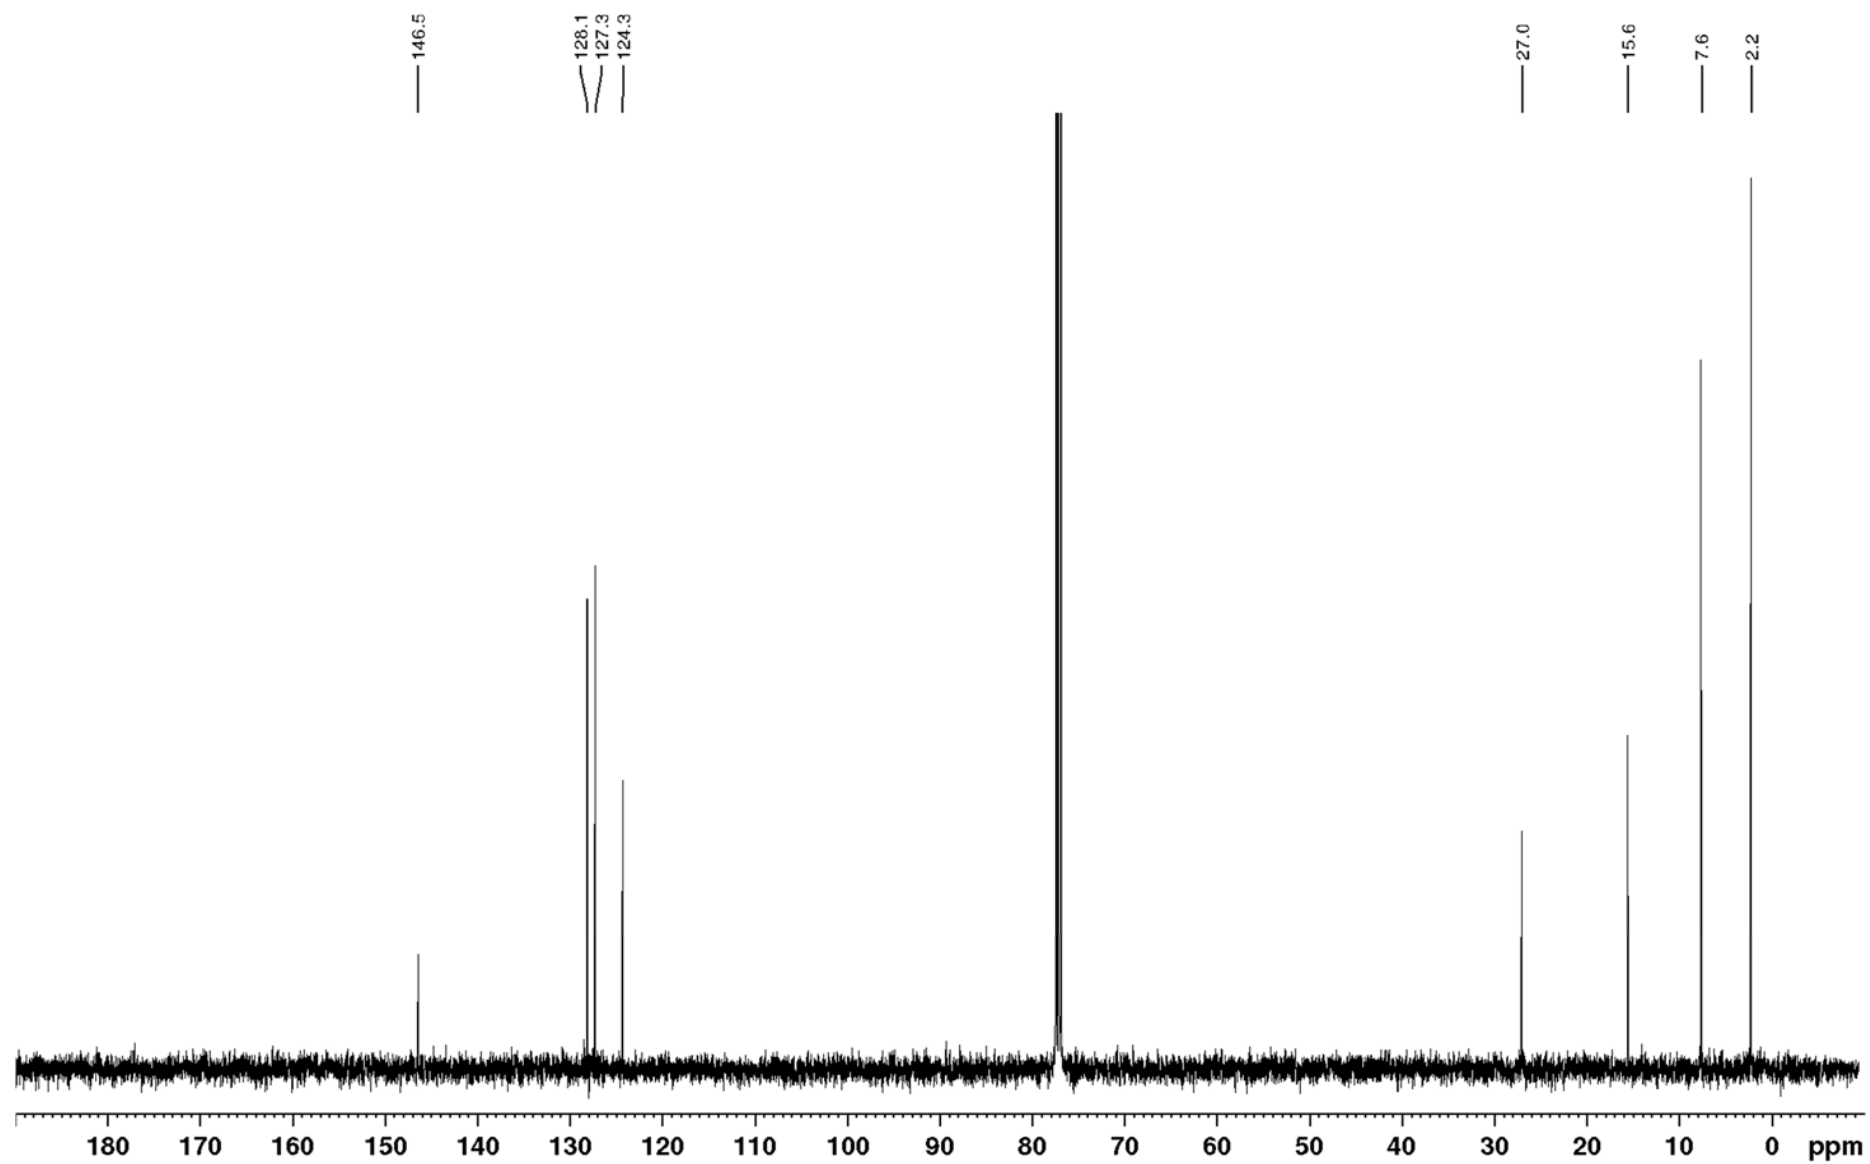

## SUPPORTING INFORMATION

 $^{29}\text{Si}\{^1\text{H}\}$  DEPT NMR (99 MHz,  $\text{CDCl}_3$ ):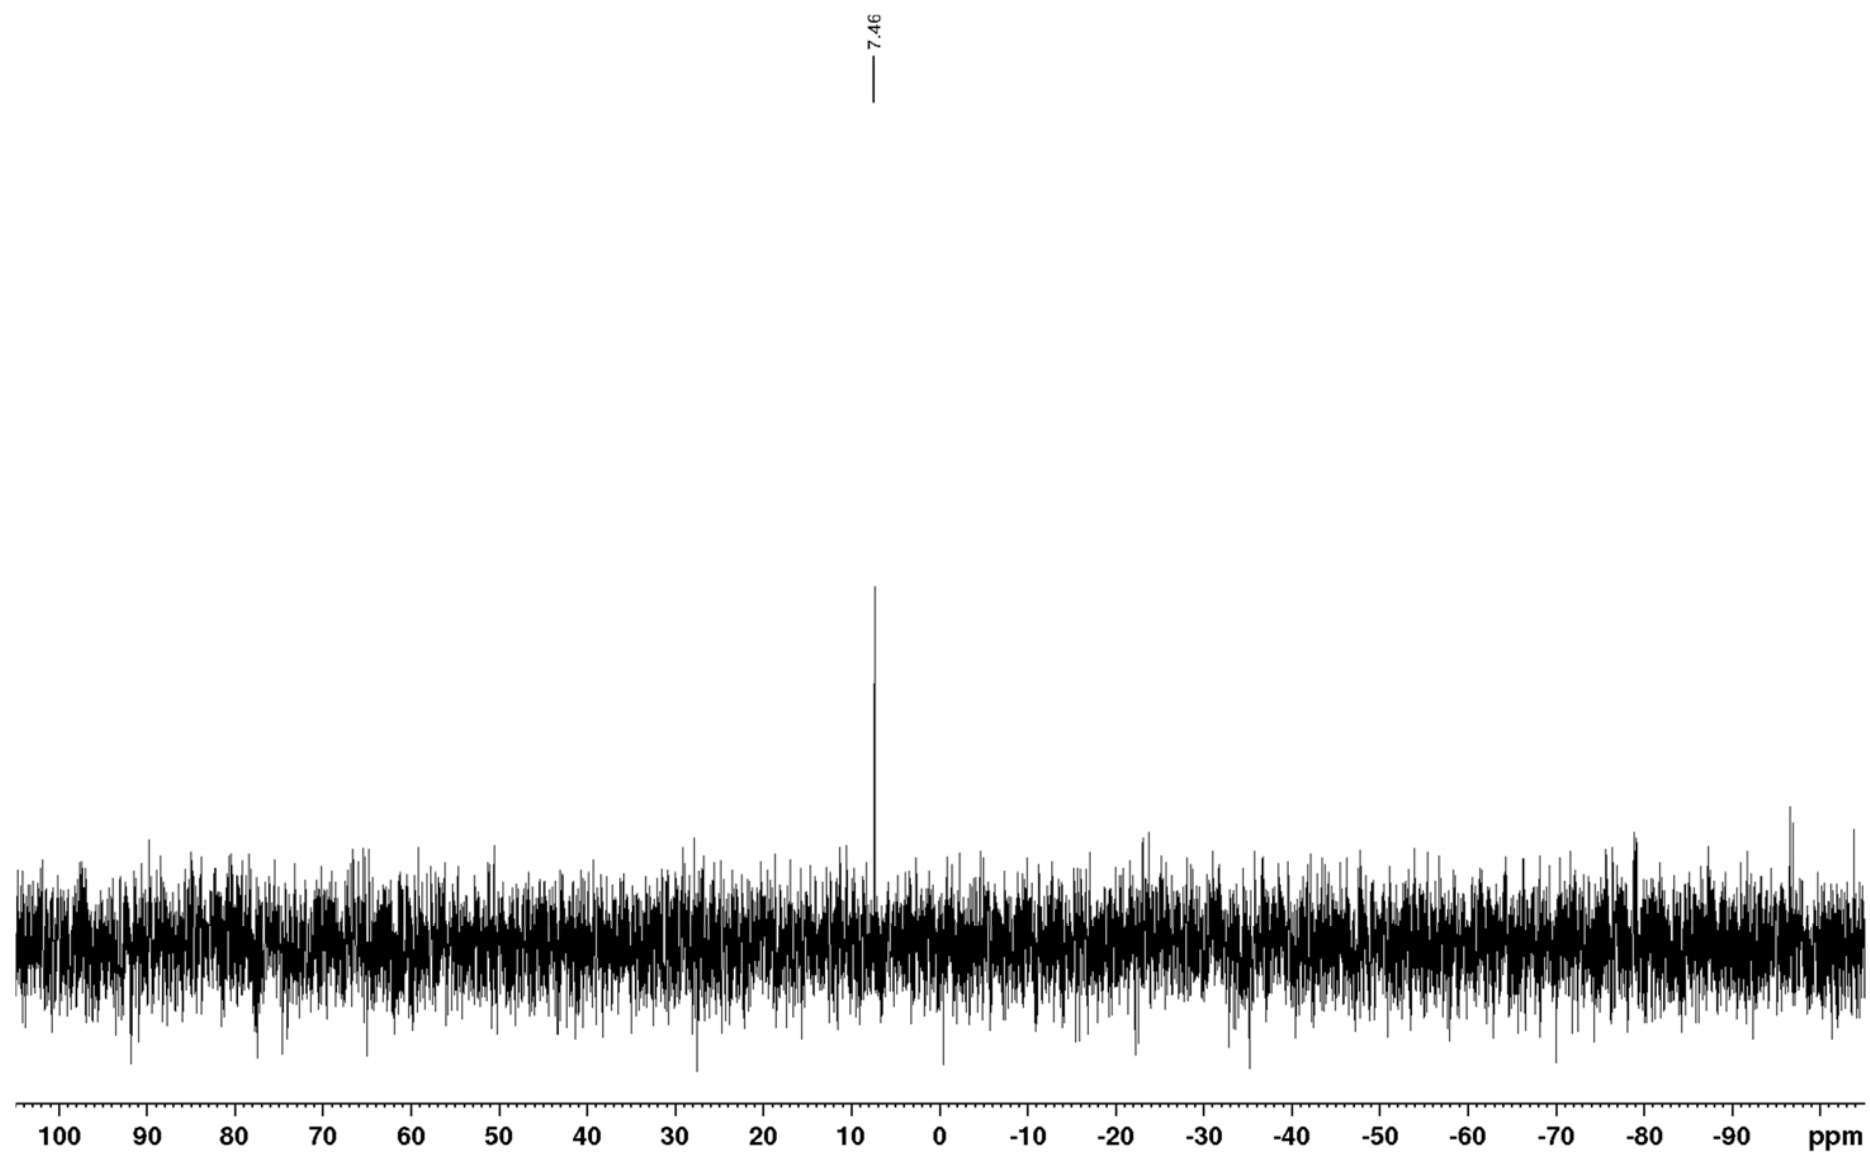

## SUPPORTING INFORMATION

## Dimethyl(phenyl)[1-(p-tolyl)ethyl]silane (4ba)

 $^1\text{H}$  NMR (500 MHz,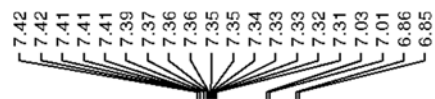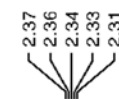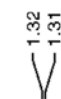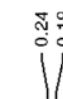 $\text{CDCl}_3$ :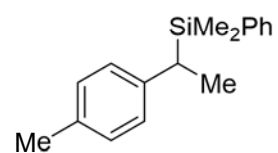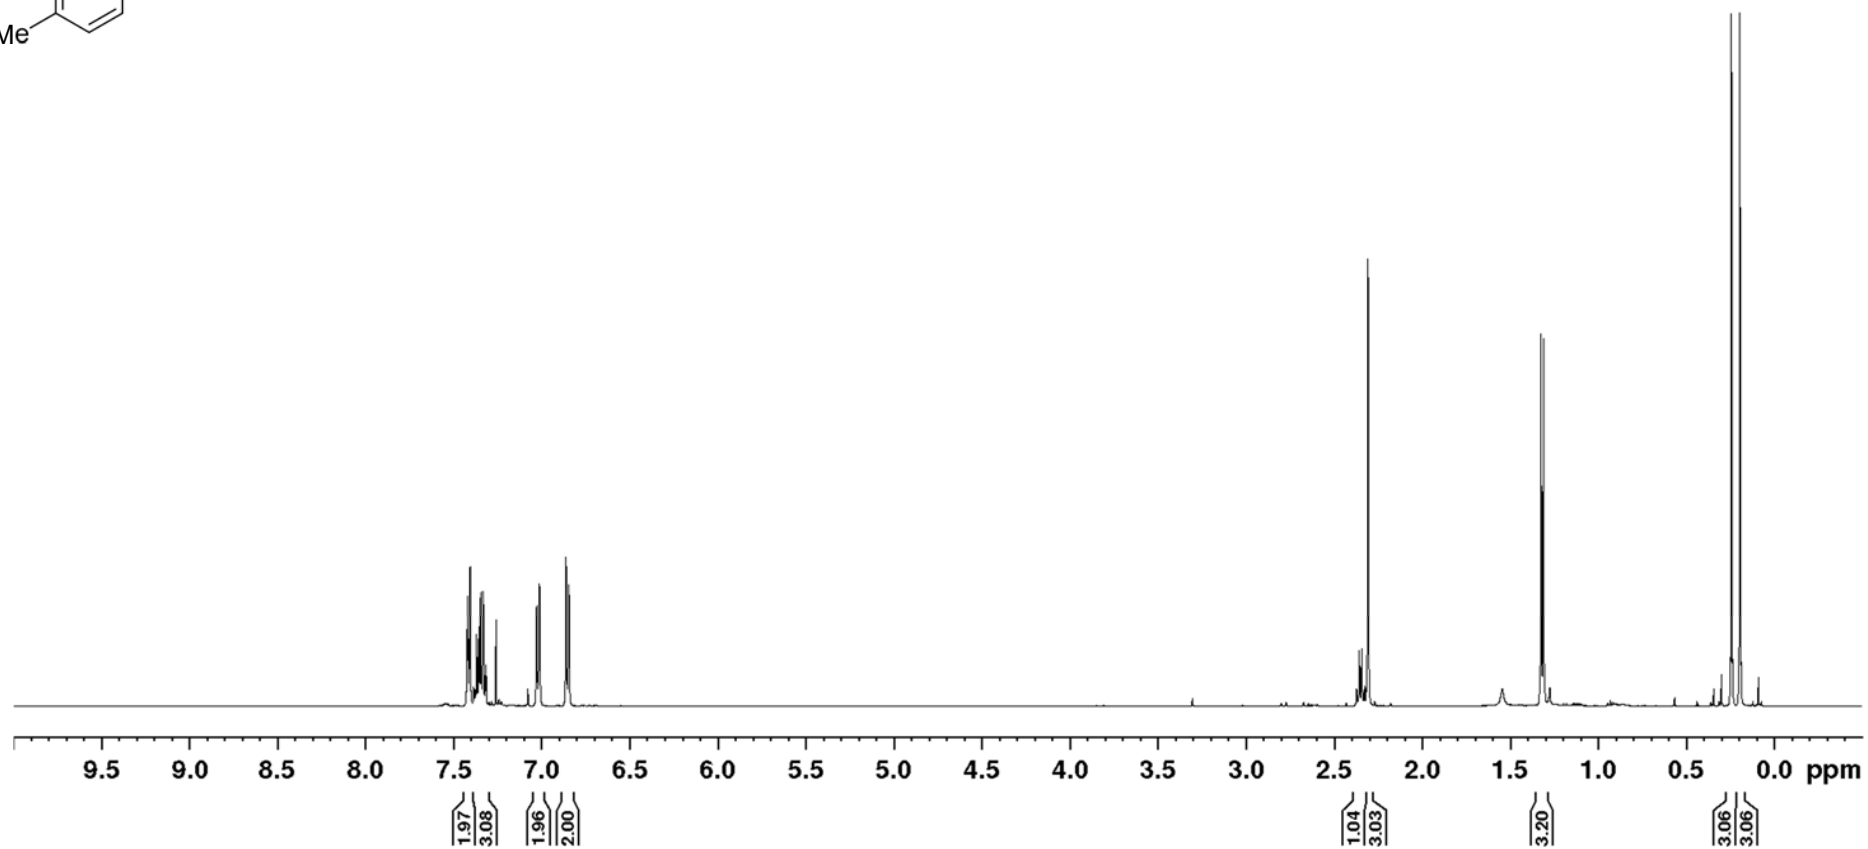

## SUPPORTING INFORMATION

 $^{13}\text{C}\{^1\text{H}\}$  NMR (126 MHz,  $\text{CDCl}_3$ ):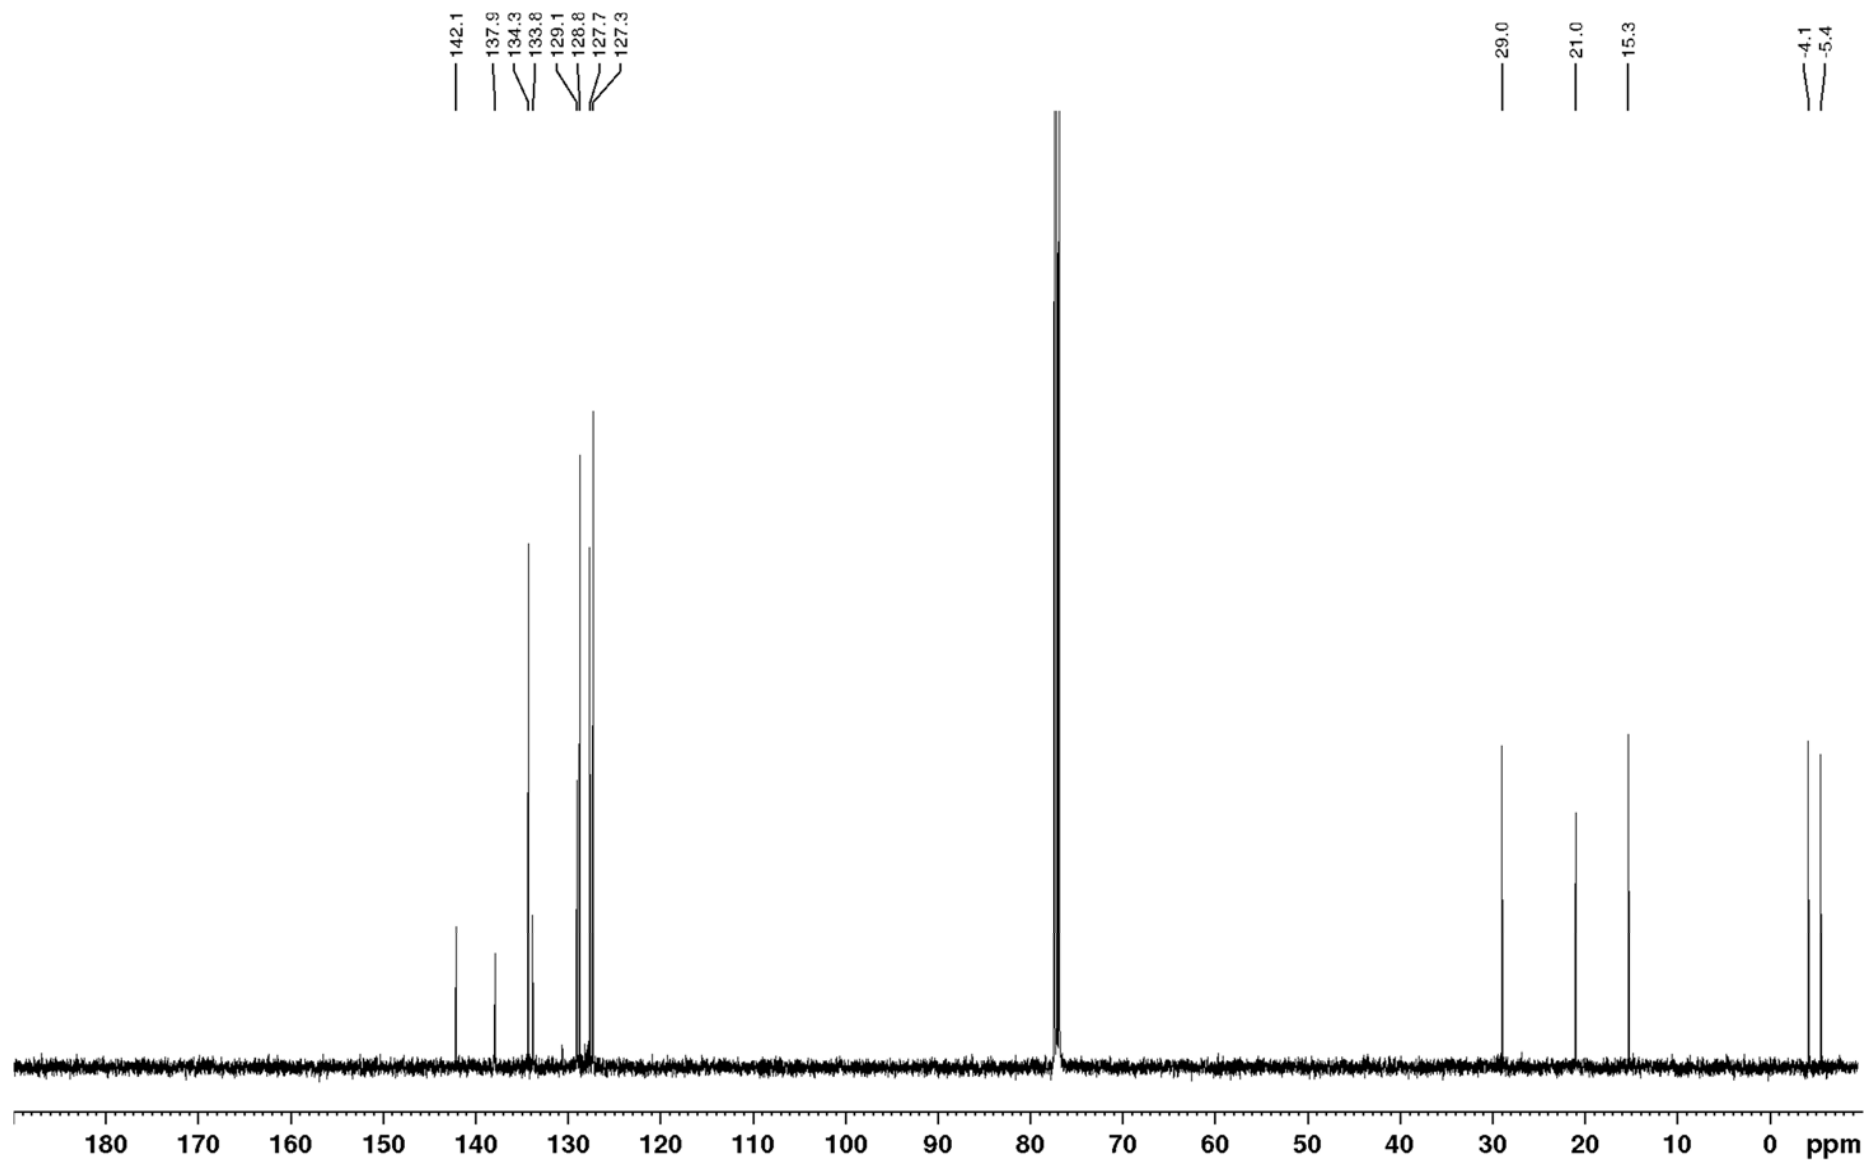

## SUPPORTING INFORMATION

 $^{29}\text{Si}\{^1\text{H}\}$  DEPT NMR (99 MHz,  $\text{CDCl}_3$ ):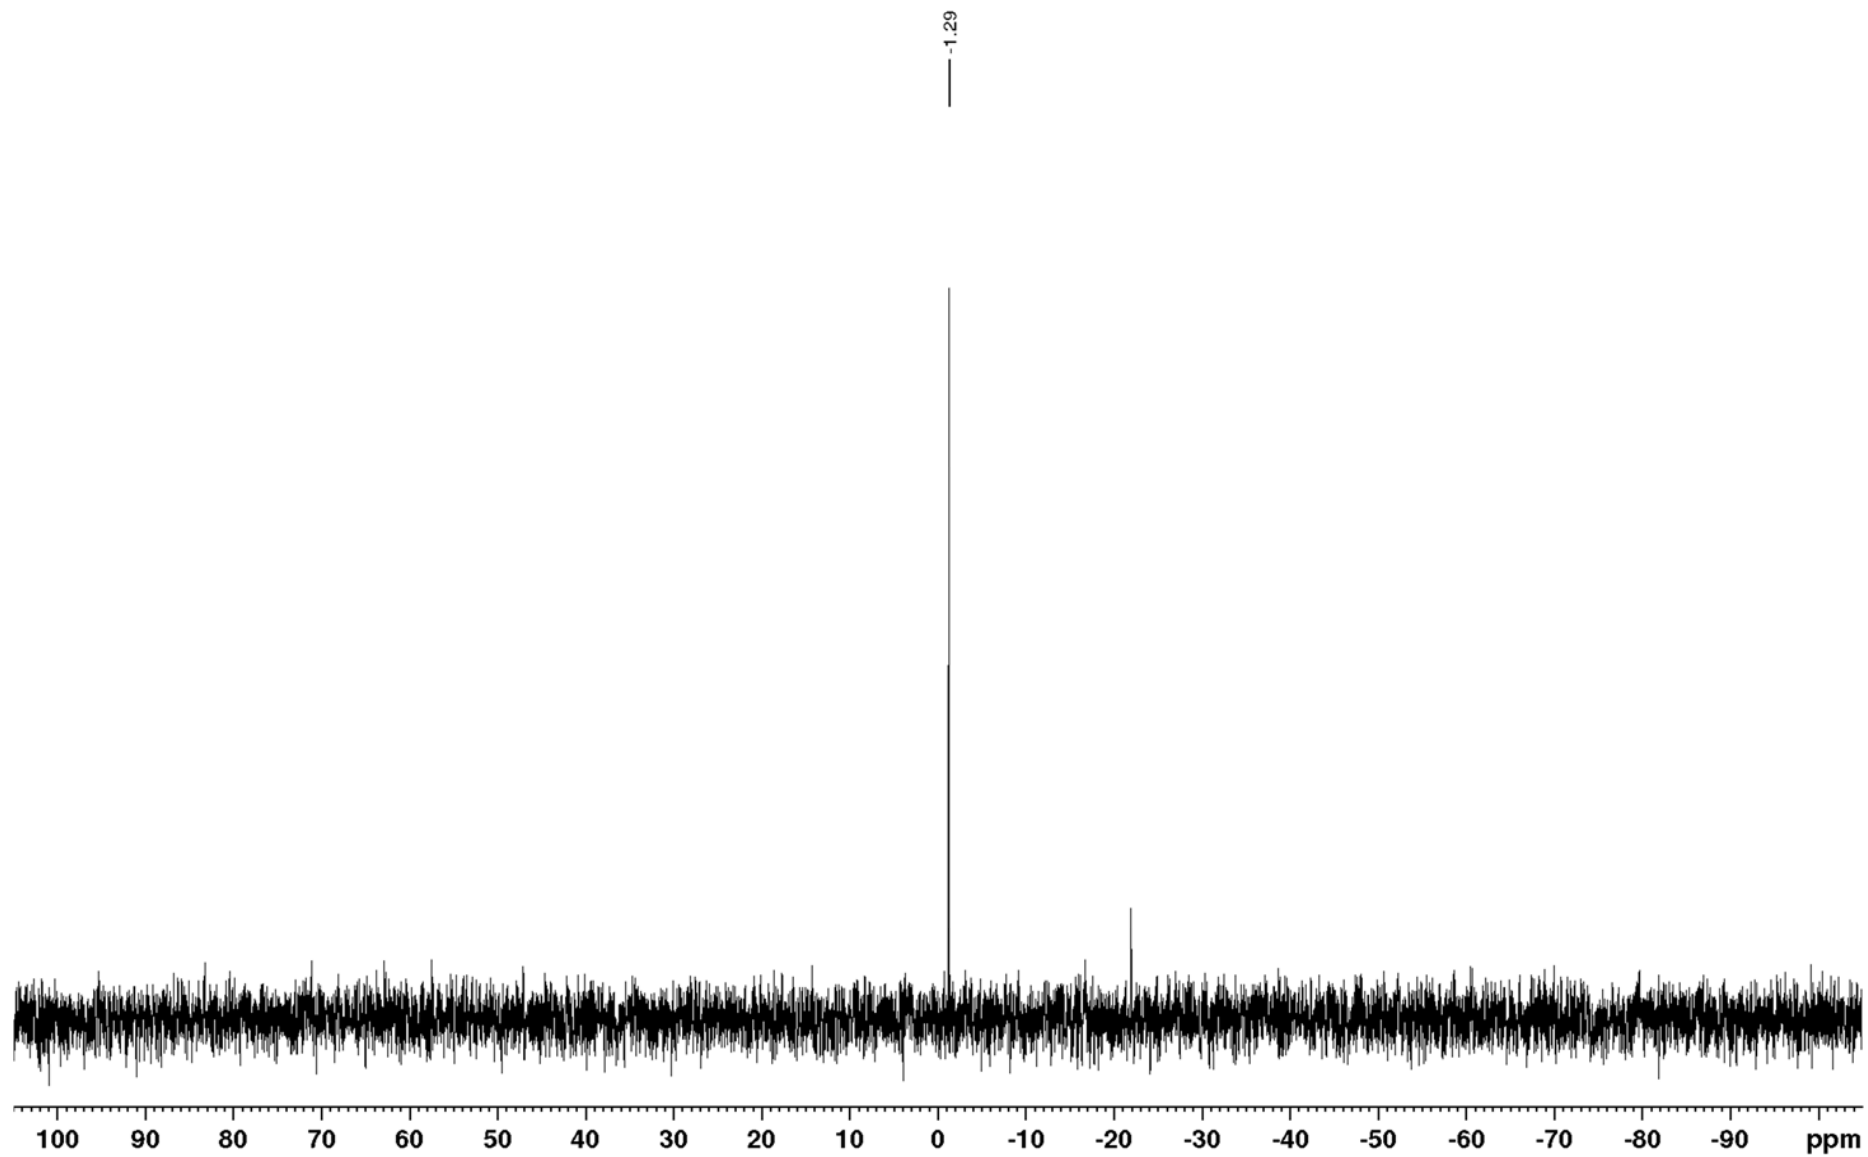



## SUPPORTING INFORMATION

## Dimethyl(phenyl)[1-(m-tolyl)ethyl]silane (4ca)

 $^1\text{H}$  NMR (500  
 $\text{CDCl}_3$ ):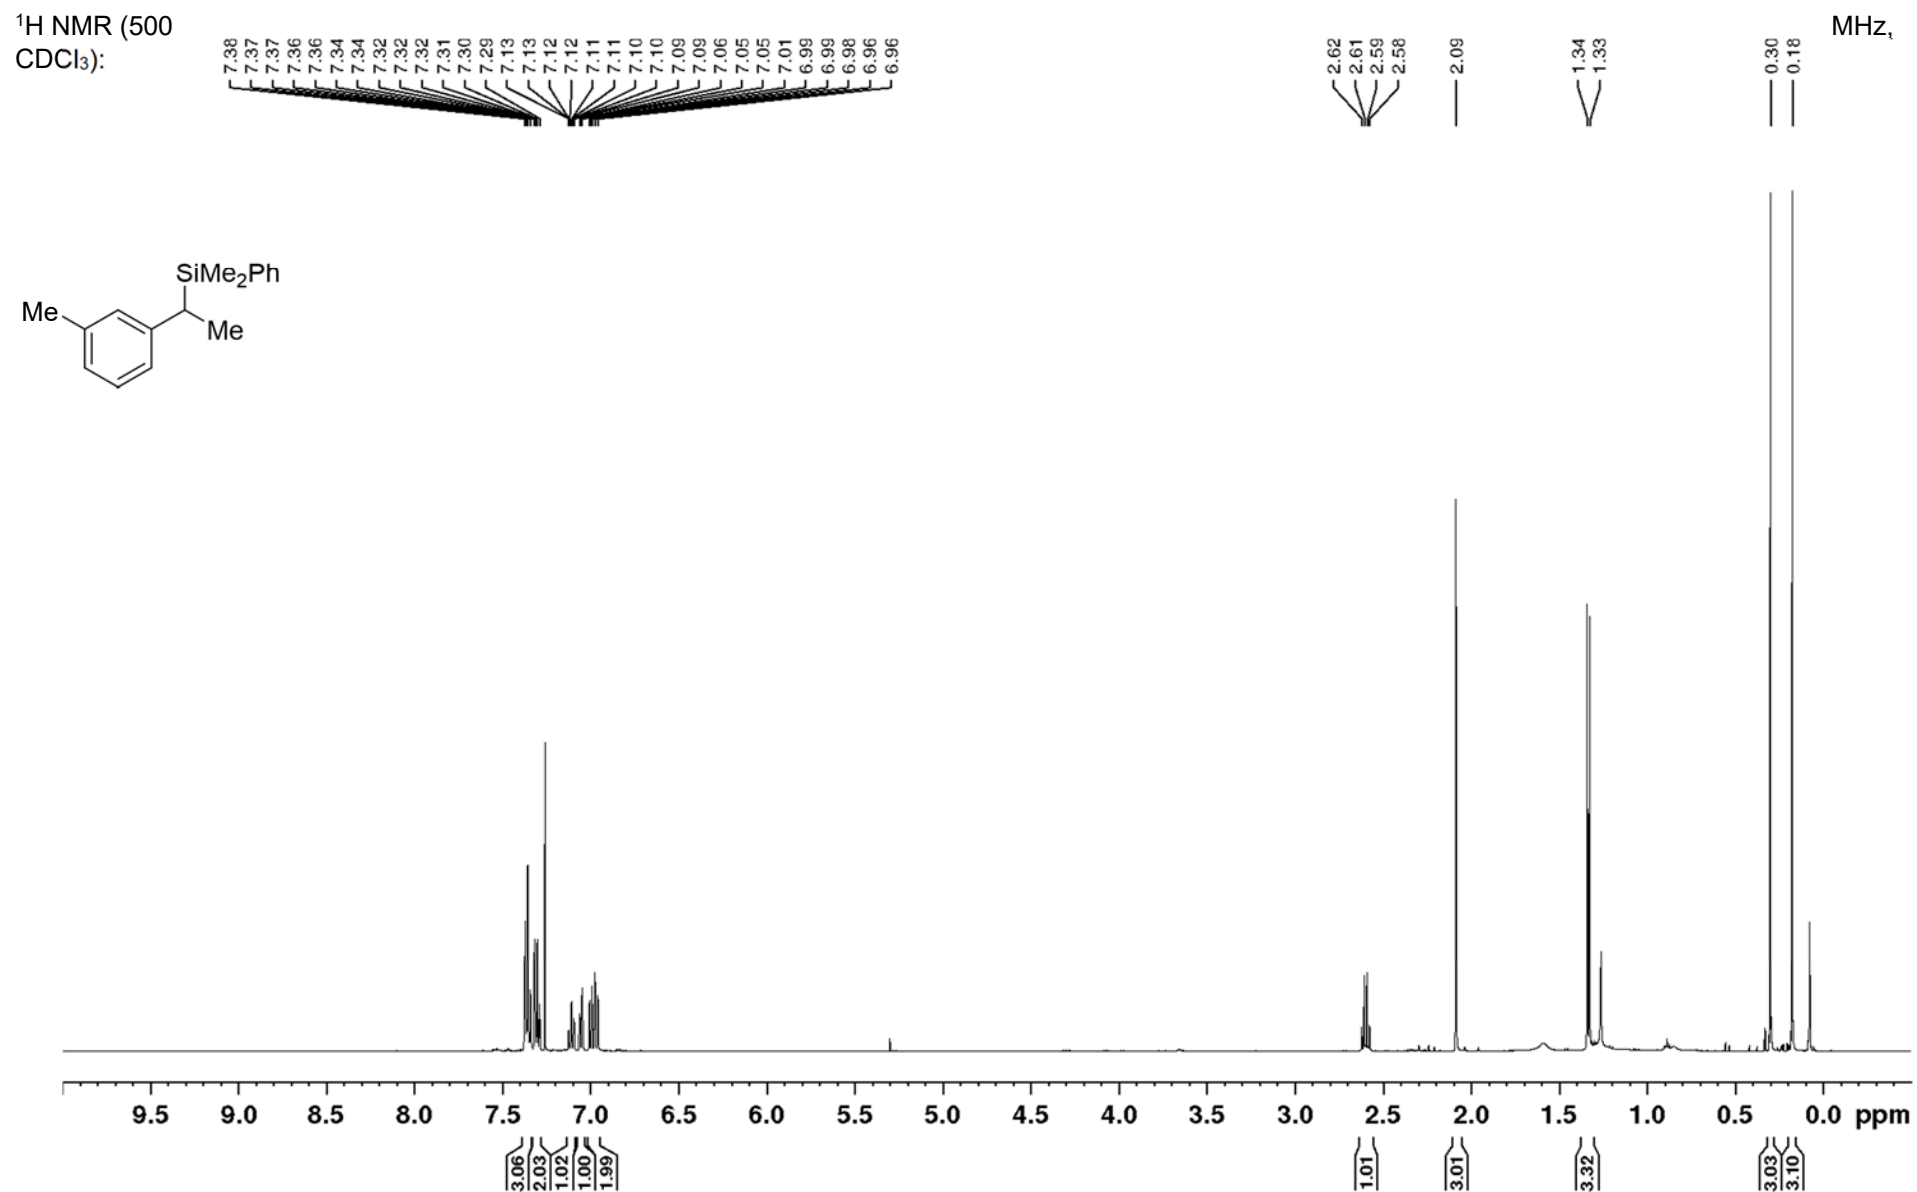

## SUPPORTING INFORMATION

 $^{13}\text{C}\{^1\text{H}\}$  NMR (126 MHz,  $\text{CDCl}_3$ ):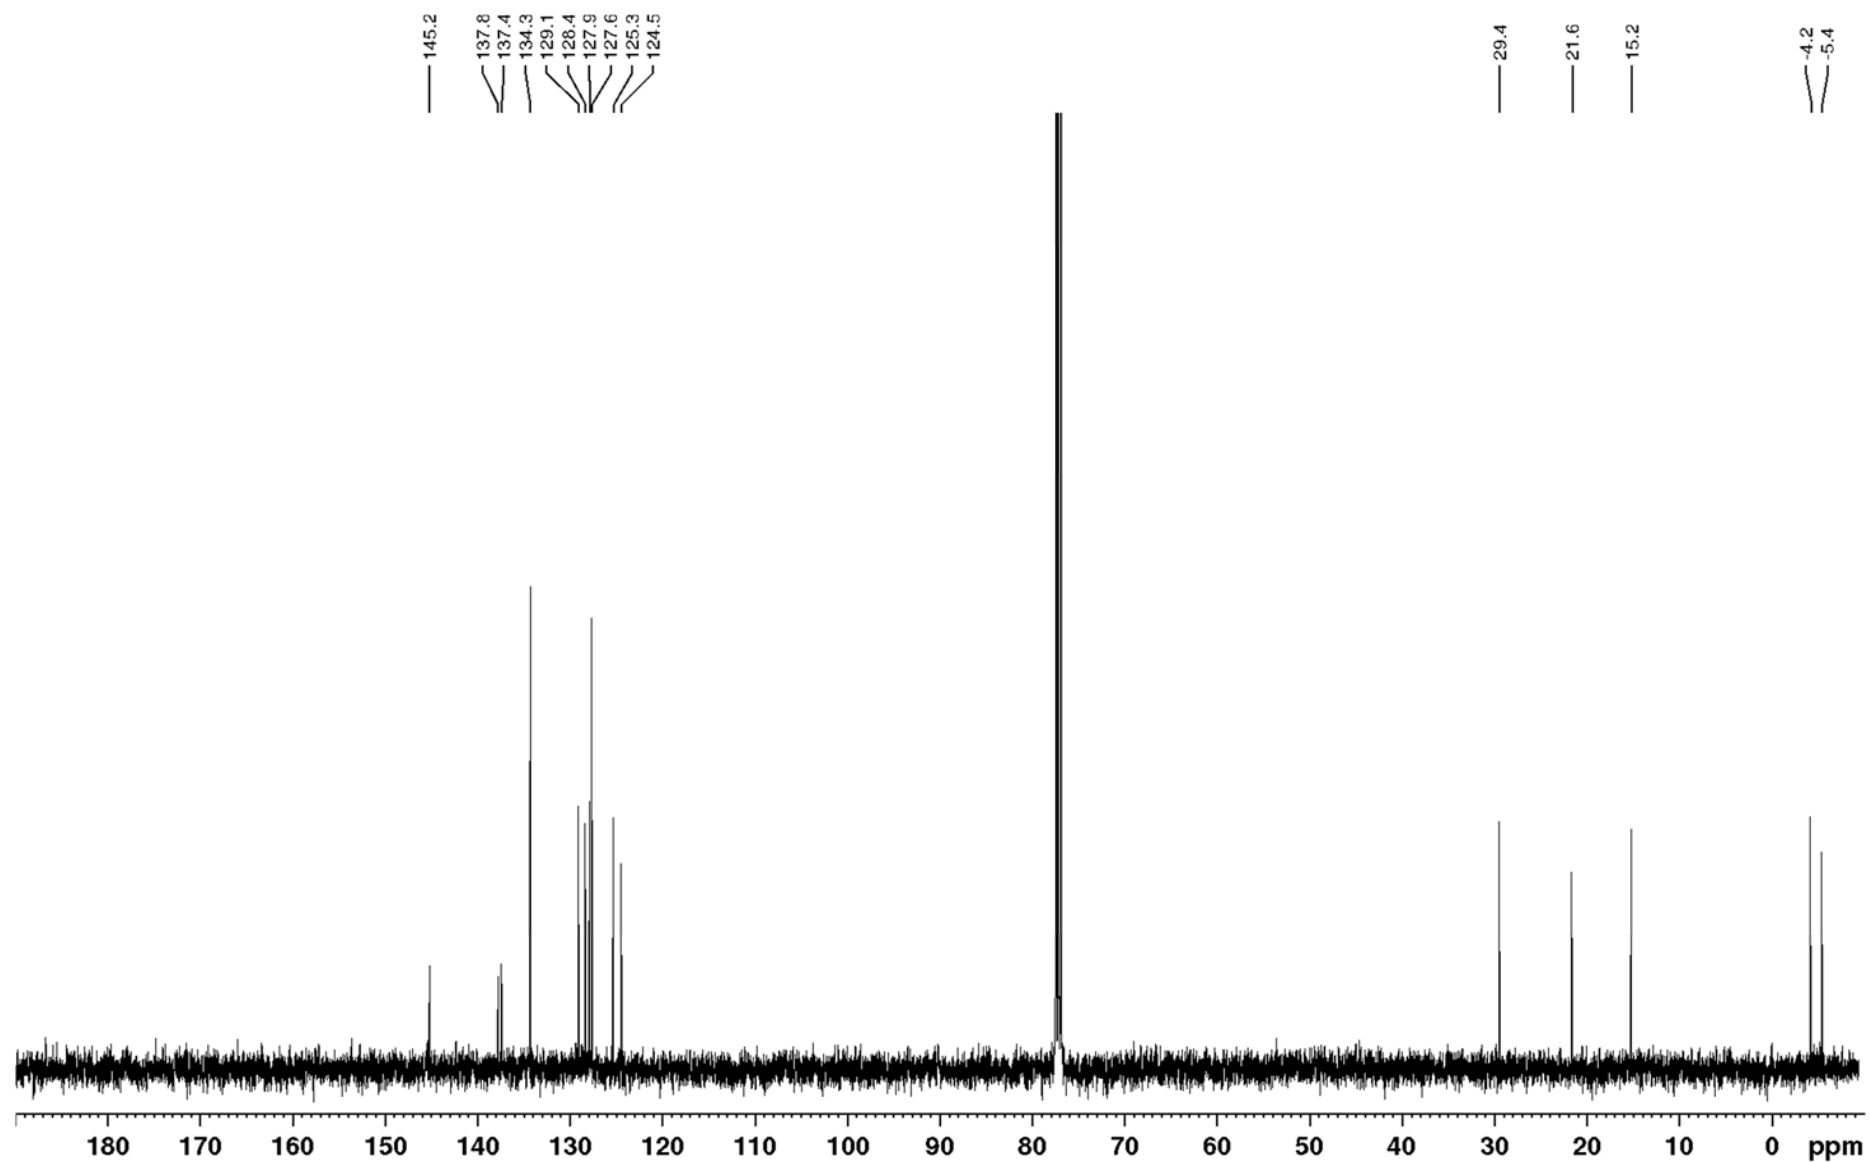

## SUPPORTING INFORMATION

 $^{29}\text{Si}\{^1\text{H}\}$  DEPT NMR (99 MHz,  $\text{CDCl}_3$ ):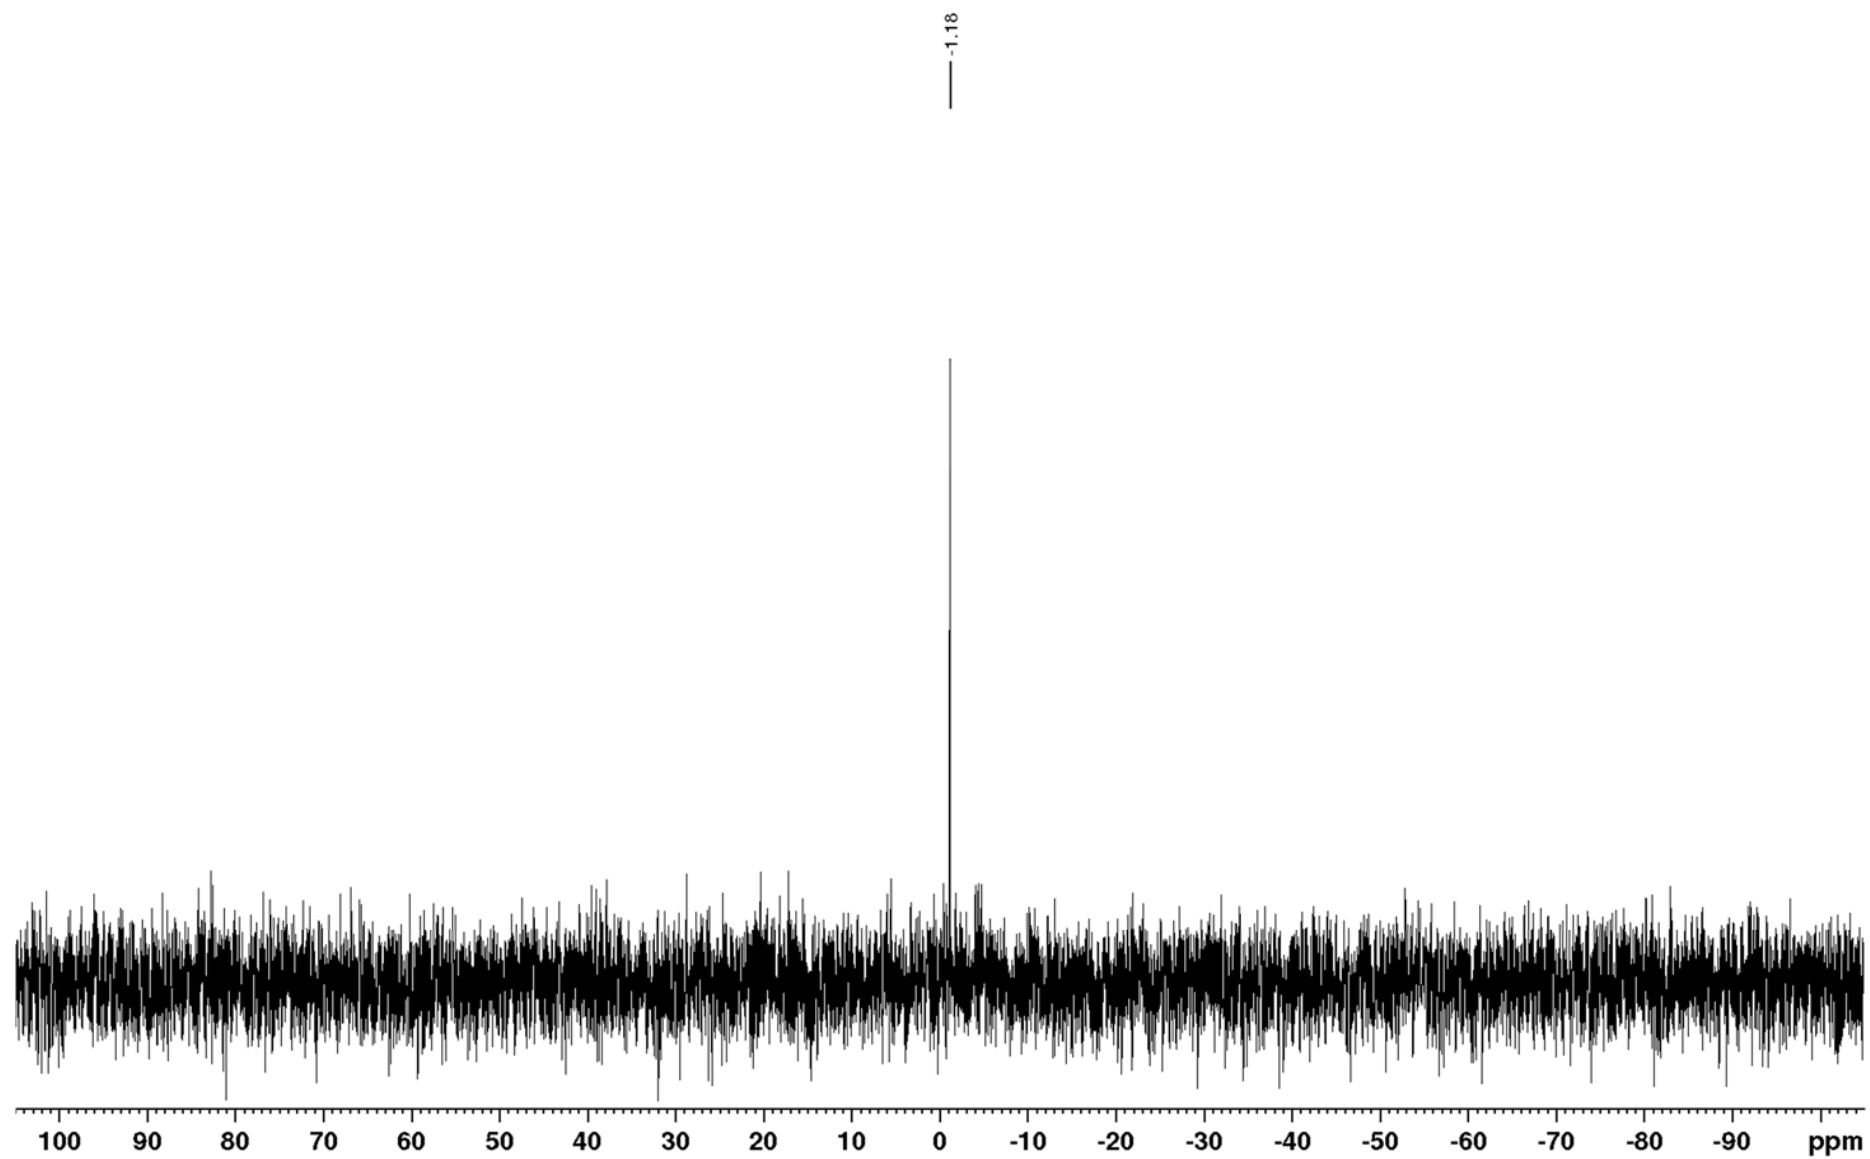

## SUPPORTING INFORMATION

## Dimethyl(phenyl)[1-(o-tolyl)ethyl]silane (4da)

<sup>1</sup>H NMR (500  
CDCl<sub>3</sub>):

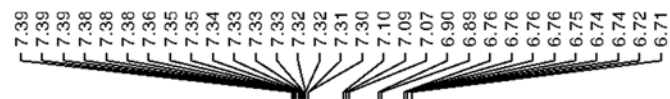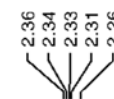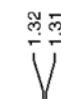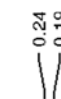

MHz,

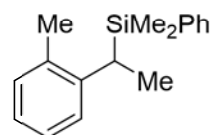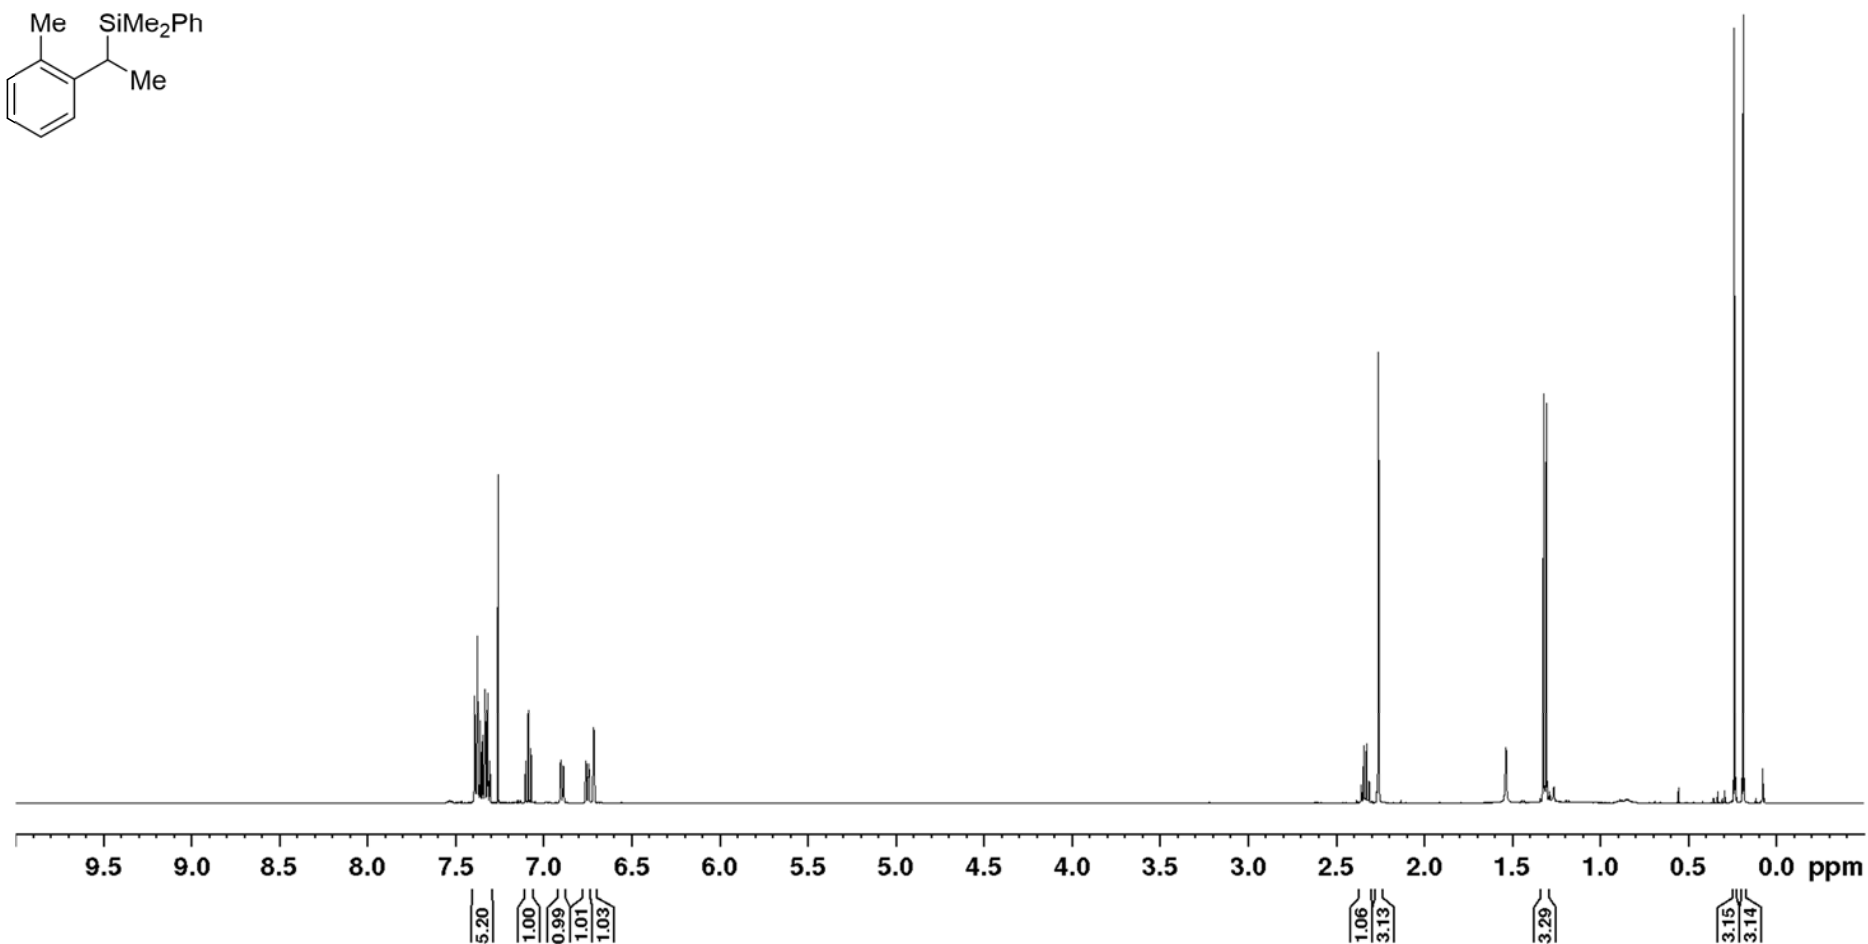

## SUPPORTING INFORMATION

 $^{13}\text{C}\{^1\text{H}\}$  NMR (126 MHz,  $\text{CDCl}_3$ ):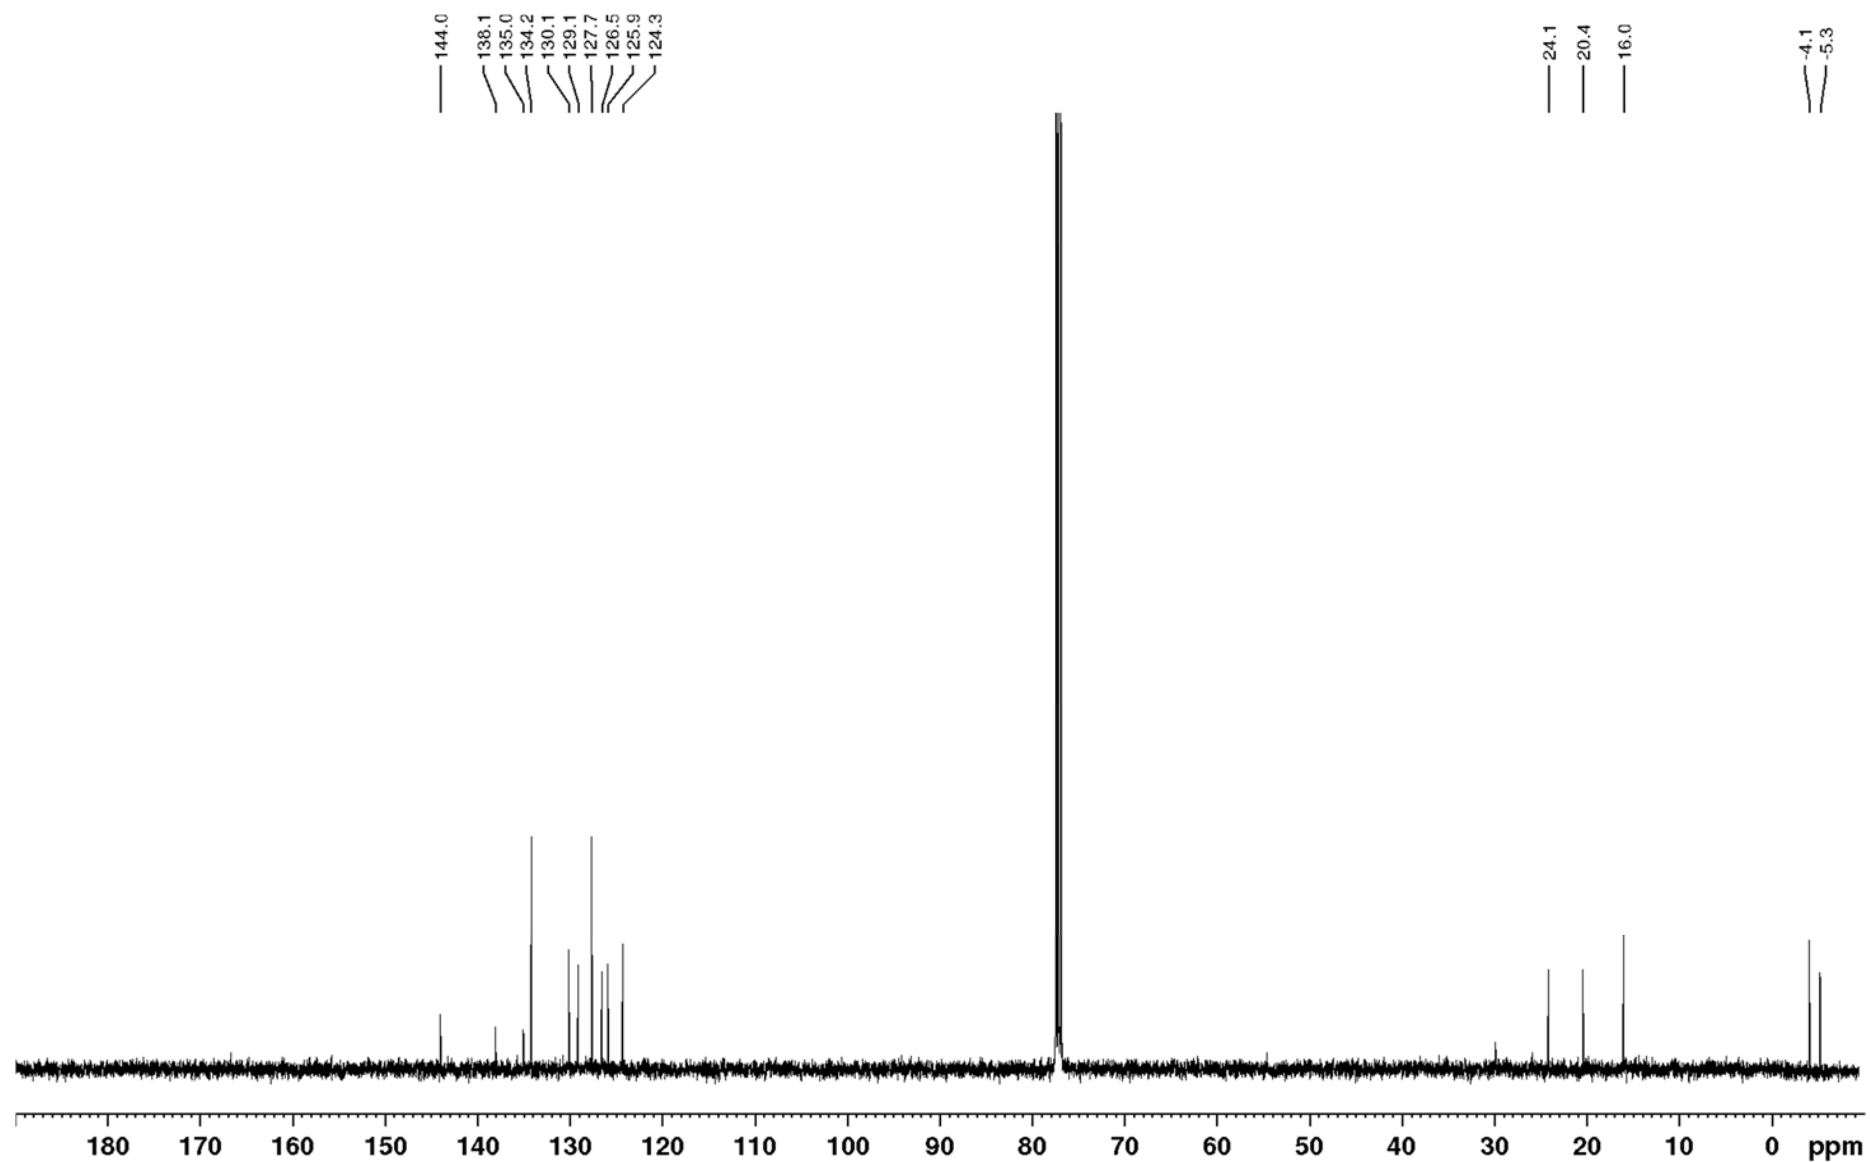

## SUPPORTING INFORMATION

 $^{29}\text{Si}\{^1\text{H}\}$  DEPT NMR (99 MHz,  $\text{CDCl}_3$ ):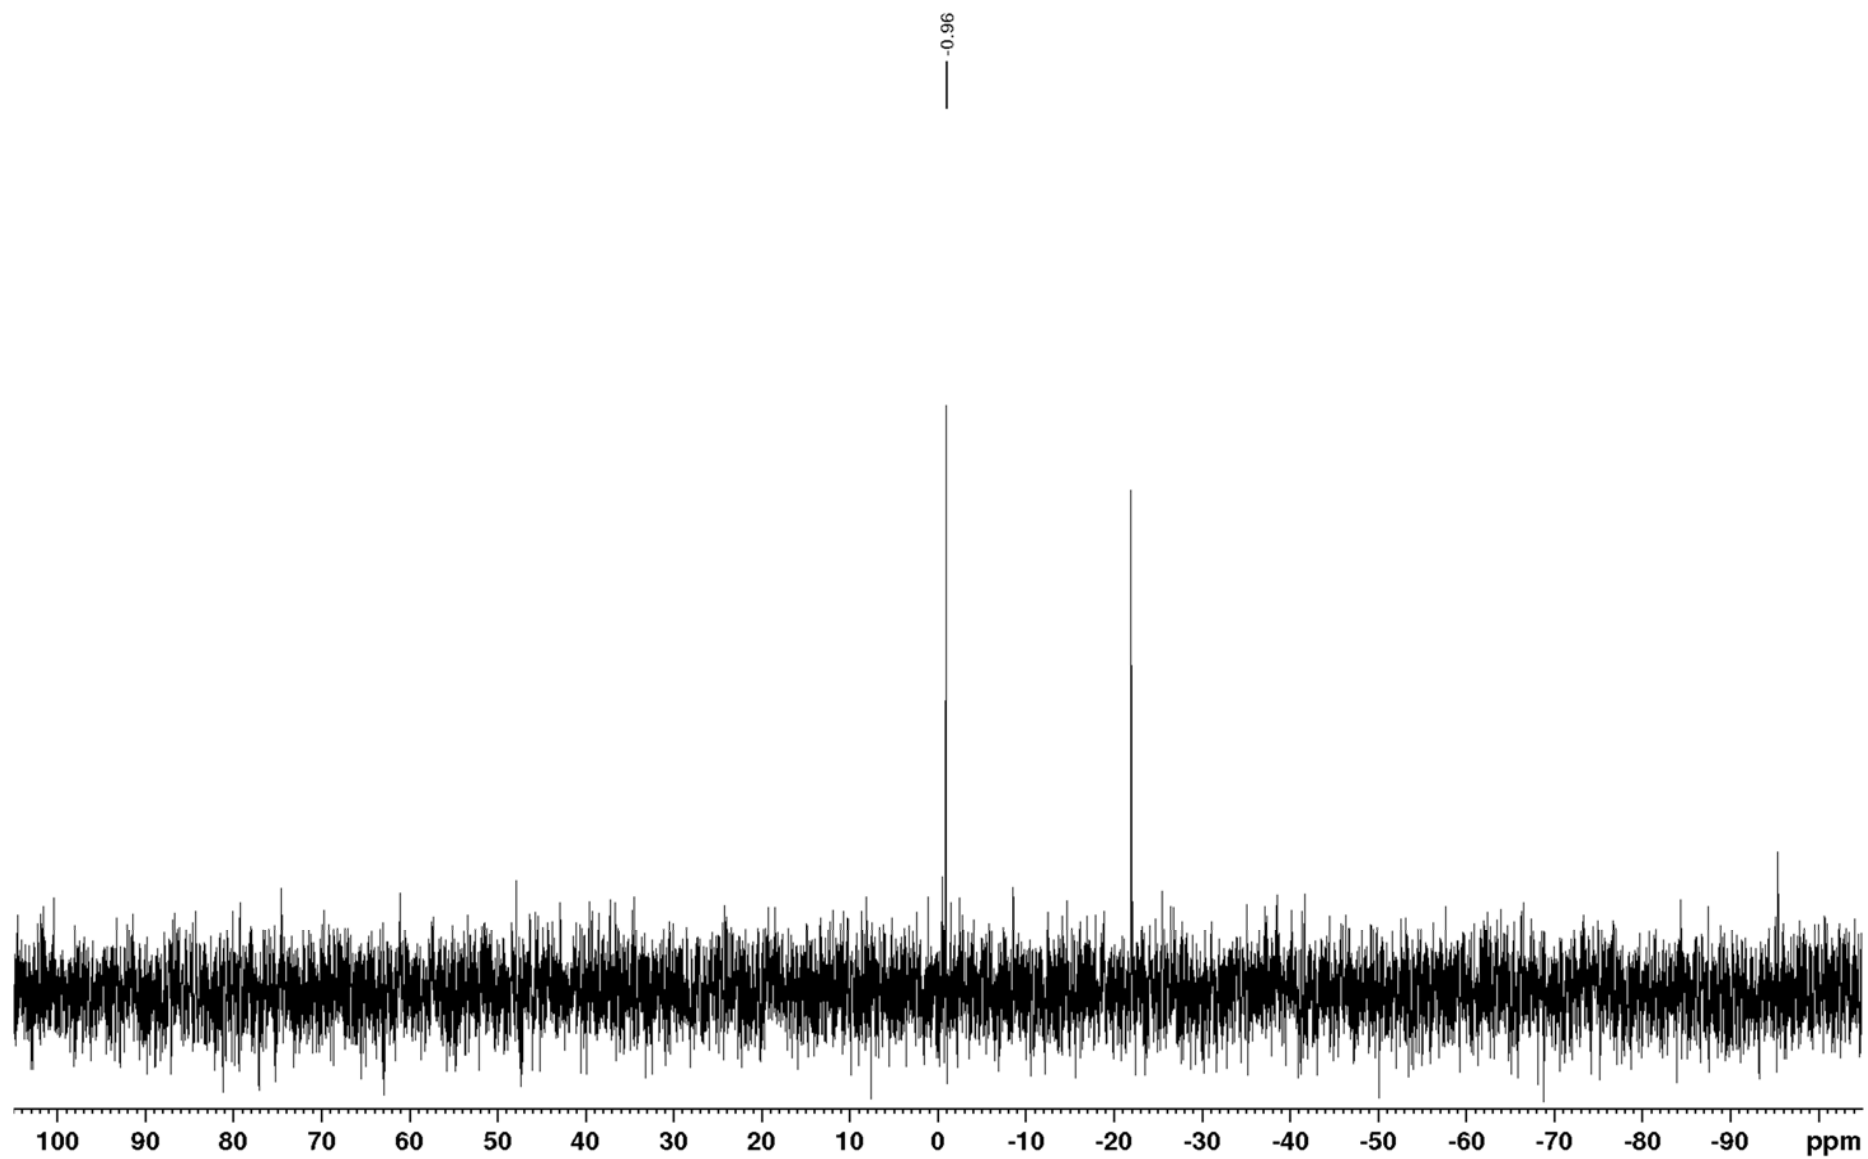

## SUPPORTING INFORMATION

**{1-[(1,1'-Biphenyl)-4-yl]ethyl}dimethyl(phenyl)silane (4ea)**<sup>1</sup>H NMR (500 MHz,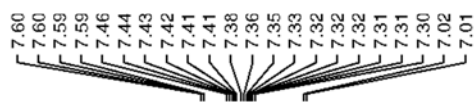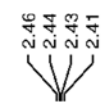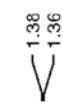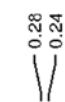CDCl<sub>3</sub>):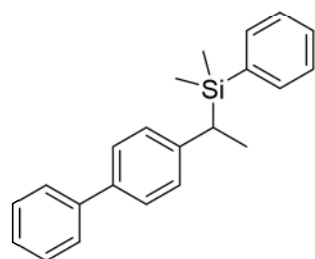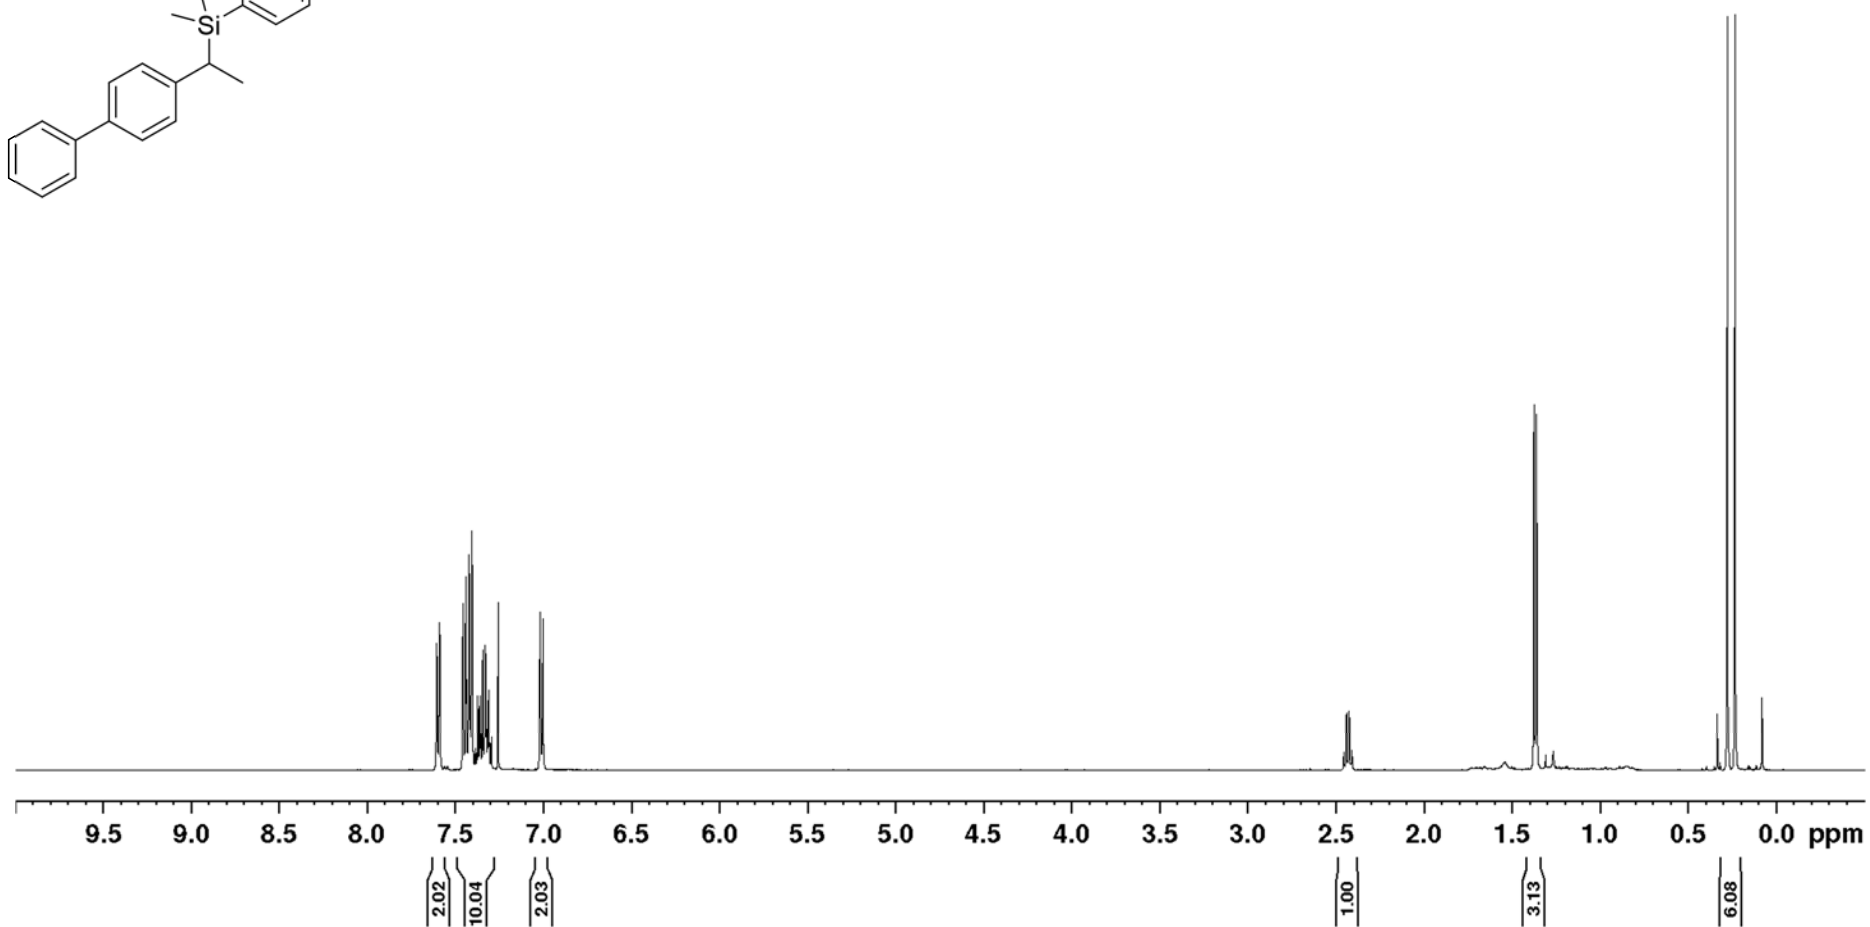

## SUPPORTING INFORMATION

 $^{13}\text{C}\{^1\text{H}\}$  NMR (126 MHz,  $\text{CDCl}_3$ ):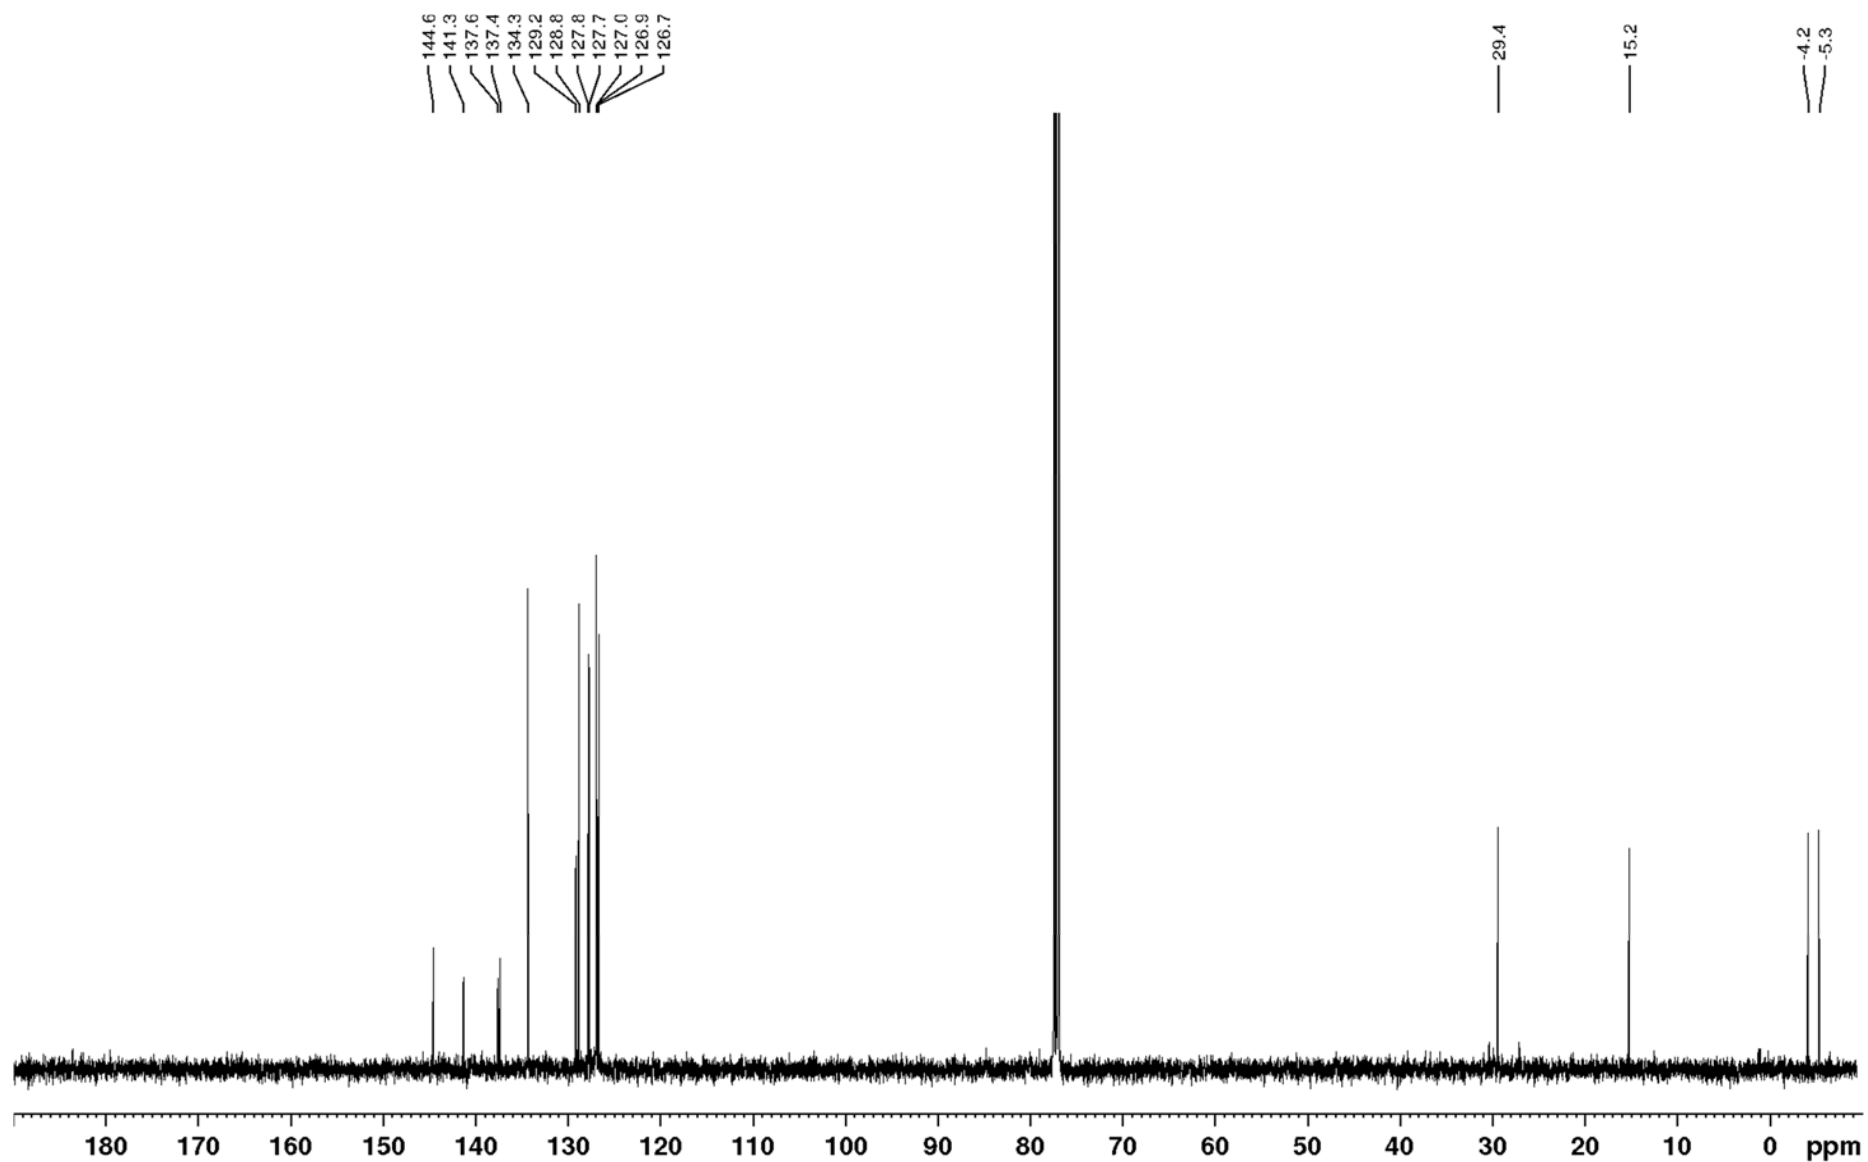



## SUPPORTING INFORMATION

 $^{29}\text{Si}\{^1\text{H}\}$  DEPT NMR (99 MHz,  $\text{CDCl}_3$ ):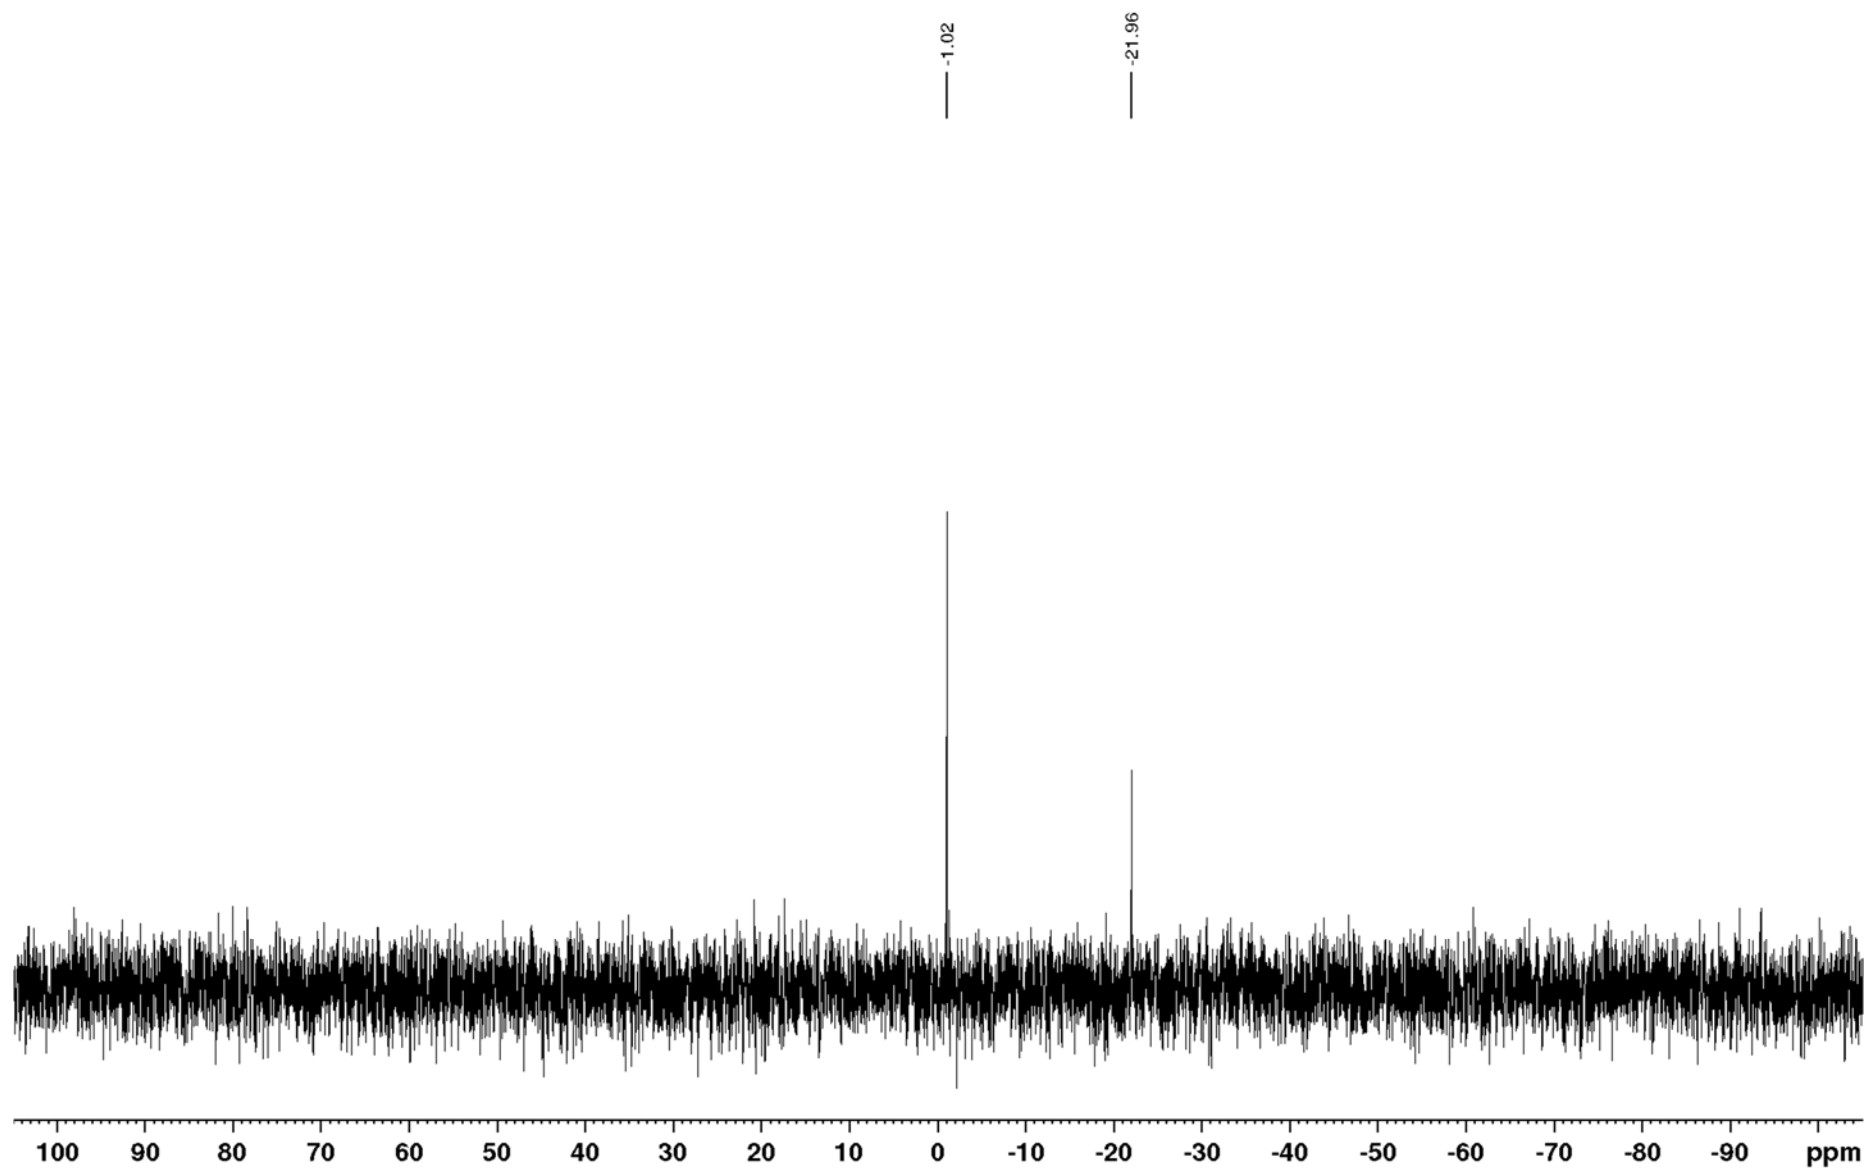

## SUPPORTING INFORMATION

**[1-(4-Methoxyphenyl)ethyl]dimethyl(phenyl)silane (4fa)**<sup>1</sup>H NMR (500  
CDCl<sub>3</sub>):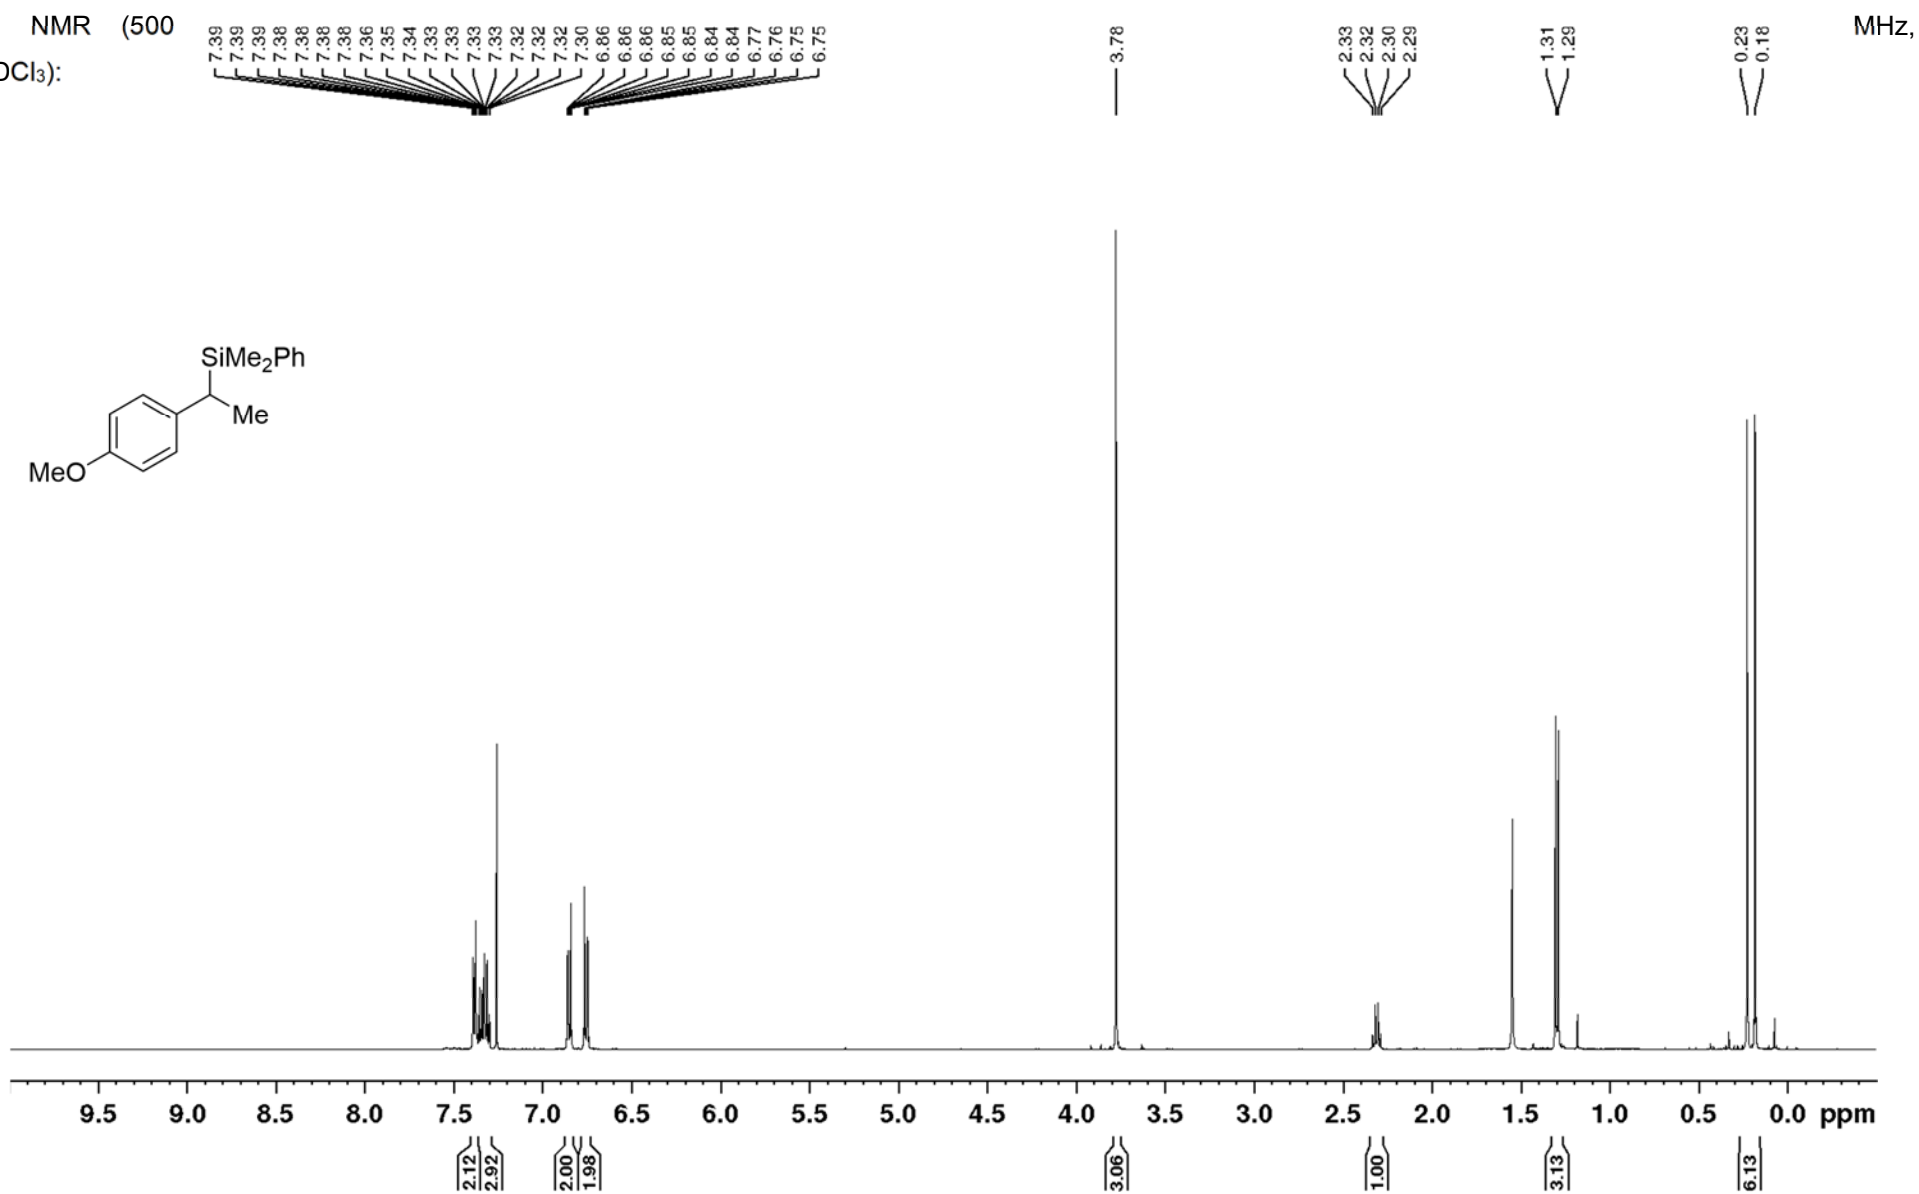

## SUPPORTING INFORMATION

 $^{13}\text{C}\{^1\text{H}\}$  NMR (126 MHz,  $\text{CDCl}_3$ ):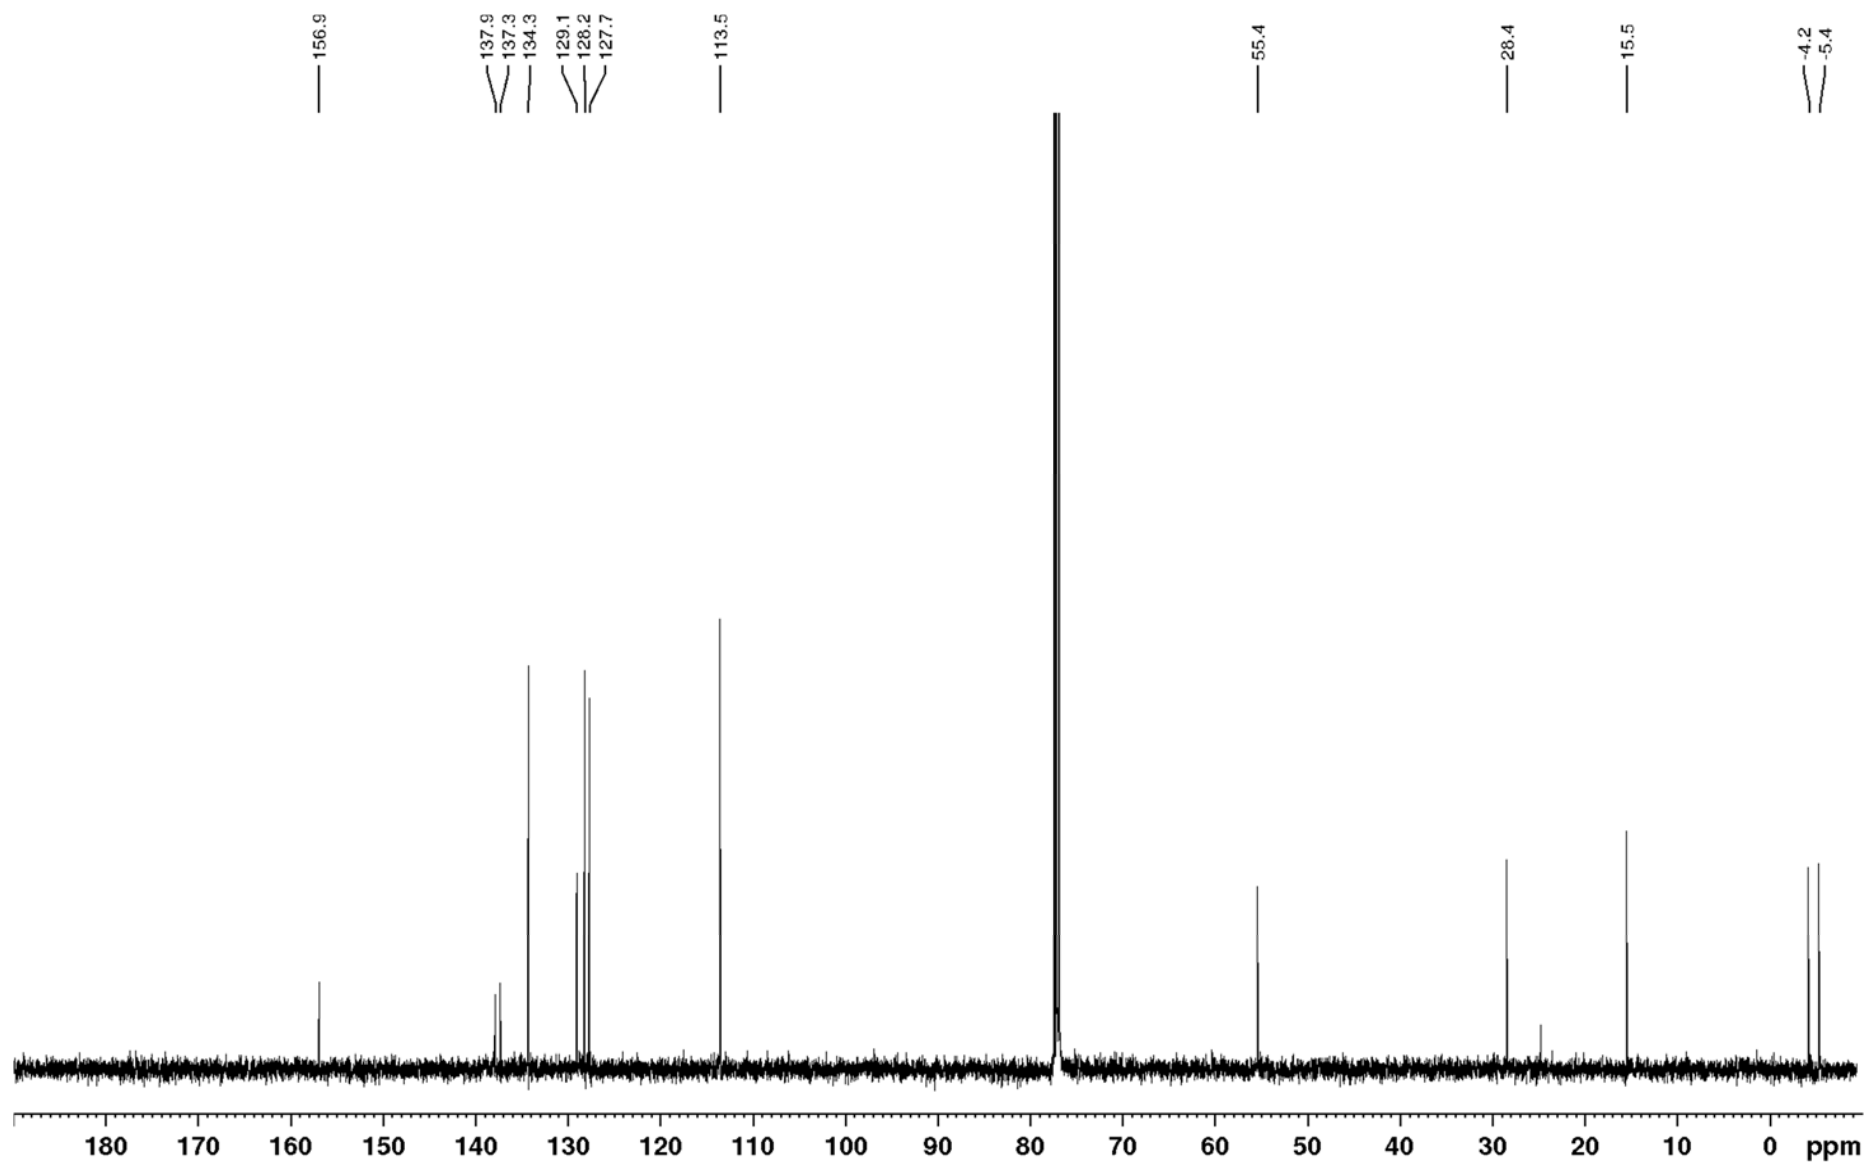

## SUPPORTING INFORMATION

 $^{29}\text{Si}\{^1\text{H}\}$  DEPT NMR (99 MHz,  $\text{CDCl}_3$ ):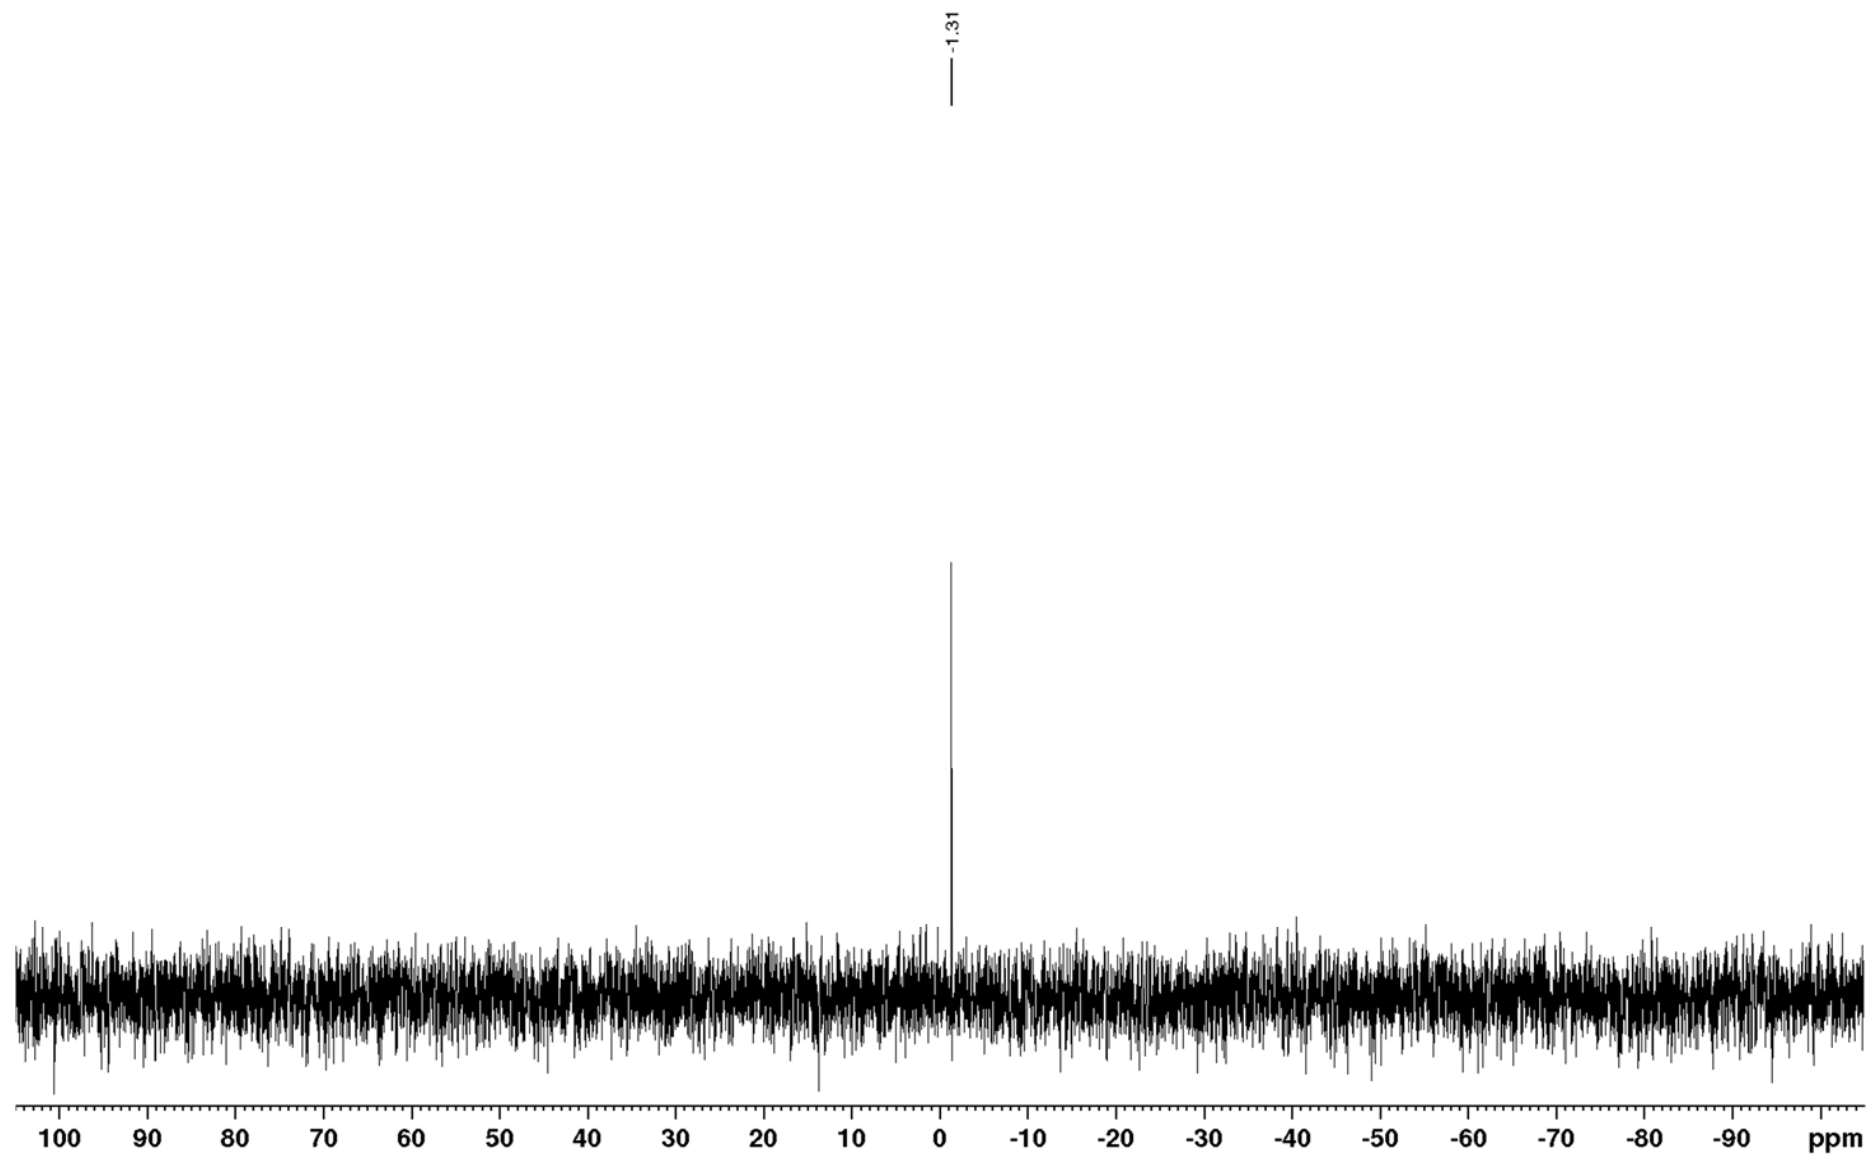

## SUPPORTING INFORMATION

**[1-(4-Fluorophenyl)ethyl]dimethyl(phenyl)silane (4ga)**<sup>1</sup>H NMR (500 MHz,CDCl<sub>3</sub>):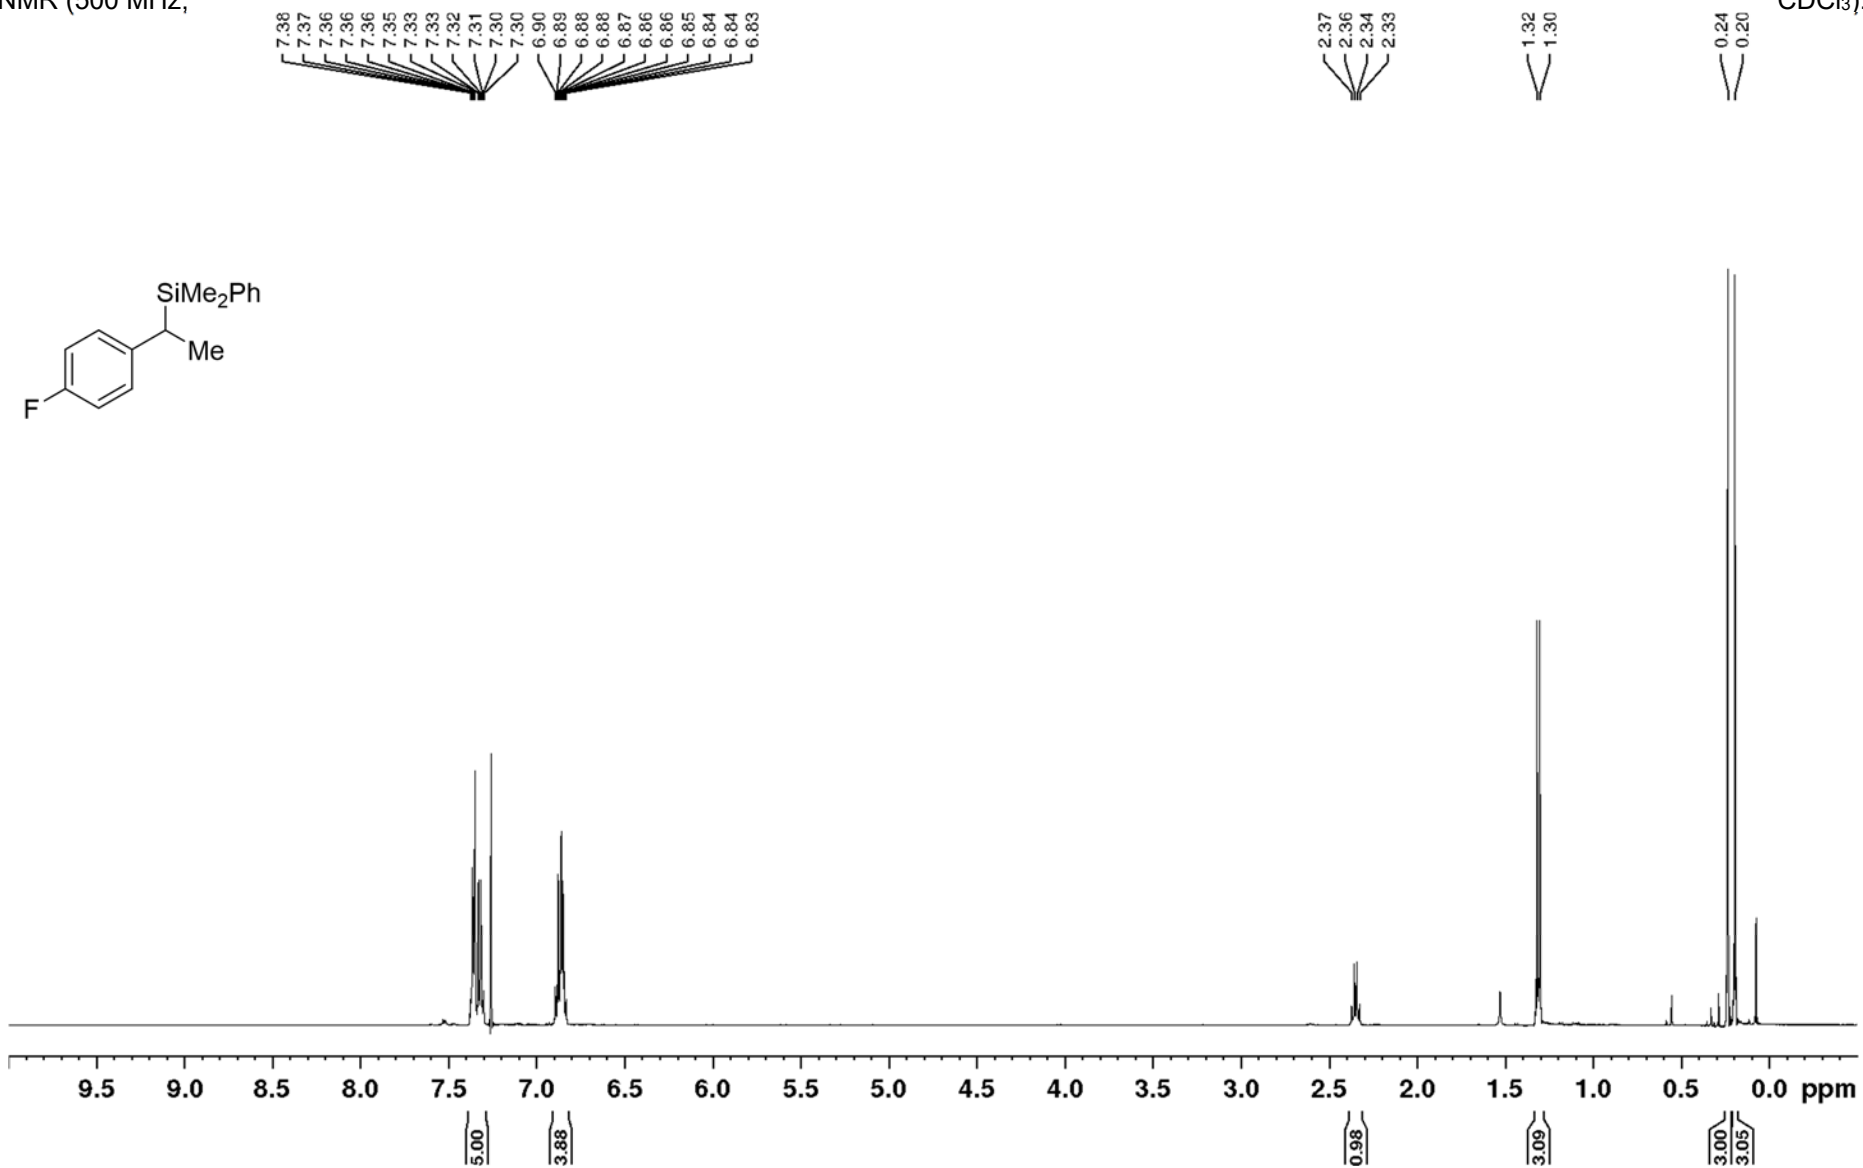

## SUPPORTING INFORMATION

 $^{13}\text{C}\{^1\text{H}\}$  NMR (126 MHz,  $\text{CDCl}_3$ ):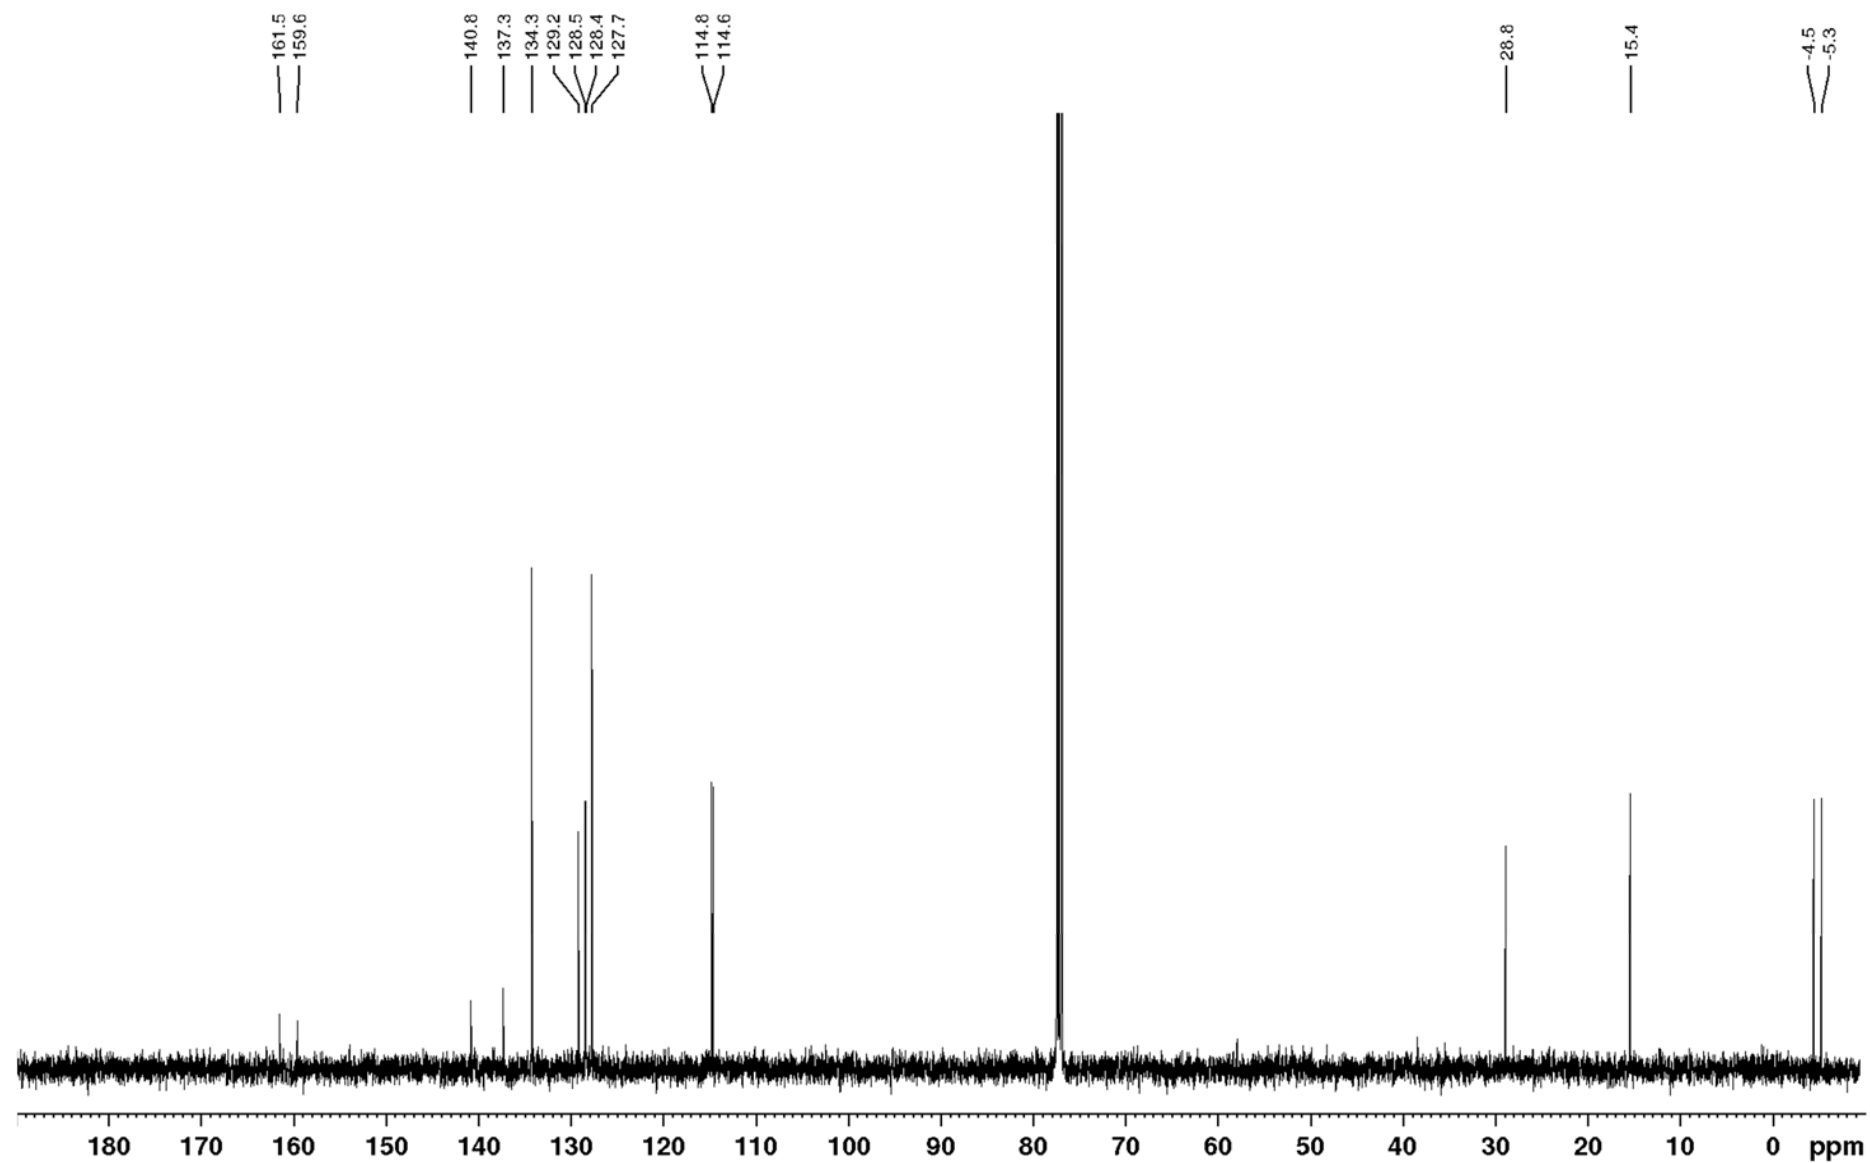

## SUPPORTING INFORMATION

$^{29}\text{Si}\{^1\text{H}\}$  DEPT NMR (99 MHz,  $\text{CDCl}_3$ ):

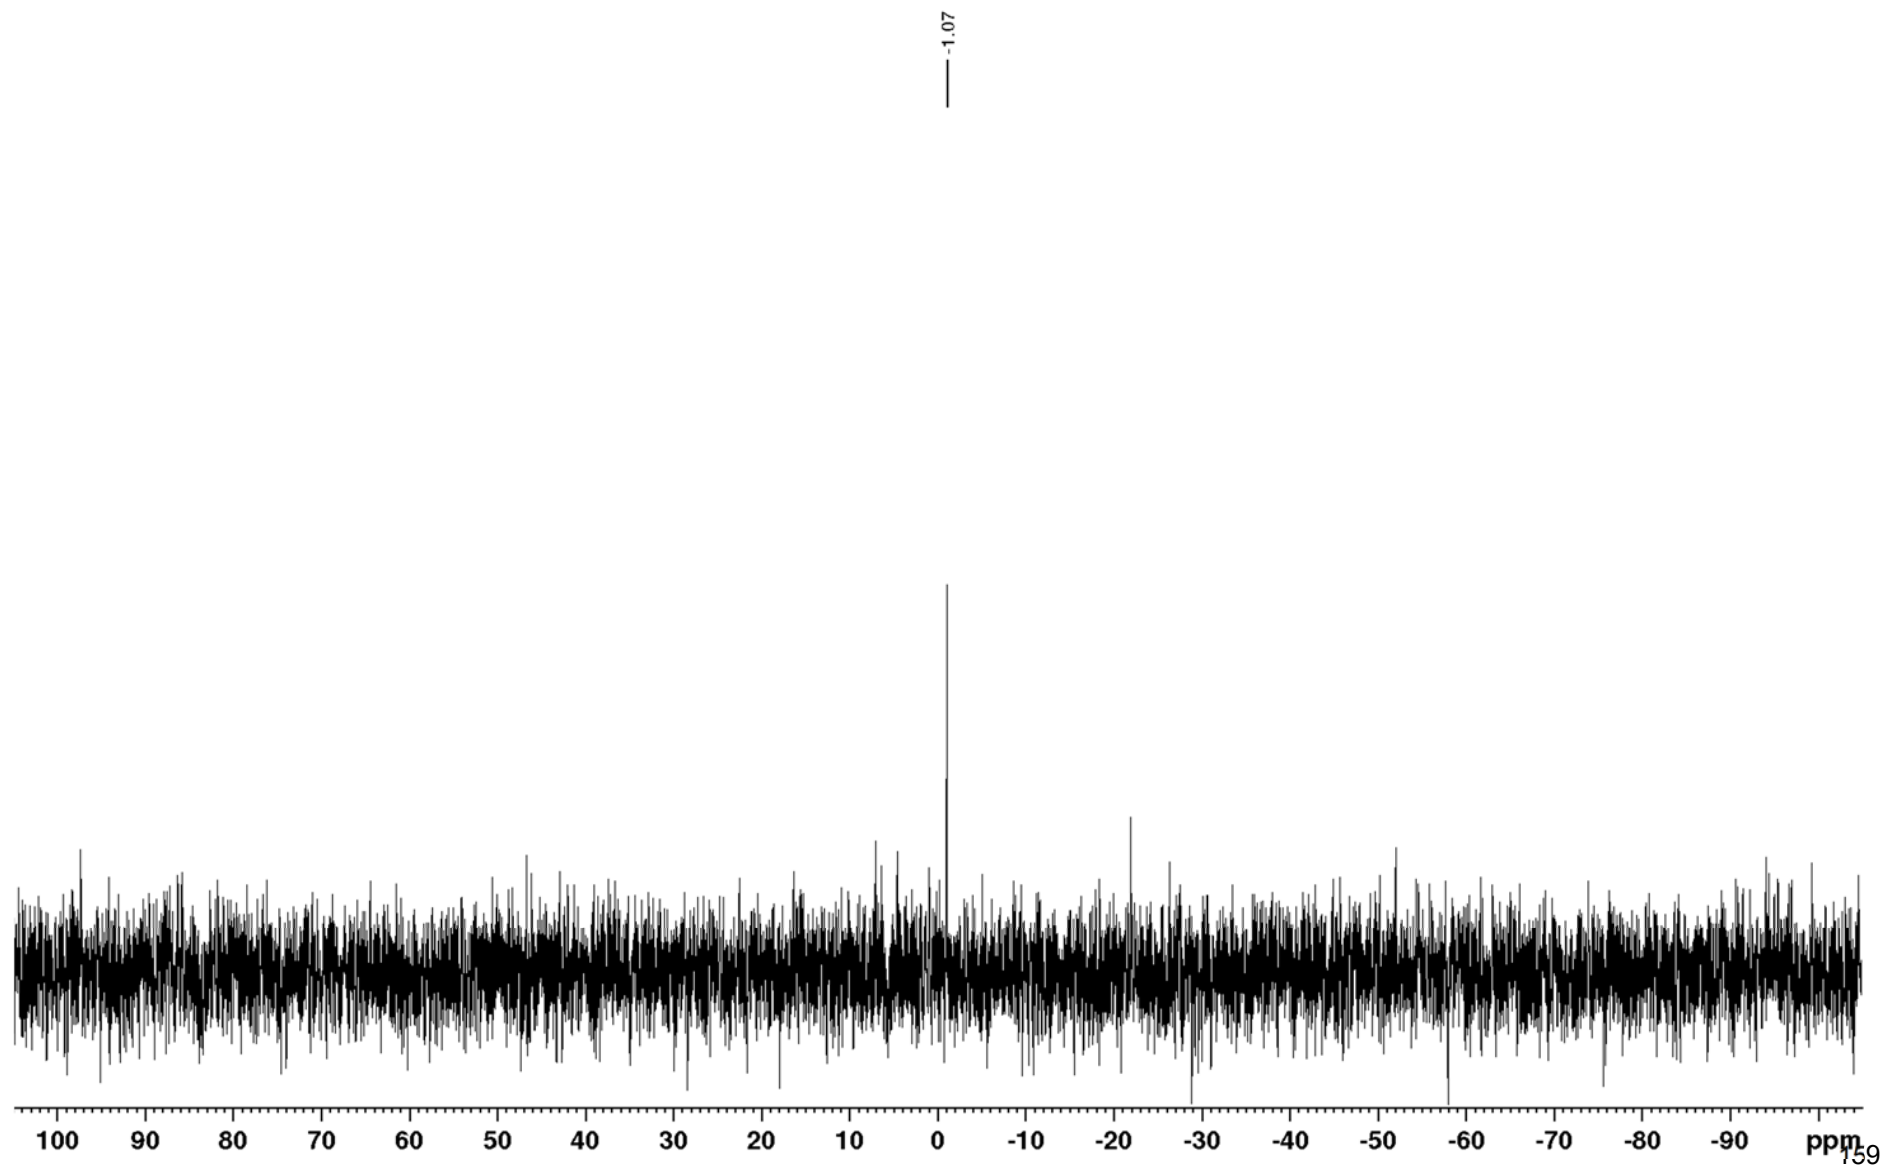

## SUPPORTING INFORMATION

**[1-(4-Chlorophenyl)ethyl]dimethyl(phenyl)silane (4ha)**<sup>1</sup>H NMR (500 MHz, CDCl<sub>3</sub>):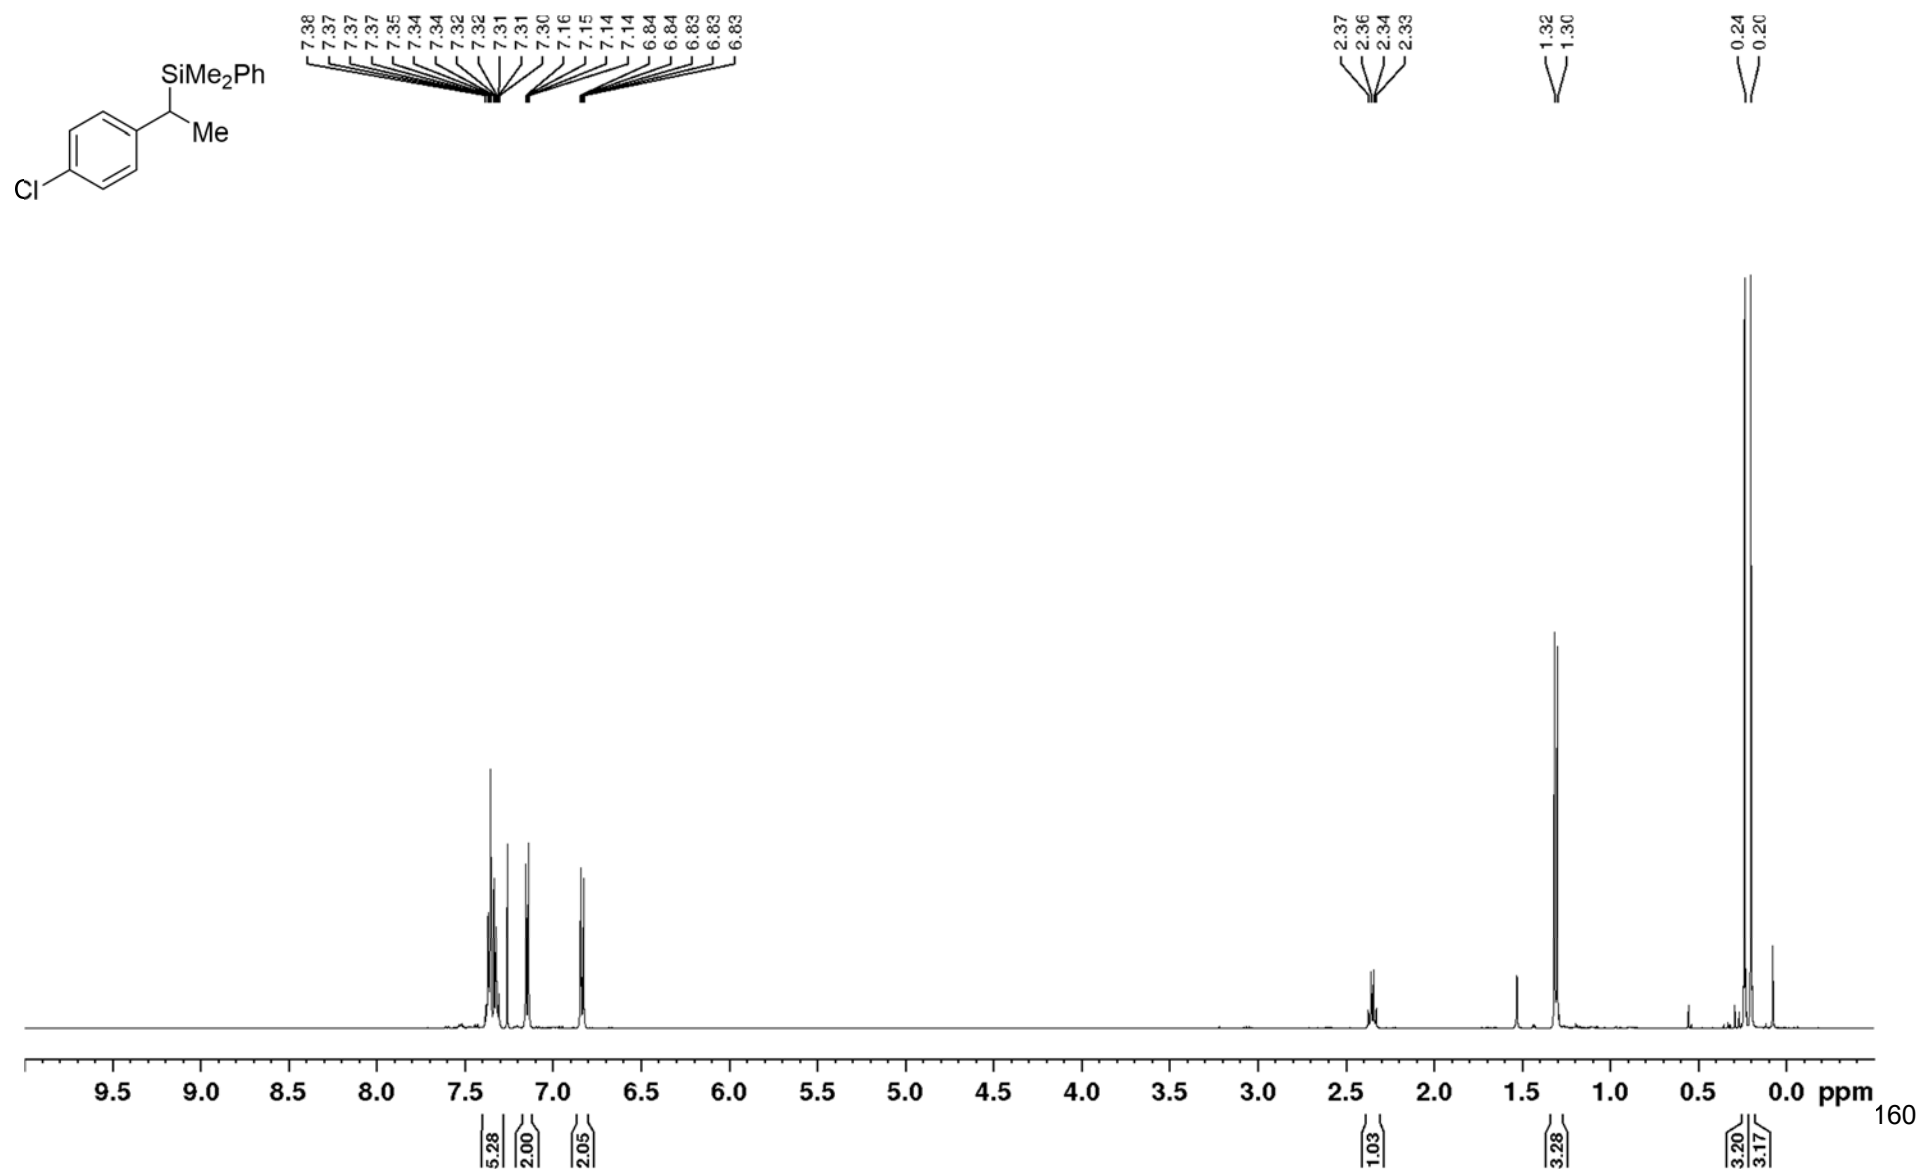



## SUPPORTING INFORMATION

 $^{13}\text{C}\{^1\text{H}\}$  NMR (126 MHz,  $\text{CDCl}_3$ ):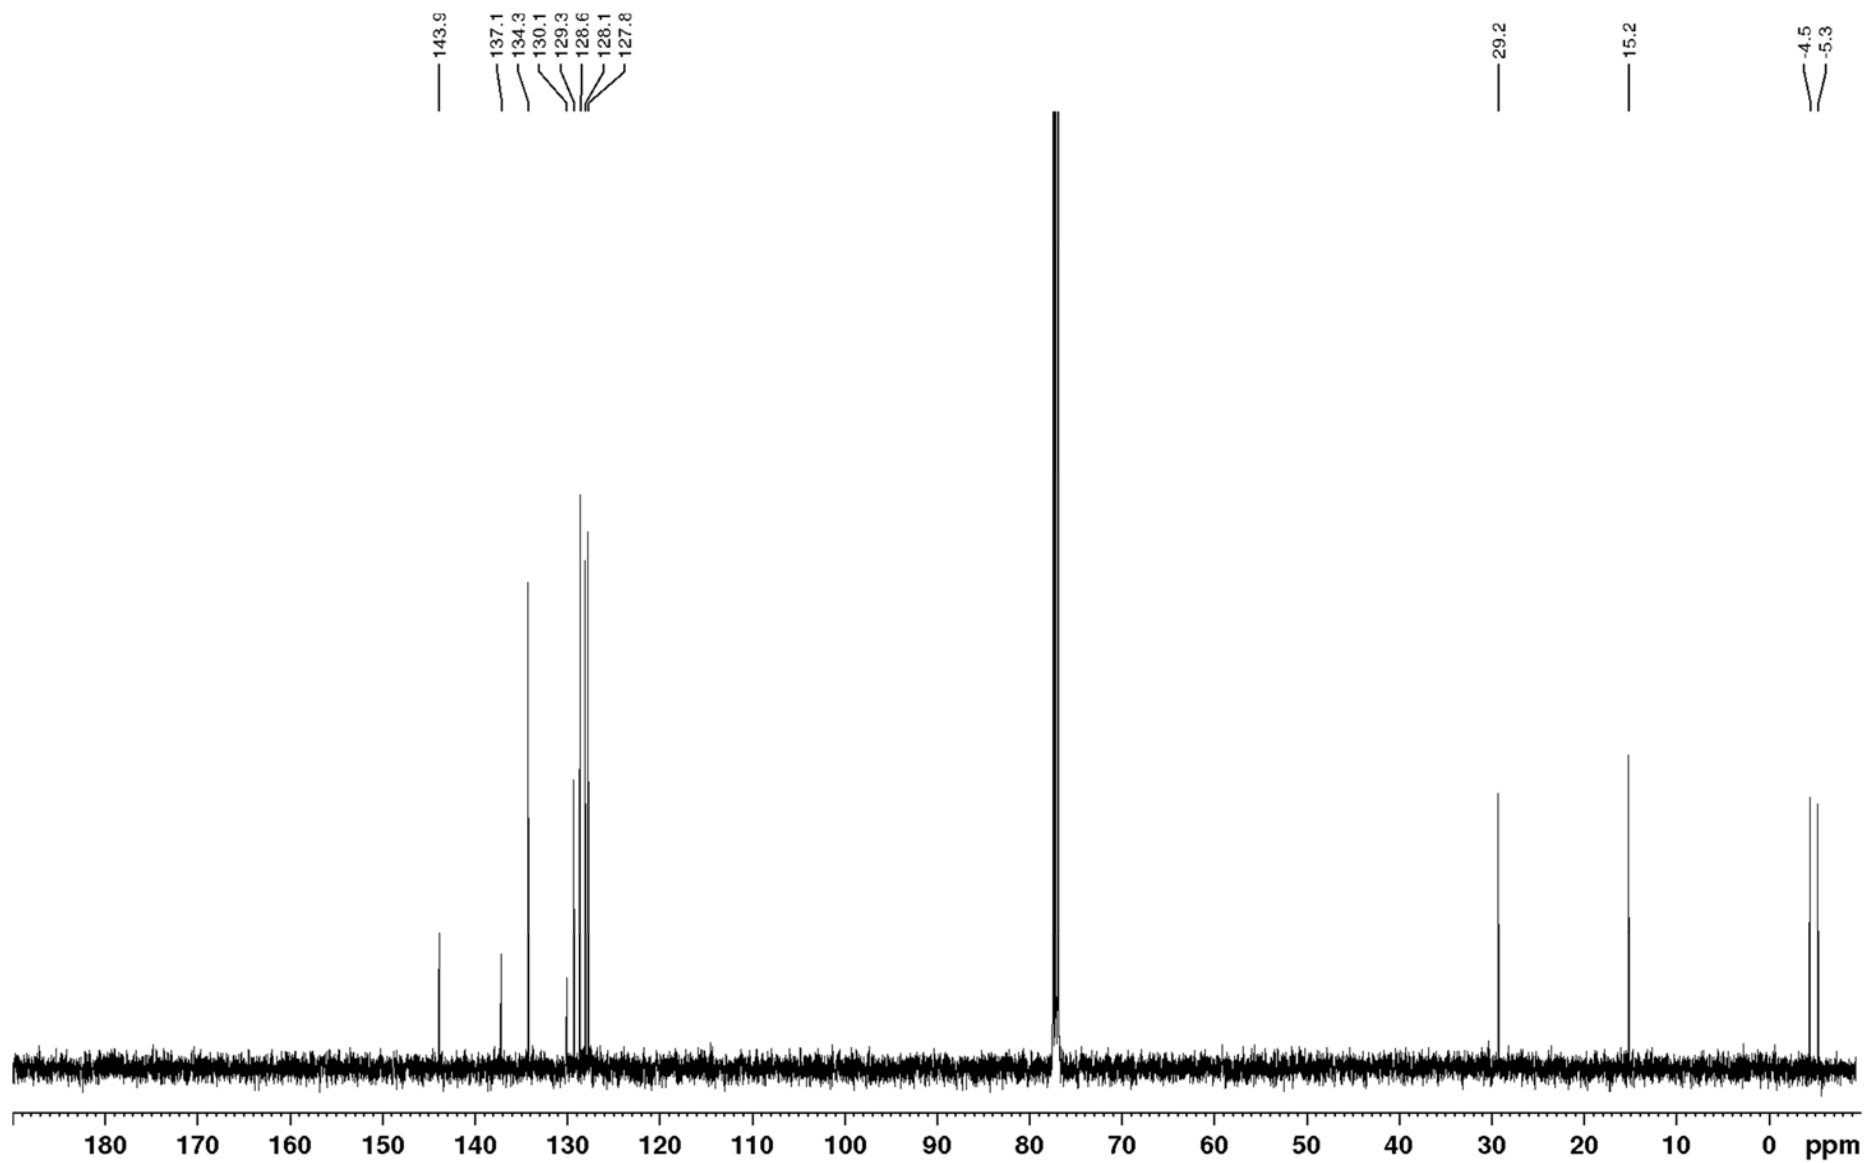

## SUPPORTING INFORMATION

 $^{29}\text{Si}\{^1\text{H}\}$  DEPT NMR (99 MHz,  $\text{CDCl}_3$ ):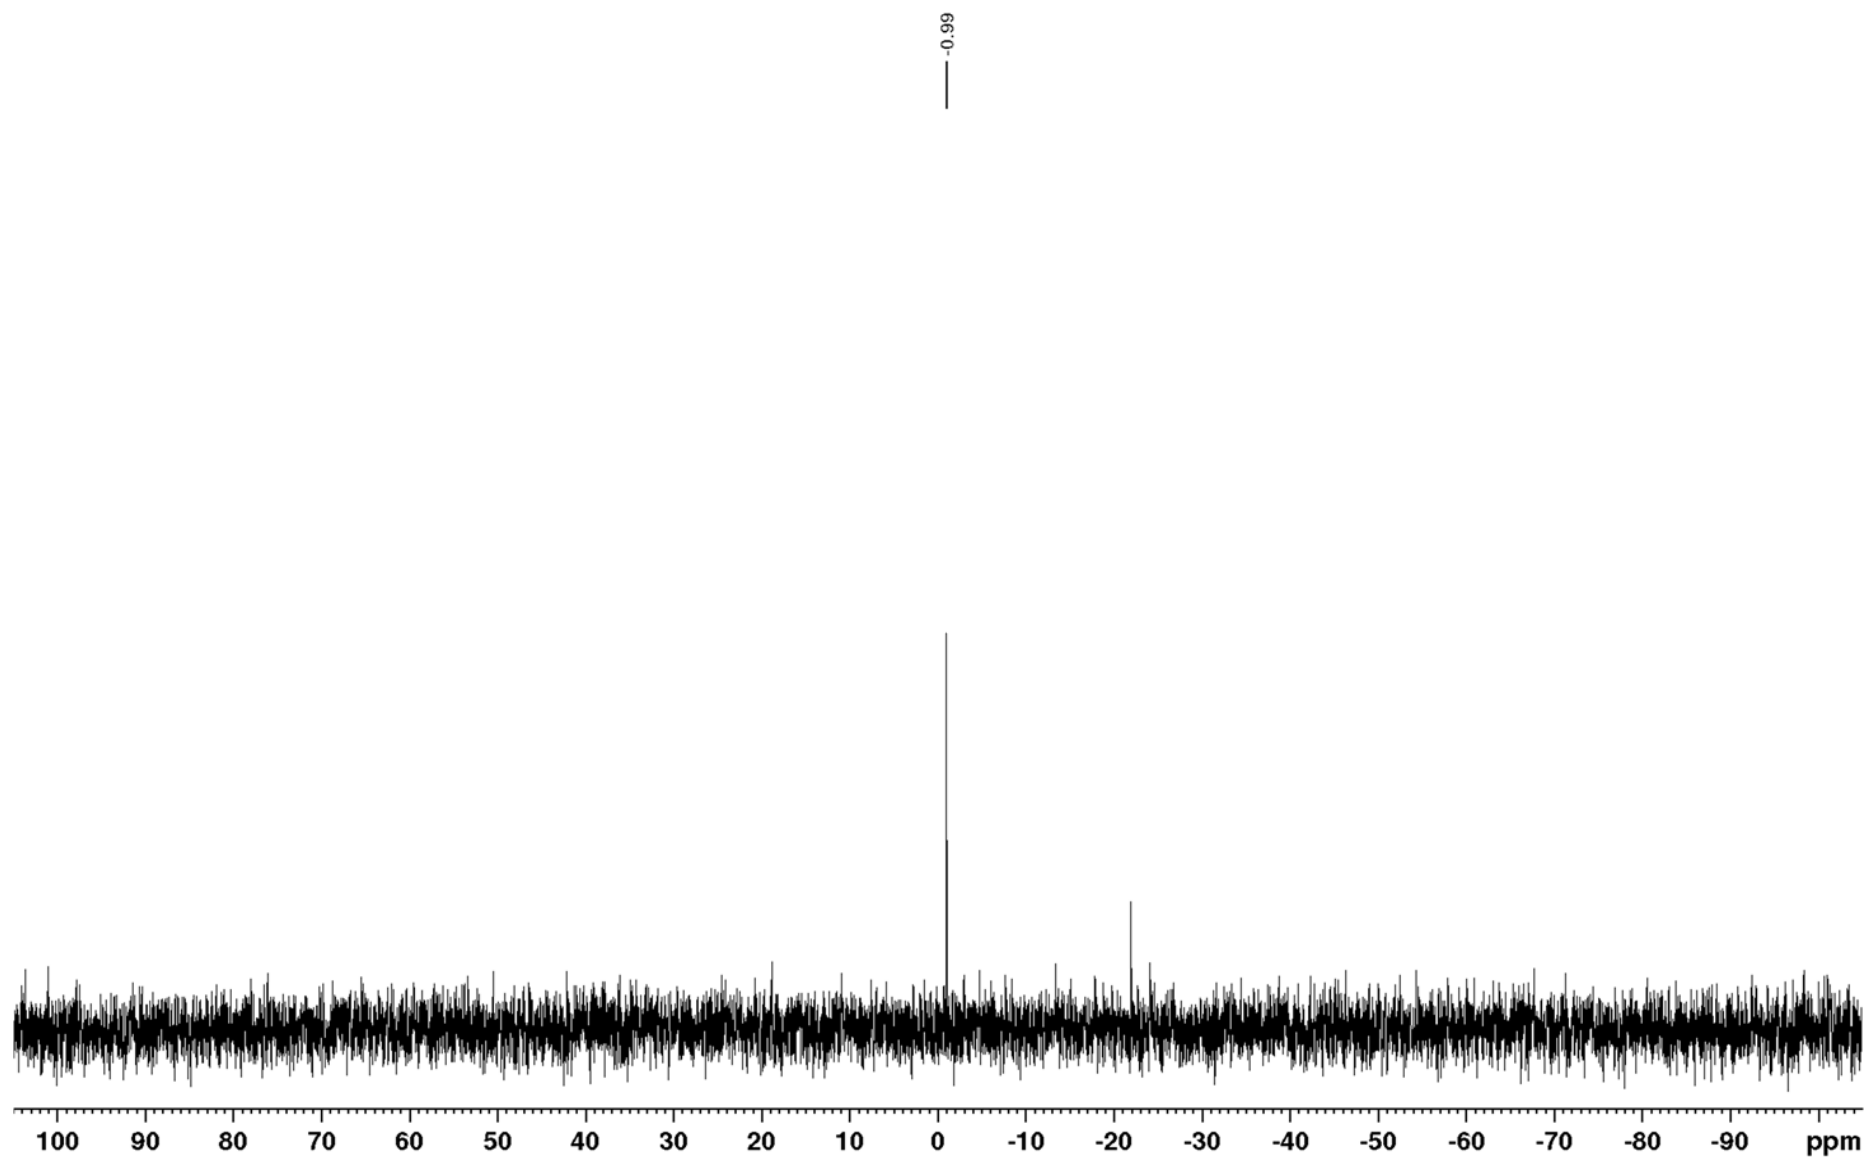

## SUPPORTING INFORMATION

## Dimethyl(phenyl){1-[4-(trifluoromethyl)phenyl]ethyl}silane (4ia)

 $^1\text{H}$  NMR (400 MHz,  $\text{CDCl}_3$ ):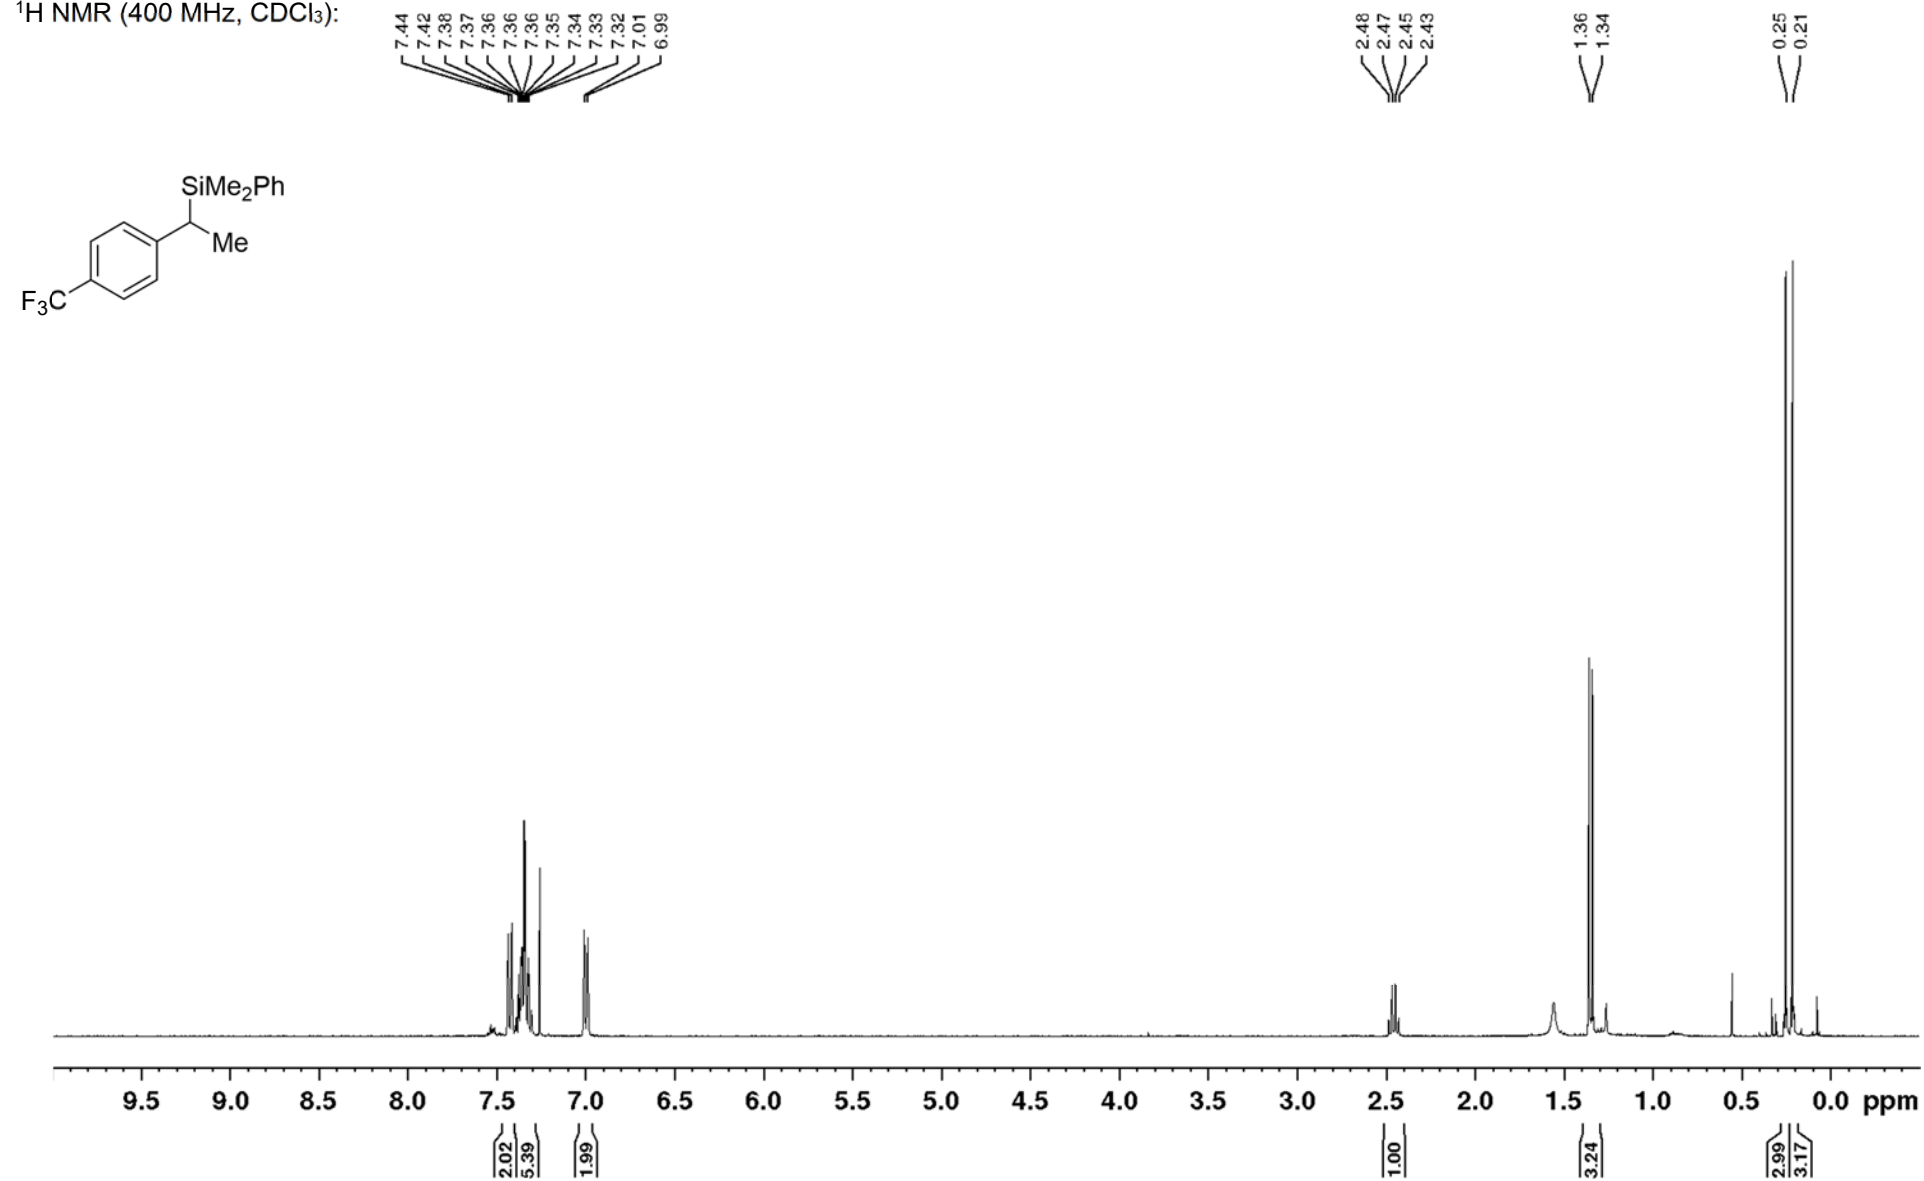

## SUPPORTING INFORMATION

 $^{13}\text{C}\{^1\text{H}\}$  NMR (101 MHz,  $\text{CDCl}_3$ ):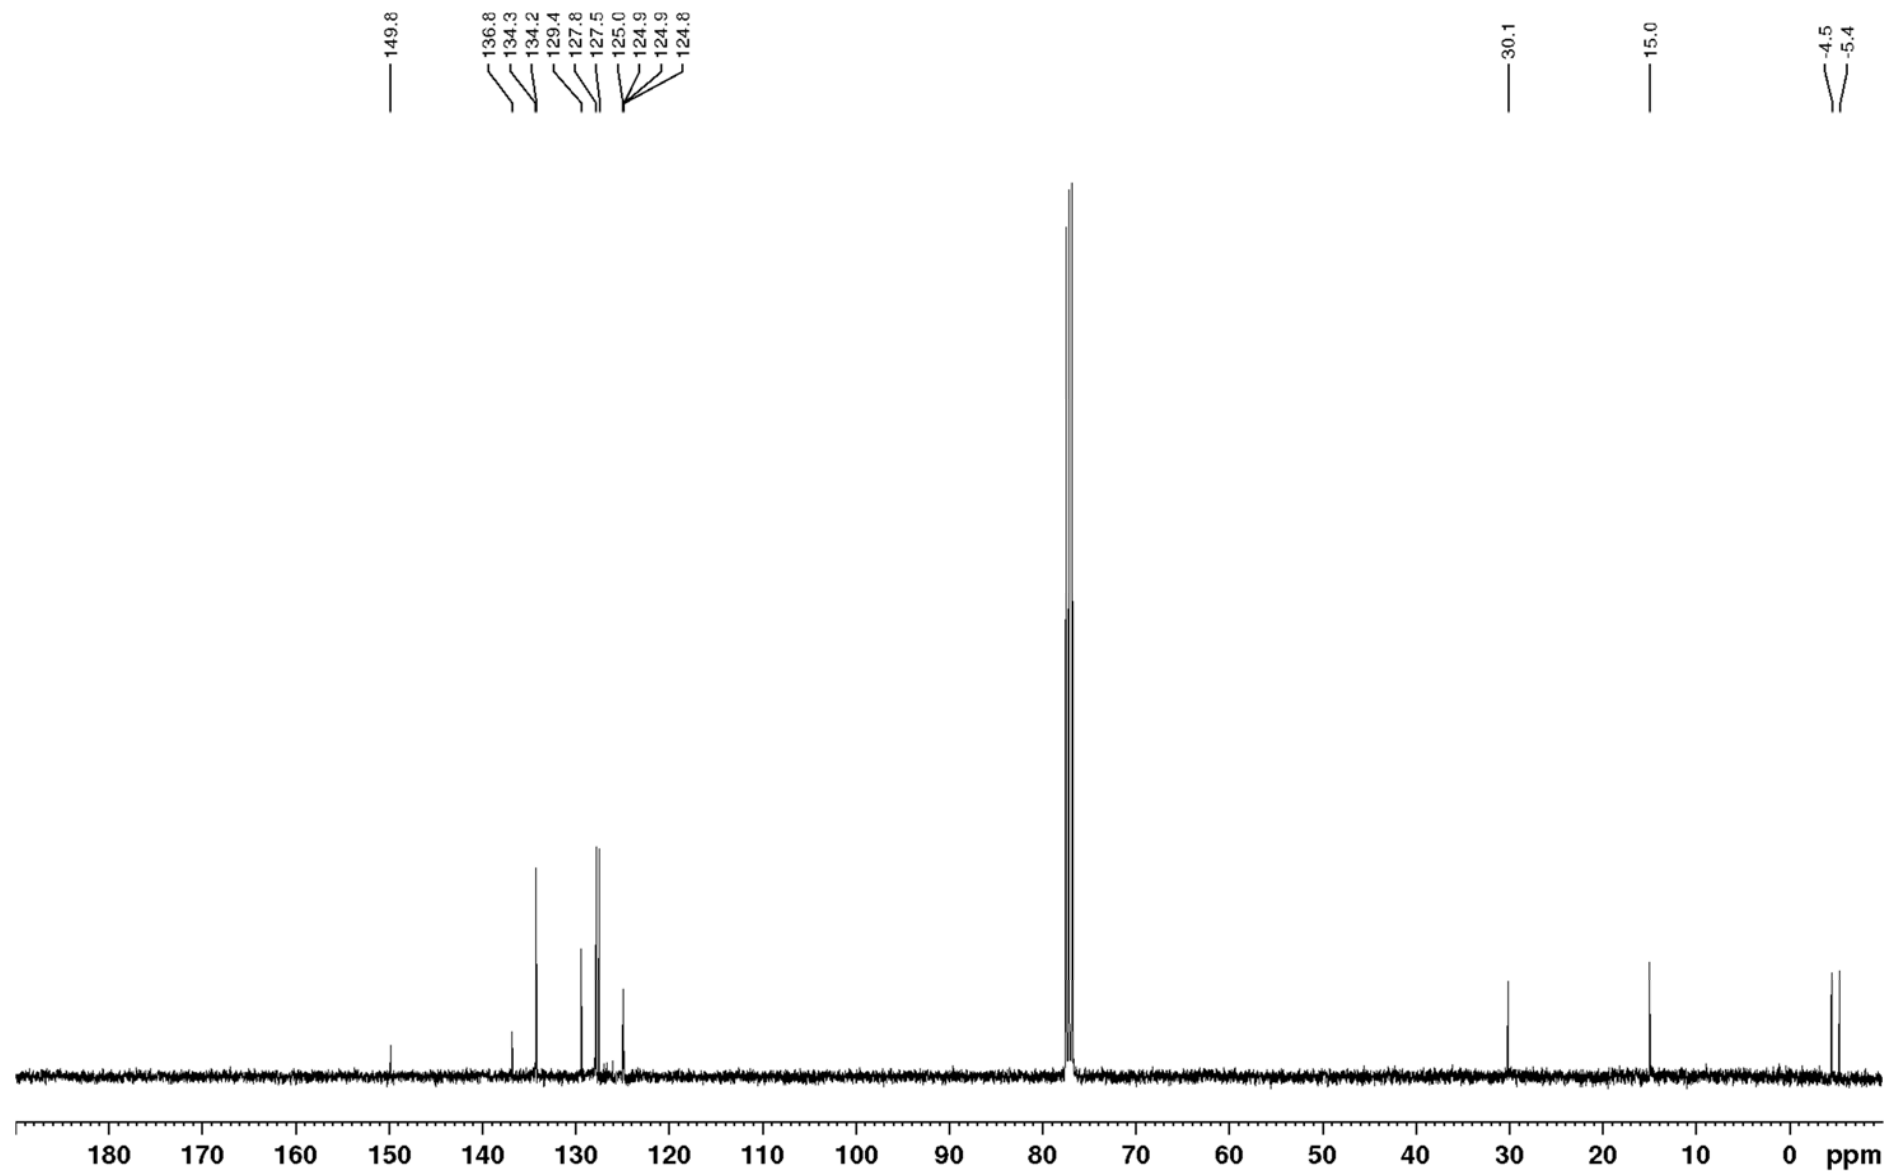

## SUPPORTING INFORMATION

 $^{13}\text{C}\{^{19}\text{F}\}$  DEPT NMR (126 MHz,  $\text{DMSO-}d_6$ ):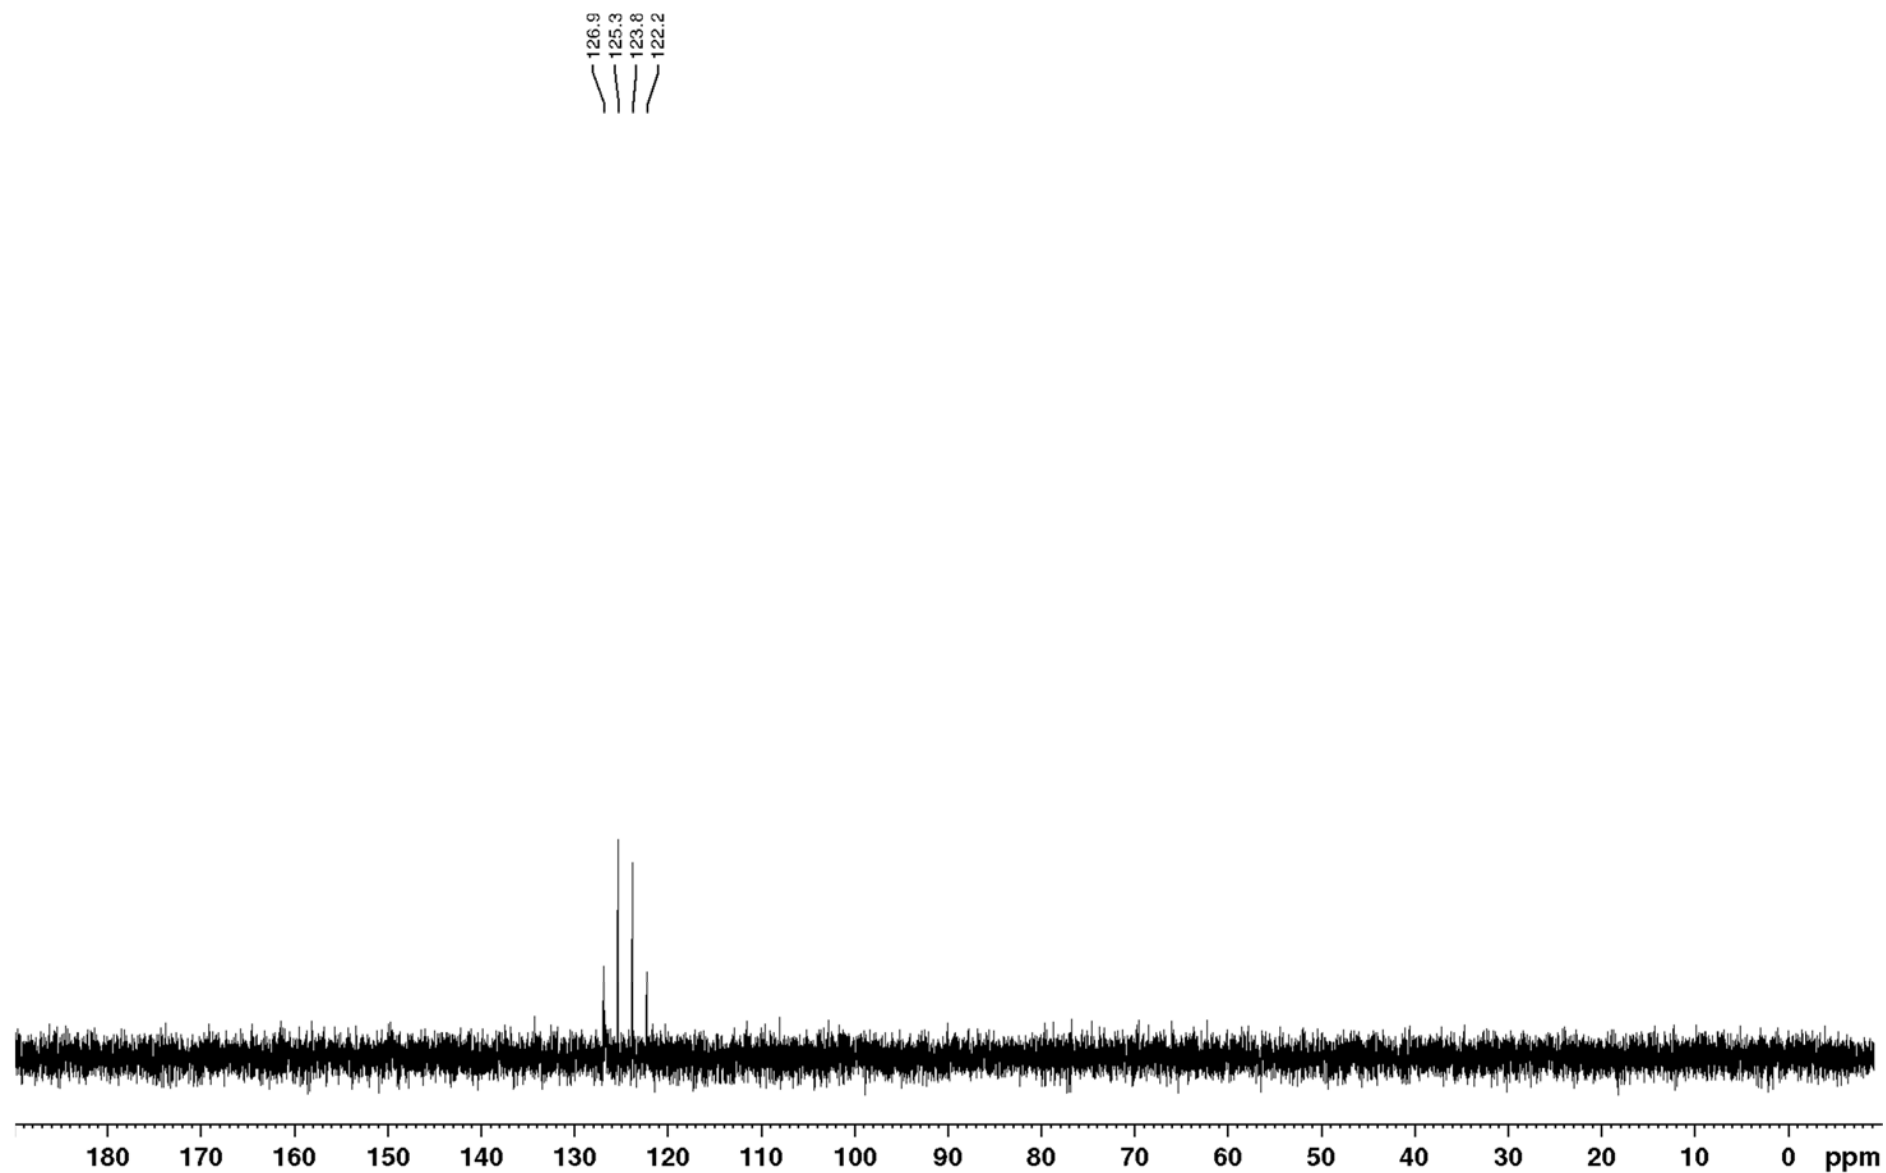

## SUPPORTING INFORMATION

 $^{29}\text{Si}\{^1\text{H}\}$  DEPT NMR (99 MHz,  $\text{CDCl}_3$ ):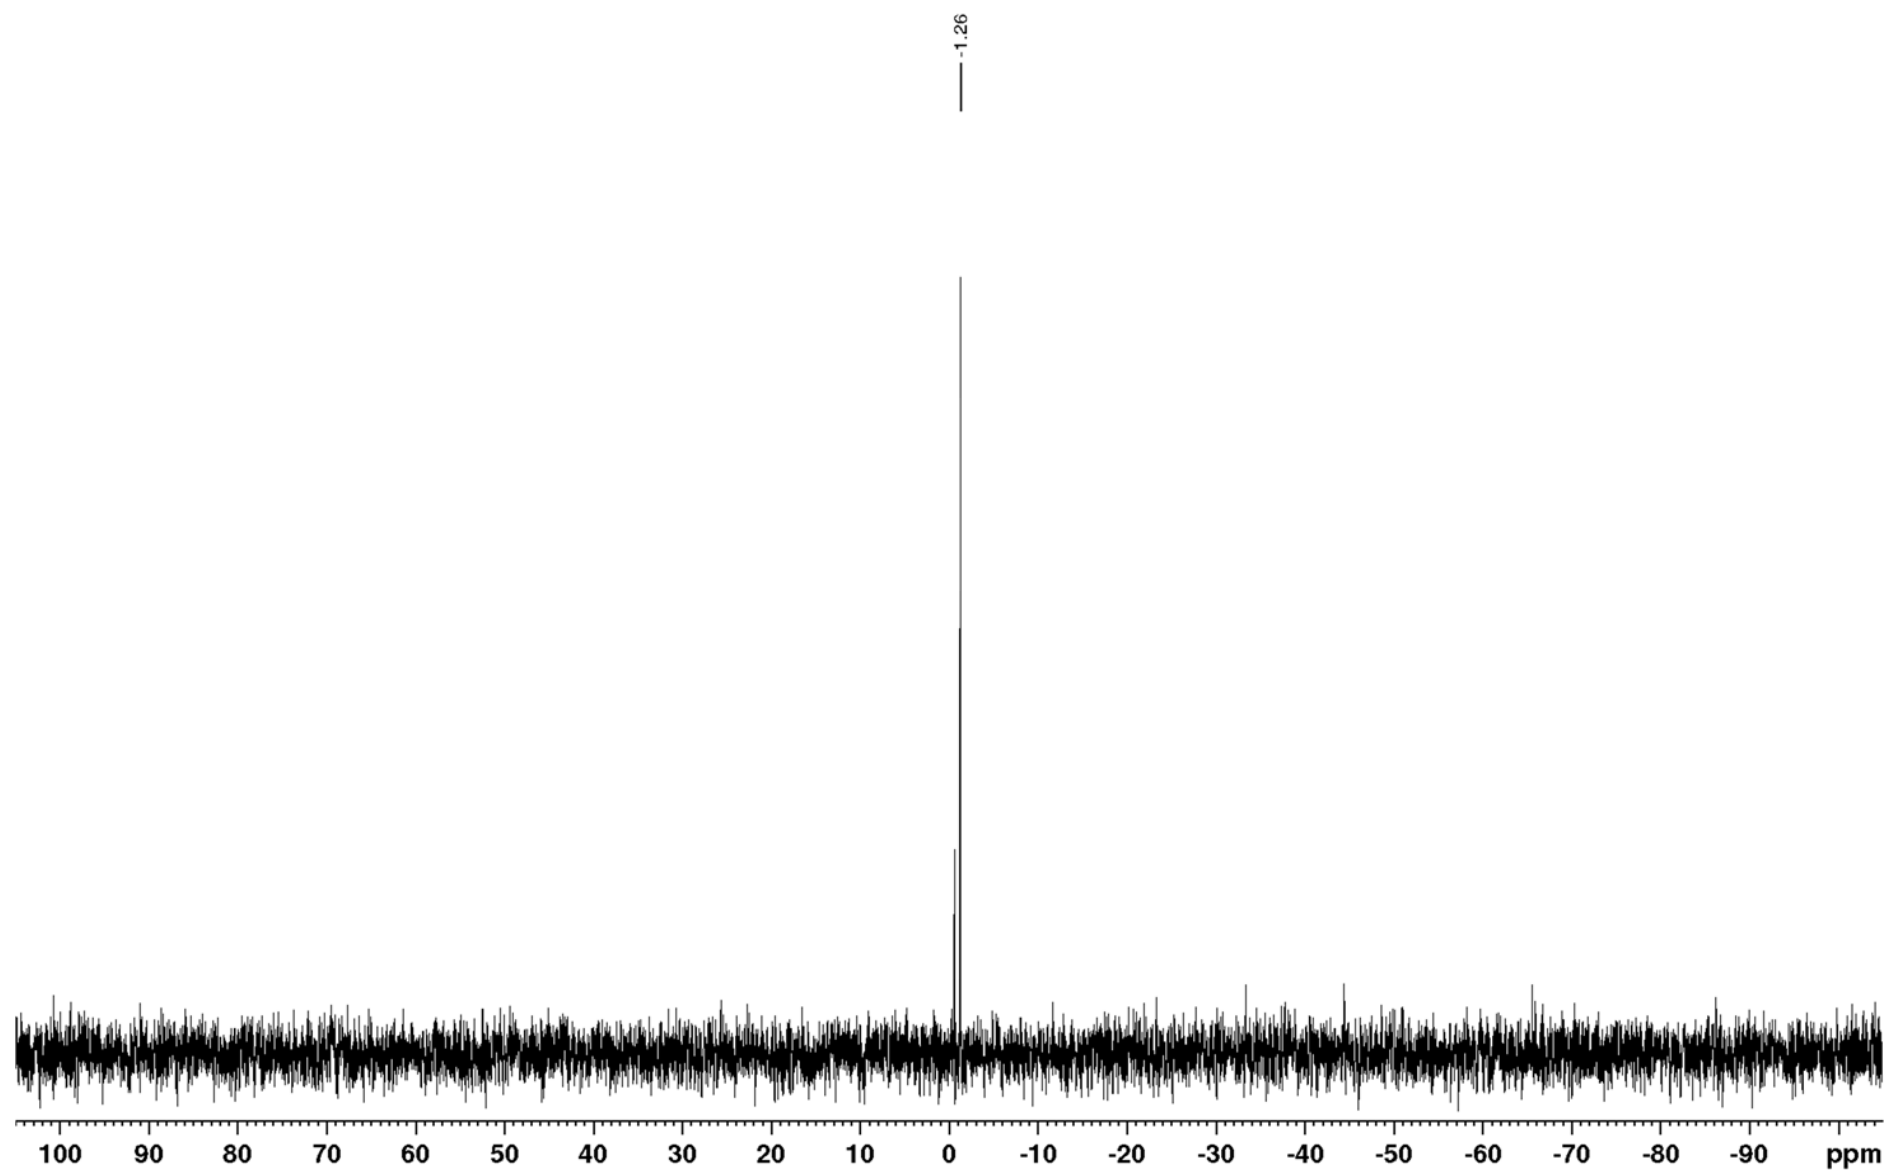

## SUPPORTING INFORMATION

## 4-{1-[Dimethyl(phenyl)silyl]ethyl}benzonitrile (4ja)

 $^1\text{H}$  NMR $\text{CDCl}_3$ :

7.46  
7.46  
7.45  
7.44  
7.44  
7.44  
7.40  
7.39  
7.39  
7.38  
7.38  
7.37  
7.37  
7.37  
7.36  
7.36  
7.35  
7.34  
7.34  
7.33  
7.32  
7.32  
7.32  
7.31  
7.30  
6.97  
6.97  
6.96  
6.96  
6.95  
6.95  
6.94

2.48  
2.47  
2.45  
2.44

1.35  
1.34

0.26  
0.22

(500 MHz,

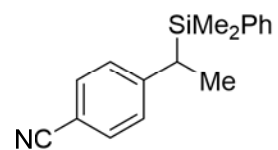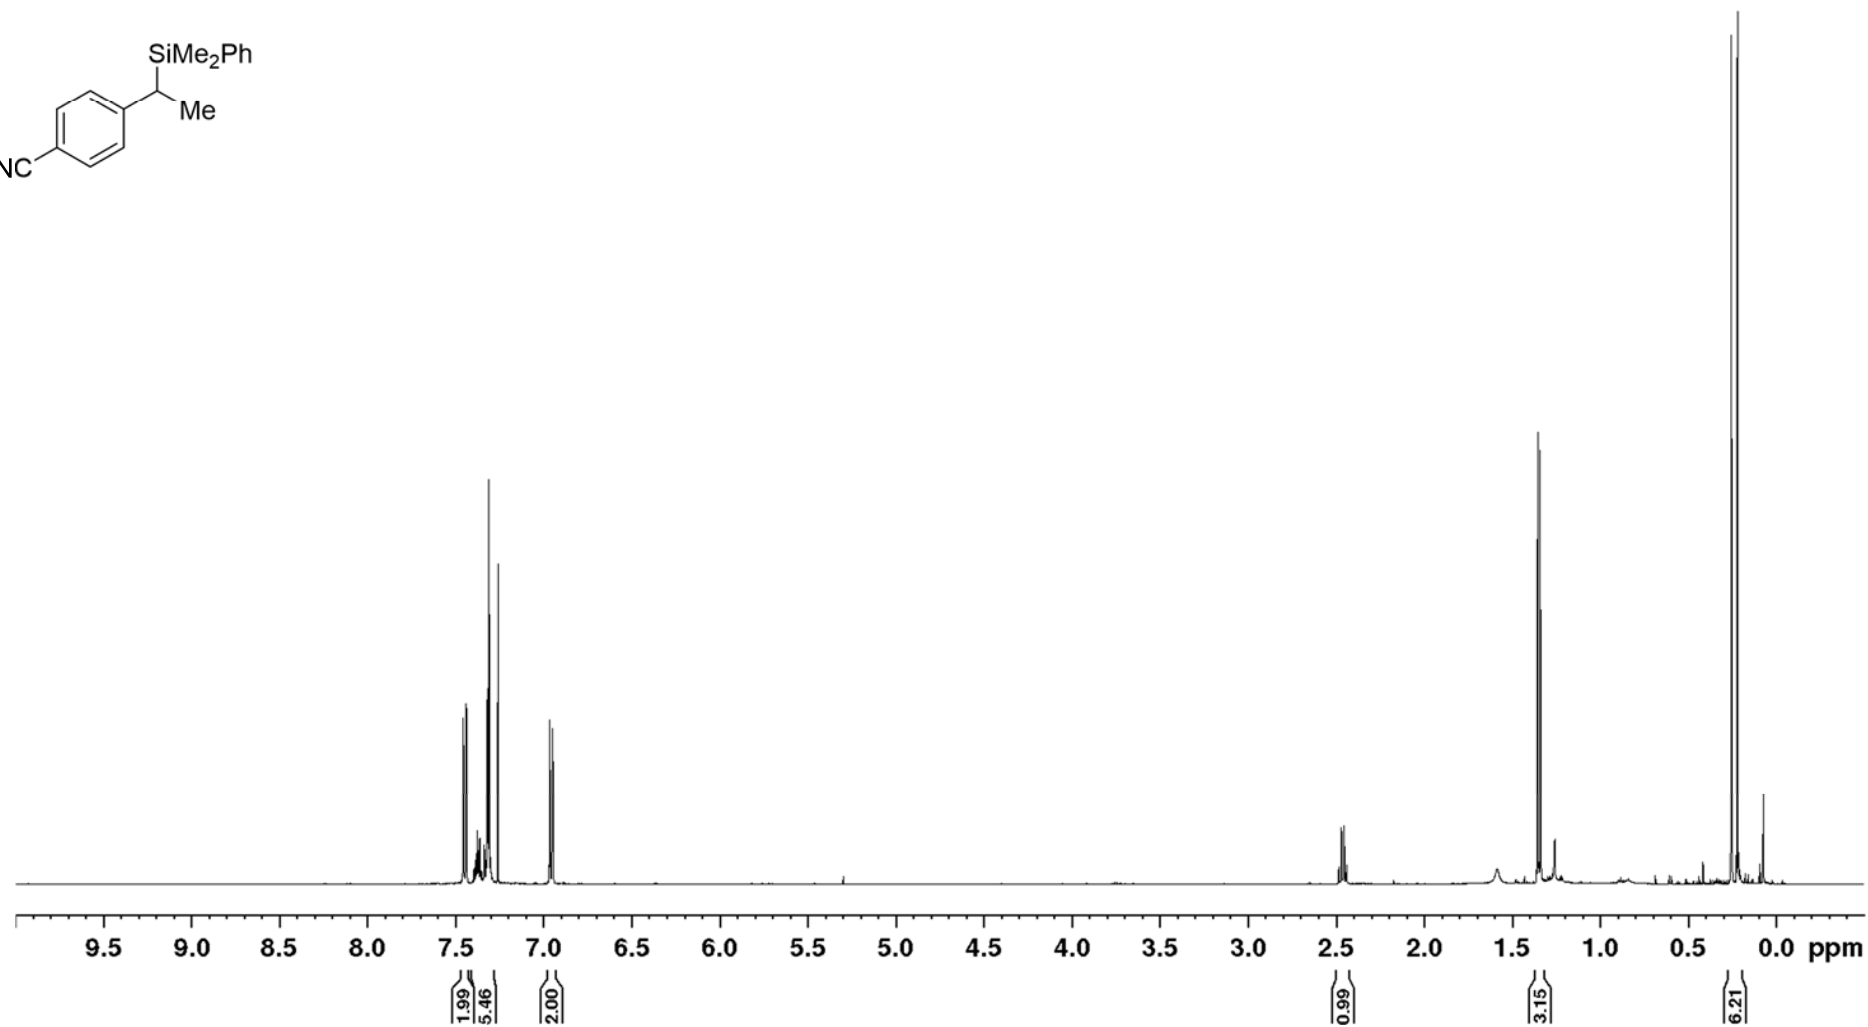

## SUPPORTING INFORMATION

 $^{13}\text{C}\{^1\text{H}\}$  NMR (126 MHz,  $\text{CDCl}_3$ ):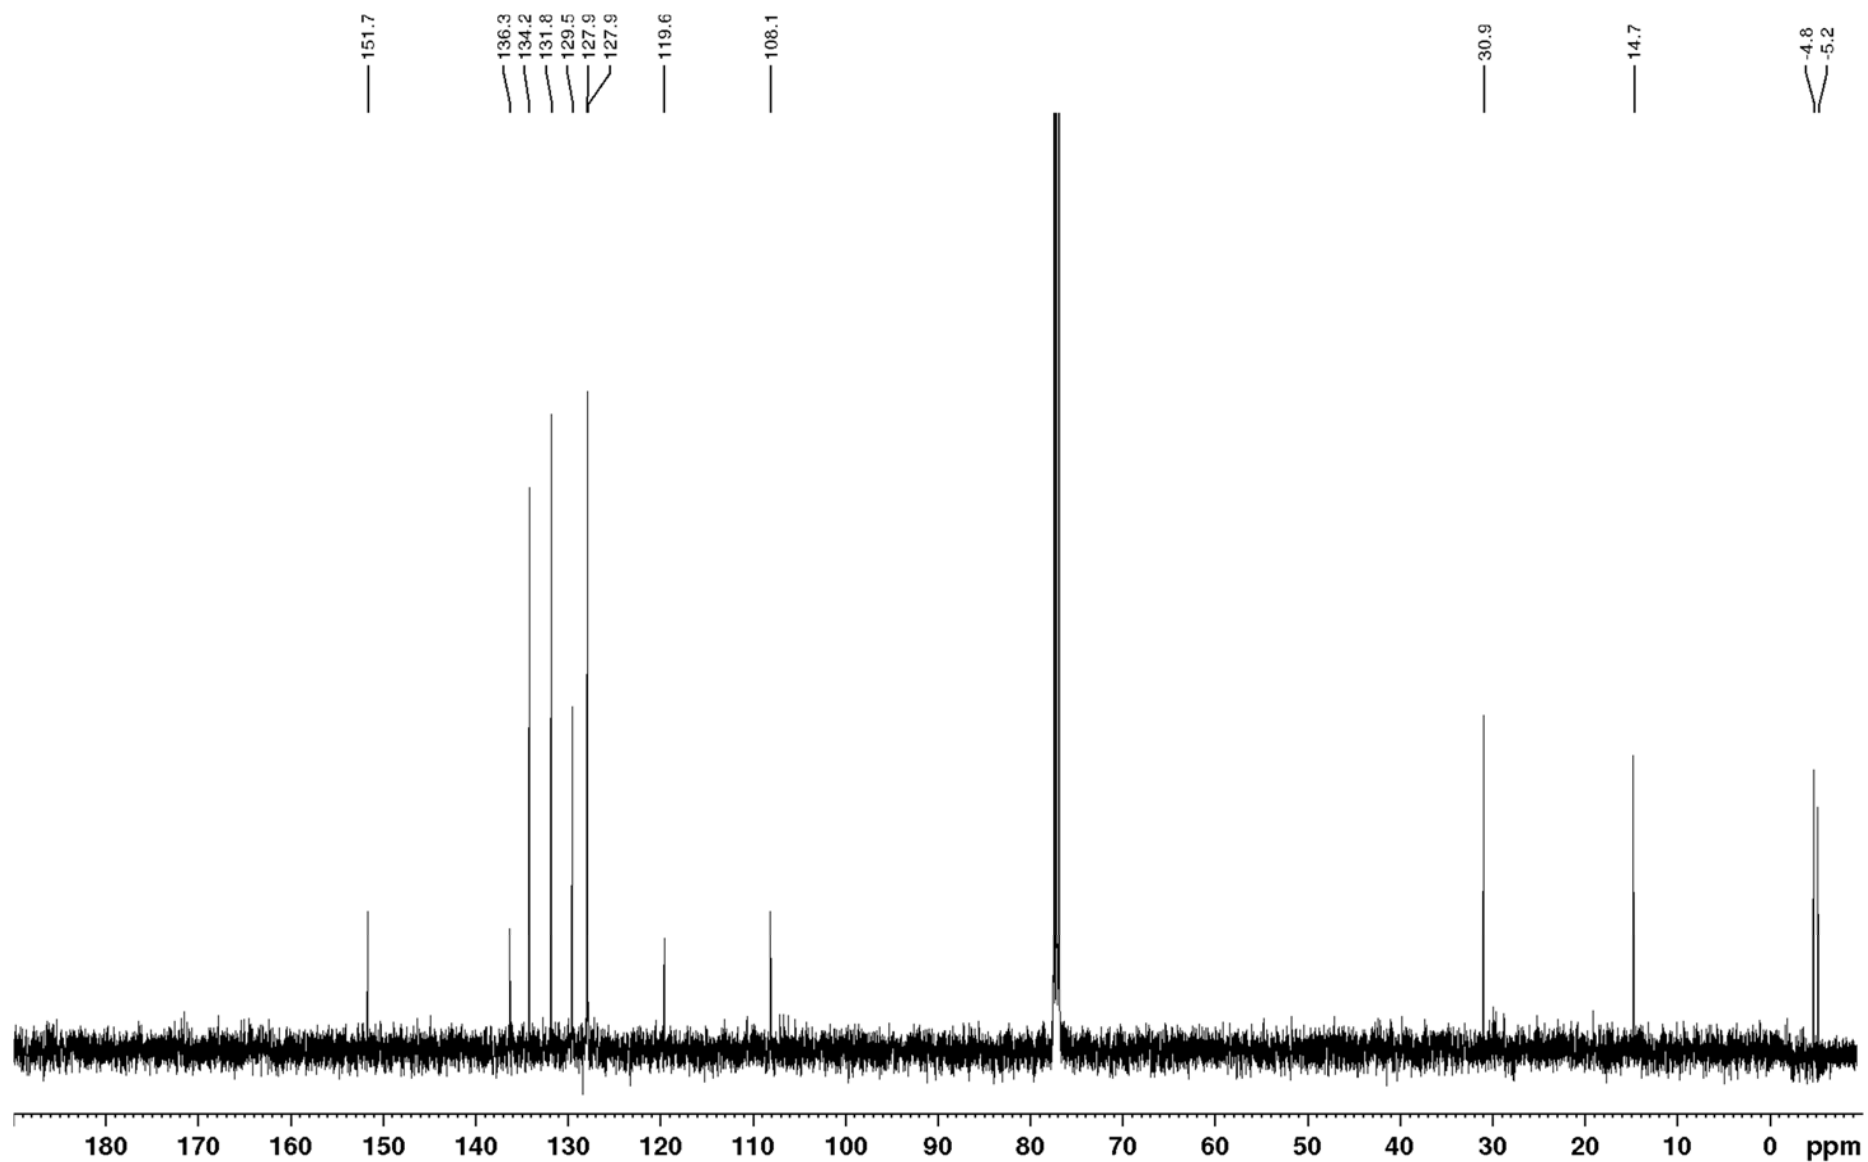



## SUPPORTING INFORMATION

 $^{29}\text{Si}\{^1\text{H}\}$  DEPT NMR (99 MHz,  $\text{CDCl}_3$ ):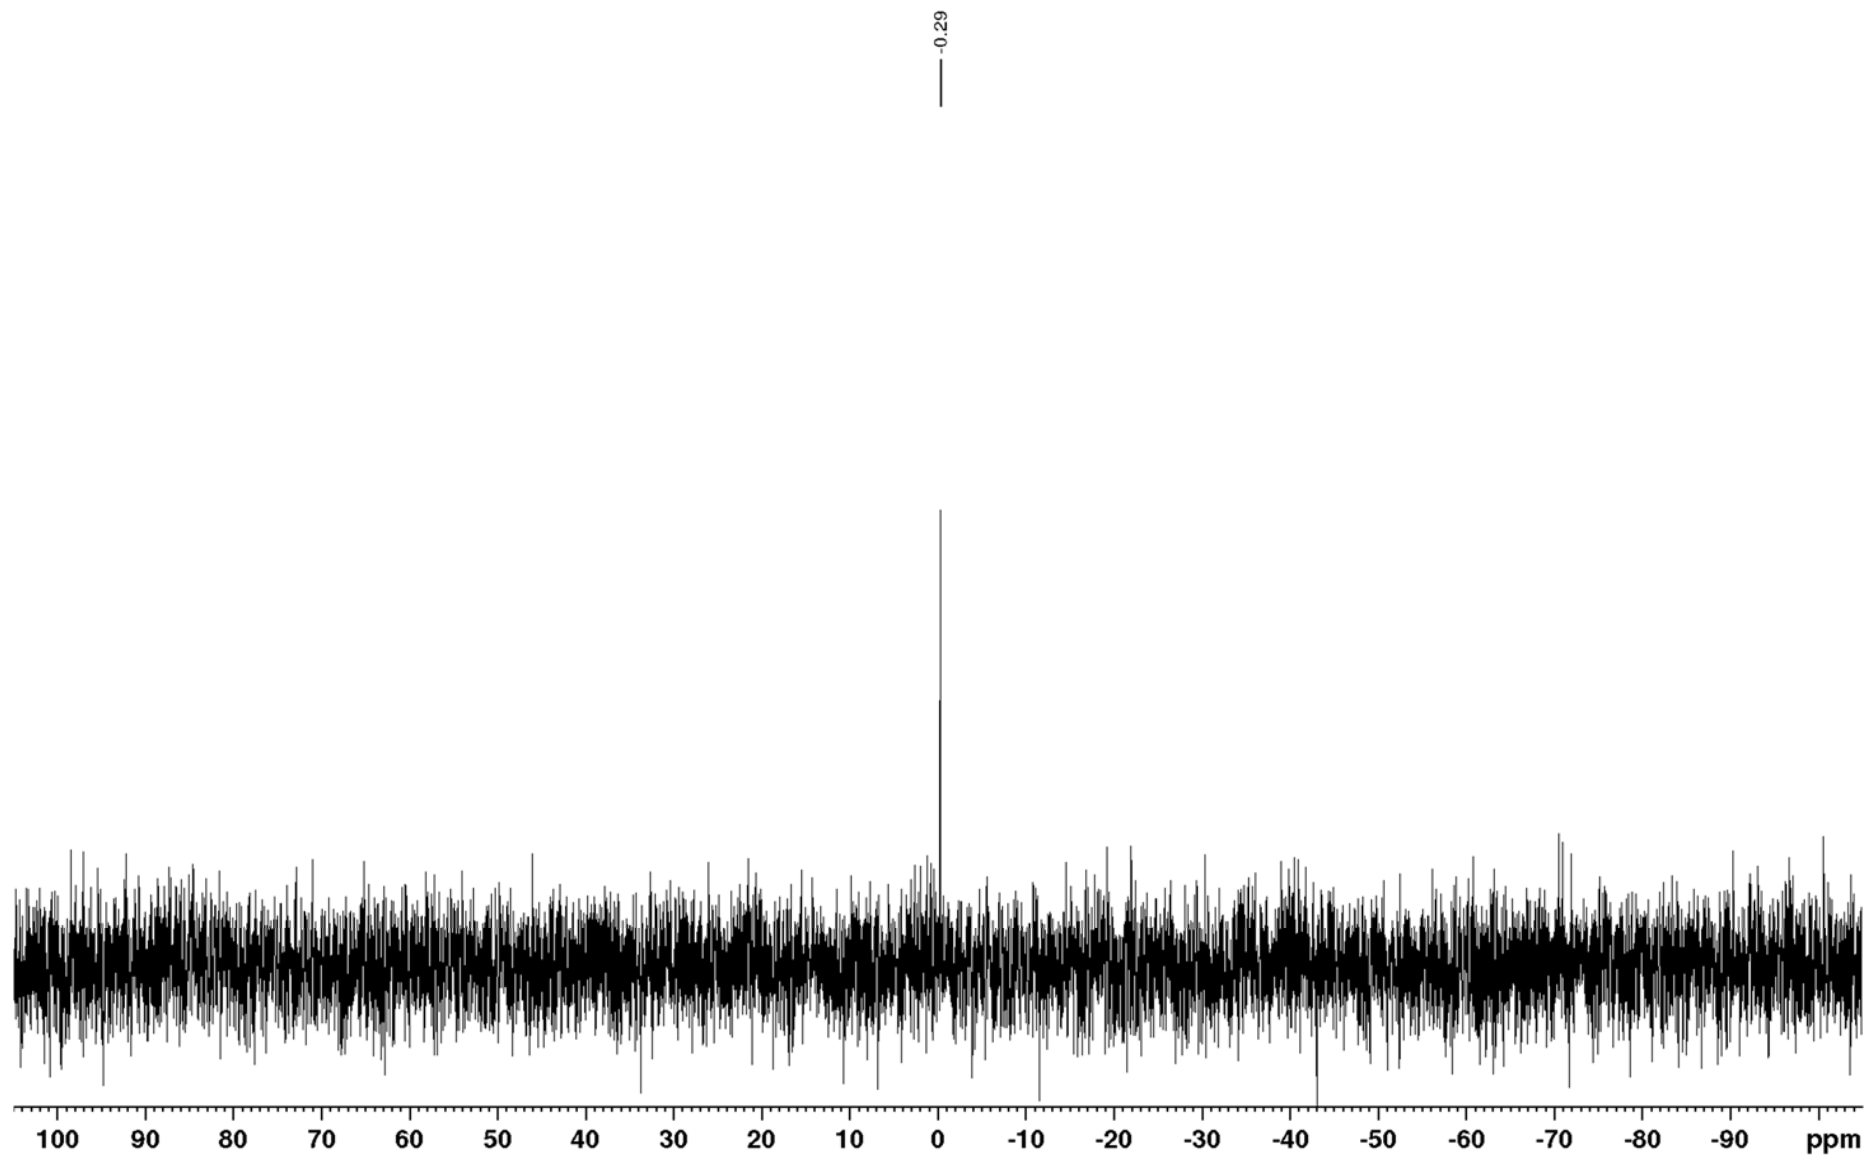

## SUPPORTING INFORMATION

## Methyl 4-{1-[dimethyl(phenyl)silyl]ethyl}benzoate (4ka)

 $^1\text{H}$  NMR (500 MHz,  $\text{CDCl}_3$ ):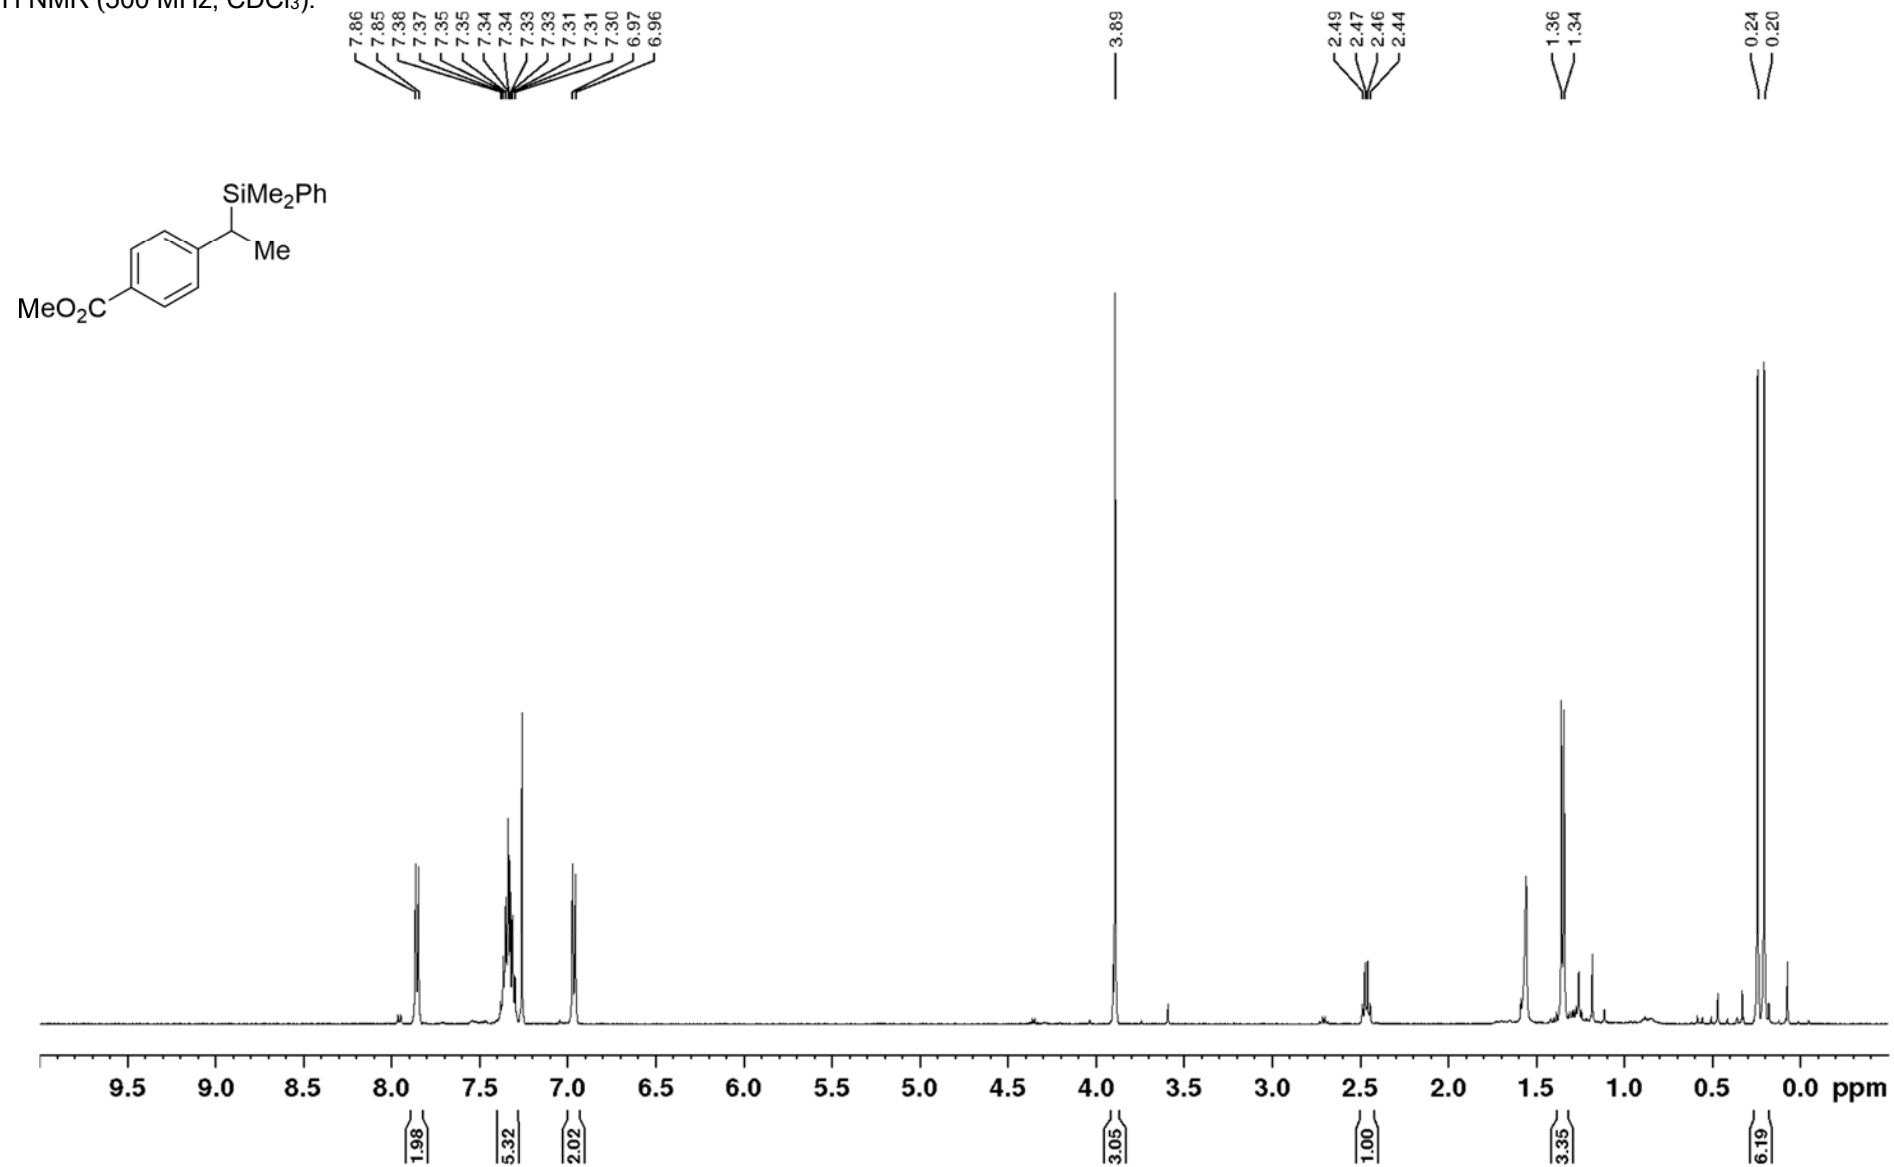

## SUPPORTING INFORMATION

 $^{13}\text{C}\{^1\text{H}\}$  NMR (126 MHz,  $\text{CDCl}_3$ ):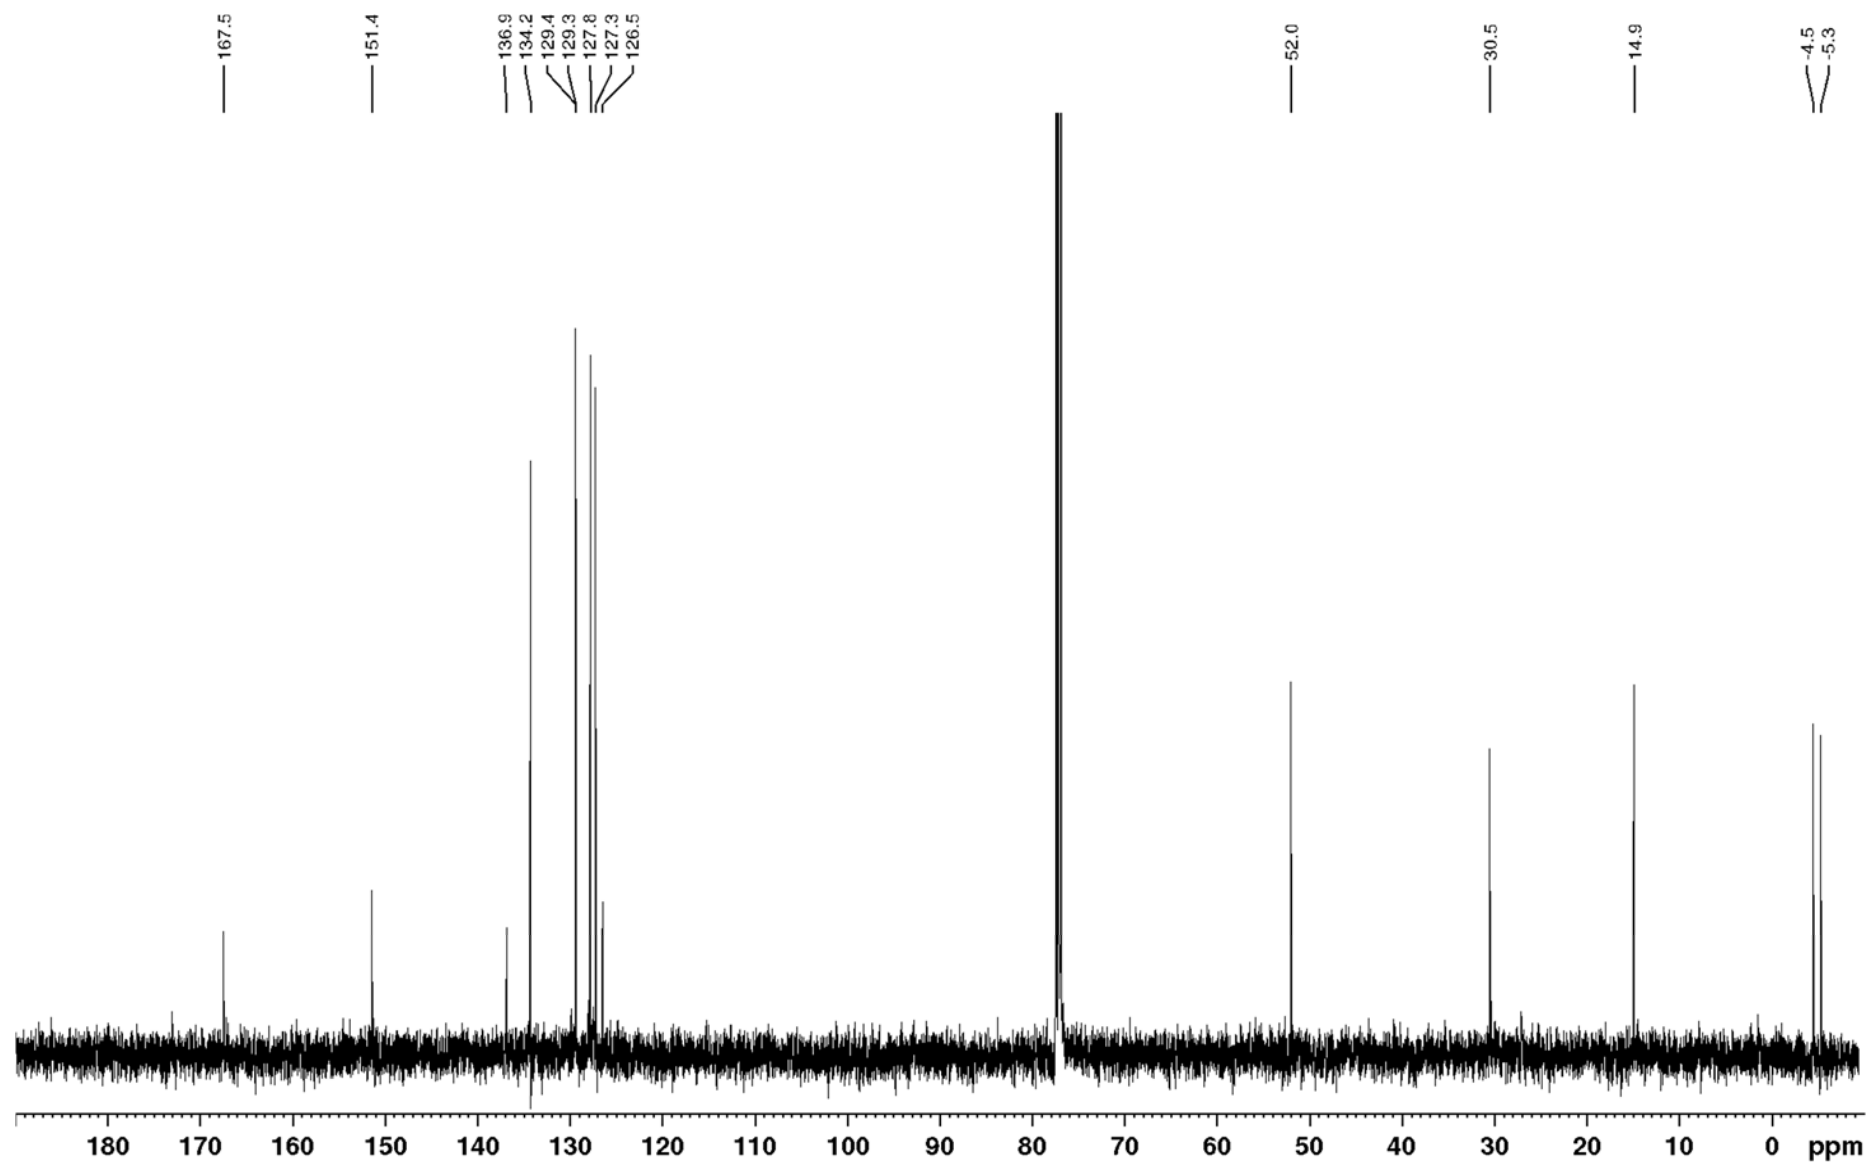

## SUPPORTING INFORMATION

 $^{29}\text{Si}\{^1\text{H}\}$  DEPT NMR (99 MHz,  $\text{CDCl}_3$ ):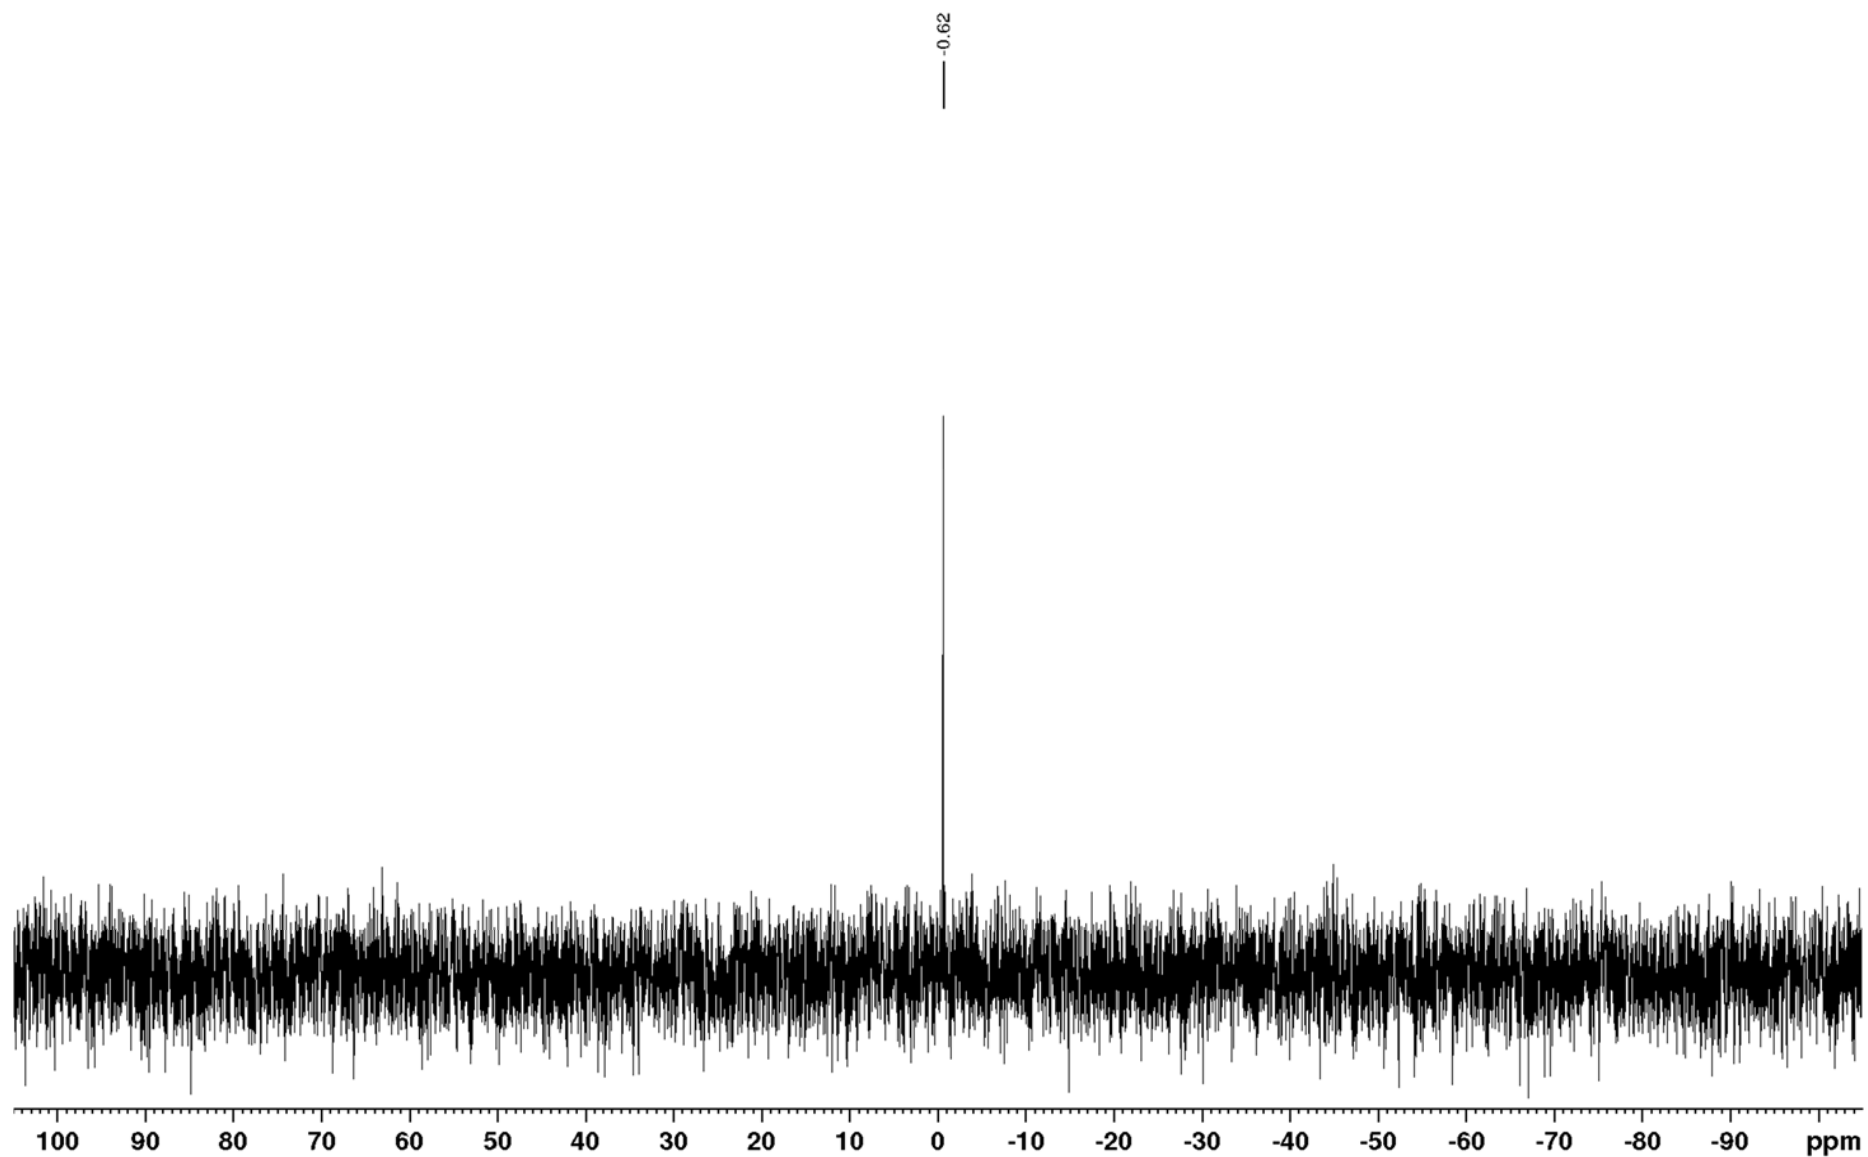

## SUPPORTING INFORMATION

## Dimethyl[1-(naphthalen-1-yl)ethyl](phenyl)silane (41a)

 $^1\text{H}$  NMR (500  
 $\text{CDCl}_3$ ):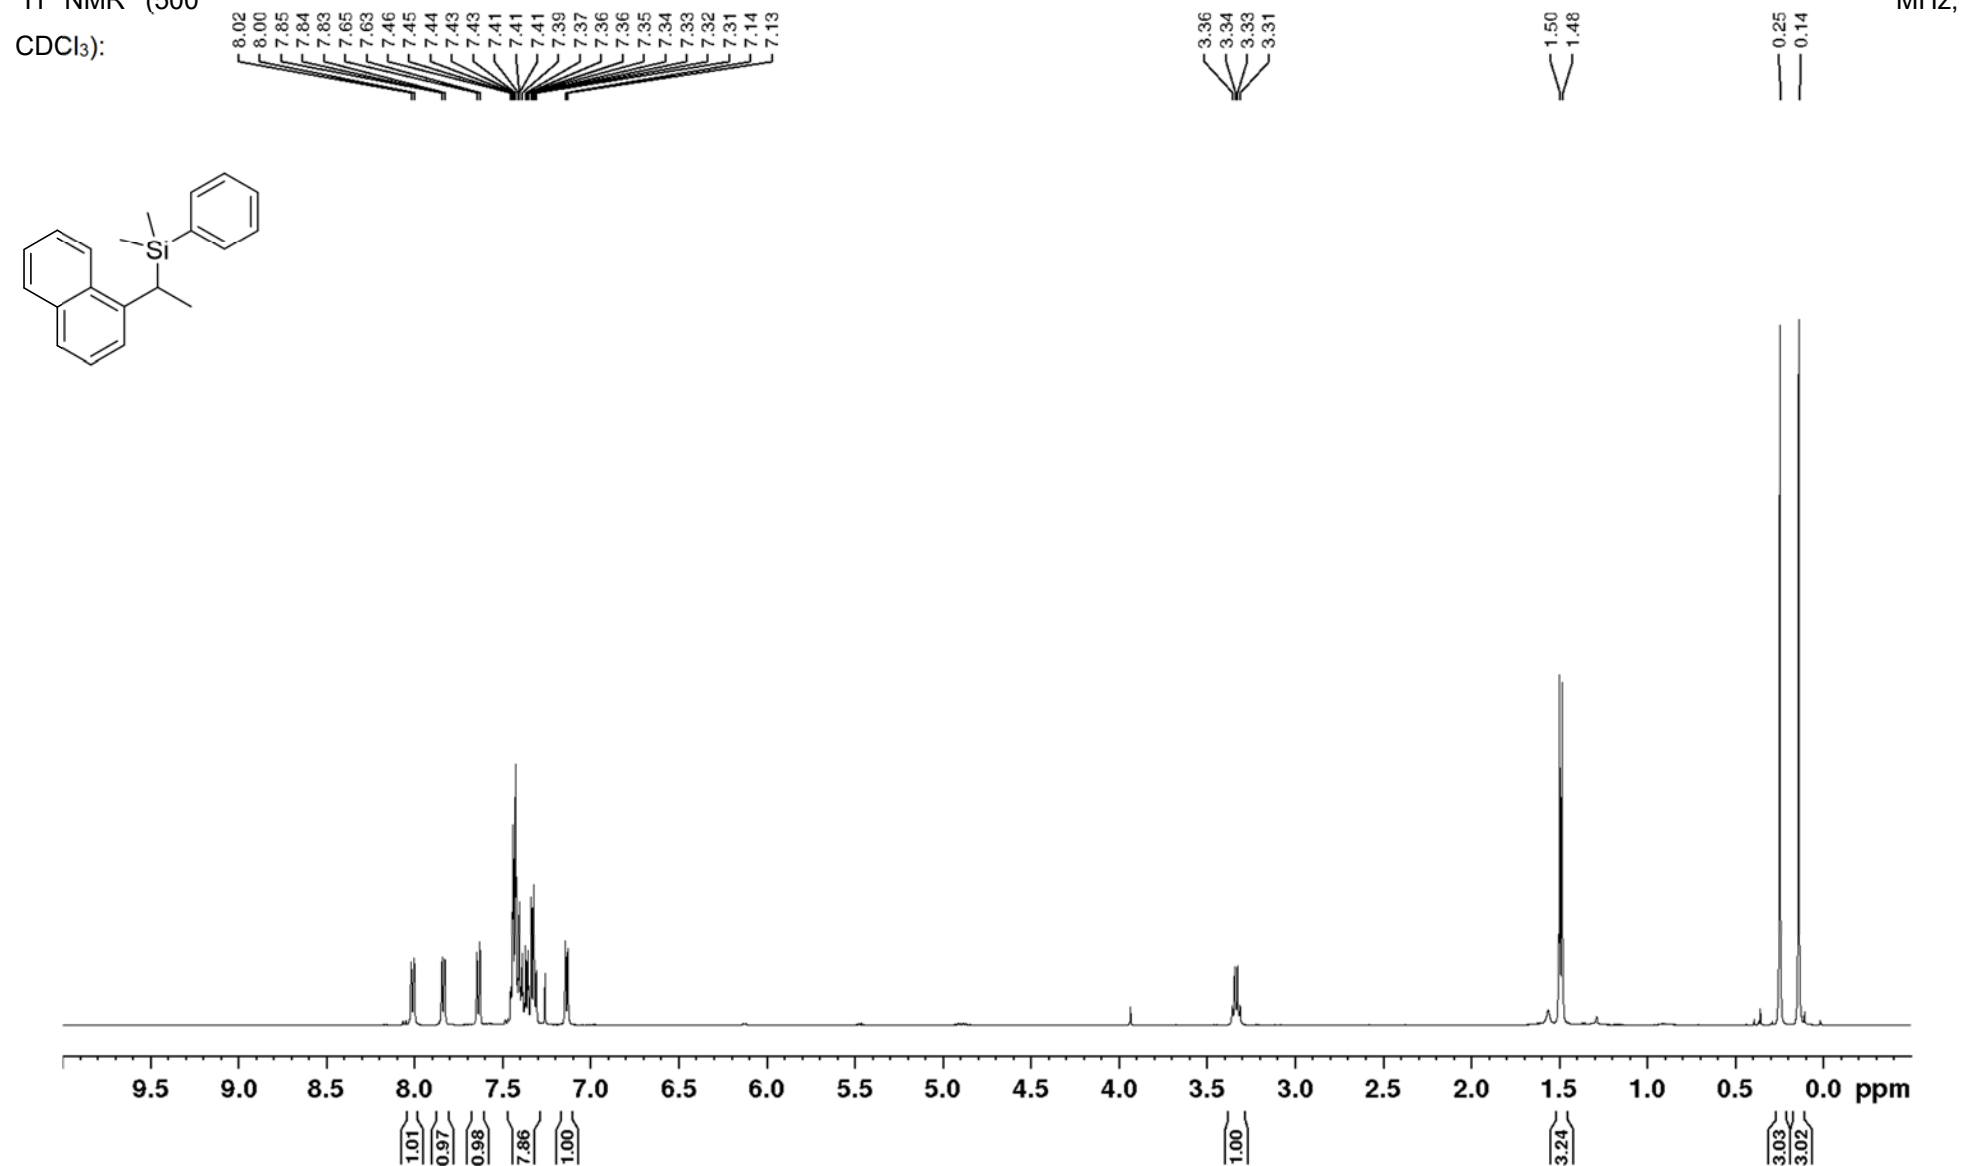

## SUPPORTING INFORMATION

 $^{13}\text{C}\{^1\text{H}\}$  NMR (126 MHz,  $\text{CDCl}_3$ ):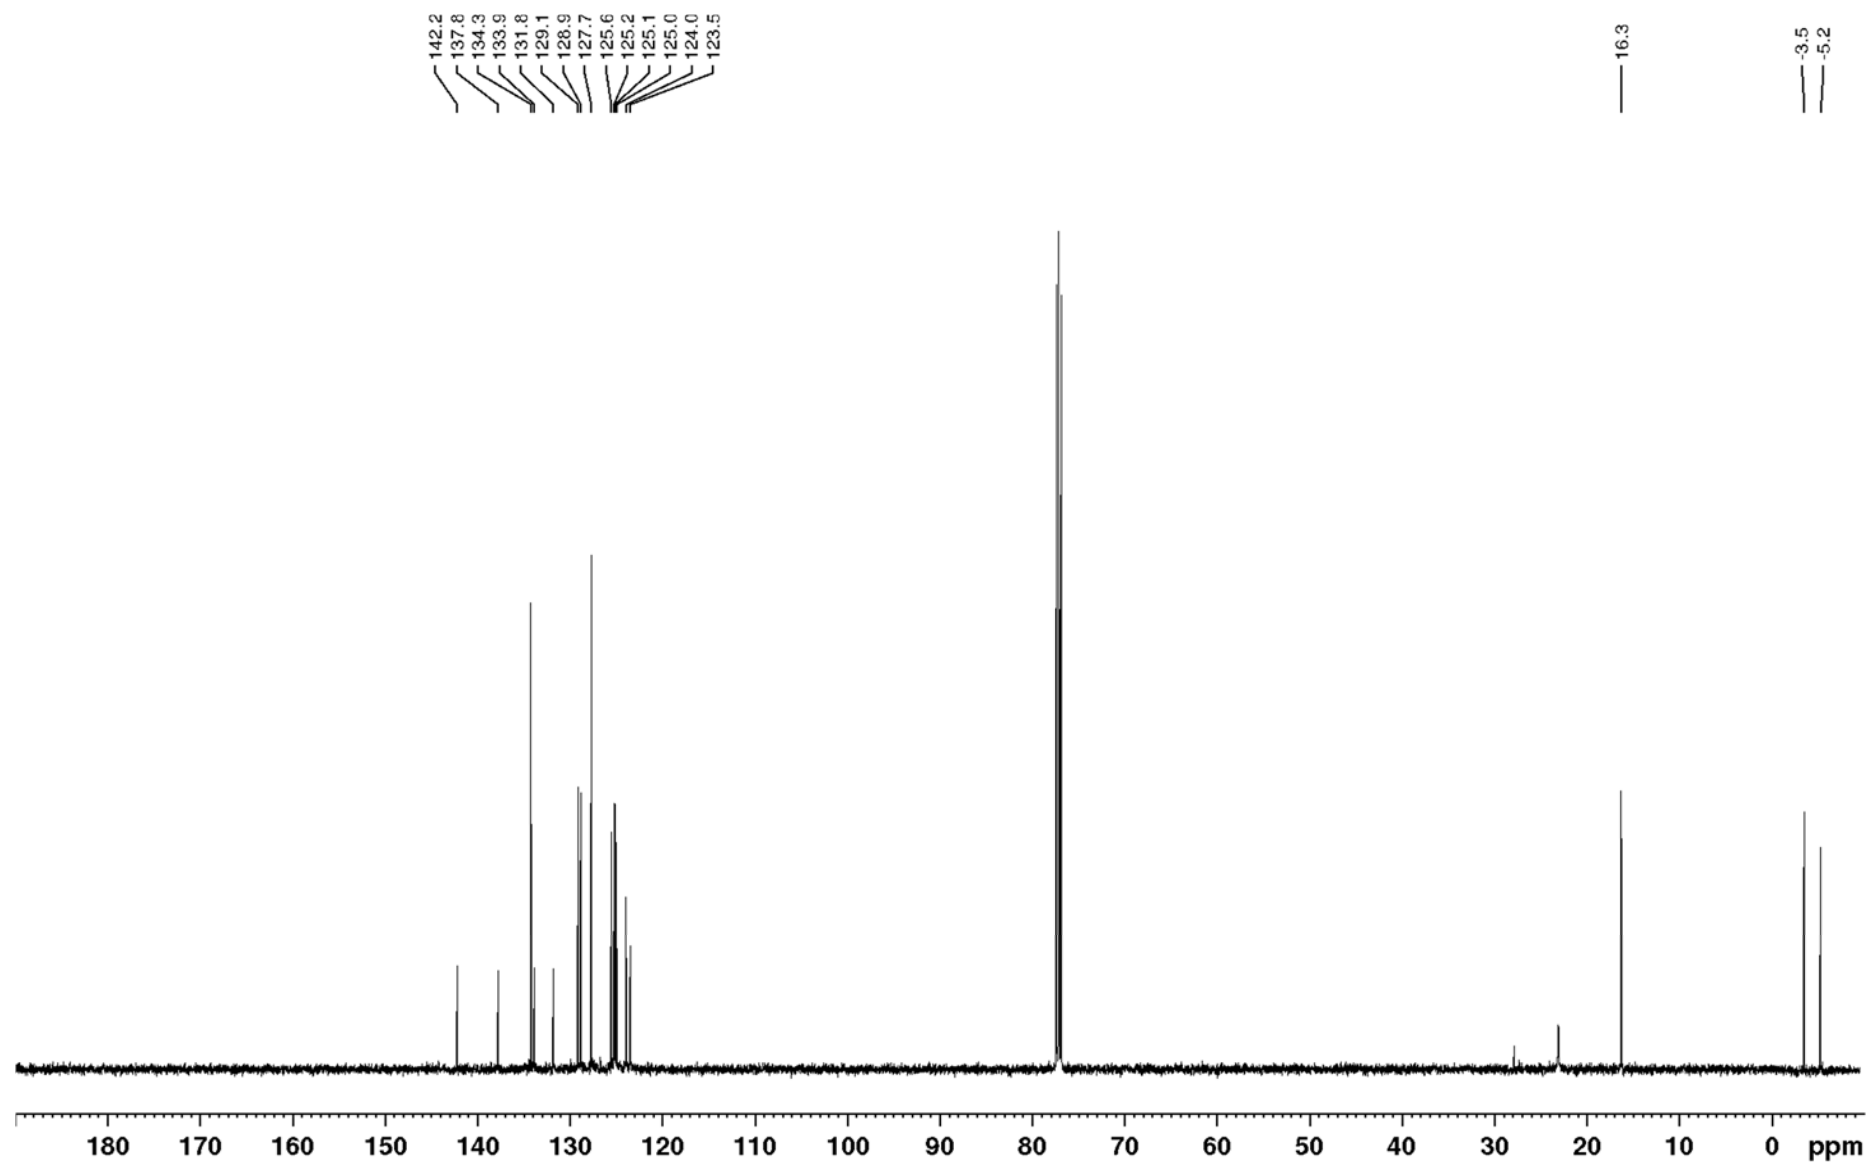

## SUPPORTING INFORMATION

 $^{29}\text{Si}\{^1\text{H}\}$  DEPT NMR (99 MHz,  $\text{CDCl}_3$ ):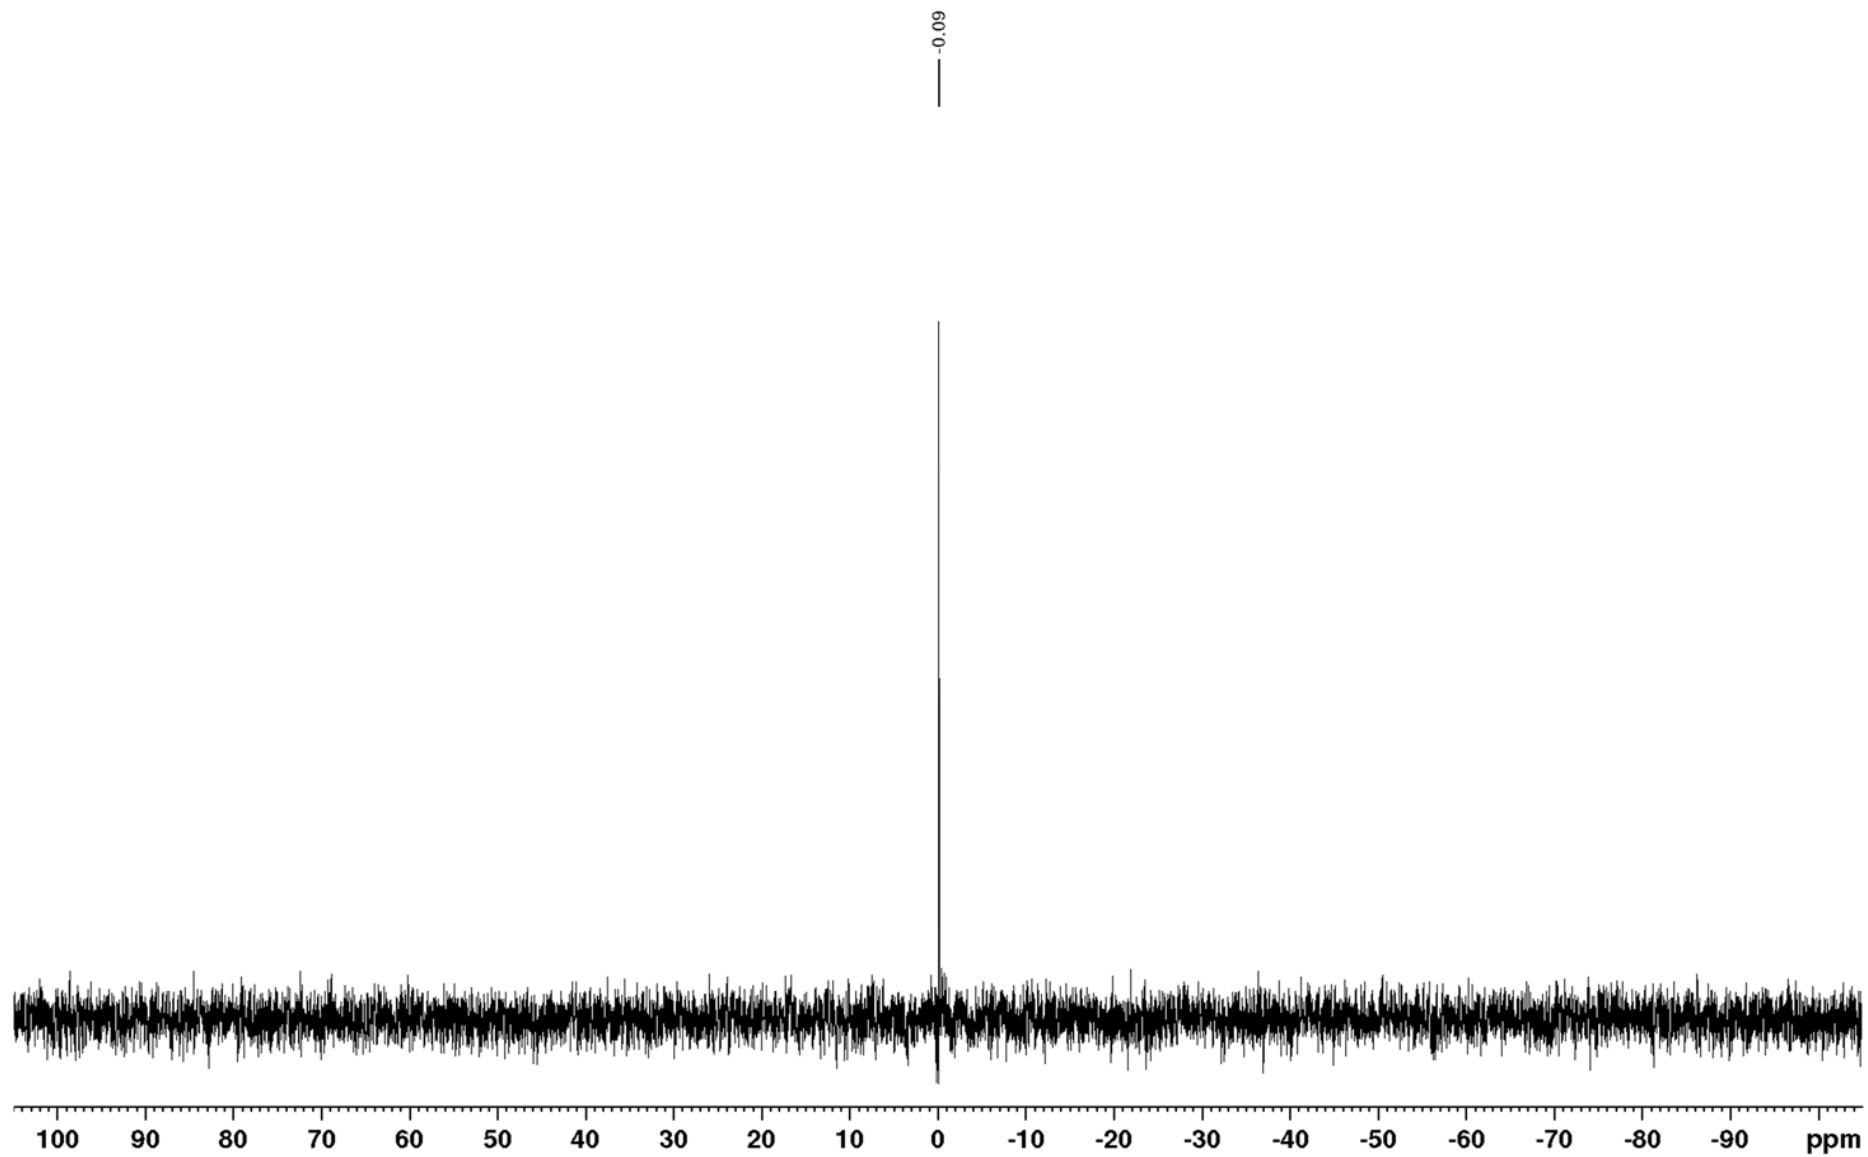

## SUPPORTING INFORMATION

## Dimethyl[1-(naphthalen-2-yl)ethyl](phenyl)silane (4ma)

$^1\text{H}$  NMR (500  
 $\text{CDCl}_3$ ):

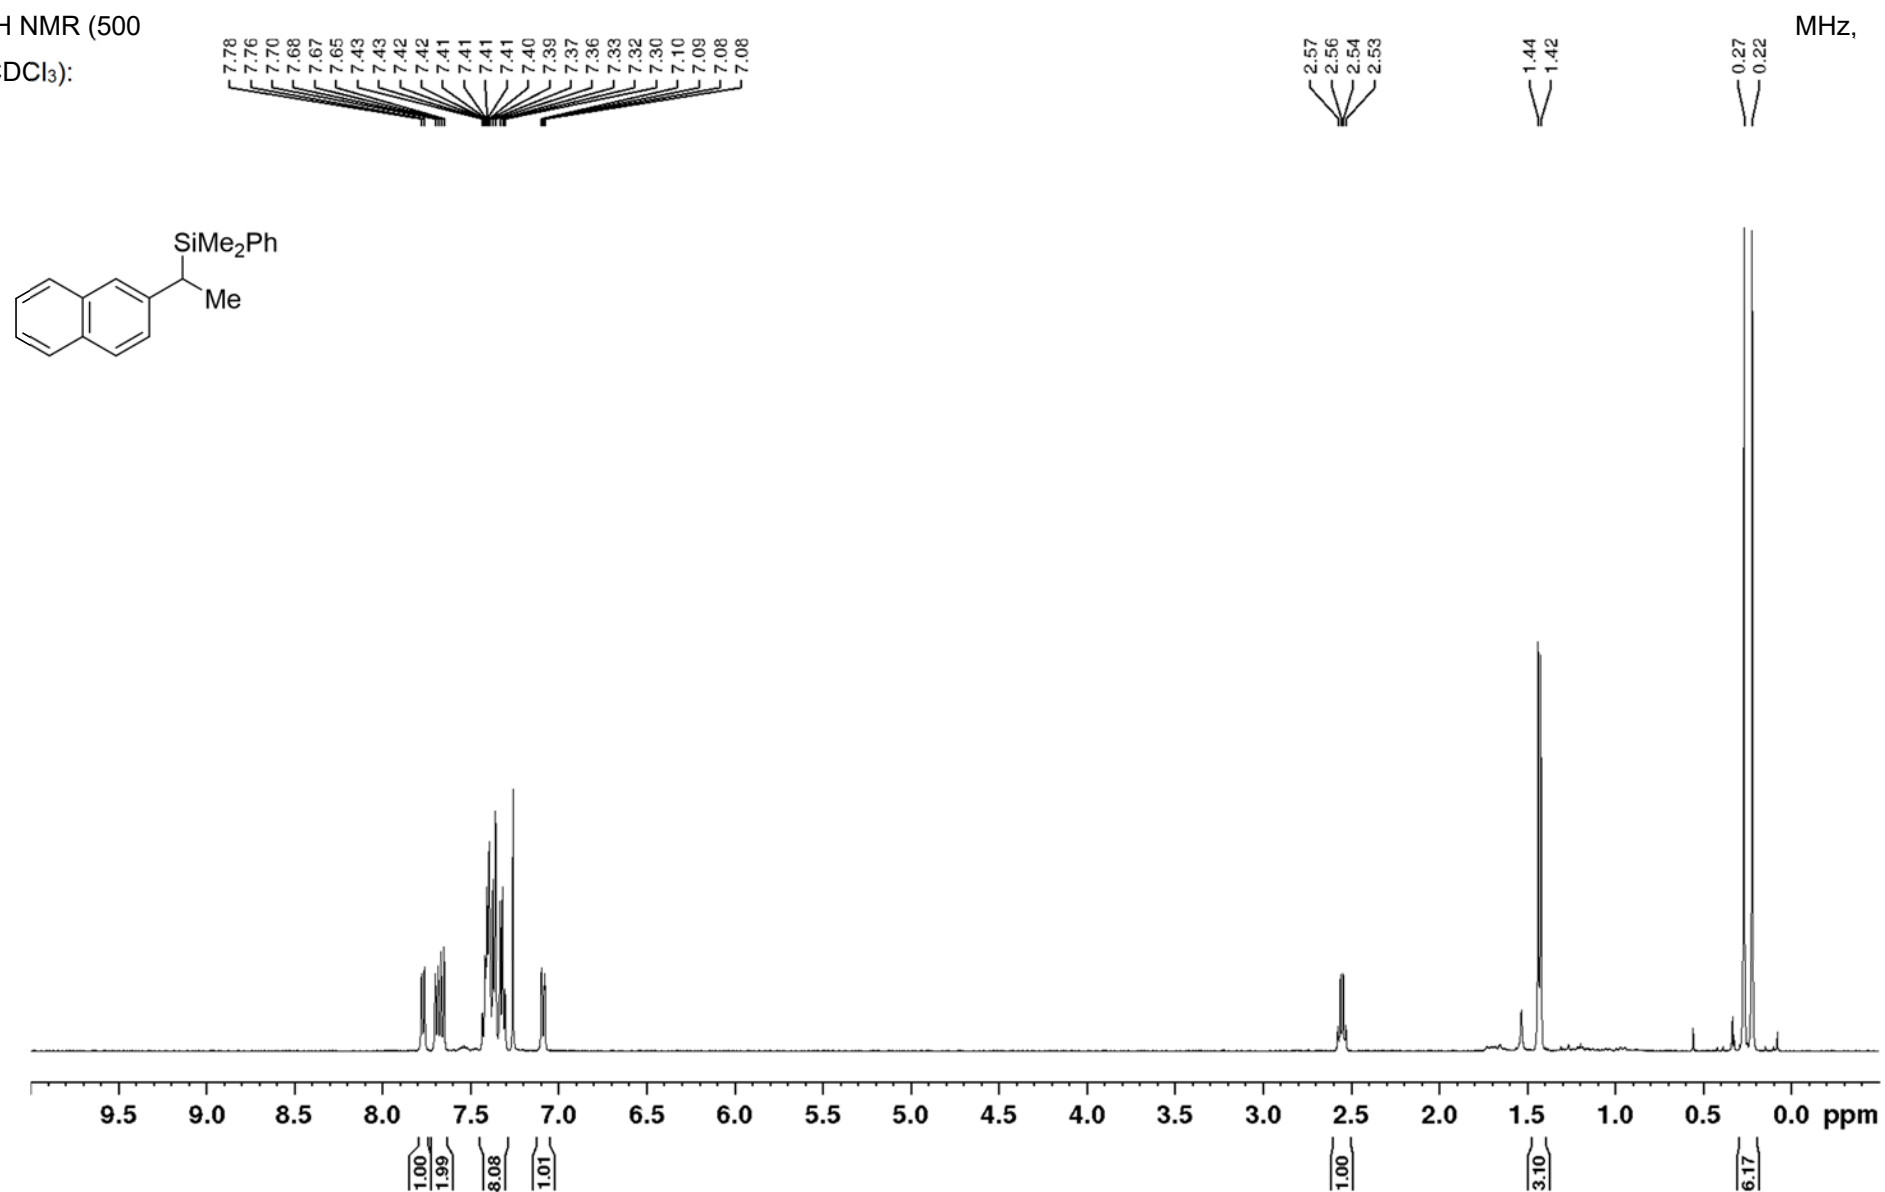



## SUPPORTING INFORMATION

 $^{13}\text{C}\{^1\text{H}\}$  NMR (126 MHz,  $\text{CDCl}_3$ ):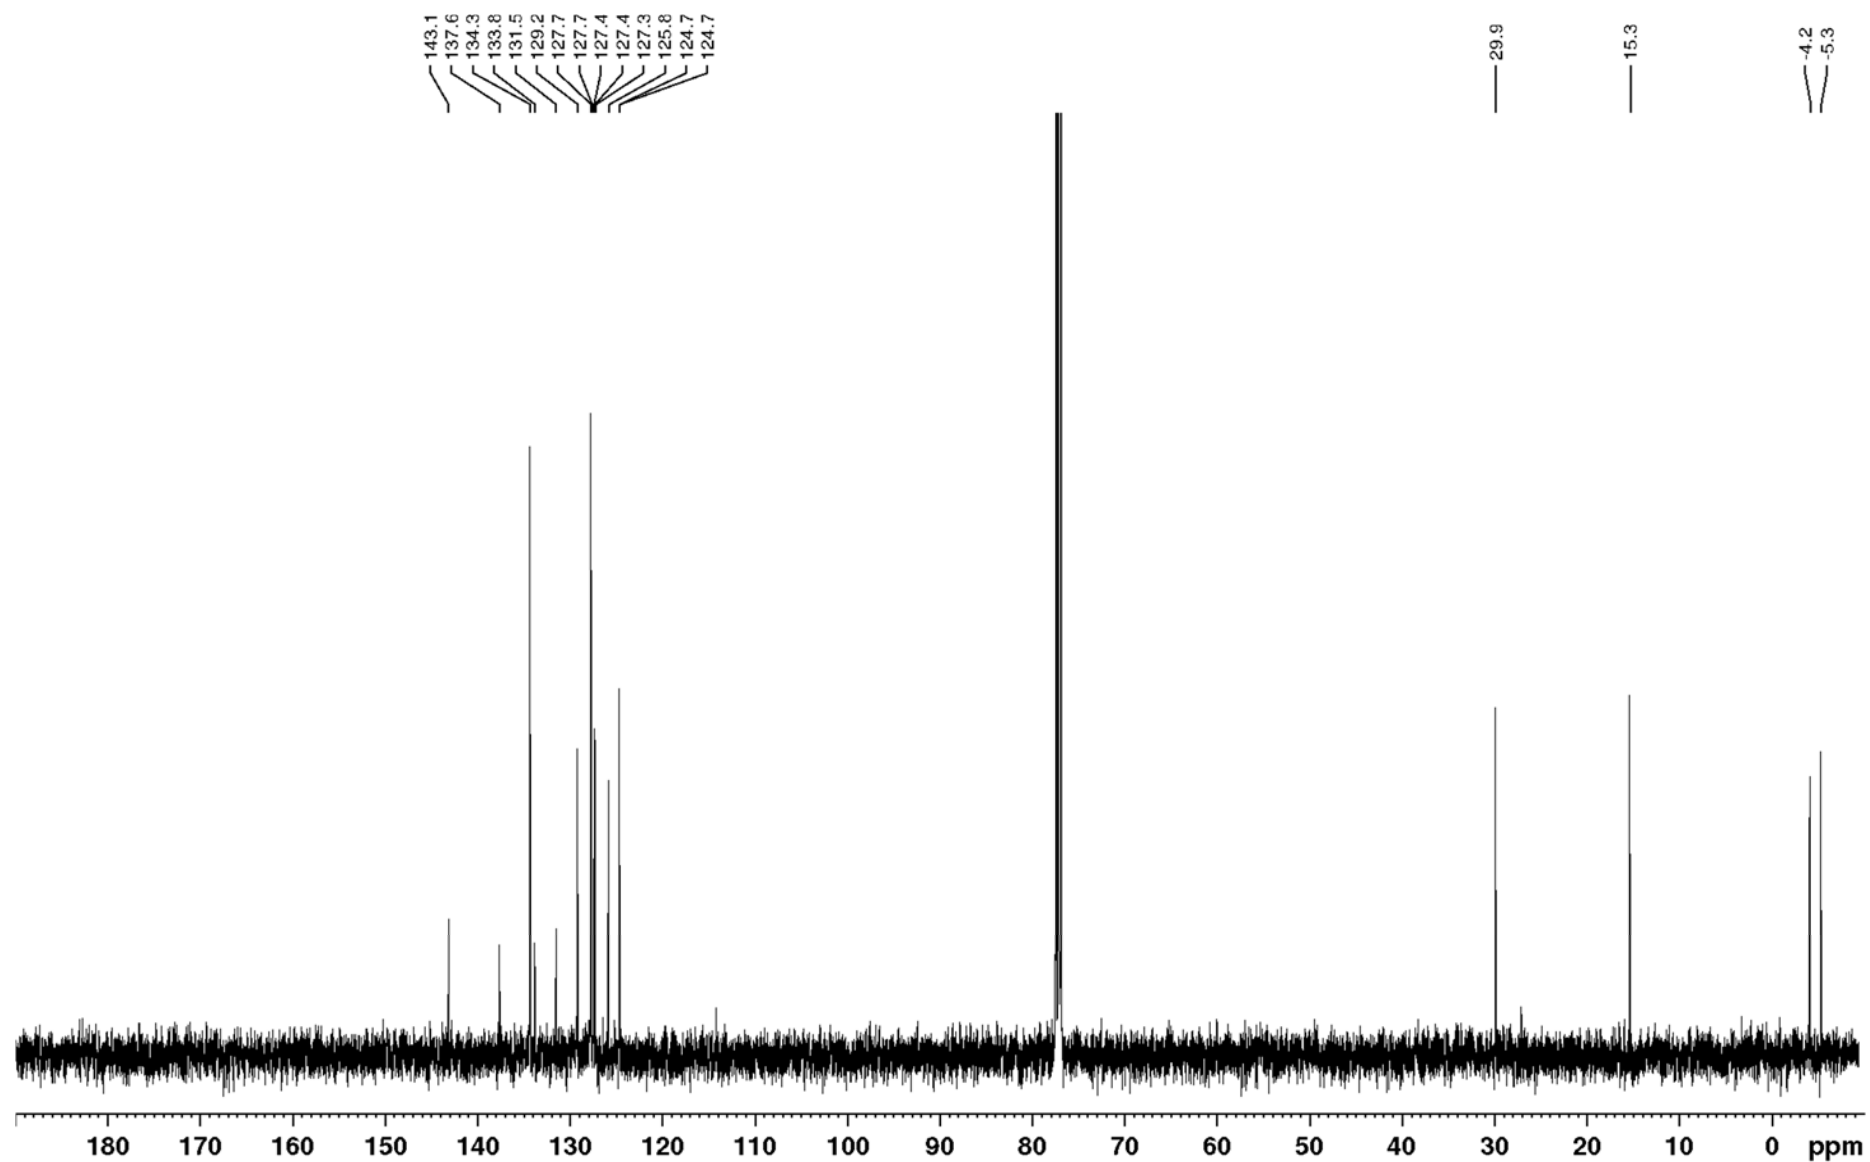

## SUPPORTING INFORMATION

 $^{29}\text{Si}\{^1\text{H}\}$  DEPT NMR (99 MHz,  $\text{CDCl}_3$ ):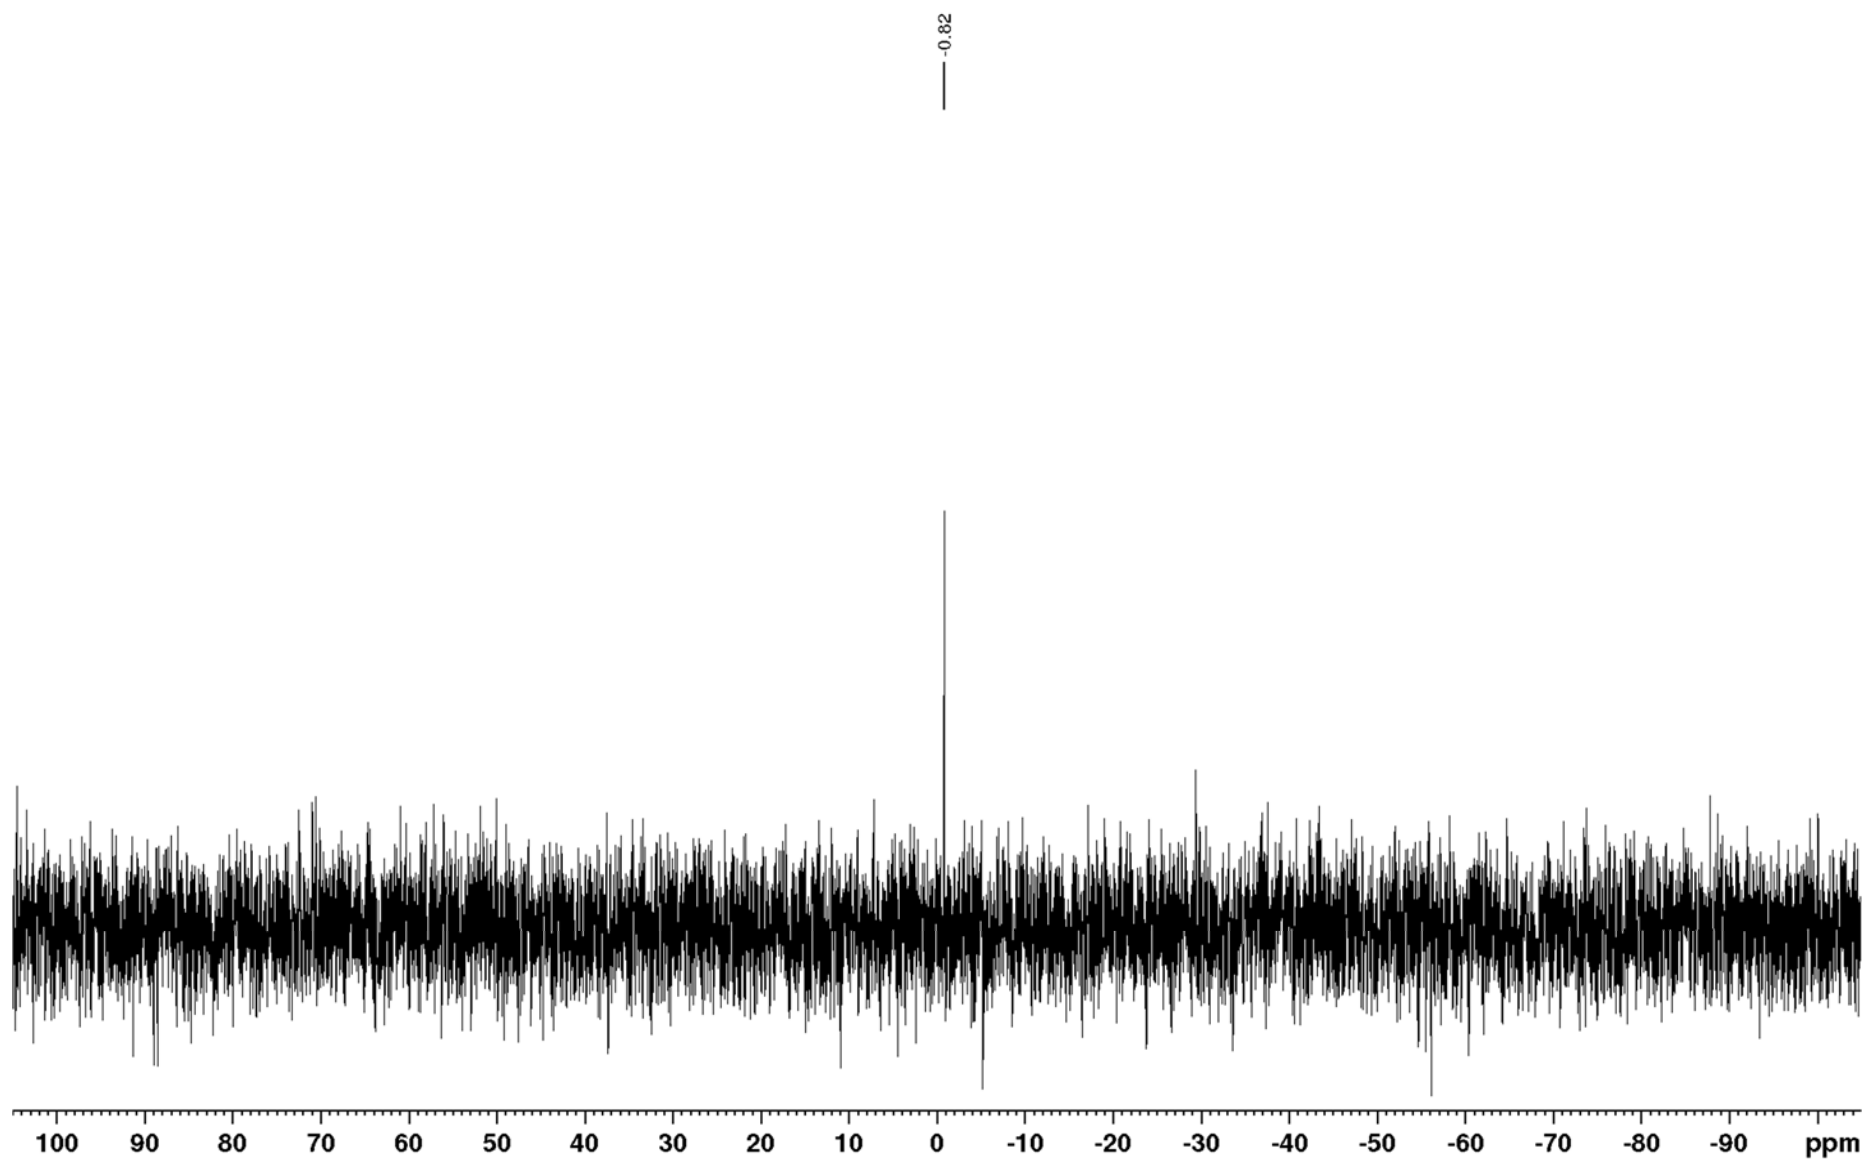

## SUPPORTING INFORMATION

**[1-(Benzofuran-5-yl)ethyl]dimethyl(phenyl)silane (4na)**<sup>1</sup>H NMR (500 MHz,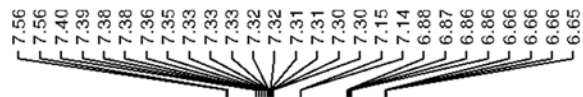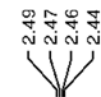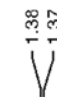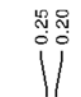CDCl<sub>3</sub>):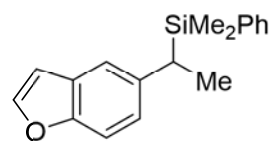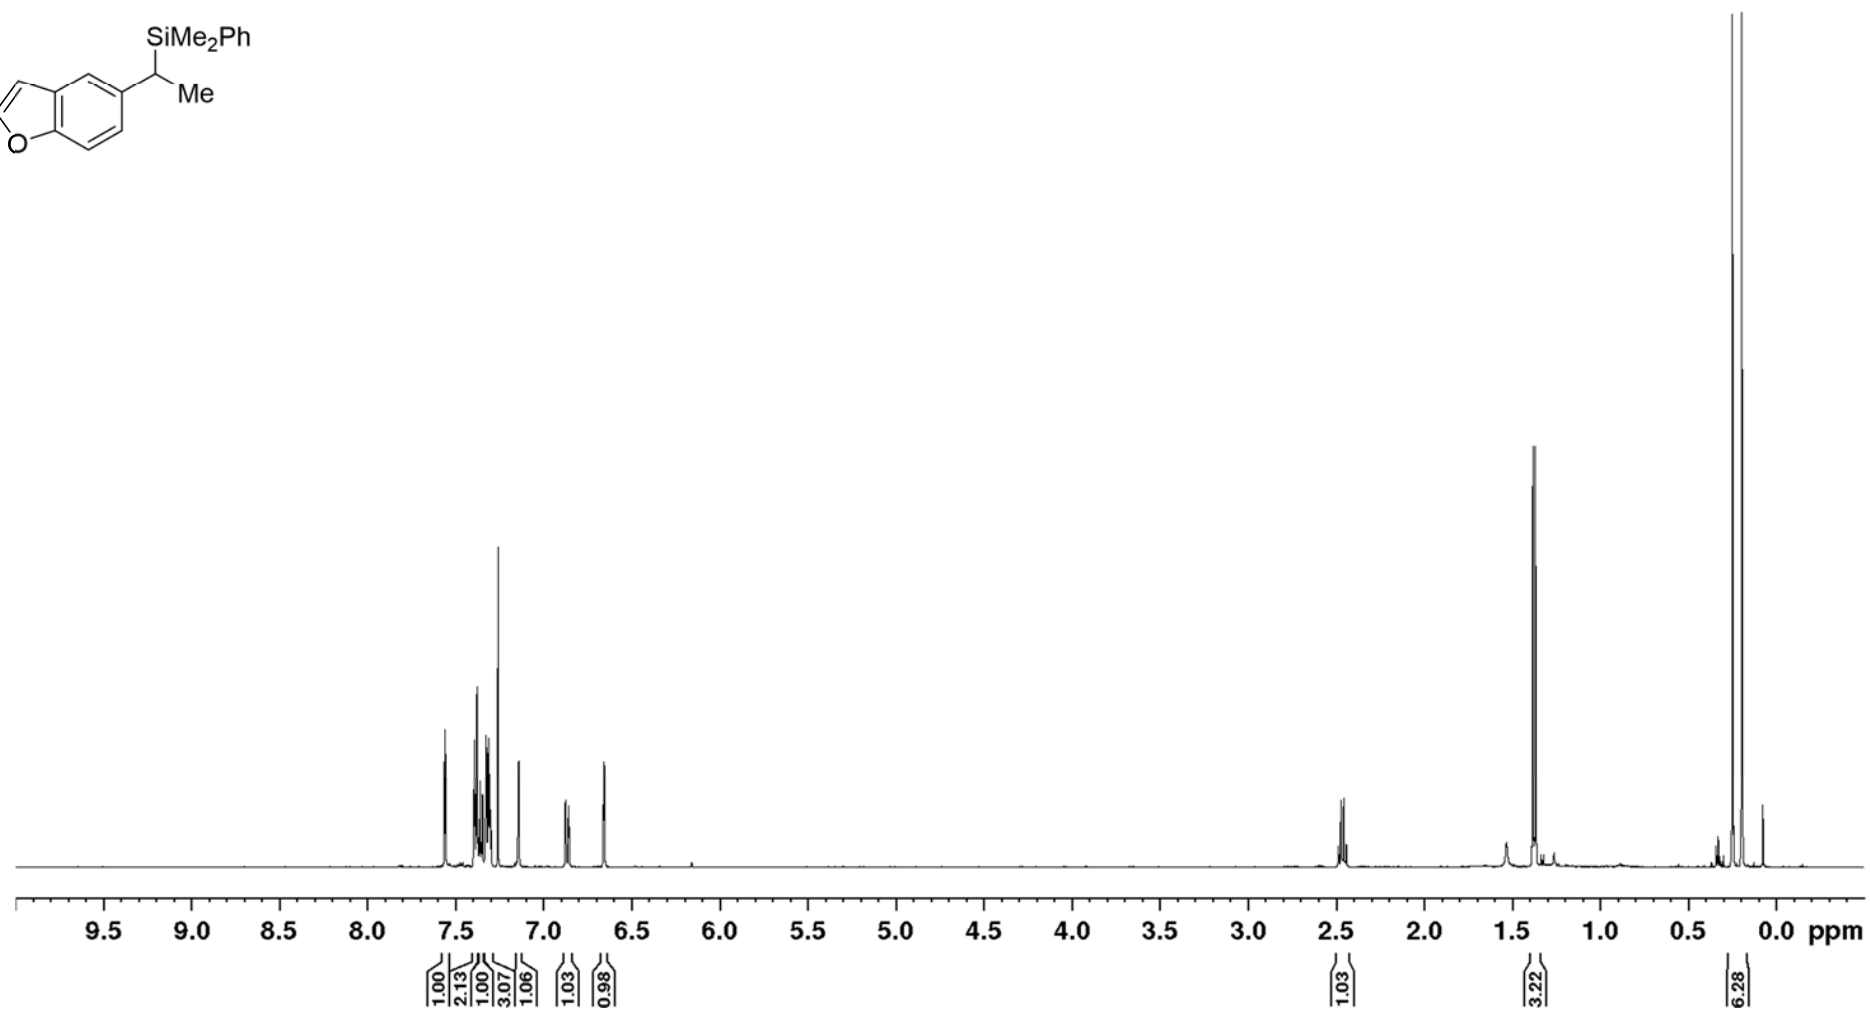

## SUPPORTING INFORMATION

 $^{13}\text{C}\{^1\text{H}\}$  NMR (126 MHz,  $\text{CDCl}_3$ ):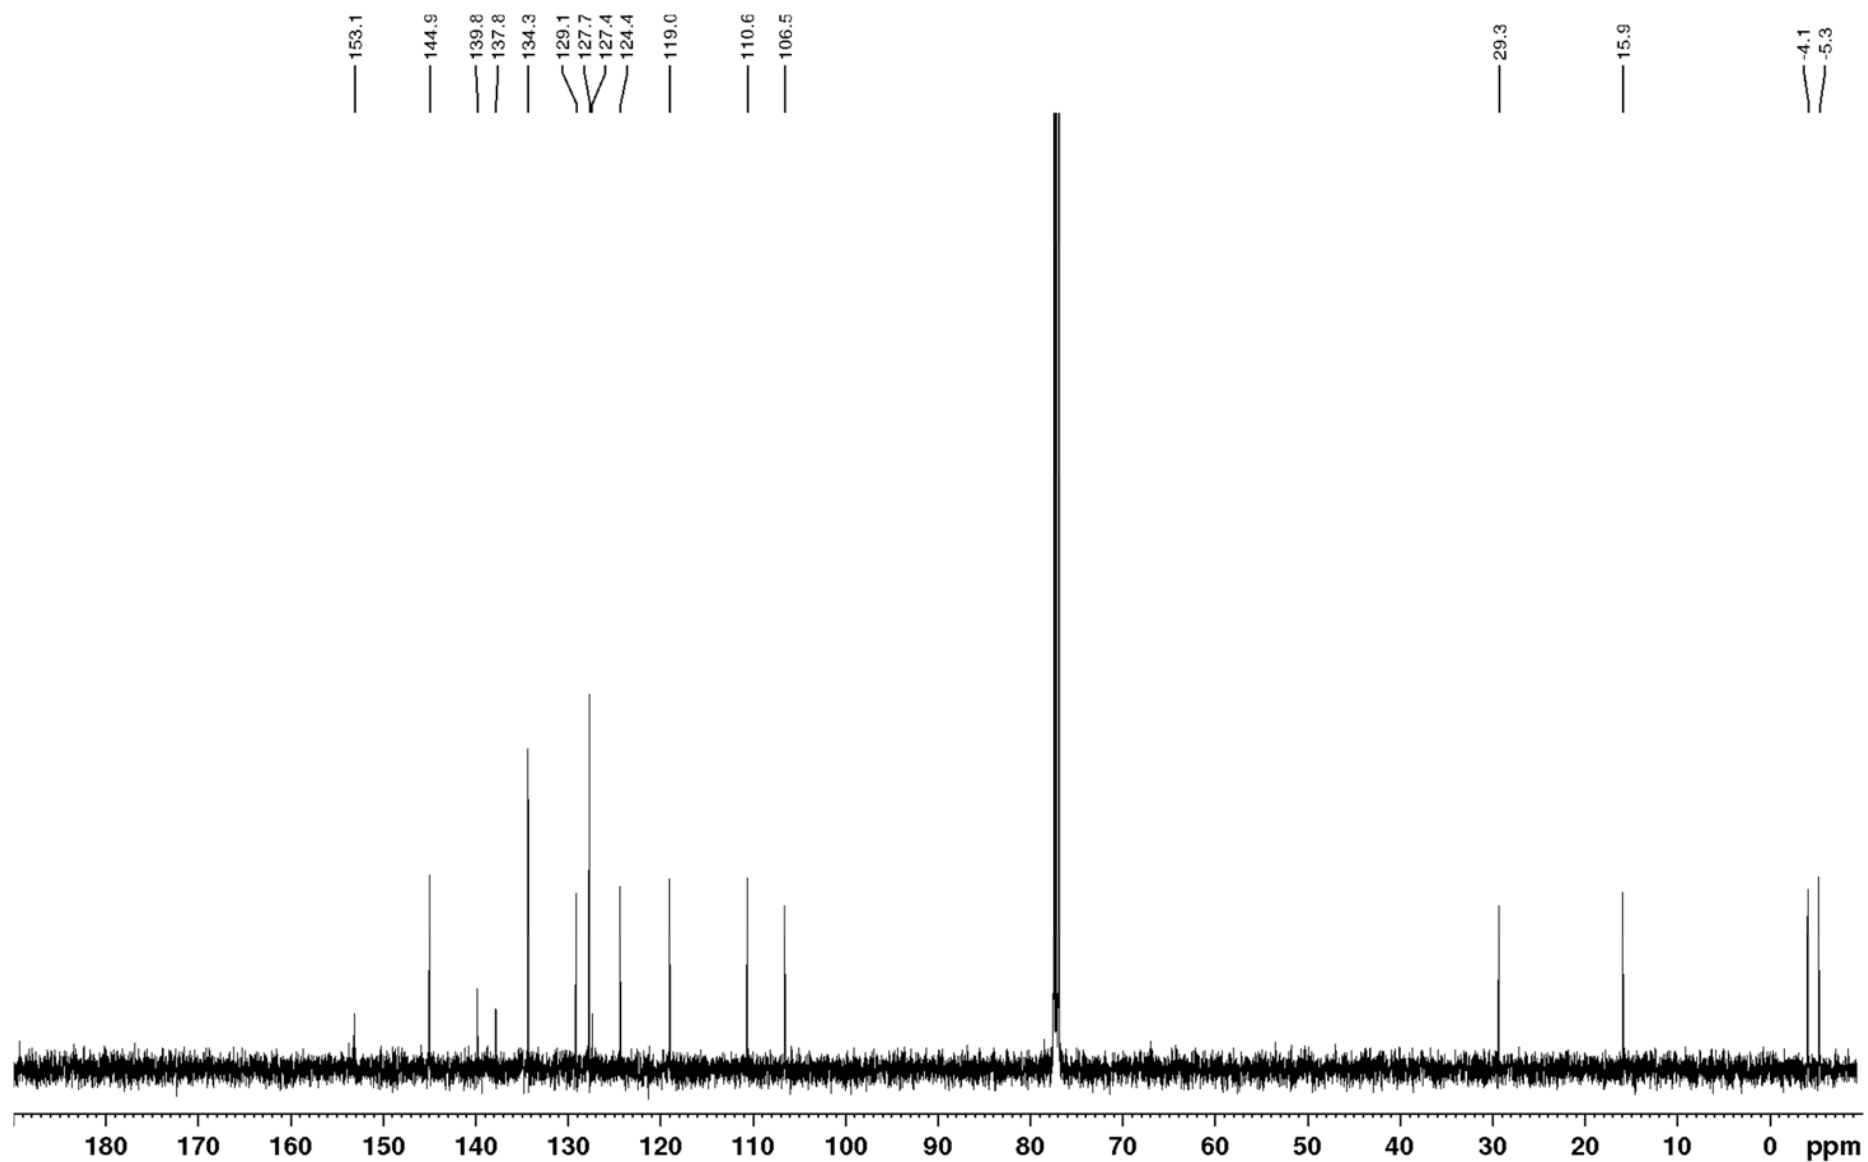

## SUPPORTING INFORMATION

$^{29}\text{Si}\{^1\text{H}\}$  DEPT NMR (99 MHz,  $\text{CDCl}_3$ ):

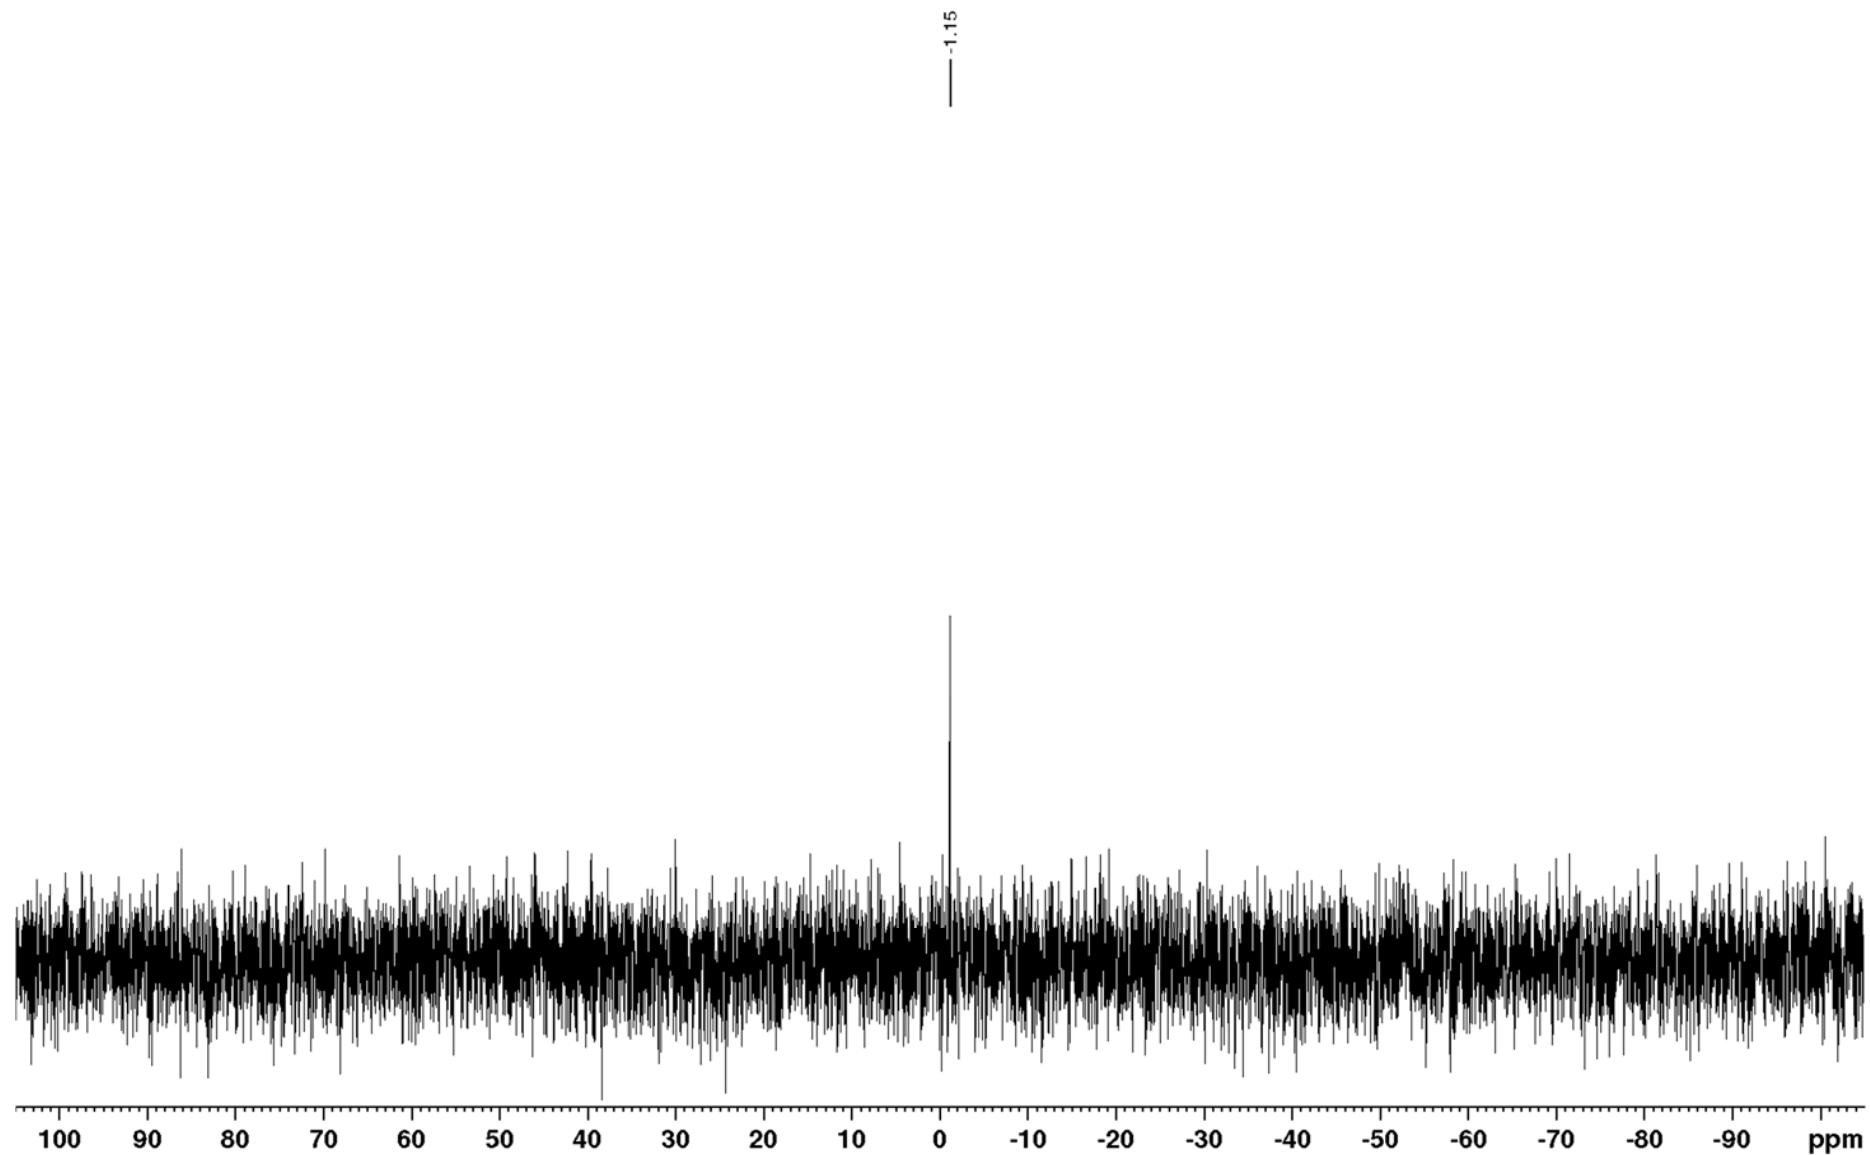

## SUPPORTING INFORMATION

## Dimethyl(phenyl)[1-(thiophen-3-yl)ethyl]silane (4oa)

 $^1\text{H}$  NMR  
 $\text{CDCl}_3$ :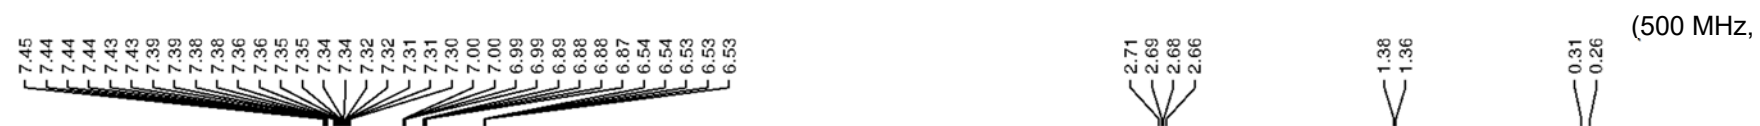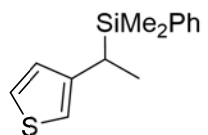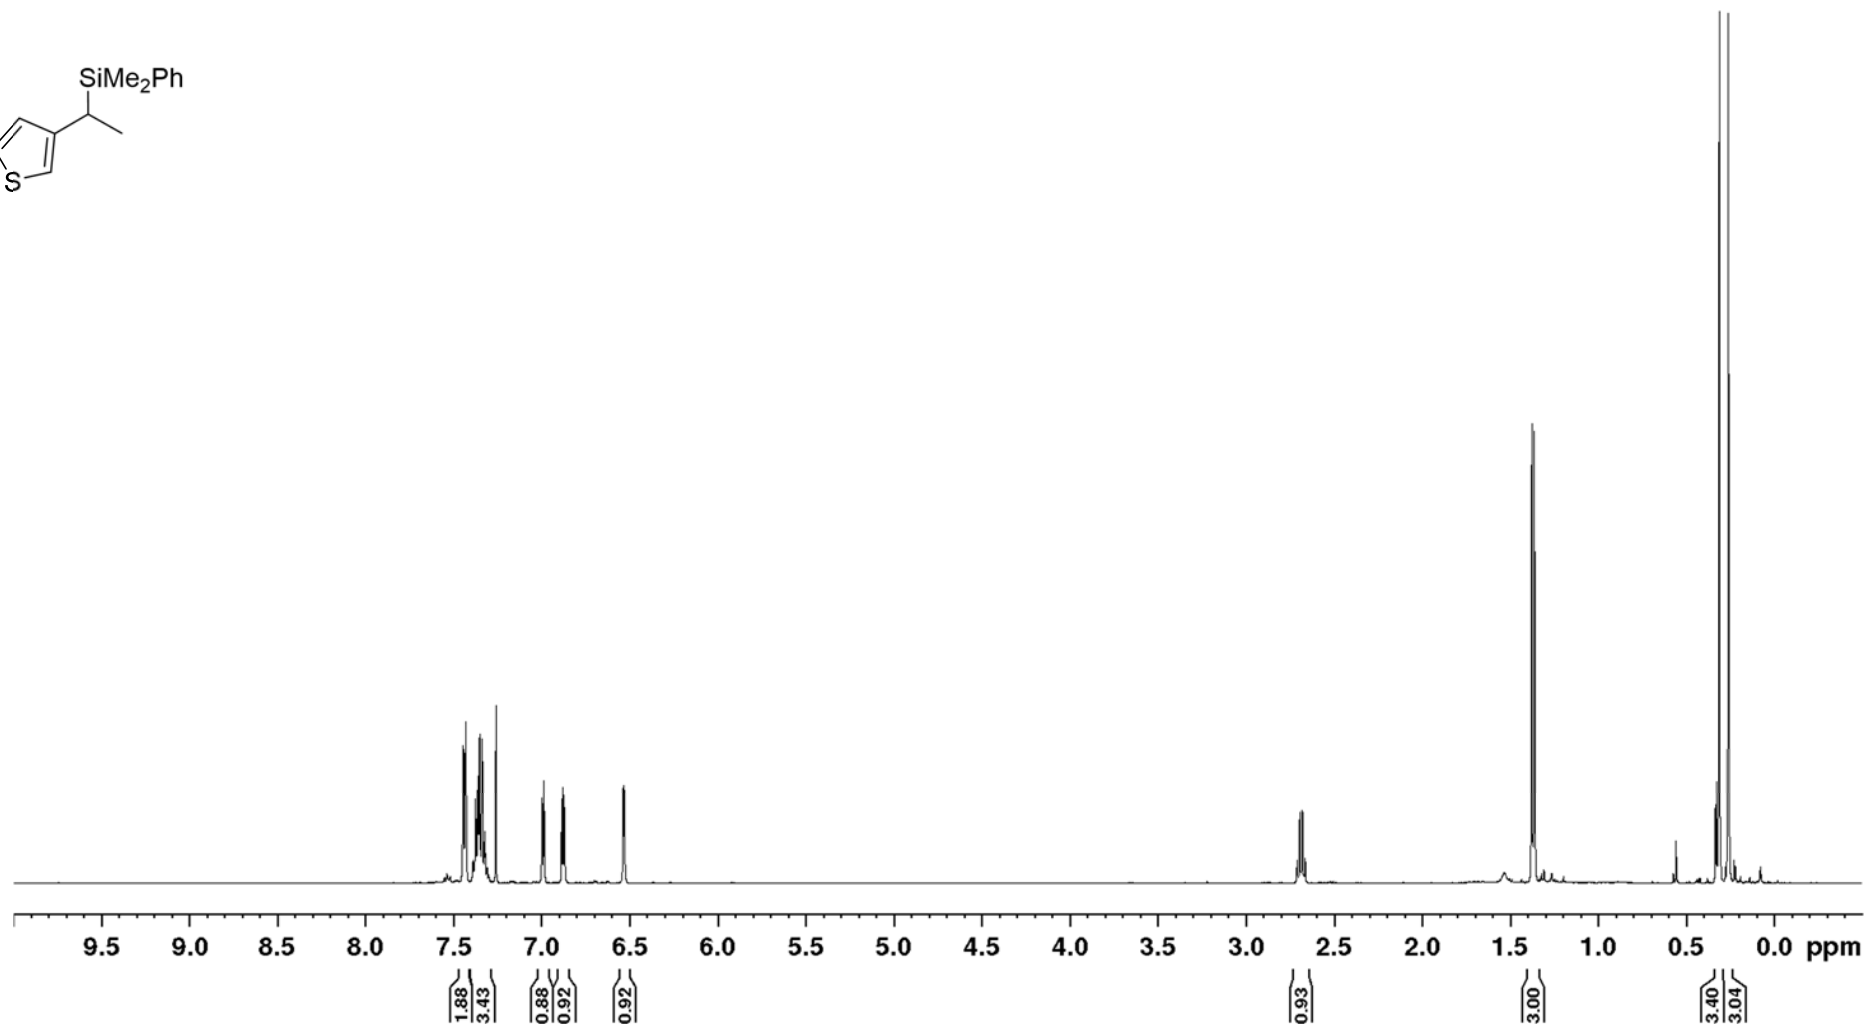

## SUPPORTING INFORMATION

 $^{13}\text{C}\{^1\text{H}\}$  NMR (126 MHz,  $\text{CDCl}_3$ ):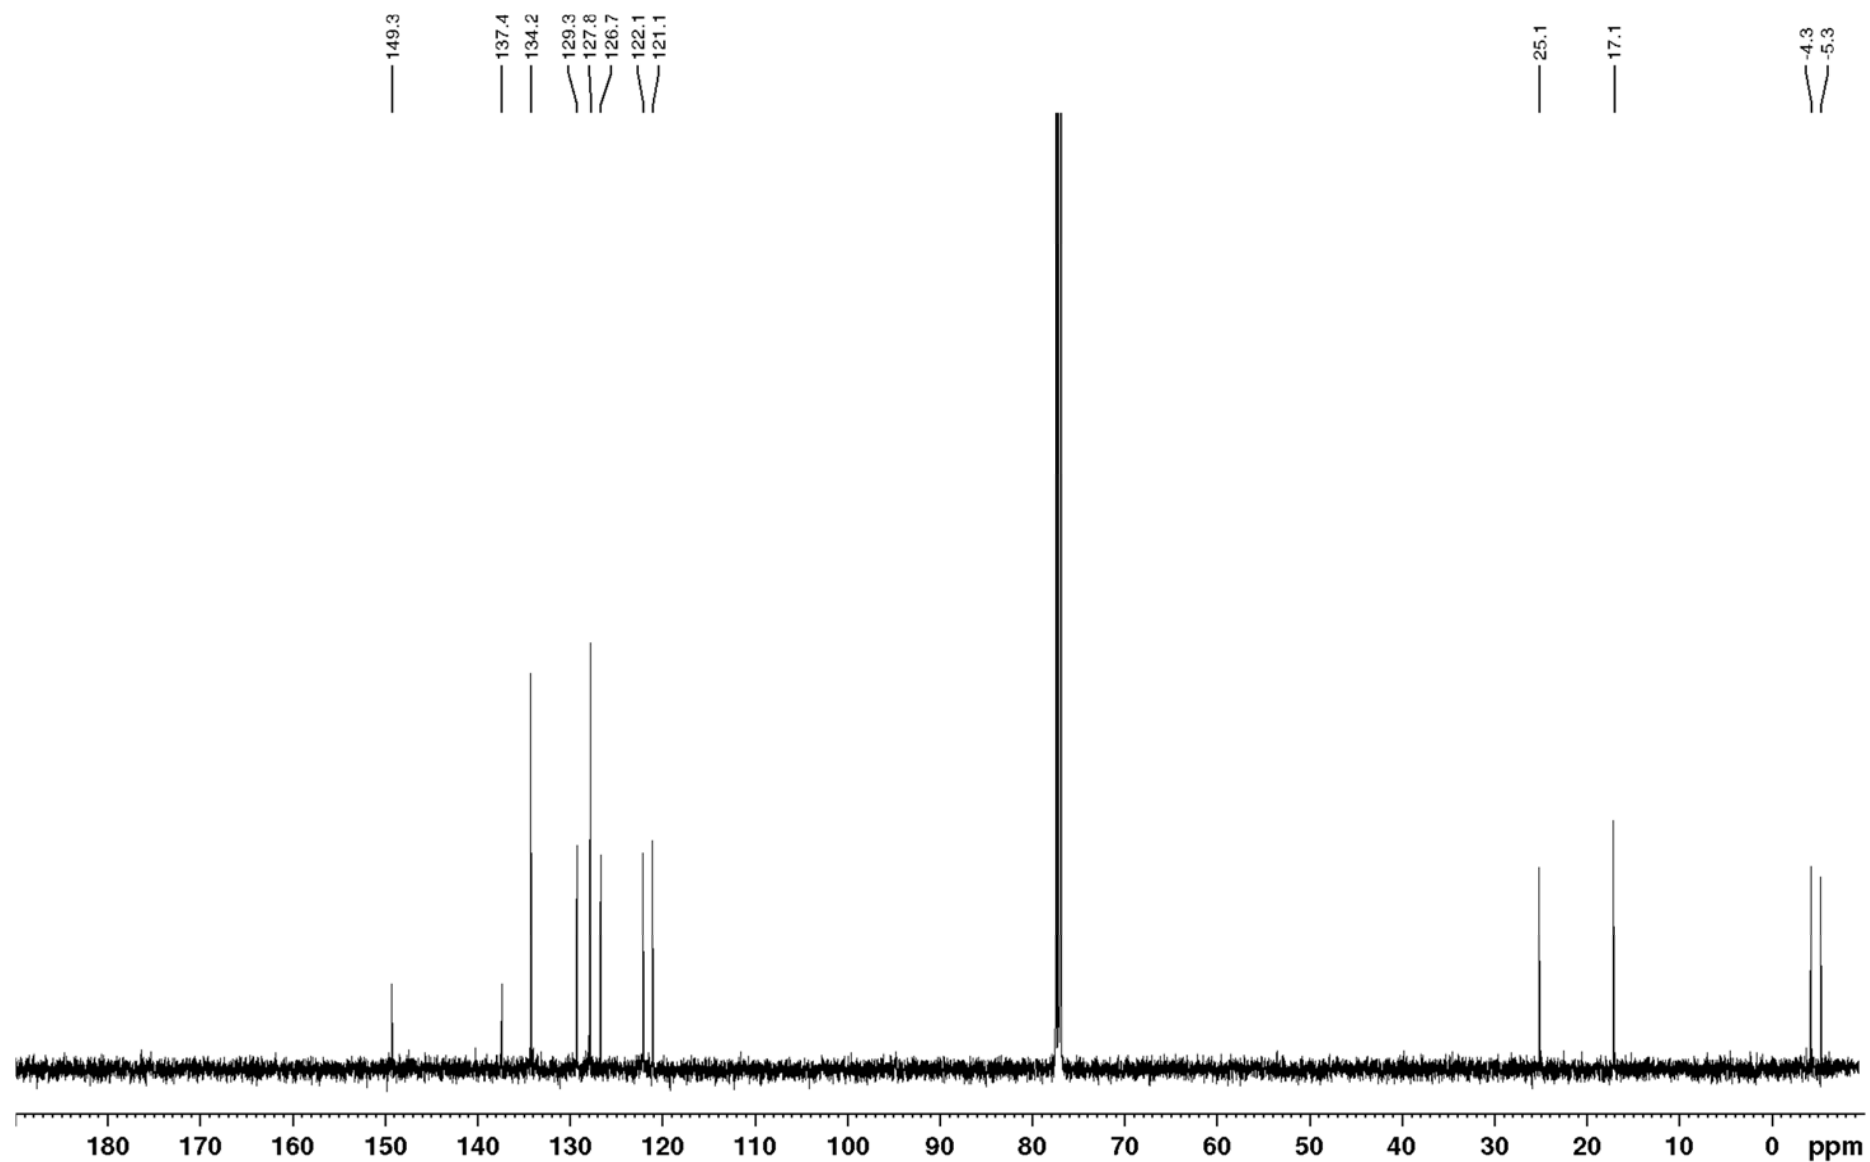

## SUPPORTING INFORMATION

 $^{29}\text{Si}\{^1\text{H}\}$  DEPT NMR (99 MHz,  $\text{CDCl}_3$ ):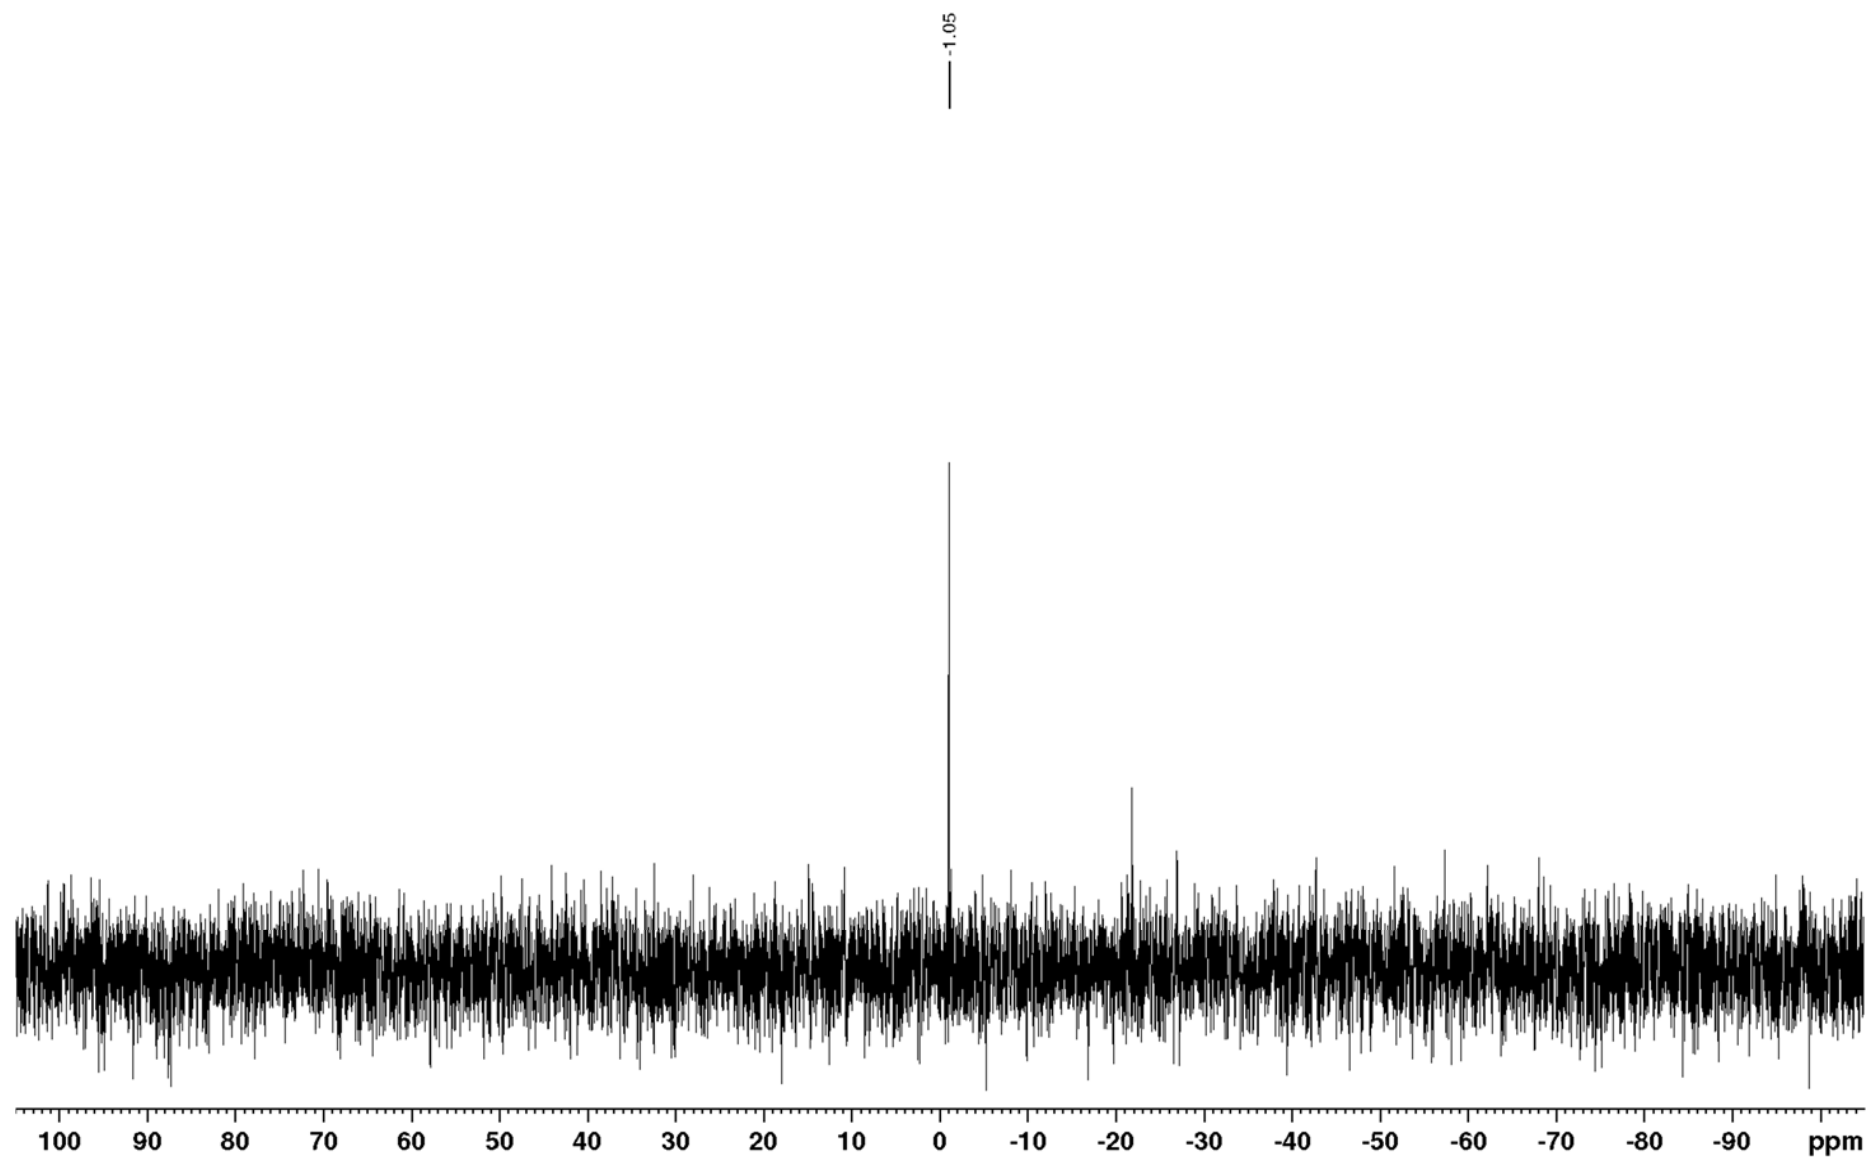



## SUPPORTING INFORMATION

## Dimethyl(phenyl)(1-phenylpentyl)silane (4pa)

$^1\text{H}$  NMR (500 MHz,  
 $\text{CDCl}_3$ ):

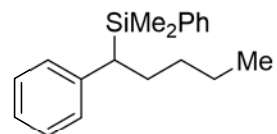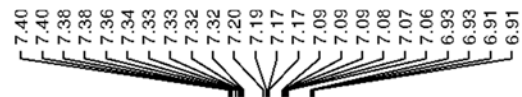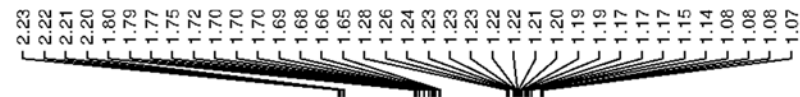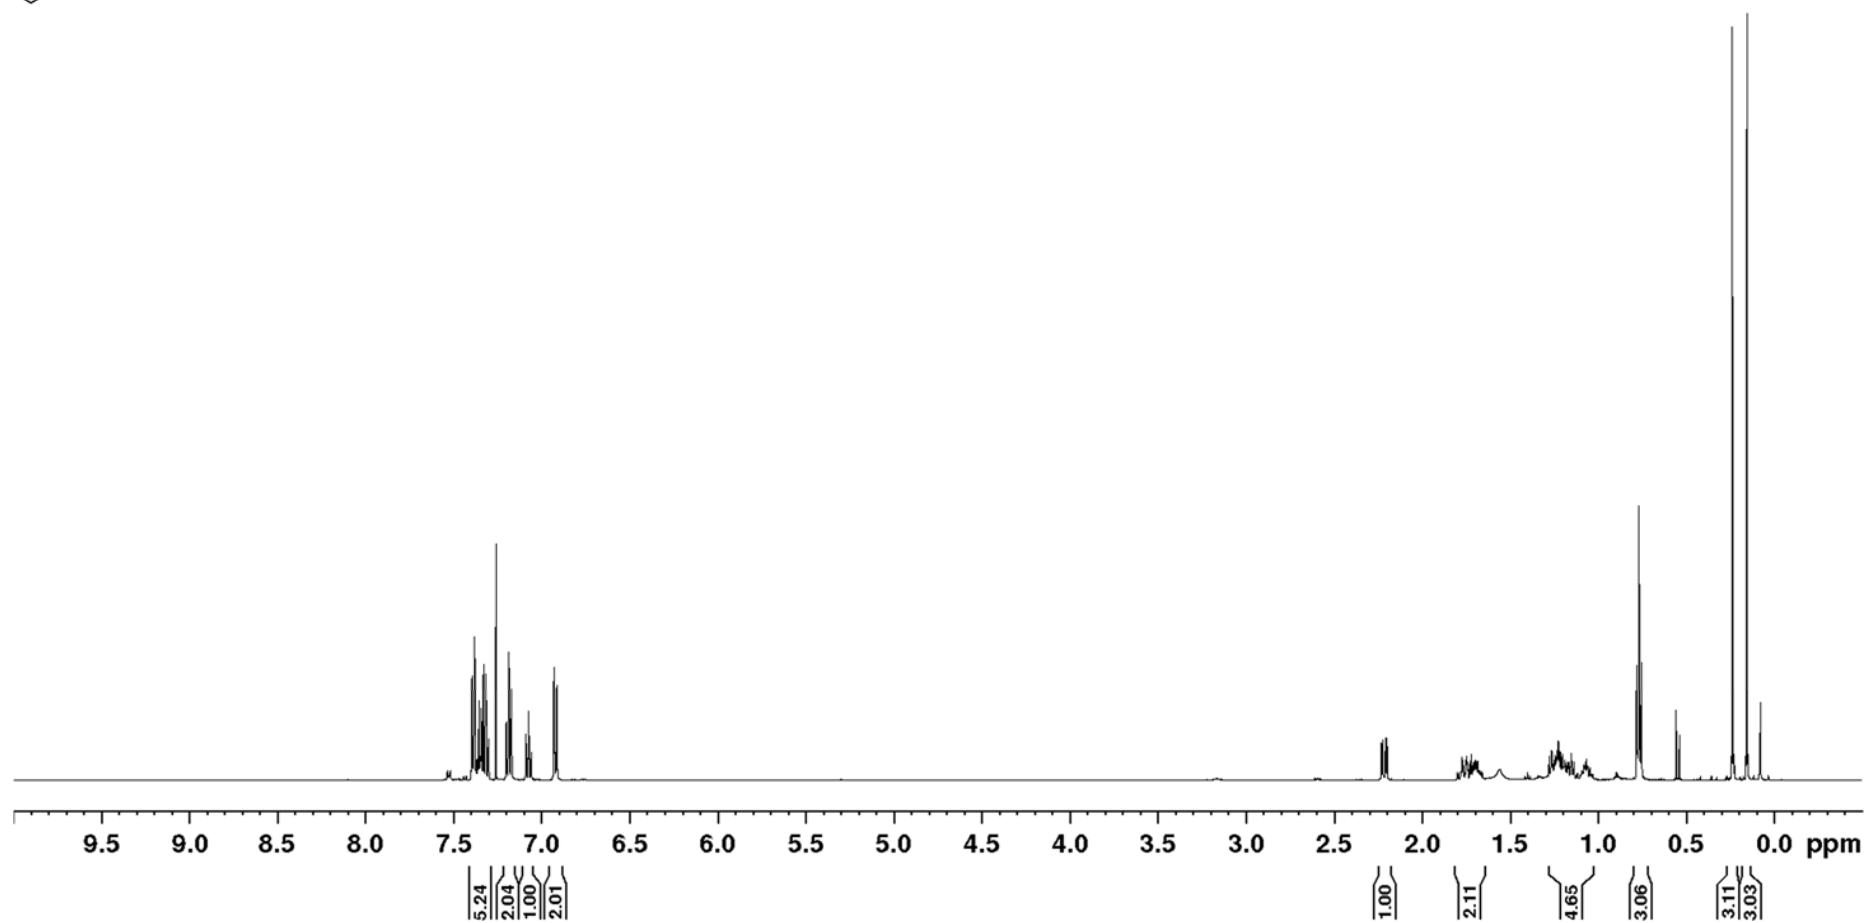

## SUPPORTING INFORMATION

 $^{13}\text{C}\{^1\text{H}\}$  NMR (126 MHz,  $\text{CDCl}_3$ ):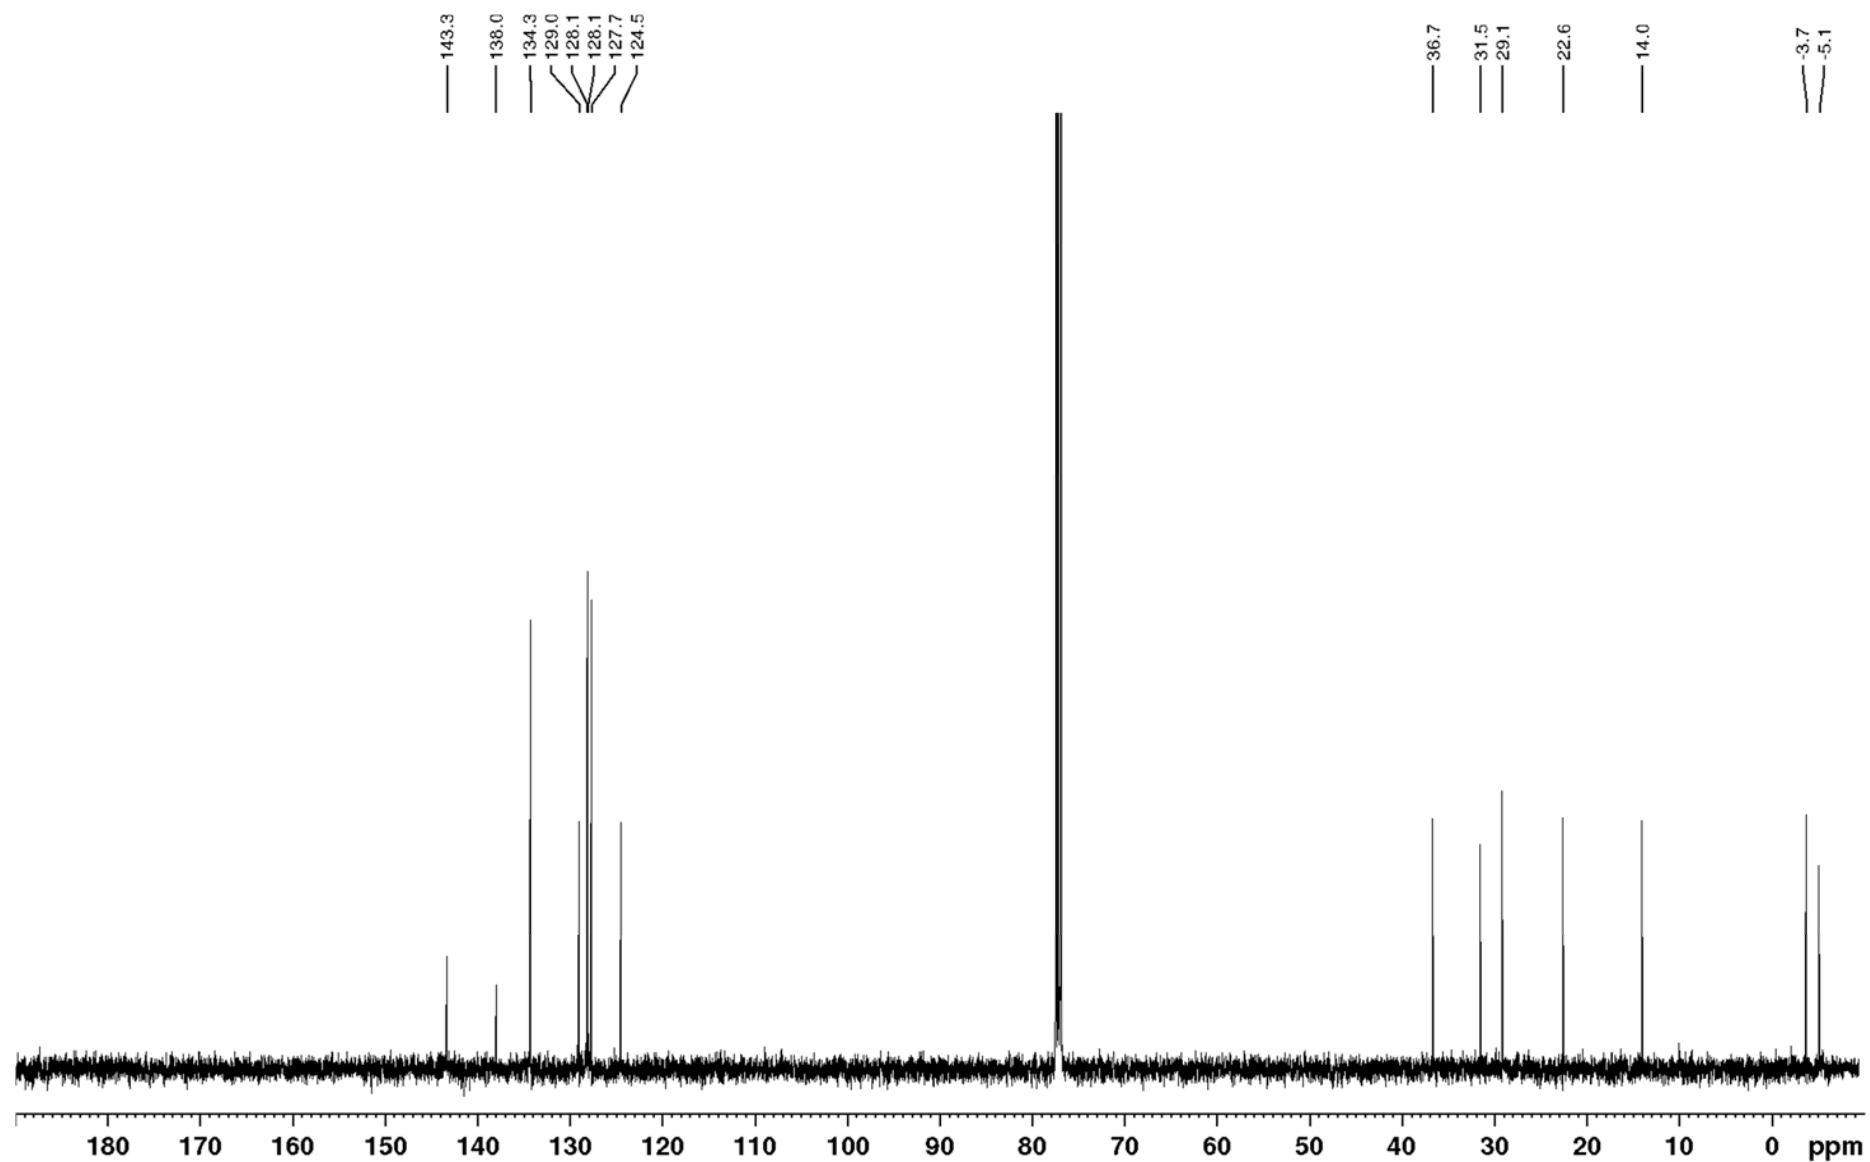

## SUPPORTING INFORMATION

 $^{29}\text{Si}\{^1\text{H}\}$  DEPT NMR (99 MHz,  $\text{CDCl}_3$ ):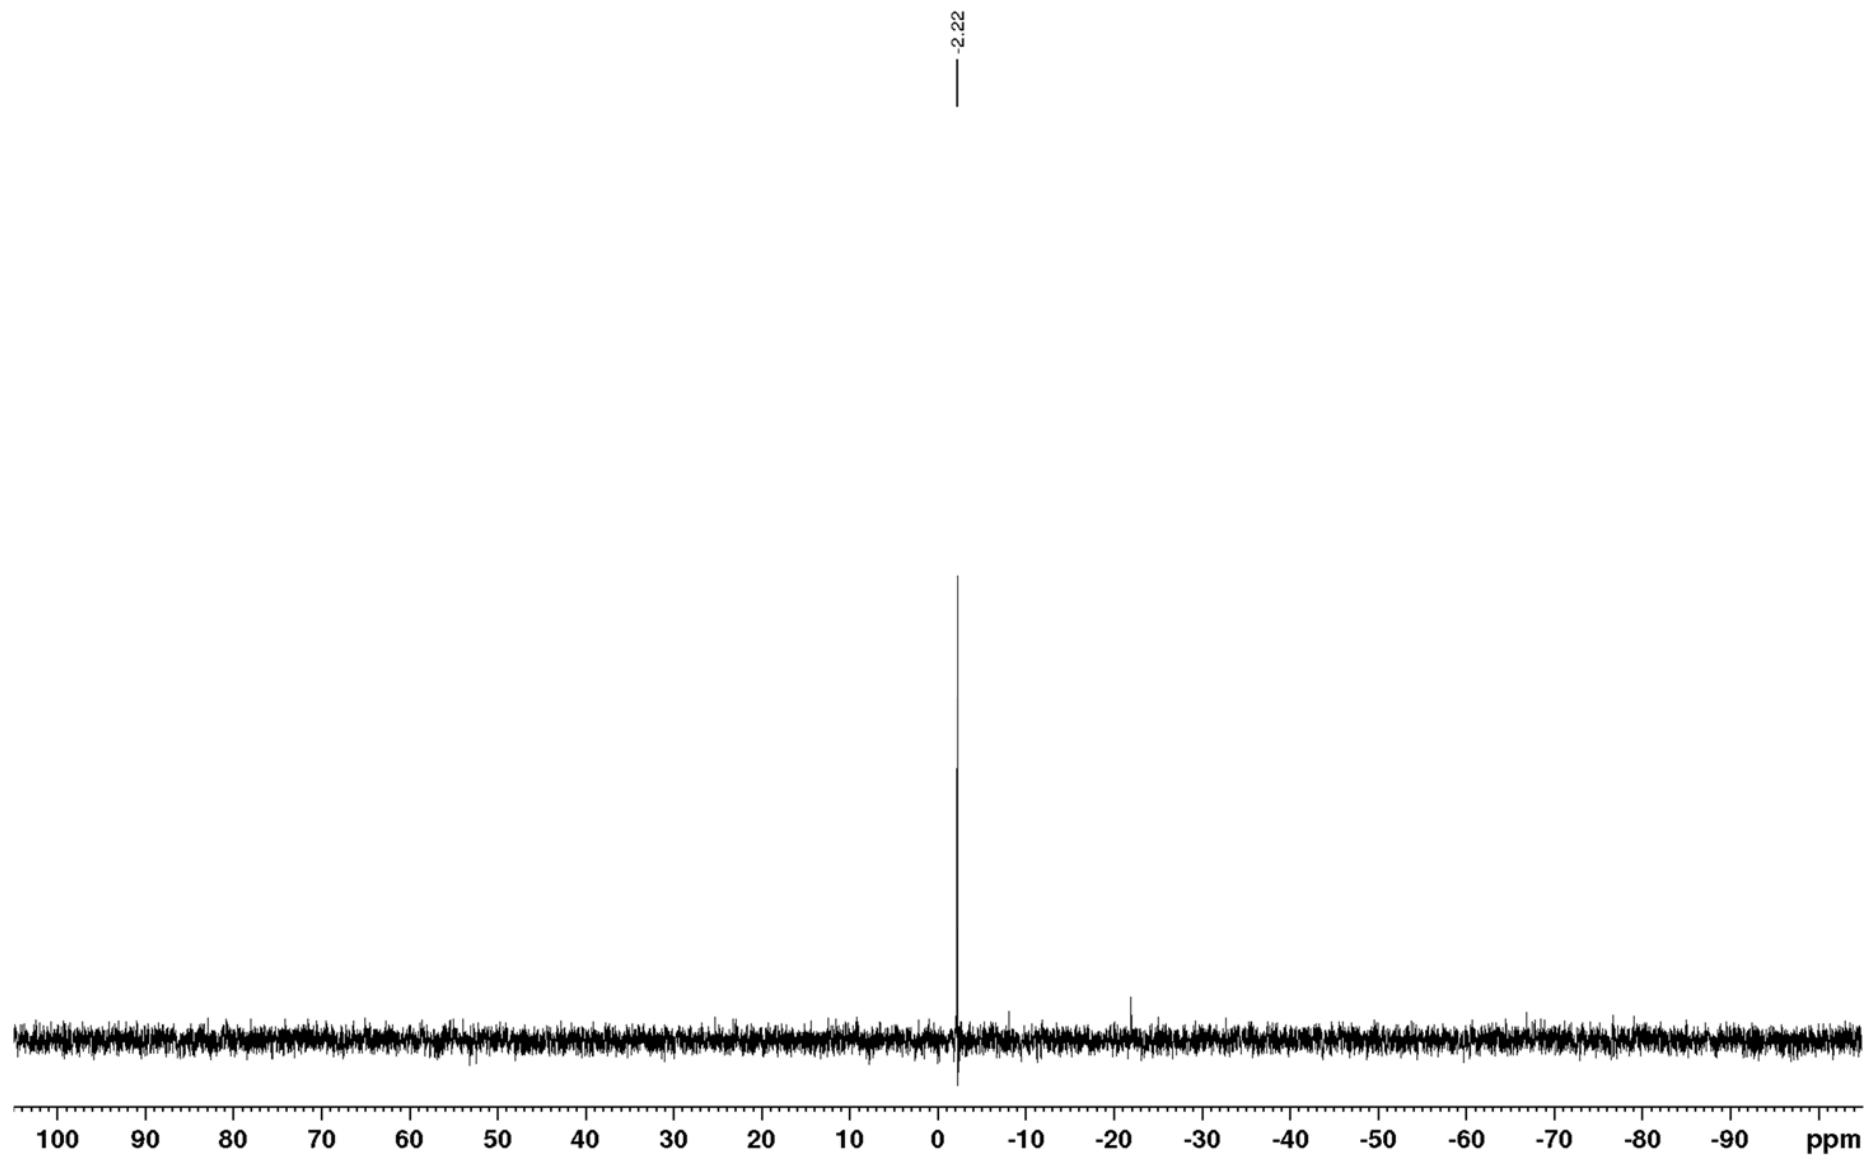

## SUPPORTING INFORMATION

## Dimethyl(phenyl)(1,2,3,4-tetrahydronaphthalen-1-yl)silane (4qa)

$^1\text{H}$  NMR (500 MHz,  
 $\text{CDCl}_3$ ):

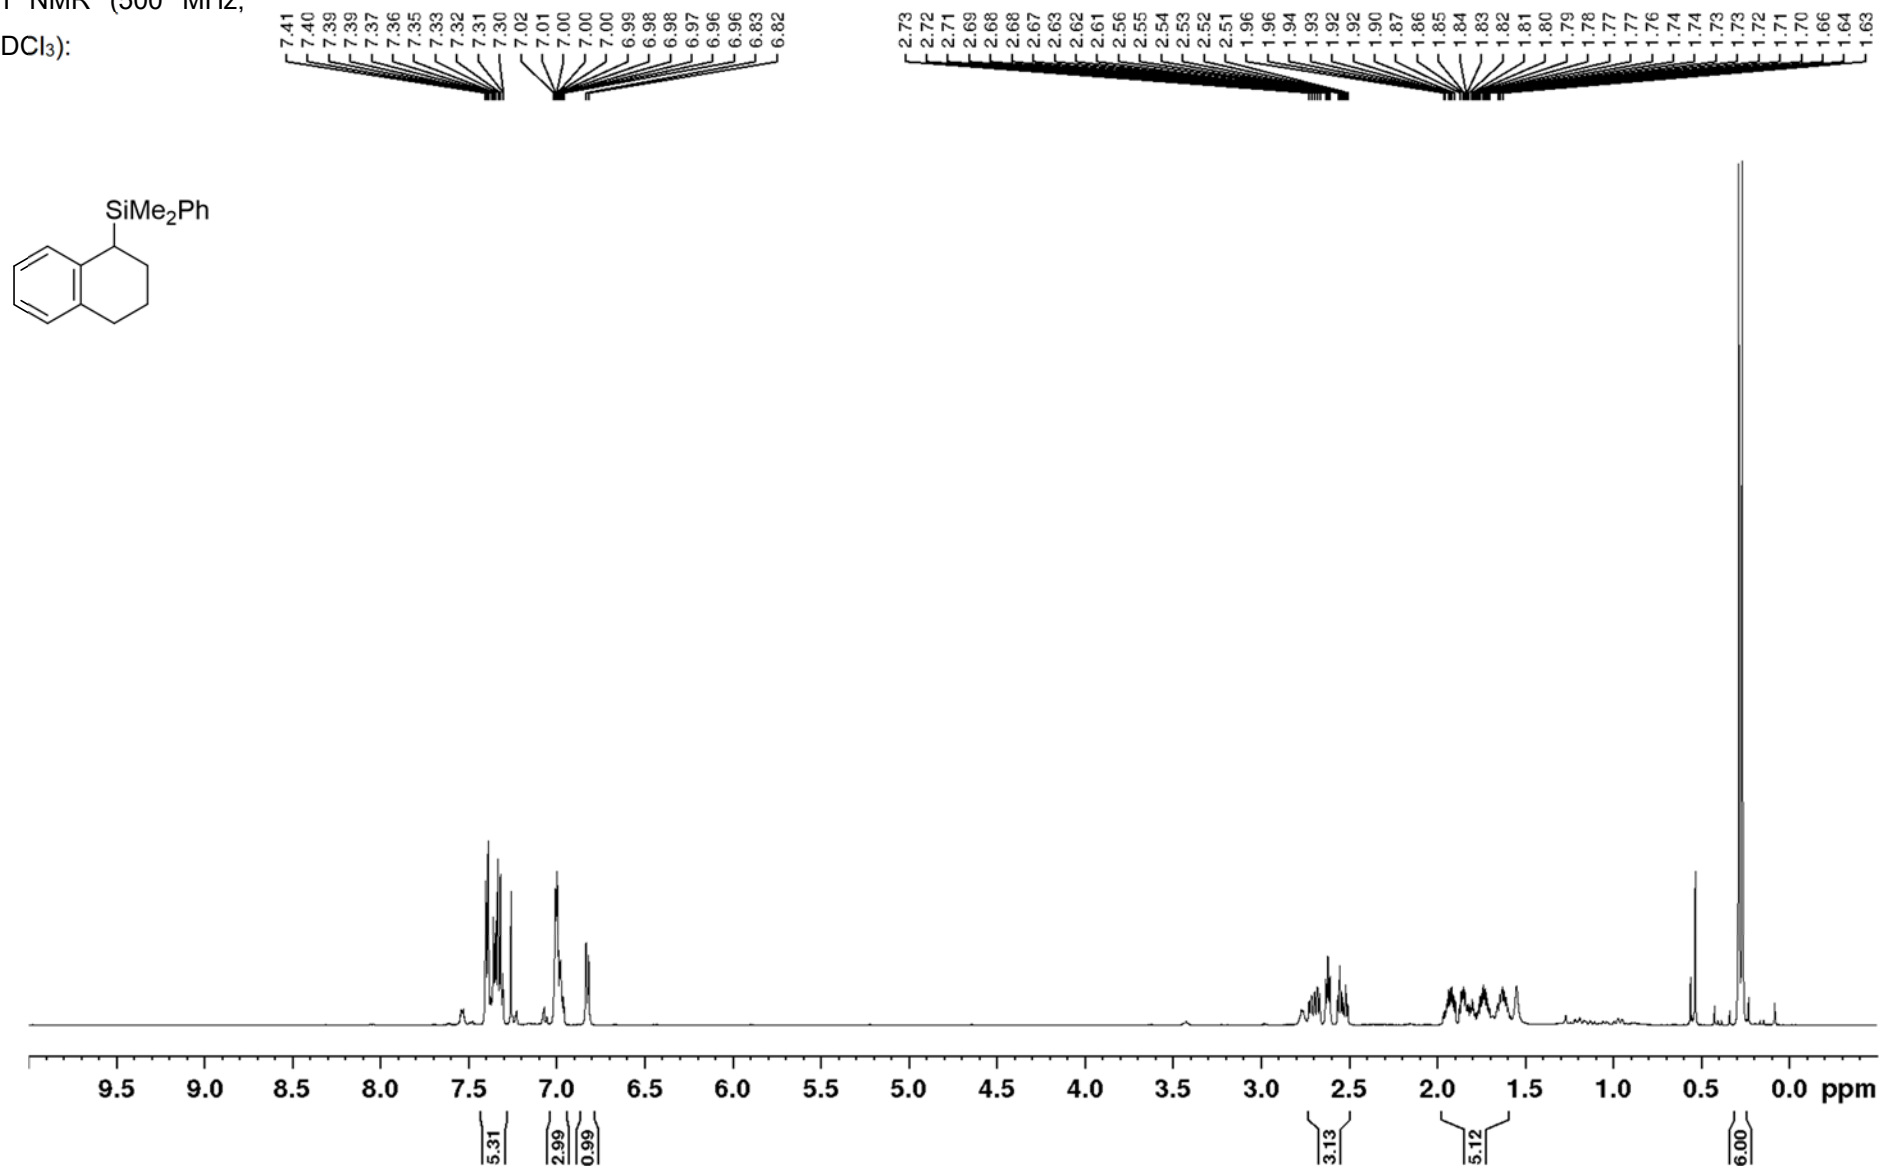

## SUPPORTING INFORMATION

 $^{13}\text{C}\{^1\text{H}\}$  NMR (126 MHz,  $\text{CDCl}_3$ ):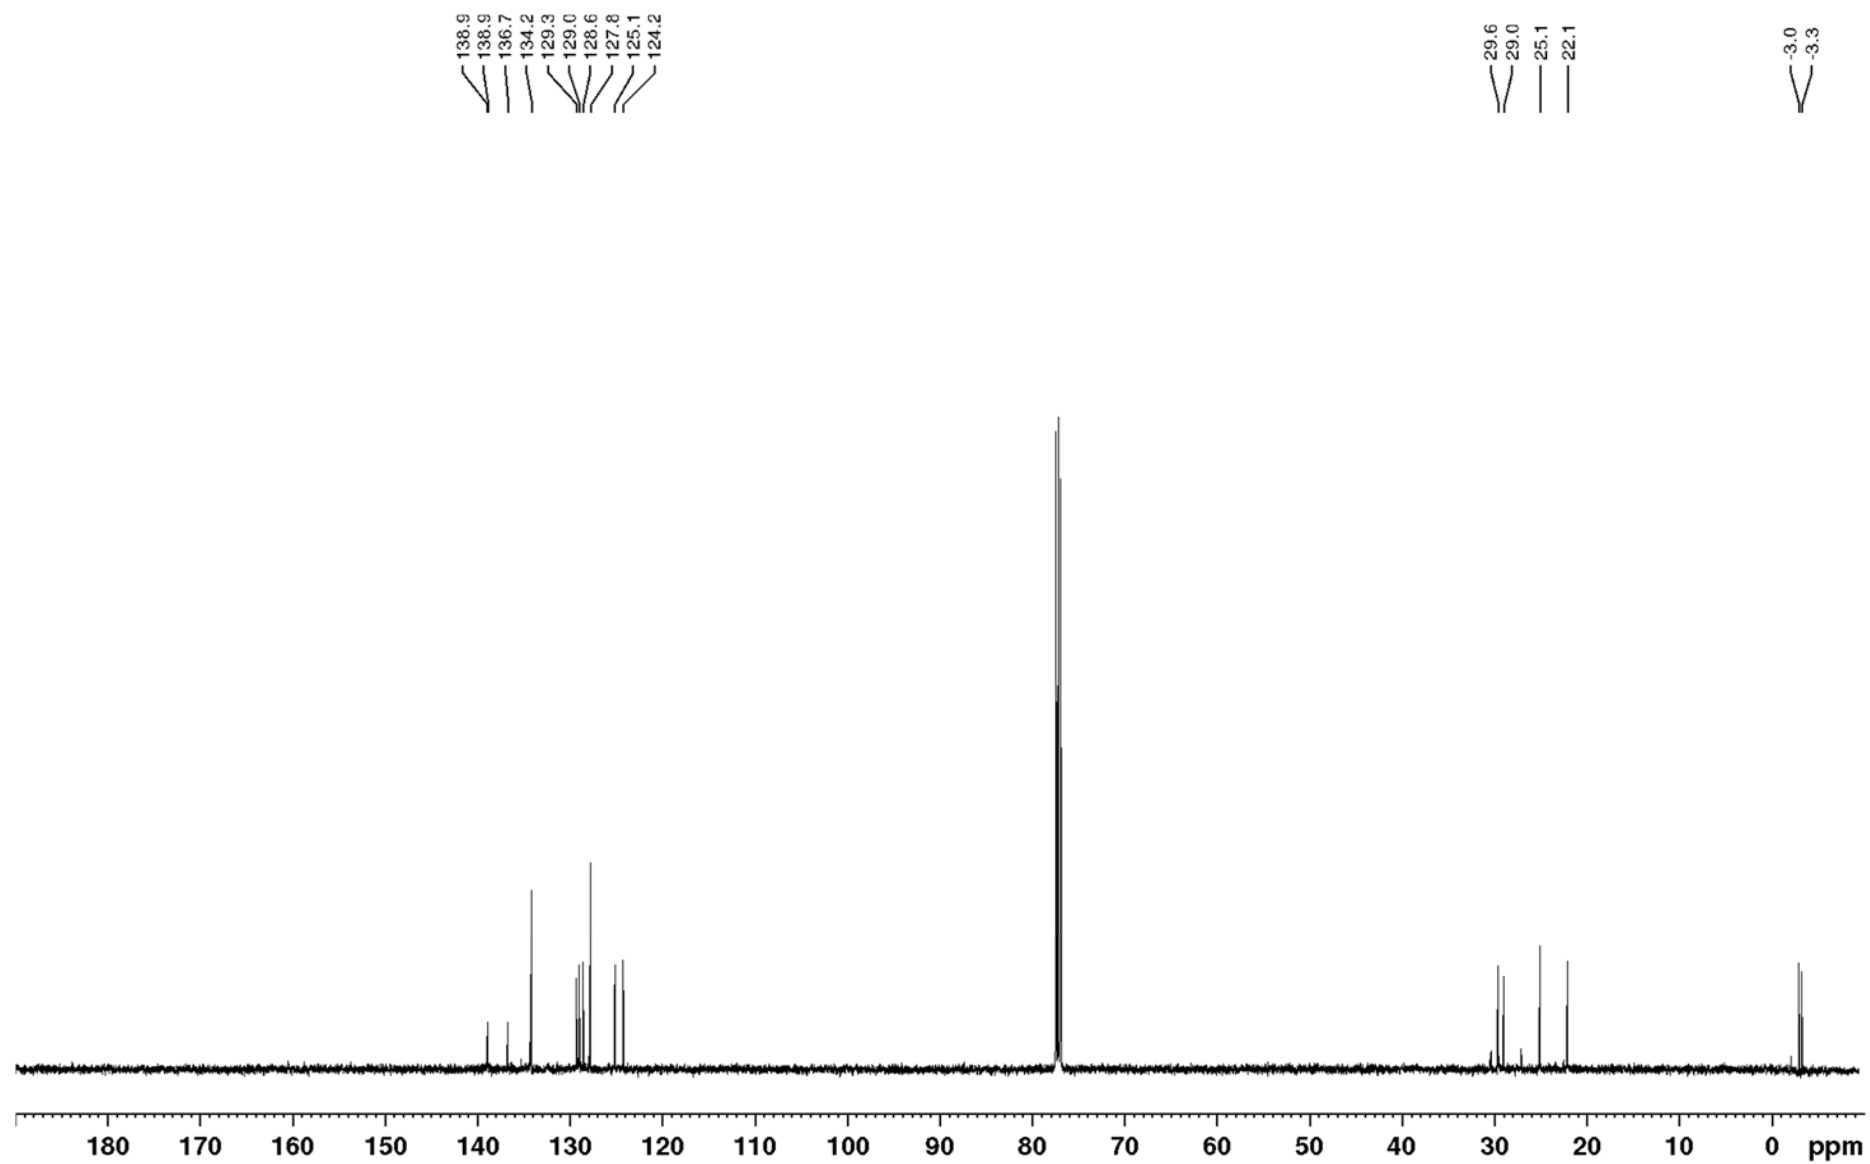

## SUPPORTING INFORMATION

 $^{29}\text{Si}\{^1\text{H}\}$  DEPT NMR (99 MHz,  $\text{CDCl}_3$ ):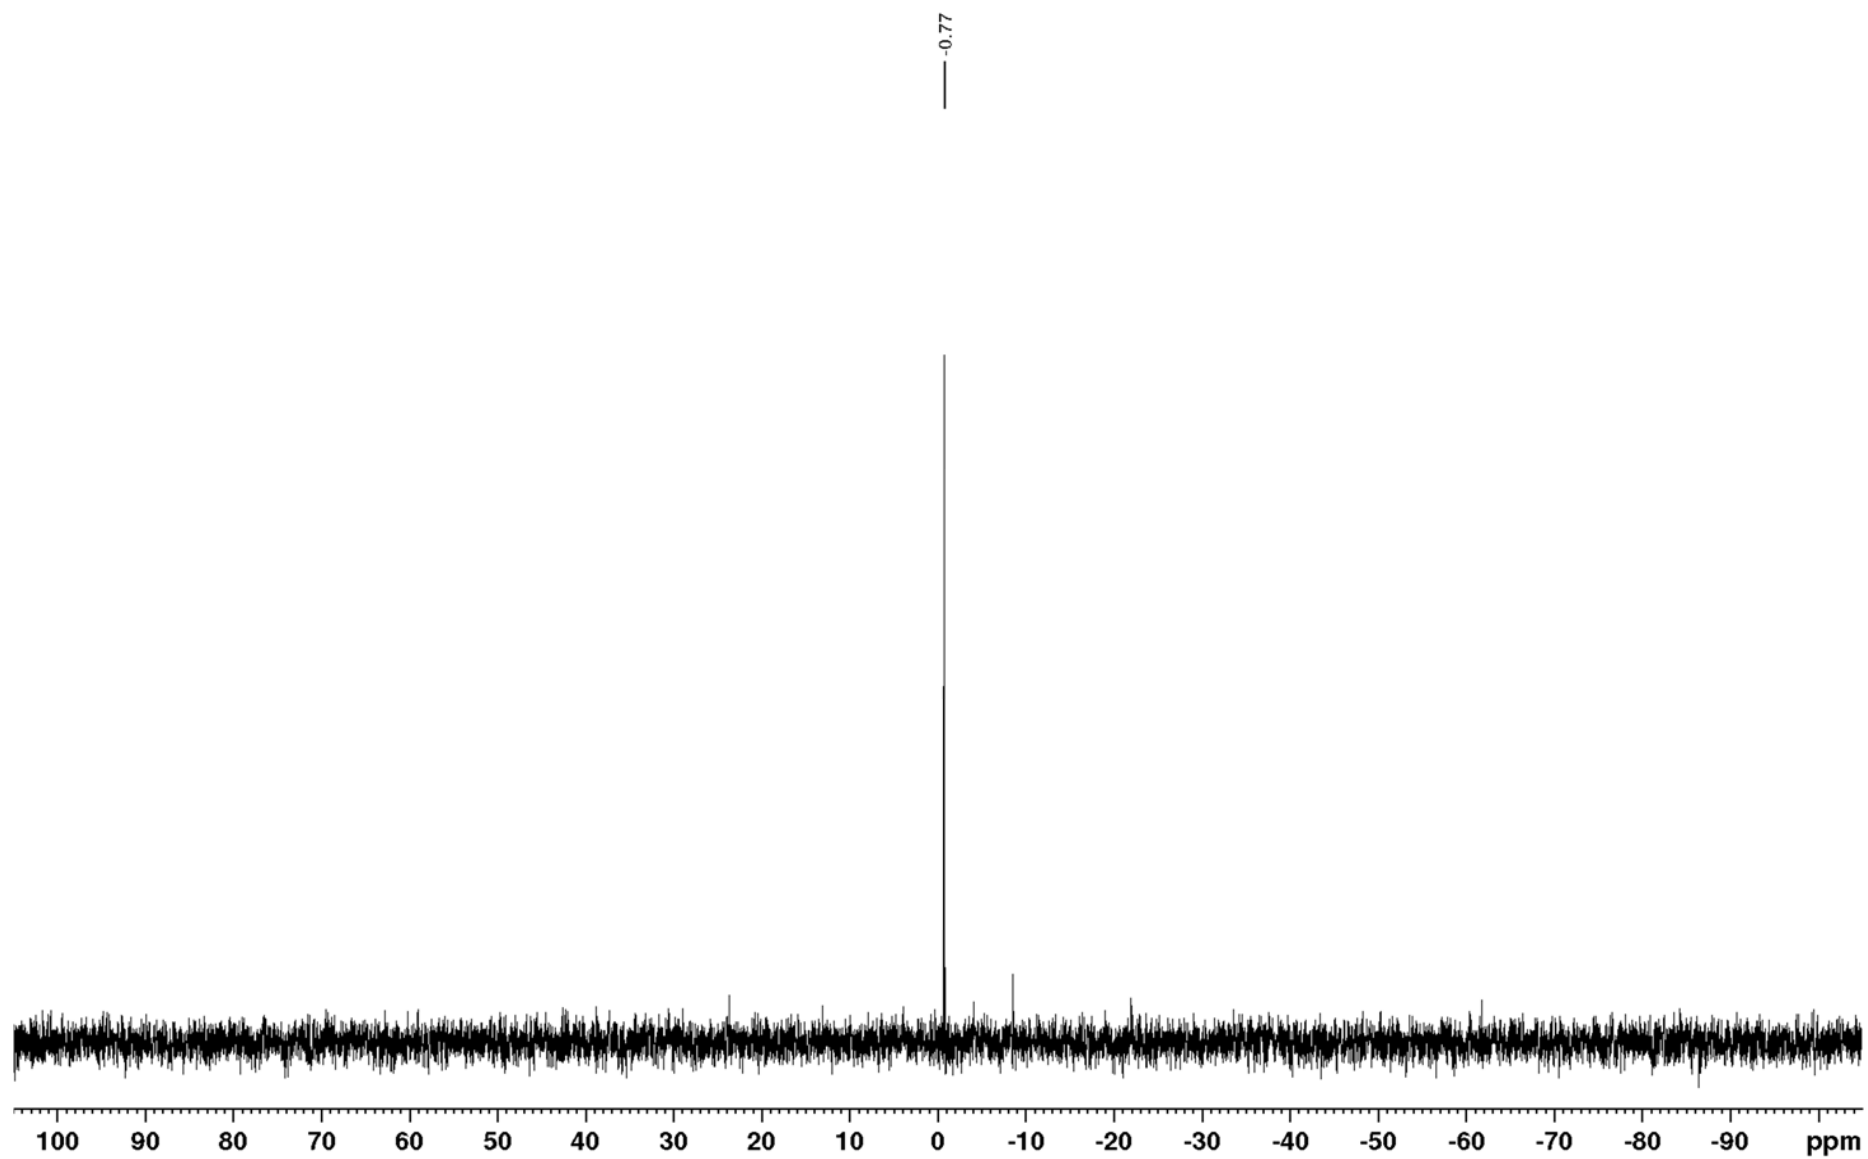

## SUPPORTING INFORMATION

**[Cyclopropyl(phenyl)methyl]dimethyl(phenyl)silane (4ra)**

<sup>1</sup>H NMR (500  
MHz, CDCl<sub>3</sub>):

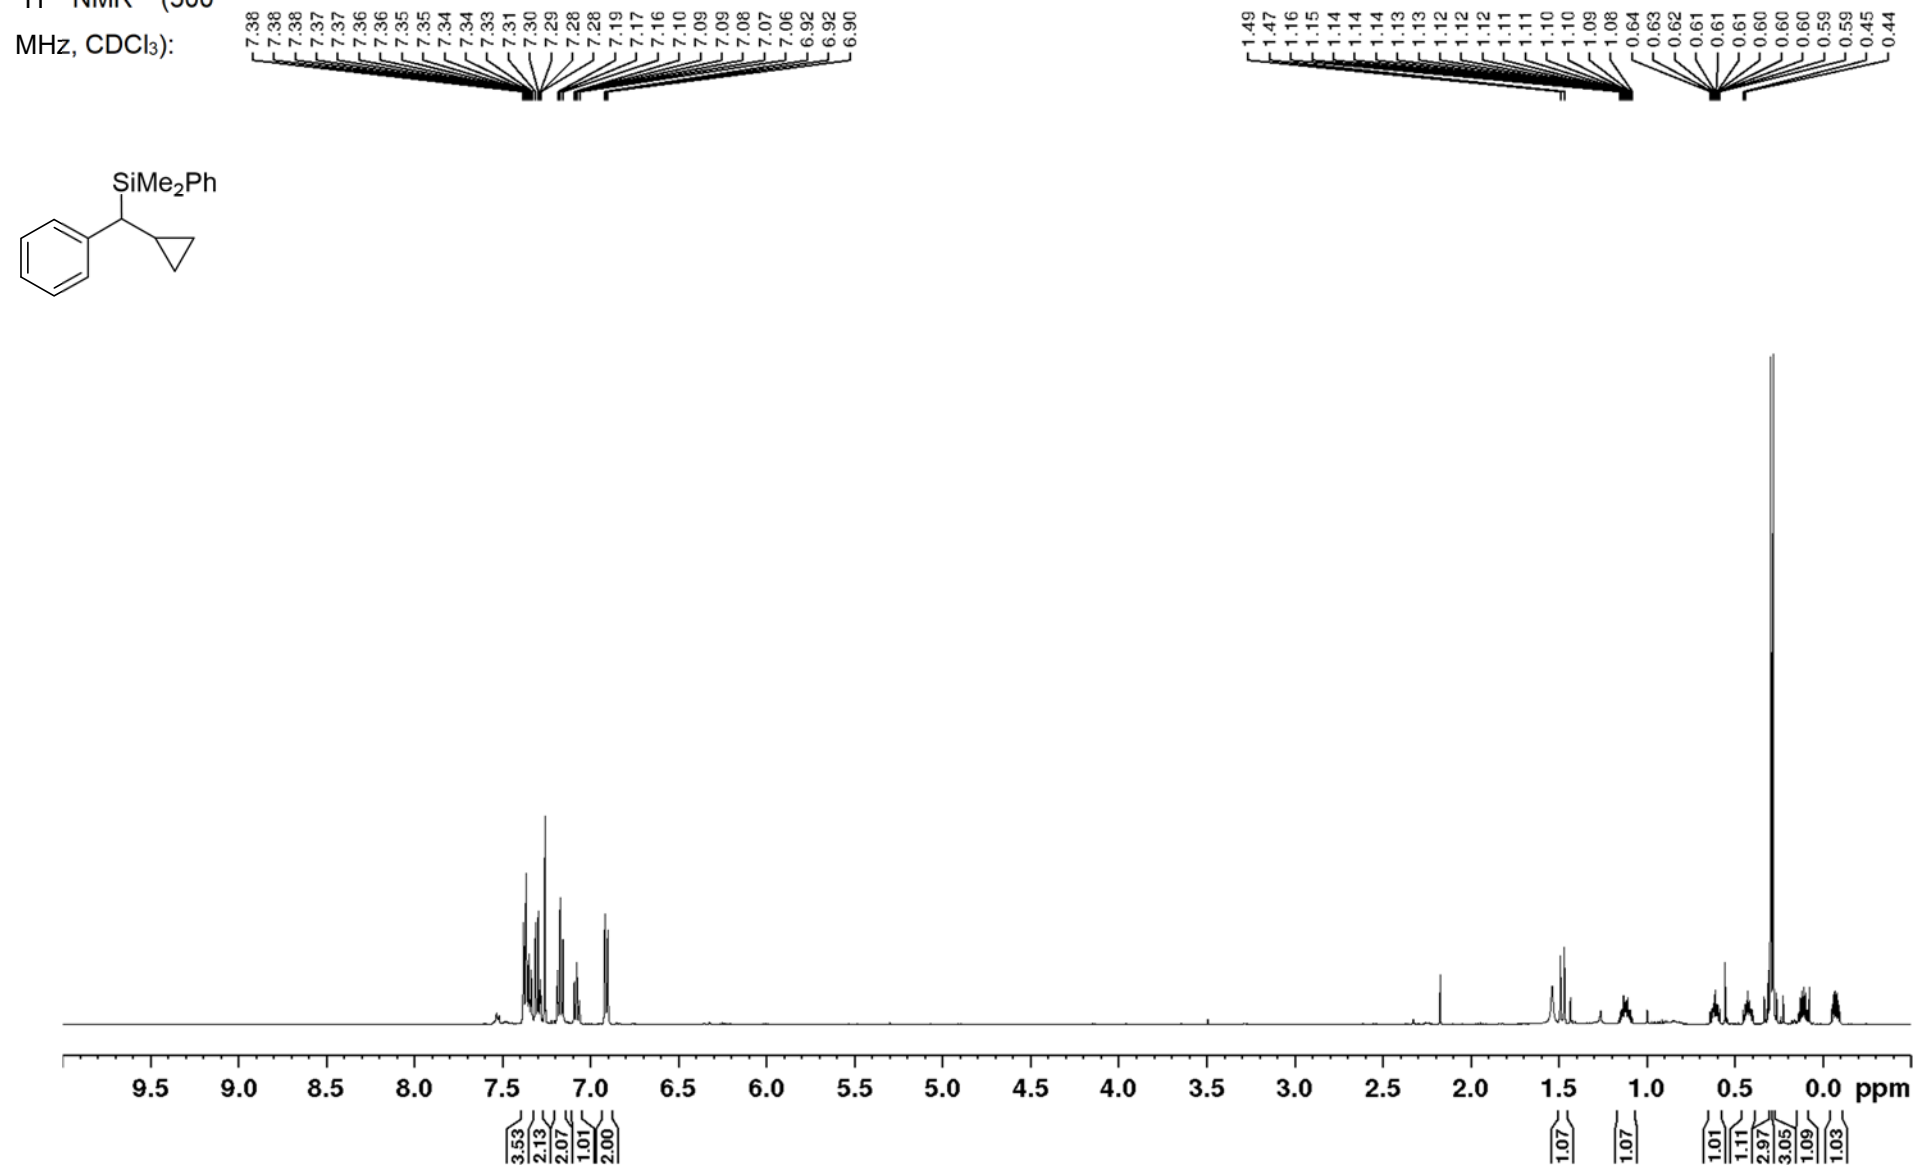

## SUPPORTING INFORMATION

 $^{13}\text{C}\{^1\text{H}\}$  NMR (126 MHz,  $\text{CDCl}_3$ ):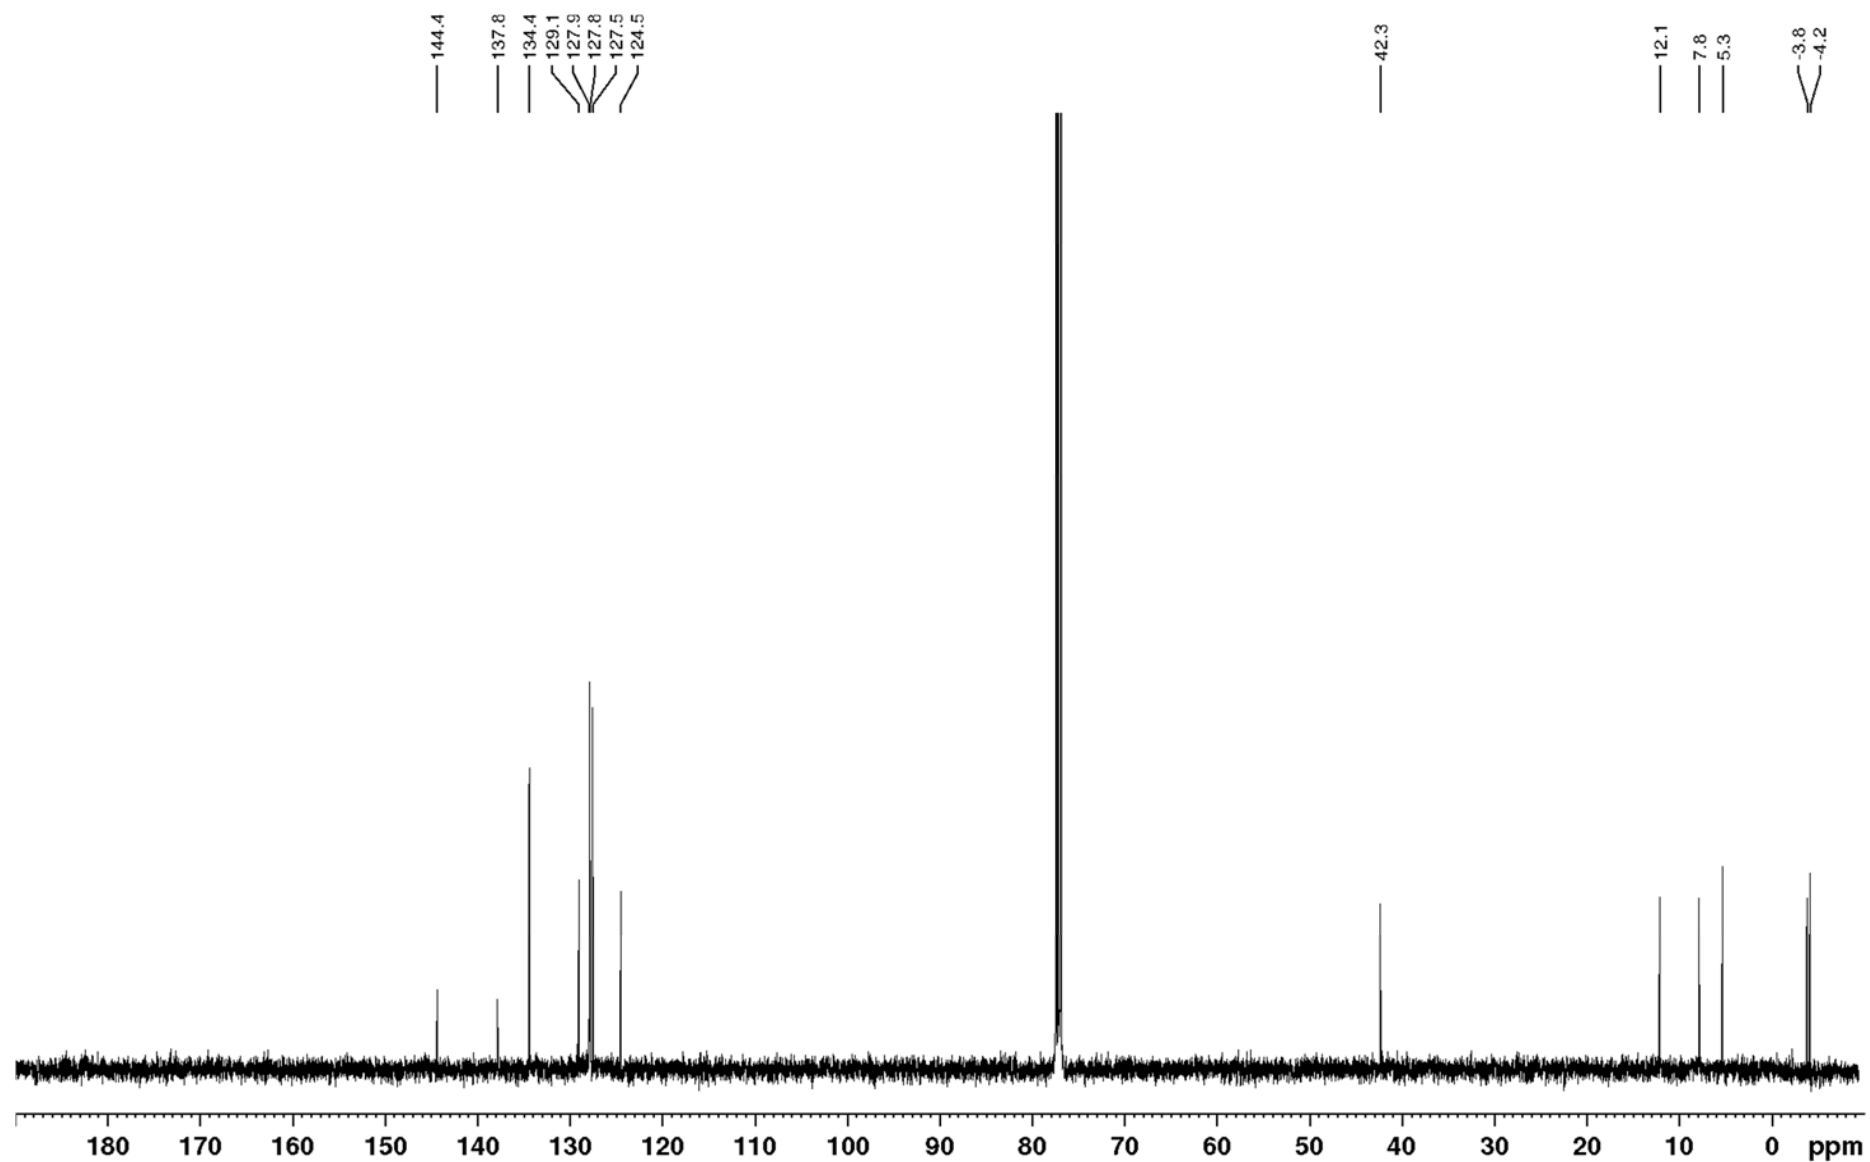



## SUPPORTING INFORMATION

 $^{29}\text{Si}\{^1\text{H}\}$  DEPT NMR (99 MHz,  $\text{CDCl}_3$ ):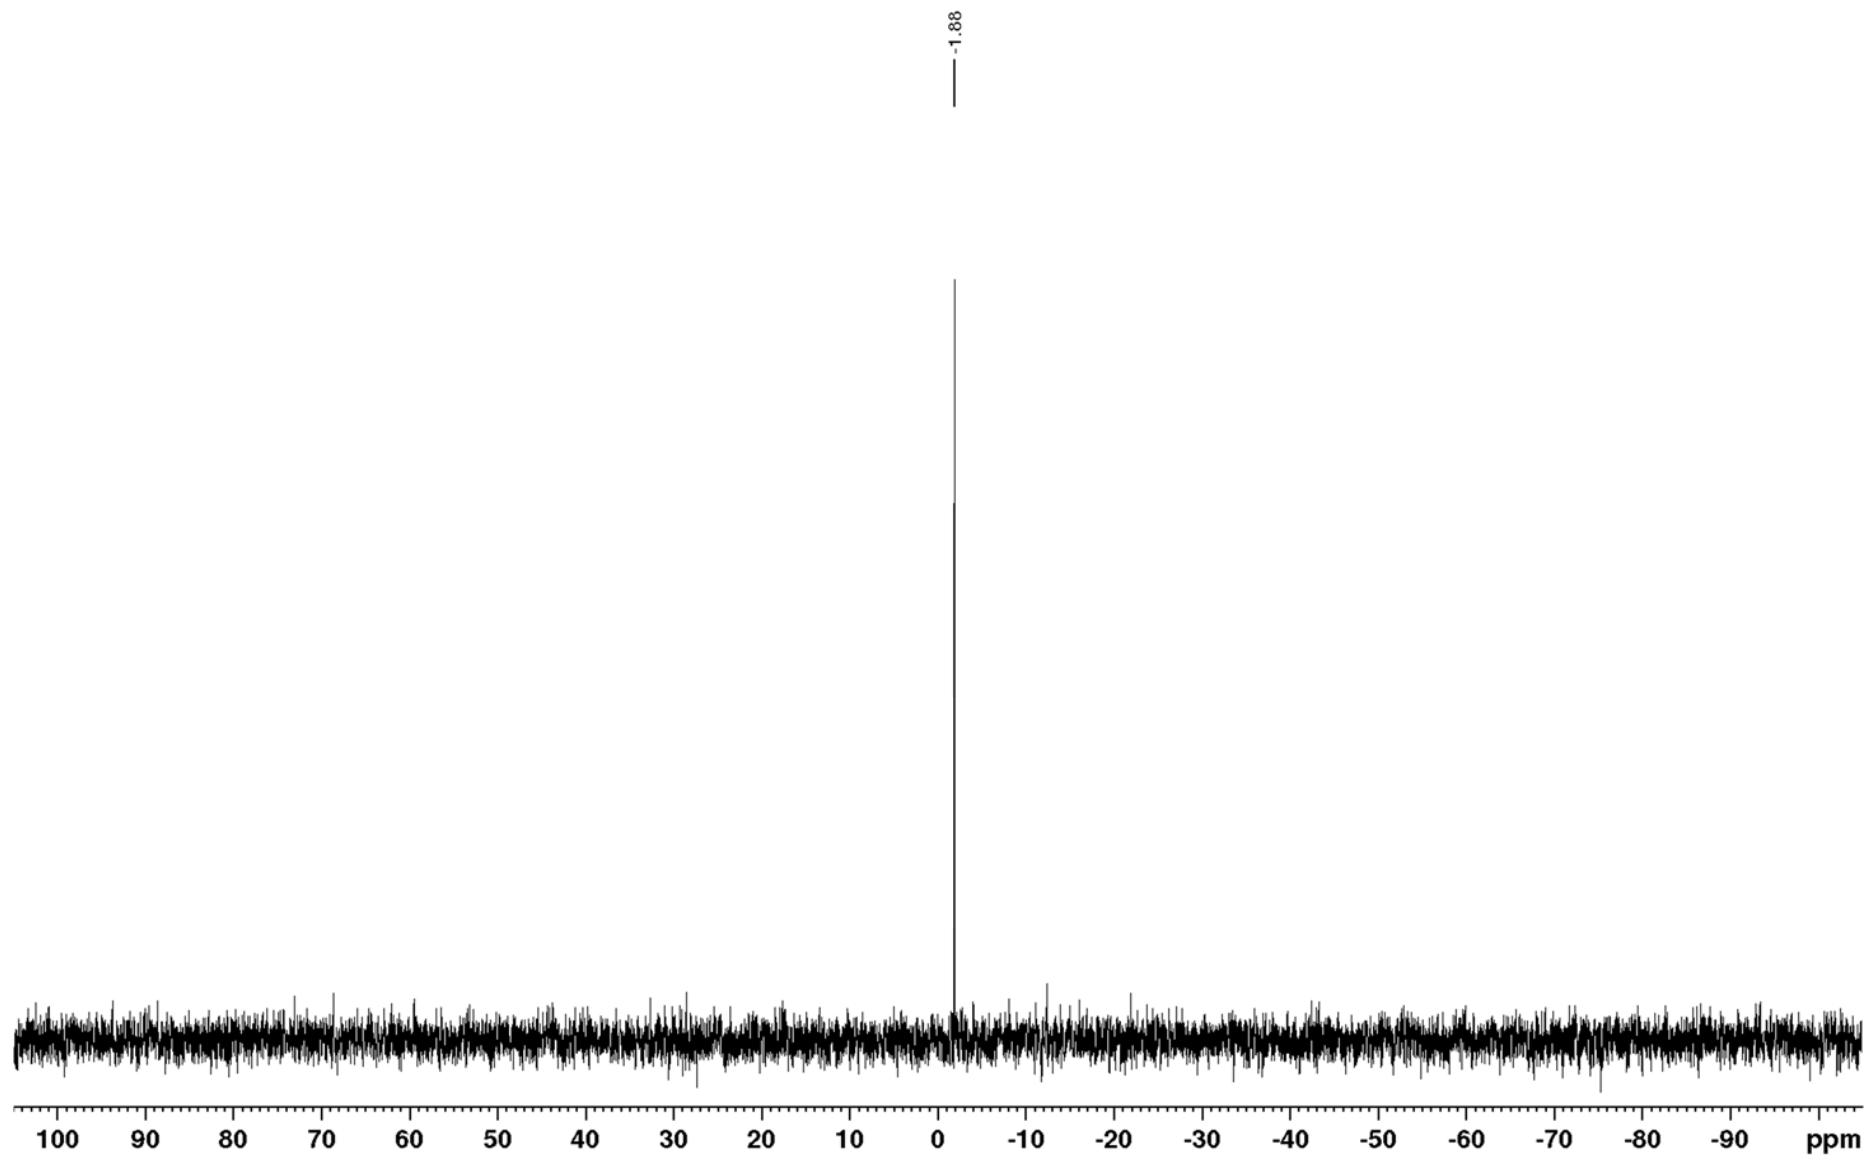

## SUPPORTING INFORMATION

## Benzyldimethyl(phenyl)silane (4ua)

<sup>1</sup>H NMR  
CDCl<sub>3</sub>:7.48  
7.47  
7.46  
7.46  
7.39  
7.39  
7.38  
7.38  
7.37  
7.36  
7.35  
7.34  
7.34  
7.33  
7.33  
7.20  
7.16  
7.17  
7.17  
7.09  
7.09  
7.07  
7.06  
7.06  
6.95  
6.95  
6.94  
6.94

2.31

0.26

(500 MHz,

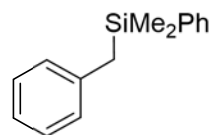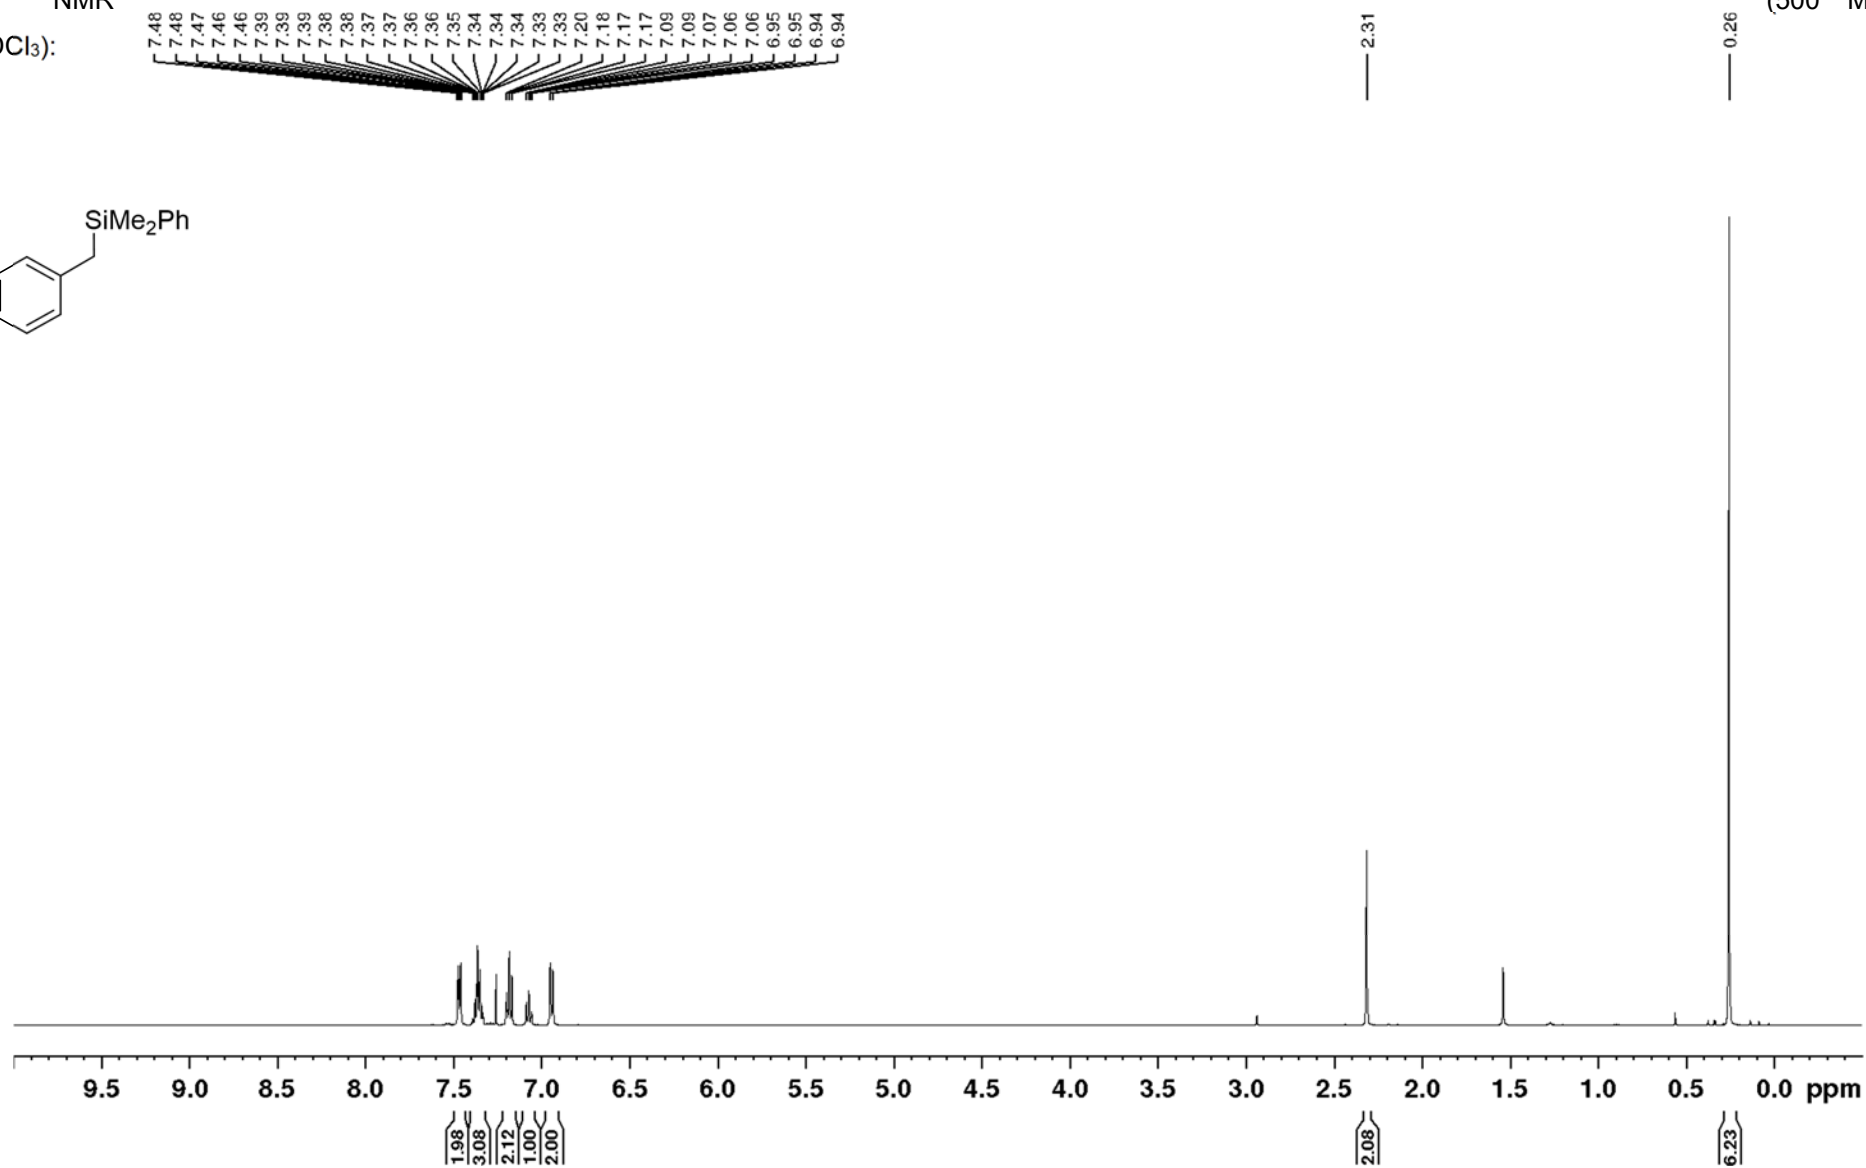

## SUPPORTING INFORMATION

 $^{13}\text{C}\{^1\text{H}\}$  NMR (126 MHz,  $\text{CDCl}_3$ ):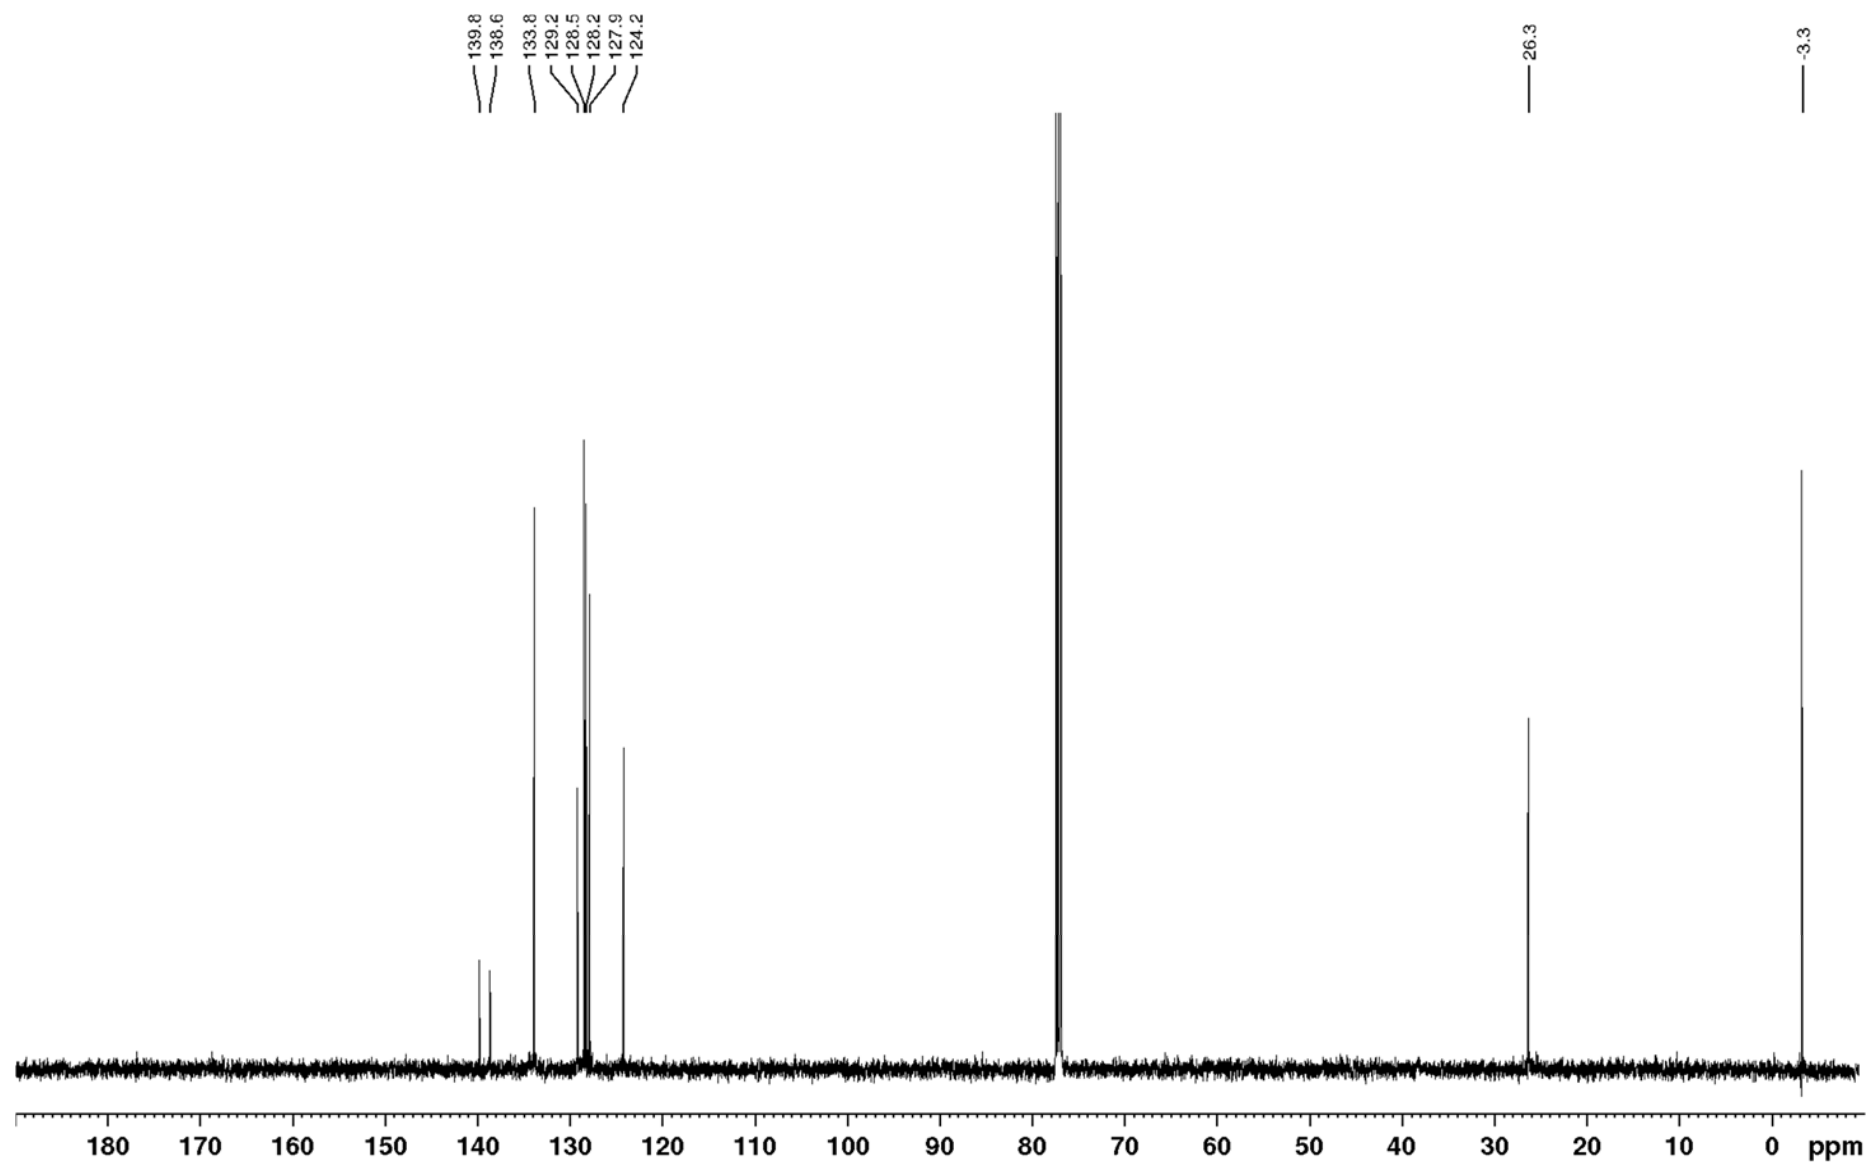

## SUPPORTING INFORMATION

$^{29}\text{Si}\{^1\text{H}\}$  DEPT NMR (99 MHz,  $\text{CDCl}_3$ ):

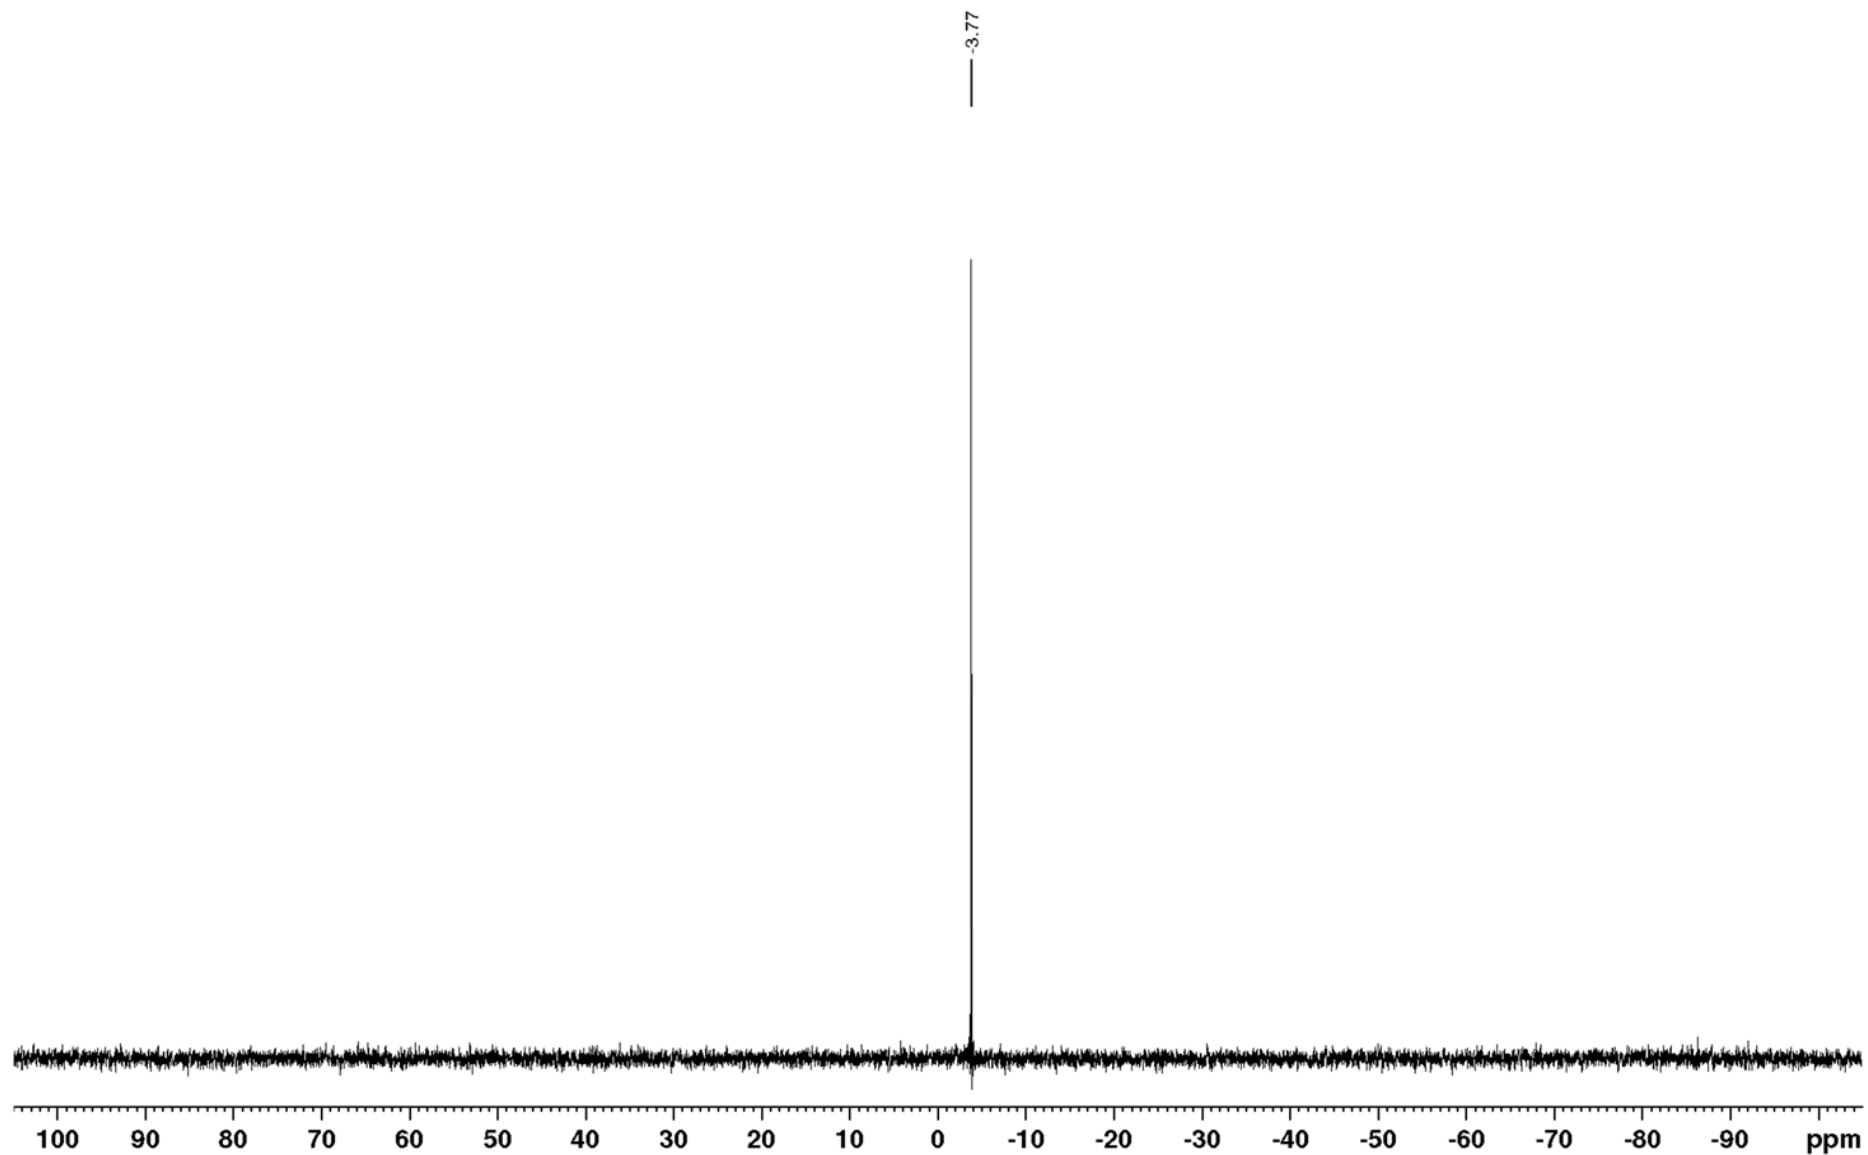

## SUPPORTING INFORMATION

## Benzhydryldimethyl(phenyl)silane (4wa)

 $^1\text{H}$  NMR $\text{CDCl}_3$ :

7.36  
7.36  
7.35  
7.35  
7.34  
7.34  
7.34  
7.34  
7.33  
7.33  
7.32  
7.32  
7.29  
7.29  
7.28  
7.27  
7.27  
7.26  
7.22  
7.22  
7.21  
7.20  
7.20  
7.19  
7.19  
7.18  
7.14  
7.14  
7.13  
7.12  
7.12  
7.12  
7.11  
7.10  
7.10

3.74

0.30

(500 MHz,

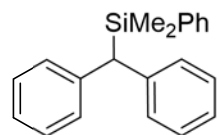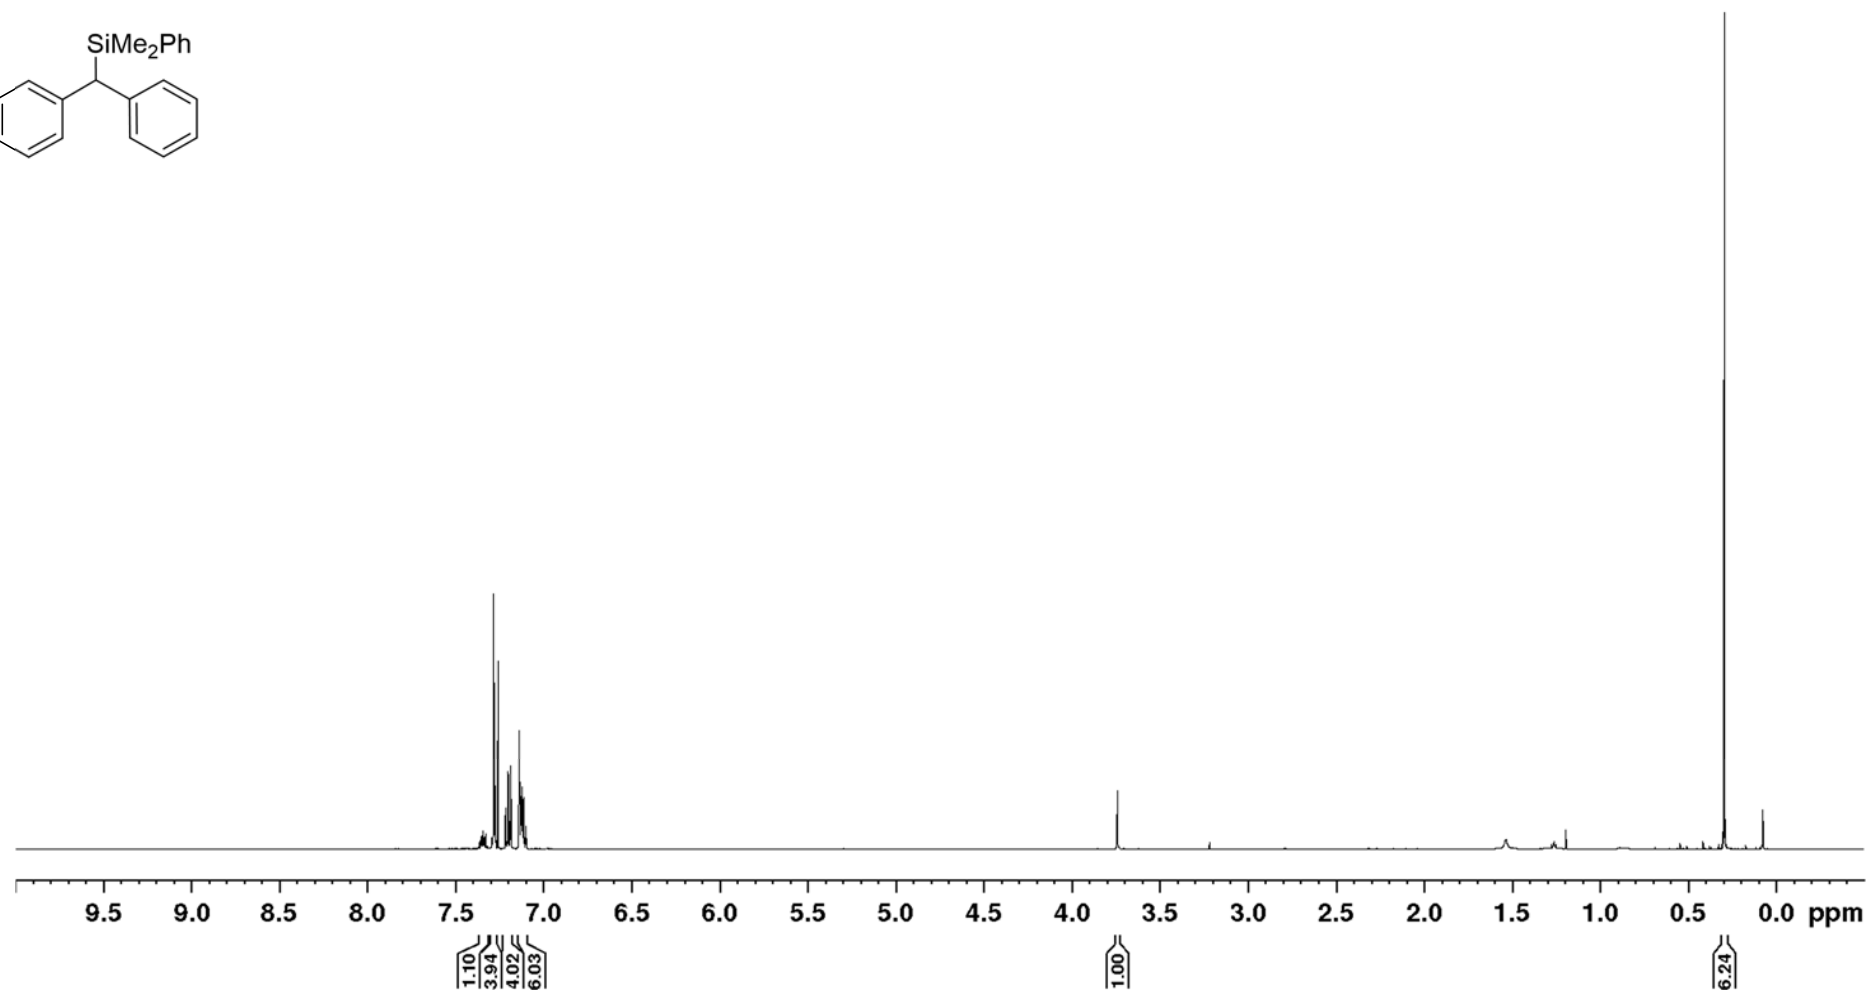

## SUPPORTING INFORMATION

 $^{13}\text{C}\{^1\text{H}\}$  NMR (126 MHz,  $\text{CDCl}_3$ ):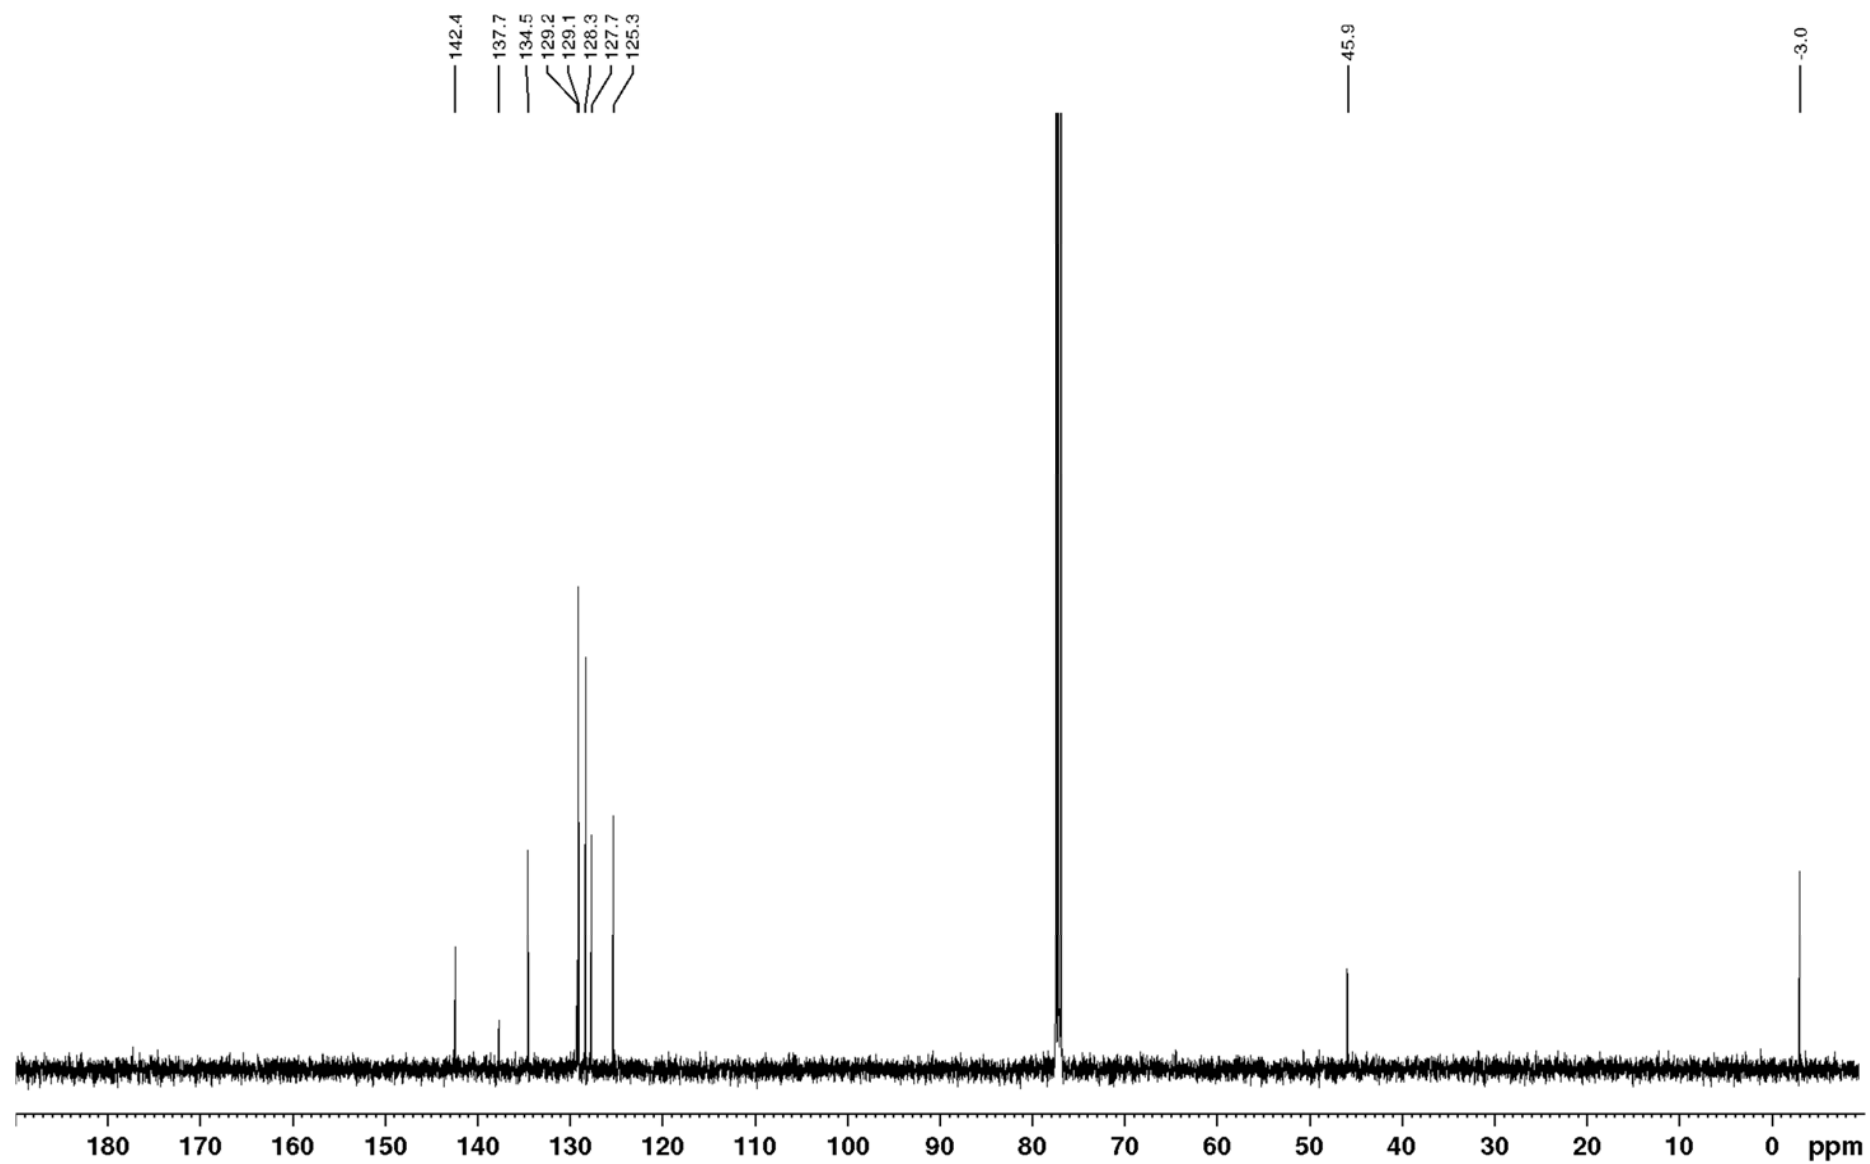

## SUPPORTING INFORMATION

 $^{29}\text{Si}\{^1\text{H}\}$  DEPT NMR (99 MHz,  $\text{CDCl}_3$ ):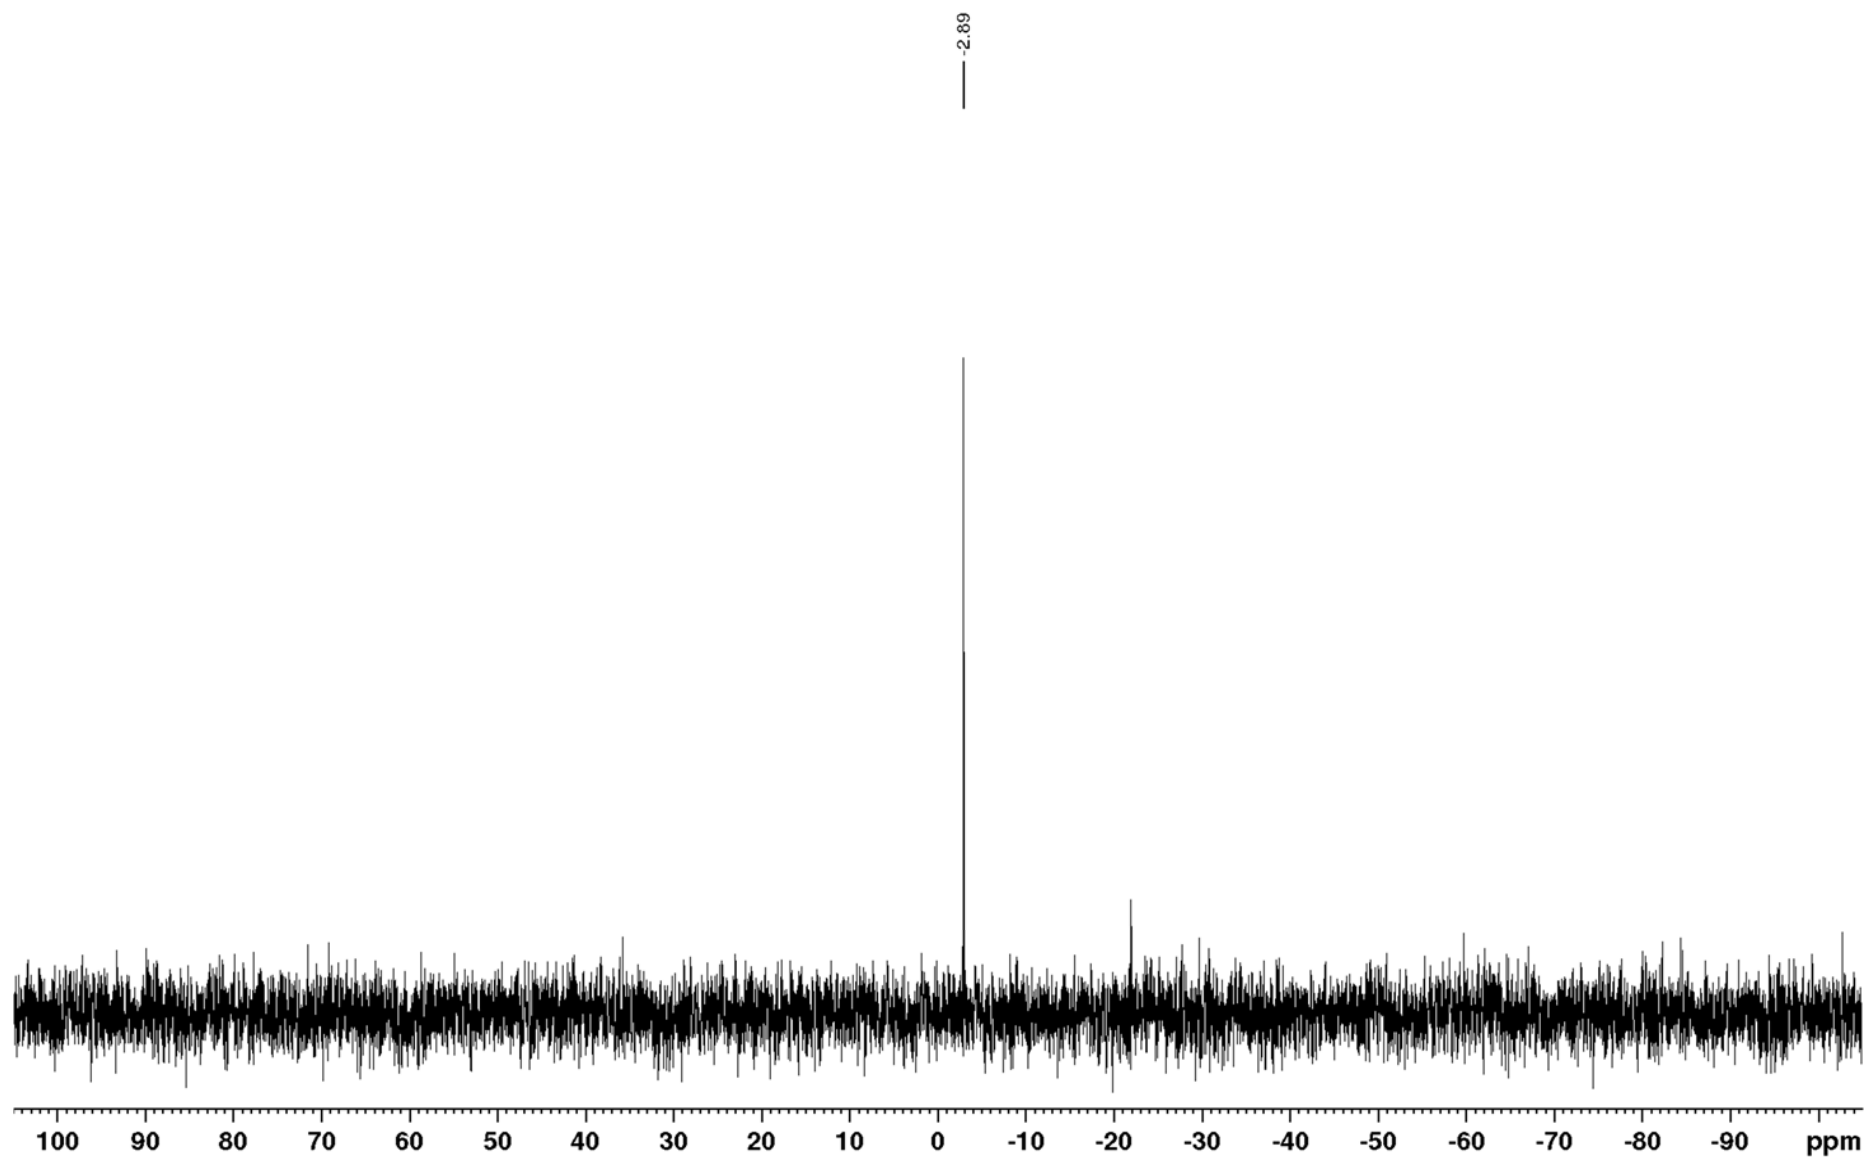

## SUPPORTING INFORMATION

## Cinnamyl dimethyl(phenyl)silane (6)

 $^1\text{H}$  NMR (500 MHz, $\text{CDCl}_3$ ):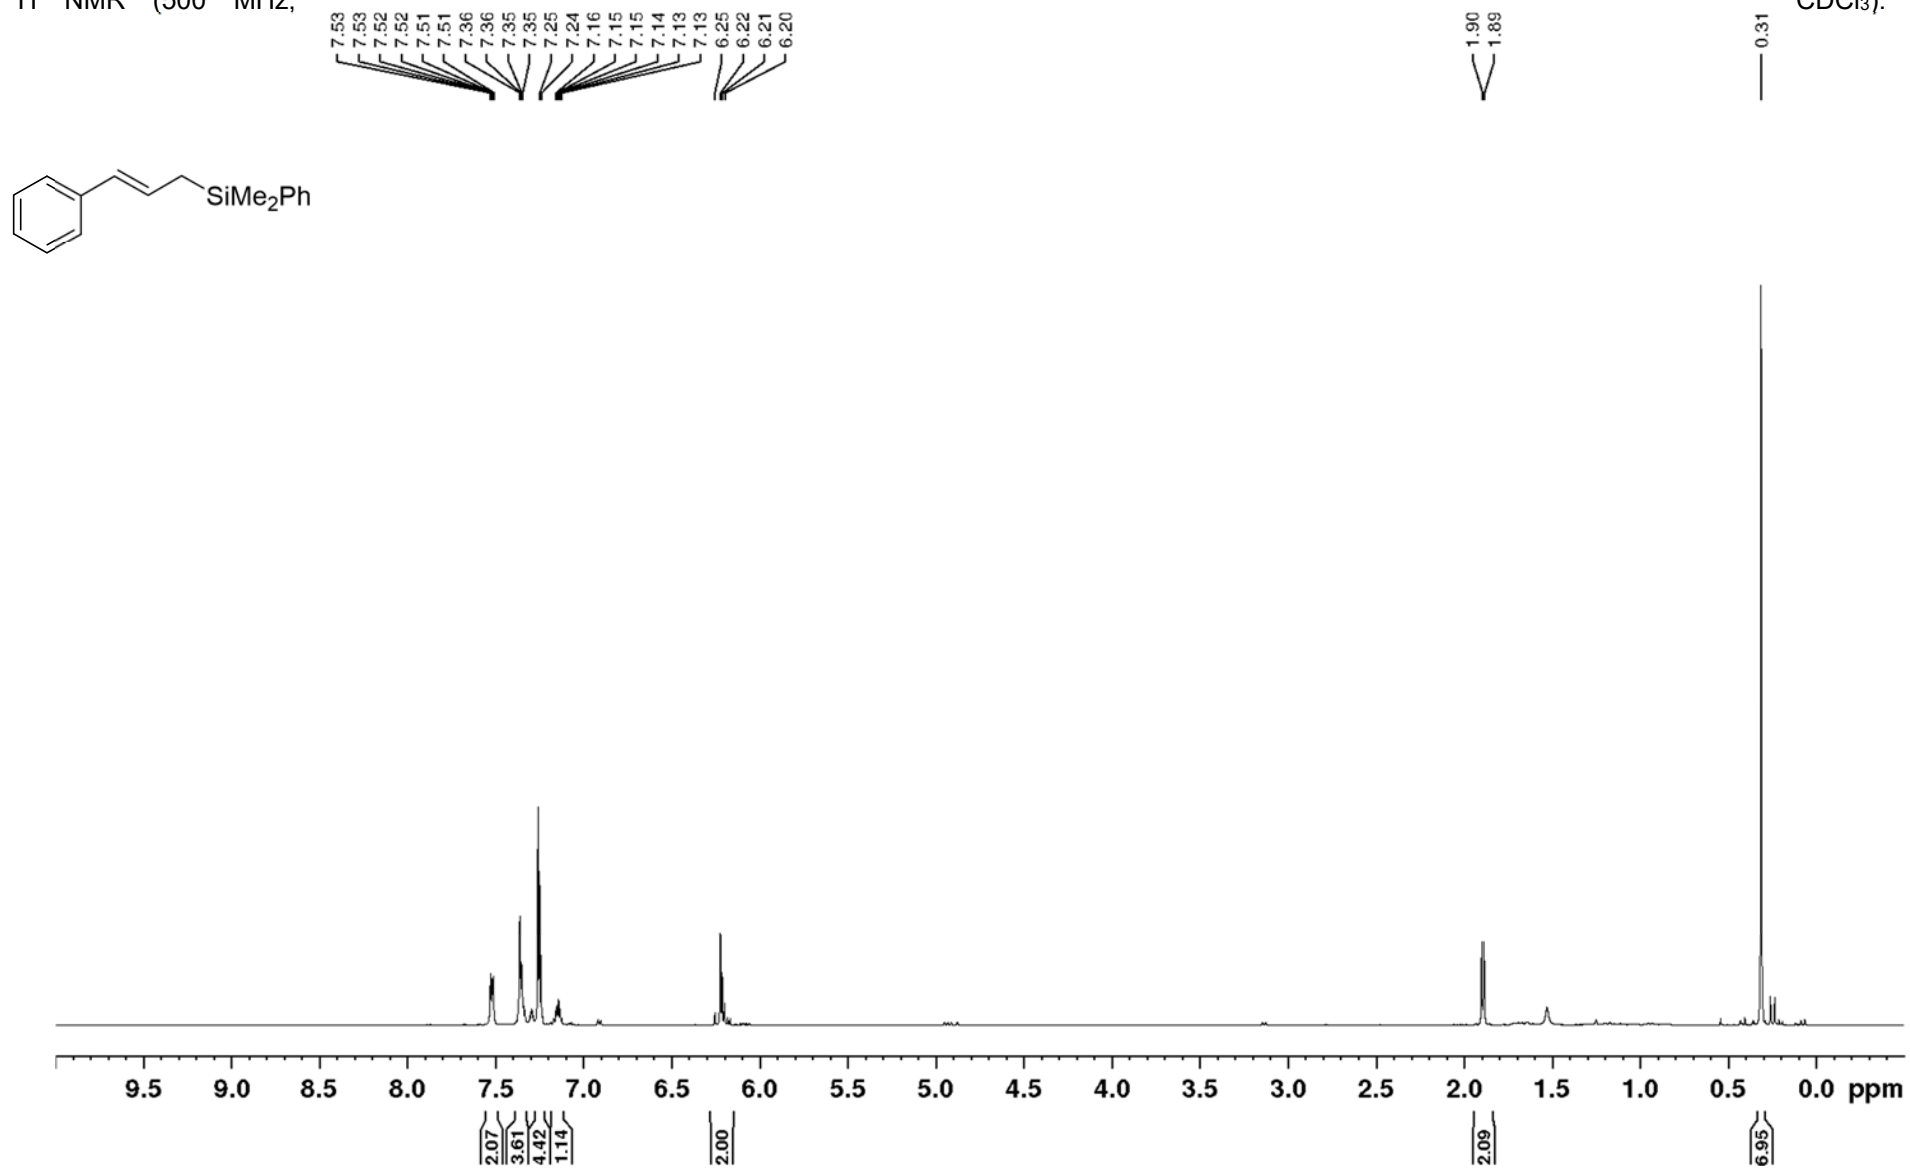



## SUPPORTING INFORMATION

 $^{13}\text{C}\{^1\text{H}\}$  NMR (126 MHz,  $\text{CDCl}_3$ ):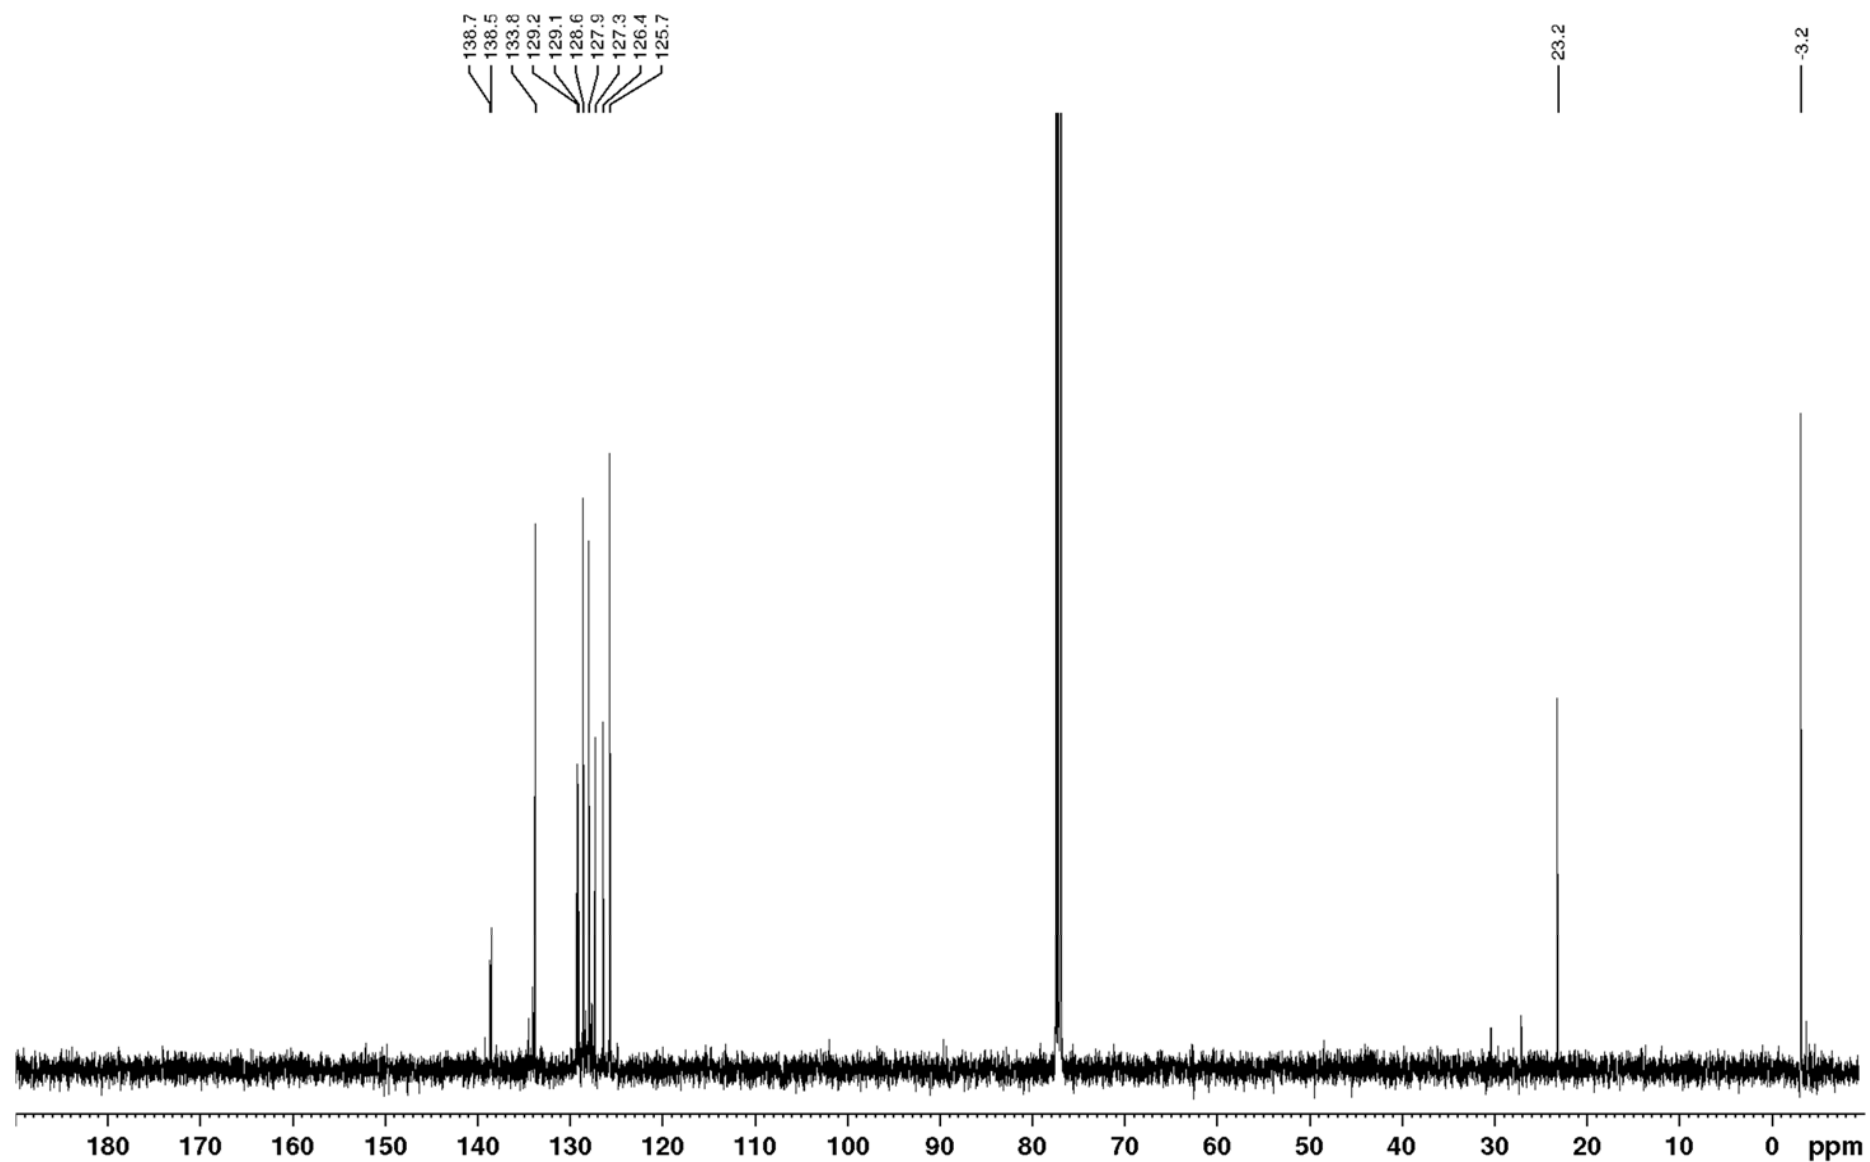

## SUPPORTING INFORMATION

 $^{29}\text{Si}\{^1\text{H}\}$  DEPT NMR (99 MHz,  $\text{CDCl}_3$ ):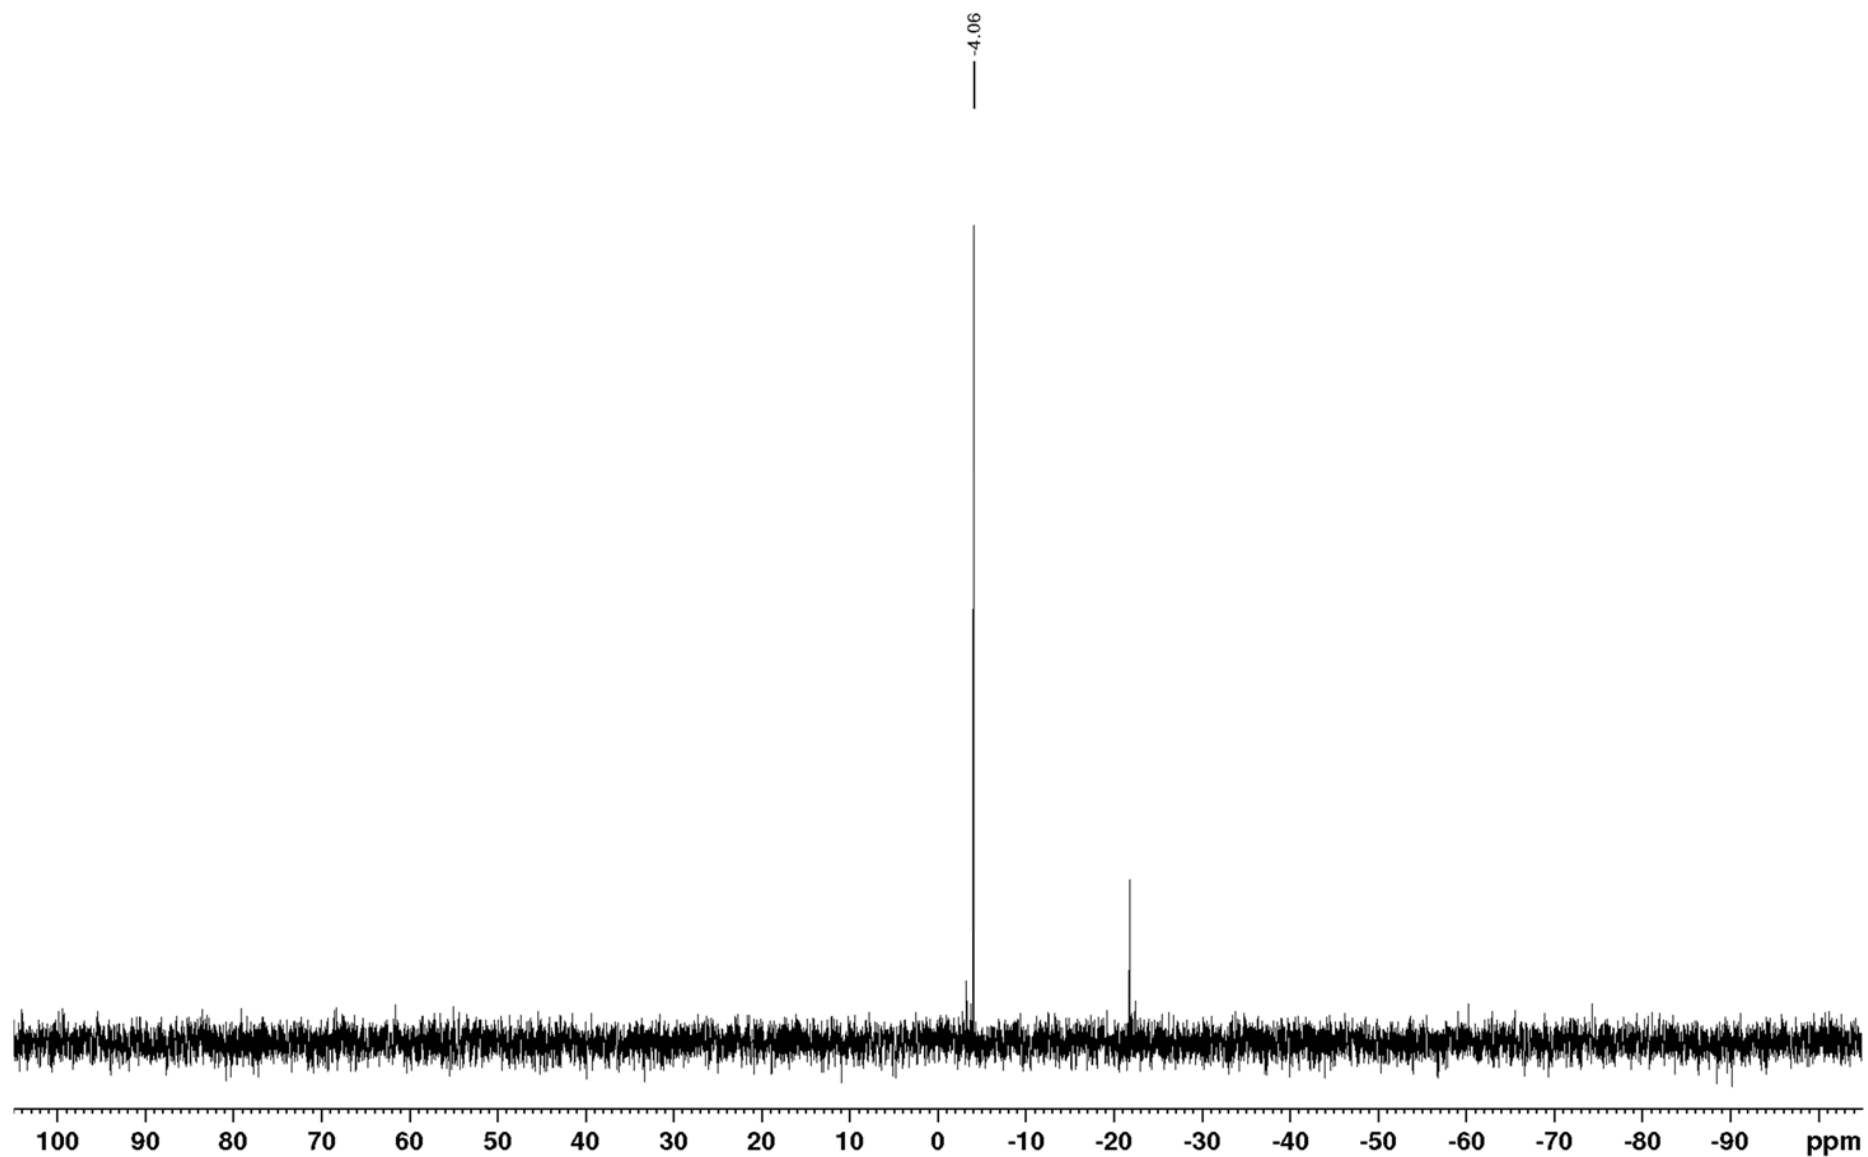

## SUPPORTING INFORMATION

## Dimethyl(3-methyl-1-phenylbuta-1,2-dien-1-yl)(phenyl)silane (8)

 $^1\text{H}$  NMR (500MHz,  $\text{CDCl}_3$ ):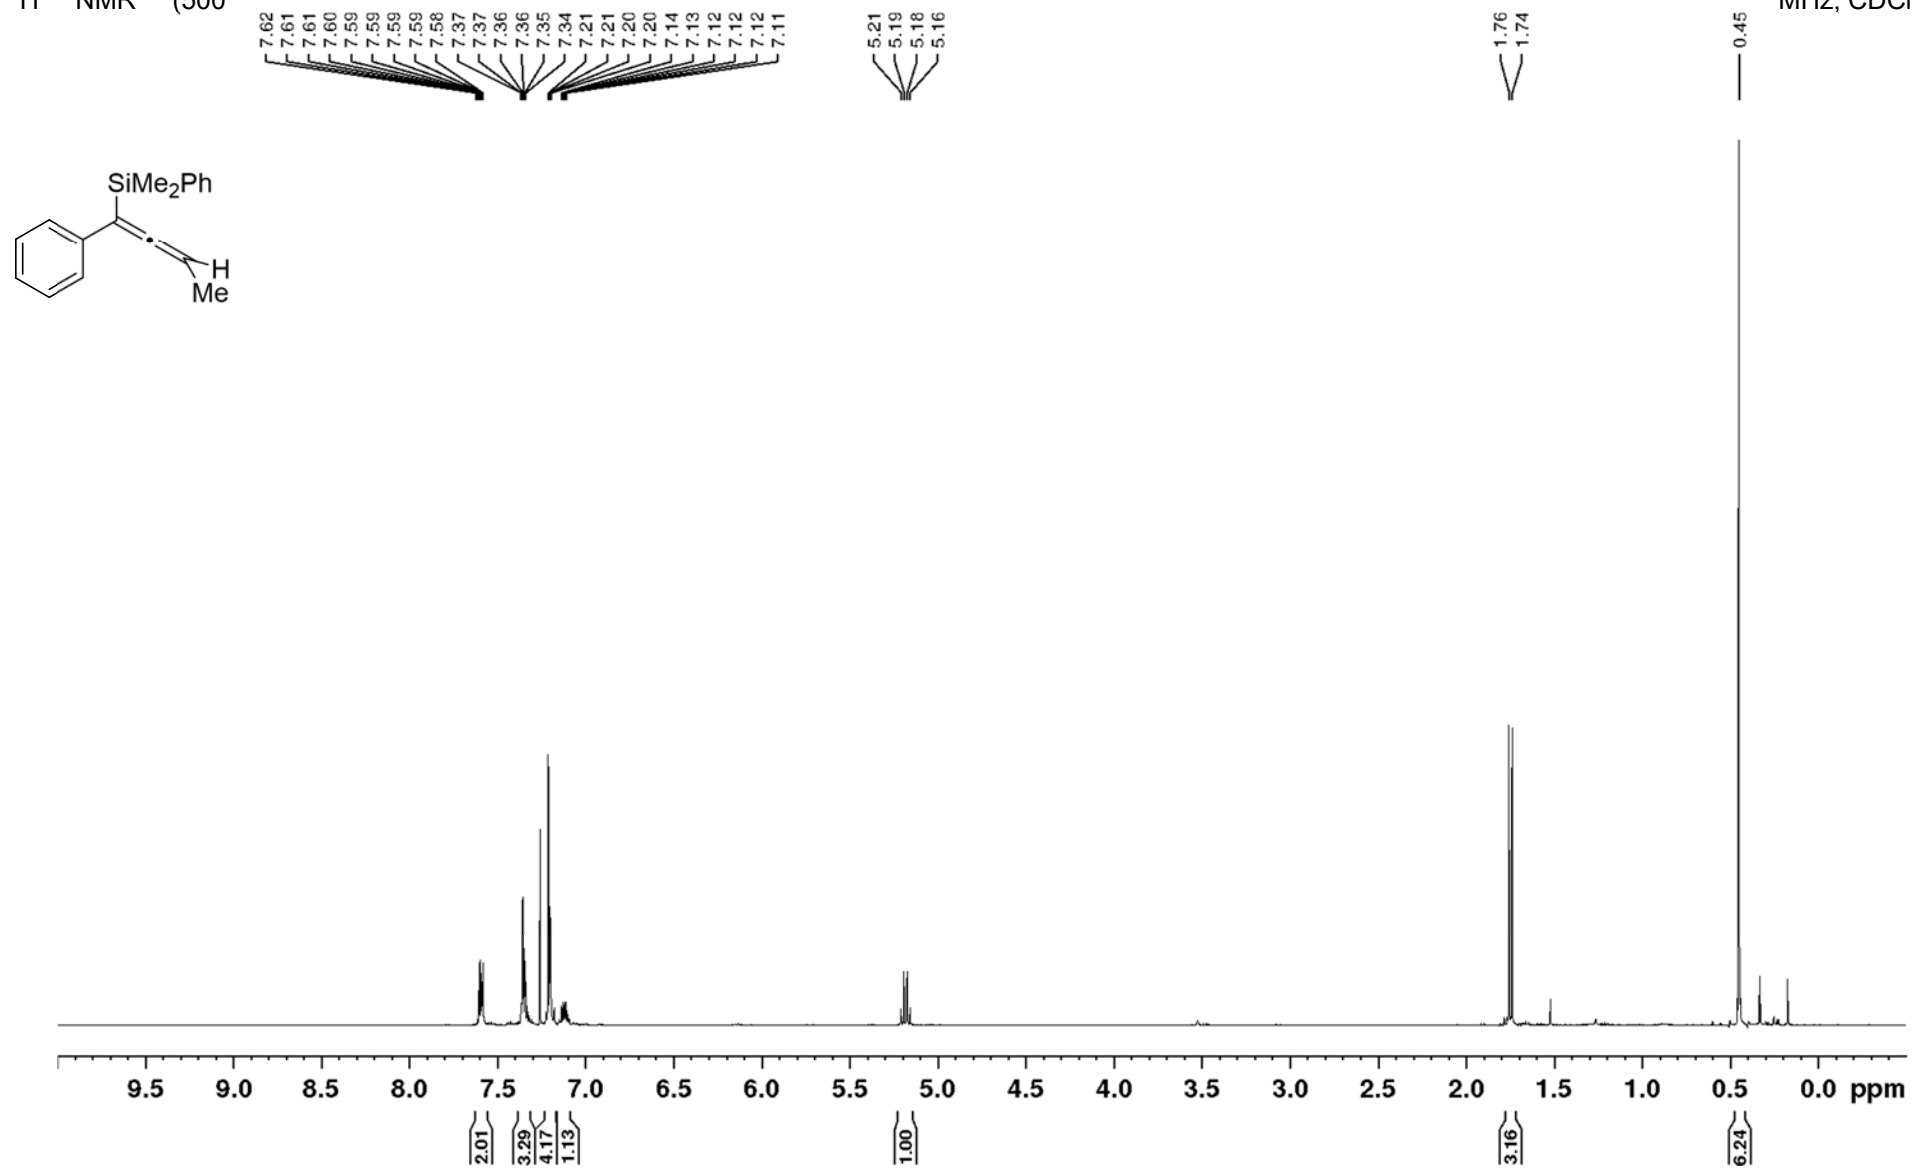

## SUPPORTING INFORMATION

 $^{13}\text{C}\{^1\text{H}\}$  NMR (126 MHz,  $\text{CDCl}_3$ ):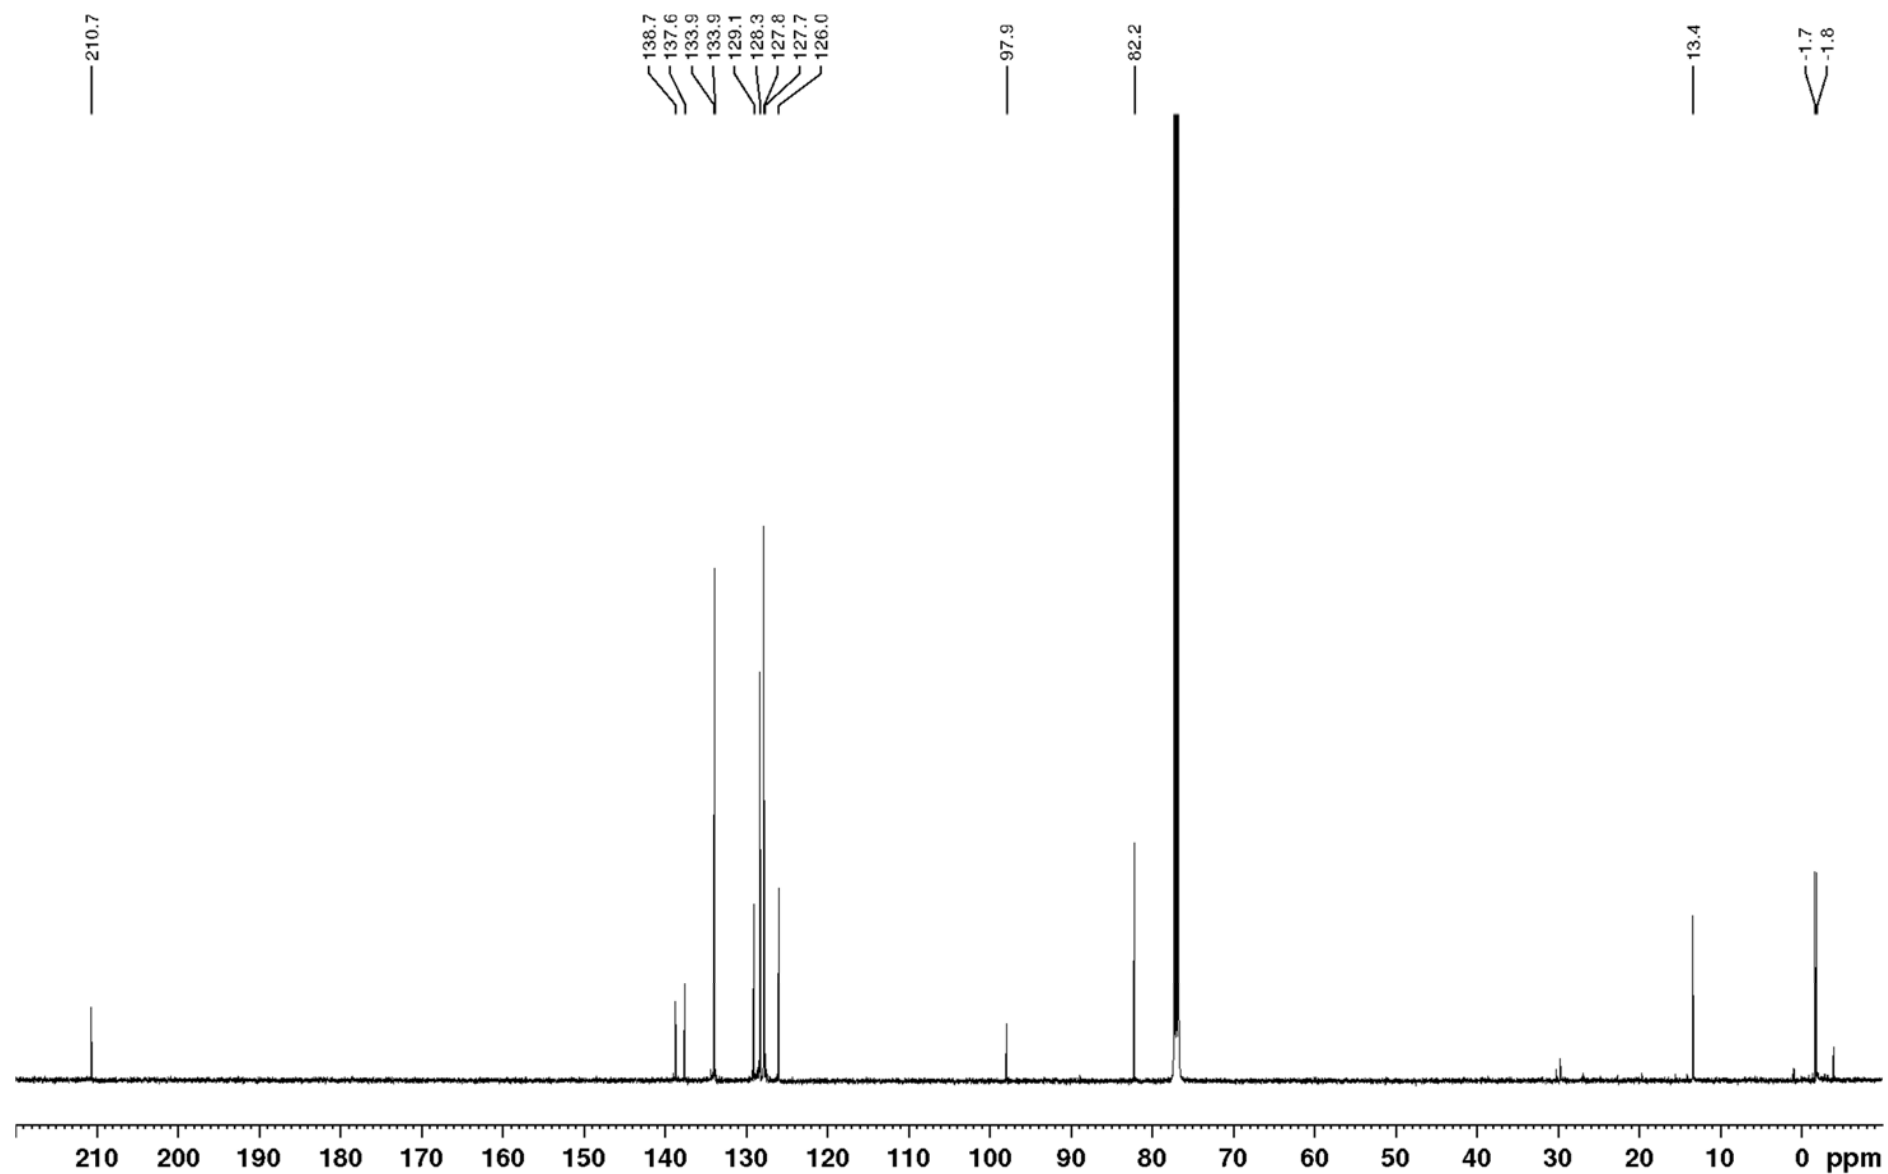

## SUPPORTING INFORMATION

 $^{29}\text{Si}\{^1\text{H}\}$  DEPT NMR (99 MHz,  $\text{CDCl}_3$ ):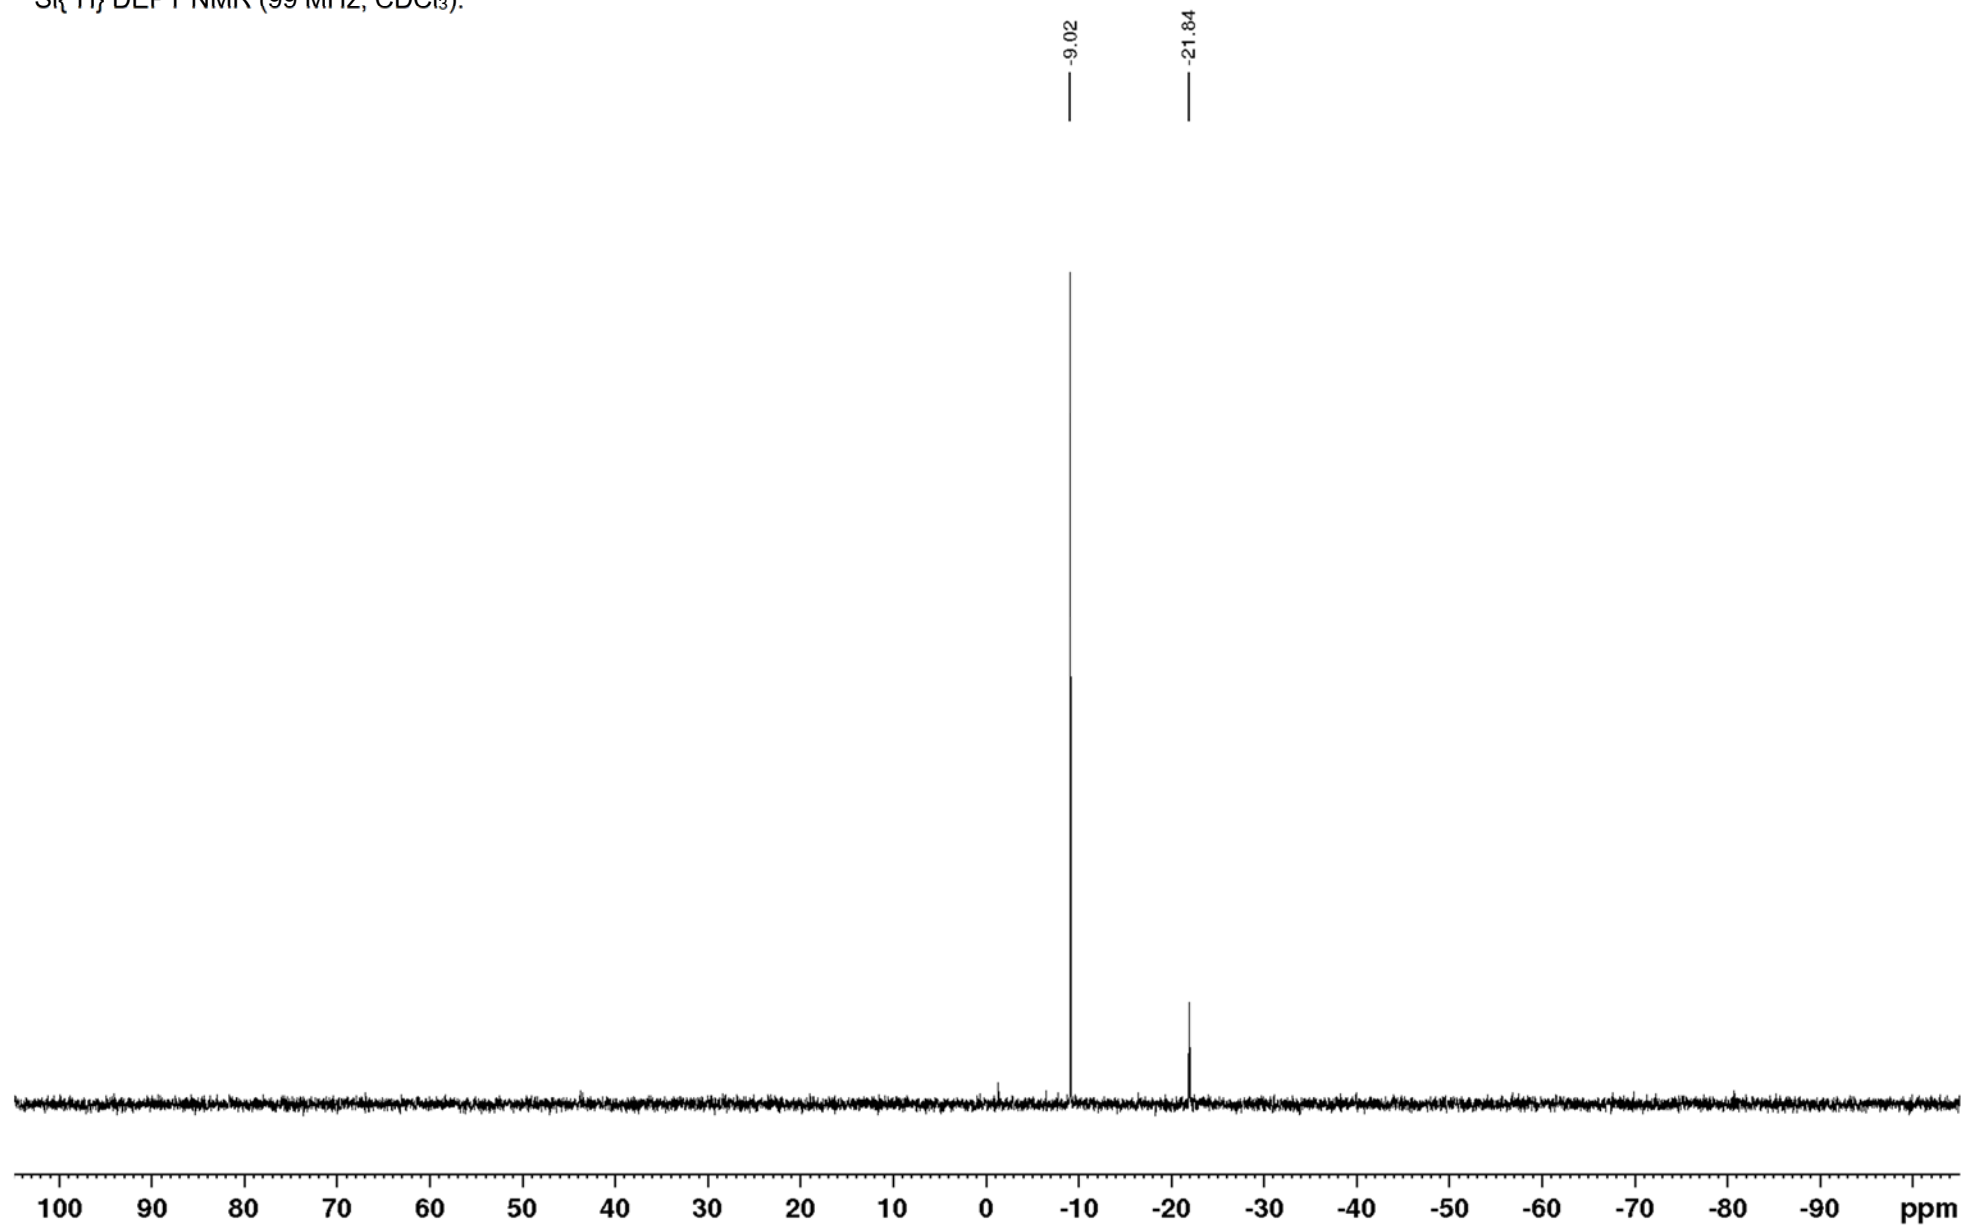

## 9. HPLC Traces of Synthesized Chiral Substrates

## Selected HPLC Traces of Starting materials

The enantiomeric excess of the free amines was determined after derivatization to the corresponding 4-nitrobenzoyl amides, using 4-nitrobenzoyl chloride (1.5 equiv) and Et<sub>3</sub>N (2.0 equiv) in CH<sub>2</sub>Cl<sub>2</sub> at rt.

## 1-(p-tolyl)ethan-1-amine (S1b)

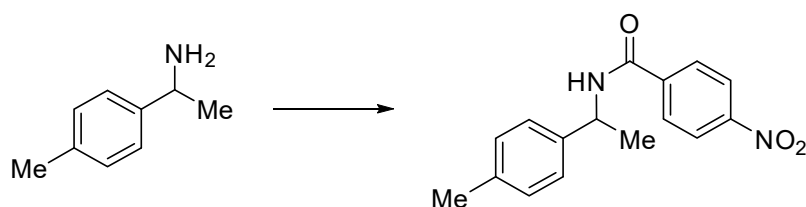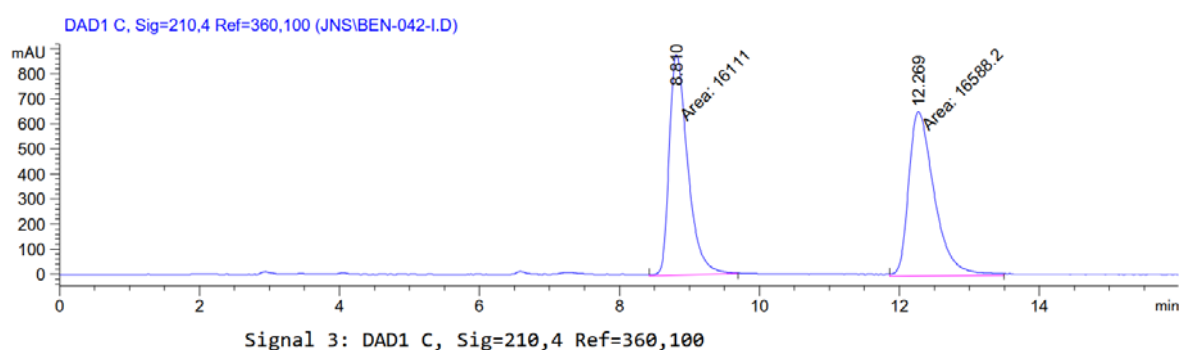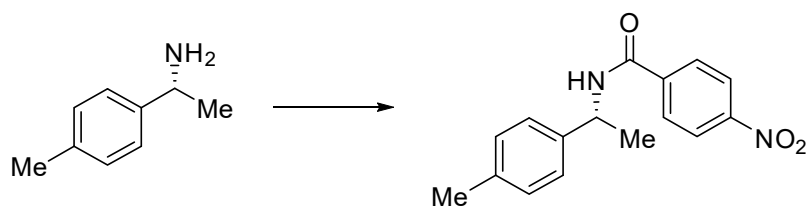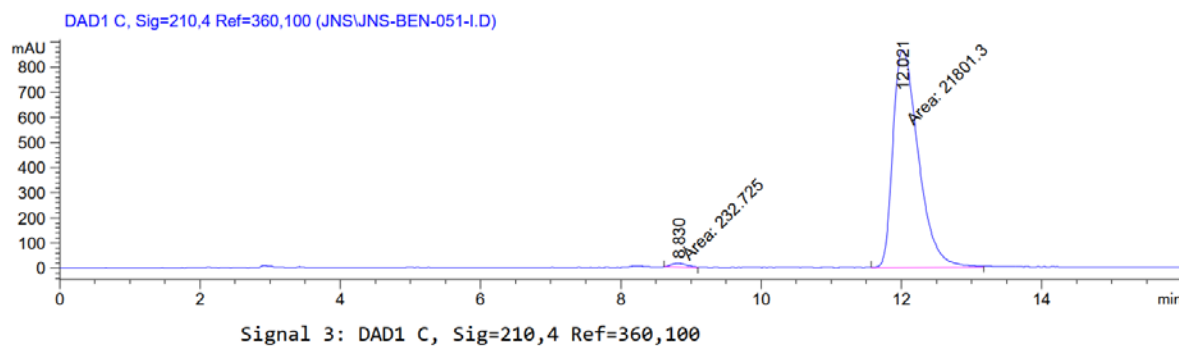

## SUPPORTING INFORMATION

## 1-(m-tolyl)ethan-1-amine (S1c)

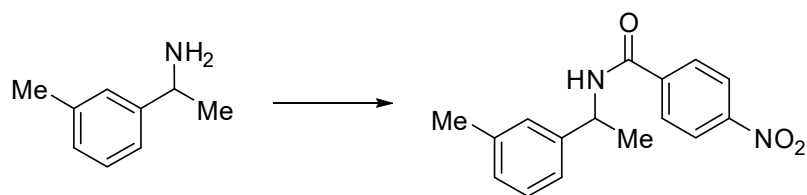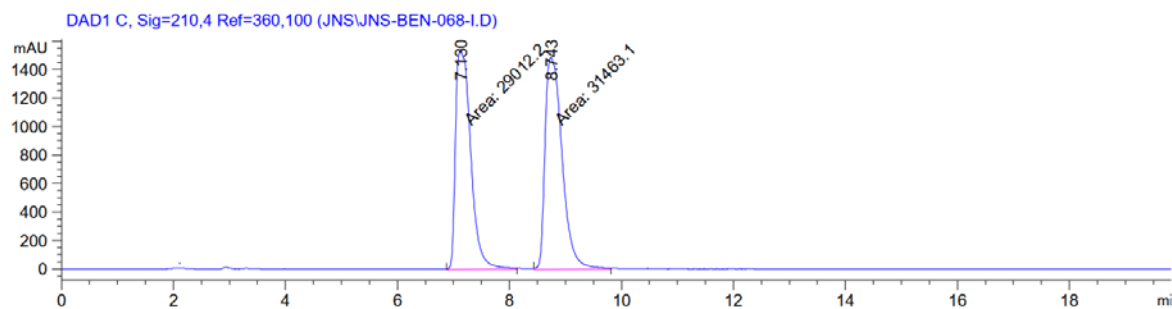

Signal 3: DAD1 C, Sig=210,4 Ref=360,100

| Peak # | RetTime [min] | Type | Width [min] | Area [mAU*s] | Height [mAU] | Area %  |
|--------|---------------|------|-------------|--------------|--------------|---------|
| 1      | 7.130         | MM   | 0.3136      | 2.90122e4    | 1541.67126   | 47.9736 |
| 2      | 8.743         | MM   | 0.3527      | 3.14631e4    | 1486.74390   | 52.0264 |

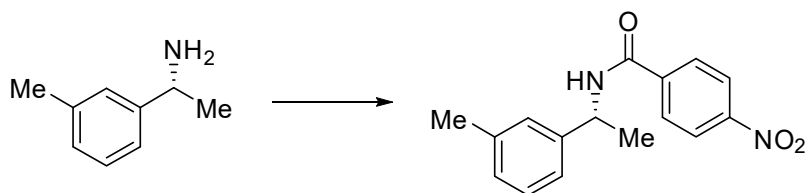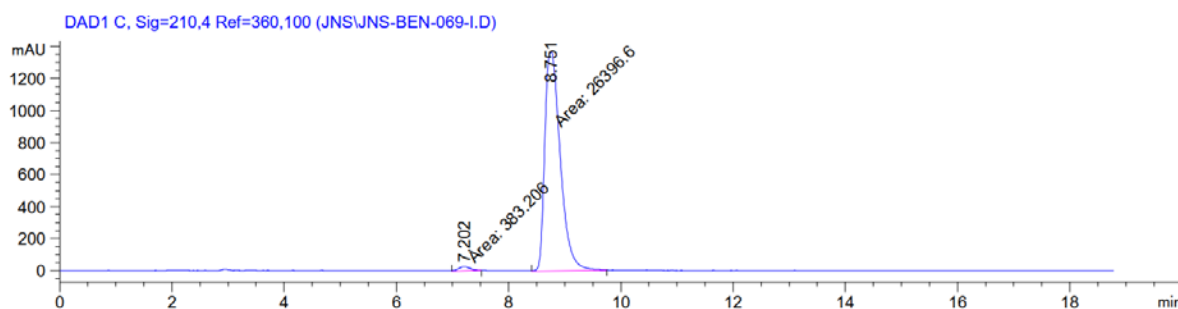

Signal 3: DAD1 C, Sig=210,4 Ref=360,100

| Peak # | RetTime [min] | Type | Width [min] | Area [mAU*s] | Height [mAU] | Area %  |
|--------|---------------|------|-------------|--------------|--------------|---------|
| 1      | 7.202         | MM   | 0.2414      | 383.20621    | 26.45647     | 1.4310  |
| 2      | 8.751         | MM   | 0.3207      | 2.63966e4    | 1371.63818   | 98.5690 |

## SUPPORTING INFORMATION

## 4-(1-aminoethyl)benzoinitrile (S1j)

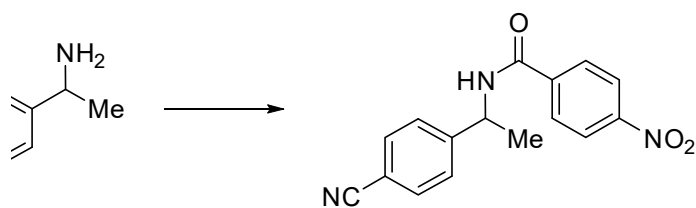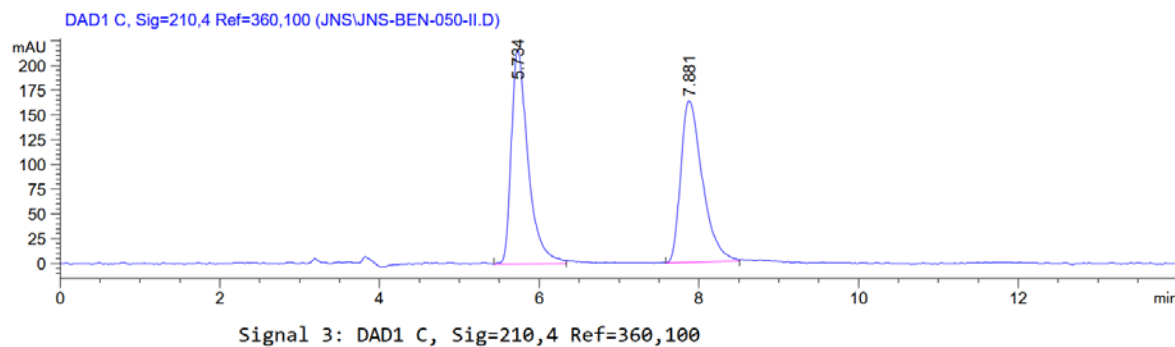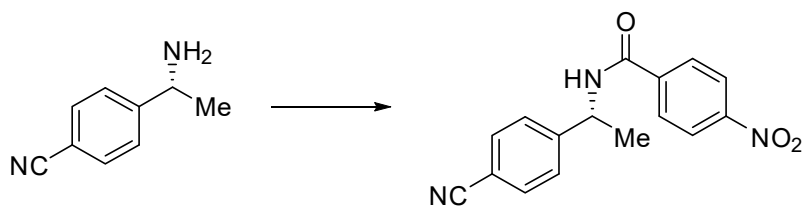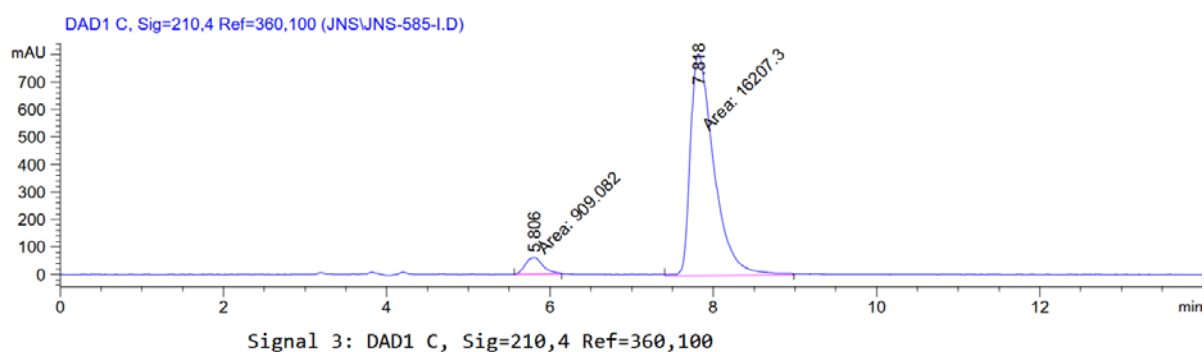

The enantiomeric ratio of 95:5 is a result of slow racemization during the derivatization. The enantiomeric ratio of the corresponding silane (S)-4ja, was determined to be 98.5:1.5 at the stage of the alcohol. The ee of the amine therefore is estimated to be in the same range.



## SUPPORTING INFORMATION

## 10. HPLC Traces of Chiral Silanes

The enantiomeric excess of the silanes was determined after conversion to the corresponding alcohol, except for silane **4ja**, as it was polar enough for normal phase HPLC. (See Ch7 for the standard procedure).

Dimethyl(phenyl)(1-phenylethyl)silane (**4aa**)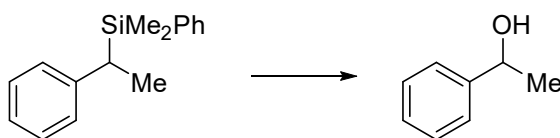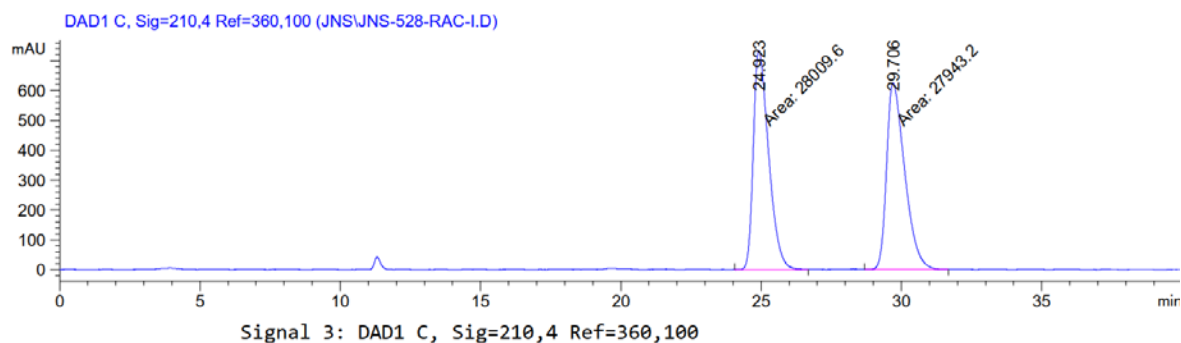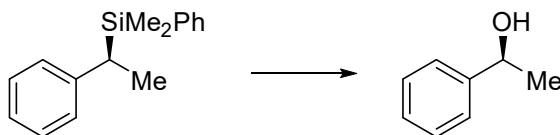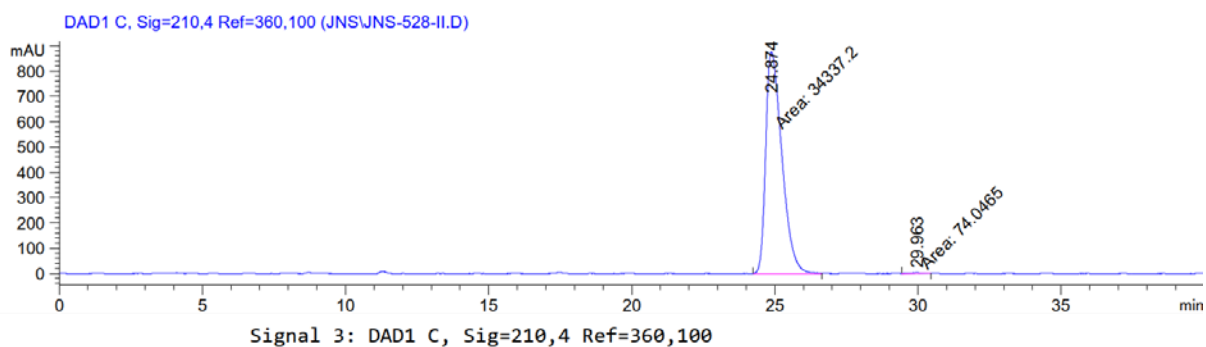

## SUPPORTING INFORMATION

## Dimethyl(phenyl)[1-(p-tolyl)ethyl]silane (4ba)

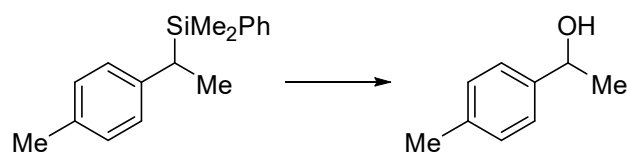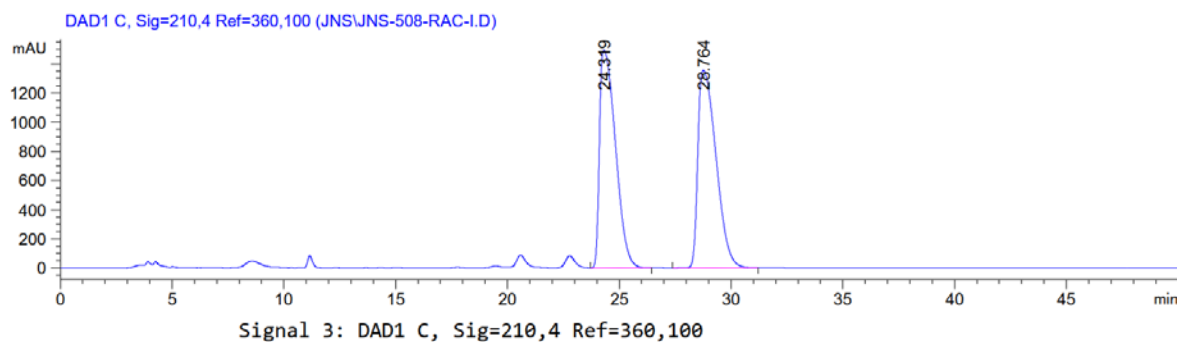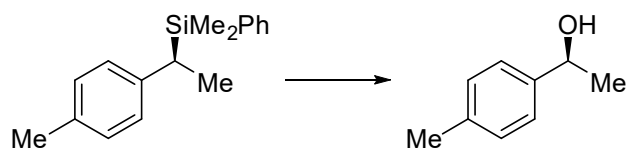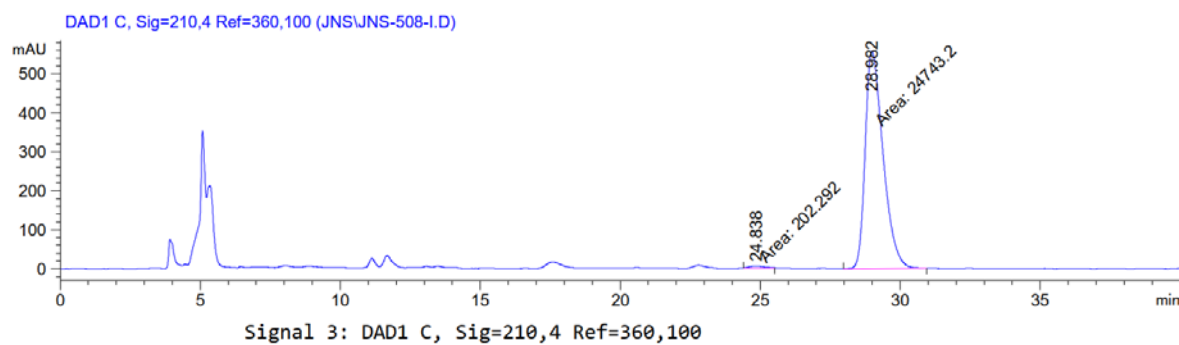

## SUPPORTING INFORMATION

## Dimethyl(phenyl)[1-(m-tolyl)ethyl]silane (4ca)

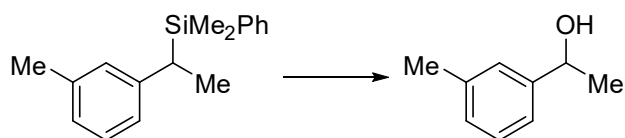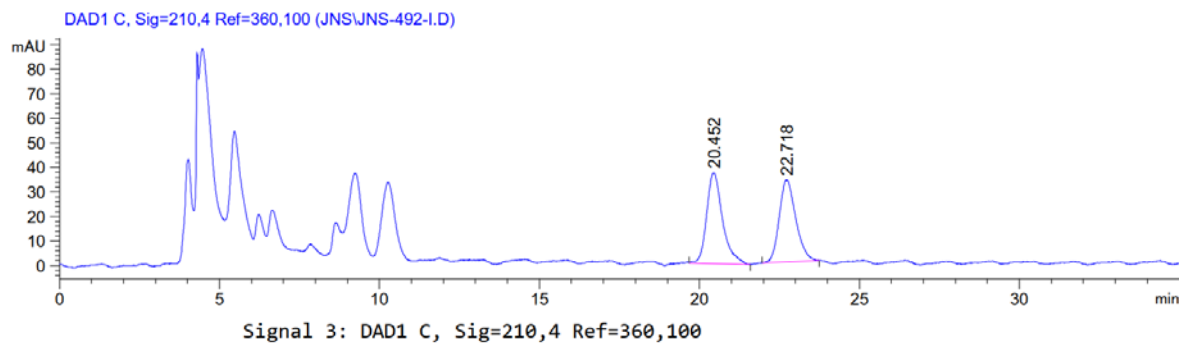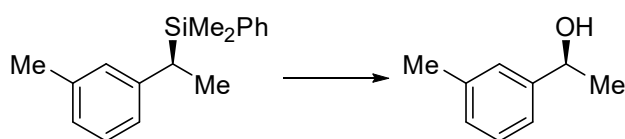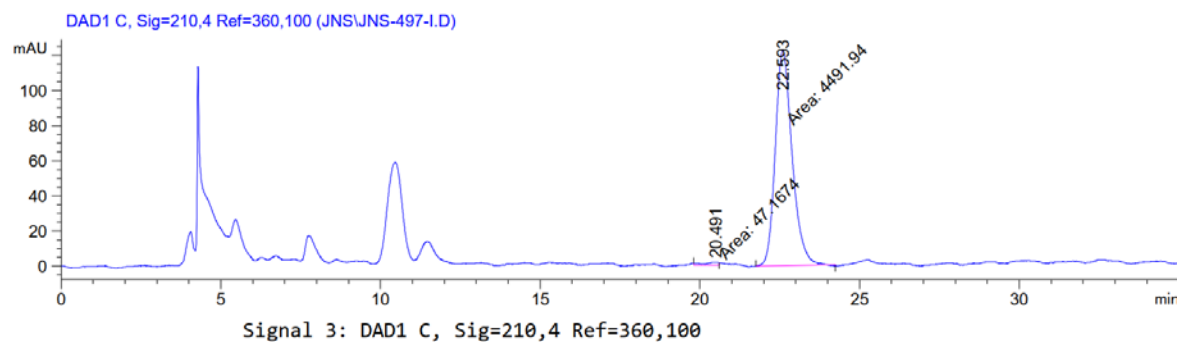

## SUPPORTING INFORMATION

**[1-(4-Methoxyphenyl)ethyl]dimethyl(phenyl)silane (4fa)**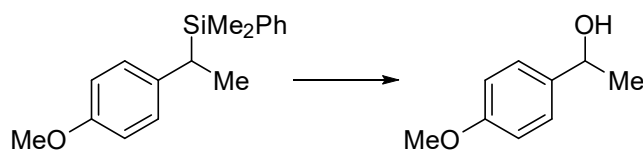

DAD1 C, Sig=210,4 Ref=360,100 (JNSJNS-547-RAC-III.D)

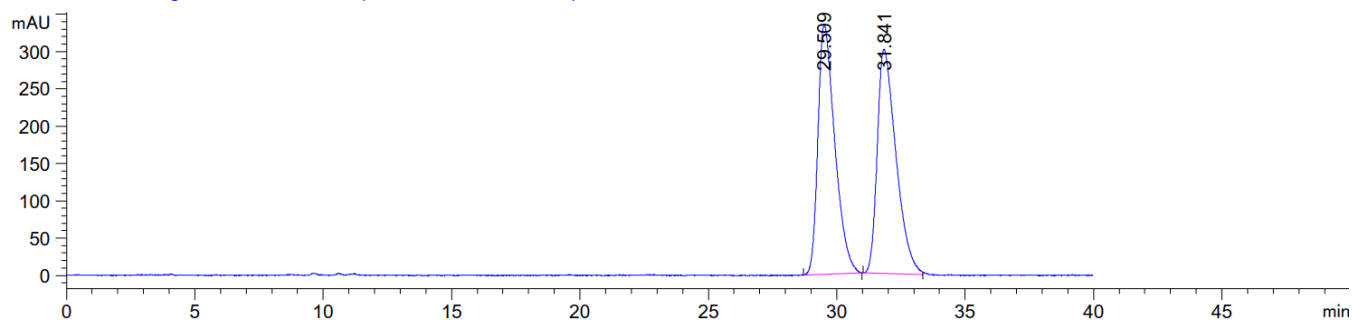

Signal 3: DAD1 C, Sig=210,4 Ref=360,100

| Peak # | RetTime [min] | Type | Width [min] | Area [mAU*s] | Height [mAU] | Area %  |
|--------|---------------|------|-------------|--------------|--------------|---------|
| 1      | 29.509        | BB   | 0.6294      | 1.53093e4    | 334.82629    | 50.0540 |
| 2      | 31.841        | BV   | 0.6967      | 1.52763e4    | 300.70102    | 49.9460 |

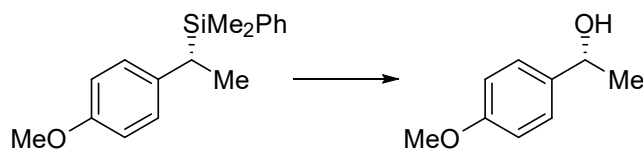

DAD1 C, Sig=210,4 Ref=360,100 (JNSJNS-584-I.D)

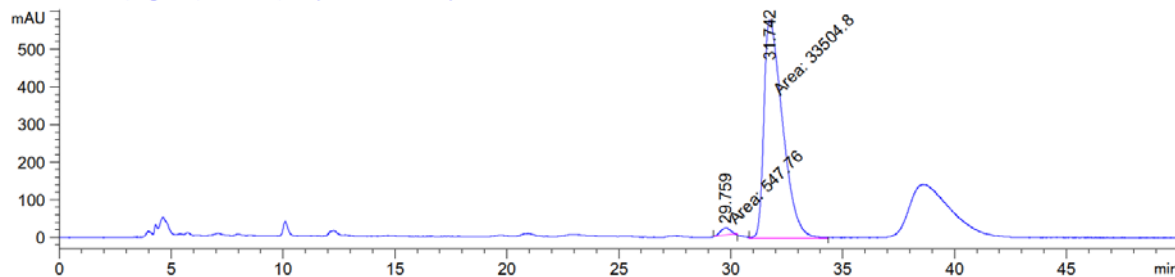

Signal 3: DAD1 C, Sig=210,4 Ref=360,100

| Peak # | RetTime [min] | Type | Width [min] | Area [mAU*s] | Height [mAU] | Area %  |
|--------|---------------|------|-------------|--------------|--------------|---------|
| 1      | 29.759        | MM   | 0.4983      | 547.76031    | 18.32254     | 1.6086  |
| 2      | 31.742        | MM   | 0.9635      | 3.35048e4    | 579.59424    | 98.3914 |

## SUPPORTING INFORMATION

**[1-(4-Fluorophenyl)ethyl]dimethyl(phenyl)silane (4ga)**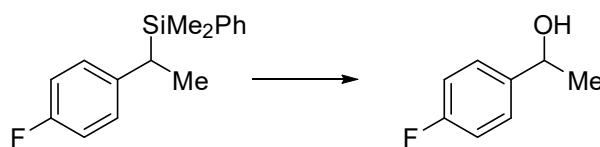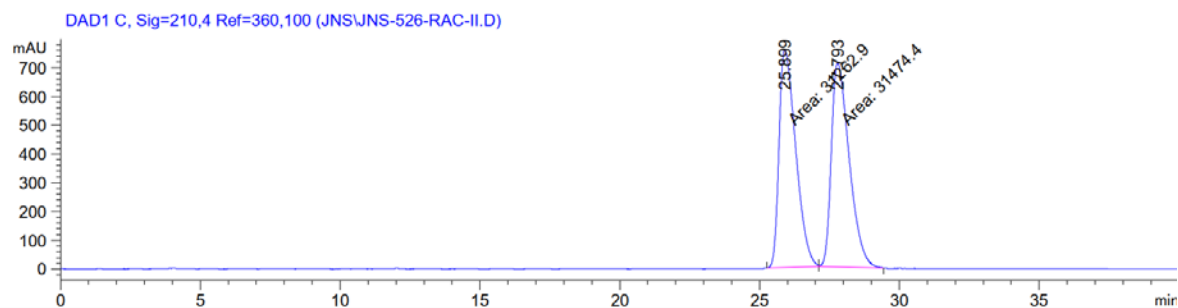

Signal 3: DAD1 C, Sig=210,4 Ref=360,100

| Peak # | RetTime [min] | Type | Width [min] | Area [mAU*s] | Height [mAU] | Area %  |
|--------|---------------|------|-------------|--------------|--------------|---------|
| 1      | 25.899        | MM   | 0.6888      | 3.12629e4    | 756.48669    | 49.8314 |
| 2      | 27.793        | MM   | 0.7413      | 3.14744e4    | 707.66315    | 50.1686 |

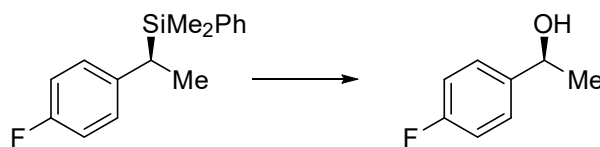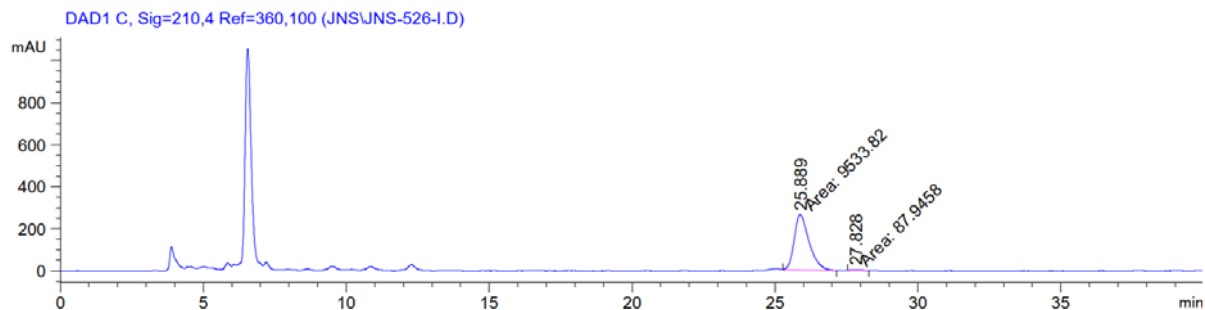

Signal 3: DAD1 C, Sig=210,4 Ref=360,100

| Peak # | RetTime [min] | Type | Width [min] | Area [mAU*s] | Height [mAU] | Area %  |
|--------|---------------|------|-------------|--------------|--------------|---------|
| 1      | 25.889        | MM   | 0.6031      | 9533.81934   | 263.45593    | 99.0860 |
| 2      | 27.828        | MM   | 0.4313      | 87.94580     | 3.39850      | 0.9140  |

## SUPPORTING INFORMATION

## [1-(4-Chlorophenyl)ethyl]dimethyl(phenyl)silane (4ha)

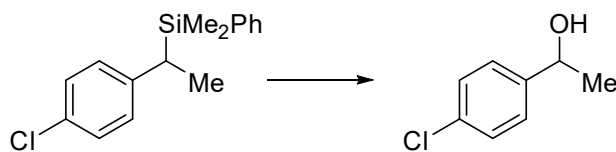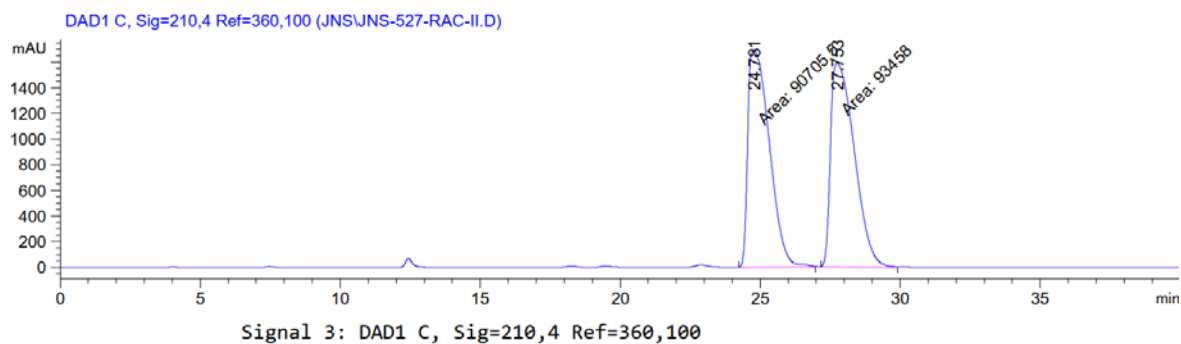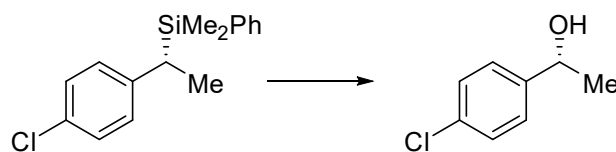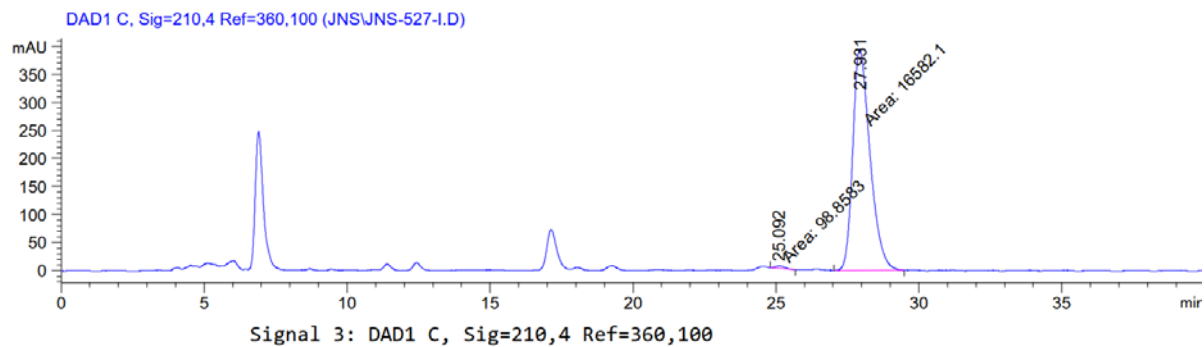

## SUPPORTING INFORMATION

## 4-{1-[Dimethyl(phenyl)silyl]ethyl}benzonitrile (4ja)

This rather polar compound could be resolved without prior derivatization to the alcohol.

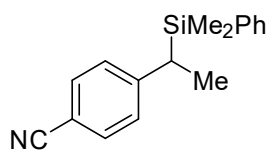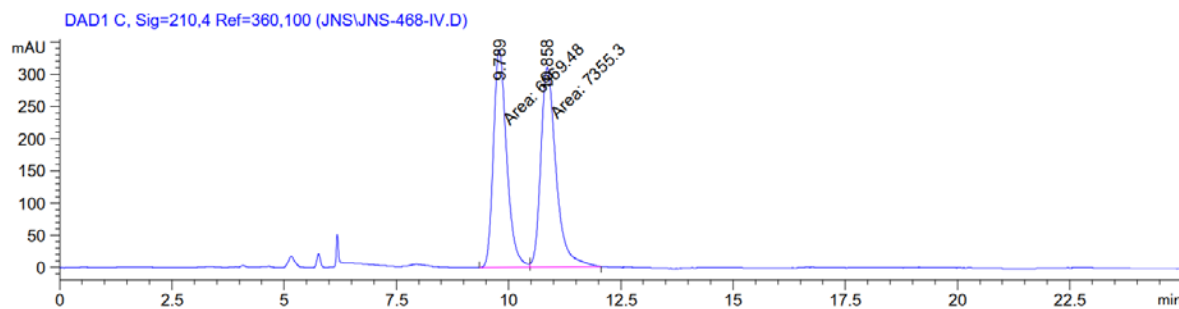

Signal 3: DAD1 C, Sig=210,4 Ref=360,100

| Peak # | RetTime [min] | Type | Width [min] | Area [mAU*s] | Height [mAU] | Area %  |
|--------|---------------|------|-------------|--------------|--------------|---------|
| 1      | 9.789         | MM   | 0.3426      | 6969.47949   | 339.02939    | 48.6533 |
| 2      | 10.858        | MM   | 0.3955      | 7355.30225   | 309.94904    | 51.3467 |

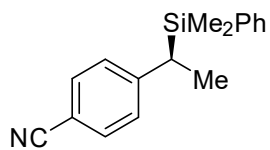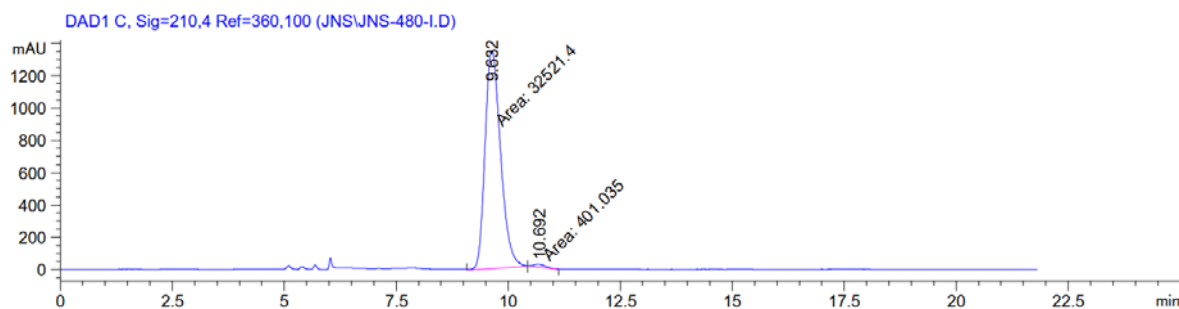

Signal 3: DAD1 C, Sig=210,4 Ref=360,100

| Peak # | RetTime [min] | Type | Width [min] | Area [mAU*s] | Height [mAU] | Area %  |
|--------|---------------|------|-------------|--------------|--------------|---------|
| 1      | 9.632         | MM   | 0.4020      | 3.25214e4    | 1348.40576   | 98.7819 |
| 2      | 10.692        | MM   | 0.3328      | 401.03516    | 20.08642     | 1.2181  |

## SUPPORTING INFORMATION

## Dimethyl[1-(naphthalen-1-yl)ethyl](phenyl)silane (4Ia)

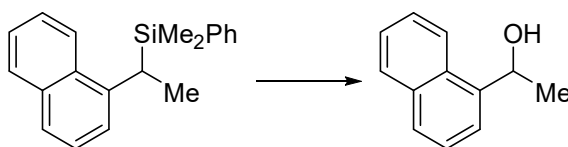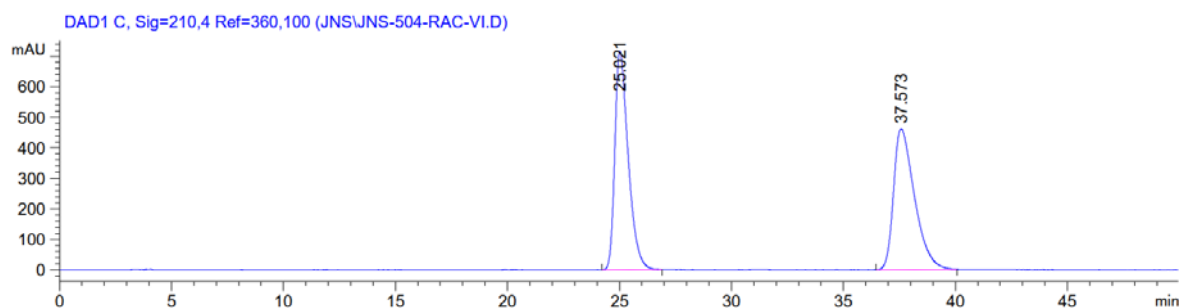

Signal 3: DAD1 C, Sig=210,4 Ref=360,100

| Peak # | RetTime [min] | Type | Width [min] | Area [mAU*s] | Height [mAU] | Area %  |
|--------|---------------|------|-------------|--------------|--------------|---------|
| 1      | 25.021        | BB   | 0.6038      | 2.96568e4    | 715.17938    | 49.7083 |
| 2      | 37.573        | VV   | 0.8586      | 3.00049e4    | 461.44684    | 50.2917 |

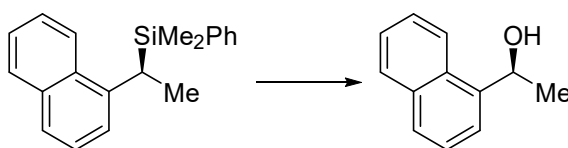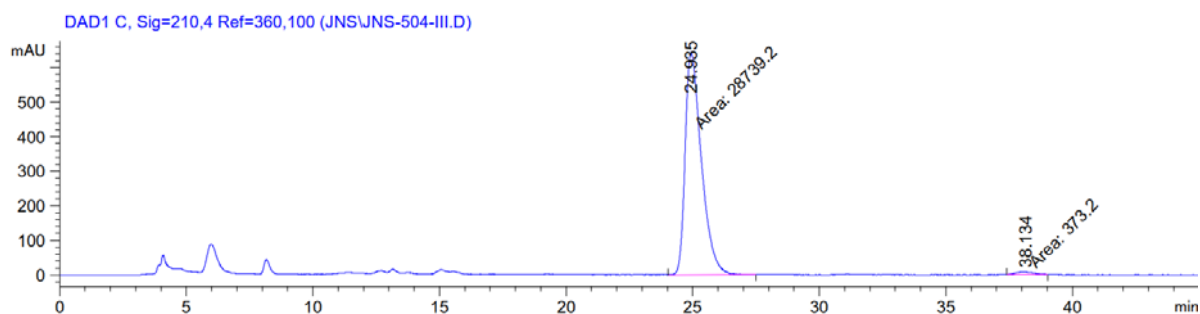

Signal 3: DAD1 C, Sig=210,4 Ref=360,100

| Peak # | RetTime [min] | Type | Width [min] | Area [mAU*s] | Height [mAU] | Area %  |
|--------|---------------|------|-------------|--------------|--------------|---------|
| 1      | 24.935        | MM   | 0.7424      | 2.87392e4    | 645.18597    | 98.7181 |
| 2      | 38.134        | MM   | 0.8170      | 373.19971    | 7.61338      | 1.2819  |



## SUPPORTING INFORMATION

## Dimethyl[1-(naphthalen-2-yl)ethyl](phenyl)silane (4ma)

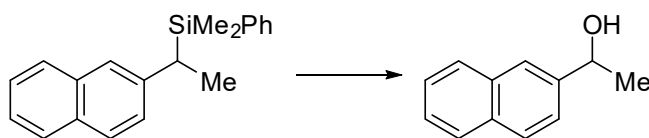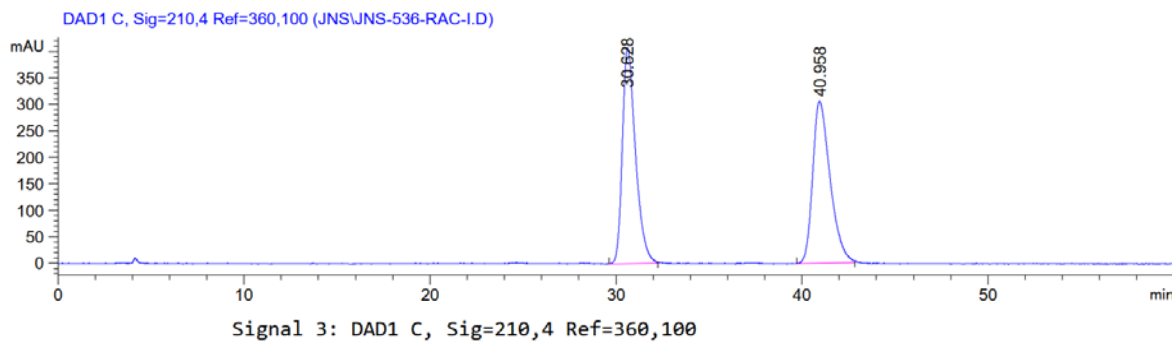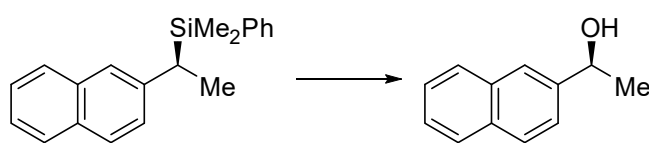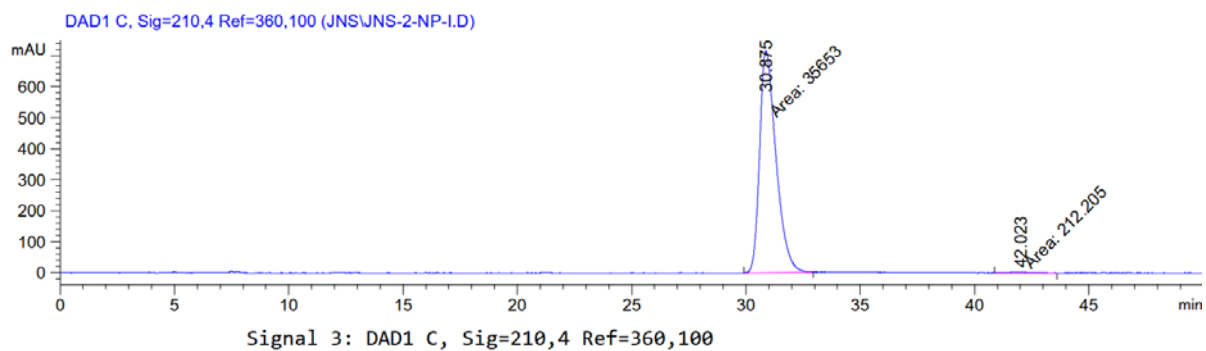

## SUPPORTING INFORMATION

## Dimethyl(3-methyl-1-phenylbuta-1,2-dien-1-yl)(phenyl)silane (6)

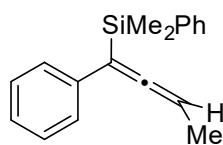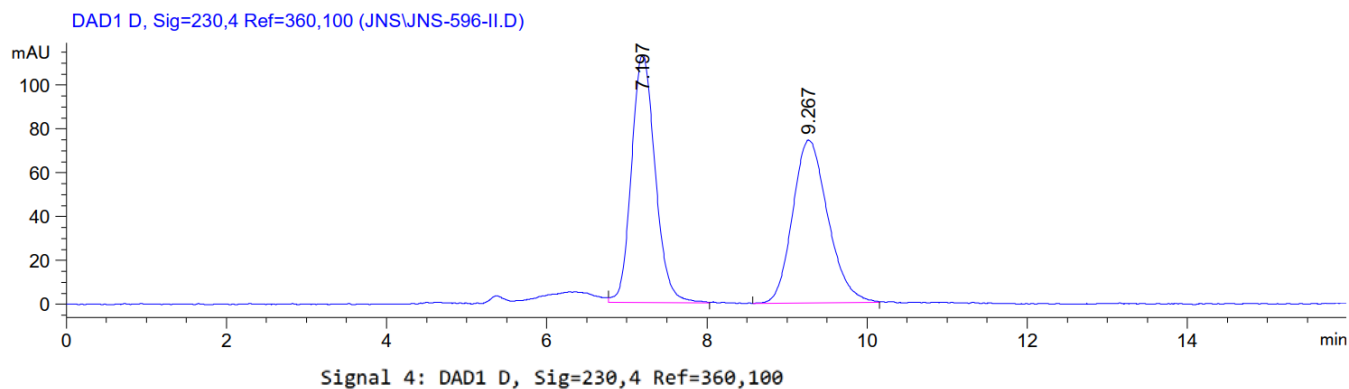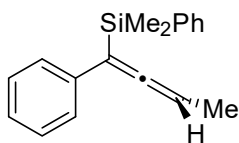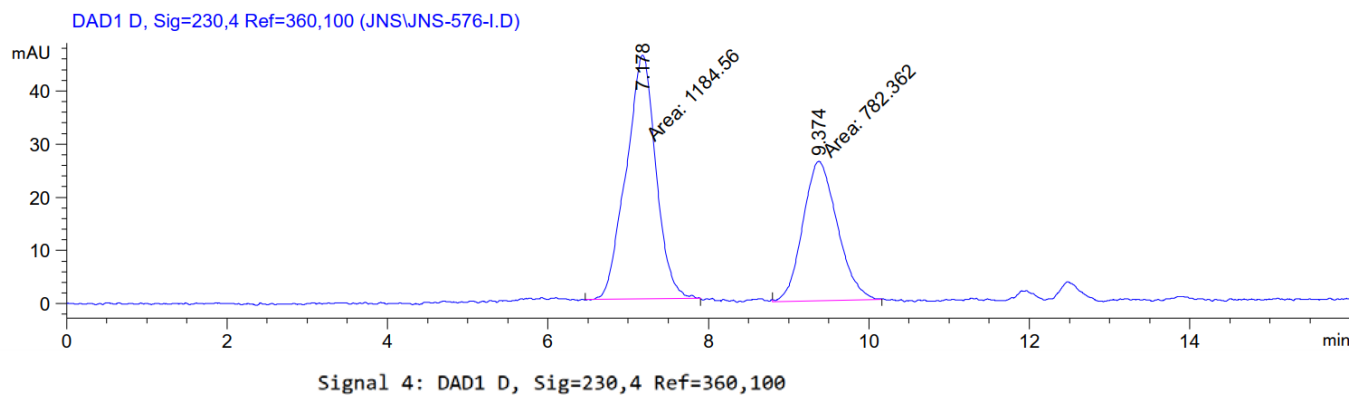

---

**10. References**

---

- [S1] Suginome, M.; Matsuda, T.; Ito, Y. *Organometallics* **2000**, *19*, 4647–4649.
- [S2] R. N. Icke, B. B. Wisegarver, G. A. Alles, *Org. Synth.* **1945**, *25*, 89–90.
- [S3] S. Bhattacharyya, *Synth. Commun.* **2000**, *30*, 2001–2008.
- [S4] G. Borg, D. A. Cogan, J. A. Ellman, *Tetrahedron Letters* **1999**, *40*, 6709–6712.
- [S5] M. Guisán-Ceinos, V. Martín-Heras, M. Tortosa, *J. Am. Chem. Soc.* **2017**, *139*, 8448–8451.
- [S6] C. Gryparis, M. Stratakis, *Chem. Commun.* **2012**, *48*, 10751–10753.
- [S7] J. Hu, H. Sun, W. Cai, X. Pu, Y. Zhang, Z. Shi, *J. Org. Chem.* **2016**, *81*, 14–24
- [S8] P. Maity, D. M. Shacklady-McAtee, G. P. A. Yap, E. R. Sirianni, M. P. Watson, *J. Am. Chem. Soc.* **2013**, *135*, 280–285.
- [S9] D. M. Shacklady-McAtee, K. M. Roberts, C. H. Basch, Y.-G. Song, M. P. Watson, *Tetrahedron* **2014**, *70*, 4257–4263.
- [S10] L.-L. Liao, G.-M. Cao, J.-H. Ye, G.-Q. Sun, W.-J. Zhou, Y.-Y. Gui, S.-S. Yan, G. Shen, D.-G. Yu, *J. Am. Chem. Soc.* **2018**, *140*, 17338–17342.
- [S11] A. P. Cinderella, B. Vulovic, D. A. Watson, *J. Am. Chem. Soc.* **2017**, *139*, 7741–7744.
- [S12] Z. Liu, J. Huo, T. Fu, H. Tan, F. Ye, M. L. Hossain, J. Wang, *Chem. Commun.* **2018**, *54*, 11419–11422.
- [S13] Z.-D. Huang, R. Ding, P. Wang, Y.-H. Xu, T.-P. Loh, *Chem. Commun.* **2016**, *52*, 5609–5612.
- [S14] D. J. Vyas, C. K. Hazra, M. Oestreich, *Org. Lett.* **2011**, *13*, 4462–4465.
- [S15] M. Mato, A. M. Echavarren, *Angew. Chem. Int. Ed.* **2019**, *58*, 2088–2092; *Angew. Chem.* **2019**, *131*, 2110–2114.
- [S16] K. Hojoh, Y. Shido, K. Nagao, S. Mori, H. Ohmiya, M. Sawamura, *Tetrahedron* **2015**, *71*, 6519–6533.
- [S17] T. H. Chan, P. Pellon, *J. Am. Chem. Soc.* **1989**, *111*, 8737–8738.
